# Supplementary material for: Integrative analysis of transcriptome, proteome, and ubiquitome changes during rose petal abscission
Source: Front Plant Sci. 2022 Oct 19;13:1041141. doi: 10.3389/fpls.2022.1041141 (PMC9627506; doi:10.3389/fpls.2022.1041141)
Supplement: Supplementary file 1 [file DataSheet_1.xlsx]

## Sheet: Sheet1
Supplementary Table 1. Differentially expressed genes
#ID	S3-1	S3-2	S3-3	S5-1	S5-2	S5-3
RchiOBHmCPg0501801.gene	0.985225	0.857098	0.864222	2.31083	2.28257	2.15932
RchiOBHmCPg0502011.gene	0.686857	0.379429	0.490368	2.52018	2.42529	2.71474
RchiOBHmCPg0502221.gene	28.0172	0.013125	0.000676	66.0318	78.9325	57.7383
RchiOBHmCPg0502481.gene	0.552074	0.414443	0.669128	2.3604	2.1295	3.16463
RchiOBHmChr0c16g0499741.gene	0.127361	0.039958	0.042918	0.529965	0.859469	0.582508
RchiOBHmChr0c16g0499921.gene	8.07464	7.88388	6.41858	3.35765	3.2574	3.70073
RchiOBHmChr0c19g0500161.gene	9.85428	7.53156	17.3868	38.3111	25.3006	48.592
RchiOBHmChr0c20g0500261.gene	1.27745	1.24343	0.689704	6.31997	7.20055	5.00594
RchiOBHmChr0c22g0500421.gene	1.04299	0.613696	1.1503	0.210899	0.50591	0.445422
RchiOBHmChr0c28g0500921.gene	2.28039	1.46763	0.514677	8.16786	5.01855	3.87976
RchiOBHmChr0c32g0501561.gene	5.03786	6.16054	14.3185	0.046099	0.810295	0.966862
RchiOBHmChr0c37g0502981.gene	0.638598	0.467067	0.520757	2.27891	3.02127	1.67025
RchiOBHmChr0c40g0503371.gene	10.6009	8.32401	5.35976	3.52771	1.13891	3.48286
RchiOBHmChr0c40g0503381.gene	21.1483	20.2094	19.4537	11.7588	13.5937	9.84893
RchiOBHmChr0c40g0503401.gene	0	0	0	1.8503	1.44098	2.33277
RchiOBHmChr1g0313211.gene	16.8529	17.9264	19.4681	9.52182	10.0651	7.19938
RchiOBHmChr1g0313331.gene	4.8095	3.7729	2.85364	11.5438	13.7134	9.53084
RchiOBHmChr1g0313371.gene	0.142243	0.167395	0	3.96781	2.39579	6.89733
RchiOBHmChr1g0313431.gene	45.6122	48.9825	44.9858	14.8649	20.2326	18.946
RchiOBHmChr1g0313711.gene	4.76793	4.84947	4.94781	0.417697	0.353301	0
RchiOBHmChr1g0313741.gene	32.8679	40.1217	39.0113	12.476	11.8339	7.74578
RchiOBHmChr1g0314081.gene	86.5467	73.0318	60.3307	48.6325	24.1304	23.5163
RchiOBHmChr1g0314151.gene	1001	934.944	1427.34	320.881	296.108	250.87
RchiOBHmChr1g0314311.gene	0.70269	0.92572	0.81816	2.10537	2.19343	3.32902
RchiOBHmChr1g0314321.gene	3.64575	3.28062	4.45943	26.3821	20.3849	24.7064
RchiOBHmChr1g0314631.gene	3.13606	2.69554	3.46895	1.53028	0.814566	2.26806
RchiOBHmChr1g0314821.gene	1.63316	1.58363	1.01173	4.38415	4.73607	6.49226
RchiOBHmChr1g0314931.gene	195.402	200.863	256.023	16.2882	17.8527	19.3033
RchiOBHmChr1g0315761.gene	155.988	88.0953	103.161	52.0827	48.214	58.6942
RchiOBHmChr1g0315871.gene	1.25764	0.751428	0.854836	2.94655	2.58603	4.11564
RchiOBHmChr1g0315881.gene	1.10141	1.88956	1.99213	7.30621	6.16183	7.55783
RchiOBHmChr1g0315981.gene	4.83396	6.24141	5.7535	0.430998	0.544677	0.342003
RchiOBHmChr1g0316521.gene	1.91834	2.20371	2.46473	12.302	6.14492	8.87446
RchiOBHmChr1g0316841.gene	0.152854	0.3934	0.084039	2.19812	2.49784	1.23239
RchiOBHmChr1g0317031.gene	1.41617	1.67047	1.7805	10.4256	9.75514	9.38851
RchiOBHmChr1g0317061.gene	4.04212	3.66815	4.51467	35.7229	36.0279	30.3463
RchiOBHmChr1g0317081.gene	20.3207	19.8567	21.8978	19.1788	11.8185	10.9671
RchiOBHmChr1g0317111.gene	109.708	113.891	134.506	31.4144	33.0221	30.5422
RchiOBHmChr1g0317291.gene	2.75655	3.16776	3.40912	0.313826	0.61193	0.78842
RchiOBHmChr1g0317301.gene	0.641767	0.940971	1.17947	4.77967	3.20385	2.21724
RchiOBHmChr1g0317371.gene	0.754481	0.976281	0.788096	2.45995	3.25394	2.75552
RchiOBHmChr1g0317691.gene	1.13136	0.722755	1.12097	6.42791	6.08534	5.07466
RchiOBHmChr1g0317781.gene	0.882644	0.891322	0.803602	0.249418	0.093761	0.149634
RchiOBHmChr1g0317901.gene	0.034731	0	0	1.72319	0.86849	1.33476
RchiOBHmChr1g0317931.gene	0.40673	0.226812	0.445797	8.48787	6.34397	4.03043
RchiOBHmChr1g0318441.gene	9.11058	11.9861	12.0882	5.89089	4.91631	5.03817
RchiOBHmChr1g0318491.gene	7.20859	7.81844	7.9516	5.37889	3.80369	3.83948
RchiOBHmChr1g0318551.gene	0.994943	1.11762	1.42388	0.162049	0.215526	0.36934
RchiOBHmChr1g0318771.gene	5.84614	6.88156	6.87748	3.69083	2.11058	4.1058
RchiOBHmChr1g0319071.gene	0.752762	0.897309	0.935404	2.43347	3.57696	3.70864
RchiOBHmChr1g0319461.gene	2.89453	3.25659	3.85246	0.381212	1.27932	1.88292
RchiOBHmChr1g0319511.gene	9.37305	10.91	9.51398	1.55547	2.02497	1.23934
RchiOBHmChr1g0319831.gene	2.69448	4.6542	1.12761	0	0.465065	0.046421
RchiOBHmChr1g0320841.gene	0	0	0	3.17361	1.23843	2.93841
RchiOBHmChr1g0321121.gene	0.489803	0.284968	4.94945	11.7231	12.8981	8.05951
RchiOBHmChr1g0321131.gene	1.04228	0.538689	0.498091	2.16083	1.85019	1.70539
RchiOBHmChr1g0321181.gene	115.264	132.288	178.413	18.1174	21.8799	21.1757
RchiOBHmChr1g0321311.gene	6.89471	8.085	3.49243	23.0869	23.5893	20.2904
RchiOBHmChr1g0321331.gene	4.55028	4.41528	4.21314	22.2743	25.9873	17.5861
RchiOBHmChr1g0321701.gene	0.474497	1.06604	2.94695	5.10269	4.66328	4.15351
RchiOBHmChr1g0321761.gene	45.0404	56.0335	56.4229	14.0633	14.2907	10.4416
RchiOBHmChr1g0321871.gene	0.173882	0.104923	0.216476	0.756283	0.527703	0.601538
RchiOBHmChr1g0321951.gene	2.24613	2.39655	1.23241	9.32416	9.75569	9.0743
RchiOBHmChr1g0323241.gene	13.4221	14.7565	12.294	40.9515	39.9538	38.3685
RchiOBHmChr1g0323431.gene	5.09437	5.17165	4.18517	1.97774	1.8968	1.61809
RchiOBHmChr1g0323861.gene	1.56469	1.85964	1.78283	4.85693	4.2256	5.26547
RchiOBHmChr1g0324291.gene	1.0167	1.29679	1.41544	7.08835	6.21286	7.99115
RchiOBHmChr1g0324501.gene	4.14262	8.79939	3.52589	12.2634	15.7676	15.4224
RchiOBHmChr1g0324511.gene	9.23278	7.97957	6.14454	4.05849	5.14255	4.18263
RchiOBHmChr1g0324721.gene	0.32822	0.060374	0.289852	1.40699	1.66284	0.824958
RchiOBHmChr1g0325051.gene	6.00064	7.6471	8.13295	0.894833	1.64059	1.39069
RchiOBHmChr1g0325321.gene	1.00174	0.902812	1.27653	2.89562	2.96648	3.22424
RchiOBHmChr1g0325611.gene	0.039336	0.045573	0.060704	0.371596	0.640563	0.469861
RchiOBHmChr1g0325651.gene	81.8568	84.569	66.5475	269.538	282.116	176.699
RchiOBHmChr1g0325821.gene	9.31412	6.01926	5.95186	25.9698	37.8173	26.3951
RchiOBHmChr1g0326431.gene	6.77843	6.36536	4.9908	18.8077	14.8838	13.7165
RchiOBHmChr1g0327331.gene	8.78853	13.9197	15.9988	0.853665	4.02338	2.46711
RchiOBHmChr1g0327711.gene	1.3632	0.304542	0.879637	3.91018	3.89975	2.6554
RchiOBHmChr1g0327721.gene	0.669989	0.624426	0.243916	1.90011	2.41732	2.20221
RchiOBHmChr1g0327951.gene	3.69779	4.35336	4.27439	2.06191	2.99316	1.68351
RchiOBHmChr1g0329041.gene	0.73664	0.439446	0.411049	2.42533	2.13808	1.64066
RchiOBHmChr1g0329221.gene	2.70473	4.41151	3.77559	19.2279	23.1305	17.8039
RchiOBHmChr1g0329231.gene	6.42091	6.3066	6.6159	1.63968	2.05241	3.15468
RchiOBHmChr1g0329241.gene	18.2113	19.794	20.0634	10.1259	7.24666	8.77174
RchiOBHmChr1g0329431.gene	0	0	0	2.23193	1.9194	1.86004
RchiOBHmChr1g0329881.gene	31.2988	26.8905	32.5469	14.685	17.0276	12.3222
RchiOBHmChr1g0330031.gene	1.16998	0.88596	0.355861	2.43443	2.84334	2.58151
RchiOBHmChr1g0330191.gene	27.6593	26.058	23.2037	5.01556	9.92666	20.6566
RchiOBHmChr1g0330291.gene	14.6109	17.8369	16.7517	9.20803	10.4161	8.89633
RchiOBHmChr1g0330941.gene	50.7336	44.5305	47.7953	20.1095	23.5905	15.2502
RchiOBHmChr1g0330991.gene	359.629	333.012	413.44	104.747	114.693	114.674
RchiOBHmChr1g0331301.gene	2.08574	1.94682	1.55312	0.511824	0.676658	0.120287
RchiOBHmChr1g0331391.gene	0.219473	0.078936	0.112628	0.825521	1.26463	0.876149
RchiOBHmChr1g0331461.gene	0.333408	0.465038	0.407207	3.66779	2.76314	2.21537
RchiOBHmChr1g0331851.gene	2.46624	1.706	2.27332	8.4714	4.74323	8.94303
RchiOBHmChr1g0332071.gene	0.051724	0.299885	0.349054	1.19457	1.91092	0.867199
RchiOBHmChr1g0332431.gene	2.84551	3.29466	3.57434	12.2501	9.42029	10.0538
RchiOBHmChr1g0332921.gene	140.399	131.185	120.944	75.5197	84.0627	62.6884
RchiOBHmChr1g0333131.gene	5.36673	6.42293	6.35178	1.51644	1.67234	1.69895
RchiOBHmChr1g0333641.gene	0.405044	0.279119	0.299228	1.43074	1.36284	1.81239
RchiOBHmChr1g0334381.gene	0.962977	0.326189	0.68966	3.43877	3.67869	2.67226
RchiOBHmChr1g0334521.gene	9.38241	10.8313	11.247	5.38822	5.28694	6.00828
RchiOBHmChr1g0334581.gene	4.14118	4.56335	4.92006	0.409095	0.280988	0.20166
RchiOBHmChr1g0334661.gene	1.1799	0.903	1.13813	0.250191	0.467193	0.675209
RchiOBHmChr1g0334681.gene	8.56415	7.54096	7.55602	3.24048	3.01935	3.33248
RchiOBHmChr1g0334721.gene	7.40759	4.96785	6.20069	28.6635	34.2419	35.5083
RchiOBHmChr1g0334861.gene	25.5256	22.7362	23.9873	87.4077	83.2282	116.55
RchiOBHmChr1g0336301.gene	1.61981	2.27753	2.06997	5.8939	5.73211	3.70212
RchiOBHmChr1g0336511.gene	4.7675	3.93185	3.68394	14.9309	13.3814	14.2261
RchiOBHmChr1g0336871.gene	3.66442	3.94661	3.58008	17.9269	19.941	13.1281
RchiOBHmChr1g0336921.gene	0.184426	0.160637	0.513002	3.81489	2.01188	1.9774
RchiOBHmChr1g0337221.gene	8.71396	9.07401	8.15244	5.75582	5.9726	3.2984
RchiOBHmChr1g0339591.gene	5.80851	5.30316	4.94104	15.9578	14.3733	11.0285
RchiOBHmChr1g0339861.gene	0.646677	0.170696	0.06807	6.91619	3.50943	2.35492
RchiOBHmChr1g0339941.gene	0.22501	0.308544	0.285509	1.47174	1.21409	1.92271
RchiOBHmChr1g0340151.gene	2.0804	1.69065	1.12251	11.4041	10.3307	10.3001
RchiOBHmChr1g0340411.gene	0.247462	0.303625	0.135377	1.46661	1.24386	0.863639
RchiOBHmChr1g0340481.gene	0.229313	0.258843	0.112692	8.66254	7.61949	0.952179
RchiOBHmChr1g0340521.gene	0.074651	0.07272	0.100227	0.616088	0.494984	0.316951
RchiOBHmChr1g0340711.gene	1.10469	0.945989	0.810391	7.43945	5.05863	6.56644
RchiOBHmChr1g0340871.gene	1.739	0.97591	1.34858	0.105147	0.585058	0.679458
RchiOBHmChr1g0341491.gene	6.93888	4.32271	5.22197	3.89485	2.96907	3.19978
RchiOBHmChr1g0341501.gene	0.055588	0.138394	0.349988	5.04061	3.33608	2.36795
RchiOBHmChr1g0341561.gene	25.4378	23.0626	20.551	94.0714	95.5455	52.7424
RchiOBHmChr1g0342541.gene	19.5392	15.6789	15.8702	9.92565	5.09436	9.98176
RchiOBHmChr1g0342721.gene	4.17225	2.74465	3.58914	0	0.108791	0.048525
RchiOBHmChr1g0343241.gene	0.480025	0.663455	0.493766	2.17748	1.45762	1.33409
RchiOBHmChr1g0343301.gene	164.877	164.11	182.048	88.0574	80.9194	108.689
RchiOBHmChr1g0343481.gene	280.67	292.511	338.186	25.9943	1.58574	29.2894
RchiOBHmChr1g0343491.gene	383.218	462.167	651.211	27.9334	57.8804	28.5841
RchiOBHmChr1g0343521.gene	25.6876	18.7885	25.8478	2.11172	1.37571	1.96899
RchiOBHmChr1g0343531.gene	1.44379	1.34327	3.27371	0.044746	0.251341	0.061044
RchiOBHmChr1g0343551.gene	10.4648	5.31967	11.0686	0.027309	0.675695	0.050144
RchiOBHmChr1g0343691.gene	908.3	1162.6	1592.93	114.053	147.415	143.067
RchiOBHmChr1g0343721.gene	113.497	81.6528	149.943	0.32963	2.20082	1.0195
RchiOBHmChr1g0343731.gene	3.71177	2.53653	4.17394	0.054729	0	0
RchiOBHmChr1g0343791.gene	156.964	185.196	209.807	21.168	19.6251	24.6263
RchiOBHmChr1g0344071.gene	2.95276	3.46782	2.11187	17.835	14.3773	13.8899
RchiOBHmChr1g0344261.gene	0.418757	0.478652	0.439447	2.95903	2.81901	3.09525
RchiOBHmChr1g0344361.gene	39.5426	43.6507	41.0323	9.14961	11.8774	23.7951
RchiOBHmChr1g0344371.gene	15.0747	17.5772	16.0063	7.16355	8.37768	8.11881
RchiOBHmChr1g0344381.gene	20.6639	21.2375	22.5925	7.38687	7.84985	9.06787
RchiOBHmChr1g0344521.gene	1.99679	2.24038	1.97208	0.599065	0.705984	0.518596
RchiOBHmChr1g0344701.gene	2.53421	1.68177	2.1147	5.22625	5.55165	6.06345
RchiOBHmChr1g0345331.gene	3.29623	2.67156	3.35778	9.7949	6.70779	12.0813
RchiOBHmChr1g0345981.gene	12.177	7.95672	11.9199	0.440734	1.42722	1.87193
RchiOBHmChr1g0346011.gene	2.48122	1.45005	1.00614	14.2034	14.9939	6.45961
RchiOBHmChr1g0346041.gene	0.636397	1.04103	0.694813	7.86297	5.99214	3.00962
RchiOBHmChr1g0346421.gene	1.55247	2.07518	1.2289	11.5263	10.0011	7.09177
RchiOBHmChr1g0346561.gene	372.797	324.966	318.949	78.4054	123.061	124.653
RchiOBHmChr1g0346701.gene	4.28553	4.68542	4.67884	2.61156	1.48244	1.88792
RchiOBHmChr1g0347281.gene	5.01559	6.67039	5.43493	2.52974	3.54576	2.5694
RchiOBHmChr1g0347441.gene	15.7624	15.5414	15.5319	37.9128	39.3633	39.0765
RchiOBHmChr1g0347581.gene	1.12363	1.23081	1.44459	0.332621	1.09481	0.15566
RchiOBHmChr1g0347831.gene	5.63199	7.06024	4.62004	3.36974	2.99632	3.41538
RchiOBHmChr1g0348011.gene	4.72637	3.53155	3.5692	1.85368	2.46128	1.67238
RchiOBHmChr1g0348051.gene	0.203324	0	0.081691	2.10012	1.98452	3.15743
RchiOBHmChr1g0348141.gene	270.127	425.192	241.151	19.9029	28.5398	37.8283
RchiOBHmChr1g0348271.gene	6.44225	6.70826	4.95137	18.668	13.0013	13.4589
RchiOBHmChr1g0348651.gene	20.9843	17.7017	25.5657	8.8702	10.3863	9.34945
RchiOBHmChr1g0348831.gene	2.4719	2.12667	2.14039	9.15684	13.6681	9.70068
RchiOBHmChr1g0348921.gene	7.79996	9.97267	9.62309	1.64247	2.65004	2.87915
RchiOBHmChr1g0349021.gene	23.8713	26.0356	25.7554	16.4865	16.1266	17.1648
RchiOBHmChr1g0349151.gene	86.6	71.0081	79.9806	48.5637	44.0534	48.6805
RchiOBHmChr1g0349201.gene	1.09262	0.440468	1.05159	4.12802	6.58226	3.64401
RchiOBHmChr1g0349261.gene	8.89959	2.74684	3.14061	16.7615	20.471	20.497
RchiOBHmChr1g0349391.gene	69.222	56.3151	52.7602	20.373	24.2332	16.1032
RchiOBHmChr1g0349511.gene	4.30443	3.65676	2.80663	1.23915	2.03716	1.58881
RchiOBHmChr1g0349751.gene	9.98101	8.74932	11.2364	28.9283	25.4267	21.1565
RchiOBHmChr1g0349971.gene	11.3972	10.1292	9.65914	29.1713	28.536	26.0844
RchiOBHmChr1g0350041.gene	0.102003	0.032531	0.032174	0.493734	0.517249	0.380732
RchiOBHmChr1g0350341.gene	0.773766	0.711561	1.08729	3.34224	3.0624	3.82618
RchiOBHmChr1g0350371.gene	2.44119	2.12909	2.37561	12.0101	11.1116	5.71691
RchiOBHmChr1g0350551.gene	1.1063	0.730569	0.469147	4.59933	3.03882	2.76061
RchiOBHmChr1g0350591.gene	1.38435	1.21509	1.50364	15.7502	14.5727	7.3477
RchiOBHmChr1g0350871.gene	6.36446	5.25936	6.10373	29.5984	35.1296	24.7306
RchiOBHmChr1g0351001.gene	0.727678	1.56531	1.44146	4.96622	5.54351	6.60589
RchiOBHmChr1g0351071.gene	1.68022	1.53924	1.37004	6.83472	3.52506	5.95029
RchiOBHmChr1g0351081.gene	11.8549	12.2643	12.988	7.05428	5.74524	6.82875
RchiOBHmChr1g0351371.gene	30.8259	34.9653	34.9531	7.7873	9.92481	11.0781
RchiOBHmChr1g0351621.gene	0.145723	0.208268	0.167387	1.49028	1.33633	2.37864
RchiOBHmChr1g0351761.gene	1.37879	0.964274	1.13498	0.517536	0.758417	0.16182
RchiOBHmChr1g0352081.gene	35.4463	35.0368	33.8426	15.1287	15.2741	13.7512
RchiOBHmChr1g0352201.gene	0.572397	0.982823	1.0285	4.38562	3.47187	3.01802
RchiOBHmChr1g0352361.gene	38.2024	34.1512	42.6736	21.9439	25.3649	22.7841
RchiOBHmChr1g0352671.gene	12.0154	10.9144	10.9092	26.8697	25.0967	34.5126
RchiOBHmChr1g0352821.gene	3.17329	2.02146	2.86976	7.35133	8.02762	5.5266
RchiOBHmChr1g0353241.gene	5.2809	4.18998	4.37638	9.79894	12.5986	12.2256
RchiOBHmChr1g0353741.gene	36.7571	39.2766	38.4598	21.2403	21.3308	23.3373
RchiOBHmChr1g0354061.gene	3.50293	2.67506	2.09945	21.4828	21.1182	34.2184
RchiOBHmChr1g0354091.gene	5.43937	6.77083	7.06304	12.2965	15.9886	19.5745
RchiOBHmChr1g0354101.gene	8.78908	7.4555	7.05849	5.32456	4.12869	4.13674
RchiOBHmChr1g0354551.gene	0.056081	0.071107	0.017759	1.25276	0.658811	1.01996
RchiOBHmChr1g0354661.gene	4.40415	2.76606	5.3466	2.6909	1.73219	1.78011
RchiOBHmChr1g0355291.gene	0.177222	0.080956	0.304628	0.698293	0.792548	0.735242
RchiOBHmChr1g0355881.gene	5.78366	4.90179	4.52353	18.9215	13.9912	17.1839
RchiOBHmChr1g0355921.gene	0	0	1.25127	3.96067	3.58701	3.21353
RchiOBHmChr1g0356641.gene	4.61739	2.72064	4.05623	12.7682	12.5032	16.3565
RchiOBHmChr1g0356701.gene	1.71467	1.51994	1.2585	3.6013	4.73857	4.19372
RchiOBHmChr1g0356851.gene	100.195	115.478	125.985	17.6912	22.5945	23.5021
RchiOBHmChr1g0357031.gene	11.209	13.9674	15.0941	7.51643	4.77977	6.61266
RchiOBHmChr1g0357281.gene	0.138656	0.395736	0.509177	1.36637	1.20793	1.38556
RchiOBHmChr1g0357511.gene	0.512597	0.429456	0.305565	2.73193	2.7988	1.21796
RchiOBHmChr1g0357691.gene	0.618131	0.446653	0.621494	1.82279	2.66796	2.10294
RchiOBHmChr1g0357811.gene	2.41119	1.03765	1.46284	7.81858	8.90822	12.9831
RchiOBHmChr1g0358281.gene	38.495	51.4479	48.8163	5.37863	5.14645	5.60581
RchiOBHmChr1g0358291.gene	18.7492	24.7298	22.2348	5.44505	4.38223	4.09499
RchiOBHmChr1g0358421.gene	31.9017	41.1873	41.5938	3.40178	4.01915	6.40669
RchiOBHmChr1g0358441.gene	31.7258	36.2963	33.9397	18.353	17.0266	20.3652
RchiOBHmChr1g0358581.gene	4.43217	4.31556	6.3543	18.9497	25.7374	17.3933
RchiOBHmChr1g0358591.gene	3.57137	3.70677	3.47852	19.4663	15.4848	14.7237
RchiOBHmChr1g0358711.gene	7.93136	4.02446	2.8407	101.968	79.384	85.1773
RchiOBHmChr1g0358781.gene	55.2326	62.3597	63.1669	16.0973	11.331	18.0605
RchiOBHmChr1g0358871.gene	4.98165	5.34483	4.23167	1.94765	2.37366	2.92092
RchiOBHmChr1g0359181.gene	0.350455	0.296295	0.588046	1.6175	1.87959	1.35518
RchiOBHmChr1g0359241.gene	0.629449	0.448687	0.516928	1.46701	1.92335	1.87624
RchiOBHmChr1g0359311.gene	2.24905	1.3503	1.61462	5.76388	5.35479	5.00172
RchiOBHmChr1g0359431.gene	4.90662	4.80054	4.01919	21.2942	12.3601	17.2399
RchiOBHmChr1g0359441.gene	0.472263	0.462166	0.200906	1.34882	1.13531	1.432
RchiOBHmChr1g0359491.gene	0.89883	0.422733	0.493202	2.61308	2.32502	2.93251
RchiOBHmChr1g0359661.gene	42.951	44.1453	42.8032	11.9123	10.9045	13.4997
RchiOBHmChr1g0359741.gene	22.3141	26.3818	27.2041	12.9334	12.9612	8.65574
RchiOBHmChr1g0359831.gene	0	0.680295	0.606491	1.7693	1.20007	2.4122
RchiOBHmChr1g0360021.gene	19.6093	18.4399	18.626	8.61925	12.5152	10.2022
RchiOBHmChr1g0360071.gene	3.53131	3.44925	2.47233	12.8112	12.1438	10.6205
RchiOBHmChr1g0360171.gene	1.77491	1.27039	1.12981	3.69234	4.26825	3.52482
RchiOBHmChr1g0360301.gene	70.3322	62.3959	104.982	1.23206	4.85197	4.47766
RchiOBHmChr1g0360461.gene	13.8665	13.7543	11.9773	5.45431	3.58061	5.10732
RchiOBHmChr1g0360621.gene	1.62065	0.994102	1.19272	8.95622	7.57235	5.92473
RchiOBHmChr1g0360641.gene	46.1592	45.7111	40.3477	11.8961	11.5555	8.59787
RchiOBHmChr1g0360721.gene	2256.57	2786.65	2332.05	582.565	557.551	496.337
RchiOBHmChr1g0360801.gene	33.3321	30.2906	33.2572	14.932	18.486	10.7284
RchiOBHmChr1g0361041.gene	3.29708	4.29136	4.75688	2.07619	1.10823	2.22019
RchiOBHmChr1g0361121.gene	7.29282	8.83148	7.53771	20.5583	22.4847	18.2863
RchiOBHmChr1g0361151.gene	2.73705	4.0315	5.58037	0.645913	1.17941	0.55396
RchiOBHmChr1g0361201.gene	1.76334	0.282148	0.889365	45.9115	30.3303	35.0322
RchiOBHmChr1g0361301.gene	57.294	65.8697	73.1914	8.42024	10.5926	15.1447
RchiOBHmChr1g0361661.gene	1.80351	1.76627	2.11931	14.0065	8.88308	5.92363
RchiOBHmChr1g0361861.gene	172.419	140.663	147.563	68.1611	64.25	95.9552
RchiOBHmChr1g0361941.gene	1.23155	0.884959	0.68946	3.11472	3.46151	3.08258
RchiOBHmChr1g0362171.gene	17.8729	20.1308	18.8964	1.62919	1.73547	3.68925
RchiOBHmChr1g0362211.gene	9.90939	11.0741	11.2394	49.3332	20.7628	48.3594
RchiOBHmChr1g0362401.gene	10.8578	12.3516	13.3452	6.75368	6.97345	5.98077
RchiOBHmChr1g0362441.gene	44.026	46.8655	47.8547	25.8308	22.6522	21.4593
RchiOBHmChr1g0362601.gene	3.62332	4.40245	3.81266	10.945	9.51074	11.4683
RchiOBHmChr1g0362761.gene	9.76213	10.7393	10.9412	0.430178	1.09047	1.36114
RchiOBHmChr1g0362811.gene	59.9488	64.0073	74.268	29.3987	27.6432	27.9691
RchiOBHmChr1g0362841.gene	15.6914	14.9632	17.3888	7.24987	8.3389	10.1852
RchiOBHmChr1g0362951.gene	6.87976	5.9315	5.65984	14.8277	17.8391	19.2641
RchiOBHmChr1g0363211.gene	6.62069	5.51125	6.06024	1.09557	1.30357	1.88902
RchiOBHmChr1g0363361.gene	3180.92	3508.41	3317.49	639.932	893.382	999.234
RchiOBHmChr1g0363391.gene	5.4077	3.9539	7.73206	0.156297	0.679235	0.597052
RchiOBHmChr1g0363401.gene	0.760539	0.413053	0.501788	4.34655	5.45407	3.53644
RchiOBHmChr1g0363461.gene	2.962	3.44153	3.64523	1.46	1.44906	0.638805
RchiOBHmChr1g0363641.gene	6.47213	5.87413	6.67335	50.1071	39.3451	21.5899
RchiOBHmChr1g0363801.gene	23.4838	24.2998	26.6589	13.6815	9.34289	11.1128
RchiOBHmChr1g0363811.gene	38.9334	33.8038	35.1572	15.0212	8.37082	17.5048
RchiOBHmChr1g0364081.gene	38.341	25.2965	16.4608	176.814	126.046	172.534
RchiOBHmChr1g0364141.gene	1.17663	0.95733	1.37102	6.84415	4.58748	3.29166
RchiOBHmChr1g0364201.gene	10.3069	6.36597	9.55468	0.526211	0.475589	1.07783
RchiOBHmChr1g0364231.gene	4.59551	3.31941	3.55116	9.11501	8.04929	11.2984
RchiOBHmChr1g0364341.gene	7.23304	7.36597	9.12439	3.08102	4.60271	5.98816
RchiOBHmChr1g0364481.gene	11.6743	8.26415	6.82872	51.4942	44.3227	58.1721
RchiOBHmChr1g0364501.gene	1.86595	1.80951	1.54584	14.0635	15.1711	14.9814
RchiOBHmChr1g0364671.gene	13.7382	14.14	14.5537	5.70556	5.73792	8.95342
RchiOBHmChr1g0364701.gene	0.709941	0.5044	0.629482	4.21531	3.9527	2.41897
RchiOBHmChr1g0365071.gene	3.04653	1.86212	1.5252	18.4241	15.0142	7.72599
RchiOBHmChr1g0365751.gene	1.13071	1.05315	0.97549	13.0765	9.43509	8.23827
RchiOBHmChr1g0365771.gene	0.337925	0.377386	0.379788	4.63486	3.23778	4.6648
RchiOBHmChr1g0365881.gene	0.496468	1.00538	1.17452	12.1532	7.04527	11.3785
RchiOBHmChr1g0365911.gene	4.56138	2.87241	2.51653	6.26277	11.1479	10.5948
RchiOBHmChr1g0366211.gene	1.32473	0.540007	0.401728	1.83016	1.74443	4.10123
RchiOBHmChr1g0366461.gene	1.82749	1.18494	0.942886	7.19564	6.54018	6.10712
RchiOBHmChr1g0366821.gene	0.607713	0.701395	0.391503	2.28159	1.83918	2.60971
RchiOBHmChr1g0367221.gene	1.67673	5.72725	10.3099	20.6226	25.1252	23.3245
RchiOBHmChr1g0367261.gene	1.04371	0.064444	1.01732	3.60447	3.13792	2.56585
RchiOBHmChr1g0367271.gene	0.08896	0.579454	0.083745	1.40087	2.56045	2.45318
RchiOBHmChr1g0367351.gene	1.32801	0.598069	1.33667	3.84936	2.22491	3.14206
RchiOBHmChr1g0367531.gene	3.61762	3.68933	3.29554	0.565234	0.761769	0.32347
RchiOBHmChr1g0367691.gene	39.2569	47.8008	49.8573	1.66894	3.41186	2.35316
RchiOBHmChr1g0367791.gene	0.261627	0.161913	0.222097	3.91871	1.77142	2.90609
RchiOBHmChr1g0367881.gene	2.18236	2.54858	2.79896	12.0947	12.336	10.0653
RchiOBHmChr1g0367921.gene	16.8729	13.7765	14.4751	6.0679	7.55245	6.88055
RchiOBHmChr1g0367971.gene	3.48807	4.05907	3.96097	20.3627	21.7407	20.2812
RchiOBHmChr1g0368061.gene	45.4885	50.4144	51.7887	28.7871	30.7404	27.4713
RchiOBHmChr1g0368091.gene	30.0225	29.2807	24.7252	127.728	125.329	118.549
RchiOBHmChr1g0368311.gene	1.66596	1.66016	1.63529	6.02335	5.36412	4.19635
RchiOBHmChr1g0368491.gene	0.898909	1.17758	0.872098	0.102421	0.167891	0.222869
RchiOBHmChr1g0368541.gene	306.632	353.805	350.115	103.883	108.09	95.796
RchiOBHmChr1g0368631.gene	1.85385	0.734602	1.1078	6.22026	6.23676	2.68089
RchiOBHmChr1g0368821.gene	30.0527	29.6868	28.5486	7.25609	7.16483	11.7998
RchiOBHmChr1g0368921.gene	159.084	162.106	154.629	7.67302	10.9431	7.3085
RchiOBHmChr1g0368991.gene	1436.7	1360.15	1426.18	19.8608	56.4897	38.3214
RchiOBHmChr1g0369251.gene	20.6491	18.1773	20.0587	0.177961	0.8955	0.719936
RchiOBHmChr1g0369271.gene	1.86083	2.26423	1.58016	12.4455	12.5349	11.2587
RchiOBHmChr1g0369301.gene	14.2198	12.469	11.7742	82.5425	73.0709	62.5947
RchiOBHmChr1g0369441.gene	1.26172	1.08901	0.485079	4.65477	2.17183	3.23667
RchiOBHmChr1g0369541.gene	2503.12	3041.09	2972.46	541.118	548.534	715.409
RchiOBHmChr1g0369571.gene	10.4328	10.7423	12.2573	5.23337	5.98738	6.76084
RchiOBHmChr1g0369791.gene	2.21052	2.22056	2.62918	8.60144	6.88983	6.71025
RchiOBHmChr1g0369921.gene	10.1867	5.95457	4.61439	2.03204	2.82396	1.85462
RchiOBHmChr1g0370001.gene	57.1873	59.5635	64.8903	39.8565	33.2631	35.0694
RchiOBHmChr1g0370011.gene	6.70055	6.18561	6.95331	45.4399	31.0408	34.476
RchiOBHmChr1g0370421.gene	15.3441	14.5336	16.7953	105.329	78.081	40.1383
RchiOBHmChr1g0370551.gene	7.66064	7.90575	7.78437	28.8297	25.3923	28.6956
RchiOBHmChr1g0370561.gene	14.1991	12.859	12.7269	34.354	30.5716	33.8509
RchiOBHmChr1g0370751.gene	0.313027	0.262326	0.456232	2.18083	0.963569	1.42031
RchiOBHmChr1g0370781.gene	0.664213	0.588459	0.559503	2.35883	1.98786	1.85069
RchiOBHmChr1g0370831.gene	5.98475	3.999	5.14077	23.6098	23.1384	16.3582
RchiOBHmChr1g0371171.gene	2.94069	2.88713	3.06319	1.40629	1.09441	1.08711
RchiOBHmChr1g0371261.gene	0.205021	0	0.074429	1.16454	0.58004	1.21872
RchiOBHmChr1g0371561.gene	10.2064	8.7215	6.36517	4.92826	6.03501	2.54291
RchiOBHmChr1g0371621.gene	21.8138	17.7688	21.3525	138.762	91.4628	129.098
RchiOBHmChr1g0371751.gene	32.3751	32.4003	34.45	21.5019	18.0454	20.088
RchiOBHmChr1g0372181.gene	2.46591	1.96067	2.33658	11.8944	6.08829	7.69701
RchiOBHmChr1g0372371.gene	2.95795	2.80968	2.55682	8.2224	7.31178	6.91198
RchiOBHmChr1g0372441.gene	6.14709	4.17799	4.63368	23.4602	17.8382	14.1862
RchiOBHmChr1g0372481.gene	11.2504	7.74778	6.78069	25.5095	35.3617	28.114
RchiOBHmChr1g0372621.gene	10.9024	13.1863	8.65129	34.4854	38.1404	25.7082
RchiOBHmChr1g0372641.gene	2.34366	3.40776	2.64126	0.661213	1.14877	0.949795
RchiOBHmChr1g0372691.gene	30.2827	31.2075	29.8573	175.466	167.347	110.258
RchiOBHmChr1g0372781.gene	1.23494	1.14875	1.63997	4.0077	3.12381	3.70007
RchiOBHmChr1g0372871.gene	5.22948	2.35485	2.32793	18.4981	14.809	8.75947
RchiOBHmChr1g0373081.gene	0.022889	0.142677	0.19602	0.407427	0.792574	1.34658
RchiOBHmChr1g0373091.gene	1.77838	2.19329	1.92194	8.29456	6.13279	3.82397
RchiOBHmChr1g0373101.gene	0.037984	0.038543	0.165415	4.06556	3.27946	3.64522
RchiOBHmChr1g0373211.gene	12.8338	12.9145	12.0554	33.1608	34.8802	29.2304
RchiOBHmChr1g0373321.gene	27.5656	32.0264	30.2319	19.6371	17.3768	15.6167
RchiOBHmChr1g0373381.gene	2.10113	2.37132	2.8342	1.12032	0.759418	1.2501
RchiOBHmChr1g0373391.gene	85.7873	77.8551	81.4813	27.3997	28.4292	22.236
RchiOBHmChr1g0373501.gene	0	0	0	6.07859	2.34941	2.57751
RchiOBHmChr1g0373621.gene	6.53322	5.26524	3.96062	18.337	16.1092	13.4744
RchiOBHmChr1g0374081.gene	1.43974	1.36342	1.31797	7.01992	5.43368	5.50085
RchiOBHmChr1g0374141.gene	1.53649	1.82851	1.91455	3.95286	4.96915	4.32329
RchiOBHmChr1g0374201.gene	1.32388	1.50609	1.64363	4.68791	5.81345	4.81011
RchiOBHmChr1g0374491.gene	26.6621	28.0646	31.0706	14.5681	15.7984	14.393
RchiOBHmChr1g0374511.gene	257.657	356.931	400.867	96.5482	81.1753	88.1674
RchiOBHmChr1g0374521.gene	14.8862	9.96013	10.7507	40.2277	46.4888	66.2952
RchiOBHmChr1g0375091.gene	29.9279	31.6727	30.9375	78.4266	85.7495	68.4226
RchiOBHmChr1g0375101.gene	22.2773	20.2613	17.8826	49.1328	61.2323	56.6683
RchiOBHmChr1g0375141.gene	3.27857	3.85782	3.88768	15.3355	14.2647	11.9155
RchiOBHmChr1g0375231.gene	1.13403	1.19384	1.03245	5.67028	4.29383	3.89552
RchiOBHmChr1g0375831.gene	31.1119	23.9194	19.1048	108.206	97.3469	104.592
RchiOBHmChr1g0375841.gene	4.17328	3.08498	2.24686	11.5406	12.8433	11.419
RchiOBHmChr1g0375971.gene	0.359533	0.272257	0.28594	1.30627	0.55264	0.921263
RchiOBHmChr1g0376161.gene	1.09157	1.36363	1.33822	0.432871	0.214429	0.389892
RchiOBHmChr1g0376601.gene	10.0567	10.8555	9.91166	5.62562	5.74252	4.79752
RchiOBHmChr1g0376651.gene	0.45006	0.514522	0.30245	2.72092	3.42533	2.8839
RchiOBHmChr1g0376711.gene	1.11444	1.16855	1.34768	7.98765	4.52269	4.68921
RchiOBHmChr1g0376791.gene	4.26231	4.47122	4.69327	0.932308	1.10343	0.834212
RchiOBHmChr1g0376831.gene	6.55479	6.31066	6.22952	23.2451	25.1105	22.1945
RchiOBHmChr1g0376881.gene	1.28408	0.764541	0.399165	2.74349	2.42386	2.3821
RchiOBHmChr1g0376891.gene	4.18898	2.1493	2.57061	0.740701	0.371806	0.718272
RchiOBHmChr1g0377161.gene	4.93989	6.88461	8.91381	1.00218	1.81936	3.08819
RchiOBHmChr1g0377221.gene	41.7828	54.887	38.576	20.148	27.395	21.7253
RchiOBHmChr1g0377231.gene	133.413	111.833	131.657	60.8094	54.8141	56.8687
RchiOBHmChr1g0377241.gene	43.6202	42.1483	45.4249	25.1958	24.987	23.1379
RchiOBHmChr1g0377351.gene	87.2258	76.8315	77.763	41.2209	54.4497	45.7372
RchiOBHmChr1g0377551.gene	5.00819	3.48999	4.57372	32.4799	21.8119	32.2346
RchiOBHmChr1g0377631.gene	9.19745	11.9768	17.051	1.65315	1.83471	0.792533
RchiOBHmChr1g0377651.gene	57.5366	53.701	52.3194	31.0142	26.2989	32.8066
RchiOBHmChr1g0377791.gene	0.855038	1.02382	1.1074	7.01811	5.59506	6.2127
RchiOBHmChr1g0377841.gene	3.28405	2.52008	1.69928	17.8487	16.9078	17.1602
RchiOBHmChr1g0377861.gene	2.27971	1.48023	1.07098	9.281	8.66106	11.346
RchiOBHmChr1g0377941.gene	3.0564	1.41449	1.1612	5.15903	5.88184	4.58548
RchiOBHmChr1g0377951.gene	0.777344	0.880574	0.671888	2.59559	3.06961	1.49902
RchiOBHmChr1g0378221.gene	1.22168	1.6983	1.93251	8.14918	4.35482	6.12469
RchiOBHmChr1g0378391.gene	3.24295	2.77396	3.98258	0.598228	0.737219	0.465041
RchiOBHmChr1g0378421.gene	0.522405	0.883392	0.748054	3.31577	2.76659	1.84937
RchiOBHmChr1g0378461.gene	22.855	18.3763	17.6079	79.2442	87.0432	55.9956
RchiOBHmChr1g0378471.gene	0.205482	0.656875	0.318809	3.28667	2.54011	2.23552
RchiOBHmChr1g0378551.gene	3.53068	3.32022	2.4269	7.93155	8.32366	8.58294
RchiOBHmChr1g0378561.gene	16.3312	15.0478	16.6228	10.0875	9.51786	9.38237
RchiOBHmChr1g0378941.gene	27.1583	35.0146	29.1945	8.23148	7.49111	7.70463
RchiOBHmChr1g0379541.gene	46.5904	44.7077	46.9503	18.5143	17.9167	17.8481
RchiOBHmChr1g0379571.gene	0.190643	0.119856	0.112713	1.50387	0.930466	0.856482
RchiOBHmChr1g0379851.gene	1.16577	1.40457	1.46365	4.1781	5.67756	5.21512
RchiOBHmChr1g0379911.gene	0.561364	0.587663	0.713789	1.93714	1.83024	2.26351
RchiOBHmChr1g0379981.gene	4.19246	4.43736	3.16121	16.4265	11.0844	14.6509
RchiOBHmChr1g0380131.gene	11.0898	11.9646	11.9604	3.97559	6.36123	7.9864
RchiOBHmChr1g0380161.gene	0.180672	0.357581	0.140357	0.951841	0.927001	0.894843
RchiOBHmChr1g0380201.gene	14.71	14.6356	14.5629	2.28292	3.5749	4.92014
RchiOBHmChr1g0380221.gene	0.333647	0.335534	0.291252	1.64624	1.45266	1.41745
RchiOBHmChr1g0380301.gene	6.16859	16.2795	11.4602	36.7791	36.8949	30.5382
RchiOBHmChr1g0380441.gene	22.1269	23.232	24.2241	12.4156	12.4491	10.8192
RchiOBHmChr1g0380521.gene	13.0212	10.5886	13.3807	2.90319	4.77789	2.59551
RchiOBHmChr1g0380531.gene	0.54709	0.928294	0.674005	3.02969	2.54708	2.44033
RchiOBHmChr1g0380701.gene	65.035	68.5416	68.0013	31.6748	33.7825	32.6711
RchiOBHmChr1g0380721.gene	63.7362	60.39	50.1359	21.182	20.274	23.5012
RchiOBHmChr1g0380731.gene	1419.25	1612.51	1522.54	706.348	684.273	634.214
RchiOBHmChr1g0380881.gene	13.8042	10.9124	9.22685	44.263	47.3556	29.5865
RchiOBHmChr1g0380911.gene	0.602165	0.189808	0.269973	6.13227	4.928	4.9068
RchiOBHmChr1g0381031.gene	2.05225	0.582486	0.827628	4.84536	3.97013	4.19474
RchiOBHmChr1g0381041.gene	9.32838	11.2606	8.26819	2.52427	4.57586	1.48523
RchiOBHmChr1g0381451.gene	7.22724	8.05595	7.79694	28.048	25.72	33.6446
RchiOBHmChr1g0381571.gene	1.89888	1.05479	2.46225	5.33408	4.48779	6.07802
RchiOBHmChr1g0381641.gene	2.81528	2.23935	2.19486	7.7454	5.57228	5.43018
RchiOBHmChr1g0381731.gene	11.5525	10.0217	11.1243	1.66276	3.91791	4.14604
RchiOBHmChr1g0381981.gene	16.5401	15.6169	26.7963	12.1157	10.946	5.91153
RchiOBHmChr1g0382411.gene	9.31172	8.20598	7.42907	24.9845	21.7336	21.4237
RchiOBHmChr1g0382431.gene	17.8819	12.1013	11.9589	132.4	84.094	98.7891
RchiOBHmChr1g0382761.gene	2.76369	3.98423	5.59212	0	0.498732	0.041076
RchiOBHmChr1g0382811.gene	43.193	28.6161	25.1267	1.48334	2.539	1.16101
RchiOBHmChr1g0382871.gene	6.30286	7.20184	8.28877	1.88565	3.8845	1.89006
RchiOBHmChr1g0382921.gene	0.815287	0.058162	0.116402	4.13684	2.89362	4.86641
RchiOBHmChr1g0383061.gene	8.82676	8.30609	8.56995	2.16949	3.74623	1.95738
RchiOBHmChr1g0383071.gene	108.886	142.142	162.427	10.2579	16.5481	15.3498
RchiOBHmChr1g0383151.gene	16.2382	21.8129	14.8233	6.37495	8.13203	5.50092
RchiOBHmChr1g0383171.gene	4.65642	3.9803	4.02846	10.1642	7.50533	10.2226
RchiOBHmChr1g0383191.gene	18.1473	17.1184	15.1807	7.35959	10.2806	12.7266
RchiOBHmChr1g0383261.gene	3.96145	5.39406	5.75553	0.310883	0.774133	0.202378
RchiOBHmChr1g0383771.gene	8.64732	9.28654	10.472	25.497	22.988	22.7004
RchiOBHmChr1g0383831.gene	0.562646	1.06372	1.27831	4.39075	4.35635	3.05284
RchiOBHmChr1g0383881.gene	1.6281	1.88853	1.66325	16.0518	22.4758	15.3638
RchiOBHmChr1g0383891.gene	1.04213	1.26051	1.46973	5.22771	4.3717	4.91697
RchiOBHmChr1g0383931.gene	12.9271	11.4225	15.7989	5.09569	4.60616	8.00416
RchiOBHmChr1g0383971.gene	8.31821	6.33515	6.33048	19.5224	15.8531	19.7922
RchiOBHmChr1g0384111.gene	3.75923	4.26856	4.05419	11.631	10.0218	11.8963
RchiOBHmChr1g0384451.gene	28.364	28.7008	26.5307	12.046	18.6867	0.004025
RchiOBHmChr1g0384631.gene	5.47116	4.55671	4.07392	13.8164	10.0793	12.6331
RchiOBHmChr2g0084441.gene	2.34776	2.02838	2.36363	8.82312	4.77101	5.42508
RchiOBHmChr2g0084491.gene	3.03238	2.23285	3.38989	12.8079	11.7068	10.5645
RchiOBHmChr2g0084561.gene	0	0.15906	0.129862	1.52166	0.693597	0.810051
RchiOBHmChr2g0084721.gene	6.75766	6.2066	5.87658	29.2593	30.7866	32.2269
RchiOBHmChr2g0084731.gene	2.54618	2.40142	2.12495	7.4599	6.95008	6.41301
RchiOBHmChr2g0084791.gene	22.9411	19.4471	18.8529	54.5231	60.053	65.0332
RchiOBHmChr2g0084841.gene	5.66844	6.82514	9.94138	0.175485	0.262061	0.228606
RchiOBHmChr2g0084851.gene	2.19111	2.97055	2.36757	6.87151	7.01255	4.82525
RchiOBHmChr2g0084921.gene	2.00245	1.38972	1.79998	7.41209	5.26785	5.88247
RchiOBHmChr2g0085171.gene	3.25098	2.86532	3.05832	14.1427	10.7382	12.5155
RchiOBHmChr2g0085301.gene	6.22804	7.7393	7.61843	4.15571	3.73392	3.30223
RchiOBHmChr2g0085581.gene	85.1786	90.3002	93.2636	42.7343	44.3921	43.0561
RchiOBHmChr2g0085701.gene	2.53482	1.86478	2.67044	10.8712	10.7327	11.8254
RchiOBHmChr2g0085711.gene	2.43332	2.48239	2.39445	8.6546	6.46793	6.10457
RchiOBHmChr2g0085731.gene	0.282227	0.355524	0.382115	1.71734	1.68698	1.67149
RchiOBHmChr2g0086051.gene	61.8723	46.4501	47.5296	156.561	131.906	115.13
RchiOBHmChr2g0086071.gene	1.24652	2.16911	1.54392	0.55163	0.451726	0.566901
RchiOBHmChr2g0086401.gene	2.24681	1.68184	1.76532	5.82535	6.21526	4.57173
RchiOBHmChr2g0086421.gene	1.74388	1.72027	2.69673	8.49976	7.36495	9.03125
RchiOBHmChr2g0086441.gene	1.45563	1.60474	1.69877	4.89566	5.49745	3.41479
RchiOBHmChr2g0086661.gene	21.3603	15.301	15.5438	68.1251	78.4712	59.6546
RchiOBHmChr2g0086711.gene	28.6821	24.218	23.6193	66.1124	65.5854	55.6036
RchiOBHmChr2g0086721.gene	0.801043	0.911071	0.868009	8.30283	8.85385	8.00922
RchiOBHmChr2g0086761.gene	10.0993	6.39647	10.4552	37.2427	27.7888	22.6269
RchiOBHmChr2g0086781.gene	22.0492	18.9474	20.5563	8.53511	9.7022	13.5964
RchiOBHmChr2g0086811.gene	22.921	19.1877	26.5279	8.71244	10.4904	10.8496
RchiOBHmChr2g0086841.gene	0.538102	0.25061	0.095797	2.00947	1.24493	1.81756
RchiOBHmChr2g0086911.gene	1.32236	1.55187	1.78329	0.088593	0.151244	0.530399
RchiOBHmChr2g0086921.gene	3.01402	2.40944	2.54089	1.02019	1.23542	0.811205
RchiOBHmChr2g0086971.gene	64.862	82.1432	91.8159	35.0844	30.4902	43.9978
RchiOBHmChr2g0087071.gene	9.44929	9.98255	9.63159	5.90153	5.19365	6.41584
RchiOBHmChr2g0087161.gene	8.22115	7.89236	9.21927	4.80913	4.63709	5.09978
RchiOBHmChr2g0087261.gene	1.88825	2.42662	2.62044	20.5542	17.4187	11.1381
RchiOBHmChr2g0087371.gene	0.223248	0.355401	0.280014	3.19477	2.35512	1.73986
RchiOBHmChr2g0087601.gene	31.2813	21.5332	26.5066	13.7002	14.0254	12.7459
RchiOBHmChr2g0087701.gene	8.51619	6.87161	8.23441	52.0372	34.0287	19.8734
RchiOBHmChr2g0087991.gene	0.652261	0.9905	1.81324	3.81036	4.19835	4.64786
RchiOBHmChr2g0088011.gene	140.414	170.359	127.365	339.157	347.677	408.525
RchiOBHmChr2g0088171.gene	48.3602	33.1015	40.6069	17.2365	15.5123	21.5785
RchiOBHmChr2g0088191.gene	68.5676	73.5817	58.8	23.1787	19.7534	30.0343
RchiOBHmChr2g0088211.gene	374.92	205.041	222.792	105.917	140.68	136.888
RchiOBHmChr2g0088241.gene	1.63132	2.90006	2.41648	8.78018	7.88466	7.51084
RchiOBHmChr2g0088401.gene	14.8428	13.9949	13.8766	55.7412	44.4041	48.0055
RchiOBHmChr2g0088551.gene	0.890981	0.328267	0.863544	3.75681	5.21503	3.26841
RchiOBHmChr2g0089041.gene	14.0993	15.8567	15.134	8.33641	8.86427	8.97574
RchiOBHmChr2g0089051.gene	6.39846	8.2061	7.59623	3.77999	3.82781	3.93379
RchiOBHmChr2g0089141.gene	2.35002	2.45645	1.69078	6.09309	5.08579	5.59331
RchiOBHmChr2g0089381.gene	8.27717	8.73732	9.04279	2.13645	1.51593	2.07164
RchiOBHmChr2g0089401.gene	43.1603	39.3013	37.724	16.3239	15.6336	24.6646
RchiOBHmChr2g0089411.gene	214.188	209.03	186.923	50.0113	56.6176	55.2259
RchiOBHmChr2g0089421.gene	1.4403	0.909198	0.965579	2.75389	4.12645	3.90231
RchiOBHmChr2g0089451.gene	4.4086	1.94774	1.84861	19.5412	14.6489	22.8742
RchiOBHmChr2g0089571.gene	70.7328	86.9466	76.7535	33.7935	38.1548	39.9263
RchiOBHmChr2g0089601.gene	16.6675	15.2328	15.3647	10.2846	8.22807	7.80427
RchiOBHmChr2g0089661.gene	6.47252	5.25945	5.74317	17.7794	16.4776	15.1117
RchiOBHmChr2g0089801.gene	12.9873	12.185	14.8269	0.952123	1.47174	3.42227
RchiOBHmChr2g0089811.gene	150.134	149.39	142.348	69.4999	70.7365	66.964
RchiOBHmChr2g0090021.gene	0.916489	1.12652	0.661283	4.18644	3.71635	3.34025
RchiOBHmChr2g0090071.gene	11.2236	8.65494	6.95574	45.4402	38.3838	30.1658
RchiOBHmChr2g0090181.gene	20.9419	16.1123	16.0603	41.0943	54.6323	44.2586
RchiOBHmChr2g0090251.gene	1.97226	1.62277	1.54022	4.32792	4.01465	5.97907
RchiOBHmChr2g0090351.gene	7.76166	6.05885	6.65002	2.45024	3.4671	1.81511
RchiOBHmChr2g0090371.gene	0.224462	0.117101	0.11646	1.96794	1.4285	1.66859
RchiOBHmChr2g0090421.gene	0.615219	0.713487	0.27352	2.48891	3.99866	3.2418
RchiOBHmChr2g0090441.gene	15.5146	16.517	13.9304	7.75993	11.955	7.7113
RchiOBHmChr2g0090451.gene	3.25365	3.49055	4.15919	14.9896	13.8271	13.8968
RchiOBHmChr2g0090561.gene	29.0293	22.0944	18.0706	153.733	116.408	169.253
RchiOBHmChr2g0090721.gene	0.979004	1.35464	1.61505	0.068566	0.451051	0.246028
RchiOBHmChr2g0090861.gene	21.244	25.9278	31.3221	2.55585	2.73901	1.98523
RchiOBHmChr2g0090941.gene	4.05279	3.55427	3.71679	9.50518	8.47215	10.2119
RchiOBHmChr2g0091011.gene	2.03131	2.25099	2.13975	13.0576	10.1073	11.6062
RchiOBHmChr2g0091021.gene	2.77418	1.23303	2.25713	46.0137	21.3969	29.6911
RchiOBHmChr2g0091041.gene	14.3409	15.5345	18.0446	6.67748	6.79477	6.96521
RchiOBHmChr2g0091101.gene	0.685762	0.536764	0.92782	5.26902	5.08423	4.87907
RchiOBHmChr2g0091151.gene	0.934893	0.898008	0.996112	5.06442	5.14239	5.7597
RchiOBHmChr2g0091201.gene	0.950147	0.470603	0.387153	1.45275	1.83079	2.13222
RchiOBHmChr2g0091231.gene	5.21806	4.3415	4.15294	16.0026	19.7934	22.1261
RchiOBHmChr2g0091281.gene	12.307	16.2912	16.8984	41.5082	38.6839	36.4285
RchiOBHmChr2g0091391.gene	16.2204	16.1654	17.96	3.70594	6.70853	4.83056
RchiOBHmChr2g0091451.gene	0.882235	1.04628	1.42636	5.48919	4.37581	2.66749
RchiOBHmChr2g0091551.gene	17.4278	14.8094	20.2435	6.46669	6.85976	16.0472
RchiOBHmChr2g0091631.gene	42.3916	48.1469	40.3974	23.5471	21.0991	14.9684
RchiOBHmChr2g0091681.gene	1.58536	1.76419	1.0836	8.18169	5.95828	6.31113
RchiOBHmChr2g0091741.gene	85.7802	73.001	73.2192	331.427	288.773	300.535
RchiOBHmChr2g0091861.gene	50.1688	50.4304	57.789	23.9773	15.6471	21.9747
RchiOBHmChr2g0091911.gene	2.92338	2.5599	2.57922	9.43933	9.55724	7.41509
RchiOBHmChr2g0091921.gene	0.0277	0.079199	0.420447	1.29254	1.9633	2.3148
RchiOBHmChr2g0091961.gene	4.1123	2.03441	2.28081	12.9526	16.3279	14.7474
RchiOBHmChr2g0091971.gene	190.731	208.919	196.557	105.226	121.3	107.553
RchiOBHmChr2g0092031.gene	1.74561	1.30075	1.08762	6.81541	9.93771	5.35827
RchiOBHmChr2g0092041.gene	2.42239	1.37801	2.40015	0	0.069281	0.068763
RchiOBHmChr2g0092051.gene	8.66025	7.43602	6.55292	25.7241	21.701	21.7348
RchiOBHmChr2g0092161.gene	1.28933	1.16226	1.59702	5.3159	5.22984	5.13104
RchiOBHmChr2g0092171.gene	0.369656	0.755236	0.247353	1.33345	1.06736	1.81748
RchiOBHmChr2g0092181.gene	2.12999	2.92709	2.64289	9.17744	8.98237	7.36423
RchiOBHmChr2g0092241.gene	22.94	24.0682	26.448	15.9237	10.9796	13.741
RchiOBHmChr2g0092251.gene	86.9999	93.7087	88.4104	53.6655	48.5957	51.6741
RchiOBHmChr2g0092281.gene	2.92014	3.11116	2.9235	2.19151	1.14498	2.24116
RchiOBHmChr2g0092571.gene	2.07859	1.78091	1.69808	7.1484	6.67271	6.21605
RchiOBHmChr2g0092971.gene	0.999415	0.921143	0.583639	2.30725	2.22235	3.1232
RchiOBHmChr2g0093051.gene	3.79943	4.18594	3.64385	13.4576	15.9027	18.9973
RchiOBHmChr2g0093101.gene	0.201818	0.310229	0.131744	0.797849	0.875799	0.680086
RchiOBHmChr2g0093121.gene	2.44012	2.38028	2.16745	8.36446	6.28465	7.32227
RchiOBHmChr2g0093131.gene	17.5075	14.3236	10.6581	42.7853	48.8816	48.8773
RchiOBHmChr2g0093251.gene	0.459575	0.386417	0.33693	1.64487	1.5985	1.54571
RchiOBHmChr2g0093331.gene	4.43248	5.27357	4.64963	2.25223	1.57684	2.05604
RchiOBHmChr2g0093381.gene	0.607043	0.390702	0.434298	2.73774	2.62284	2.7318
RchiOBHmChr2g0093491.gene	0.345773	0.477709	0.35876	14.0013	11.2352	10.2176
RchiOBHmChr2g0093551.gene	5.89059	4.63327	0.269056	12.283	17.0947	16.0564
RchiOBHmChr2g0093621.gene	2.45003	1.68882	2.33122	7.75983	4.90245	4.92821
RchiOBHmChr2g0093671.gene	0.350633	0.215783	0.157346	2.40195	2.60169	1.8209
RchiOBHmChr2g0093831.gene	0.392942	0.243117	0.231563	9.14969	7.61714	8.20074
RchiOBHmChr2g0094071.gene	0.432702	0.413896	0.487912	1.60505	1.57056	1.11998
RchiOBHmChr2g0094141.gene	0.358552	0.162357	0.159225	1.32241	1.16207	1.27235
RchiOBHmChr2g0094211.gene	6.30422	6.22534	5.99884	20.577	17.9637	12.8062
RchiOBHmChr2g0094231.gene	6.04828	5.60023	4.98815	16.7464	13.6619	13.8104
RchiOBHmChr2g0094331.gene	1.06863	0.966417	0.74451	4.75226	5.07928	3.40213
RchiOBHmChr2g0094341.gene	3.95309	3.1666	3.95994	50.8672	34.4449	28.0151
RchiOBHmChr2g0094451.gene	0.065955	0	0.104893	2.27259	1.68893	1.12409
RchiOBHmChr2g0094541.gene	4.46022	4.46544	3.63886	1.99225	2.05023	2.26766
RchiOBHmChr2g0094741.gene	6.34565	3.59661	3.24937	123.242	133.369	106.395
RchiOBHmChr2g0094781.gene	5.49918	5.15861	6.26152	1.5841	2.8607	2.81646
RchiOBHmChr2g0094891.gene	0.693539	1.34165	0.79112	7.90115	8.58934	7.6315
RchiOBHmChr2g0095161.gene	0.308019	0.076944	0.117895	2.07196	2.0201	0.979668
RchiOBHmChr2g0095331.gene	13.7635	13.0234	13.1213	2.85432	5.74804	3.10839
RchiOBHmChr2g0095461.gene	0.645474	0.392077	0.532011	9.87463	8.35204	7.94897
RchiOBHmChr2g0095521.gene	77.0478	88.1521	96.3208	48.2265	45.223	47.2617
RchiOBHmChr2g0095531.gene	26.1754	33.7023	33.8923	18.2339	20.0216	20.2195
RchiOBHmChr2g0095551.gene	143.127	162.06	166.817	57.6187	55.4358	58.609
RchiOBHmChr2g0095761.gene	10.1156	10.49	9.56836	5.24179	6.13837	6.42053
RchiOBHmChr2g0095781.gene	8.20587	9.04295	10.5794	25.0035	22.1261	26.2257
RchiOBHmChr2g0095851.gene	9.96251	11.1964	11.6866	2.58433	3.18895	3.74832
RchiOBHmChr2g0095881.gene	145.741	141.707	166.163	40.4087	44.4492	55.9789
RchiOBHmChr2g0095931.gene	0.762663	1.17818	0.951079	2.86144	2.93003	2.61382
RchiOBHmChr2g0096331.gene	1.19783	0.501007	0.701099	7.54056	7.6065	3.72041
RchiOBHmChr2g0096371.gene	3.77005	1.95012	3.61068	24.0752	25.6181	12.5965
RchiOBHmChr2g0096501.gene	1.04696	1.41651	0.957561	0.24597	0.22565	0.211813
RchiOBHmChr2g0096531.gene	90.3689	118.569	95.0174	34.5406	45.9607	27.8452
RchiOBHmChr2g0096601.gene	24.5135	26.9078	27.8114	13.7345	14.2886	13.6043
RchiOBHmChr2g0096661.gene	143.772	138.887	153.464	53.8738	54.7203	53.8362
RchiOBHmChr2g0096691.gene	82.6292	86.9309	100.801	30.8584	29.4473	33.075
RchiOBHmChr2g0096861.gene	11.1669	10.5296	11.654	8.80245	5.60936	6.1014
RchiOBHmChr2g0097121.gene	4.12927	3.59687	2.82666	17.8463	18.2059	15.8772
RchiOBHmChr2g0097361.gene	1.57204	1.52626	1.67966	10.7117	9.51179	15.7714
RchiOBHmChr2g0097421.gene	1.10236	1.42101	0.894708	4.78915	6.22754	4.75648
RchiOBHmChr2g0097461.gene	20.4632	26.9465	14.1011	14.5269	11.3259	6.87243
RchiOBHmChr2g0097521.gene	0.231236	0.223285	1.11759	3.6039	2.08873	4.13073
RchiOBHmChr2g0097591.gene	31.4396	37.767	35.2107	12.2364	11.9092	10.7482
RchiOBHmChr2g0097601.gene	15.0703	17.4923	18.3798	5.99211	7.10723	4.80959
RchiOBHmChr2g0097641.gene	14.5282	9.27397	9.67592	26.2032	24.445	34.1255
RchiOBHmChr2g0097671.gene	38.2947	29.9261	27.0714	99.3035	97.832	99.5855
RchiOBHmChr2g0097911.gene	2.05137	2.0153	2.24478	10.2854	12.3091	11.0591
RchiOBHmChr2g0098191.gene	1.70426	1.044	0.699781	12.4929	12.3475	8.93627
RchiOBHmChr2g0098351.gene	11.7013	11.7796	12.0539	7.59581	7.68843	6.2483
RchiOBHmChr2g0098531.gene	3.29852	0.432636	3.23596	9.89312	7.29197	10.9772
RchiOBHmChr2g0098631.gene	4.35875	4.00951	4.87708	17.9801	18.067	18.7084
RchiOBHmChr2g0099121.gene	1.20619	1.61705	1.95996	11.5836	12.4515	10.1315
RchiOBHmChr2g0099171.gene	3.88054	3.72379	3.70193	11.614	9.30393	7.87535
RchiOBHmChr2g0099331.gene	31.4953	31.7748	34.7543	119.347	110.126	104.125
RchiOBHmChr2g0099451.gene	2.43301	2.1302	3.88006	9.75416	13.2616	8.73545
RchiOBHmChr2g0099581.gene	55.2486	59.3788	65.4994	34.1011	37.059	35.9142
RchiOBHmChr2g0099751.gene	49.6491	60.7587	29.3815	337.672	381.143	172.834
RchiOBHmChr2g0099771.gene	32.3719	37.4617	35.2866	4.54021	4.92947	4.54214
RchiOBHmChr2g0099981.gene	27.2686	21.2115	23.5654	5.33049	8.15226	10.0268
RchiOBHmChr2g0100331.gene	7.35337	5.73458	5.87366	23.4929	24.9785	16.7595
RchiOBHmChr2g0100521.gene	8.47264	5.72378	10.4055	0.323912	1.34067	0.76759
RchiOBHmChr2g0100551.gene	80.2558	50.9039	62.8244	9.77653	30.8688	26.8649
RchiOBHmChr2g0100691.gene	3.49931	3.17648	3.4584	8.13566	13.7036	8.35983
RchiOBHmChr2g0100701.gene	1.25634	1.56206	1.26317	15.8217	16.2646	11.8135
RchiOBHmChr2g0100831.gene	3.67008	2.36577	2.02295	9.79869	8.07388	7.92779
RchiOBHmChr2g0100841.gene	1.7766	2.02327	1.12003	9.46761	8.0201	9.07542
RchiOBHmChr2g0100901.gene	3.83417	3.79389	3.0754	1.1021	1.21985	1.72209
RchiOBHmChr2g0100961.gene	1.18852	0.506762	0.999339	9.18838	9.90258	7.90503
RchiOBHmChr2g0101031.gene	5.92766	6.12028	6.4055	4.42738	2.355	4.08795
RchiOBHmChr2g0101231.gene	2.11781	1.54216	1.70452	0.461653	0.655725	0.29857
RchiOBHmChr2g0101281.gene	35.9674	34.6562	31.4767	11.796	11.6184	6.22216
RchiOBHmChr2g0101491.gene	50.3483	46.1615	40.6405	14.2608	13.0984	1.8194
RchiOBHmChr2g0101741.gene	3.64346	3.34518	2.91697	1.74131	2.28837	0.852441
RchiOBHmChr2g0101761.gene	6.92432	6.37353	6.80296	19.2487	19.6321	21.0624
RchiOBHmChr2g0101891.gene	0.869798	0.618707	0.639959	5.94138	4.48475	4.97754
RchiOBHmChr2g0101981.gene	1.85806	1.5685	0.698423	24.7727	20.5924	19.5032
RchiOBHmChr2g0102661.gene	182.369	202.434	216.759	113.346	125.211	114.158
RchiOBHmChr2g0102671.gene	691.341	773.926	738.437	186.392	225.832	204.829
RchiOBHmChr2g0102751.gene	29.9165	33.4818	34.4945	13.9712	17.0045	13.8424
RchiOBHmChr2g0102811.gene	3.7527	2.83331	3.04175	8.28229	10.8888	11.7979
RchiOBHmChr2g0102841.gene	1.50052	1.13486	1.90779	0.164854	0.269082	0.473232
RchiOBHmChr2g0102951.gene	0.433119	0.295776	0.788323	1.433	1.73263	1.46267
RchiOBHmChr2g0102961.gene	0.361409	0.356269	0.315834	1.59137	1.90301	2.13031
RchiOBHmChr2g0102971.gene	65.7606	69.1451	71.6014	34.5597	34.2533	35.9318
RchiOBHmChr2g0103061.gene	0.169495	0.089525	0.116639	0.81857	0.707482	0.392283
RchiOBHmChr2g0103121.gene	28.2928	20.5131	16.464	76.7167	67.6767	62.6067
RchiOBHmChr2g0103161.gene	64.6598	69.2612	66.181	315.532	278.632	208.302
RchiOBHmChr2g0103221.gene	0.827361	0.667153	0.29494	2.82329	2.66635	2.38059
RchiOBHmChr2g0103251.gene	8.41063	6.58675	6.83866	26.3155	18.3635	23.5198
RchiOBHmChr2g0103351.gene	1.37425	0.975527	0.954425	0.050996	0.173884	0.119052
RchiOBHmChr2g0103421.gene	19.3493	20.7781	17.2925	11.6826	9.13514	11.7729
RchiOBHmChr2g0103711.gene	0.215186	0.364344	0.243715	1.75814	1.53099	2.0099
RchiOBHmChr2g0103751.gene	0.626978	0.595605	0.521201	7.91107	7.0024	6.59493
RchiOBHmChr2g0103951.gene	1.11274	0.636132	0.517788	26.7977	24.7448	25.0803
RchiOBHmChr2g0104051.gene	3.21283	2.35632	1.92202	11.5963	8.43014	9.48859
RchiOBHmChr2g0104121.gene	1.20094	0.463054	0.554203	4.79555	4.51198	3.55203
RchiOBHmChr2g0104191.gene	4.38333	4.14942	4.52107	12.783	12.1143	7.89772
RchiOBHmChr2g0104281.gene	0.464618	0.569942	0.368931	2.27383	1.56144	2.35921
RchiOBHmChr2g0104361.gene	1.66104	0.897585	0.890433	3.71151	3.35427	3.23963
RchiOBHmChr2g0104391.gene	0.944711	0.110561	0.534803	1.68957	1.64359	2.12983
RchiOBHmChr2g0104441.gene	0.661201	0.049923	0.084175	2.17199	2.72718	1.12537
RchiOBHmChr2g0104491.gene	5.814	5.50047	7.77732	2.71716	2.54467	3.30278
RchiOBHmChr2g0104521.gene	61.4772	68.9635	61.7601	17.4589	17.7595	19.2139
RchiOBHmChr2g0104561.gene	0.683492	0.577996	0.402134	5.24458	5.3174	3.32658
RchiOBHmChr2g0104571.gene	1.1984	0.541732	0.058677	3.37983	1.9049	1.85594
RchiOBHmChr2g0104641.gene	0.432963	0.240161	0.253746	5.22624	3.94304	3.70078
RchiOBHmChr2g0104671.gene	7.37247	5.87892	7.58377	21.2126	18.5474	29.1188
RchiOBHmChr2g0104801.gene	7.28232	8.01186	6.19555	18.8595	22.6699	23.3342
RchiOBHmChr2g0104811.gene	2.18199	1.33248	1.27885	3.13132	4.61491	5.02183
RchiOBHmChr2g0104821.gene	0.474002	0.302635	0.307905	2.04275	1.81602	2.83745
RchiOBHmChr2g0104831.gene	0.474612	0.105405	0.171396	1.56344	1.47393	0.92322
RchiOBHmChr2g0105011.gene	38.509	34.3024	33.8898	8.66741	8.40922	5.29738
RchiOBHmChr2g0105181.gene	6.69879	8.65663	6.5111	0.391643	0.442106	0.506844
RchiOBHmChr2g0105601.gene	30.4389	27.4111	23.169	119.751	103.366	62.3709
RchiOBHmChr2g0105691.gene	23.8385	23.5006	34.6748	11.366	11.825	11.4435
RchiOBHmChr2g0105701.gene	48.9223	49.5557	55.6885	9.60772	18.3546	13.4923
RchiOBHmChr2g0105711.gene	9.16702	11.0712	9.4223	4.14117	4.41755	3.17049
RchiOBHmChr2g0105751.gene	1.72702	1.20024	1.22319	4.84636	4.69716	3.62271
RchiOBHmChr2g0105761.gene	2.2396	1.83915	2.26245	11.636	11.9308	7.86386
RchiOBHmChr2g0105771.gene	0.34995	0.553615	0.474278	2.69534	2.53385	1.6853
RchiOBHmChr2g0105821.gene	0.181236	0.255875	0.599985	5.79874	6.59541	3.71213
RchiOBHmChr2g0105831.gene	0.220302	0.296584	0.296523	1.45689	1.14752	0.805463
RchiOBHmChr2g0105911.gene	6.69644	7.39789	6.76831	19.512	19.1167	13.1978
RchiOBHmChr2g0105961.gene	8.16591	8.76163	9.62851	25.4697	18.5605	21.8579
RchiOBHmChr2g0106211.gene	0.49106	0.883344	0.631481	3.36687	2.2439	3.08593
RchiOBHmChr2g0106291.gene	3.20567	3.3631	3.10045	11.1526	10.1177	8.07778
RchiOBHmChr2g0106321.gene	5.56471	5.79977	5.77587	1.57528	2.72815	3.39212
RchiOBHmChr2g0106361.gene	30.9226	33.6817	29.6418	107.838	93.7228	88.0592
RchiOBHmChr2g0106491.gene	9.31262	8.41914	9.10842	2.38633	3.85447	5.47369
RchiOBHmChr2g0106641.gene	2.01977	2.16398	2.04726	13.3972	16.0907	12.9396
RchiOBHmChr2g0107111.gene	2.46418	1.87521	2.38545	6.07316	5.03563	8.08492
RchiOBHmChr2g0107231.gene	13.0059	11.013	11.6529	41.648	36.2782	27.0829
RchiOBHmChr2g0107241.gene	35.755	34.3731	33.793	103.37	88.3684	77.2015
RchiOBHmChr2g0107311.gene	4.0324	1.92913	3.03028	0.620537	0.702448	1.57369
RchiOBHmChr2g0107321.gene	96.1278	74.9934	77.6659	11.9567	23.2924	27.41
RchiOBHmChr2g0107341.gene	0.433175	0.422969	0.392934	2.44676	1.61335	1.70983
RchiOBHmChr2g0107471.gene	172.994	197.364	168.073	88.0815	86.9786	79.5715
RchiOBHmChr2g0107511.gene	0.50682	0.214432	0.369141	2.46771	3.27139	2.30419
RchiOBHmChr2g0107581.gene	15.8743	14.0567	12.9336	47.1786	38.9857	26.9123
RchiOBHmChr2g0107591.gene	0.914424	0.858781	0.876053	3.37931	1.9106	3.19253
RchiOBHmChr2g0107651.gene	21.1521	19.9739	24.1626	5.46587	6.25968	10.3526
RchiOBHmChr2g0107721.gene	0.22001	0.146322	0.351886	5.35833	6.07064	5.48021
RchiOBHmChr2g0107911.gene	5.81814	1.48424	2.45386	27.4956	42.5472	36.9846
RchiOBHmChr2g0107981.gene	50.3183	51.6982	49.284	28.2396	38.7192	20.6717
RchiOBHmChr2g0108231.gene	2.1693	2.24613	1.42339	5.13847	5.22566	6.92007
RchiOBHmChr2g0108401.gene	71.4369	69.8247	85.9955	20.2736	27.1674	24.1324
RchiOBHmChr2g0108571.gene	31.0117	17.5675	21.2936	71.7684	65.292	68.2767
RchiOBHmChr2g0108691.gene	40.3184	56.7201	48.986	2.87923	4.5088	4.90272
RchiOBHmChr2g0108711.gene	34.0687	35.9329	32.8775	24.0523	18.5148	17.6864
RchiOBHmChr2g0108881.gene	35.5747	41.1596	37.4595	16.651	15.5596	17.8736
RchiOBHmChr2g0109261.gene	66.5408	60.6114	67.9089	32.3601	28.4521	42.3277
RchiOBHmChr2g0109441.gene	1.01118	0.582287	0.894018	7.67745	5.07971	4.41373
RchiOBHmChr2g0109471.gene	0.955568	1.39869	1.34432	5.30611	4.88361	2.93103
RchiOBHmChr2g0109651.gene	2.45046	2.3516	2.69941	5.58086	6.12945	6.98808
RchiOBHmChr2g0109871.gene	11.8072	12.7876	10.2748	7.90085	6.21443	6.69975
RchiOBHmChr2g0109931.gene	0.592632	0.566665	0.781314	2.77273	2.14119	2.05367
RchiOBHmChr2g0109941.gene	1.27279	0.984025	0.943198	15.531	11.3124	19.2071
RchiOBHmChr2g0110011.gene	1.5216	1.12388	1.73036	6.94205	7.14052	9.22909
RchiOBHmChr2g0110071.gene	20.8757	19.7794	18.1732	110.013	94.2693	88.7643
RchiOBHmChr2g0110471.gene	581.871	579.999	522.846	189.239	254.228	249.306
RchiOBHmChr2g0110681.gene	1.69301	1.67322	1.96796	4.15022	4.9497	3.65729
RchiOBHmChr2g0110711.gene	183.925	186.725	187.233	51.0906	72.351	64.7238
RchiOBHmChr2g0111001.gene	59.0186	64.9131	67.3018	25.1567	32.6322	27.825
RchiOBHmChr2g0111031.gene	0.132396	0.116462	0.175644	2.54775	2.01571	0.887448
RchiOBHmChr2g0111041.gene	0.63162	0.393799	0.218949	4.58691	2.53885	3.13501
RchiOBHmChr2g0111061.gene	1.0859	1.1013	0.931949	5.98413	5.76951	6.09399
RchiOBHmChr2g0111121.gene	1.52045	1.33753	0.902474	5.69763	5.45232	5.68802
RchiOBHmChr2g0111181.gene	6.42497	6.74933	7.34912	2.79825	2.69535	3.32457
RchiOBHmChr2g0111191.gene	72.035	74.4803	75.0299	35.3075	37.2801	38.2474
RchiOBHmChr2g0111201.gene	0.353603	0.519138	0.456664	1.85181	1.82476	1.52629
RchiOBHmChr2g0111951.gene	151.923	195.376	217.151	16.6935	32.5907	13.0539
RchiOBHmChr2g0112071.gene	26.2279	29.2482	26.5695	11.2789	13.996	12.1325
RchiOBHmChr2g0112221.gene	0.10686	0	0	7.72214	5.22546	7.087
RchiOBHmChr2g0112421.gene	1.02245	0.778088	0.843341	3.00574	2.4135	2.83535
RchiOBHmChr2g0112631.gene	0.594696	0.571212	0.639701	2.25227	2.01169	2.82442
RchiOBHmChr2g0112641.gene	0.42349	0.770341	0.579733	2.85644	1.63681	1.78761
RchiOBHmChr2g0113011.gene	18.7112	20.4017	22.1019	9.43133	10.6976	8.57568
RchiOBHmChr2g0113161.gene	9.1085	9.30887	9.61499	32.354	23.9246	28.8969
RchiOBHmChr2g0113451.gene	9.02867	6.7599	7.42393	3.80152	4.5922	3.46624
RchiOBHmChr2g0113471.gene	0.694535	0.206669	0.464487	2.69566	3.18264	3.51063
RchiOBHmChr2g0114501.gene	0.553199	0.627819	0.51014	4.06071	6.91974	3.20848
RchiOBHmChr2g0114921.gene	7.0869	6.69205	7.36288	2.26696	3.92337	4.32984
RchiOBHmChr2g0115081.gene	0.833769	1.06589	1.13539	4.01309	2.88109	3.72722
RchiOBHmChr2g0115091.gene	48.7871	44.0471	44.3194	26.554	27.6561	28.1065
RchiOBHmChr2g0115271.gene	112.195	116.64	102.018	48.1878	75.4765	55.5816
RchiOBHmChr2g0115441.gene	6.25319	7.26307	8.10611	2.22974	2.62399	3.21471
RchiOBHmChr2g0115501.gene	3.27652	5.14754	4.27142	15.0928	10.2825	15.3271
RchiOBHmChr2g0115511.gene	1.33973	2.02135	1.21523	16.8963	15.1605	8.16099
RchiOBHmChr2g0115521.gene	3.87333	4.35729	4.25782	13.5981	11.5989	11.1274
RchiOBHmChr2g0115801.gene	0	0	0	3.86685	2.48958	3.56397
RchiOBHmChr2g0115811.gene	0	0	0	2.91271	2.00055	1.96854
RchiOBHmChr2g0115901.gene	11.9374	10.4808	10.2574	87.3887	93.5488	74.784
RchiOBHmChr2g0115971.gene	1.0305	0.919996	0.66446	3.92925	3.37594	2.71262
RchiOBHmChr2g0115981.gene	3.01698	2.20383	2.10056	0.820429	0.701761	0.806224
RchiOBHmChr2g0116161.gene	7.16061	7.36319	7.65174	21.0928	17.4013	18.595
RchiOBHmChr2g0116361.gene	5.59769	4.60133	5.31013	26.8691	29.3083	21.7186
RchiOBHmChr2g0117081.gene	3.27621	3.09608	3.13787	0.145693	0.701021	0.511812
RchiOBHmChr2g0117221.gene	56.891	47.3618	51.6238	29.3668	32.8156	27.9686
RchiOBHmChr2g0117361.gene	3.37915	2.43478	2.68199	7.16045	7.07443	7.89635
RchiOBHmChr2g0118231.gene	1.25424	1.41036	1.39742	0.460609	0.389622	0.511633
RchiOBHmChr2g0119231.gene	3.99952	2.43475	2.8683	2.37731	1.35927	0.84179
RchiOBHmChr2g0119261.gene	1.50347	1.59281	1.34134	3.40398	3.57857	4.5419
RchiOBHmChr2g0119291.gene	1879.19	2001.74	2267.79	731.507	815.25	675.927
RchiOBHmChr2g0119481.gene	1.97213	1.73965	1.37532	0.310015	0.987718	0.628464
RchiOBHmChr2g0120091.gene	11.9473	12.2514	11.3827	68.2129	61.976	57.7452
RchiOBHmChr2g0120171.gene	5.06492	5.50488	4.29453	21.2708	20.0761	21.4995
RchiOBHmChr2g0120841.gene	0.676666	0.929028	0.485421	5.54119	5.34833	5.59324
RchiOBHmChr2g0120891.gene	14.8685	11.1195	12.5789	80.3488	66.0502	59.3427
RchiOBHmChr2g0120941.gene	0.424881	0.748539	0.336287	12.6226	6.1053	8.58065
RchiOBHmChr2g0121151.gene	4.46116	4.78738	3.09385	2.17693	2.82891	0.878083
RchiOBHmChr2g0121181.gene	0.254805	0.18064	0.116747	2.45544	3.82174	3.98256
RchiOBHmChr2g0121711.gene	1.10607	0.828162	0.620761	15.6572	12.5225	15.1071
RchiOBHmChr2g0121921.gene	6.18348	9.51562	14.5317	0.02162	0.24242	0.1445
RchiOBHmChr2g0122191.gene	3.1696	3.96041	3.28793	9.29025	9.11593	8.04883
RchiOBHmChr2g0122591.gene	2.14377	0.858209	1.06613	8.85017	13.0729	15.2915
RchiOBHmChr2g0122781.gene	9.10781	9.6337	9.72329	5.01165	4.32965	6.39579
RchiOBHmChr2g0122791.gene	47.9216	59.5986	66.6336	25.8877	28.8555	31.3751
RchiOBHmChr2g0122871.gene	11.6912	11.6966	9.43162	42.3675	39.8499	37.0778
RchiOBHmChr2g0122891.gene	12.8972	12.9366	11.2756	48.9075	44.3573	33.9032
RchiOBHmChr2g0123141.gene	4.8596	3.61419	4.59856	24.4245	18.9697	24.3886
RchiOBHmChr2g0123351.gene	2.26957	1.81104	5.43495	0.809174	0.507259	0.852713
RchiOBHmChr2g0123461.gene	1.8409	1.26049	1.61883	4.22784	4.46819	4.62868
RchiOBHmChr2g0123611.gene	3.28613	2.71086	4.04598	14.1214	10.6024	10.6413
RchiOBHmChr2g0123661.gene	3.25688	2.6326	2.42621	8.29304	6.77356	5.4217
RchiOBHmChr2g0123701.gene	0.272664	0.204013	0.293607	1.1278	0.665126	0.762769
RchiOBHmChr2g0123751.gene	7.71534	7.62774	6.69064	17.1387	16.0102	23.9332
RchiOBHmChr2g0123771.gene	9.40944	8.63487	10.2394	33.8891	34.6466	27.3589
RchiOBHmChr2g0123871.gene	0.273057	0.536823	0.238083	7.13948	4.35564	16.4696
RchiOBHmChr2g0123891.gene	0.104616	0.503148	0.194368	3.46771	1.80157	6.18846
RchiOBHmChr2g0124401.gene	5.20895	5.99503	7.05897	0.454317	0.465215	0.553966
RchiOBHmChr2g0124451.gene	7.53229	5.76235	10.0341	0.280016	0.584527	0.58755
RchiOBHmChr2g0124461.gene	7.41365	6.7466	12.5232	1.68201	1.68078	1.74015
RchiOBHmChr2g0124531.gene	3.1266	1.97596	2.15097	0.430168	0.652633	0.140982
RchiOBHmChr2g0124561.gene	3.21969	3.79918	5.49338	1.29624	0.833435	0.60497
RchiOBHmChr2g0124691.gene	22.0103	21.4853	24.3846	4.32483	4.81169	5.77482
RchiOBHmChr2g0124821.gene	86.1199	96.5617	72.3379	292.065	307.621	180.297
RchiOBHmChr2g0124991.gene	0.297218	0.366276	0.474778	5.24675	4.64886	3.67741
RchiOBHmChr2g0125151.gene	0.923684	1.00672	1.00873	2.89048	3.31045	3.28156
RchiOBHmChr2g0125431.gene	13.1872	12.5981	14.0585	38.2086	46.4579	25.3451
RchiOBHmChr2g0125471.gene	14.8345	14.6937	14.3718	48.8582	40.0903	42.7624
RchiOBHmChr2g0125831.gene	8.66334	6.91639	6.61605	19.5051	20.7277	21.5743
RchiOBHmChr2g0126111.gene	239.246	146.003	143.542	1339.37	957.689	1189.77
RchiOBHmChr2g0126741.gene	0.272069	0.353127	0.173123	4.68612	3.20167	1.53035
RchiOBHmChr2g0126861.gene	0.044876	0.31629	0.573402	3.82176	2.34118	1.90706
RchiOBHmChr2g0126871.gene	0.817881	1.06261	1.09993	5.69347	3.44197	3.19288
RchiOBHmChr2g0127161.gene	17.5252	19.0981	16.3555	7.10184	5.61372	4.63582
RchiOBHmChr2g0127191.gene	1.4632	1.27949	0.951231	16.5239	9.08737	12.1132
RchiOBHmChr2g0127351.gene	0.295479	0.392452	0.645587	4.11716	3.82995	4.5474
RchiOBHmChr2g0127601.gene	1.60647	1.93299	2.25386	8.17341	7.93989	6.87321
RchiOBHmChr2g0127641.gene	0.855057	0.670204	0.623292	2.4765	2.59292	1.98513
RchiOBHmChr2g0127661.gene	37.8186	38.2047	34.2781	104.23	100.221	85.2676
RchiOBHmChr2g0128091.gene	2425.13	1998.93	2182.17	934.685	1078.19	839.142
RchiOBHmChr2g0128641.gene	401.813	308.461	431.585	186.035	187.497	147.201
RchiOBHmChr2g0128711.gene	3.06117	2.14034	3.40433	9.18804	10.1234	8.35319
RchiOBHmChr2g0128811.gene	3.88779	2.04236	3.39143	1.01049	0.591646	0.740606
RchiOBHmChr2g0128881.gene	2.33703	1.84916	1.79247	6.66608	6.11255	4.73766
RchiOBHmChr2g0128901.gene	30.9997	24.9155	27.2229	15.0162	13.5707	18.8338
RchiOBHmChr2g0129071.gene	173.818	135.059	120.14	56.1397	54.2268	57.3033
RchiOBHmChr2g0129511.gene	21.2828	18.411	18.7638	9.48489	12.519	9.45438
RchiOBHmChr2g0129531.gene	6.49141	7.76016	7.76258	2.4537	2.72631	1.6849
RchiOBHmChr2g0129541.gene	8.10512	8.70906	5.4524	2.199	4.51225	0.744839
RchiOBHmChr2g0129981.gene	52.951	51.5694	56.7441	30.1369	30.9636	32.2492
RchiOBHmChr2g0130021.gene	2.63558	1.11989	1.29837	10.8483	11.0109	8.65239
RchiOBHmChr2g0130331.gene	2.34637	1.31086	1.38357	6.99382	9.35934	6.08951
RchiOBHmChr2g0130711.gene	12.8352	11.7122	13.0557	32.0312	33.7221	26.3115
RchiOBHmChr2g0130821.gene	1.55823	1.26003	0.920368	6.20321	3.78261	3.00843
RchiOBHmChr2g0130851.gene	2.21195	1.57656	2.32706	6.59084	6.21951	4.73471
RchiOBHmChr2g0131061.gene	85.433	83.0732	88.2944	46.3984	54.1207	55.9644
RchiOBHmChr2g0131591.gene	1.04365	1.62205	1.18342	5.25189	2.4301	3.52292
RchiOBHmChr2g0131671.gene	28.9146	47.3727	62.0108	7.58375	22.9919	21.6917
RchiOBHmChr2g0131701.gene	17.1498	13.7567	15.5836	159.466	109.703	114.663
RchiOBHmChr2g0132161.gene	4.29197	3.58914	5.73451	24.1316	18.746	12.4073
RchiOBHmChr2g0132241.gene	0.277052	0.08984	0.180177	3.37847	3.8799	3.76609
RchiOBHmChr2g0132251.gene	0.19795	0.182521	0.033233	0.86853	1.17309	0.870234
RchiOBHmChr2g0132271.gene	0.94848	0.52729	1.00758	3.31293	2.12141	2.82665
RchiOBHmChr2g0132281.gene	9.37765	8.99442	10.4697	6.53881	5.68308	3.35298
RchiOBHmChr2g0132341.gene	26.7554	26.6583	25.7789	12.1771	12.4775	11.144
RchiOBHmChr2g0132541.gene	0.446371	0.057914	0.21505	0.844445	1.61137	0.836468
RchiOBHmChr2g0132651.gene	0.280994	0.141365	0.170819	0.734119	0.891398	0.832595
RchiOBHmChr2g0132811.gene	0.47596	0.46493	0.438275	15.9069	15.2493	12.3111
RchiOBHmChr2g0132861.gene	0.180213	0.048763	0.086063	1.65784	2.44804	1.17246
RchiOBHmChr2g0132911.gene	5.37098	5.8063	6.76449	19.8255	13.5914	18.4146
RchiOBHmChr2g0132981.gene	1.7681	2.20141	1.62535	12.9893	11.2917	14.2812
RchiOBHmChr2g0133001.gene	9.74798	7.65955	4.81833	120.356	82.395	83.6354
RchiOBHmChr2g0133031.gene	5.67902	4.9412	4.28478	14.0491	13.6128	17.6638
RchiOBHmChr2g0133521.gene	6.50367	6.53929	6.71888	19.0742	18.4635	13.3022
RchiOBHmChr2g0134181.gene	0.999003	0.510042	0.736115	0.173275	0.065254	0.224049
RchiOBHmChr2g0134291.gene	0.943739	1.35072	1.22445	4.24453	3.53118	4.10679
RchiOBHmChr2g0134391.gene	0.07737	0.04924	0.037016	0.619244	0.594391	0.532679
RchiOBHmChr2g0134571.gene	99.7476	97.2653	101.444	54.7132	59.14	57.9803
RchiOBHmChr2g0134791.gene	2.209	3.33757	4.20593	9.91624	6.20409	7.11572
RchiOBHmChr2g0134861.gene	3.65148	3.77232	3.18211	8.75536	9.83958	10.7282
RchiOBHmChr2g0134871.gene	1.08438	0.498222	0.54265	3.43865	3.02286	2.67405
RchiOBHmChr2g0134981.gene	0.718375	0.394637	0.468093	3.74455	2.06929	3.43336
RchiOBHmChr2g0134991.gene	128.889	159.509	180.392	60.5783	76.1078	90.9542
RchiOBHmChr2g0135001.gene	5.30104	3.82382	3.55038	2.38129	2.03748	3.29477
RchiOBHmChr2g0135111.gene	20.8616	18.7774	20.0963	9.1532	13.7482	10.4753
RchiOBHmChr2g0135421.gene	5.20783	6.4273	6.13524	3.8169	2.85353	3.82796
RchiOBHmChr2g0135631.gene	0.648078	0.984377	1.13587	0.291547	0.325076	0.122569
RchiOBHmChr2g0135711.gene	37.3809	38.7268	40.0256	20.9171	18.9406	15.779
RchiOBHmChr2g0135861.gene	47.8785	46.084	46.5714	15.3319	20.105	24.6495
RchiOBHmChr2g0135871.gene	11.899	16.2738	18.459	6.70196	6.11003	7.97236
RchiOBHmChr2g0135921.gene	10.1562	15.552	18.6947	0.334197	1.34549	0.748833
RchiOBHmChr2g0135961.gene	100.464	101.369	106.705	23.6785	29.1319	22.2364
RchiOBHmChr2g0136071.gene	0.451921	0.733712	0.106708	0.944611	1.49826	1.02548
RchiOBHmChr2g0136241.gene	0.251297	0.12973	0.074814	0.558954	0.747748	1.26087
RchiOBHmChr2g0136431.gene	19.35	21.8497	21.7552	9.57522	10.3082	11.3616
RchiOBHmChr2g0136471.gene	1.39415	0.634036	0.940353	2.41632	2.90693	3.93572
RchiOBHmChr2g0136771.gene	2.51385	2.05534	2.1856	8.64	6.33079	6.05228
RchiOBHmChr2g0136791.gene	0.094361	0.143657	0	0.476643	0.581935	0.921957
RchiOBHmChr2g0136821.gene	10.0152	8.60217	11.1355	3.71307	3.22573	3.02144
RchiOBHmChr2g0136831.gene	17.9482	17.3251	15.4304	2.65586	2.09245	2.96297
RchiOBHmChr2g0136841.gene	1291.45	1410.96	1252.04	409.579	449.157	425.908
RchiOBHmChr2g0137001.gene	25.5767	29.1219	29.6766	13.5826	9.16635	14.0209
RchiOBHmChr2g0137051.gene	1.24265	1.4	1.17481	11.3527	13.4287	9.5057
RchiOBHmChr2g0137061.gene	0.613278	0.628205	0.464498	1.55664	2.15891	2.01135
RchiOBHmChr2g0137071.gene	0.205459	0.66389	0.6226	4.39206	4.2457	3.65024
RchiOBHmChr2g0137231.gene	32.2036	31.742	41.4634	2.51518	3.57956	2.88678
RchiOBHmChr2g0137261.gene	224.141	223.356	228.729	64.2569	62.3256	59.324
RchiOBHmChr2g0137311.gene	13.0185	6.04511	8.78654	2.27532	5.07621	3.96443
RchiOBHmChr2g0137321.gene	7.3851	4.36215	5.47892	1.77715	3.31722	2.78945
RchiOBHmChr2g0137471.gene	0.473819	0.186399	0.105075	1.38136	1.1385	1.63334
RchiOBHmChr2g0137681.gene	3.07362	2.27696	2.92033	17.4775	19.5838	13.2383
RchiOBHmChr2g0137721.gene	1.14866	0.648899	0.226821	16.8675	12.25	15.7052
RchiOBHmChr2g0137941.gene	0.247429	0.711091	0.44999	5.48851	3.96868	2.09147
RchiOBHmChr2g0138231.gene	1.31051	1.28556	1.61126	0.18941	0.233148	0.079984
RchiOBHmChr2g0138241.gene	6.61221	6.65977	9.02932	1.61505	2.38627	1.50312
RchiOBHmChr2g0138671.gene	6.34576	6.86633	7.51114	2.79771	4.77892	3.54111
RchiOBHmChr2g0138731.gene	5.94926	5.42684	5.93773	34.5281	34.4274	27.9206
RchiOBHmChr2g0138931.gene	11.4916	9.11693	9.36537	115.751	98.1386	74.1945
RchiOBHmChr2g0139061.gene	34.2526	25.2898	29.2398	5.63926	5.64243	5.84254
RchiOBHmChr2g0139201.gene	4.31894	3.1053	3.29271	10.6218	12.0015	10.7338
RchiOBHmChr2g0139391.gene	0.784128	1.15681	2.5696	9.55529	5.28661	4.54001
RchiOBHmChr2g0139561.gene	0.727748	0.764296	0.112455	9.67684	4.8865	4.68791
RchiOBHmChr2g0139661.gene	0.813531	1.23062	0.659532	9.59936	13.9276	8.79099
RchiOBHmChr2g0140051.gene	16.8159	22.7245	23.4108	9.20227	9.3436	6.83094
RchiOBHmChr2g0140091.gene	43.4581	62.5079	52.8565	33.185	22.346	28.0051
RchiOBHmChr2g0140141.gene	0.054358	0	0.093596	0.928389	0.867322	2.2986
RchiOBHmChr2g0140401.gene	0.516871	0.444671	0.358224	1.52778	1.29533	1.76848
RchiOBHmChr2g0140711.gene	7.06105	9.45921	9.25125	3.95127	4.27945	4.36256
RchiOBHmChr2g0140781.gene	2.76002	4.16521	3.54671	1.4486	2.67662	1.16485
RchiOBHmChr2g0140811.gene	0.294167	0.543774	0.376212	2.00695	2.06073	2.42909
RchiOBHmChr2g0141061.gene	23.5587	29.3156	29.9904	14.3529	12.4224	15.4763
RchiOBHmChr2g0141891.gene	8.58238	13.0917	11.809	6.6986	7.26296	5.66394
RchiOBHmChr2g0142141.gene	3.53052	3.43332	4.27453	0.884407	2.36933	1.15122
RchiOBHmChr2g0142371.gene	62.2418	54.2523	53.5179	14.7987	17.8957	22.7538
RchiOBHmChr2g0142571.gene	67.6426	67.6767	68.1035	21.7126	36.2634	28.5261
RchiOBHmChr2g0142951.gene	0.260282	0.129781	0.148049	0.895295	0.579085	0.644821
RchiOBHmChr2g0142961.gene	90.731	79.2648	68.3508	346.25	234.007	323.687
RchiOBHmChr2g0142971.gene	5.51923	4.38333	5.65878	15.6794	13.4091	15.7386
RchiOBHmChr2g0143221.gene	1.19531	1.20987	1.34752	4.4015	4.03914	4.93414
RchiOBHmChr2g0143341.gene	7.18111	7.63609	5.27985	17.8663	19.8827	21.1283
RchiOBHmChr2g0143521.gene	13.0757	14.6802	12.6423	7.42662	8.17357	6.33788
RchiOBHmChr2g0143571.gene	2.43483	2.43189	2.17479	11.3321	9.21494	10.6082
RchiOBHmChr2g0143711.gene	0.534656	0.468808	0.607883	4.59317	5.03719	5.33767
RchiOBHmChr2g0143831.gene	22.5566	22.2752	16.3111	14.9676	9.38421	7.85083
RchiOBHmChr2g0144221.gene	10.9701	6.65279	7.69672	1.44011	3.98998	1.51569
RchiOBHmChr2g0144451.gene	180.598	196.742	198.486	87.404	78.0428	105.913
RchiOBHmChr2g0144551.gene	2.86669	2.63694	0.791752	24.5107	15.6493	19.0851
RchiOBHmChr2g0145011.gene	0.313547	0.134127	0.119548	2.71955	2.35612	1.87429
RchiOBHmChr2g0145111.gene	0.021794	0.100759	0.478925	2.51668	1.40724	1.86969
RchiOBHmChr2g0145191.gene	11.9649	12.2207	11.1667	26.0084	34.9547	31.9963
RchiOBHmChr2g0145211.gene	22.2657	20.6213	20.7648	11.776	9.02757	13.127
RchiOBHmChr2g0145221.gene	2.08826	0.992334	1.04671	5.78791	5.67512	3.40929
RchiOBHmChr2g0145281.gene	0.811561	0.321128	0.38103	1.55218	2.1429	2.80981
RchiOBHmChr2g0145381.gene	0.115952	0.024063	0.09846	1.15432	0.833399	0.630721
RchiOBHmChr2g0145891.gene	11.513	10.7992	14.3218	3.41409	3.02939	5.43628
RchiOBHmChr2g0145921.gene	7.58299	3.98969	3.60991	28.3116	45.2671	36.3918
RchiOBHmChr2g0146001.gene	9.1388	11.499	12.0419	4.12856	3.00594	2.03719
RchiOBHmChr2g0146061.gene	175.988	184.657	164.607	62.9928	74.0569	47.8546
RchiOBHmChr2g0146211.gene	6.3094	6.10804	5.43451	17.7987	17.1576	11.8843
RchiOBHmChr2g0146241.gene	31.3703	29.4358	37.9554	1.54259	2.21648	2.01005
RchiOBHmChr2g0146371.gene	41.3803	41.9317	31.295	321.2	321.954	121.527
RchiOBHmChr2g0146551.gene	0.235326	0.099459	0.149168	0.710108	1.45615	1.08393
RchiOBHmChr2g0146611.gene	1.10383	0.724411	0.687355	0.273159	0.404426	0.168292
RchiOBHmChr2g0146641.gene	11.0017	11.5312	10.2812	5.22099	6.21767	6.87481
RchiOBHmChr2g0146791.gene	23.6487	30.5308	24.2465	9.29018	7.3384	6.80575
RchiOBHmChr2g0147301.gene	2.00907	1.96211	1.29981	4.7223	5.08419	4.36167
RchiOBHmChr2g0147431.gene	53.5359	62.4046	44.348	3.48333	7.00404	5.37338
RchiOBHmChr2g0147441.gene	74.846	89.5459	62.0358	6.54112	10.3057	6.73428
RchiOBHmChr2g0147631.gene	6.76106	5.90731	5.85538	1.34554	2.8013	1.92321
RchiOBHmChr2g0147831.gene	0.427338	0.523676	0.509751	2.15219	2.66843	2.47026
RchiOBHmChr2g0148091.gene	0	0	0.112773	1.70448	1.31429	2.53787
RchiOBHmChr2g0148101.gene	1.92967	2.17858	1.70554	7.34369	9.67704	5.04002
RchiOBHmChr2g0148111.gene	2.95337	2.91713	2.36509	9.31282	9.26081	9.1712
RchiOBHmChr2g0148201.gene	1.01646	0.415406	0.498922	6.5722	6.73991	5.15036
RchiOBHmChr2g0148291.gene	0.593918	0.655611	0.831719	2.16671	2.3896	2.24569
RchiOBHmChr2g0148351.gene	0.404686	0.29847	0.169084	3.95403	1.68307	4.32207
RchiOBHmChr2g0148381.gene	0.966343	1.06264	0.820763	5.0617	3.65924	3.45252
RchiOBHmChr2g0149071.gene	0.949317	1.34896	1.08574	3.06095	3.48083	3.36297
RchiOBHmChr2g0149451.gene	5.5559	3.53557	2.86357	54.1129	35.323	49.5849
RchiOBHmChr2g0149621.gene	0.041665	0.03953	0	2.75346	1.3554	4.71183
RchiOBHmChr2g0149631.gene	88.9048	67.2465	104.512	34.04	51.011	0.59028
RchiOBHmChr2g0149641.gene	66.9095	90.9417	77.2111	41.5334	37.0235	38.7544
RchiOBHmChr2g0149751.gene	2.30747	0.616441	1.08118	4.38557	5.2912	5.69646
RchiOBHmChr2g0149841.gene	19.3763	18.3032	17.0397	55.1262	47.0895	46.0993
RchiOBHmChr2g0149971.gene	1.47543	0.866435	0.631927	10.6396	15.0702	6.70804
RchiOBHmChr2g0150131.gene	49.2183	60.6633	75.0552	30.4499	29.8218	29.2386
RchiOBHmChr2g0150371.gene	7.3843	6.40446	5.60723	29.3737	20.1049	26.5986
RchiOBHmChr2g0150431.gene	5.39881	3.40352	3.04754	30.8628	40.1592	33.6235
RchiOBHmChr2g0150451.gene	0.212749	0.178922	0.341998	3.76725	1.67561	3.45227
RchiOBHmChr2g0150831.gene	1.87588	1.45682	0.877672	25.0452	16.5627	8.90698
RchiOBHmChr2g0150941.gene	1.69476	1.76224	2.01844	0.97134	0.600358	0.830517
RchiOBHmChr2g0151031.gene	84.6791	107.036	108.915	25.0947	21.3885	24.6025
RchiOBHmChr2g0151041.gene	66.1233	71.8791	81.0586	36.07	41.1822	39.5043
RchiOBHmChr2g0151161.gene	0.469844	0.166216	0.116235	1.5255	1.44301	2.10804
RchiOBHmChr2g0151571.gene	0.424333	0.283672	0.123908	2.54296	1.38992	1.31155
RchiOBHmChr2g0151681.gene	1.76012	1.23561	1.41918	18.1826	14.9754	21.1292
RchiOBHmChr2g0152011.gene	3.28033	2.80597	3.64004	11.5365	10.0671	7.65178
RchiOBHmChr2g0152101.gene	281.472	270.011	274.848	47.1787	74.6395	40.3549
RchiOBHmChr2g0152151.gene	0.435276	0.558436	0.34468	1.43695	1.54442	2.02439
RchiOBHmChr2g0152321.gene	1.13587	0.873923	0.7751	4.60309	5.16527	5.46058
RchiOBHmChr2g0152351.gene	135.706	122.25	97.3411	43.8432	39.6611	39.622
RchiOBHmChr2g0152411.gene	9.80176	9.55636	9.4241	4.77095	3.30351	4.87592
RchiOBHmChr2g0152481.gene	40.4264	35.6231	34.0013	259.776	259.326	194.476
RchiOBHmChr2g0152501.gene	988.471	937.807	1049.3	59.4735	92.7215	78.8503
RchiOBHmChr2g0152901.gene	0.740326	0.982816	1.06033	0.34462	0.156094	0.759034
RchiOBHmChr2g0153111.gene	57.2561	47.0471	61.6593	18.8636	31.6806	24.8785
RchiOBHmChr2g0153221.gene	0.600413	0.483474	1.20451	5.14111	4.8571	4.96058
RchiOBHmChr2g0153451.gene	15.7114	13.3929	16.0893	6.45505	8.9518	9.00086
RchiOBHmChr2g0153461.gene	1.12074	0.570608	0.269662	4.14858	3.66479	3.17479
RchiOBHmChr2g0153961.gene	2.59247	2.10697	2.55613	0.503127	0.576614	1.13486
RchiOBHmChr2g0153971.gene	1.05808	0.693264	1.0435	0.188134	0.32024	0.433398
RchiOBHmChr2g0154021.gene	11.199	12.6726	8.98826	2.94906	3.71094	2.61031
RchiOBHmChr2g0154061.gene	0.127514	0.046175	0.09113	1.886	2.12465	3.21094
RchiOBHmChr2g0154191.gene	0	0	0	1.14677	1.44696	0.794304
RchiOBHmChr2g0154351.gene	0.15835	0.403081	0.326213	1.22377	1.4546	0.850516
RchiOBHmChr2g0155021.gene	0.522047	0.600132	0.35842	0.006933	0.149009	0.033326
RchiOBHmChr2g0155141.gene	18.1503	17.0997	15.6885	85.4179	71.8124	45.4934
RchiOBHmChr2g0155201.gene	0.935517	1.33522	1.15051	5.35466	3.96047	3.53664
RchiOBHmChr2g0155221.gene	20.0327	21.3545	27.9942	4.7809	6.86126	6.67268
RchiOBHmChr2g0155451.gene	12.73	10.9581	12.7075	5.34063	7.44824	5.69649
RchiOBHmChr2g0155471.gene	4.55293	2.06912	1.46888	10.4965	10.7025	7.1882
RchiOBHmChr2g0155571.gene	0.666336	0.63854	0.637052	2.63951	1.97669	2.39341
RchiOBHmChr2g0155621.gene	58.4628	57.2868	63.111	32.4045	32.0596	39.7004
RchiOBHmChr2g0155721.gene	0.165548	0.086237	0.02802	1.29794	0.937827	2.51197
RchiOBHmChr2g0155741.gene	13.2748	7.65982	9.06891	31.3047	26.664	27.2884
RchiOBHmChr2g0155831.gene	85.4539	90.5443	104.488	21.4686	26.9061	23.5149
RchiOBHmChr2g0155851.gene	8.74155	7.16169	7.09732	3.75611	3.42961	3.90954
RchiOBHmChr2g0155881.gene	12.7696	8.71189	14.4272	5.3051	5.53435	5.78539
RchiOBHmChr2g0155901.gene	0.230515	0.220677	0.12569	0.80571	0.754306	0.578529
RchiOBHmChr2g0155991.gene	4.87818	6.48686	6.06132	3.40714	2.69523	1.70777
RchiOBHmChr2g0156001.gene	3.3394	1.86777	1.75092	19.4939	15.0826	19.285
RchiOBHmChr2g0156411.gene	2.13498	2.3184	2.24138	0.506717	0.656459	0.7328
RchiOBHmChr2g0156501.gene	83.1858	73.9393	68.4442	44.8997	46.6154	45.3725
RchiOBHmChr2g0156601.gene	25.0885	29.1786	27.2817	15.045	22.6401	9.70771
RchiOBHmChr2g0156611.gene	5.13751	8.89929	10.2776	0.609064	1.10554	0.440414
RchiOBHmChr2g0156651.gene	5.22054	4.37117	3.95022	1.94022	1.67155	1.7732
RchiOBHmChr2g0156661.gene	10.8802	10.6882	11.0596	28.4857	26.6563	28.3684
RchiOBHmChr2g0156821.gene	43.4485	51.6239	59.1557	27.9745	19.3217	26.6499
RchiOBHmChr2g0157181.gene	116.847	160.834	199.457	16.0133	18.7904	19.7692
RchiOBHmChr2g0157191.gene	2.61403	2.64859	3.02343	8.09412	7.45569	6.3132
RchiOBHmChr2g0157201.gene	47.8756	56.7886	45.4578	22.3173	31.202	30.0187
RchiOBHmChr2g0157791.gene	12.746	12.6095	13.7805	5.62322	5.64366	7.52567
RchiOBHmChr2g0158051.gene	10.4278	9.54216	14.5982	1.21487	1.64261	2.03673
RchiOBHmChr2g0158111.gene	3.50444	5.26725	4.19224	49.2727	46.8373	37.2214
RchiOBHmChr2g0158391.gene	0.160477	0.221768	0.317293	1.81549	1.87777	1.49564
RchiOBHmChr2g0158421.gene	1.26246	1.06775	1.21373	0.407078	0.377544	0.487613
RchiOBHmChr2g0158451.gene	4.11265	3.10013	3.13651	14.4364	12.4341	15.3086
RchiOBHmChr2g0158531.gene	1.70266	1.12919	1.11682	4.70554	6.41571	6.5239
RchiOBHmChr2g0158621.gene	1.23682	1.0115	1.25428	3.95713	3.65845	3.76841
RchiOBHmChr2g0158631.gene	114.172	128.21	133.512	72.3471	84.3016	70.4905
RchiOBHmChr2g0158741.gene	0.03002	0.044696	0.023009	3.43425	1.42213	2.05127
RchiOBHmChr2g0158801.gene	0.222215	0.275608	0.296365	4.60329	2.25852	2.02952
RchiOBHmChr2g0158821.gene	37.4688	37.4809	47.4124	1.86058	3.11169	2.96936
RchiOBHmChr2g0158841.gene	0.458241	0.362401	0.115048	5.24739	4.40136	5.98347
RchiOBHmChr2g0158971.gene	19.3101	17.5396	19.3439	92.6712	90.4263	80.9096
RchiOBHmChr2g0159041.gene	423.027	409.233	436.153	186.493	205.794	230.338
RchiOBHmChr2g0159221.gene	50.6893	47.2248	56.2865	23.9965	25.508	26.1117
RchiOBHmChr2g0159311.gene	3.76132	1.61958	1.82408	11.6463	7.46996	11.3462
RchiOBHmChr2g0159351.gene	1.63082	1.39136	1.42024	4.27184	2.20758	4.55532
RchiOBHmChr2g0159421.gene	3.95685	0.987684	1.57015	13.9864	11.7635	14.5323
RchiOBHmChr2g0159431.gene	0.069107	0.0705	0.055312	1.54267	1.28205	0.993712
RchiOBHmChr2g0159531.gene	7.12996	8.57906	8.41383	18.7417	25.8974	19.1222
RchiOBHmChr2g0159921.gene	9.24309	5.91797	7.45112	19.2353	21.1757	17.0631
RchiOBHmChr2g0160131.gene	4.04502	4.26826	4.46652	0.730778	1.3342	1.32494
RchiOBHmChr2g0160301.gene	0.168491	0.161477	0.080356	0.844425	0.445954	0.631947
RchiOBHmChr2g0160441.gene	7.00524	6.85768	8.75579	0.469596	0.527306	0.386411
RchiOBHmChr2g0160611.gene	83.853	34.9198	24.6796	624.686	629.05	275.251
RchiOBHmChr2g0160621.gene	7.34406	6.45754	5.19995	18.0197	18.8066	13.9306
RchiOBHmChr2g0160651.gene	0.851471	0.872105	0.828073	5.19197	5.10585	1.98232
RchiOBHmChr2g0161131.gene	6.58035	8.62044	8.66043	0.566454	1.61373	0.693462
RchiOBHmChr2g0161291.gene	0.288552	0.170556	0.184738	2.2536	1.32201	0.82236
RchiOBHmChr2g0161311.gene	2.07118	3.14199	2.32309	0.341968	0.338684	0.315013
RchiOBHmChr2g0161321.gene	21.2799	24.8518	25.7195	7.46409	10.2731	9.70045
RchiOBHmChr2g0161331.gene	3.15705	3.32477	4.76819	0.939402	1.97131	1.20304
RchiOBHmChr2g0161381.gene	8.0737	8.86223	4.95557	2.94215	3.07798	2.22402
RchiOBHmChr2g0161541.gene	2.59828	2.38586	2.62647	6.88492	8.1265	5.40423
RchiOBHmChr2g0161781.gene	0.270892	0.894756	0.553045	5.38383	5.32733	4.22707
RchiOBHmChr2g0162061.gene	7.99612	9.87926	8.14459	3.22298	3.5066	2.21233
RchiOBHmChr2g0162111.gene	0.450723	0.408211	0.2461	0.942607	1.45529	1.07849
RchiOBHmChr2g0162231.gene	0.201488	0.071289	0.222212	2.07947	2.12993	2.09031
RchiOBHmChr2g0162351.gene	8.82735	7.60938	14.4656	0.557026	0.601134	0.231929
RchiOBHmChr2g0162381.gene	3.99138	4.33538	2.62665	27.1018	24.9498	21.3228
RchiOBHmChr2g0162561.gene	1.10398	0.938168	0.617536	3.54501	2.50721	2.72148
RchiOBHmChr2g0163131.gene	67.1802	63.8093	65.3433	30.0409	26.8138	21.4937
RchiOBHmChr2g0163151.gene	9.55174	2.74906	5.42597	155.794	220.174	101.198
RchiOBHmChr2g0163451.gene	11.9892	12.8555	11.268	5.58292	6.18253	6.49305
RchiOBHmChr2g0163731.gene	0.62789	0.499278	0.488223	3.26554	3.59903	1.74621
RchiOBHmChr2g0163771.gene	3.66081	4.30972	3.09485	16.4226	17.9015	10.5672
RchiOBHmChr2g0163781.gene	20.5546	15.5275	20.2134	11.1028	10.886	8.11571
RchiOBHmChr2g0163791.gene	11.7744	10.6785	12.0509	6.39822	6.44671	7.0605
RchiOBHmChr2g0163811.gene	0.323865	0.309672	0.266558	1.51591	0.896247	1.3485
RchiOBHmChr2g0163831.gene	1.97752	1.74652	2.21539	7.16812	7.49976	6.77839
RchiOBHmChr2g0163921.gene	130.566	119.773	122.383	25.1183	34.5433	25.5213
RchiOBHmChr2g0163981.gene	112.344	79.8077	82.0341	28.3806	41.149	32.0273
RchiOBHmChr2g0164051.gene	4.98242	4.68445	3.95956	12.5662	9.64889	13.7556
RchiOBHmChr2g0164561.gene	8.68797	4.49341	8.07389	24.5315	18.447	20.2798
RchiOBHmChr2g0164751.gene	22.9107	28.0785	27.7235	2.17646	3.47243	2.52157
RchiOBHmChr2g0164931.gene	27.5216	27.0637	28.7348	15.6261	17.6912	13.8384
RchiOBHmChr2g0165011.gene	1.91705	1.21023	1.29646	8.69579	9.67797	11.656
RchiOBHmChr2g0165171.gene	0.20493	0.23273	0.363038	5.73696	3.15485	2.89625
RchiOBHmChr2g0165301.gene	6.77949	4.6658	4.41847	16.913	18.8662	17.2004
RchiOBHmChr2g0165311.gene	0.433117	0.707981	0.655654	2.02902	1.62193	3.46193
RchiOBHmChr2g0165601.gene	222.171	232.96	246.062	60.8912	66.6012	96.1028
RchiOBHmChr2g0165831.gene	0.086791	0.158822	0.05324	1.30928	1.5678	1.48927
RchiOBHmChr2g0165841.gene	0.504706	0.520969	0.395902	8.0697	8.73197	5.8895
RchiOBHmChr2g0165891.gene	0.363365	0.085829	0.300084	1.08773	1.60671	0.735221
RchiOBHmChr2g0166071.gene	3.00814	1.54577	4.44801	0.376633	0.083704	0.24914
RchiOBHmChr2g0166211.gene	1.2815	1.27289	1.50923	10.5112	12.5023	10.3809
RchiOBHmChr2g0166331.gene	2.84039	2.61497	3.38736	22.7237	17.8627	14.8055
RchiOBHmChr2g0166491.gene	0.893602	0.639035	0.635536	4.68636	1.86137	3.44507
RchiOBHmChr2g0166581.gene	323.403	350.449	317.07	180.812	181.213	180.519
RchiOBHmChr2g0166661.gene	2.36104	2.03831	1.66091	5.25685	4.64044	5.34451
RchiOBHmChr2g0166901.gene	4.54071	3.9701	3.88788	8.65894	11.0907	12.4934
RchiOBHmChr2g0166941.gene	2.17613	1.59694	1.42848	7.02616	5.38843	6.16043
RchiOBHmChr2g0166971.gene	0.431715	0.433664	0.104178	1.71603	1.69886	1.67704
RchiOBHmChr2g0167241.gene	20.3768	17.7748	25.4897	1.97897	1.56785	1.45718
RchiOBHmChr2g0167251.gene	21.7204	27.2163	41.5811	1.32508	2.67416	1.0918
RchiOBHmChr2g0167291.gene	969.378	1303.76	1230.8	164.917	203.812	186.221
RchiOBHmChr2g0167371.gene	1.19847	0.798643	0.445039	5.6856	4.48083	4.36217
RchiOBHmChr2g0167461.gene	7.40128	6.4811	6.83422	41.3567	41.1397	67.1503
RchiOBHmChr2g0167471.gene	0.530626	0.380107	0.410295	1.75842	1.65427	1.59783
RchiOBHmChr2g0167701.gene	733.799	733.595	906.681	69.4538	105.097	60.1062
RchiOBHmChr2g0168331.gene	2.51638	3.12463	6.2995	10.487	9.30073	10.7269
RchiOBHmChr2g0168381.gene	1.24507	0.77855	0.895668	16.3521	9.61942	5.24951
RchiOBHmChr2g0168391.gene	1.24289	0.58452	0.792234	4.69499	4.37558	2.89628
RchiOBHmChr2g0168411.gene	1192.02	1233.92	1478.54	199.165	245.498	254.615
RchiOBHmChr2g0168671.gene	0.452618	0.735634	0.691561	2.56313	2.25951	1.56642
RchiOBHmChr2g0168751.gene	37.9946	41.2473	44.6231	280.756	325.256	222.359
RchiOBHmChr2g0168811.gene	93.8184	103.809	120.218	27.187	21.3552	29.984
RchiOBHmChr2g0168851.gene	72.9902	85.0798	95.9011	11.0312	10.438	11.1376
RchiOBHmChr2g0169121.gene	0.208776	0.129052	0.086688	0.95736	0.864528	0.751984
RchiOBHmChr2g0169131.gene	0.177399	0.237279	0.318098	2.79146	1.47906	4.60437
RchiOBHmChr2g0169231.gene	7.34865	5.71118	4.22787	35.9674	33.6851	25.8752
RchiOBHmChr2g0169241.gene	3.68734	3.7435	3.31767	11.8645	16.6882	12.837
RchiOBHmChr2g0169361.gene	5.14077	4.32528	4.30887	3.85728	3.09186	2.23119
RchiOBHmChr2g0169521.gene	7.68573	0	5.9665	19.4303	18.1949	14.1006
RchiOBHmChr2g0169621.gene	2.99343	2.68315	2.09951	0.878418	0.806807	0.483329
RchiOBHmChr2g0169631.gene	0.942288	1.27266	1.2733	0.116135	0.185725	0.218109
RchiOBHmChr2g0169761.gene	3.30431	3.16287	2.36054	13.3454	8.96504	7.5701
RchiOBHmChr2g0169841.gene	52.4681	67.5946	59.8041	20.6836	22.4945	27.4797
RchiOBHmChr2g0169981.gene	49.2307	55.0826	61.9352	25.7223	27.0796	25.7105
RchiOBHmChr2g0170521.gene	7.00841	7.03005	8.12323	25.1879	30.9243	23.2911
RchiOBHmChr2g0170551.gene	1.58048	1.38537	1.8167	6.66361	5.22277	4.96085
RchiOBHmChr2g0170581.gene	6.05414	5.6706	6.0447	20.5416	21.1167	18.8029
RchiOBHmChr2g0170631.gene	0.88328	0.494397	0.602217	2.08397	2.08498	3.15661
RchiOBHmChr2g0170871.gene	7.93637	9.36019	4.40524	2.11826	0	3.97614
RchiOBHmChr2g0170921.gene	8.16378	5.31689	6.86896	19.1802	17.1578	18.0494
RchiOBHmChr2g0171311.gene	11.5297	11.9937	13.4761	6.30169	2.57021	2.52915
RchiOBHmChr2g0171381.gene	6.00757	5.77768	5.87866	17.4696	14.4563	16.0205
RchiOBHmChr2g0171511.gene	18.4646	29.6831	16.1753	4.443	9.33801	3.45657
RchiOBHmChr2g0171531.gene	3.02975	3.48197	2.7582	7.574	5.83167	9.00176
RchiOBHmChr2g0171711.gene	52.7426	50.3452	59.2027	22.445	23.3904	22.6898
RchiOBHmChr2g0172181.gene	1.65667	2.76707	2.40115	7.14119	5.77905	7.34354
RchiOBHmChr2g0172231.gene	0.328211	0.083006	0.49122	3.2817	2.79057	2.2669
RchiOBHmChr2g0172331.gene	993.723	985.965	1127.66	146.766	170.863	175.258
RchiOBHmChr2g0172361.gene	0.959645	0.950553	0.532522	15.4701	6.10373	14.6819
RchiOBHmChr2g0172601.gene	4.16902	3.55668	3.01853	8.88055	8.70997	11.2772
RchiOBHmChr2g0172841.gene	32.7016	31.262	29.7607	25.9493	27.2037	21.1744
RchiOBHmChr2g0172871.gene	1.77637	1.15224	0.888689	0.279083	0.064025	0.263659
RchiOBHmChr2g0173121.gene	12.2755	9.90322	11.8948	6.33817	5.76612	5.42789
RchiOBHmChr2g0173131.gene	57.3134	60.1165	65.6167	28.9114	29.1764	31.7732
RchiOBHmChr2g0173421.gene	4.37393	4.85054	6.84758	2.42976	2.1816	3.33458
RchiOBHmChr2g0173561.gene	0.797864	0.757569	0.536121	4.67474	3.63453	2.41665
RchiOBHmChr2g0173611.gene	52.8381	55.9518	61.0012	19.3327	24.2527	17.6024
RchiOBHmChr2g0173681.gene	0.870228	0.554333	1.10554	11.7498	3.98341	10.476
RchiOBHmChr2g0173731.gene	0.651195	0.557351	0.958738	0.030946	0.029154	0.19088
RchiOBHmChr2g0173771.gene	1.82593	3.20436	2.74546	0.718985	0.893193	0.921475
RchiOBHmChr2g0173921.gene	0.177792	0.209623	0.181927	2.13738	1.88015	4.57769
RchiOBHmChr2g0173951.gene	34.0634	41.4187	41.985	1.83888	3.59935	2.92603
RchiOBHmChr2g0174041.gene	40.1097	53.7747	28.7161	12.868	26.409	13.9252
RchiOBHmChr2g0174111.gene	0.214332	0.25948	0.483474	2.3428	2.7021	1.82306
RchiOBHmChr2g0174421.gene	79.1652	85.7714	88.1634	23.4414	22.7343	26.5127
RchiOBHmChr2g0174431.gene	15.0145	9.57493	7.31531	38.9843	45.607	61.3714
RchiOBHmChr2g0174471.gene	2.71626	1.26336	1.04989	6.03526	7.0835	7.27044
RchiOBHmChr2g0174571.gene	13.3875	13.8796	14.0393	8.82812	6.61567	7.96975
RchiOBHmChr2g0174661.gene	0.858771	1.20402	1.62156	0.316383	0.32681	0.408571
RchiOBHmChr2g0174811.gene	1.55832	0.949744	1.49121	0.241052	0.844447	0.14406
RchiOBHmChr2g0174821.gene	0.170959	0.122578	0.117047	0.891103	0.6136	0.775699
RchiOBHmChr2g0174861.gene	0.09258	0.086704	0.167195	1.03919	1.34891	1.03981
RchiOBHmChr2g0174871.gene	2.29521	2.59199	2.04828	9.03284	5.80035	8.50095
RchiOBHmChr2g0174941.gene	2.2768	1.42481	1.17678	6.16978	6.97502	5.03564
RchiOBHmChr2g0175271.gene	2.41198	1.89561	1.92205	15.588	9.83068	23.1842
RchiOBHmChr2g0175491.gene	1.95372	1.46911	1.98646	0.694115	0.859425	0.101532
RchiOBHmChr2g0175591.gene	6.37292	6.55564	7.13894	35.0338	36.9135	29.5612
RchiOBHmChr2g0175871.gene	4.62077	7.95176	5.11676	2.54506	1.85899	2.50254
RchiOBHmChr2g0175951.gene	47.4274	46.9399	48.8463	25.7193	26.1052	29.0531
RchiOBHmChr2g0176091.gene	1.04816	0.510914	0.819648	10.1615	6.13234	3.79611
RchiOBHmChr2g0176241.gene	49.85	48.728	56.3327	27.4397	28.483	33.4607
RchiOBHmChr2g0176381.gene	0.346629	0.370046	0.379357	1.28139	1.59432	1.08723
RchiOBHmChr2g0176411.gene	3.07593	2.27808	4.20329	0	0.206715	0
RchiOBHmChr2g0176471.gene	7.72277	6.71744	5.29688	20.9263	26.4915	19.2286
RchiOBHmChr2g0176531.gene	66.5704	62.4356	63.8901	23.1696	31.4819	34.6205
RchiOBHmChr2g0176611.gene	6.23789	5.45484	6.13778	16.7688	11.2983	14.6297
RchiOBHmChr2g0176741.gene	14.5464	11.1226	10.5214	221.313	157.43	168.927
RchiOBHmChr3g0447401.gene	4.52172	4.42523	5.34052	40.5252	31.1939	34.7096
RchiOBHmChr3g0447431.gene	4.05261	3.90051	2.66628	16.4084	11.0146	8.0704
RchiOBHmChr3g0447721.gene	62.5776	68.236	66.858	35.0661	31.8329	34.1928
RchiOBHmChr3g0447741.gene	1.61844	0.911692	0.428836	15.0817	9.91737	10.7513
RchiOBHmChr3g0447751.gene	0.57152	0.527239	0.357808	11.1447	10.3231	11.1277
RchiOBHmChr3g0447921.gene	28.9616	26.2463	30.9166	131.194	89.7087	84.2942
RchiOBHmChr3g0447961.gene	32.4766	33.8373	34.1831	23.3779	16.9462	20.1261
RchiOBHmChr3g0447971.gene	4.20095	2.6635	2.62386	22.789	15.6385	12.0111
RchiOBHmChr3g0447981.gene	26.207	26.1063	29.7289	5.43245	6.02754	4.74146
RchiOBHmChr3g0448141.gene	0.656005	0.813729	0.995656	4.85175	3.46938	2.8502
RchiOBHmChr3g0448431.gene	5.80133	5.58338	5.37745	22.1613	17.0856	20.5433
RchiOBHmChr3g0448441.gene	0.883615	0.792629	1.21339	5.59527	5.19039	3.63427
RchiOBHmChr3g0448621.gene	4.01272	3.7399	4.0469	1.71084	1.34305	1.91429
RchiOBHmChr3g0448661.gene	7.97175	6.00775	5.98209	25.7861	37.5525	28.2257
RchiOBHmChr3g0448721.gene	8.21996	6.32289	7.33051	0.127641	0.604382	0.384295
RchiOBHmChr3g0448771.gene	7.97296	6.48538	7.21388	0	0	0
RchiOBHmChr3g0448871.gene	5.09832	3.17337	2.32944	30.5996	22.2052	32.9291
RchiOBHmChr3g0448921.gene	0.705077	0.640648	0.55854	5.01635	4.66016	5.57365
RchiOBHmChr3g0449221.gene	9.00775	7.90711	13.0205	6.59316	4.95191	6.22434
RchiOBHmChr3g0449301.gene	4.96	4.26433	6.45203	0.023805	0.111363	0.184701
RchiOBHmChr3g0449491.gene	0.328772	0.179173	0.218793	1.46751	1.34418	1.88976
RchiOBHmChr3g0449501.gene	1.31999	0.939585	0.794698	9.75041	6.6928	3.65495
RchiOBHmChr3g0449641.gene	1.58593	1.47916	1.64087	4.90605	5.8147	5.35618
RchiOBHmChr3g0449651.gene	0.547737	0.422388	0.478116	2.11219	1.15986	1.40025
RchiOBHmChr3g0449731.gene	8.62266	8.00746	6.7625	18.2634	20.7729	22.8692
RchiOBHmChr3g0450041.gene	9.64983	7.67171	7.12263	32.5505	35.0868	36.8068
RchiOBHmChr3g0450341.gene	8.04656	7.5832	4.7889	37.6718	38.4668	26.3686
RchiOBHmChr3g0450591.gene	2.19511	2.19108	1.54936	10.8546	10.9549	8.27553
RchiOBHmChr3g0451081.gene	159.909	115.179	140.055	34.8334	50.5566	46.0759
RchiOBHmChr3g0451111.gene	9.80237	7.16968	6.37434	27.2716	26.4776	29.2975
RchiOBHmChr3g0451261.gene	3.86548	4.61847	4.05769	2.34126	1.68976	2.11869
RchiOBHmChr3g0451351.gene	7.77039	8.79924	13.7684	2.66127	2.2719	4.77538
RchiOBHmChr3g0451421.gene	3.7079	4.68968	3.68819	19.4003	21.3916	18.8154
RchiOBHmChr3g0451921.gene	178.803	176.15	224.541	74.2303	69.5685	66.9667
RchiOBHmChr3g0451951.gene	99.5535	85.4839	94.9726	13.2615	27.548	26.5764
RchiOBHmChr3g0451971.gene	234.325	228.719	264.151	48.6567	84.5922	83.8854
RchiOBHmChr3g0452041.gene	3.45926	2.12874	2.31574	11.8338	15.1052	9.11658
RchiOBHmChr3g0452341.gene	2.58961	2.14272	1.90792	21.7402	17.38	16.8507
RchiOBHmChr3g0452381.gene	1.51263	2.3218	2.09234	0.683881	0.554198	0.745421
RchiOBHmChr3g0452481.gene	1.86537	1.36237	1.44443	4.53513	4.98064	5.4091
RchiOBHmChr3g0452561.gene	34.0269	15.2097	12.0923	194.158	117.823	187.268
RchiOBHmChr3g0452581.gene	40.0342	40.3354	43.0476	25.2641	22.2308	24.2796
RchiOBHmChr3g0452741.gene	33.4199	34.3277	36.8268	113.017	89.8074	68.6044
RchiOBHmChr3g0452931.gene	1.35011	2.25915	3.00432	0.663753	0.73582	0.46025
RchiOBHmChr3g0453001.gene	0.090792	0.180175	0.143975	2.29524	1.56549	0.887605
RchiOBHmChr3g0453101.gene	0.338409	0.090444	0.264216	1.2463	1.29257	1.66326
RchiOBHmChr3g0453121.gene	0.431571	0.574162	0.469761	1.52895	1.89093	1.1725
RchiOBHmChr3g0453141.gene	3.89556	4.07797	3.25083	12.0918	13.7778	11.5423
RchiOBHmChr3g0453171.gene	0	0	1.3495	4.67931	3.75361	1.92729
RchiOBHmChr3g0453341.gene	2.01981	1.31483	1.30818	0.35421	0.422354	0.433456
RchiOBHmChr3g0453421.gene	19.8558	18.8471	20.6138	9.83575	9.44932	11.2703
RchiOBHmChr3g0453441.gene	399.691	395.877	399.865	49.0068	72.3147	58.6764
RchiOBHmChr3g0453451.gene	637.309	654.127	658.143	228.357	252.979	243.593
RchiOBHmChr3g0453461.gene	28.2973	26.3096	29.4352	13.9797	17.1643	18.6002
RchiOBHmChr3g0453481.gene	2.14199	1.43817	1.45036	4.91108	4.56834	5.0315
RchiOBHmChr3g0453551.gene	4.64331	3.73703	3.11943	1.91373	1.14076	1.31138
RchiOBHmChr3g0453561.gene	0	0.357085	0.064639	1.59682	1.48483	1.94212
RchiOBHmChr3g0453571.gene	1.86981	0.792935	0.469047	4.73669	3.11686	2.77367
RchiOBHmChr3g0453601.gene	4.06082	5.29972	6.03625	1.79053	2.47943	2.1146
RchiOBHmChr3g0453671.gene	4.40968	4.75083	4.09984	20.8908	20.0104	10.0797
RchiOBHmChr3g0453761.gene	3.14664	2.90299	2.53562	3.07254	0.744079	2.43835
RchiOBHmChr3g0453781.gene	0	0	0	0.468712	0.311477	0.367167
RchiOBHmChr3g0453941.gene	11.1655	11.5895	12.658	1.63937	3.04899	2.59068
RchiOBHmChr3g0454041.gene	60.2348	80.2357	68.6929	28.9808	33.221	29.2599
RchiOBHmChr3g0454061.gene	7.89643	10.4476	10.7642	41.354	31.2865	27.0366
RchiOBHmChr3g0454261.gene	9.31026	8.58337	6.47387	30.0275	27.054	17.03
RchiOBHmChr3g0454311.gene	287.255	293.988	274.919	104.916	107.731	105.558
RchiOBHmChr3g0454321.gene	14.4864	15.9585	17.6494	6.14432	6.07641	5.71426
RchiOBHmChr3g0454411.gene	11.4806	12.5012	13.6992	46.5303	33.1399	21.5066
RchiOBHmChr3g0454461.gene	10.918	8.11768	7.32156	27.1955	25.3024	34.3418
RchiOBHmChr3g0454491.gene	0.516242	0.557062	0.341629	16.3293	11.8005	6.4526
RchiOBHmChr3g0454551.gene	1.40762	1.60635	2.79417	0.638183	0.491219	0.363208
RchiOBHmChr3g0454591.gene	109.835	131.273	114.055	39.8125	35.8696	37.459
RchiOBHmChr3g0454731.gene	0.453302	0.419565	0.559033	2.43316	3.88537	2.65498
RchiOBHmChr3g0454741.gene	0.511921	0.961465	0.713543	4.68902	5.92454	5.24034
RchiOBHmChr3g0454751.gene	1.92051	2.94666	2.11667	19.0478	18.1429	20.8086
RchiOBHmChr3g0454781.gene	0.995543	0.539121	0.831566	3.1706	2.62503	4.47159
RchiOBHmChr3g0455091.gene	0.119178	0.300882	0.256851	0.912883	0.755309	0.859742
RchiOBHmChr3g0455121.gene	29.457	20.8041	23.7695	49.7227	74.6041	75.3021
RchiOBHmChr3g0455191.gene	269.007	321.773	321.659	52.4542	53.1375	62.8614
RchiOBHmChr3g0455211.gene	1.97182	2.30213	2.09586	6.23512	7.70936	5.10758
RchiOBHmChr3g0455281.gene	25.59	28.7524	29.0468	11.4594	3.34646	13.6422
RchiOBHmChr3g0455321.gene	0.354353	0.070028	0.247963	2.07015	1.86748	1.52731
RchiOBHmChr3g0455491.gene	27.3412	28.7294	28.7695	62.5667	86.9293	74.9037
RchiOBHmChr3g0455601.gene	2.07524	2.35196	3.22453	1.01833	1.21065	0.929081
RchiOBHmChr3g0455691.gene	83.976	68.5803	69.108	26.9476	35.2566	45.9708
RchiOBHmChr3g0455841.gene	33.9205	31.1665	35.4349	13.7008	14.6122	22.3229
RchiOBHmChr3g0455881.gene	3.75249	3.02666	3.73389	1.5834	0.971616	0.224052
RchiOBHmChr3g0455951.gene	1.06658	0.975954	1.06591	4.83819	3.6382	3.78757
RchiOBHmChr3g0456601.gene	4.21863	3.99834	5.59168	1.09244	1.57691	1.37253
RchiOBHmChr3g0456621.gene	4.49888	4.50297	4.59221	0.292712	0.884489	1.15882
RchiOBHmChr3g0456641.gene	3.70997	3.28655	3.48482	1.83281	2.00561	1.42634
RchiOBHmChr3g0456691.gene	62.9849	69.9841	90.8749	24.9444	25.7806	30.6551
RchiOBHmChr3g0456811.gene	2.23107	2.09007	2.00136	6.19852	6.81377	5.6245
RchiOBHmChr3g0457031.gene	2.38147	2.37986	2.25867	1.35722	1.29669	1.06071
RchiOBHmChr3g0457221.gene	3.85161	4.44164	4.17402	11.9178	7.60185	12.5492
RchiOBHmChr3g0457251.gene	0.733087	0.911534	0.942986	3.25982	2.97436	2.3167
RchiOBHmChr3g0457261.gene	0.57228	0.309525	0.250829	2.1589	1.97723	1.78585
RchiOBHmChr3g0457401.gene	0.987154	0.429167	0.960029	2.27389	2.87964	3.80386
RchiOBHmChr3g0457431.gene	0	0.048223	0.062643	1.32285	1.03821	1.05287
RchiOBHmChr3g0457471.gene	0.97704	1.16099	1.67122	5.71314	5.83824	4.5529
RchiOBHmChr3g0457511.gene	2.8908	3.23322	3.8031	10.4675	9.41703	9.72788
RchiOBHmChr3g0457521.gene	64.0398	71.4079	80.4606	39.2767	31.2915	40.2354
RchiOBHmChr3g0457571.gene	1.00574	1.4935	1.06062	0.294883	0.406444	0.28484
RchiOBHmChr3g0457581.gene	50.6962	39.0037	54.8861	20.6523	19.4964	25.1585
RchiOBHmChr3g0457611.gene	4.36099	3.19458	3.26498	47.7516	39.9649	36.6824
RchiOBHmChr3g0457631.gene	5.13547	2.74221	2.06252	9.84102	17.0505	18.7548
RchiOBHmChr3g0457751.gene	2.2285	2.13214	2.20254	14.2465	17.1892	11.7762
RchiOBHmChr3g0457961.gene	6.84565	5.89638	6.24916	14.0314	16.3882	19.3991
RchiOBHmChr3g0458011.gene	5.44733	3.88409	6.36475	1.07874	1.83896	3.66556
RchiOBHmChr3g0458031.gene	5.65689	5.46731	5.39415	3.02422	2.4895	3.09978
RchiOBHmChr3g0458361.gene	6.42779	5.76748	5.30584	24.5731	18.6479	23.3856
RchiOBHmChr3g0458371.gene	11.4613	8.85652	11.9548	5.23721	4.56938	6.55488
RchiOBHmChr3g0458411.gene	1.75456	1.38183	1.41325	3.94861	4.09742	3.95758
RchiOBHmChr3g0458521.gene	42.4641	46.922	45.9839	28.5713	26.908	23.2515
RchiOBHmChr3g0458531.gene	2.66909	2.16404	1.40443	6.73196	6.39489	4.62095
RchiOBHmChr3g0458541.gene	7.95355	8.76041	5.83134	78.9394	59.719	31.0039
RchiOBHmChr3g0458631.gene	407.252	348.552	336.851	76.2433	97.3628	122.176
RchiOBHmChr3g0458651.gene	5.00378	2.59643	2.56032	0.183873	0.555292	0.126263
RchiOBHmChr3g0458741.gene	0	0	0	0.588802	1.01998	0.794648
RchiOBHmChr3g0458761.gene	67.753	48.456	35.6846	137.62	149.408	137.475
RchiOBHmChr3g0458971.gene	4.18032	1.12282	3.07462	0.028166	0.214848	0.202058
RchiOBHmChr3g0458981.gene	2.2145	1.56946	1.80973	8.7362	8.9226	10.6757
RchiOBHmChr3g0459001.gene	51.931	44.5959	44.0658	125.078	137.469	125.305
RchiOBHmChr3g0459081.gene	11.6698	10.6416	10.3281	46.9789	40.2489	44.8848
RchiOBHmChr3g0459231.gene	0.876556	0.758353	0.654008	4.09958	3.94133	3.4674
RchiOBHmChr3g0459271.gene	26.7874	28.2343	22.8503	10.5112	10.1077	10.8109
RchiOBHmChr3g0459331.gene	33.8607	32.2816	36.3007	10.1031	16.3515	13.9085
RchiOBHmChr3g0459391.gene	2.33475	2.73024	3.18385	21.4722	22.3085	18.7291
RchiOBHmChr3g0459571.gene	16.6352	15.0749	15.4473	0.825122	2.34018	1.48601
RchiOBHmChr3g0459661.gene	6.52206	3.05684	4.18122	14.498	24.1294	18.6167
RchiOBHmChr3g0459681.gene	19.0039	24.7185	16.0938	12.095	11.0686	10.1419
RchiOBHmChr3g0459711.gene	13.2754	12.8461	15.3001	1.22875	1.99185	1.72126
RchiOBHmChr3g0460071.gene	3.29945	2.76744	2.51817	15.4783	14.2901	14.2115
RchiOBHmChr3g0460081.gene	1.52998	1.78995	0.902475	10.8608	10.4486	4.63991
RchiOBHmChr3g0460271.gene	1.4078	1.71243	1.59833	6.14845	4.36854	5.40187
RchiOBHmChr3g0460321.gene	0.616395	0.677577	0.44436	2.53076	4.2346	3.05298
RchiOBHmChr3g0460441.gene	0.563761	0.659436	0.689909	2.98191	1.87417	1.81221
RchiOBHmChr3g0460521.gene	10.6413	14.5015	13.6163	9.03543	7.51095	7.97979
RchiOBHmChr3g0460541.gene	315.209	388.114	618.091	25.3971	39.8962	27.3905
RchiOBHmChr3g0460591.gene	2462.98	2611.06	2416.49	595.562	745.682	593.421
RchiOBHmChr3g0460681.gene	0.418167	0.33478	0.086361	0.892191	1.23866	1.40404
RchiOBHmChr3g0460771.gene	0.665843	0.472298	0.635861	2.84743	2.8327	2.12801
RchiOBHmChr3g0460971.gene	4.08549	3.40129	2.7657	13.4552	14.6235	10.0787
RchiOBHmChr3g0461001.gene	3.01463	1.49216	1.76408	15.8097	20.9108	20.1295
RchiOBHmChr3g0461091.gene	909.061	881.739	691.792	242.794	303.91	275.058
RchiOBHmChr3g0461351.gene	216.18	246.901	211.579	69.7946	81.4169	64.2205
RchiOBHmChr3g0461451.gene	2.16636	1.64079	1.68608	5.64734	6.02255	5.32295
RchiOBHmChr3g0461461.gene	20.9816	19.5039	21.7119	6.50742	7.83974	7.45071
RchiOBHmChr3g0461491.gene	36.4624	29.3109	27.2267	16.4203	9.53162	16.6718
RchiOBHmChr3g0461571.gene	22.0709	23.7327	19.4993	10.4429	10.7792	10.007
RchiOBHmChr3g0461661.gene	0.865547	0.525378	0.73408	6.75382	6.78545	5.98573
RchiOBHmChr3g0461701.gene	26.1322	25.9364	17.0498	4.57908	4.24119	6.22104
RchiOBHmChr3g0461811.gene	1113.82	1353.9	1453.1	569.781	771.709	489.748
RchiOBHmChr3g0461821.gene	152.146	135.565	152.39	24.1745	34.3806	26.1824
RchiOBHmChr3g0461831.gene	285.758	282.909	256.427	96.7835	104.275	91.1623
RchiOBHmChr3g0461981.gene	2.28194	2.04234	2.43397	1.36664	1.16501	1.34326
RchiOBHmChr3g0462061.gene	71.0706	62.1342	59.6305	30.3343	34.3537	18.0134
RchiOBHmChr3g0462351.gene	0.859173	0.682204	0.775224	21.0944	15.4184	10.254
RchiOBHmChr3g0462401.gene	55.4994	34.2423	56.2971	0.973409	1.63403	2.12934
RchiOBHmChr3g0462411.gene	27.9958	17.9263	35.8521	1.39672	0.164392	1.8656
RchiOBHmChr3g0462421.gene	37.4297	26.3846	45.4116	1.18202	0.37452	1.71124
RchiOBHmChr3g0462631.gene	10.4819	10.0635	11.0425	30.7439	30.0312	26.8508
RchiOBHmChr3g0462781.gene	6.8675	5.09741	6.5152	18.6528	15.2775	14.8027
RchiOBHmChr3g0462841.gene	336.029	365.245	355.313	124.304	134.949	111.926
RchiOBHmChr3g0462851.gene	396.328	454.927	474.156	169.925	185.583	176.141
RchiOBHmChr3g0462911.gene	1.01056	0.377827	0.711976	4.12893	2.77967	2.12789
RchiOBHmChr3g0462961.gene	83.0297	99.2438	98.7793	25.2469	41.4917	9.37702
RchiOBHmChr3g0463131.gene	10.6855	6.68448	8.74315	0.133117	0.52796	0
RchiOBHmChr3g0463191.gene	14.708	16.7651	8.91808	173.583	112.901	93.7479
RchiOBHmChr3g0463261.gene	6.69741	6.95297	6.13275	3.12011	2.31408	3.10604
RchiOBHmChr3g0463511.gene	8.41208	9.50855	8.53601	32.3996	26.8015	27.3999
RchiOBHmChr3g0463591.gene	25.5903	25.9425	33.6366	8.86746	9.76703	13.1052
RchiOBHmChr3g0463771.gene	4.28534	4.34814	5.65348	1.61961	2.33414	2.68388
RchiOBHmChr3g0463791.gene	1.04027	0.735105	1.09873	0.565827	0.389444	0.173244
RchiOBHmChr3g0463831.gene	10.9161	13.6788	12.2208	3.62774	4.76388	3.74917
RchiOBHmChr3g0463931.gene	0.504734	0.174013	0.314726	1.19933	1.37635	1.29383
RchiOBHmChr3g0464071.gene	4.16847	3.70512	2.80314	11.5413	12.2037	12.8364
RchiOBHmChr3g0464121.gene	40.3318	35.9791	31.6282	147.309	150.185	129.698
RchiOBHmChr3g0464191.gene	3.26207	2.71022	2.02501	31.396	26.7516	26.0187
RchiOBHmChr3g0464421.gene	0.946226	1.56558	0.660666	8.0682	3.86314	5.68675
RchiOBHmChr3g0464511.gene	19.3525	13.8904	12.4864	58.5055	63.6826	38.7624
RchiOBHmChr3g0464521.gene	0.294878	0	0.3099	1.85862	1.3871	1.3667
RchiOBHmChr3g0464551.gene	0.7568	0.826618	0.867741	3.31182	3.40438	3.13201
RchiOBHmChr3g0464631.gene	10.4311	11.7328	12.3833	5.12096	5.8819	4.60448
RchiOBHmChr3g0464641.gene	83.2793	80.7859	91.1459	35.1916	46.4964	49.054
RchiOBHmChr3g0464731.gene	4.38953	3.87066	3.63307	9.48581	10.8019	10.0963
RchiOBHmChr3g0464771.gene	3.70172	4.79068	3.69519	10.9946	14.5533	9.4856
RchiOBHmChr3g0464891.gene	3.65313	4.68243	4.85598	10.497	11.3584	12.2589
RchiOBHmChr3g0464901.gene	0.731626	0.270928	0.235326	1.40296	1.47036	2.30395
RchiOBHmChr3g0465091.gene	2.58316	3.99112	3.80676	0.824138	0.672707	1.38337
RchiOBHmChr3g0465231.gene	11.4344	8.66974	11.2783	4.51309	4.26568	3.64485
RchiOBHmChr3g0465241.gene	0.213994	0.288669	0.133584	1.53747	1.76039	1.93602
RchiOBHmChr3g0465351.gene	7.42752	3.48497	5.06358	13.8961	16.2248	12.0393
RchiOBHmChr3g0465491.gene	38.6498	38.8986	30.7675	16.9013	16.9326	13.8159
RchiOBHmChr3g0465641.gene	0.086708	0	0.029906	3.34968	1.73069	2.19028
RchiOBHmChr3g0466011.gene	1.36799	1.50533	1.51076	3.67496	3.87234	4.65595
RchiOBHmChr3g0466071.gene	10.0515	6.37638	7.72945	26.7301	27.1924	32.1854
RchiOBHmChr3g0466201.gene	5.32535	5.1244	3.80748	0.299345	0.55052	0.203258
RchiOBHmChr3g0466241.gene	2.51587	1.59596	1.66521	14.163	10.5894	8.11197
RchiOBHmChr3g0466311.gene	2.25011	1.6156	2.07006	0.917845	0.281304	0.626818
RchiOBHmChr3g0466361.gene	12.1243	8.68335	8.28834	38.2191	32.5923	30.477
RchiOBHmChr3g0466461.gene	2310.05	2979.34	3581.97	735.131	818.566	1023.03
RchiOBHmChr3g0466641.gene	0.94727	0.825247	1.02274	0.566585	0.386217	0.369934
RchiOBHmChr3g0466911.gene	10.0379	10.72	8.37896	28.9686	27.7684	26.3358
RchiOBHmChr3g0467001.gene	0.257837	0.113712	0.037111	0.883952	0.878739	0.54115
RchiOBHmChr3g0467231.gene	13.1379	10.4762	12.2529	91.385	94.7431	94.797
RchiOBHmChr3g0467381.gene	0.620289	1.02392	1.19669	3.46536	1.48559	3.03288
RchiOBHmChr3g0467431.gene	5.59193	4.61974	5.08946	1.8339	2.22969	1.55165
RchiOBHmChr3g0467551.gene	1.51373	1.29462	1.55868	12.6657	12.4717	11.877
RchiOBHmChr3g0467721.gene	5.16359	5.83216	4.52764	29.9435	29.8635	25.2822
RchiOBHmChr3g0467751.gene	32.2271	33.1924	34.5368	16.6582	18.3912	17.3822
RchiOBHmChr3g0467761.gene	40.5577	45.6872	46.1403	28.4316	20.0483	23.8387
RchiOBHmChr3g0467831.gene	1.4212	1.4098	1.59098	0.600025	0.946793	0.603348
RchiOBHmChr3g0467851.gene	0.21574	0.28739	0.323537	0.714316	1.23031	1.28298
RchiOBHmChr3g0467901.gene	10.7339	8.55743	8.02399	30.0158	34.7449	27.4828
RchiOBHmChr3g0467961.gene	1.76294	1.73333	2.33097	0.602531	0.58986	0.20197
RchiOBHmChr3g0468101.gene	46.7237	59.8848	64.7865	22.9988	28.413	18.7679
RchiOBHmChr3g0468121.gene	51.3035	53.1044	66.8504	17.2373	19.8532	18.4616
RchiOBHmChr3g0468281.gene	14.3376	11.0652	10.2965	5.43367	5.00919	5.23631
RchiOBHmChr3g0468461.gene	23.4498	23.5347	24.9491	4.20516	5.96282	9.34108
RchiOBHmChr3g0468481.gene	0.793353	0.821704	0.564015	3.81945	2.85234	4.24968
RchiOBHmChr3g0468711.gene	1.15603	1.22717	1.54364	4.56583	3.75832	6.04627
RchiOBHmChr3g0468811.gene	0.07629	0.38471	0.160582	2.23067	2.66	1.34424
RchiOBHmChr3g0468921.gene	146.685	143.885	136.659	86.4331	72.9633	76.4289
RchiOBHmChr3g0469031.gene	8.11658	4.45437	7.62664	2.21846	2.05119	2.31169
RchiOBHmChr3g0469061.gene	5.9788	6.13912	4.82827	17.1713	14.8215	12.8136
RchiOBHmChr3g0469211.gene	2.41671	3.41509	2.95442	0.331921	1.14635	0.53339
RchiOBHmChr3g0469401.gene	1.42879	1.43916	1.87731	0.331361	0.581084	0.179382
RchiOBHmChr3g0469591.gene	6.09836	4.5896	4.28878	22.2911	21.8956	19.1493
RchiOBHmChr3g0469701.gene	2.5334	2.58247	2.9697	1.54931	0.976508	1.18861
RchiOBHmChr3g0469771.gene	32.0845	33.8413	31.3476	93.6675	91.32	104.997
RchiOBHmChr3g0469781.gene	1.10046	1.62656	1.48838	0.519235	0.565378	0.591654
RchiOBHmChr3g0469861.gene	1.52259	1.26582	2.26457	5.81212	4.3392	5.58664
RchiOBHmChr3g0469901.gene	218.222	214.461	223.556	121.933	135.921	135.36
RchiOBHmChr3g0470021.gene	4.09067	5.57016	4.43399	17.8281	20.6643	17.854
RchiOBHmChr3g0470161.gene	41.4521	35.6145	35.46	106.265	100.817	84.5777
RchiOBHmChr3g0470171.gene	1.0667	0.928582	0.820955	5.62715	2.85265	3.78353
RchiOBHmChr3g0470361.gene	16.9119	13.696	15.1319	7.28744	7.9574	6.63936
RchiOBHmChr3g0470381.gene	0.235984	0.249641	0.066311	1.01171	0.844243	1.00953
RchiOBHmChr3g0470401.gene	0.139616	0.179256	0.371143	4.29252	2.81175	6.52358
RchiOBHmChr3g0470461.gene	12.2183	10.8976	9.49357	116.314	112.319	141.734
RchiOBHmChr3g0470701.gene	459.587	582.687	592.427	131.78	145.69	133.573
RchiOBHmChr3g0470831.gene	7.31747	7.31856	4.75368	2.55342	3.43216	3.9361
RchiOBHmChr3g0470911.gene	65.5847	76.6228	73.1003	35.5139	41.5726	43.5373
RchiOBHmChr3g0470981.gene	27.1808	13.9587	5.78798	1004.72	775.245	717.632
RchiOBHmChr3g0471191.gene	4.97202	3.93648	4.29744	0.960936	1.92661	1.09621
RchiOBHmChr3g0471231.gene	2.28211	1.99734	2.51742	4.66643	5.46898	6.64248
RchiOBHmChr3g0471421.gene	6.85378	6.47935	9.26503	3.25703	2.60143	2.8428
RchiOBHmChr3g0471611.gene	0.924145	0.92522	1.31524	3.63938	2.80603	3.88763
RchiOBHmChr3g0471661.gene	18.9552	17.8321	19.7481	7.36316	6.01829	6.29415
RchiOBHmChr3g0471771.gene	63.8549	55.1966	93.1431	0	3.30485	0.758013
RchiOBHmChr3g0471981.gene	13.5664	14.3292	13.0525	34.2804	40.9957	31.8891
RchiOBHmChr3g0472081.gene	8.25015	9.53973	7.73597	23.1891	15.0742	25.1208
RchiOBHmChr3g0472201.gene	4.37859	6.06251	4.4979	9.61669	12.2537	15.7664
RchiOBHmChr3g0472371.gene	7.16457	9.71079	7.00553	13.7348	22.231	19.5278
RchiOBHmChr3g0472421.gene	33.7642	37.2249	39.8573	21.7306	19.8934	20.7127
RchiOBHmChr3g0472511.gene	38.2652	42.4362	37.0895	24.1556	25.9141	20.9487
RchiOBHmChr3g0472641.gene	4.49825	3.72441	3.86017	14.6982	16.5025	14.6341
RchiOBHmChr3g0472661.gene	2.67142	2.8186	2.75601	9.63433	5.96261	5.84682
RchiOBHmChr3g0472851.gene	57.9656	52.5175	56.7739	30.2174	30.989	32.0813
RchiOBHmChr3g0472961.gene	5.72644	5.90916	4.89114	2.09619	2.15719	2.74165
RchiOBHmChr3g0473161.gene	0.481108	0.958947	0.798927	6.4295	6.36469	7.16172
RchiOBHmChr3g0473181.gene	0.445643	0.231725	0.254828	2.42688	2.67537	1.64036
RchiOBHmChr3g0473551.gene	1.45579	1.45312	2.27363	0.347079	0.403668	0.674815
RchiOBHmChr3g0473601.gene	12.1446	12.7209	11.8381	58.0353	45.0252	41.2505
RchiOBHmChr3g0473661.gene	18.6515	16.4798	19.3376	9.49119	9.79365	11.8881
RchiOBHmChr3g0473671.gene	10.4095	8.53921	9.29715	4.12715	3.94289	2.92236
RchiOBHmChr3g0473831.gene	55.6642	65.9851	70.9969	29.6229	27.4297	27.9806
RchiOBHmChr3g0474331.gene	1.21802	1.3057	1.89673	10.3448	8.96931	8.42348
RchiOBHmChr3g0474341.gene	0.30763	0.406932	0.238615	0.787879	0.993259	1.39636
RchiOBHmChr3g0474581.gene	101.835	99.3348	99.714	42.4253	54.4298	45.8066
RchiOBHmChr3g0474601.gene	0.341438	0.37699	0.162984	0.983289	0.767239	1.02703
RchiOBHmChr3g0474621.gene	0.34703	0.704956	0.776775	10.9407	7.20117	8.93256
RchiOBHmChr3g0474691.gene	5.22914	6.07231	5.53334	17.5057	16.9949	12.5012
RchiOBHmChr3g0474771.gene	1.50824	1.39884	1.25903	8.33214	10.0512	4.41672
RchiOBHmChr3g0474871.gene	18.254	16.143	20.9822	5.72766	5.39459	6.25008
RchiOBHmChr3g0474931.gene	42.8372	39.1148	41.3239	13.0125	11.9748	12.7804
RchiOBHmChr3g0474951.gene	1.94347	2.65357	2.77199	1.00579	0	1.03857
RchiOBHmChr3g0475101.gene	21.9109	21.8351	23.8055	7.8957	8.24144	9.49548
RchiOBHmChr3g0475481.gene	4.87259	6.17627	7.10315	22.9325	24.2707	20.7552
RchiOBHmChr3g0475571.gene	0.438586	0.650664	0.515858	1.70839	1.80669	1.75408
RchiOBHmChr3g0475661.gene	13.4894	14.1766	5.07286	130.582	78.7854	43.8257
RchiOBHmChr3g0475851.gene	23.0922	23.1065	21.8768	10.4978	13.8841	17.0868
RchiOBHmChr3g0475921.gene	6.10722	4.99842	6.12442	20.2732	21.1308	15.8663
RchiOBHmChr3g0476321.gene	3.34806	2.31666	1.34898	37.9929	24.1048	15.188
RchiOBHmChr3g0476401.gene	1.85884	2.2889	2.17241	1.68853	0.172108	0.634562
RchiOBHmChr3g0476871.gene	0.825393	0.860035	0.449051	2.37913	3.29123	2.78392
RchiOBHmChr3g0477261.gene	5.95584	6.73498	6.51007	2.61113	3.49529	2.83502
RchiOBHmChr3g0477361.gene	223.431	245.763	249.408	82.4549	87.9649	85.5045
RchiOBHmChr3g0477391.gene	20.985	21.7261	23.8792	53.5708	58.2112	67.4971
RchiOBHmChr3g0477411.gene	1.18551	1.5008	1.79304	4.59362	3.16962	4.98
RchiOBHmChr3g0477521.gene	7.49153	4.04747	7.1921	0.868363	2.85978	2.78732
RchiOBHmChr3g0478651.gene	0.071688	0.051108	0	2.57979	1.40464	2.57995
RchiOBHmChr3g0478731.gene	6.99814	7.63551	6.81403	3.00673	3.00332	1.98372
RchiOBHmChr3g0478901.gene	1335.68	1617.29	1691.27	143.956	185.23	158.215
RchiOBHmChr3g0479301.gene	4.56856	3.329	3.83405	11.236	8.32882	11.1035
RchiOBHmChr3g0479361.gene	2.00796	1.48729	2.16788	11.7823	13.2003	11.0069
RchiOBHmChr3g0479651.gene	116.632	114.163	126.82	68.2605	55.5524	67.0774
RchiOBHmChr3g0479681.gene	1.56804	2.19046	2.96235	10.2712	8.36359	10.3901
RchiOBHmChr3g0479821.gene	2.94964	2.05078	2.65368	8.25094	5.00429	5.84925
RchiOBHmChr3g0479831.gene	0.426473	0.239611	0.331237	1.37946	2.30161	0.67698
RchiOBHmChr3g0480311.gene	2.10014	2.23596	1.59485	13.9665	11.6299	8.85753
RchiOBHmChr3g0480651.gene	0.871462	0.971245	1.4503	0.316633	0.523032	0.226307
RchiOBHmChr3g0480751.gene	44.6647	47.6974	46.2088	23.977	19.6413	16.8892
RchiOBHmChr3g0480801.gene	52.2743	58.8044	70.4016	21.4505	30.5534	24.5438
RchiOBHmChr3g0480901.gene	0.517846	1.01155	0.989465	4.99119	4.37767	3.46
RchiOBHmChr3g0480981.gene	537.436	445.582	458.638	84.8162	99.8605	123.235
RchiOBHmChr3g0480991.gene	2.19674	2.06308	3.16519	1.47521	1.30821	0.917267
RchiOBHmChr3g0482071.gene	15.0529	10.7522	11.1766	74.2674	49.9648	61.4418
RchiOBHmChr3g0482101.gene	0.818696	0.494877	1.72015	7.01012	6.4887	6.58188
RchiOBHmChr3g0482331.gene	4.42701	4.61582	4.06688	18.4404	11.7064	16.7766
RchiOBHmChr3g0482601.gene	6.10233	5.98028	5.5179	17.4388	17.5976	18.4998
RchiOBHmChr3g0482661.gene	5.86752	6.13365	5.80773	16.982	16.9084	13.793
RchiOBHmChr3g0482741.gene	1.67117	0.663229	1.6017	7.22796	5.58154	6.98227
RchiOBHmChr3g0483011.gene	6.82368	6.85029	7.40205	19.6161	13.878	20.3282
RchiOBHmChr3g0483201.gene	40.2725	37.0041	42.5378	27.0789	17.9623	15.0605
RchiOBHmChr3g0483481.gene	0.760088	1.62504	0.831901	2.91236	2.63999	2.24194
RchiOBHmChr3g0483571.gene	30.7329	29.133	31.6764	13.2557	11.5653	16.9436
RchiOBHmChr3g0483671.gene	10.3539	7.95886	11.601	0.608289	0.063125	1.65418
RchiOBHmChr3g0483711.gene	8.27207	5.97023	11.8905	0.039626	0.696516	0.570785
RchiOBHmChr3g0484051.gene	4.14605	0.493437	2.31595	12.2344	9.55152	16.2583
RchiOBHmChr3g0484151.gene	0.50438	0.414264	0.650969	2.87874	3.60035	3.33389
RchiOBHmChr3g0484161.gene	61.6445	28.6913	39.9588	308.583	321.747	330.738
RchiOBHmChr3g0484171.gene	90.8509	45.3159	65.814	438.02	451.281	461.502
RchiOBHmChr3g0484251.gene	9.63099	7.76801	7.94336	52.0344	29.6069	27.779
RchiOBHmChr3g0484561.gene	0.377874	0.281671	0.223658	0.997639	0.75343	1.1506
RchiOBHmChr3g0484631.gene	0.058802	0	0	1.51861	1.25798	1.53884
RchiOBHmChr3g0484861.gene	1.03428	1.11747	0.729369	6.39014	5.0436	3.86162
RchiOBHmChr3g0485301.gene	25.4898	0.146799	33.2927	53.2412	66.7734	70.4648
RchiOBHmChr3g0485561.gene	236.192	197.817	202.595	43.3902	59.2668	58.2231
RchiOBHmChr3g0485621.gene	11.409	11.5131	9.03439	68.4329	63.5922	44.0431
RchiOBHmChr3g0485631.gene	19.0881	16.4489	15.0782	40.7997	52.4545	31.689
RchiOBHmChr3g0485711.gene	0.079918	0	0	2.41392	1.3142	1.91958
RchiOBHmChr3g0485751.gene	0.444774	0.313986	0.630275	4.22364	5.03332	2.99397
RchiOBHmChr3g0486001.gene	219.312	245.627	228.293	63.0325	97.966	105.192
RchiOBHmChr3g0486551.gene	0.102276	0.010887	0.043504	0.573728	0.76594	0.512481
RchiOBHmChr3g0486601.gene	2.59911	1.94235	2.38846	11.5069	11.3385	9.84399
RchiOBHmChr3g0486711.gene	0.577462	0.502991	0	2.62837	2.77059	2.40112
RchiOBHmChr3g0487011.gene	57.8083	58.2423	60.1066	22.1082	30.9233	24.9841
RchiOBHmChr3g0487331.gene	1.04214	0.601718	0.82689	5.15875	3.52683	3.26393
RchiOBHmChr3g0487431.gene	14.1682	15.1621	12.7656	6.22745	8.20511	7.94747
RchiOBHmChr3g0487571.gene	48.3853	50.8732	49.913	22.8337	31.6323	24.1038
RchiOBHmChr3g0487591.gene	4.89813	4.23298	3.50666	16.6213	12.7946	15.5042
RchiOBHmChr3g0487651.gene	42.3777	41.998	42.917	27.9381	30.1482	6.99916
RchiOBHmChr3g0487781.gene	1.0552	1.26616	0.886523	4.20069	3.57324	4.25673
RchiOBHmChr3g0487811.gene	0.430223	0.186778	0.15681	1.58754	1.73662	1.75396
RchiOBHmChr3g0488501.gene	1.03862	1.02976	0.828033	5.92736	5.54653	3.93649
RchiOBHmChr3g0488551.gene	25.7522	37.0058	42.0695	17.791	14.9113	27.1252
RchiOBHmChr3g0488651.gene	1.51138	2.02405	2.25779	0.422973	0.637595	0.10853
RchiOBHmChr3g0488691.gene	0.992808	1.06254	0.593284	2.67335	2.52863	4.26643
RchiOBHmChr3g0488711.gene	16.7627	17.2774	16.7392	7.39323	8.68244	8.76494
RchiOBHmChr3g0488721.gene	2.55798	2.72702	3.55183	1.13451	0.661292	1.48483
RchiOBHmChr3g0488771.gene	4.7701	6.07872	4.42052	18.0529	20.9771	13.2236
RchiOBHmChr3g0488811.gene	20.7141	23.3614	29.8776	2.45531	5.44635	7.20559
RchiOBHmChr3g0488951.gene	0.491097	0.689804	0.356393	1.68928	1.38095	2.20431
RchiOBHmChr3g0490571.gene	15.9851	18.4842	18.0875	7.76352	11.9144	11.6657
RchiOBHmChr3g0490581.gene	1.46994	1.285	1.32808	5.85181	4.43124	3.44304
RchiOBHmChr3g0490671.gene	2.05648	1.45836	1.60232	4.79729	4.09958	4.59733
RchiOBHmChr3g0491061.gene	1.6921	1.74623	1.60825	6.97935	7.73994	5.4332
RchiOBHmChr3g0491161.gene	1.13381	1.03037	1.23708	3.96394	4.57437	4.03769
RchiOBHmChr3g0491191.gene	102.127	89.1937	95.2151	297.331	243.594	222.651
RchiOBHmChr3g0491431.gene	0	0.279361	0.498471	2.10561	1.93163	2.57444
RchiOBHmChr3g0491591.gene	3.65407	4.49453	4.21806	11.2515	9.31378	11.5573
RchiOBHmChr3g0491651.gene	17.4072	14.715	10.2192	65.1257	63.7239	40.8935
RchiOBHmChr3g0491861.gene	3.70204	3.17857	4.76858	10.2293	8.20594	10.5579
RchiOBHmChr3g0492361.gene	0.150231	0.09876	0.135155	2.61075	2.55755	1.98128
RchiOBHmChr3g0492641.gene	3.14849	4.26529	4.37368	2.13226	1.83016	2.38307
RchiOBHmChr3g0493051.gene	6.76901	7.272	7.45778	19.3949	18.2716	17.5882
RchiOBHmChr3g0493091.gene	14.0486	13.2812	16.044	36.7829	40.9107	34.2911
RchiOBHmChr3g0493151.gene	0.705806	0.454377	0.405198	3.1922	3.29491	1.9592
RchiOBHmChr3g0493181.gene	40.6433	35.7726	45.158	16.1919	14.1426	13.2354
RchiOBHmChr3g0493451.gene	0.331882	0.350775	0.58194	1.60319	2.01978	1.32003
RchiOBHmChr3g0493521.gene	3.17355	2.40543	3.93893	0.708207	1.60248	1.08977
RchiOBHmChr3g0493581.gene	24.0605	20.5246	22.8813	9.4626	9.9022	10.8514
RchiOBHmChr3g0493591.gene	5.74569	5.57275	5.5571	2.79344	1.49628	1.54862
RchiOBHmChr3g0494361.gene	23.3712	24.6434	26.6223	85.7394	71.6219	53.9301
RchiOBHmChr3g0494481.gene	7.22444	7.13307	7.57641	22.2653	16.3347	19.6704
RchiOBHmChr3g0494731.gene	360.613	387.848	408.339	114.394	121.229	110.592
RchiOBHmChr3g0494961.gene	6.1765	5.04636	4.11758	20.9502	21.2234	17.2875
RchiOBHmChr3g0495491.gene	1.91544	2.38019	2.1314	1.24423	1.39345	1.21418
RchiOBHmChr3g0495741.gene	2.53132	3.18419	2.8193	9.72604	10.7953	13.2819
RchiOBHmChr3g0495891.gene	0.474995	0.6586	0.514927	2.83568	2.50613	3.09887
RchiOBHmChr3g0495971.gene	0.356108	0.292221	0.298164	2.20017	2.28046	1.97481
RchiOBHmChr3g0495981.gene	11.3499	10.4945	11.1843	6.15593	5.90804	7.18066
RchiOBHmChr3g0496111.gene	1.96453	2.30537	1.87317	10.3991	9.23331	10.2192
RchiOBHmChr3g0496511.gene	864.665	972.197	1226.38	491.711	552.787	531.33
RchiOBHmChr3g0496681.gene	0.712755	0.563749	0.502789	6.8474	5.52184	6.80687
RchiOBHmChr3g0496751.gene	54.6836	36.6588	36.6849	253.513	420.76	219.473
RchiOBHmChr3g0496791.gene	0.858667	0.855581	1.22771	0.277739	0.365356	0.223158
RchiOBHmChr3g0496871.gene	32.0066	28.5125	32.438	85.2461	76.3981	71.7862
RchiOBHmChr3g0497011.gene	8.51624	5.78309	5.8121	63.3532	81.9344	65.4758
RchiOBHmChr3g0497021.gene	0.474284	0.346304	0.44582	3.41748	2.34001	2.70557
RchiOBHmChr3g0497071.gene	32.3624	30.9774	31.1157	18.5089	18.9062	16.7755
RchiOBHmChr3g0497191.gene	0.504216	0.777434	0.642349	2.98602	3.42542	2.92002
RchiOBHmChr3g0497321.gene	7.59422	7.95925	7.55641	3.66812	3.22862	3.14597
RchiOBHmChr4g0384761.gene	0.169793	0.160079	0.13993	1.15827	0.926808	0.64428
RchiOBHmChr4g0384831.gene	29.8284	26.0883	20.8008	12.5144	11.6329	14.7926
RchiOBHmChr4g0384861.gene	1.67867	1.47194	1.70482	0.760994	0.631186	0.612078
RchiOBHmChr4g0386001.gene	22.1764	24.2136	24.4044	15.6917	13.437	14.0107
RchiOBHmChr4g0386021.gene	22.4637	19.1059	22.9123	7.85954	7.85418	9.96099
RchiOBHmChr4g0386051.gene	33.4099	33.0496	31.7474	12.2051	15.0151	12.0772
RchiOBHmChr4g0386271.gene	4.53476	4.91354	4.05531	2.10707	3.14389	0.620714
RchiOBHmChr4g0387361.gene	1.54675	2.52923	2.02052	4.55181	5.23532	4.94404
RchiOBHmChr4g0387371.gene	1.72849	1.19956	1.56679	13.5006	10.507	9.88536
RchiOBHmChr4g0387381.gene	44.8841	52.8358	51.4983	18.6674	21.6323	18.4529
RchiOBHmChr4g0387451.gene	1.87127	1.97086	0.658882	4.85215	4.91071	3.72563
RchiOBHmChr4g0387661.gene	0.26223	0.351192	0.416997	1.461	1.96487	1.55453
RchiOBHmChr4g0387751.gene	23.2953	19.2081	20.5062	8.67999	11.4808	10.0731
RchiOBHmChr4g0387791.gene	443.107	489.637	548.203	37.8886	70.9939	171.029
RchiOBHmChr4g0387801.gene	54.389	45.1742	47.0922	2.56493	5.65095	14.025
RchiOBHmChr4g0388021.gene	1.20504	0.863974	0.859632	3.62908	3.41342	3.2309
RchiOBHmChr4g0388101.gene	111.353	104.656	121.914	12.6263	17.6561	15.8526
RchiOBHmChr4g0388421.gene	0.485451	0.207517	0.505932	3.05215	1.72946	2.0232
RchiOBHmChr4g0388741.gene	5.58478	6.83556	8.23865	1.9851	2.74698	2.34271
RchiOBHmChr4g0388831.gene	5.85811	4.92742	4.83394	1.1281	1.81539	1.33664
RchiOBHmChr4g0388921.gene	1.24511	1.09587	1.17977	5.58889	5.13456	5.8907
RchiOBHmChr4g0388941.gene	9.74191	6.9587	6.24243	25.6344	26.2325	30.8785
RchiOBHmChr4g0388951.gene	4.36011	3.71184	3.08837	12.2106	8.58109	10.4739
RchiOBHmChr4g0389531.gene	1.06682	1.32735	1.4451	11.1867	6.4744	9.1946
RchiOBHmChr4g0389561.gene	7.64928	8.06818	8.95202	21.927	24.068	21.5298
RchiOBHmChr4g0389621.gene	235.415	172.808	180.668	95.9318	107.268	131.209
RchiOBHmChr4g0389671.gene	4.06747	2.10712	1.38796	8.2326	7.42173	6.10492
RchiOBHmChr4g0389701.gene	6.23633	9.01709	7.90791	3.47986	4.81836	4.47665
RchiOBHmChr4g0390011.gene	3.00453	3.46968	3.30016	9.21008	8.30051	9.73045
RchiOBHmChr4g0390271.gene	4.68689	5.67751	4.8198	13.1374	13.0752	12.2091
RchiOBHmChr4g0390501.gene	5.47605	4.99166	5.32966	16.8234	13.4165	9.34495
RchiOBHmChr4g0391161.gene	24.1355	24.8587	26.0517	12.5063	8.6727	13.5793
RchiOBHmChr4g0391351.gene	7.93454	8.70587	8.21587	0.505929	0.536602	0.888879
RchiOBHmChr4g0391831.gene	6.15462	5.58667	5.54148	1.87269	1.96118	2.0562
RchiOBHmChr4g0391841.gene	7.3394	4.81041	5.24348	2.54836	1.73587	1.6211
RchiOBHmChr4g0392361.gene	0.735127	0.660896	0.905101	0.433165	0.161509	0.366305
RchiOBHmChr4g0392431.gene	2.93002	3.28624	3.04539	16.7428	14.7395	15.7057
RchiOBHmChr4g0392501.gene	0.088486	0.04713	0.188332	2.18579	5.61676	3.9682
RchiOBHmChr4g0392511.gene	2.12298	1.42429	1.24618	8.05745	6.31491	8.59189
RchiOBHmChr4g0392631.gene	6.32996	6.05503	3.85861	114.739	116.853	112.521
RchiOBHmChr4g0392711.gene	103.293	210.082	179.066	17.9708	28.3699	20.1639
RchiOBHmChr4g0392941.gene	249.171	283.233	267.798	139.227	154.38	138.852
RchiOBHmChr4g0393031.gene	0.316032	0.345011	0.04296	1.63592	1.62448	1.60516
RchiOBHmChr4g0393301.gene	2.90482	2.78472	3.16938	8.92486	7.58585	8.64035
RchiOBHmChr4g0393931.gene	0.088373	0.217574	0.422765	3.16083	2.93403	2.45592
RchiOBHmChr4g0393941.gene	1.50165	2.01977	1.11521	3.64365	4.24749	3.77187
RchiOBHmChr4g0394191.gene	41.2456	37.595	37.0624	10.3029	10.652	13.2495
RchiOBHmChr4g0394251.gene	1.66487	2.35019	2.1292	9.19617	10.7934	8.56682
RchiOBHmChr4g0394291.gene	1.63736	1.65602	1.62426	4.37984	5.33017	4.35052
RchiOBHmChr4g0394321.gene	1.50636	1.23725	2.79191	0.37279	0.324802	0.692102
RchiOBHmChr4g0394701.gene	18.3405	14.8426	15.2684	48.468	38.3768	54.2185
RchiOBHmChr4g0394711.gene	0.293405	0.150584	0.257636	1.46079	2.54963	2.66592
RchiOBHmChr4g0394721.gene	0.585669	0.209647	0.48322	5.56438	4.27656	7.34475
RchiOBHmChr4g0394781.gene	0.187486	0.432789	0.383341	4.42048	4.92094	4.81469
RchiOBHmChr4g0394991.gene	11.825	15.4538	15.116	4.36818	4.1102	5.56737
RchiOBHmChr4g0395141.gene	18.0003	15.0248	16.6204	3.97804	5.76416	3.82826
RchiOBHmChr4g0395381.gene	1.12182	0.911731	0.821411	2.55779	2.54704	3.12768
RchiOBHmChr4g0395401.gene	2.62409	1.74243	1.96269	6.60152	5.84948	4.0071
RchiOBHmChr4g0395451.gene	2.11886	2.51197	2.5826	16.8263	11.8162	10.54
RchiOBHmChr4g0395521.gene	0.20468	0	0.085193	0.625728	1.30606	1.20762
RchiOBHmChr4g0395811.gene	1.24574	0.615103	0.970671	3.79664	3.23276	3.34201
RchiOBHmChr4g0396151.gene	466.41	463.654	485.503	188.631	342.126	201.883
RchiOBHmChr4g0396171.gene	2.02691	1.62779	1.17778	31.4559	24.4155	14.1528
RchiOBHmChr4g0396381.gene	12.2031	9.59764	8.5547	34.262	27.7602	32.7131
RchiOBHmChr4g0396391.gene	8.90627	5.98504	1.55718	22.9731	24.5957	24.4572
RchiOBHmChr4g0396691.gene	0.647572	0.57342	0.623678	3.74777	2.58365	2.54916
RchiOBHmChr4g0396881.gene	0.951124	1.00359	1.00662	2.64546	3.10739	2.00521
RchiOBHmChr4g0396921.gene	316.739	343.836	468.536	173.267	94.345	240.479
RchiOBHmChr4g0397001.gene	0.173646	0.245937	0.1273	2.43987	2.85082	1.33158
RchiOBHmChr4g0397111.gene	1.15295	0.419842	0.488258	14.0155	9.46766	10.265
RchiOBHmChr4g0397171.gene	0.753229	0.708436	0.529541	6.01084	6.22783	5.0604
RchiOBHmChr4g0397901.gene	0.466242	0.329716	0.477018	2.18232	1.62461	1.4571
RchiOBHmChr4g0398061.gene	3.81956	2.89598	3.47743	1.37681	1.80633	0.741191
RchiOBHmChr4g0398071.gene	2.65523	3.18498	2.89472	1.85553	1.57767	1.43985
RchiOBHmChr4g0398131.gene	5.4898	5.82301	5.49146	17.8123	14.8439	14.4641
RchiOBHmChr4g0398291.gene	3.08107	2.74861	3.27169	9.37041	9.79045	6.12738
RchiOBHmChr4g0398431.gene	0.778584	0.926829	0.492479	3.18648	3.0256	3.22884
RchiOBHmChr4g0398551.gene	0.216431	0.530073	0.681503	1.70915	1.31954	2.30944
RchiOBHmChr4g0398631.gene	25.5605	12.3015	5.98228	541.792	496.841	479.255
RchiOBHmChr4g0399211.gene	1.52751	0.608297	1.34766	50.3104	41.801	14.369
RchiOBHmChr4g0399451.gene	0.217472	0.953705	0.557457	3.1346	2.4886	2.46915
RchiOBHmChr4g0399481.gene	0.166212	0.101753	0.243175	5.15697	4.54905	7.2779
RchiOBHmChr4g0399661.gene	0.744263	0.250646	0.286156	6.40076	2.91915	4.24074
RchiOBHmChr4g0399741.gene	65.4382	74.1167	82.2696	24.3078	23.0776	22.0353
RchiOBHmChr4g0399751.gene	104.796	113.897	116.668	34.4247	44.4304	32.9884
RchiOBHmChr4g0399891.gene	2.35001	1.76723	2.10262	12.2554	9.46914	9.07398
RchiOBHmChr4g0400101.gene	11.0981	13.0556	17.98	7.87939	7.67427	4.82722
RchiOBHmChr4g0400181.gene	0.44636	0.323498	0.552295	1.75285	1.52819	1.41687
RchiOBHmChr4g0400891.gene	0.443578	0.306623	0.30616	1.47472	1.93311	1.80326
RchiOBHmChr4g0401121.gene	0	0	1.15747	3.19467	1.7455	2.65766
RchiOBHmChr4g0401201.gene	4.52896	4.42971	4.30419	19.8479	14.0699	14.0802
RchiOBHmChr4g0401361.gene	0.492699	0.32649	0.395148	2.90567	3.15707	1.74034
RchiOBHmChr4g0401521.gene	4.04714	3.11182	3.21371	9.5982	10.0329	7.98815
RchiOBHmChr4g0402501.gene	3.58876	1.08212	1.6669	12.4955	12.2269	10.4207
RchiOBHmChr4g0402581.gene	3.95692	3.46515	3.1663	9.53494	9.7062	7.69663
RchiOBHmChr4g0402891.gene	9.73677	3.78921	2.49385	38.3181	30.0955	16.1326
RchiOBHmChr4g0402981.gene	3.86326	4.37422	2.5328	17.2858	8.07739	10.345
RchiOBHmChr4g0403051.gene	0.266585	0.289557	0.326225	1.34306	0.748888	1.35435
RchiOBHmChr4g0403461.gene	0.790087	0.613094	0.619742	4.49862	4.88123	4.25024
RchiOBHmChr4g0403501.gene	2.18566	1.86259	1.61679	0.544981	0.578951	0.610056
RchiOBHmChr4g0403651.gene	0.25978	0.196254	0.049677	3.33602	2.83648	2.31923
RchiOBHmChr4g0403671.gene	0.774961	0.689136	0.298194	1.81011	2.89466	2.72632
RchiOBHmChr4g0403841.gene	168.571	205.548	195.504	48.3213	106.884	103.784
RchiOBHmChr4g0404641.gene	4.52205	3.07159	3.05837	19.6677	22.445	16.3893
RchiOBHmChr4g0404881.gene	0.211979	0.168141	0.167974	1.06909	0.710573	0.91889
RchiOBHmChr4g0404971.gene	27.7364	19.3663	12.0286	278.284	237.315	298.438
RchiOBHmChr4g0405141.gene	2.4218	2.74191	2.00829	5.30066	6.64522	7.90745
RchiOBHmChr4g0405301.gene	9.18594	7.85181	7.71593	23.2968	25.6002	19.7432
RchiOBHmChr4g0405381.gene	0.469049	0.721852	0.803669	3.50226	3.61366	2.96566
RchiOBHmChr4g0405441.gene	18.4435	22.2771	27.2517	10.0954	7.80237	8.9276
RchiOBHmChr4g0405731.gene	1.13375	0.867328	1.43017	0.234867	0.393959	0.081809
RchiOBHmChr4g0405961.gene	23.2076	22.9029	18.9483	79.5616	65.0822	58.8984
RchiOBHmChr4g0406061.gene	1.35032	1.37627	1.08983	4.79813	3.65123	4.06335
RchiOBHmChr4g0406221.gene	35.052	27.1679	12.1624	574.872	638.888	667.666
RchiOBHmChr4g0406231.gene	10.6338	8.54228	4.82037	93.6409	97.9394	92.6863
RchiOBHmChr4g0406271.gene	16.4895	16.292	12.2782	41.6911	42.503	59.4161
RchiOBHmChr4g0406441.gene	21.9314	27.1298	29.4262	13.3949	12.78	11.9111
RchiOBHmChr4g0406651.gene	6.52238	5.18399	3.17145	60.9181	34.6803	29.0356
RchiOBHmChr4g0406801.gene	2.38053	2.59889	2.56834	30.3139	26.8115	28.686
RchiOBHmChr4g0407481.gene	3.55224	3.31858	3.40826	10.8706	10.3891	11.8066
RchiOBHmChr4g0408131.gene	4.90965	4.18489	5.06054	11.5476	11.5985	12.365
RchiOBHmChr4g0408441.gene	0.116684	0.198903	0.145589	4.77417	5.43428	3.38241
RchiOBHmChr4g0408611.gene	2.09077	1.72435	1.6129	8.13623	5.32982	5.20901
RchiOBHmChr4g0408721.gene	0.951581	0.522939	0.459634	5.48664	4.76729	6.35116
RchiOBHmChr4g0408891.gene	0.509086	0.427302	0.567302	1.8592	1.82625	1.64878
RchiOBHmChr4g0409201.gene	4.76133	2.8522	2.9104	1.71821	0.648213	0.745845
RchiOBHmChr4g0409581.gene	29.6314	21.9395	16.219	11.8083	13.8076	10.7224
RchiOBHmChr4g0409641.gene	1.18792	1.17031	1.0807	7.01855	6.95557	6.35501
RchiOBHmChr4g0409791.gene	0.959443	0.332113	0.282991	15.053	10.8721	15.5748
RchiOBHmChr4g0409991.gene	3.50116	4.11475	4.26969	1.26789	0.529463	1.98258
RchiOBHmChr4g0411011.gene	7.43687	8.6774	6.63033	61.2265	42.2781	37.7769
RchiOBHmChr4g0411541.gene	3.58262	3.09981	4.37705	11.1828	10.8305	9.09893
RchiOBHmChr4g0411571.gene	34.5129	37.1351	41.9761	18.2934	21.3985	18.2377
RchiOBHmChr4g0412101.gene	0.842684	1.15883	1.0469	4.51419	5.4068	4.14494
RchiOBHmChr4g0412151.gene	0.922055	0.570415	0.706754	2.15005	1.65678	1.97295
RchiOBHmChr4g0412331.gene	17.7664	15.607	18.3903	6.25608	9.1853	5.08348
RchiOBHmChr4g0412691.gene	4.20581	3.15008	3.68732	9.25877	10.8286	13.3456
RchiOBHmChr4g0412831.gene	2.00466	2.34659	2.12022	7.58365	6.70984	6.8102
RchiOBHmChr4g0413021.gene	0.712117	1.31398	4.29846	0.452749	0.415683	0.320016
RchiOBHmChr4g0413131.gene	2.90638	3.09932	3.56101	0.192967	0.887098	2.28607
RchiOBHmChr4g0413231.gene	0.512862	0.43918	0.302386	2.14678	1.22573	0.917031
RchiOBHmChr4g0413621.gene	1499.44	1853.33	1802.16	926.213	998.044	1161.08
RchiOBHmChr4g0413891.gene	0.223972	0.148146	0.159087	0.986909	0.606327	0.52568
RchiOBHmChr4g0414021.gene	1.71676	1.841	2.0197	8.16541	5.29676	5.68924
RchiOBHmChr4g0414721.gene	0.865823	1.36566	0.85808	2.86432	3.51487	3.8563
RchiOBHmChr4g0414921.gene	0	0.120614	0	3.14169	2.60955	3.56347
RchiOBHmChr4g0414931.gene	0.341411	0.565291	0.295839	5.01208	3.79703	7.45319
RchiOBHmChr4g0414961.gene	4.28264	6.51792	5.66591	103.326	82.877	115.278
RchiOBHmChr4g0415231.gene	3.25022	1.93906	2.67516	0.488203	1.03686	1.9066
RchiOBHmChr4g0415261.gene	0.587677	0.486016	0.401143	1.45429	1.81548	1.29607
RchiOBHmChr4g0415271.gene	1.80594	1.1498	1.66595	0.939497	0.378811	0.69594
RchiOBHmChr4g0415391.gene	7.06229	8.13041	4.81933	18.0202	21.2952	18.0704
RchiOBHmChr4g0415601.gene	1.34737	0.867953	1.16521	0.154825	0.473034	0.521653
RchiOBHmChr4g0415811.gene	30.9597	32.9579	31.7336	17.2128	15.9928	22.6042
RchiOBHmChr4g0415821.gene	182.36	171.905	180.517	59.5569	63.5232	82.9871
RchiOBHmChr4g0415861.gene	0.160622	0.329984	0.236551	1.9851	2.46376	2.5138
RchiOBHmChr4g0415871.gene	0.365474	0.422158	0.597265	1.38642	1.43856	1.95203
RchiOBHmChr4g0416241.gene	0.745338	0.311295	0.155666	2.04474	2.16601	2.04446
RchiOBHmChr4g0416341.gene	38.8449	38.3654	43.4783	23.4604	19.7002	22.5984
RchiOBHmChr4g0416361.gene	4.85433	7.18675	4.57619	15.4045	13.9476	22.4825
RchiOBHmChr4g0416501.gene	0.536411	0.628075	0.580054	3.67958	2.53979	2.67727
RchiOBHmChr4g0416531.gene	0.37244	0.122189	0.210871	1.24989	1.48217	0.720689
RchiOBHmChr4g0416551.gene	25.7679	27.8316	28.1	8.28962	10.5049	7.90448
RchiOBHmChr4g0416631.gene	14.3597	14.7937	10.1057	1.77163	1.78061	1.07548
RchiOBHmChr4g0416801.gene	1.55888	1.92704	2.59221	0.270883	0.210132	0.22004
RchiOBHmChr4g0417161.gene	8.50834	10.9956	11.9415	2.84878	3.66109	8.07655
RchiOBHmChr4g0417171.gene	2.52885	3.08512	3.75197	11.2878	10.1937	9.78935
RchiOBHmChr4g0417191.gene	3.39452	3.62187	4.22743	1.28619	1.35138	1.24445
RchiOBHmChr4g0417271.gene	4.86776	3.48647	4.38012	11.5438	10.0653	8.67651
RchiOBHmChr4g0417331.gene	0.37602	0.816147	0.571408	3.19093	2.19347	2.02198
RchiOBHmChr4g0417511.gene	18.6372	18.0522	21.2956	3.93856	2.67107	4.47231
RchiOBHmChr4g0418291.gene	13.1244	11.1421	13.3921	6.8529	7.02269	5.88948
RchiOBHmChr4g0418311.gene	165.269	178.423	101.005	95.3964	21.6873	83.7178
RchiOBHmChr4g0418441.gene	3.57069	2.28154	1.48678	35.9464	40.7005	43.166
RchiOBHmChr4g0418571.gene	1.70046	0.302765	1.3997	7.14045	6.92122	4.05445
RchiOBHmChr4g0418961.gene	0.95883	0.63469	0.729793	3.97224	3.64035	1.83551
RchiOBHmChr4g0419001.gene	40.9413	29.4213	39.6214	26.6452	7.24944	9.93893
RchiOBHmChr4g0419011.gene	18.9333	18.3425	18.3339	103.752	88.4647	82.9033
RchiOBHmChr4g0419021.gene	1.8859	1.62372	2.29787	0	0.401874	0.411189
RchiOBHmChr4g0419271.gene	52.7737	57.3965	59.1133	30.527	33.6055	29.9175
RchiOBHmChr4g0420411.gene	16.749	18.943	19.393	5.31376	6.74761	8.06688
RchiOBHmChr4g0420481.gene	6.38107	6.77877	6.90443	30.222	24.832	18.3397
RchiOBHmChr4g0420821.gene	0.427912	0.370689	0.313799	1.09736	1.02629	1.72833
RchiOBHmChr4g0420851.gene	0.958548	0.844537	1.17397	3.93441	3.25863	4.22403
RchiOBHmChr4g0421171.gene	35.4268	28.9263	24.5548	195.428	144.789	238.706
RchiOBHmChr4g0421181.gene	0.459733	0.154912	0.109799	8.74251	6.64582	9.50115
RchiOBHmChr4g0421311.gene	55.405	59.4483	62.2263	36.1487	33.681	33.5808
RchiOBHmChr4g0421361.gene	33.9676	30.8004	45.6648	14.7742	16.3	17.189
RchiOBHmChr4g0421381.gene	15.8722	8.49292	25.1657	1.46684	2.12474	2.69966
RchiOBHmChr4g0421391.gene	21.4214	19.0197	33.2694	1.20115	4.32245	4.10814
RchiOBHmChr4g0421431.gene	2.44151	3.08751	2.99863	8.33769	7.53896	6.8446
RchiOBHmChr4g0421451.gene	1.13601	1.74784	1.42013	5.1338	4.21474	4.90526
RchiOBHmChr4g0422011.gene	27.9173	23.8145	19.2675	84.9509	95.6661	104.876
RchiOBHmChr4g0422101.gene	4.36635	3.69779	3.81941	12.254	14.1627	11.2202
RchiOBHmChr4g0422271.gene	2.88059	2.81533	2.65614	10.0896	8.47396	9.97911
RchiOBHmChr4g0422361.gene	0.952622	1.36986	1.35891	9.3806	11.2942	6.83882
RchiOBHmChr4g0422421.gene	83.6823	85.5483	79.5818	43.3475	48.8213	46.9692
RchiOBHmChr4g0422531.gene	3.87171	2.93335	3.85202	0.934383	0.696329	1.08542
RchiOBHmChr4g0422791.gene	0.560833	0.339362	0.504908	1.1994	1.21846	1.63375
RchiOBHmChr4g0423011.gene	12.1863	11.9877	12.5786	6.95034	5.3848	5.98333
RchiOBHmChr4g0423071.gene	0.211246	0.189875	0.278979	0.806355	0.830724	0.7534
RchiOBHmChr4g0423121.gene	35.904	38.1735	53.7055	5.8878	8.68323	2.5139
RchiOBHmChr4g0423301.gene	1.37099	1.07353	0	3.26004	4.92424	3.69164
RchiOBHmChr4g0423321.gene	3.56019	5.1613	4.46334	0.834831	0.706363	1.47521
RchiOBHmChr4g0423341.gene	1.87304	1.44567	2.06559	4.28841	4.79601	4.8196
RchiOBHmChr4g0423401.gene	117.622	121.962	136.116	51.1826	56.8766	51.8385
RchiOBHmChr4g0423411.gene	1.60596	0.965705	1.33244	0.024382	0.202397	0.106346
RchiOBHmChr4g0423471.gene	4.37913	2.70752	4.50346	0.914928	0.664524	0.587103
RchiOBHmChr4g0423511.gene	9.35975	5.4359	7.56414	3.16079	3.06776	4.31533
RchiOBHmChr4g0423521.gene	30.1328	34.0399	43.1994	13.6655	12.9727	10.6164
RchiOBHmChr4g0423661.gene	1.47884	0.827549	0.299137	6.86452	5.50152	8.1793
RchiOBHmChr4g0423711.gene	9.22612	6.02697	3.16667	23.0251	26.5054	30.1621
RchiOBHmChr4g0423721.gene	0.056922	0.052376	2.1149	9.65455	8.95718	13.2993
RchiOBHmChr4g0423771.gene	3.91921	3.23596	3.64003	1.93176	1.53814	1.46698
RchiOBHmChr4g0423821.gene	13.8175	17.2763	15.8564	9.24318	7.1836	11.0511
RchiOBHmChr4g0423881.gene	154.672	51.8472	59.8073	715.156	498.175	609.064
RchiOBHmChr4g0423901.gene	81.6532	37.5803	46.5413	329.332	426.905	477.435
RchiOBHmChr4g0423941.gene	283.708	101.286	143.609	1684.65	1525.96	2025.4
RchiOBHmChr4g0424011.gene	43.9415	34.2514	31.9079	110.158	150.485	165.822
RchiOBHmChr4g0424221.gene	5.40217	4.51879	3.38839	42.0095	24.571	14.4514
RchiOBHmChr4g0424251.gene	8.71098	9.46815	8.93191	25.3438	29.0337	23.8764
RchiOBHmChr4g0424381.gene	156.013	65.1796	46.7345	685.777	574.341	592.795
RchiOBHmChr4g0424411.gene	10.0306	7.11848	8.97802	4.18241	4.35405	4.03257
RchiOBHmChr4g0424511.gene	0.479569	0.204352	0.125061	5.57338	5.7935	3.76783
RchiOBHmChr4g0424631.gene	58.4215	61.6786	55.1376	30.213	32.4067	29.0083
RchiOBHmChr4g0424701.gene	146.318	113.46	137.465	33.5279	37.7064	41.3683
RchiOBHmChr4g0424721.gene	114.555	119.454	128.079	63.1196	63.3887	77.0434
RchiOBHmChr4g0424771.gene	395.437	355.34	338.929	94.4322	213.525	146.99
RchiOBHmChr4g0424811.gene	105.291	103.934	104.731	59.439	58.9276	64.9935
RchiOBHmChr4g0424821.gene	0.476935	0.442896	0.42663	3.69644	3.03247	3.18865
RchiOBHmChr4g0424871.gene	50.0766	52.3952	34.4273	29.6184	25.1486	13.4352
RchiOBHmChr4g0424881.gene	23.1806	17.9367	16.5023	7.76779	8.77928	8.8166
RchiOBHmChr4g0425101.gene	1.031	1.19496	1.17613	3.8342	3.42301	4.59249
RchiOBHmChr4g0425351.gene	89.3898	94.2296	87.9653	35.7267	47.322	40.3634
RchiOBHmChr4g0425561.gene	50.0528	34.0378	28.9092	16.7345	13.1747	28.0418
RchiOBHmChr4g0425781.gene	255.506	291.28	288.16	151.845	146.971	162.908
RchiOBHmChr4g0425801.gene	5.25496	2.9511	3.58329	21.0234	17.8204	16.2061
RchiOBHmChr4g0425861.gene	24.3888	23.2558	27.6626	6.83113	7.75475	11.6368
RchiOBHmChr4g0425991.gene	5.62011	5.44324	6.51638	2.04594	2.53577	3.11258
RchiOBHmChr4g0426001.gene	722.038	616.757	874.59	115.977	147.849	122.644
RchiOBHmChr4g0426051.gene	30.7549	23.1591	29.4097	2.3342	5.37914	3.25527
RchiOBHmChr4g0426061.gene	4.79815	4.62698	5.05774	14.9619	15.9199	13.5586
RchiOBHmChr4g0426121.gene	0.174259	0.168816	0.382783	1.35968	1.2	0.842876
RchiOBHmChr4g0426131.gene	40.0866	40.1052	35.6385	19.8637	20.1945	22.1377
RchiOBHmChr4g0426181.gene	2.76682	3.0408	1.88443	23.0066	15.4314	25.3748
RchiOBHmChr4g0426261.gene	1.94378	1.26989	1.06484	0.072369	0.722869	0.306002
RchiOBHmChr4g0426381.gene	0.103827	0.273141	0.136683	1.49759	1.12607	0.95229
RchiOBHmChr4g0426551.gene	6.73424	6.88131	6.73033	3.41493	4.03815	4.04793
RchiOBHmChr4g0426661.gene	3.06246	3.10487	2.74822	9.61515	8.02443	8.13262
RchiOBHmChr4g0426741.gene	0.98858	1.09114	0.989371	6.06595	6.52524	5.36039
RchiOBHmChr4g0427041.gene	0.985284	1.05587	1.20065	0.217906	0.887157	0
RchiOBHmChr4g0427101.gene	1327	1330.75	1608.15	540.674	968.08	818.555
RchiOBHmChr4g0427331.gene	4.68945	4.22083	3.97994	19.6755	17.0824	16.7743
RchiOBHmChr4g0427341.gene	151.39	151.777	158.414	96.9116	75.971	100.565
RchiOBHmChr4g0427421.gene	83.158	91.4451	82.5203	38.5162	44.1774	36.2589
RchiOBHmChr4g0427681.gene	0.387198	0.26942	0.323308	1.33739	1.36566	1.25211
RchiOBHmChr4g0427991.gene	31.6899	30.7063	56.3588	9.09064	13.2558	8.87015
RchiOBHmChr4g0428031.gene	3.07625	1.73327	2.20076	8.10797	10.6348	15.2227
RchiOBHmChr4g0428121.gene	1.87404	1.28622	1.29655	5.21194	4.99055	5.87183
RchiOBHmChr4g0428131.gene	7.41047	5.09989	6.01106	38.1343	28.2915	30.0539
RchiOBHmChr4g0428311.gene	16.9914	20.6977	16.4318	9.79251	7.92511	9.26187
RchiOBHmChr4g0428351.gene	7652.32	7843.12	6840.44	2669.79	2975.29	3352.74
RchiOBHmChr4g0428471.gene	8.54722	9.69818	8.92275	4.42072	4.63327	4.7528
RchiOBHmChr4g0428541.gene	0.697076	0.702076	0.765733	1.84547	2.17123	2.47297
RchiOBHmChr4g0428561.gene	3.17147	0.963241	0.845981	4.9483	5.21358	7.80804
RchiOBHmChr4g0428781.gene	5.25012	6.41441	6.5269	3.38804	3.22584	3.73367
RchiOBHmChr4g0428811.gene	0.76742	0.558051	1.11859	0.334139	0.264805	0.377803
RchiOBHmChr4g0428931.gene	0.040026	0.030768	0.099785	0.396843	0.900143	0.685614
RchiOBHmChr4g0428941.gene	6.26352	4.80383	5.41289	26.4513	27.6269	21.0999
RchiOBHmChr4g0429011.gene	13.0575	8.13311	7.58944	83.847	60.1017	41.9484
RchiOBHmChr4g0429301.gene	2.35446	2.76899	2.30008	11.7123	12.2556	11.0007
RchiOBHmChr4g0429311.gene	4.38014	2.18218	2.27051	7.56761	12.4811	10.5385
RchiOBHmChr4g0429491.gene	127.436	140.474	149.693	72.5799	85.4792	76.093
RchiOBHmChr4g0429611.gene	1.58383	1.6927	2.18409	5.03707	4.796	6.37671
RchiOBHmChr4g0429651.gene	6.99925	7.34946	7.43976	20.9947	18.529	15.8535
RchiOBHmChr4g0429831.gene	7.43759	6.31964	5.09042	1.227	0.81585	0.733188
RchiOBHmChr4g0429911.gene	3.5732	1.57102	2.68581	10.1728	13.7343	12.7306
RchiOBHmChr4g0430251.gene	32.2482	33.6393	33.5027	13.23	21.2663	18.7554
RchiOBHmChr4g0430431.gene	0.345471	0.1887	0.377746	2.51391	2.28817	0.832328
RchiOBHmChr4g0430671.gene	41.4268	51.6923	42.3281	15.0134	15.4797	25.4286
RchiOBHmChr4g0430851.gene	23.4381	16.7353	19.5324	8.64966	9.2028	9.70146
RchiOBHmChr4g0431031.gene	21.1187	25.452	20.8089	12.1559	13.0161	11.8231
RchiOBHmChr4g0431051.gene	10.3337	10.2168	15.9198	2.23719	2.54829	2.47935
RchiOBHmChr4g0431281.gene	11.6087	5.60697	5.20886	21.9634	24.8548	27.3097
RchiOBHmChr4g0431631.gene	0.261453	0.237758	0.28777	6.94254	8.4873	4.64268
RchiOBHmChr4g0431671.gene	0.855328	1.16078	1.39825	6.41582	6.89507	4.73424
RchiOBHmChr4g0431711.gene	3.38249	4.43664	6.19863	0.288302	0.460794	0.462201
RchiOBHmChr4g0431731.gene	4.75824	4.4593	6.46927	3.66708	1.97002	2.08071
RchiOBHmChr4g0431851.gene	0.324908	0.037132	0	1.3204	1.69424	2.37254
RchiOBHmChr4g0431881.gene	3.52837	1.67906	1.00187	5.88424	5.49838	6.34759
RchiOBHmChr4g0431921.gene	5.37889	2.27418	6.61606	0.093993	0.3528	0.148994
RchiOBHmChr4g0431931.gene	0.530977	0.396753	0.601379	2.3237	3.06386	2.45226
RchiOBHmChr4g0432291.gene	26.3201	22.5761	49.6528	8.54354	9.0051	6.49939
RchiOBHmChr4g0432411.gene	20.3484	23.4776	24.6535	12.6932	14.5551	12.2505
RchiOBHmChr4g0432611.gene	0.787777	0.659246	0.746105	0.168565	0.287306	0.124233
RchiOBHmChr4g0432681.gene	3.25113	2.39505	3.7373	6.76862	9.0059	8.84904
RchiOBHmChr4g0432761.gene	18.7611	17.511	15.9228	72.3802	58.2012	64.3259
RchiOBHmChr4g0432771.gene	0.19791	0.568018	0.260751	2.6505	3.03035	2.4987
RchiOBHmChr4g0432901.gene	1.8944	1.34273	1.21002	3.67487	3.54547	4.2787
RchiOBHmChr4g0432971.gene	4.32442	4.25708	4.86045	13.3796	11.4825	10.6755
RchiOBHmChr4g0433101.gene	18.1467	15.651	15.4786	9.2858	8.40382	8.91997
RchiOBHmChr4g0433171.gene	0.377515	0.502575	0.50472	2.18357	2.30385	2.5775
RchiOBHmChr4g0433181.gene	2.30198	2.80528	3.18846	0.667123	0.424096	0.548106
RchiOBHmChr4g0433231.gene	12.7386	14.2689	13.2135	31.717	31.0738	42.8087
RchiOBHmChr4g0433251.gene	15.5398	20.4119	23.4816	9.99264	11.7433	10.4288
RchiOBHmChr4g0433281.gene	78.2098	84.8823	84.8301	28.5941	29.7511	47.2149
RchiOBHmChr4g0433451.gene	0.748301	1.2084	0.797986	9.42129	8.56858	8.5518
RchiOBHmChr4g0433461.gene	1.29627	1.83295	1.62029	0.319558	0.049171	0.393539
RchiOBHmChr4g0433521.gene	1.78014	1.98701	1.37256	10.3356	7.09706	5.67906
RchiOBHmChr4g0433881.gene	48.47	53.7891	49.8075	23.8872	29.8777	28.5564
RchiOBHmChr4g0433921.gene	3.49922	3.50912	2.73841	1.54618	1.59935	1.0477
RchiOBHmChr4g0434031.gene	0.345555	0.287518	0.234677	0.859102	1.21401	1.59844
RchiOBHmChr4g0434141.gene	10.1302	5.64348	6.93315	30.5197	19.1929	20.5066
RchiOBHmChr4g0434181.gene	96.8536	85.109	70.903	13.3328	9.81392	4.20529
RchiOBHmChr4g0434191.gene	27.2989	26.889	30.9641	11.0153	9.98773	9.03233
RchiOBHmChr4g0434201.gene	1.38074	1.00345	1.04255	0.483496	0.392481	0.236238
RchiOBHmChr4g0434311.gene	1.98382	3.27944	2.48099	17.3419	20.2387	14.6654
RchiOBHmChr4g0434401.gene	3.24302	2.85693	2.53311	20.0007	13.259	16.4621
RchiOBHmChr4g0434441.gene	8.55926	5.07776	5.45073	46.9527	41.3725	34.0253
RchiOBHmChr4g0434531.gene	5.83636	5.43859	4.1877	16.6202	18.9447	15.1244
RchiOBHmChr4g0434641.gene	32.0226	35.136	33.7364	20.248	17.6925	17.687
RchiOBHmChr4g0434721.gene	0.471351	0.500122	0.382275	3.45024	3.2425	3.01021
RchiOBHmChr4g0434751.gene	0.426115	0.627906	0.319341	3.24103	3.81908	1.75636
RchiOBHmChr4g0434821.gene	3.91164	3.87138	2.07908	17.4942	14.5432	19.6716
RchiOBHmChr4g0434901.gene	1.02222	1.27297	0.603764	8.34687	6.93207	4.99167
RchiOBHmChr4g0435021.gene	2.4407	2.34537	1.64306	9.65413	8.61893	10.7171
RchiOBHmChr4g0435111.gene	15.578	12.6651	14.5286	45.2417	35.5006	40.6447
RchiOBHmChr4g0435151.gene	1.27561	0.677125	1.08019	5.98125	6.09816	5.57742
RchiOBHmChr4g0435161.gene	21.6453	21.4632	22.6802	52.6492	60.6367	56.785
RchiOBHmChr4g0435191.gene	13.042	8.84782	7.9712	28.4481	35.6331	25.3176
RchiOBHmChr4g0435261.gene	12.5167	12.6997	12.8366	35.8572	30.5351	30.0891
RchiOBHmChr4g0435281.gene	4.84479	5.8634	7.67846	36.9443	34.9007	31.5343
RchiOBHmChr4g0435431.gene	0.667616	0.350663	0.080396	1.81093	2.163	2.87594
RchiOBHmChr4g0435491.gene	2.92366	1.30171	0.629793	9.75223	8.83339	4.45955
RchiOBHmChr4g0435501.gene	1.07809	0.722023	0.87729	3.14745	3.95999	2.56394
RchiOBHmChr4g0435631.gene	1.19478	1.18863	1.04984	3.35513	3.57055	2.74139
RchiOBHmChr4g0435741.gene	12.3918	14.5587	15.2574	1.09322	1.45519	0.856362
RchiOBHmChr4g0435761.gene	2.29537	2.11463	1.82801	8.70709	9.29351	9.15019
RchiOBHmChr4g0435821.gene	10.4466	8.34219	9.89535	3.18416	3.692	2.51665
RchiOBHmChr4g0435831.gene	74.9406	71.9629	71.9335	41.0953	45.0266	34.8007
RchiOBHmChr4g0435911.gene	0.85994	0.541823	0.439793	5.0528	5.18748	2.41347
RchiOBHmChr4g0435971.gene	65.1979	62.9221	61.1969	13.6566	14.9014	17.4859
RchiOBHmChr4g0436011.gene	1.87307	1.88507	1.92112	16.4638	12.87	8.5889
RchiOBHmChr4g0436111.gene	0.564511	0.938325	0.485693	0.130383	0.201852	0.299894
RchiOBHmChr4g0436131.gene	29.6769	35.0387	33.7593	12.8846	8.54033	12.3575
RchiOBHmChr4g0436141.gene	0.126364	0.241601	0.209782	0.606354	0.896685	0.744924
RchiOBHmChr4g0436191.gene	0.912333	0.577969	0.607898	5.31525	6.81642	3.62159
RchiOBHmChr4g0436321.gene	745.796	734.475	718.04	437.157	540.776	325.318
RchiOBHmChr4g0436361.gene	29.9224	32.805	36.7406	14.154	17.1059	15.47
RchiOBHmChr4g0436511.gene	10.2024	9.98387	12.0121	1.47041	1.72418	1.44435
RchiOBHmChr4g0436641.gene	0.874999	0.600405	0.538731	14.3863	13.5597	10.8373
RchiOBHmChr4g0436651.gene	0.251806	0.242026	0.258483	1.38955	0.799915	1.3154
RchiOBHmChr4g0436661.gene	4.74504	4.16747	3.29787	16.1168	17.1262	16.2692
RchiOBHmChr4g0436671.gene	2.14784	1.70603	1.89383	10.0948	13.8096	13.4966
RchiOBHmChr4g0436751.gene	142.124	182.668	200.527	67.5844	57.3401	85.2159
RchiOBHmChr4g0436761.gene	117.617	137.48	149.82	43.2229	58.403	64.7229
RchiOBHmChr4g0436771.gene	12.3732	9.13907	11.7481	5.97325	5.14168	4.70827
RchiOBHmChr4g0436791.gene	58.8222	85.0596	81.8076	25.8836	28.6424	31.3831
RchiOBHmChr4g0436911.gene	15.6325	19.166	17.826	6.09764	6.58999	11.254
RchiOBHmChr4g0436931.gene	3.70606	4.94361	4.92331	2.08631	1.15436	1.64027
RchiOBHmChr4g0437011.gene	32.4591	29.0369	31.5647	14.4175	12.4625	11.2882
RchiOBHmChr4g0437071.gene	22.8778	21.298	21.6436	6.51917	4.68202	4.82705
RchiOBHmChr4g0437141.gene	1.29367	1.50101	0.888168	2.73633	4.63587	5.0118
RchiOBHmChr4g0437161.gene	3.39656	3.30926	2.58655	26.4268	30.6866	24.5329
RchiOBHmChr4g0437271.gene	0	0	0.05443	4.01259	1.91362	2.94221
RchiOBHmChr4g0437341.gene	35.73	34.7348	33.3855	19.905	18.2539	23.6007
RchiOBHmChr4g0437501.gene	2.8679	2.7968	1.59695	6.49683	7.36778	3.81963
RchiOBHmChr4g0437751.gene	56.177	65.6606	75.8983	11.5782	12.4848	15.7048
RchiOBHmChr4g0437811.gene	2.96706	3.1865	3.0441	1.31637	1.254	1.38605
RchiOBHmChr4g0437821.gene	428.917	463.714	500.453	106.297	110.45	83.6605
RchiOBHmChr4g0437861.gene	218.811	253.034	257.097	24.9649	33.5751	36.4588
RchiOBHmChr4g0437871.gene	33.0765	32.2765	28.8484	15.6541	13.6651	14.3118
RchiOBHmChr4g0437891.gene	9.92173	1.51702	1.76675	0	0	0
RchiOBHmChr4g0437971.gene	2.08485	1.48924	1.61998	6.2282	5.44238	5.95835
RchiOBHmChr4g0437981.gene	19.6262	21.1953	18.4805	12.273	11.5973	11.1556
RchiOBHmChr4g0438101.gene	1.00911	0.680854	1.03026	5.48587	3.15956	3.62221
RchiOBHmChr4g0438251.gene	2.79418	2.87326	4.19937	10.2119	9.25521	9.10955
RchiOBHmChr4g0438291.gene	2.9962	2.63404	2.94975	7.45218	8.1935	7.51351
RchiOBHmChr4g0438321.gene	0.246384	0.181817	0.483264	5.3655	5.3563	5.90121
RchiOBHmChr4g0438411.gene	126.457	134.572	123.998	41.2507	44.5154	51.2543
RchiOBHmChr4g0438671.gene	3.71111	4.07872	4.27173	19.6648	16.5555	14.6936
RchiOBHmChr4g0438751.gene	1.13719	0.886456	1.39235	0.403149	0.40266	0.072686
RchiOBHmChr4g0438851.gene	3.44514	3.48833	2.19114	27.4593	23.0685	19.8098
RchiOBHmChr4g0439091.gene	11.7432	10.2429	9.91735	37.6466	30.4183	34.4742
RchiOBHmChr4g0439121.gene	0.577484	0.462177	0.341121	1.6887	1.64928	1.20763
RchiOBHmChr4g0439211.gene	1.81129	1.32724	1.28846	13.3727	10.5892	10.0804
RchiOBHmChr4g0439431.gene	0.14806	0.120322	0.119473	1.01035	1.00602	0.776592
RchiOBHmChr4g0439481.gene	1.18781	0.496527	0.585482	5.50549	5.70376	4.05306
RchiOBHmChr4g0439571.gene	10.8863	11.3734	8.82833	2.32576	2.41416	1.69759
RchiOBHmChr4g0439611.gene	5.05985	5.26674	7.26393	1.20093	3.1976	4.31711
RchiOBHmChr4g0439661.gene	3.04173	2.10651	2.23259	6.55056	7.62693	9.04799
RchiOBHmChr4g0439861.gene	0.441416	0.715331	0.425442	3.85499	2.78688	3.85239
RchiOBHmChr4g0440111.gene	58.4547	61.252	112.276	14.1201	14.7093	28.0659
RchiOBHmChr4g0440141.gene	108.183	90.4045	101.401	61.9426	54.4744	45.0671
RchiOBHmChr4g0440151.gene	2.44516	1.58736	2.41262	8.26798	6.7712	7.6106
RchiOBHmChr4g0440161.gene	3.21093	3.10588	3.57148	12.4966	12.7718	10.4011
RchiOBHmChr4g0440361.gene	18.3147	19.6811	20.5813	13.1568	10.2267	11.1737
RchiOBHmChr4g0440521.gene	1.38419	0.599248	0.538457	4.5761	4.80252	5.79647
RchiOBHmChr4g0440561.gene	66.4756	73.6678	85.8939	45.4393	35.2598	30.4205
RchiOBHmChr4g0440591.gene	72.0264	70.8137	78.4903	42.0746	45.3919	31.1127
RchiOBHmChr4g0440661.gene	0.041186	0.026226	0.02696	1.22768	1.15127	1.55578
RchiOBHmChr4g0440751.gene	4.8334	3.60341	2.96132	12.9245	13.3094	16.204
RchiOBHmChr4g0440851.gene	35.6493	34.4119	40.2388	95.6615	97.4887	127.011
RchiOBHmChr4g0440881.gene	6.93643	8.82834	7.78728	20.5337	20.0054	20.1028
RchiOBHmChr4g0440971.gene	0.526473	0.547612	0.340061	1.36982	1.67766	1.43327
RchiOBHmChr4g0441001.gene	1.71659	0.390733	0.268045	4.77115	6.17951	7.0572
RchiOBHmChr4g0441041.gene	0.020921	0.006211	0.020637	6.02679	4.22499	5.20444
RchiOBHmChr4g0441081.gene	103.558	105.911	112.512	55.203	55.7081	72.3675
RchiOBHmChr4g0441101.gene	1.38866	1.25118	1.03127	8.39245	7.5074	8.38541
RchiOBHmChr4g0441111.gene	103.319	120.895	129.411	60.8763	50.5695	63.7977
RchiOBHmChr4g0441241.gene	144.314	128.722	115.339	77.6708	58.8736	79.1395
RchiOBHmChr4g0441251.gene	148.076	160.619	145.781	103.674	92.7344	46.7633
RchiOBHmChr4g0441291.gene	86.8626	69.6283	91.6443	36.991	41.2452	40.5996
RchiOBHmChr4g0441321.gene	0.628967	0.456225	0.153872	2.05427	1.26751	1.56308
RchiOBHmChr4g0441351.gene	0.135567	0.253293	0.268118	0.744119	1.14172	1.55262
RchiOBHmChr4g0441381.gene	0.423836	0.549098	0.460454	1.14778	2.41693	1.71474
RchiOBHmChr4g0441501.gene	17.0425	16.1731	18.4142	9.30502	7.01296	9.18814
RchiOBHmChr4g0441641.gene	17.5849	14.1948	14.7107	1.33383	1.02178	0.931238
RchiOBHmChr4g0441681.gene	0.063161	0.060939	0	26.0776	19.7668	9.33741
RchiOBHmChr4g0441901.gene	1.80894	1.82972	1.79133	0.62716	0.497693	0.679413
RchiOBHmChr4g0441931.gene	0.273875	0.223861	0.151586	1.95977	1.2496	3.04234
RchiOBHmChr4g0441961.gene	18.5121	15.4337	11.5754	45.4264	53.3732	42.6308
RchiOBHmChr4g0441991.gene	0.186844	0.288244	0.050424	1.36204	0.928798	0.8454
RchiOBHmChr4g0442121.gene	8.61183	3.43786	3.07202	16.1835	26.3193	28.3064
RchiOBHmChr4g0442401.gene	0.997895	1.44782	1.11667	6.01574	6.64766	6.91678
RchiOBHmChr4g0442581.gene	2.76787	3.75123	3.50159	1.35277	2.09652	0.78461
RchiOBHmChr4g0442651.gene	1.18236	0.586521	0.442679	3.37118	2.03328	1.90134
RchiOBHmChr4g0442761.gene	3.64832	2.69838	3.07753	10.6788	14.0044	18.1639
RchiOBHmChr4g0442791.gene	0.061017	0	0.1666	3.70934	1.6297	1.97247
RchiOBHmChr4g0442801.gene	6.28803	5.6046	6.36248	2.7515	4.65045	2.10008
RchiOBHmChr4g0442811.gene	36.1576	44.2049	49.6138	23.5111	18.9427	24.0885
RchiOBHmChr4g0443241.gene	0.371968	0.272571	0.598395	1.66969	1.53094	1.58306
RchiOBHmChr4g0443261.gene	20.5797	19.8641	21.899	11.4901	13.5779	11.7611
RchiOBHmChr4g0443311.gene	162.021	158.832	168.327	75.2849	77.99	66.9452
RchiOBHmChr4g0443341.gene	100.433	97.8777	105.025	49.9296	60.5208	57.3817
RchiOBHmChr4g0443411.gene	3.84438	0.866525	1.01804	34.5879	30.7448	28.1334
RchiOBHmChr4g0443421.gene	0.76808	0.074468	0.287572	4.21543	3.40527	3.10117
RchiOBHmChr4g0443431.gene	12.9205	5.36073	6.8196	20.8662	18.8947	26.3494
RchiOBHmChr4g0443451.gene	56.092	48.0013	43.4904	21.2968	14.1179	21.8551
RchiOBHmChr4g0443461.gene	13.4203	15.4351	13.6287	7.43865	3.20078	5.10517
RchiOBHmChr4g0443471.gene	14.8258	15.8229	19.5067	3.54287	3.92617	3.51989
RchiOBHmChr4g0443491.gene	66.8218	60.1522	69.5784	15.7012	35.125	32.7031
RchiOBHmChr4g0443571.gene	0.405778	0.127978	0	3.66335	2.81149	1.42634
RchiOBHmChr4g0443831.gene	1.34919	1.66896	2.05183	8.78222	9.35089	8.4894
RchiOBHmChr4g0443851.gene	1.33318	1.23913	1.51184	4.60872	3.72369	4.87165
RchiOBHmChr4g0443881.gene	1.2038	1.10627	0.94435	22.9088	19.3571	15.3966
RchiOBHmChr4g0443991.gene	48.806	22.794	15.1869	75.247	81.3493	92.5475
RchiOBHmChr4g0444001.gene	1.90004	1.21695	1.15327	29.2693	30.2444	30.162
RchiOBHmChr4g0444071.gene	0.868828	1.25811	1.33998	3.97117	4.40008	5.02514
RchiOBHmChr4g0444101.gene	2.10705	0.927767	1.25672	4.7371	5.24729	6.9514
RchiOBHmChr4g0444151.gene	3.32686	3.20105	3.53855	22.6821	19.3944	13.5872
RchiOBHmChr4g0444191.gene	44.3569	42.3386	43.634	4.49083	5.14715	3.74908
RchiOBHmChr4g0444321.gene	79.5319	81.5804	116.405	17.1179	25.5499	28.555
RchiOBHmChr4g0444351.gene	2.70539	1.72145	2.78345	6.86442	6.23381	6.14055
RchiOBHmChr4g0444361.gene	5.62023	5.2392	4.42142	38.5687	33.9323	23.0775
RchiOBHmChr4g0444531.gene	1.47037	1.06343	1.1364	8.13401	7.41988	7.03327
RchiOBHmChr4g0444581.gene	4.14918	5.19598	5.02662	17.8692	16.5344	19.3378
RchiOBHmChr4g0444861.gene	4.53756	3.19154	3.07167	0.772431	0.943475	0.843248
RchiOBHmChr4g0444931.gene	63.7602	65.0383	68.1455	16.0142	21.9689	33.1815
RchiOBHmChr4g0445091.gene	358.745	317.298	334.792	137.812	163.016	121.828
RchiOBHmChr4g0445101.gene	7.04562	5.9207	6.4909	1.23741	1.0686	0.803395
RchiOBHmChr4g0445221.gene	51.682	48.7817	46.4615	22.7487	27.9359	24.9104
RchiOBHmChr4g0445271.gene	39.5652	44.7957	48.2634	28.2767	23.7955	26.4773
RchiOBHmChr4g0445311.gene	170.392	123.433	123.516	91.6507	101.003	60.595
RchiOBHmChr4g0445371.gene	4.20426	2.09961	2.53041	1.72602	0.170507	0.616122
RchiOBHmChr4g0445441.gene	2.16573	2.29543	1.96991	1.02447	0.905009	0.825241
RchiOBHmChr4g0445521.gene	21.205	16.3383	17.8476	62.2297	75.3646	53.4838
RchiOBHmChr4g0445551.gene	11.3294	11.8097	8.61356	0.553333	3.08795	2.9018
RchiOBHmChr4g0445581.gene	3.19801	3.07294	2.61394	13.9634	12.0681	13.0094
RchiOBHmChr4g0445761.gene	62.0013	63.3164	102.02	28.9841	32.6153	18.7997
RchiOBHmChr4g0446111.gene	13.9469	12.2409	17.0767	8.59561	11.323	4.96707
[truncated: 1,697 more rows]
