# Supplementary material for: Integrative analysis of transcriptome, proteome, and ubiquitome changes during rose petal abscission
Source: Front Plant Sci. 2022 Oct 19;13:1041141. doi: 10.3389/fpls.2022.1041141 (PMC9627506; doi:10.3389/fpls.2022.1041141)
Supplement: Supplementary file 2 [file DataSheet_2.xlsx]

## Sheet: DEG related to auxin pathway
DEG related to auxin pathway
#ID	S3_FPKM	S5_FPKM	FDR	log2FC	annotation
RchiOBHmChr6g0271581.gene	27.0723	71.6925	0.000643298	1.12455	probable indole-3-pyruvate monooxygenase YUCCA10
RchiOBHmChr5g0041561.gene	0.965854	0.232728	2.18e-05	-2.32421	indole-3-acetate O-methyltransferase 1 IAMT1 EC 2.1.1.278
RchiOBHmChr5g0036891.gene	4.53693	21.5105	9.87e-07	1.93933	PREDICTED: indole-3-acetic acid-amido synthetase GH3.6 [Fragaria vesca subsp. vesca]
RchiOBHmChr6g0254401.gene	42.4504	13.5483	8.67e-17	-1.9341	PREDICTED: probable indole-3-acetic acid-amido synthetase GH3.1 [Fragaria vesca subsp. vesca]
RchiOBHmChr7g0178461.gene	3.76706	1.3078	2.56e-07	-1.80513	auxin efflux carrier [Rosa canina] PIN1
RchiOBHmChr5g0015331.gene	47.2435	25.7209	6.07e-09	-1.16332	protein serine/threonine kinase activity, PINOID
RchiOBHmChr2g0094741.gene	4.39721	121.002	1.94e-75	4.4946	PREDICTED: auxin-binding protein ABP19a [Fragaria vesca subsp. vesca]
RchiOBHmChr2g0094781.gene	5.63977	2.42042	0.000279941	-1.49955	PREDICTED: auxin-binding protein ABP19a-like [Fragaria vesca subsp. vesca]
RchiOBHmChr2g0089801.gene	13.3331	1.94871	7.8e-19	-2.99986	PREDICTED: auxin-responsive protein IAA1-like [Fragaria vesca subsp. vesca]
RchiOBHmChr3g0451081.gene	138.381	43.822	1.22e-16	-1.94137	PREDICTED: auxin-responsive protein IAA4-like [Fragaria vesca subsp. vesca]
RchiOBHmChr2g0137311.gene	9.28339	3.77199	0.00708419	-1.5763	PREDICTED: auxin-induced protein IAA6 [Fragaria vesca subsp. vesca]
RchiOBHmChr7g0233101.gene	59.1899	35.6648	4.71e-07	-1.01916	PREDICTED: auxin-responsive protein IAA8-like isoform X1 [Fragaria vesca subsp. vesca]
RchiOBHmChr6g0286601.gene	7.87678	3.03718	3.77e-07	-1.6525	PREDICTED: auxin-responsive protein IAA11-like isoform X1 [Fragaria vesca subsp. vesca]
RchiOBHmChr4g0389621.gene	196.297	111.469	1.76e-06	-1.10205	PREDICTED: auxin-responsive protein IAA14-like [Fragaria vesca subsp. vesca]
RchiOBHmChr6g0297821.gene	8.84097	4.66666	0.0014468	-1.20869	Auxin-responsive protein IAA29
RchiOBHm_Chr5g0014961					PREDICTED: auxin response factor 6
RchiOBHm_Chr3g0487771					PREDICTED: auxin response factor 8
RchiOBHmChr5g0058761.gene	12.1109	4.54712	5.51e-12	-1.69289	PREDICTED: auxin response factor 18-like [Fragaria vesca subsp. vesca]
RchiOBHm_Chr2g0095551	157.335	57.2212	1.32e-17	-1.74775	PREDICTED: auxin response factor 19-like [Fragaria vesca subsp. vesca]
RchiOBHmChr6g0283381.gene	4.49707	13.5886	0.00031978	1.30607	PREDICTED: auxin-induced protein 12 [Fragaria vesca subsp. vesca]
RchiOBHmChr6g0246051.gene	2.81943	0.774135	0.000100586	-2.12255	PREDICTED: auxin-induced protein 15A [Fragaria vesca subsp. vesca]
RchiOBHmChr6g0268951.gene	3.26135	0.167961	5.57e-09	-4.30793	PREDICTED: auxin-induced protein 15A-like [Fragaria vesca subsp. vesca] IAA15
RchiOBHmChr2g0124401.gene	6.08765	0.491166	1.37e-13	-3.8538	auxin-induced protein 15A-like
RchiOBHmChr5g0056831.gene	3.56593	0.368523	1.79e-05	-3.46184	PREDICTED: auxin-induced protein 15A-like [Fragaria vesca subsp. vesca]
RchiOBHmChr2g0124531.gene	2.41784	0.407928	5.57e-07	-2.77409	PREDICTED: auxin-induced protein 15A-like [Fragaria vesca subsp. vesca]
RchiOBHmChr3g0483671.gene	9.97124	0.775199	1.6e-13	-3.91737	PREDICTED: auxin-induced protein 15A-like [Fragaria vesca subsp. vesca]
RchiOBHmChr7g0210621.gene	3.02363	0.416865	1.16e-08	-3.06278	PREDICTED: auxin-induced protein 15A-like [Fragaria vesca subsp. vesca]
RchiOBHmChr6g0268551.gene	2.79094	13.6599	9.09e-08	1.99613	PREDICTED: auxin-induced protein 15A-like [Fragaria vesca subsp. vesca]
RchiOBHmChr2g0124451.gene	7.77626	0.484031	3.85e-15	-4.24417	PREDICTED: auxin-induced protein 15A-like [Fragaria vesca subsp. vesca]
RchiOBHmChr6g0268901.gene	2.42092	0.250566	3.4e-06	-3.4449	PREDICTED: auxin-induced protein 15A-like [Fragaria vesca subsp. vesca]
RchiOBHmChr6g0289581.gene	48.6708	6.94755	6.38e-25	-3.08916	PREDICTED: auxin-induced protein 22D-like [Fragaria vesca subsp. vesca]
RchiOBHmChr6g0268871.gene	11.4235	0.4717	1.15e-14	-4.81397	PREDICTED: auxin-induced protein X10A-like [Fragaria vesca subsp. vesca]
RchiOBHmChr7g0211501.gene	32.41	3.27612	4.46e-09	-3.56475	PREDICTED: auxin-induced protein ARG7-like [Fragaria vesca subsp. vesca]
RchiOBHmChr7g0211131.gene	3.9916	0.695175	5.19e-05	-2.77254	PREDICTED:auxin-induced protein ARG7-like [Fragaria vesca subsp. vesca]
RchiOBHmChr7g0210661.gene	2.61612	0.788483	0.000100586	-2.01938	PREDICTED: auxin-induced protein ARG7-like [Fragaria vesca subsp. vesca]
RchiOBHmChr7g0210531.gene	3.27042	0.31939	2.09e-08	-3.58593	PREDICTED:auxin-induced protein ARG7-like [Fragaria vesca subsp. vesca]
RchiOBHmChr3g0483711.gene	8.71094	0.435642	1.29e-10	-4.467	PREDICTED: auxin-induced protein ARG7-like [Fragaria vesca subsp. vesca]
RchiOBHmChr7g0210851.gene	15.9583	1.8941	9.74e-10	-3.32891	PREDICTED:auxin-induced protein ARG7-like [Fragaria vesca subsp. vesca]
RchiOBHmChr2g0124561.gene	4.17075	0.911548	3.08e-06	-2.46479	PREDICTED: auxin-induced protein ARG7-like [Fragaria vesca subsp. vesca]
RchiOBHmChr7g0204271.gene	59.9199	33.288	1.01e-08	-1.13238	PREDICTED: homeobox-leucine zipper protein HAT4-like [Fragaria vesca subsp. vesca]
RchiOBHmChr3g0471771.gene	70.7315	1.35429	6.96e-23	-5.93949	Auxin-responsive protein SAUR40
RchiOBHmChr5g0057781.gene	7.27708	1.3679	2e-10	-2.69272	auxin-responsive protein SAUR50 [Prunus persica]
RchiOBHmChr2g0095881.gene	151.204	46.9456	6.64e-23	-1.97432	Auxin responsive protein ,SAUR76
RchiOBHmChr5g0026611.gene	1.97853	6.85616	0.00128365	1.49565	Auxin responsive protein, SAUR78
RchiOBHmChr6g0290221.gene	0.744171	3.67569	1.27e-06	2.01018	PREDICTED: putative GPI-anchored protein PB15E9.01c [Fragaria vesca subsp. vesca]
RchiOBHmChr6g0302011.gene	31.7432	18.6178	0.000626717	-1.05595	PREDICTED: protein WALLS ARE THIN 1 [Fragaria vesca subsp. vesca] WAT1

## Sheet: DEG related to ethylene pathway
DEG related to ethylene pathway
#ID	S3_FPKM	S5_FPKM	FDR	log2FC	annotation
RchiOBHm_Chr4g0427101	1421.97	775.77	3.52e-07	-1.1599	S-adenosylmethionine synthetase superfamily; S-adenosylmethionine synthetase, N-terminal; S-adenosylmethionine synthetase, C-terminal; S-adenosylmethionine synthetase, central domain; SAMS2
RchiOBHmChr4g0436761.gene	134.972	55.4496	3.47e-16	-1.56917	PREDICTED: S-adenosylmethionine synthase 2 [Fragaria vesca subsp. vesca] SAMS2
RchiOBHm_Chr3g0486231					S-adenosylmethionine synthetase superfamily; S-adenosylmethionine synthetase, N-terminal; S-adenosylmethionine synthetase, C-terminal; S-adenosylmethionine synthetase, central domain; SAMS5
RchiOBHmChr5g0001831.gene	108.956	41.7846	1.24e-10	-1.66565	PREDICTED: 1-aminocyclopropane-1-carboxylate oxidase 1 [Fragaria vesca subsp. vesca] ACO1
RchiOBHmChr6g0288741.gene	0.731125	5.57104	8.08e-09	2.54618	PREDICTED: 1-aminocyclopropane-1-carboxylate oxidase homolog 1-like [Fragaria vesca subsp. vesca] ACO1-like
RchiOBHmChr4g0443261.gene	20.7809	12.2764	8.01e-05	-1.04492	PREDICTED: 1-aminocyclopropane-1-carboxylate oxidase homolog 4-like [Fragaria vesca subsp. vesca] ACO4-like
RchiOBHmChr6g0259561.gene	44.8077	19.7472	2.32e-12	-1.46636	PREDICTED: 1-aminocyclopropane-1-carboxylate oxidase 5-like [Fragaria vesca subsp. vesca] ACO5-like
RchiOBHmChr7g0239961.gene	2.77135	8.83988	7.38e-05	1.38467	PREDICTED: 1-aminocyclopropane-1-carboxylate oxidase homolog [Fragaria vesca subsp. vesca] ACO-like
RchiOBHmChr6g0294491.gene	11.0415	46.6883	1.17e-18	1.79858	ethylene receptor [Fragaria x ananassa], ethylene response sensor 1 isoform X2, ERS1
RchiOBHmChr7g0235241.gene	0.327529	2.41938	1.43e-10	2.55884	PREDICTED: serine/threonine-protein kinase CTR1 [Fragaria vesca subsp. vesca] CTR1
RchiOBHmChr6g0288231.gene	0.369018	6.64732	1.14e-12	3.80808	PREDICTED: ethylene-responsive transcription factor 1B [Fragaria vesca subsp. vesca] ERF1B
RchiOBHmChr4g0392501.gene	0.107983	3.92358	3.46e-06	4.68508	PREDICTED: ethylene-responsive transcription factor 1B [Fragaria vesca subsp. vesca] ERF1B
RchiOBHmChr1g0373621.gene	5.25303	15.9735	2.3e-05	1.31466	PREDICTED: ethylene-responsive transcription factor 2-like [Fragaria vesca subsp. vesca] ERF2-like
RchiOBHmChr6g0299771.gene	14.9594	65.3423	0.00403288	1.83152	PREDICTED: ethylene-responsive transcription factor ERF003-like [Fragaria vesca subsp. vesca] ERF003-like
RchiOBHmChr6g0289271.gene	3.89106	13.115	0.000319961	1.46044	PREDICTED: ethylene-responsive transcription factor 9-like [Fragaria vesca subsp. vesca] ERF9-like
RchiOBHmChr5g0008971.gene	4.05458	26.386	2e-17	2.41039	PREDICTED: ethylene-responsive transcription factor 12 [Fragaria vesca subsp. vesca] ERF12
RchiOBHmChr6g0295481.gene	1.73213	12.7655	0.00106197	2.58361	PREDICTED: ethylene-responsive transcription factor ERF014 [Fragaria vesca subsp. vesca] ERF014
RchiOBHmChr7g0231631.gene	0	9.96196	0.00198014	Inf	PREDICTED: ethylene-responsive transcription factor ERF021 [Fragaria vesca subsp. vesca] ERF021
RchiOBHmChr1g0360021.gene	18.8918	10.4456	0.000209551	-1.13687	PREDICTED: ethylene-responsive transcription factor ERF023 [Fragaria vesca subsp. vesca] ERF023
RchiOBHmChr1g0376651.gene	0.422344	3.01005	2.66e-07	2.5304	PREDICTED: ethylene-responsive transcription factor ERF027 [Fragaria vesca subsp. vesca] ERF027
RchiOBHmChr1g0346421.gene	1.61885	9.53972	1.62e-09	2.25873	PREDICTED: ethylene-responsive transcription factor ERF034-like [Fragaria vesca subsp. vesca] ERF034-like
RchiOBHmChr4g0415231.gene	2.62148	1.14389	0.00170038	-1.47002	PREDICTED: ethylene-responsive transcription factor ERF062 [Fragaria vesca subsp. vesca] ERF062
RchiOBHmChr7g0188681.gene	4.45435	16.5836	1.46e-06	1.60506	PREDICTED: ethylene-responsive transcription factor ERF113-like [Fragaria vesca subsp. vesca] ERF113-like
RchiOBHmChr4g0435261.gene	12.6843	32.1605	1.48e-06	1.05297	PREDICTED: ethylene-responsive transcription factor ERF118 [Fragaria vesca subsp. vesca] ERF118
RchiOBHmChr2g0111031.gene	0.141501	1.81697	0.000150556	3.34391	PREDICTED: AP2-like ethylene-responsive transcription factor AIL6 [Fragaria vesca subsp. vesca] AIL6
RchiOBHmChr2g0132251.gene	0.137901	0.970617	6.11e-05	2.38029	PREDICTED: AP2-like ethylene-responsive transcription factor At1g16060 [Fragaria vesca subsp. vesca] ADAP
RchiOBHmChr3g0482661.gene	5.9363	15.8945	1.21e-05	1.123	PREDICTED: AP2-like ethylene-responsive transcription factor At2g41710 [Fragaria vesca subsp. vesca], SMOS1
RchiOBHmChr1g0364341.gene	7.9078	4.5573	0.000468061	-1.07588	PREDICTED: ethylene-responsive transcription factor RAP2-7-like isoform X1 [Fragaria vesca subsp. vesca] RAP2-7-like
RchiOBHmChr2g0135921.gene	14.801	0.809505	2.69e-14	-4.44746	PREDICTED: LOW QUALITY PROTEIN: ethylene-responsive transcription factor WIN1-like [Fragaria vesca subsp. vesca] WIN1-like
RchiOBHmChr3g0468481.gene	0.726357	3.64049	4.56e-06	1.95131	PREDICTED: AP2-like ethylene-responsive transcription factor TOE3 [Fragaria vesca subsp. vesca] TOE3
RchiOBHmChr2g0139661.gene	0.901227	10.7727	1.18e-10	3.28248	PREDICTED: ethylene-responsive transcription factor TINY [Fragaria vesca subsp. vesca]
RchiOBHmChr6g0310091.gene	0.995806	35.3889	3.44e-19	4.8304	PREDICTED: AP2-like ethylene-responsive transcription factor ANT [Fragaria vesca subsp. vesca]
RchiOBHmChr6g0310861.gene	2.9229	9.75226	5.09e-05	1.43376	PREDICTED: protein REVERSION-TO-ETHYLENE SENSITIVITY1 [Fragaria vesca subsp. vesca] RES
