# Supplementary material for: Integrative analysis of transcriptome, proteome, and ubiquitome changes during rose petal abscission
Source: Front Plant Sci. 2022 Oct 19;13:1041141. doi: 10.3389/fpls.2022.1041141 (PMC9627506; doi:10.3389/fpls.2022.1041141)
Supplement: Supplementary file 9 [file DataSheet_9.xlsx]

## Sheet: Sheet1
Supplementary Table 9. List of primers used in this study.
Primer name	Sequence
CYP98A3-qRT-F	ACAAACGTGTGGAAGCTGAA
CYP98A3-qRT-R	ATTTGCATTCCCCAAATTTGAATC
CYP716A1-qRT-F	TGCCTACCCCAGAAAAGGAC
CYP716A1-qRT-R	GATGCCTAAGCACAACAGATATACC
CYP72A15-qRT-F	CCGCACCTATGATTCGACCA
CYP72A15-qRT-R	TGCAGCATGCTTACAACTTACA
COMT1-qRT-F	GAGTACGAGGCATTGGCACT
COMT1-qRT-R	ACTGCACCGATGCAAGGATT
PRXR52-1-qRT-F	AGAACTGCAGGAAGCCCAATTA
PRX52-1-qRT-R	TCCAGGGCCATATATAGAGTACC
PRXR1-qRT-F	CCGAGAACAACCCTCTCACC
PRXR1-qRT-R	CACGCACTCACACGAGCTA
PRX52-2-qRT-F	TGATTCTCCATCTCCATGTCCA
PRX52-2-qRT-R	AAACCACTCACTGGGTCTCG
PRX52-3-qRT-F	GGGCACCAACGGTCAGATTA
PRX52-3-qRT-R	TAGACGCTCGGAAGCAATCG
BGLU17-qRT-F	GGAGGTGATGGACAGCCAAT
BGLU17-qRT-R	TCAAGATGTTCCTCCTGCACT
BGLU14-qRT-F	TTGCTTTCCTCTTGCGTGGT
BGLU14-qRT-R	TGCAGGTTACCAAAAACTGAGC
RhUBI2-qRT-F	GCCCTGGTGCGTTCCCAACTG
RhUBI2-qRT-R	CCTGCGTGTCTGTCCGCATTG
