# Supplementary material for: Integrative analysis of transcriptome, proteome, and ubiquitome changes during rose petal abscission
Source: Front Plant Sci. 2022 Oct 19;13:1041141. doi: 10.3389/fpls.2022.1041141 (PMC9627506; doi:10.3389/fpls.2022.1041141)
Supplement: Supplementary Table 4 — Changes in ubiquitinated proteins and ubiquitination sites. [file DataSheet_4.xlsx]

## Sheet: Diff distribution
Compared sample name	Type	Up-regulated	Down-regulated
stage5/stage3	Sites	139	55
	Proteins	100	48

## Sheet: stage5vsstage3
Protein accession	Position	stage5/stage3 Ratio	Regulated Type	stage5/stage3 P value	Amino acid	Protein description	Gene name	Localization probability	PEP	Score	Modified sequence	Charge	Mass error [ppm]	MS/MS Count	S3_1	S3_2	S3_3	S5_1	S5_2	S5_3	Subcellular localization	Biological Process	Cellular Component	Molecular Function	KEGG KO No.	KEGG Gene	KEGG pathway	IPR ID	Domain description
RchiOBHm_Chr1g0324071	300	0.581	Down	0.032722	K	"""Putative proton-dependent oligopeptide transporter family, major facilitator superfamily"""	---	1	0.00011011	125.17	AMIIDEHDASSK(1)MR	3	0.3326	15	1.083	1.24	1.567	0.776	0.731		plasma membrane	GO:0006810 transport; GO:0006857 oligopeptide transport; GO:0071702 organic substance transport; GO:0051179 localization; GO:0042886 amide transport; GO:0015833 peptide transport; GO:0071705 nitrogen compound transport; GO:0051234 establishment of localization;	GO:0016020 membrane;	GO:0005215 transporter activity;	K14638			IPR020846;	Major facilitator superfamily domain;
RchiOBHm_Chr1g0334541	89	1.863	Up	0.031158	K	Putative ribosomal protein L6	---	1	1.73e-05	98.167	TALSHVENLITGVTK(1)GYR	3	1.1581	6	0.563	1.066	0.619	1.404	1.292	1.492	cytoplasm	GO:0006518 peptide metabolic process; GO:0043043 peptide biosynthetic process; GO:0044267 cellular protein metabolic process; GO:0006807 nitrogen compound metabolic process; GO:0009058 biosynthetic process; GO:0043603 cellular amide metabolic process; GO:0044238 primary metabolic process; GO:1901566 organonitrogen compound biosynthetic process; GO:1901576 organic substance biosynthetic process; G…	GO:0005840 ribosome; GO:0043226 organelle; GO:0043229 intracellular organelle; GO:0043232 intracellular non-membrane-bounded organelle; GO:0044464 cell part; GO:0005622 intracellular; GO:0005737 cytoplasm; GO:0032991 macromolecular complex; GO:0044424 intracellular part; GO:1990904 ribonucleoprotein complex; GO:0005623 cell; GO:0030529 intracellular ribonucleoprotein complex; GO:0044444 cytoplasm…	GO:0097159 organic cyclic compound binding; GO:1901363 heterocyclic compound binding; GO:0003723 RNA binding; GO:0005488 binding; GO:0003676 nucleic acid binding; GO:0005198 structural molecule activity; GO:0003735 structural constituent of ribosome; GO:0019843 rRNA binding;	K02940	RP-L9e; large subunit ribosomal protein L9e	mdm03010 Ribosome - Malus domestica (apple);	IPR020040;	Ribosomal protein L6, alpha-beta domain;
RchiOBHm_Chr1g0339521	27	0.654	Down	0.0040024	K	Putative trafficking protein particle complex subunit 2	---	1	4.01e-45	241.56	NDIPIYEAEVGSAAK(1)R	2	1.0048	12	1.123	1.181	1.351	0.846	0.728	0.815	cytoplasm	GO:0006810 transport; GO:0046907 intracellular transport; GO:0051649 establishment of localization in cell; GO:0016192 vesicle-mediated transport; GO:0048193 Golgi vesicle transport; GO:0051179 localization; GO:0006888 ER to Golgi vesicle-mediated transport; GO:0051641 cellular localization; GO:0051234 establishment of localization;	GO:0005623 cell; GO:0005622 intracellular; GO:0044464 cell part;		K20301			IPR011012;	Longin-like domain;
RchiOBHm_Chr1g0339521	127	0.506	Down	0.0135384	K	Putative trafficking protein particle complex subunit 2	---	1	3.22e-33	213.45	ITSSHFDTK(1)VR	2	0.37563	9	1.305	1.227	1.513	0.548	0.903	0.594	cytoplasm	GO:0006810 transport; GO:0046907 intracellular transport; GO:0051649 establishment of localization in cell; GO:0016192 vesicle-mediated transport; GO:0048193 Golgi vesicle transport; GO:0051179 localization; GO:0006888 ER to Golgi vesicle-mediated transport; GO:0051641 cellular localization; GO:0051234 establishment of localization;	GO:0005623 cell; GO:0005622 intracellular; GO:0044464 cell part;		K20301			IPR011012;	Longin-like domain;
RchiOBHm_Chr1g0340961	326	1.62	Up	0.000135275	K	Putative UDP-glucose 6-dehydrogenase	---	0.938759	4.38e-44	174.8	VVASMFNTVSK(0.061)K(0.939)	2	-2.3448	11	0.76	0.778	0.786	1.179	1.278	1.309	extracellular	GO:0044699 single-organism process; GO:0008152 metabolic process; GO:0055114 oxidation-reduction process; GO:0044710 single-organism metabolic process;		GO:0097159 organic cyclic compound binding; GO:1901363 heterocyclic compound binding; GO:0016614 oxidoreductase activity, acting on CH-OH group of donors; GO:0016616 oxidoreductase activity, acting on the CH-OH group of donors, NAD or NADP as acceptor; GO:1901265 nucleoside phosphate binding; GO:0003979 UDP-glucose 6-dehydrogenase activity; GO:0051287 NAD binding; GO:0003824 catalytic activity; G…	K00012	UGDH; UDPglucose 6-dehydrogenase [EC:1.1.1.22]	mdm00053 Ascorbate and aldarate metabolism - Malus domestica (apple); mdm00520 Amino sugar and nucleotide sugar metabolism - Malus domestica (apple); mdm00040 Pentose and glucuronate interconversions - Malus domestica (apple); mdm01100 Metabolic pathways - Malus domestica (apple);	IPR001732; IPR008927; IPR014027; IPR016040; IPR014026;	UDP-glucose/GDP-mannose dehydrogenase, N-terminal; 6-phosphogluconate dehydrogenase C-terminal domain-like; UDP-glucose/GDP-mannose dehydrogenase, C-terminal; NAD(P)-binding domain; UDP-glucose/GDP-mannose dehydrogenase, dimerisation;
RchiOBHm_Chr1g0341631	49	1.715	Up	0.0075013	K	Putative tubulin binding cofactor A	---	1	1.47e-06	129.04	GADPYDLK(1)QQENVLAESR	3	0.48246	5	0.91	0.838		1.533		1.465	chloroplast	GO:0044085 cellular component biogenesis; GO:0016043 cellular component organization; GO:0034622 cellular macromolecular complex assembly; GO:0071822 protein complex subunit organization; GO:0007021 tubulin complex assembly; GO:0043933 macromolecular complex subunit organization; GO:0006457 protein folding; GO:0022607 cellular component assembly; GO:0065003 macromolecular complex assembly; GO:007…		GO:0015631 tubulin binding; GO:0048487 beta-tubulin binding; GO:0005515 protein binding; GO:0008092 cytoskeletal protein binding; GO:0005488 binding;	K17292
RchiOBHm_Chr1g0343301	286	0.578	Down	0.0142028	K	Putative aldehyde oxygenase (deformylating)	---	1	2.69e-11	162.8	STDSLYESSLK(1)R	2	0.87488	6	1.46	1.249	1.31	0.792	0.602	0.93	cytoplasm	GO:0044711 single-organism biosynthetic process; GO:0016053 organic acid biosynthetic process; GO:0055114 oxidation-reduction process; GO:0044281 small molecule metabolic process; GO:0044763 single-organism cellular process; GO:0044699 single-organism process; GO:0009058 biosynthetic process; GO:0044255 cellular lipid metabolic process; GO:0006631 fatty acid metabolic process; GO:0044238 primary …		GO:0005506 iron ion binding; GO:0046914 transition metal ion binding; GO:0003824 catalytic activity; GO:0005488 binding; GO:0043167 ion binding; GO:0046872 metal ion binding; GO:0043169 cation binding; GO:0016491 oxidoreductase activity;	K15404	CER1; aldehyde decarbonylase [EC:4.1.99.5]	mdm00920 Sulfur metabolism - Malus domestica (apple); mdm01110 Biosynthesis of secondary metabolites - Malus domestica (apple);	IPR006694; IPR021940;	Fatty acid hydroxylase; Uncharacterised domain Wax2, C-terminal;
RchiOBHm_Chr1g0343301	496	0.637	Down	0.033598	K	Putative aldehyde oxygenase (deformylating)	---	1	6.02e-07	174.23	SFNATESK(1)LVLAK	2	1.4387	7	1.419	1.361	1.073	0.774	0.679	1.002	cytoplasm	GO:0044711 single-organism biosynthetic process; GO:0016053 organic acid biosynthetic process; GO:0055114 oxidation-reduction process; GO:0044281 small molecule metabolic process; GO:0044763 single-organism cellular process; GO:0044699 single-organism process; GO:0009058 biosynthetic process; GO:0044255 cellular lipid metabolic process; GO:0006631 fatty acid metabolic process; GO:0044238 primary …		GO:0005506 iron ion binding; GO:0046914 transition metal ion binding; GO:0003824 catalytic activity; GO:0005488 binding; GO:0043167 ion binding; GO:0046872 metal ion binding; GO:0043169 cation binding; GO:0016491 oxidoreductase activity;	K15404	CER1; aldehyde decarbonylase [EC:4.1.99.5]	mdm00920 Sulfur metabolism - Malus domestica (apple); mdm01110 Biosynthesis of secondary metabolites - Malus domestica (apple);	IPR006694; IPR021940;	Fatty acid hydroxylase; Uncharacterised domain Wax2, C-terminal;
RchiOBHm_Chr1g0343301	82	0.581	Down	0.031599	K	Putative aldehyde oxygenase (deformylating)	---	1	2.68e-07	163.93	IVDK(1)GLEFEQVDRER	3	-0.38722	20	1.587	1.318	1.105	0.858	0.586	0.887	cytoplasm	GO:0044711 single-organism biosynthetic process; GO:0016053 organic acid biosynthetic process; GO:0055114 oxidation-reduction process; GO:0044281 small molecule metabolic process; GO:0044763 single-organism cellular process; GO:0044699 single-organism process; GO:0009058 biosynthetic process; GO:0044255 cellular lipid metabolic process; GO:0006631 fatty acid metabolic process; GO:0044238 primary …		GO:0005506 iron ion binding; GO:0046914 transition metal ion binding; GO:0003824 catalytic activity; GO:0005488 binding; GO:0043167 ion binding; GO:0046872 metal ion binding; GO:0043169 cation binding; GO:0016491 oxidoreductase activity;	K15404	CER1; aldehyde decarbonylase [EC:4.1.99.5]	mdm00920 Sulfur metabolism - Malus domestica (apple); mdm01110 Biosynthesis of secondary metabolites - Malus domestica (apple);	IPR006694; IPR021940;	Fatty acid hydroxylase; Uncharacterised domain Wax2, C-terminal;
RchiOBHm_Chr1g0343491	112	0.621	Down	0.026796	K	Putative acyl-CoA desaturase	---	1	1.93e-33	204.86	YHHQFTEK(1)LR	2	-0.65423	20	1.183	0.953	1.314	0.579	0.817	0.746	chloroplast	GO:0044699 single-organism process; GO:0008152 metabolic process; GO:0055114 oxidation-reduction process; GO:0044710 single-organism metabolic process;		GO:0016705 oxidoreductase activity, acting on paired donors, with incorporation or reduction of molecular oxygen; GO:0003824 catalytic activity; GO:0016717 oxidoreductase activity, acting on paired donors, with oxidation of a pair of donors resulting in the reduction of molecular oxygen to two molecules of water; GO:0016491 oxidoreductase activity;
RchiOBHm_Chr1g0343691	73	0.391	Down	0.00024057	K	Putative aldehyde oxygenase (deformylating)	---	1	2.24e-32	175.54	YQTAK(1)GK(1)GTIVDK(1)GLEFEQVDRER	4	2.5145	15	1.356	1.263	1.19	0.539	0.435	0.517	cytoplasm	GO:0044711 single-organism biosynthetic process; GO:0016053 organic acid biosynthetic process; GO:0055114 oxidation-reduction process; GO:0044281 small molecule metabolic process; GO:0044763 single-organism cellular process; GO:0044699 single-organism process; GO:0009058 biosynthetic process; GO:0044255 cellular lipid metabolic process; GO:0006631 fatty acid metabolic process; GO:0044238 primary …		GO:0005506 iron ion binding; GO:0046914 transition metal ion binding; GO:0003824 catalytic activity; GO:0005488 binding; GO:0043167 ion binding; GO:0046872 metal ion binding; GO:0043169 cation binding; GO:0016491 oxidoreductase activity;	K15404	CER1; aldehyde decarbonylase [EC:4.1.99.5]	mdm00920 Sulfur metabolism - Malus domestica (apple); mdm01110 Biosynthesis of secondary metabolites - Malus domestica (apple);	IPR006694; IPR021940;	Fatty acid hydroxylase; Uncharacterised domain Wax2, C-terminal;
RchiOBHm_Chr1g0348091	238	1.813	Up	0.0183215	K	Putative ELMO domain-containing protein	---	1	0.000257874	141.44	ASYMDFNTVMK(1)STR	2	4.6728	14	0.841	0.612		1.276	1.252	1.423	nucleus				K23538			IPR006816;	ELMO domain;
RchiOBHm_Chr1g0349111	160	0.663	Down	0.0099172	K	Putative vesicle-associated membrane-protein-associated protein	---	1	4.92e-07	108.5	ASVDNGNFNDSEFK(1)AAPR	2	2.5815	15	1.323	1.153	1.107	0.716	0.754	0.906	cytoplasm		GO:0016020 membrane; GO:0043229 intracellular organelle; GO:0005783 endoplasmic reticulum; GO:0042175 nuclear outer membrane-endoplasmic reticulum membrane network; GO:0005737 cytoplasm; GO:0044446 intracellular organelle part; GO:0012505 endomembrane system; GO:0044424 intracellular part; GO:0005623 cell; GO:0044422 organelle part; GO:0043231 intracellular membrane-bounded organelle; GO:0043226 …					IPR008962; IPR000535;	PapD-like; Major sperm protein (MSP) domain;
RchiOBHm_Chr1g0349111	110	0.605	Down	0.046715	K	Putative vesicle-associated membrane-protein-associated protein	---	0.999952	4.54e-07	86.135	DITPEMFNK(1)ESGHNVEECK	3	0.87484	5	1.177	1.008	1.333		0.601	0.818	cytoplasm		GO:0016020 membrane; GO:0043229 intracellular organelle; GO:0005783 endoplasmic reticulum; GO:0042175 nuclear outer membrane-endoplasmic reticulum membrane network; GO:0005737 cytoplasm; GO:0044446 intracellular organelle part; GO:0012505 endomembrane system; GO:0044424 intracellular part; GO:0005623 cell; GO:0044422 organelle part; GO:0043231 intracellular membrane-bounded organelle; GO:0043226 …					IPR008962; IPR000535;	PapD-like; Major sperm protein (MSP) domain;
RchiOBHm_Chr1g0352641	139	0.433	Down	0.027897	K	Putative 26S proteasome regulatory subunit Rpn7/COP9 signalosome complex subunit 1	---	1	0.00485668	111.39	TNLIK(1)ESIR	2	-2.739	6	1.295	1.525	1.42	0.671	0.82	0.345	cytoplasm				K12175
RchiOBHm_Chr1g0354121	470	0.643	Down	0.0054221	K	"""Putative C2 domain, phosphoribosyltransferase"""	---	0.994339	2.88e-07	170.69	VQIGNQVLK(0.994)TK(0.006)	2	-1.6479	5		1.357	1.225	0.77	0.859	0.861	plasma membrane			GO:0005515 protein binding; GO:0005488 binding;				IPR013583; IPR000008;	Phosphoribosyltransferase C-terminal; C2 domain;
RchiOBHm_Chr1g0363361	16	1.917	Up	0.0119391	K	Putative major intrinsic protein	---	1	1.06e-66	246.95	GSFSAK(1)DYHDPPPAPLFDSVELTK	3	4.0097	10	0.62	0.607	0.796	1.615	1.12	1.143	plasma membrane	GO:0006810 transport; GO:0051179 localization; GO:0051234 establishment of localization;	GO:0016020 membrane;	GO:0005215 transporter activity;	K09872			IPR023271;	Aquaporin-like;
RchiOBHm_Chr1g0365111	194	0.64	Down	0.022398	K	Chalcone--flavonone isomerase	---	1	2.04e-10	178.03	LLSESVLESIIGK(1)QGVSPEAR	3	1.4003	6	1.249	1.043	1.309	0.886	0.795	0.623	cytoplasm	GO:0008152 metabolic process; GO:0009058 biosynthetic process; GO:0009813 flavonoid biosynthetic process; GO:0009812 flavonoid metabolic process; GO:1901576 organic substance biosynthetic process; GO:0071704 organic substance metabolic process;		GO:0016872 intramolecular lyase activity; GO:0045430 chalcone isomerase activity; GO:0016853 isomerase activity; GO:0003824 catalytic activity;	K01859	E5.5.1.6; chalcone isomerase [EC:5.5.1.6]	mdm00941 Flavonoid biosynthesis - Malus domestica (apple); mdm01110 Biosynthesis of secondary metabolites - Malus domestica (apple); mdm01100 Metabolic pathways - Malus domestica (apple);	IPR016088; IPR016087;	Chalcone isomerase, 3-layer sandwich; Chalcone isomerase;
RchiOBHm_Chr1g0368671	31	0.641	Down	0.0061376	K	Putative protein-serine/threonine phosphatase	---	1	0.000396739	103.76	PGK(1)QVQLSESEIK	2	1.5649	14	1.092	1.218	1.436	0.779	0.838	0.786	cytoplasm			GO:0016787 hydrolase activity; GO:0003824 catalytic activity;	K06269	PPP1C; serine/threonine-protein phosphatase PP1 catalytic subunit [EC:3.1.3.16]	mdm03015 mRNA surveillance pathway - Malus domestica (apple);	IPR029052; IPR004843; IPR031675; IPR006186;	Metallo-dependent phosphatase-like; Calcineurin-like phosphoesterase domain, ApaH type; Serine-threonine protein phosphatase, N-terminal; Serine/threonine-specific protein phosphatase/bis(5-nucleosyl)-tetraphosphatase;
RchiOBHm_Chr1g0369541	4	2.097	Up	0.032517	K	Putative major intrinsic protein	---	1	1.2e-33	236.34	MQAK(1)EEDVSLGANK(1)FPER	3	3.2449	39	0.508	0.89	0.564	1.693	1.426	0.995	plasma membrane	GO:0006810 transport; GO:0051179 localization; GO:0051234 establishment of localization;	GO:0016020 membrane;	GO:0005215 transporter activity;	K09872			IPR023271;	Aquaporin-like;
RchiOBHm_Chr1g0369541	253	0.428	Down	0.0051043	K	Putative major intrinsic protein	---	1	3.28e-33	203.97	SLGAAIIFNK(1)DR	2	0.93747	6	1.635	1.451	1.018	0.607	0.616	0.534	plasma membrane	GO:0006810 transport; GO:0051179 localization; GO:0051234 establishment of localization;	GO:0016020 membrane;	GO:0005215 transporter activity;	K09872			IPR023271;	Aquaporin-like;
RchiOBHm_Chr1g0370231	358	1.573	Up	0.0195222	K	Putative phosphoinositide phospholipase C	---	0.988559	4.88e-07	93.517	KPDFLLTTGPNNEVFDPQHK(0.989)SSVK(0.011)	3	1.2729	9	0.76	0.91	0.822	1.181		1.432	mitochondria	GO:0050794 regulation of cellular process; GO:0044700 single organism signaling; GO:0051716 cellular response to stimulus; GO:0035556 intracellular signal transduction; GO:0044699 single-organism process; GO:0044238 primary metabolic process; GO:0023052 signaling; GO:0050896 response to stimulus; GO:0071704 organic substance metabolic process; GO:0007165 signal transduction; GO:0008152 metabolic …		GO:0004435 phosphatidylinositol phospholipase C activity; GO:0003824 catalytic activity; GO:0042578 phosphoric ester hydrolase activity; GO:0004629 phospholipase C activity; GO:0005488 binding; GO:0016788 hydrolase activity, acting on ester bonds; GO:0004620 phospholipase activity; GO:0005515 protein binding; GO:0016787 hydrolase activity; GO:0008081 phosphoric diester hydrolase activity; GO:0016…	K05857	PLCD; phosphatidylinositol phospholipase C, delta [EC:3.1.4.11]"	mdm00562 Inositol phosphate metabolism - Malus domestica (apple); mdm04933 AGE-RAGE signaling pathway in diabetic complications - Malus domestica (apple); mdm04070 Phosphatidylinositol signaling system - Malus domestica (apple); mdm01100 Metabolic pathways - Malus domestica (apple);	IPR000909; IPR017946; IPR000008; IPR001711;	Phosphatidylinositol-specific phospholipase C, X domain; PLC-like phosphodiesterase, TIM beta/alpha-barrel domain; C2 domain; Phospholipase C, phosphatidylinositol-specific, Y domain;
RchiOBHm_Chr1g0371441	281	0.569	Down	0.023277	K	Putative NSF attachment protein	---	1	0.00941472	83.623	AK(1)ELEEDDLT	2	-0.83976	5		1.408	1.298	0.673	0.93	0.705	mitochondria	GO:0045184 establishment of protein localization; GO:0006810 transport; GO:0046907 intracellular transport; GO:0070727 cellular macromolecule localization; GO:0051649 establishment of localization in cell; GO:0006886 intracellular protein transport; GO:0071702 organic substance transport; GO:0008104 protein localization; GO:0033036 macromolecule localization; GO:0034613 cellular protein localizat…		GO:0005515 protein binding; GO:0005488 binding;	K15296			IPR011990; IPR013026;	Tetratricopeptide-like helical domain; Tetratricopeptide repeat-containing domain;
RchiOBHm_Chr1g0377691	421	0.421	Down	0.032781	K	Putative cytochrome P450	---	1	2.66e-46	241.15	FLSK(1)EGGDQGFDITGSR	2	2.74	10	1.775	1.128	1.208		0.683	0.471	chloroplast	GO:0044699 single-organism process; GO:0008152 metabolic process; GO:0055114 oxidation-reduction process; GO:0044710 single-organism metabolic process;		GO:0097159 organic cyclic compound binding; GO:1901363 heterocyclic compound binding; GO:0020037 heme binding; GO:0005506 iron ion binding; GO:0046914 transition metal ion binding; GO:0003824 catalytic activity; GO:0005488 binding; GO:0043167 ion binding; GO:0043169 cation binding; GO:0046872 metal ion binding; GO:0016705 oxidoreductase activity, acting on paired donors, with incorporation or red…
RchiOBHm_Chr1g0380731	391	0.571	Down	0.0026035	K	Putative pectinesterase	---	1	3.6e-19	166.71	DITFENYAGPQK(1)HQAVALR	3	4.2178	6	1.184	1.054	1.371	0.714	0.642	0.705	nucleus	GO:0071554 cell wall organization or biogenesis; GO:0016043 cellular component organization; GO:0071555 cell wall organization; GO:0045229 external encapsulating structure organization; GO:0009987 cellular process; GO:0071840 cellular component organization or biogenesis; GO:0042545 cell wall modification;	GO:0005618 cell wall; GO:0030312 external encapsulating structure; GO:0005623 cell; GO:0044464 cell part; GO:0071944 cell periphery;	GO:0016787 hydrolase activity; GO:0052689 carboxylic ester hydrolase activity; GO:0004857 enzyme inhibitor activity; GO:0098772 molecular function regulator; GO:0030234 enzyme regulator activity; GO:0003824 catalytic activity; GO:0030599 pectinesterase activity; GO:0016788 hydrolase activity, acting on ester bonds;				IPR011050; IPR000070; IPR006501; IPR012334;	Pectin lyase fold/virulence factor; Pectinesterase, catalytic; Pectinesterase inhibitor domain; Pectin lyase fold;
RchiOBHm_Chr1g0382371	20	0.609	Down	0.0090791	K	Putative cytochrome b5-like heme/steroid binding domain-containing protein	---	1	0.00070601	87.573	HNQTK(1)DCWLVISGK	3	-3.4439	8	1.355	1.161	1.28	0.743	0.912	0.655	cytoplasm			GO:0097159 organic cyclic compound binding; GO:1901363 heterocyclic compound binding; GO:0020037 heme binding; GO:0046906 tetrapyrrole binding; GO:0005488 binding;	K23490			IPR001199;	Cytochrome b5-like heme/steroid binding domain;
RchiOBHm_Chr1g0384501	245	2.085	Up	0.0121037	K	Putative WEB family protein	---	1	1.71e-05	122.66	IAEIHAEK(1)VEILSAELTR	3	0.90221	12	0.802	0.853	0.603	1.261	1.486	1.961	nucleus
RchiOBHm_Chr2g0087571	322	1.641	Up	0.024245	K	Putative ANTH domain-containing protein	---	1	0.000383211	163.59	ISAPK(1)EILAIEDKK	3	-2.6667	20	0.948	0.767	0.63	1.494	1.173	1.18	cytoplasm	GO:0044085 cellular component biogenesis; GO:0016043 cellular component organization; GO:0034622 cellular macromolecular complex assembly; GO:0071822 protein complex subunit organization; GO:0022607 cellular component assembly; GO:0065003 macromolecular complex assembly; GO:0048268 clathrin coat assembly; GO:0070271 protein complex biogenesis; GO:0009987 cellular process; GO:0006461 protein compl…	GO:0043226 organelle; GO:0097708 intracellular vesicle; GO:0043229 intracellular organelle; GO:0030136 clathrin-coated vesicle; GO:0031410 cytoplasmic vesicle; GO:0044464 cell part; GO:0005622 intracellular; GO:0005737 cytoplasm; GO:0031982 vesicle; GO:0044424 intracellular part; GO:0005623 cell; GO:0043227 membrane-bounded organelle; GO:0030135 coated vesicle; GO:0044444 cytoplasmic part;	GO:0030276 clathrin binding; GO:0005545 1-phosphatidylinositol binding; GO:0005488 binding; GO:0005543 phospholipid binding; GO:0035091 phosphatidylinositol binding; GO:0043167 ion binding; GO:0008289 lipid binding; GO:0005515 protein binding; GO:0043168 anion binding;				IPR013809; IPR014712; IPR008942; IPR011417;	ENTH domain; Phosphoinositide-binding clathrin adaptor, domain 2; ENTH/VHS; AP180 N-terminal homology (ANTH) domain;
RchiOBHm_Chr2g0089641	356	1.661	Up	0.0183029	K	Putative protein kinase RLK-Pelle-LRR-III family	---	0.999999	8.48e-05	130.71	ASAEVLGK(1)GSVGTSYK	2	-1.2159	5	0.877	0.798	0.711	1.19	1.452		plasma membrane	GO:0016310 phosphorylation; GO:0044267 cellular protein metabolic process; GO:0044238 primary metabolic process; GO:0044237 cellular metabolic process; GO:0006796 phosphate-containing compound metabolic process; GO:0071704 organic substance metabolic process; GO:0008152 metabolic process; GO:0006468 protein phosphorylation; GO:0006793 phosphorus metabolic process; GO:0044260 cellular macromolecul…		GO:0005524 ATP binding; GO:1901265 nucleoside phosphate binding; GO:0016773 phosphotransferase activity, alcohol group as acceptor; GO:0001882 nucleoside binding; GO:0043167 ion binding; GO:0005515 protein binding; GO:0004672 protein kinase activity; GO:0000166 nucleotide binding; GO:0097159 organic cyclic compound binding; GO:1901363 heterocyclic compound binding; GO:0032549 ribonucleoside bindi…				IPR000719; IPR013210; IPR032675; IPR013320; IPR011009;	Protein kinase domain; Leucine-rich repeat-containing N-terminal, plant-type; Leucine-rich repeat domain, L domain-like; Concanavalin A-like lectin/glucanase domain; Protein kinase-like domain;
RchiOBHm_Chr2g0089741	1130	2.58	Up	0.00030442	K	Putative sulfate-transporting ATPase	---	0.999999	2.04e-10	116.06	PSTNSK(1)ELNFPTK	3	-3.1912	6	0.653	0.597	0.586	1.63		1.528	plasma membrane		GO:0016020 membrane;	GO:0005524 ATP binding; GO:1901265 nucleoside phosphate binding; GO:0001882 nucleoside binding; GO:0043167 ion binding; GO:0016817 hydrolase activity, acting on acid anhydrides; GO:0016787 hydrolase activity; GO:0000166 nucleotide binding; GO:0017111 nucleoside-triphosphatase activity; GO:0016887 ATPase activity; GO:0097159 organic cyclic compound binding; GO:1901363 heterocyclic compound binding…				IPR003593; IPR003439; IPR027417; IPR034003; IPR029481; IPR013581; IPR013525;	AAA+ ATPase domain; ABC transporter-like; P-loop containing nucleoside triphosphate hydrolase; ATP-binding cassette transporter, PDR-like subfamily G, domain 2; ABC-transporter extracellular N-terminal domain; Plant PDR ABC transporter associated; ABC-2 type transporter;
RchiOBHm_Chr2g0094371	75	1.993	Up	0.0083247	K	Putative ribosomal protein S3	---	1	5.17e-07	146.27	ELTSVVQK(1)R	2	-2.4457	6	0.79	0.664	0.643	1.133	1.315	1.732	cytoplasm	GO:0006518 peptide metabolic process; GO:0043043 peptide biosynthetic process; GO:0044267 cellular protein metabolic process; GO:0006807 nitrogen compound metabolic process; GO:0009058 biosynthetic process; GO:0043603 cellular amide metabolic process; GO:0044238 primary metabolic process; GO:1901566 organonitrogen compound biosynthetic process; GO:1901576 organic substance biosynthetic process; G…	GO:0005840 ribosome; GO:0043229 intracellular organelle; GO:0043232 intracellular non-membrane-bounded organelle; GO:0015935 small ribosomal subunit; GO:0044446 intracellular organelle part; GO:0005737 cytoplasm; GO:0032991 macromolecular complex; GO:0044424 intracellular part; GO:0005623 cell; GO:0044422 organelle part; GO:0043228 non-membrane-bounded organelle; GO:0043226 organelle; GO:0044391 …	GO:0097159 organic cyclic compound binding; GO:1901363 heterocyclic compound binding; GO:0003723 RNA binding; GO:0005488 binding; GO:0003676 nucleic acid binding; GO:0005198 structural molecule activity; GO:0003735 structural constituent of ribosome;	K02985	RP-S3e; small subunit ribosomal protein S3e	mdm03010 Ribosome - Malus domestica (apple);	IPR009019; IPR004044; IPR001351;	K homology domain, prokaryotic type; K Homology domain, type 2; Ribosomal protein S3, C-terminal;
RchiOBHm_Chr2g0094371	82	1.629	Up	0.00083987	K	Putative ribosomal protein S3	---	0.999972	0.000359731	110.91	FKFPEK(1)GVELYAEK	3	-2.9398	17	0.802	0.714	0.831	1.257	1.22	1.346	cytoplasm	GO:0006518 peptide metabolic process; GO:0043043 peptide biosynthetic process; GO:0044267 cellular protein metabolic process; GO:0006807 nitrogen compound metabolic process; GO:0009058 biosynthetic process; GO:0043603 cellular amide metabolic process; GO:0044238 primary metabolic process; GO:1901566 organonitrogen compound biosynthetic process; GO:1901576 organic substance biosynthetic process; G…	GO:0005840 ribosome; GO:0043229 intracellular organelle; GO:0043232 intracellular non-membrane-bounded organelle; GO:0015935 small ribosomal subunit; GO:0044446 intracellular organelle part; GO:0005737 cytoplasm; GO:0032991 macromolecular complex; GO:0044424 intracellular part; GO:0005623 cell; GO:0044422 organelle part; GO:0043228 non-membrane-bounded organelle; GO:0043226 organelle; GO:0044391 …	GO:0097159 organic cyclic compound binding; GO:1901363 heterocyclic compound binding; GO:0003723 RNA binding; GO:0005488 binding; GO:0003676 nucleic acid binding; GO:0005198 structural molecule activity; GO:0003735 structural constituent of ribosome;	K02985	RP-S3e; small subunit ribosomal protein S3e	mdm03010 Ribosome - Malus domestica (apple);	IPR009019; IPR004044; IPR001351;	K homology domain, prokaryotic type; K Homology domain, type 2; Ribosomal protein S3, C-terminal;
RchiOBHm_Chr2g0095551	106	2.4	Up	0.026699	K	Putative transcription factor ARF family	---	1	0.000189019	128.68	YDK(1)EAILASDMGLK(1)QSR	3	-1.8417	13	0.439	0.406	0.952	1.322	1.597	1.393	nucleus	GO:0050794 regulation of cellular process; GO:0010468 regulation of gene expression; GO:0006355 regulation of transcription, DNA-templated; GO:0031326 regulation of cellular biosynthetic process; GO:0080090 regulation of primary metabolic process; GO:0060255 regulation of macromolecule metabolic process; GO:0019219 regulation of nucleobase-containing compound metabolic process; GO:0010556 regulat…	GO:0043226 organelle; GO:0043231 intracellular membrane-bounded organelle; GO:0043229 intracellular organelle; GO:0005634 nucleus; GO:0044464 cell part; GO:0005622 intracellular; GO:0044424 intracellular part; GO:0043227 membrane-bounded organelle; GO:0005623 cell;	GO:0097159 organic cyclic compound binding; GO:1901363 heterocyclic compound binding; GO:0003677 DNA binding; GO:0005515 protein binding; GO:0005488 binding; GO:0003676 nucleic acid binding;				IPR000270; IPR033389; IPR003340; IPR015300; IPR010525;	PB1 domain; AUX/IAA domain; B3 DNA binding domain; DNA-binding pseudobarrel domain; Auxin response factor;
RchiOBHm_Chr2g0100081	162	2.938	Up	0.000139893	K	Putative aldehyde dehydrogenase (NAD(+))	---	1	0.00317935	99.855	TIPQYMDPK(1)AVR	2	1.6514	7	0.516	0.477	0.581	1.491	1.44	1.693	cytoplasm	GO:0008152 metabolic process; GO:0055114 oxidation-reduction process; GO:0044710 single-organism metabolic process; GO:0044763 single-organism cellular process; GO:0044699 single-organism process; GO:0006081 cellular aldehyde metabolic process; GO:0009987 cellular process; GO:0044237 cellular metabolic process; GO:0071704 organic substance metabolic process;		GO:0016620 oxidoreductase activity, acting on the aldehyde or oxo group of donors, NAD or NADP as acceptor; GO:0003824 catalytic activity; GO:0004030 aldehyde dehydrogenase [NAD(P)+] activity; GO:0016491 oxidoreductase activity; GO:0016903 oxidoreductase activity, acting on the aldehyde or oxo group of donors;	K00128	ALDH; aldehyde dehydrogenase (NAD+) [EC:1.2.1.3]	mdm00071 Fatty acid degradation - Malus domestica (apple); mdm00561 Glycerolipid metabolism - Malus domestica (apple); mdm00903 Limonene and pinene degradation - Malus domestica (apple); mdm00330 Arginine and proline metabolism - Malus domestica (apple); mdm00310 Lysine degradation - Malus domestica (apple); mdm00380 Tryptophan metabolism - Malus domestica (apple); mdm01110 Biosynthesis of second…	IPR016161; IPR015590; IPR016162; IPR016163;	Aldehyde/histidinol dehydrogenase; Aldehyde dehydrogenase domain; Aldehyde dehydrogenase N-terminal domain; Aldehyde dehydrogenase, C-terminal;
RchiOBHm_Chr2g0108091	139	1.72	Up	0.027264	K	"""Putative small GTPase superfamily, ARF/SAR type, P-loop containing nucleoside triphosphate hydrolase"""	---	1	1.52e-13	229.44	IDKPGALSK(1)QALTDEMGLK	3	0.2779	12	0.808	0.789	0.606	1.29	1.249	1.25	nucleus	GO:0050794 regulation of cellular process; GO:0044700 single organism signaling; GO:0051716 cellular response to stimulus; GO:0007165 signal transduction; GO:0050789 regulation of biological process; GO:0007154 cell communication; GO:0035556 intracellular signal transduction; GO:0044699 single-organism process; GO:0007264 small GTPase mediated signal transduction; GO:0023052 signaling; GO:0050896…	GO:0005623 cell; GO:0005622 intracellular; GO:0044464 cell part;	GO:1901265 nucleoside phosphate binding; GO:0001882 nucleoside binding; GO:0043167 ion binding; GO:0000166 nucleotide binding; GO:0097159 organic cyclic compound binding; GO:1901363 heterocyclic compound binding; GO:0032549 ribonucleoside binding; GO:0097367 carbohydrate derivative binding; GO:0032553 ribonucleotide binding; GO:0005488 binding; GO:0032550 purine ribonucleoside binding; GO:0043168…	K07955			IPR005225; IPR027417;	Small GTP-binding protein domain; P-loop containing nucleoside triphosphate hydrolase;
RchiOBHm_Chr2g0118891	317	1.832	Up	0.022223	K	Putative Actin family	---	1	0.000885429	100.69	MSK(1)EITALAPSSMK	2	-0.61603	11		0.742	0.736		1.477	1.231	cytoskeleton				K10355
RchiOBHm_Chr2g0127851	119	0.554	Down	0.043699	K	Putative nucleic acid-binding protein	---	1	0.00678645	100.75	LAVDK(1)WGR	2	-1.8848	5	1.261		1.509	0.583	0.859	0.858	cytoplasm				K07466	RFA1; replication factor A1	mdm03030 DNA replication - Malus domestica (apple); mdm03440 Homologous recombination - Malus domestica (apple); mdm03430 Mismatch repair - Malus domestica (apple); mdm03420 Nucleotide excision repair - Malus domestica (apple);	IPR012340;	Nucleic acid-binding, OB-fold;
RchiOBHm_Chr2g0131831	28	3.274	Up	0.0125758	K	Putative UV excision repair protein Rad23	---	1	7.85e-11	192.6	K(1)NIEDIQGK	2	-3.0076	5	0.862	0.484	0.651		2.37	1.989	cytoplasm	GO:0033554 cellular response to stress; GO:0051603 proteolysis involved in cellular protein catabolic process; GO:0044257 cellular protein catabolic process; GO:0006725 cellular aromatic compound metabolic process; GO:0006259 DNA metabolic process; GO:0006289 nucleotide-excision repair; GO:0044267 cellular protein metabolic process; GO:0050896 response to stimulus; GO:0044237 cellular metabolic p…	GO:0043226 organelle; GO:0043231 intracellular membrane-bounded organelle; GO:0043229 intracellular organelle; GO:0005634 nucleus; GO:0044464 cell part; GO:0005622 intracellular; GO:0044424 intracellular part; GO:0043227 membrane-bounded organelle; GO:0005623 cell;	GO:0097159 organic cyclic compound binding; GO:1901363 heterocyclic compound binding; GO:0003677 DNA binding; GO:0003684 damaged DNA binding; GO:0005515 protein binding; GO:0005488 binding; GO:0003676 nucleic acid binding;	K10839	RAD23; UV excision repair protein RAD23	mdm03420 Nucleotide excision repair - Malus domestica (apple); mdm04141 Protein processing in endoplasmic reticulum - Malus domestica (apple);	IPR006636; IPR015940; IPR029071; IPR000626; IPR015360; IPR009060;	Heat shock chaperonin-binding; Ubiquitin-associated domain; Ubiquitin-related domain; Ubiquitin domain; XPC-binding domain; UBA-like;
RchiOBHm_Chr2g0131831	54	2.679	Up	0.025538	K	Putative UV excision repair protein Rad23	---	1	7.44e-25	236.95	VLK(1)DETTLADNK	2	-0.87749	5		0.823	0.497	1.377	1.972	1.955	cytoplasm	GO:0033554 cellular response to stress; GO:0051603 proteolysis involved in cellular protein catabolic process; GO:0044257 cellular protein catabolic process; GO:0006725 cellular aromatic compound metabolic process; GO:0006259 DNA metabolic process; GO:0006289 nucleotide-excision repair; GO:0044267 cellular protein metabolic process; GO:0050896 response to stimulus; GO:0044237 cellular metabolic p…	GO:0043226 organelle; GO:0043231 intracellular membrane-bounded organelle; GO:0043229 intracellular organelle; GO:0005634 nucleus; GO:0044464 cell part; GO:0005622 intracellular; GO:0044424 intracellular part; GO:0043227 membrane-bounded organelle; GO:0005623 cell;	GO:0097159 organic cyclic compound binding; GO:1901363 heterocyclic compound binding; GO:0003677 DNA binding; GO:0003684 damaged DNA binding; GO:0005515 protein binding; GO:0005488 binding; GO:0003676 nucleic acid binding;	K10839	RAD23; UV excision repair protein RAD23	mdm03420 Nucleotide excision repair - Malus domestica (apple); mdm04141 Protein processing in endoplasmic reticulum - Malus domestica (apple);	IPR006636; IPR015940; IPR029071; IPR000626; IPR015360; IPR009060;	Heat shock chaperonin-binding; Ubiquitin-associated domain; Ubiquitin-related domain; Ubiquitin domain; XPC-binding domain; UBA-like;
RchiOBHm_Chr2g0134531	625	4.173	Up	0.026902	K	Putative inorganic diphosphatase	---	0.999994	1.42e-14	177.64	QFNTIPGLMEGLAK(1)PDYATCVK	3	1.9986	13	0.157	0.781	0.251	1.964	1.503	1.495	chloroplast	GO:0006810 transport; GO:1902578 single-organism localization; GO:0006812 cation transport; GO:0006811 ion transport; GO:0044699 single-organism process; GO:0051179 localization; GO:0015672 monovalent inorganic cation transport; GO:0006818 hydrogen transport; GO:0015992 proton transport; GO:0044765 single-organism transport; GO:0051234 establishment of localization;	GO:0016020 membrane;	GO:0022804 active transmembrane transporter activity; GO:0015405 P-P-bond-hydrolysis-driven transmembrane transporter activity; GO:0004427 inorganic diphosphatase activity; GO:0016462 pyrophosphatase activity; GO:0003824 catalytic activity; GO:0015399 primary active transmembrane transporter activity; GO:0016817 hydrolase activity, acting on acid anhydrides; GO:0016787 hydrolase activity; GO:0016…	K23025
RchiOBHm_Chr2g0146271	500	0.296	Down	0.0157972	K	Putative Lung seven transmembrane receptor	---	1	1.51e-06	146.75	AVQSSNGVTNGDEEEDK(1)IE	2	2.1493	8	1.609	1.225	1.939	0.713	0.438	0.262	plasma membrane		GO:0031224 intrinsic component of membrane; GO:0016020 membrane; GO:0016021 integral component of membrane; GO:0044425 membrane part;
RchiOBHm_Chr2g0147021	76	1.767	Up	0.0160777	K	Putative ribosomal protein S2	---	1	2.9e-35	212.69	VIVAIENPK(1)DIIVQSARPYGQR	3	2.8592	20	0.549	0.863	0.678	1.124	1.181	1.389	cytoplasm	GO:0006518 peptide metabolic process; GO:0043043 peptide biosynthetic process; GO:0044267 cellular protein metabolic process; GO:0006807 nitrogen compound metabolic process; GO:0009058 biosynthetic process; GO:0043603 cellular amide metabolic process; GO:0044238 primary metabolic process; GO:1901566 organonitrogen compound biosynthetic process; GO:1901576 organic substance biosynthetic process; G…	GO:0005840 ribosome; GO:0043229 intracellular organelle; GO:0043232 intracellular non-membrane-bounded organelle; GO:0015935 small ribosomal subunit; GO:0044446 intracellular organelle part; GO:0005737 cytoplasm; GO:0032991 macromolecular complex; GO:0044424 intracellular part; GO:0005623 cell; GO:0044422 organelle part; GO:0043228 non-membrane-bounded organelle; GO:0043226 organelle; GO:0044391 …	GO:0003735 structural constituent of ribosome; GO:0005198 structural molecule activity;	K02998	RP-SAe; small subunit ribosomal protein SAe	mdm03010 Ribosome - Malus domestica (apple);	IPR023591; IPR032281;	Ribosomal protein S2, flavodoxin-like domain; 40S ribosomal protein SA, C-terminal domain;
RchiOBHm_Chr2g0147861	9	1.588	Up	0.023539	K	Putative pectinesterase	---	1	4.96e-35	217.24	SSFK(1)GYGK(1)VDELEEQAFR	3	1.5579	15	0.672	0.875	0.771	1.092	1.492	1.097	cytoplasm	GO:0071554 cell wall organization or biogenesis; GO:0016043 cellular component organization; GO:0071555 cell wall organization; GO:0045229 external encapsulating structure organization; GO:0009987 cellular process; GO:0071840 cellular component organization or biogenesis; GO:0042545 cell wall modification;	GO:0005618 cell wall; GO:0030312 external encapsulating structure; GO:0005623 cell; GO:0044464 cell part; GO:0071944 cell periphery;	GO:0016787 hydrolase activity; GO:0052689 carboxylic ester hydrolase activity; GO:0004857 enzyme inhibitor activity; GO:0098772 molecular function regulator; GO:0030234 enzyme regulator activity; GO:0003824 catalytic activity; GO:0030599 pectinesterase activity; GO:0016788 hydrolase activity, acting on ester bonds;				IPR011050; IPR000070; IPR006501; IPR012334;	Pectin lyase fold/virulence factor; Pectinesterase, catalytic; Pectinesterase inhibitor domain; Pectin lyase fold;
RchiOBHm_Chr2g0148211	704	1.522	Up	0.04444	K	Putative proton-exporting ATPase	---	1	0.00673776	88.181	VK(1)PSPKPDSWK	3	-1.9768	5	0.875	0.762	0.857		1.45	1.08	plasma membrane	GO:0009116 nucleoside metabolic process; GO:0042278 purine nucleoside metabolic process; GO:0009167 purine ribonucleoside monophosphate metabolic process; GO:0009117 nucleotide metabolic process; GO:0044699 single-organism process; GO:0046129 purine ribonucleoside biosynthetic process; GO:0009163 nucleoside biosynthetic process; GO:0009058 biosynthetic process; GO:0009156 ribonucleoside monophosp…	GO:0031224 intrinsic component of membrane; GO:0016020 membrane; GO:0016021 integral component of membrane; GO:0044425 membrane part;	GO:1901265 nucleoside phosphate binding; GO:0043167 ion binding; GO:0016817 hydrolase activity, acting on acid anhydrides; GO:0016787 hydrolase activity; GO:0000166 nucleotide binding; GO:0017111 nucleoside-triphosphatase activity; GO:0016887 ATPase activity; GO:1901363 heterocyclic compound binding; GO:0097159 organic cyclic compound binding; GO:0016462 pyrophosphatase activity; GO:0003824 catal…	K01535	PMA1; H+-transporting ATPase [EC:7.1.2.1]	mdm00190 Oxidative phosphorylation - Malus domestica (apple); mdm01100 Metabolic pathways - Malus domestica (apple);	IPR023298; IPR004014; IPR008250; IPR023299; IPR023214;	P-type ATPase, transmembrane domain; Cation-transporting P-type ATPase, N-terminal; P-type ATPase, A domain; P-type ATPase, cytoplasmic domain N; HAD-like domain;
RchiOBHm_Chr2g0148211	941	1.763	Up	0.00188383	K	Putative proton-exporting ATPase	---	1	1.45e-05	168.05	LK(1)NLDPNVISAHTV	2	0.96292	6	0.734		0.75		1.337	1.279	plasma membrane	GO:0009116 nucleoside metabolic process; GO:0042278 purine nucleoside metabolic process; GO:0009167 purine ribonucleoside monophosphate metabolic process; GO:0009117 nucleotide metabolic process; GO:0044699 single-organism process; GO:0046129 purine ribonucleoside biosynthetic process; GO:0009163 nucleoside biosynthetic process; GO:0009058 biosynthetic process; GO:0009156 ribonucleoside monophosp…	GO:0031224 intrinsic component of membrane; GO:0016020 membrane; GO:0016021 integral component of membrane; GO:0044425 membrane part;	GO:1901265 nucleoside phosphate binding; GO:0043167 ion binding; GO:0016817 hydrolase activity, acting on acid anhydrides; GO:0016787 hydrolase activity; GO:0000166 nucleotide binding; GO:0017111 nucleoside-triphosphatase activity; GO:0016887 ATPase activity; GO:1901363 heterocyclic compound binding; GO:0097159 organic cyclic compound binding; GO:0016462 pyrophosphatase activity; GO:0003824 catal…	K01535	PMA1; H+-transporting ATPase [EC:7.1.2.1]	mdm00190 Oxidative phosphorylation - Malus domestica (apple); mdm01100 Metabolic pathways - Malus domestica (apple);	IPR023298; IPR004014; IPR008250; IPR023299; IPR023214;	P-type ATPase, transmembrane domain; Cation-transporting P-type ATPase, N-terminal; P-type ATPase, A domain; P-type ATPase, cytoplasmic domain N; HAD-like domain;
RchiOBHm_Chr2g0158411	260	1.502	Up	0.049719	K	Putative SEP domain-containing protein	---	0.799915	0.000543545	90.156	LDDPANAAFLESIK(0.2)K(0.8)	3	-2.116	10	0.924	0.814	0.765	0.983	1.235	1.542	nucleus			GO:0005515 protein binding; GO:0005488 binding;	K14012	SHP1; UBX domain-containing protein 1	mdm04141 Protein processing in endoplasmic reticulum - Malus domestica (apple);	IPR029071; IPR001012; IPR012989; IPR009060;	Ubiquitin-related domain; UBX domain; SEP domain; UBA-like;
RchiOBHm_Chr2g0167051	44	1.508	Up	0.043739	K	Putative protein kinase CAMK-AMPK family	---	1	8.59e-12	178.65	IAEHALTGHK(1)VAIK	2	1.3594	12	0.847	0.905	0.63	1.013	1.2	1.378	cytoplasm	GO:0016310 phosphorylation; GO:0044267 cellular protein metabolic process; GO:0044238 primary metabolic process; GO:0044237 cellular metabolic process; GO:0006796 phosphate-containing compound metabolic process; GO:0071704 organic substance metabolic process; GO:0008152 metabolic process; GO:0006468 protein phosphorylation; GO:0006793 phosphorus metabolic process; GO:0044260 cellular macromolecul…		GO:0005524 ATP binding; GO:1901265 nucleoside phosphate binding; GO:0016773 phosphotransferase activity, alcohol group as acceptor; GO:0001882 nucleoside binding; GO:0043167 ion binding; GO:0004672 protein kinase activity; GO:0000166 nucleotide binding; GO:0097159 organic cyclic compound binding; GO:1901363 heterocyclic compound binding; GO:0032549 ribonucleoside binding; GO:0097367 carbohydrate …	K07198			IPR015940; IPR001772; IPR028375; IPR000719; IPR011009;	Ubiquitin-associated domain; Kinase associated domain 1 (KA1); KA1 domain/Ssp2, C-terminal; Protein kinase domain; Protein kinase-like domain;
RchiOBHm_Chr2g0167091	184	1.71	Up	0.0184168	K	"""Putative calcium-dependent channel, 7TM region phosphate"""	---	1	1.39e-14	189.13	IAHFYSSK(1)PQPNQFTVLVR	3	0.40882	7	0.593	0.869	0.763	1.222	1.478	1.105	chloroplast		GO:0016020 membrane;		K21989			IPR027815; IPR003864; IPR032880;	10TM putative phosphate transporter, cytosolic domain; Calcium-dependent channel, 7TM region, putative phosphate; Calcium permeable stress-gated cation channel 1, N-terminal transmembrane domain;
RchiOBHm_Chr2g0168761	1066	1.664	Up	0.0054558	K	Putative xenobiotic-transporting ATPase	---	0.999993	2.93e-05	147.02	FYDPIVGK(1)VMIDGK	3	0.015397	23	0.752	0.824	0.96	1.49	1.242	1.489	plasma membrane	GO:0006810 transport; GO:0055085 transmembrane transport; GO:0051179 localization; GO:0051234 establishment of localization;	GO:0031224 intrinsic component of membrane; GO:0016020 membrane; GO:0016021 integral component of membrane; GO:0044425 membrane part;	GO:1901265 nucleoside phosphate binding; GO:0015399 primary active transmembrane transporter activity; GO:0016817 hydrolase activity, acting on acid anhydrides; GO:0016787 hydrolase activity; GO:0016887 ATPase activity; GO:0097159 organic cyclic compound binding; GO:1901363 heterocyclic compound binding; GO:0016462 pyrophosphatase activity; GO:0003824 catalytic activity; GO:0032553 ribonucleotide…	K05658	ABCB1; ATP-binding cassette, subfamily B (MDR/TAP), member 1 [EC:7.6.2.2]"	mdm02010 ABC transporters - Malus domestica (apple);	IPR003593; IPR003439; IPR027417; IPR011527;	AAA+ ATPase domain; ABC transporter-like; P-loop containing nucleoside triphosphate hydrolase; ABC transporter type 1, transmembrane domain;
RchiOBHm_Chr2g0175771	281	1.553	Up	0.0154356	K	Putative major facilitator superfamily domain-containing protein	---	0.999975	1.78e-05	119.43	IPEEEALLSATLK(1)QEAGK	3	4.9545	6	0.676	0.782	0.912	1.395	1.159	1.127	plasma membrane							IPR020846; IPR010658;	Major facilitator superfamily domain; Nodulin-like;
RchiOBHm_Chr2g0176371	315	0.553	Down	0.033158	K	Putative mitochondrial carrier domain-containing protein	---	1	4.88e-05	109.88	K(1)IGVLGLFTR	2	-2.3336	6	1.358	1.427	1.163	0.587	0.58	1.018	cytoplasm				K15102			IPR023395;	Mitochondrial carrier domain;
RchiOBHm_Chr3g0448271	77	0.665	Down	0.045018	K	Putative 50S ribosomal protein L30e	---	1	4.28e-34	197.3	VEEVADYDK(1)VGNVLR	2	2.1275	9	1.237	1.437	1.081	1.038	0.748	0.71	endoplasmic reticulum	GO:0006725 cellular aromatic compound metabolic process; GO:0060255 regulation of macromolecule metabolic process; GO:0048519 negative regulation of biological process; GO:0044237 cellular metabolic process; GO:0071704 organic substance metabolic process; GO:0044270 cellular nitrogen compound catabolic process; GO:0008152 metabolic process; GO:0071025 RNA surveillance; GO:0046483 heterocycle meta…			K06965	PELO; protein pelota	mdm03015 mRNA surveillance pathway - Malus domestica (apple);	IPR005141; IPR029064; IPR005142; IPR005140;	eRF1 domain 2; 50S ribosomal protein L30e-like; eRF1 domain 3; eRF1 domain 1/Pelota-like;
RchiOBHm_Chr3g0449321	119	0.555	Down	0.00187857	K	Putative vacuolar protein sorting-associated protein	---	1	1.94e-05	142.08	TDLK(1)DGFVQDLVQK	2	1.8382	6	1.196	1.508	1.392	0.81	0.764	0.699	nucleus
RchiOBHm_Chr3g0451381	359	1.565	Up	0.040416	K	Putative peptide-N(4)-(N-acetyl-beta-glucosaminyl)asparagine amidase	---	1	6.42e-10	164.3	RNIIAEPALSSVLANITK(1)ECR	3	2.9573	13	0.622	0.98	0.758	1.419	1.193	1.082	nucleus				K01456	E3.5.1.52; peptide-N4-(N-acetyl-beta-glucosaminyl)asparagine amidase [EC:3.5.1.52]	mdm04141 Protein processing in endoplasmic reticulum - Malus domestica (apple);	IPR002931; IPR029071;	Transglutaminase-like; Ubiquitin-related domain;
RchiOBHm_Chr3g0451381	201	1.66	Up	0.036756	K	Putative peptide-N(4)-(N-acetyl-beta-glucosaminyl)asparagine amidase	---	1	3.41e-08	178.51	K(1)TISVGMDVALLHQGSR	3	-0.42621	10	0.765	0.934	0.598	1.243	1.055	1.515	nucleus				K01456	E3.5.1.52; peptide-N4-(N-acetyl-beta-glucosaminyl)asparagine amidase [EC:3.5.1.52]	mdm04141 Protein processing in endoplasmic reticulum - Malus domestica (apple);	IPR002931; IPR029071;	Transglutaminase-like; Ubiquitin-related domain;
RchiOBHm_Chr3g0452241	175	2.176	Up	0.0077032	K	"""Putative transferase, Pyrazolylalanine synthase"""	---	1	0.000104601	100.98	GSAGK(1)VDAFVSGIGTGGTITGAGK	3	1.3391	6	0.521	0.624		1.267	1.071	1.399	cytoplasm	GO:0000097 sulfur amino acid biosynthetic process; GO:0016053 organic acid biosynthetic process; GO:0044699 single-organism process; GO:0009058 biosynthetic process; GO:1901566 organonitrogen compound biosynthetic process; GO:0044237 cellular metabolic process; GO:0044272 sulfur compound biosynthetic process; GO:0000096 sulfur amino acid metabolic process; GO:0071704 organic substance metabolic p…		GO:0016829 lyase activity; GO:0004124 cysteine synthase activity; GO:0003824 catalytic activity; GO:0016835 carbon-oxygen lyase activity;	K01738	cysK; cysteine synthase [EC:2.5.1.47]	mdm00920 Sulfur metabolism - Malus domestica (apple); mdm00270 Cysteine and methionine metabolism - Malus domestica (apple); mdm01200 Carbon metabolism - Malus domestica (apple); mdm01230 Biosynthesis of amino acids - Malus domestica (apple); mdm01110 Biosynthesis of secondary metabolites - Malus domestica (apple); mdm01100 Metabolic pathways - Malus domestica (apple);	IPR001926;	Tryptophan synthase beta subunit-like PLP-dependent enzyme;
RchiOBHm_Chr3g0454501	215	1.918	Up	0.00082366	K	Putative mevalonate kinase	---	1	9.32e-07	166.71	PSGIDNTVSTYGNMIK(1)FR	3	-0.3722	9	0.625	0.674	0.786	1.386	1.267	1.347	nucleus	GO:0006720 isoprenoid metabolic process; GO:0044711 single-organism biosynthetic process; GO:0044763 single-organism cellular process; GO:0044699 single-organism process; GO:0009058 biosynthetic process; GO:0044255 cellular lipid metabolic process; GO:0044238 primary metabolic process; GO:1901576 organic substance biosynthetic process; GO:0044237 cellular metabolic process; GO:0044249 cellular bi…	GO:0044424 intracellular part; GO:0005623 cell; GO:0044464 cell part; GO:0005622 intracellular; GO:0005737 cytoplasm;	GO:0005524 ATP binding; GO:1901265 nucleoside phosphate binding; GO:0016773 phosphotransferase activity, alcohol group as acceptor; GO:0001882 nucleoside binding; GO:0043167 ion binding; GO:0000166 nucleotide binding; GO:0004496 mevalonate kinase activity; GO:0097159 organic cyclic compound binding; GO:1901363 heterocyclic compound binding; GO:0032549 ribonucleoside binding; GO:0097367 carbohydra…	K00869	E2.7.1.36; mevalonate kinase [EC:2.7.1.36]	mdm04146 Peroxisome - Malus domestica (apple); mdm00900 Terpenoid backbone biosynthesis - Malus domestica (apple); mdm01110 Biosynthesis of secondary metabolites - Malus domestica (apple); mdm01100 Metabolic pathways - Malus domestica (apple);	IPR020568; IPR006204; IPR014721; IPR013750;	Ribosomal protein S5 domain 2-type fold; GHMP kinase N-terminal domain; Ribosomal protein S5 domain 2-type fold, subgroup; GHMP kinase, C-terminal domain;
RchiOBHm_Chr3g0455191	466	0.546	Down	0.024317	K	"""Putative CBS domain, immunoglobulin E-set"""	---	1	3.07e-05	118.06	LVIVEAGSK(1)R	2	-0.42856	6	1.03	1.229	1.735	0.664	0.82	0.698	chloroplast							IPR014756; IPR000644; IPR032640;	Immunoglobulin E-set; CBS domain; AMP-activated protein kinase, glycogen-binding domain;
RchiOBHm_Chr3g0461811	235	1.712	Up	0.0181367	K	Putative ferroxidase	---	1	0.000351994	105.36	K(1)IAEYVTQLR	2	0.626	6	0.795	0.686	0.769	1.073	1.154	1.624	chloroplast	GO:0006879 cellular iron ion homeostasis; GO:0065008 regulation of biological quality; GO:0055076 transition metal ion homeostasis; GO:0050801 ion homeostasis; GO:0030003 cellular cation homeostasis; GO:0098771 inorganic ion homeostasis; GO:0044763 single-organism cellular process; GO:0019725 cellular homeostasis; GO:0055072 iron ion homeostasis; GO:0044699 single-organism process; GO:0055082 cel…		GO:0043169 cation binding; GO:0046872 metal ion binding; GO:0005506 iron ion binding; GO:0008199 ferric iron binding; GO:0046914 transition metal ion binding; GO:0005488 binding; GO:0043167 ion binding;	K00522			IPR012347; IPR009040; IPR009078; IPR008331;	Ferritin-related; Ferritin-like diiron domain; Ferritin-like superfamily; Ferritin/DPS protein domain;
RchiOBHm_Chr3g0463011	7	4.893	Up	0.00088425	K	Putative terminal organelle assembly protein TopJ	---	1	0.000802429	62.705	GVDYYK(1)VLQVER	2	1.0878	5	0.709	0.53	0.633	3.24	2.867		cytoskeleton	GO:0006457 protein folding; GO:0009987 cellular process;		GO:0005515 protein binding; GO:0051082 unfolded protein binding; GO:0005488 binding;	K09510			IPR008971; IPR002939; IPR001623;	HSP40/DnaJ peptide-binding; Chaperone DnaJ, C-terminal; DnaJ domain;
RchiOBHm_Chr3g0463011	325	3.179	Up	0.0222	K	Putative terminal organelle assembly protein TopJ	---	1	0.000149954	151.22	FPTK(1)LTSEQK	2	-4.0047	5	0.839	0.483	0.833	1.895	2.672		cytoskeleton	GO:0006457 protein folding; GO:0009987 cellular process;		GO:0005515 protein binding; GO:0051082 unfolded protein binding; GO:0005488 binding;	K09510			IPR008971; IPR002939; IPR001623;	HSP40/DnaJ peptide-binding; Chaperone DnaJ, C-terminal; DnaJ domain;
RchiOBHm_Chr3g0463101	206	0.527	Down	0.00057856	K	Putative pyridoxal 5'-phosphate synthase (glutamine hydrolyzing)	---	1	1.3e-05	145.75	K(1)IAAPYDLVMQTK	2	2.3106	12	1.531	1.288	1.441	0.754	0.796	0.694	cytoplasm	GO:0051188 cofactor biosynthetic process; GO:0009110 vitamin biosynthetic process; GO:0006725 cellular aromatic compound metabolic process; GO:1901615 organic hydroxy compound metabolic process; GO:0042822 pyridoxal phosphate metabolic process; GO:0044699 single-organism process; GO:0009058 biosynthetic process; GO:1901566 organonitrogen compound biosynthetic process; GO:0044237 cellular metaboli…		GO:0003824 catalytic activity;	K06215	pdxS; pyridoxal 5'-phosphate synthase pdxS subunit [EC:4.3.3.6]	mdm00750 Vitamin B6 metabolism - Malus domestica (apple);	IPR033755; IPR013785; IPR011060;	PdxS/SNZ N-terminal domain; Aldolase-type TIM barrel; Ribulose-phosphate binding barrel;
RchiOBHm_Chr3g0463701	509	2.394	Up	0.032644	K	"""Putative glycosyl transferase, family 1, Glycosyltransferase subfamily 4-like protein"""	---	1	0.0039381	69.915	IFPQTPPEIK(1)YR	3	-3.954	7	0.821	0.778	0.486		1.658	1.67	chloroplast				K06119	SQD2; sulfoquinovosyltransferase [EC:2.4.1.-]	mdm00561 Glycerolipid metabolism - Malus domestica (apple); mdm01100 Metabolic pathways - Malus domestica (apple);	IPR001296; IPR028098;	Glycosyl transferase, family 1; Glycosyltransferase subfamily 4-like, N-terminal domain;
RchiOBHm_Chr3g0464051	307	1.517	Up	0.026517	K	"""Putative Heat shock protein DnaJ, cysteine-rich"""	---	1	1.05e-09	180.17	K(1)VSATSGAASVPDDVFHR	3	-1.4223	6	0.737	0.74	0.95	1.087	1.446	1.148	nucleus			GO:0005515 protein binding; GO:0051082 unfolded protein binding; GO:0031072 heat shock protein binding; GO:0005488 binding;				IPR001305;	Heat shock protein DnaJ, cysteine-rich domain;
RchiOBHm_Chr3g0468681	270	1.608	Up	0.0092035	K	Putative proteasome endopeptidase complex	---	1	0.00110949	116.13	VEVVEAGDK(1)MEE	2	0.71375	11	0.767	0.697	0.864	1.196	1.106	1.442	cytoplasm	GO:0051603 proteolysis involved in cellular protein catabolic process; GO:0044265 cellular macromolecule catabolic process; GO:0044257 cellular protein catabolic process; GO:0044267 cellular protein metabolic process; GO:0044238 primary metabolic process; GO:0044237 cellular metabolic process; GO:0071704 organic substance metabolic process; GO:1901575 organic substance catabolic process; GO:00081…	GO:1902494 catalytic complex; GO:0000502 proteasome complex; GO:0044464 cell part; GO:0005622 intracellular; GO:0005839 proteasome core complex; GO:0032991 macromolecular complex; GO:0044424 intracellular part; GO:1905368 peptidase complex; GO:0005623 cell; GO:0043234 protein complex; GO:1905369 endopeptidase complex;	GO:0004175 endopeptidase activity; GO:0004298 threonine-type endopeptidase activity; GO:0008233 peptidase activity; GO:0070003 threonine-type peptidase activity; GO:0003824 catalytic activity; GO:0070011 peptidase activity, acting on L-amino acid peptides; GO:0016787 hydrolase activity;	K02739	PSMB7; 20S proteasome subunit beta 2 [EC:3.4.25.1]	mdm03050 Proteasome - Malus domestica (apple);	IPR029055;	Nucleophile aminohydrolases, N-terminal;
RchiOBHm_Chr3g0469911	147	0.662	Down	0.035503	K	Putative adenosine kinase	---	1	0.000395464	81.908	VEHLK(1)RPENWALVEK	3	-2.0394	6	1.297	1.342	0.942	0.702	0.796	0.874	cytoplasm	GO:0009116 nucleoside metabolic process; GO:0042278 purine nucleoside metabolic process; GO:0006725 cellular aromatic compound metabolic process; GO:0044699 single-organism process; GO:0046129 purine ribonucleoside biosynthetic process; GO:0009163 nucleoside biosynthetic process; GO:0009058 biosynthetic process; GO:1901566 organonitrogen compound biosynthetic process; GO:0043174 nucleoside salvag…		GO:0016301 kinase activity; GO:0019206 nucleoside kinase activity; GO:0016773 phosphotransferase activity, alcohol group as acceptor; GO:0003824 catalytic activity; GO:0019205 nucleobase-containing compound kinase activity; GO:0016740 transferase activity; GO:0004001 adenosine kinase activity; GO:0016772 transferase activity, transferring phosphorus-containing groups;	K00856	E2.7.1.20; adenosine kinase [EC:2.7.1.20]	mdm00230 Purine metabolism - Malus domestica (apple); mdm01100 Metabolic pathways - Malus domestica (apple);	IPR011611; IPR029056;	Carbohydrate kinase PfkB; Ribokinase-like;
RchiOBHm_Chr3g0470061	86	2.054	Up	0.012498	K	Putative vesicle-fusing ATPase	---	1	3.11e-10	173.26	KDTICIALADDTCDEPK(1)IR	3	0.92678	12	0.552	0.775	0.739	1.648	1.085	1.51	chloroplast			GO:0005524 ATP binding; GO:1901265 nucleoside phosphate binding; GO:0001882 nucleoside binding; GO:0043167 ion binding; GO:0016787 hydrolase activity; GO:0000166 nucleotide binding; GO:0097159 organic cyclic compound binding; GO:1901363 heterocyclic compound binding; GO:0032549 ribonucleoside binding; GO:0097367 carbohydrate derivative binding; GO:0003824 catalytic activity; GO:0032553 ribonucleo…	K13525	VCP; transitional endoplasmic reticulum ATPase	mdm04141 Protein processing in endoplasmic reticulum - Malus domestica (apple);	IPR029067; IPR003593; IPR003959; IPR009010; IPR004201; IPR027417; IPR003338;	CDC48 domain 2-like; AAA+ ATPase domain; ATPase, AAA-type, core; Aspartate decarboxylase-like domain; CDC48, domain 2; P-loop containing nucleoside triphosphate hydrolase; CDC48, N-terminal subdomain;
RchiOBHm_Chr3g0470311	1143	2.024	Up	0.035738	K	Putative xenobiotic-transporting ATPase	---	1	0.000170754	121.31	VIIDGK(1)DIR	2	-2.1058	6	0.528	1.052	0.531	1.208	1.549	1.515	plasma membrane	GO:0006810 transport; GO:0055085 transmembrane transport; GO:0051179 localization; GO:0051234 establishment of localization;	GO:0031224 intrinsic component of membrane; GO:0016020 membrane; GO:0016021 integral component of membrane; GO:0044425 membrane part;	GO:1901265 nucleoside phosphate binding; GO:0015399 primary active transmembrane transporter activity; GO:0016817 hydrolase activity, acting on acid anhydrides; GO:0016787 hydrolase activity; GO:0016887 ATPase activity; GO:0097159 organic cyclic compound binding; GO:1901363 heterocyclic compound binding; GO:0016462 pyrophosphatase activity; GO:0003824 catalytic activity; GO:0032553 ribonucleotide…	K05658	ABCB1; ATP-binding cassette, subfamily B (MDR/TAP), member 1 [EC:7.6.2.2]"	mdm02010 ABC transporters - Malus domestica (apple);	IPR003593; IPR003439; IPR027417; IPR011527;	AAA+ ATPase domain; ABC transporter-like; P-loop containing nucleoside triphosphate hydrolase; ABC transporter type 1, transmembrane domain;
RchiOBHm_Chr3g0470591	561	0.525	Down	0.0060012	K	Putative major facilitator superfamily	---	1	0.000833022	95.656	K(1)FREEAEAAEADFTR	3	-2.4937	6	1.583	1.345		0.693	0.832	0.781	vacuolar membrane	GO:0006810 transport; GO:0055085 transmembrane transport; GO:0051179 localization; GO:0051234 establishment of localization;	GO:0031224 intrinsic component of membrane; GO:0016020 membrane; GO:0016021 integral component of membrane; GO:0044425 membrane part;					IPR020846; IPR010658;	Major facilitator superfamily domain; Nodulin-like;
RchiOBHm_Chr3g0472001	233	1.58	Up	0.030561	K	Putative phosphopyruvate hydratase	---	0.999998	8.28e-05	108.2	EGLELLK(1)TAIEK	2	-0.03108	6	1.016	0.711	0.64	1.152	1.282	1.305	cytoplasm	GO:0006757 ATP generation from ADP; GO:0009116 nucleoside metabolic process; GO:0042278 purine nucleoside metabolic process; GO:0006165 nucleoside diphosphate phosphorylation; GO:0046031 ADP metabolic process; GO:0019362 pyridine nucleotide metabolic process; GO:0006096 glycolytic process; GO:0009167 purine ribonucleoside monophosphate metabolic process; GO:0009117 nucleotide metabolic process; G…	GO:1902494 catalytic complex; GO:0044464 cell part; GO:0005622 intracellular; GO:0005737 cytoplasm; GO:0032991 macromolecular complex; GO:0044424 intracellular part; GO:0044445 cytosolic part; GO:0005623 cell; GO:0005829 cytosol; GO:0000015 phosphopyruvate hydratase complex; GO:0044444 cytoplasmic part;	GO:0000287 magnesium ion binding; GO:0004634 phosphopyruvate hydratase activity; GO:0003824 catalytic activity; GO:0005488 binding; GO:0043167 ion binding; GO:0046872 metal ion binding; GO:0043169 cation binding; GO:0016829 lyase activity; GO:0016836 hydro-lyase activity; GO:0016835 carbon-oxygen lyase activity;	K01689	ENO; enolase [EC:4.2.1.11]	mdm01200 Carbon metabolism - Malus domestica (apple); mdm03018 RNA degradation - Malus domestica (apple); mdm01230 Biosynthesis of amino acids - Malus domestica (apple); mdm01110 Biosynthesis of secondary metabolites - Malus domestica (apple); mdm01100 Metabolic pathways - Malus domestica (apple); mdm00010 Glycolysis / Gluconeogenesis - Malus domestica (apple);	IPR029065; IPR029017; IPR020810; IPR020811;	Enolase C-terminal domain-like; Enolase N-terminal domain-like; Enolase, C-terminal TIM barrel domain; Enolase, N-terminal;
RchiOBHm_Chr3g0472001	436	1.873	Up	0.042516	K	Putative phosphopyruvate hydratase	---	1	1.13e-05	139.78	IEEELGSAAVYAGAK(1)FR	3	-0.3575	5		0.675	0.7	1.555	0.972	1.337	cytoplasm	GO:0006757 ATP generation from ADP; GO:0009116 nucleoside metabolic process; GO:0042278 purine nucleoside metabolic process; GO:0006165 nucleoside diphosphate phosphorylation; GO:0046031 ADP metabolic process; GO:0019362 pyridine nucleotide metabolic process; GO:0006096 glycolytic process; GO:0009167 purine ribonucleoside monophosphate metabolic process; GO:0009117 nucleotide metabolic process; G…	GO:1902494 catalytic complex; GO:0044464 cell part; GO:0005622 intracellular; GO:0005737 cytoplasm; GO:0032991 macromolecular complex; GO:0044424 intracellular part; GO:0044445 cytosolic part; GO:0005623 cell; GO:0005829 cytosol; GO:0000015 phosphopyruvate hydratase complex; GO:0044444 cytoplasmic part;	GO:0000287 magnesium ion binding; GO:0004634 phosphopyruvate hydratase activity; GO:0003824 catalytic activity; GO:0005488 binding; GO:0043167 ion binding; GO:0046872 metal ion binding; GO:0043169 cation binding; GO:0016829 lyase activity; GO:0016836 hydro-lyase activity; GO:0016835 carbon-oxygen lyase activity;	K01689	ENO; enolase [EC:4.2.1.11]	mdm01200 Carbon metabolism - Malus domestica (apple); mdm03018 RNA degradation - Malus domestica (apple); mdm01230 Biosynthesis of amino acids - Malus domestica (apple); mdm01110 Biosynthesis of secondary metabolites - Malus domestica (apple); mdm01100 Metabolic pathways - Malus domestica (apple); mdm00010 Glycolysis / Gluconeogenesis - Malus domestica (apple);	IPR029065; IPR029017; IPR020810; IPR020811;	Enolase C-terminal domain-like; Enolase N-terminal domain-like; Enolase, C-terminal TIM barrel domain; Enolase, N-terminal;
RchiOBHm_Chr3g0472261	112	1.824	Up	0.044158	K	Putative fructose-bisphosphate aldolase	---	1	4.52e-08	118.64	GVVELK(1)GTDGETTTQGLDGLGAR	3	2.0472	6	0.794	0.837	0.547	1.301	1.32	1.351	chloroplast	GO:0006757 ATP generation from ADP; GO:0009116 nucleoside metabolic process; GO:0042278 purine nucleoside metabolic process; GO:0006165 nucleoside diphosphate phosphorylation; GO:0046031 ADP metabolic process; GO:0019362 pyridine nucleotide metabolic process; GO:0006096 glycolytic process; GO:0009167 purine ribonucleoside monophosphate metabolic process; GO:0009117 nucleotide metabolic process; G…		GO:0016829 lyase activity; GO:0004332 fructose-bisphosphate aldolase activity; GO:0016832 aldehyde-lyase activity; GO:0003824 catalytic activity; GO:0016830 carbon-carbon lyase activity;	K01623	ALDO; fructose-bisphosphate aldolase, class I [EC:4.1.2.13]"	mdm00710 Carbon fixation in photosynthetic organisms - Malus domestica (apple); mdm00051 Fructose and mannose metabolism - Malus domestica (apple); mdm01230 Biosynthesis of amino acids - Malus domestica (apple); mdm01110 Biosynthesis of secondary metabolites - Malus domestica (apple); mdm01200 Carbon metabolism - Malus domestica (apple); mdm00030 Pentose phosphate pathway - Malus domestica (apple…	IPR013785;	Aldolase-type TIM barrel;
RchiOBHm_Chr3g0477691	338	1.786	Up	0.0106553	K	Putative ubiquitinyl hydrolase 1	---	1	3.79e-25	252.75	KESFYDLQLDVK(1)GCR	3	-0.33553	16	0.859	0.665	0.641	1.403	1.069	1.394	cytoplasm	GO:0043632 modification-dependent macromolecule catabolic process; GO:0070646 protein modification by small protein removal; GO:0044265 cellular macromolecule catabolic process; GO:0051603 proteolysis involved in cellular protein catabolic process; GO:0044257 cellular protein catabolic process; GO:0019941 modification-dependent protein catabolic process; GO:0044267 cellular protein metabolic proc…		GO:0008233 peptidase activity; GO:0036459 thiol-dependent ubiquitinyl hydrolase activity; GO:0003824 catalytic activity; GO:0005488 binding; GO:0019783 ubiquitin-like protein-specific protease activity; GO:0101005 ubiquitinyl hydrolase activity; GO:0070011 peptidase activity, acting on L-amino acid peptides; GO:0008234 cysteine-type peptidase activity; GO:0016787 hydrolase activity; GO:0005515 pr…	K11838			IPR008974; IPR024729; IPR002083; IPR001394; IPR028889; IPR029346;	TRAF-like; Ubiquitin carboxyl-terminal hydrolase 7, ICP0-binding domain; MATH/TRAF domain; Peptidase C19, ubiquitin carboxyl-terminal hydrolase; Ubiquitin specific protease domain; Ubiquitin carboxyl-terminal hydrolase, C-terminal;
RchiOBHm_Chr3g0479441	168	0.649	Down	0.0002212	K	"""Putative clostridium epsilon toxin ETX/ mosquitocidal toxin MTX2, Agglutinin"""	---	1	0.00105105	127.94	HVAFK(1)GDNGDYLR	3	-1.3612	15	1.243	1.208	1.212	0.746	0.795	0.836	cytoplasm							IPR008998; IPR023307;	Agglutinin domain; Aerolysin-like toxin, beta complex domain;
RchiOBHm_Chr3g0483421	721	1.68	Up	0.0085839	K	Putative calcium-transporting ATPase	---	1	0.000707882	103.87	NMSPADMK(1)AVIPR	3	-1.8537	15	0.918	0.665	0.689	1.287	1.178	1.353	plasma membrane	GO:0070588 calcium ion transmembrane transport; GO:0072511 divalent inorganic cation transport; GO:0098655 cation transmembrane transport; GO:0034220 ion transmembrane transport; GO:0098660 inorganic ion transmembrane transport; GO:0030001 metal ion transport; GO:0051234 establishment of localization; GO:0006810 transport; GO:0055085 transmembrane transport; GO:0006812 cation transport; GO:000681…	GO:0031224 intrinsic component of membrane; GO:0016020 membrane; GO:0016021 integral component of membrane; GO:0044425 membrane part;	GO:0042625 ATPase coupled ion transmembrane transporter activity; GO:1901265 nucleoside phosphate binding; GO:0015399 primary active transmembrane transporter activity; GO:0022892 substrate-specific transporter activity; GO:0016817 hydrolase activity, acting on acid anhydrides; GO:0005515 protein binding; GO:0016787 hydrolase activity; GO:0022891 substrate-specific transmembrane transporter activ…	K01537			IPR004014; IPR023298; IPR024750; IPR008250; IPR023299; IPR023214; IPR006068;	Cation-transporting P-type ATPase, N-terminal; P-type ATPase, transmembrane domain; Calcium-transporting P-type ATPase, N-terminal autoinhibitory domain; P-type ATPase, A domain; P-type ATPase, cytoplasmic domain N; HAD-like domain; Cation-transporting P-type ATPase, C-terminal;
RchiOBHm_Chr3g0484331	326	0.557	Down	0.0074571	K	Putative transcription factor WD40-like family	---	0.99998	0.000930421	63.766	IAFHPSGK(1)YLGTTSFDK	3	-2.2032	5	1.154	1.001	1.186	0.571		0.67	nucleus			GO:0005515 protein binding; GO:0005488 binding;	K12662	PRPF4; U4/U6 small nuclear ribonucleoprotein PRP4	mdm03040 Spliceosome - Malus domestica (apple);	IPR017986; IPR014906; IPR015943; IPR001632;	WD40-repeat-containing domain; Pre-mRNA processing factor 4 (PRP4)-like; WD40/YVTN repeat-like-containing domain; G-protein, beta subunit;
RchiOBHm_Chr3g0486231	67	2.578	Up	0.0052044	K	Putative methionine adenosyltransferase	---	1	0.000196961	146.03	ATVDYEK(1)IVR	2	-1.4882	6	0.694	0.529	0.599	1.334	2.059	1.304	cytoskeleton	GO:0051188 cofactor biosynthetic process; GO:0006790 sulfur compound metabolic process; GO:0046500 S-adenosylmethionine metabolic process; GO:0009058 biosynthetic process; GO:0006732 coenzyme metabolic process; GO:1901576 organic substance biosynthetic process; GO:0044237 cellular metabolic process; GO:0044272 sulfur compound biosynthetic process; GO:0044249 cellular biosynthetic process; GO:0051…		GO:0005524 ATP binding; GO:1901265 nucleoside phosphate binding; GO:0001882 nucleoside binding; GO:0043167 ion binding; GO:0000166 nucleotide binding; GO:0004478 methionine adenosyltransferase activity; GO:0097159 organic cyclic compound binding; GO:1901363 heterocyclic compound binding; GO:0032549 ribonucleoside binding; GO:0097367 carbohydrate derivative binding; GO:0003824 catalytic activity; …	K00789	metK; S-adenosylmethionine synthetase [EC:2.5.1.6]	mdm00270 Cysteine and methionine metabolism - Malus domestica (apple); mdm01230 Biosynthesis of amino acids - Malus domestica (apple); mdm01110 Biosynthesis of secondary metabolites - Malus domestica (apple); mdm01100 Metabolic pathways - Malus domestica (apple);	IPR022636; IPR022628; IPR022630; IPR022629;	S-adenosylmethionine synthetase superfamily; S-adenosylmethionine synthetase, N-terminal; S-adenosylmethionine synthetase, C-terminal; S-adenosylmethionine synthetase, central domain;
RchiOBHm_Chr3g0486231	370	3.624	Up	0.022622	K	Putative methionine adenosyltransferase	---	0.9964	3.42e-74	264.08	DDPDFTWEVVK(0.004)PLK(0.996)	2	0.76793	15	0.303	0.386	0.711	2.536	1.466	1.071	cytoskeleton	GO:0051188 cofactor biosynthetic process; GO:0006790 sulfur compound metabolic process; GO:0046500 S-adenosylmethionine metabolic process; GO:0009058 biosynthetic process; GO:0006732 coenzyme metabolic process; GO:1901576 organic substance biosynthetic process; GO:0044237 cellular metabolic process; GO:0044272 sulfur compound biosynthetic process; GO:0044249 cellular biosynthetic process; GO:0051…		GO:0005524 ATP binding; GO:1901265 nucleoside phosphate binding; GO:0001882 nucleoside binding; GO:0043167 ion binding; GO:0000166 nucleotide binding; GO:0004478 methionine adenosyltransferase activity; GO:0097159 organic cyclic compound binding; GO:1901363 heterocyclic compound binding; GO:0032549 ribonucleoside binding; GO:0097367 carbohydrate derivative binding; GO:0003824 catalytic activity; …	K00789	metK; S-adenosylmethionine synthetase [EC:2.5.1.6]	mdm00270 Cysteine and methionine metabolism - Malus domestica (apple); mdm01230 Biosynthesis of amino acids - Malus domestica (apple); mdm01110 Biosynthesis of secondary metabolites - Malus domestica (apple); mdm01100 Metabolic pathways - Malus domestica (apple);	IPR022636; IPR022628; IPR022630; IPR022629;	S-adenosylmethionine synthetase superfamily; S-adenosylmethionine synthetase, N-terminal; S-adenosylmethionine synthetase, C-terminal; S-adenosylmethionine synthetase, central domain;
RchiOBHm_Chr3g0486231	199	1.706	Up	0.0065649	K	Putative methionine adenosyltransferase	---	1	5.37e-11	157.77	EHVIK(1)PVIPEK	2	-0.26602	10	0.903	0.739	0.673	1.335	1.435	1.18	cytoskeleton	GO:0051188 cofactor biosynthetic process; GO:0006790 sulfur compound metabolic process; GO:0046500 S-adenosylmethionine metabolic process; GO:0009058 biosynthetic process; GO:0006732 coenzyme metabolic process; GO:1901576 organic substance biosynthetic process; GO:0044237 cellular metabolic process; GO:0044272 sulfur compound biosynthetic process; GO:0044249 cellular biosynthetic process; GO:0051…		GO:0005524 ATP binding; GO:1901265 nucleoside phosphate binding; GO:0001882 nucleoside binding; GO:0043167 ion binding; GO:0000166 nucleotide binding; GO:0004478 methionine adenosyltransferase activity; GO:0097159 organic cyclic compound binding; GO:1901363 heterocyclic compound binding; GO:0032549 ribonucleoside binding; GO:0097367 carbohydrate derivative binding; GO:0003824 catalytic activity; …	K00789	metK; S-adenosylmethionine synthetase [EC:2.5.1.6]	mdm00270 Cysteine and methionine metabolism - Malus domestica (apple); mdm01230 Biosynthesis of amino acids - Malus domestica (apple); mdm01110 Biosynthesis of secondary metabolites - Malus domestica (apple); mdm01100 Metabolic pathways - Malus domestica (apple);	IPR022636; IPR022628; IPR022630; IPR022629;	S-adenosylmethionine synthetase superfamily; S-adenosylmethionine synthetase, N-terminal; S-adenosylmethionine synthetase, C-terminal; S-adenosylmethionine synthetase, central domain;
RchiOBHm_Chr3g0486231	347	2.485	Up	0.020065	K	Putative methionine adenosyltransferase	---	1	2.52e-17	195.58	FLK(1)TAAYGHFGR	2	-0.096365	12	0.612	0.622	0.621	1.479	1.907	1.224	cytoskeleton	GO:0051188 cofactor biosynthetic process; GO:0006790 sulfur compound metabolic process; GO:0046500 S-adenosylmethionine metabolic process; GO:0009058 biosynthetic process; GO:0006732 coenzyme metabolic process; GO:1901576 organic substance biosynthetic process; GO:0044237 cellular metabolic process; GO:0044272 sulfur compound biosynthetic process; GO:0044249 cellular biosynthetic process; GO:0051…		GO:0005524 ATP binding; GO:1901265 nucleoside phosphate binding; GO:0001882 nucleoside binding; GO:0043167 ion binding; GO:0000166 nucleotide binding; GO:0004478 methionine adenosyltransferase activity; GO:0097159 organic cyclic compound binding; GO:1901363 heterocyclic compound binding; GO:0032549 ribonucleoside binding; GO:0097367 carbohydrate derivative binding; GO:0003824 catalytic activity; …	K00789	metK; S-adenosylmethionine synthetase [EC:2.5.1.6]	mdm00270 Cysteine and methionine metabolism - Malus domestica (apple); mdm01230 Biosynthesis of amino acids - Malus domestica (apple); mdm01110 Biosynthesis of secondary metabolites - Malus domestica (apple); mdm01100 Metabolic pathways - Malus domestica (apple);	IPR022636; IPR022628; IPR022630; IPR022629;	S-adenosylmethionine synthetase superfamily; S-adenosylmethionine synthetase, N-terminal; S-adenosylmethionine synthetase, C-terminal; S-adenosylmethionine synthetase, central domain;
RchiOBHm_Chr3g0486231	205	1.708	Up	0.0168979	K	Putative methionine adenosyltransferase	---	0.999999	1.37e-17	227.95	EHVIKPVIPEK(1)YLDEK	3	1.8914	20	0.696	0.836	0.792	1.026	1.514	1.429	cytoskeleton	GO:0051188 cofactor biosynthetic process; GO:0006790 sulfur compound metabolic process; GO:0046500 S-adenosylmethionine metabolic process; GO:0009058 biosynthetic process; GO:0006732 coenzyme metabolic process; GO:1901576 organic substance biosynthetic process; GO:0044237 cellular metabolic process; GO:0044272 sulfur compound biosynthetic process; GO:0044249 cellular biosynthetic process; GO:0051…		GO:0005524 ATP binding; GO:1901265 nucleoside phosphate binding; GO:0001882 nucleoside binding; GO:0043167 ion binding; GO:0000166 nucleotide binding; GO:0004478 methionine adenosyltransferase activity; GO:0097159 organic cyclic compound binding; GO:1901363 heterocyclic compound binding; GO:0032549 ribonucleoside binding; GO:0097367 carbohydrate derivative binding; GO:0003824 catalytic activity; …	K00789	metK; S-adenosylmethionine synthetase [EC:2.5.1.6]	mdm00270 Cysteine and methionine metabolism - Malus domestica (apple); mdm01230 Biosynthesis of amino acids - Malus domestica (apple); mdm01110 Biosynthesis of secondary metabolites - Malus domestica (apple); mdm01100 Metabolic pathways - Malus domestica (apple);	IPR022636; IPR022628; IPR022630; IPR022629;	S-adenosylmethionine synthetase superfamily; S-adenosylmethionine synthetase, N-terminal; S-adenosylmethionine synthetase, C-terminal; S-adenosylmethionine synthetase, central domain;
RchiOBHm_Chr3g0486231	256	4.222	Up	0.0021784	K	Putative methionine adenosyltransferase	---	0.995703	3.1e-11	75.686	IIIDTYGGWGAHGGGAFSGK(0.996)DPTK(0.004)	3	2.3446	16	0.435	0.49	0.347	2.011	2.133	1.226	cytoskeleton	GO:0051188 cofactor biosynthetic process; GO:0006790 sulfur compound metabolic process; GO:0046500 S-adenosylmethionine metabolic process; GO:0009058 biosynthetic process; GO:0006732 coenzyme metabolic process; GO:1901576 organic substance biosynthetic process; GO:0044237 cellular metabolic process; GO:0044272 sulfur compound biosynthetic process; GO:0044249 cellular biosynthetic process; GO:0051…		GO:0005524 ATP binding; GO:1901265 nucleoside phosphate binding; GO:0001882 nucleoside binding; GO:0043167 ion binding; GO:0000166 nucleotide binding; GO:0004478 methionine adenosyltransferase activity; GO:0097159 organic cyclic compound binding; GO:1901363 heterocyclic compound binding; GO:0032549 ribonucleoside binding; GO:0097367 carbohydrate derivative binding; GO:0003824 catalytic activity; …	K00789	metK; S-adenosylmethionine synthetase [EC:2.5.1.6]	mdm00270 Cysteine and methionine metabolism - Malus domestica (apple); mdm01230 Biosynthesis of amino acids - Malus domestica (apple); mdm01110 Biosynthesis of secondary metabolites - Malus domestica (apple); mdm01100 Metabolic pathways - Malus domestica (apple);	IPR022636; IPR022628; IPR022630; IPR022629;	S-adenosylmethionine synthetase superfamily; S-adenosylmethionine synthetase, N-terminal; S-adenosylmethionine synthetase, C-terminal; S-adenosylmethionine synthetase, central domain;
RchiOBHm_Chr3g0486231	338	3.837	Up	0.0046629	K	Putative methionine adenosyltransferase	---	1	3.6e-18	160.07	ENFDFRPGMMTINLDLK(1)R	3	-0.99223	14	0.379	0.395	0.575	2.353	1.605	1.218	cytoskeleton	GO:0051188 cofactor biosynthetic process; GO:0006790 sulfur compound metabolic process; GO:0046500 S-adenosylmethionine metabolic process; GO:0009058 biosynthetic process; GO:0006732 coenzyme metabolic process; GO:1901576 organic substance biosynthetic process; GO:0044237 cellular metabolic process; GO:0044272 sulfur compound biosynthetic process; GO:0044249 cellular biosynthetic process; GO:0051…		GO:0005524 ATP binding; GO:1901265 nucleoside phosphate binding; GO:0001882 nucleoside binding; GO:0043167 ion binding; GO:0000166 nucleotide binding; GO:0004478 methionine adenosyltransferase activity; GO:0097159 organic cyclic compound binding; GO:1901363 heterocyclic compound binding; GO:0032549 ribonucleoside binding; GO:0097367 carbohydrate derivative binding; GO:0003824 catalytic activity; …	K00789	metK; S-adenosylmethionine synthetase [EC:2.5.1.6]	mdm00270 Cysteine and methionine metabolism - Malus domestica (apple); mdm01230 Biosynthesis of amino acids - Malus domestica (apple); mdm01110 Biosynthesis of secondary metabolites - Malus domestica (apple); mdm01100 Metabolic pathways - Malus domestica (apple);	IPR022636; IPR022628; IPR022630; IPR022629;	S-adenosylmethionine synthetase superfamily; S-adenosylmethionine synthetase, N-terminal; S-adenosylmethionine synthetase, C-terminal; S-adenosylmethionine synthetase, central domain;
RchiOBHm_Chr3g0492431	305	2.515	Up	0.031782	K	Putative protein kinase RLK-Pelle-LRR-IX family	---	1	3.25e-12	154.71	SEIAVLTK(1)VR	2	-0.95461	5	0.545	0.445	0.858	1.493		1.605	chloroplast	GO:0016310 phosphorylation; GO:0044267 cellular protein metabolic process; GO:0044238 primary metabolic process; GO:0044237 cellular metabolic process; GO:0006796 phosphate-containing compound metabolic process; GO:0071704 organic substance metabolic process; GO:0008152 metabolic process; GO:0006468 protein phosphorylation; GO:0006793 phosphorus metabolic process; GO:0044260 cellular macromolecul…		GO:0005524 ATP binding; GO:1901265 nucleoside phosphate binding; GO:0016773 phosphotransferase activity, alcohol group as acceptor; GO:0001882 nucleoside binding; GO:0043167 ion binding; GO:0005515 protein binding; GO:0004672 protein kinase activity; GO:0000166 nucleotide binding; GO:0097159 organic cyclic compound binding; GO:1901363 heterocyclic compound binding; GO:0032549 ribonucleoside bindi…				IPR000719; IPR032675; IPR013320; IPR011009;	Protein kinase domain; Leucine-rich repeat domain, L domain-like; Concanavalin A-like lectin/glucanase domain; Protein kinase-like domain;
RchiOBHm_Chr3g0494731	712	1.568	Up	0.0011978	K	Putative 4-alpha-glucanotransferase	---	0.999999	9.19e-06	147.02	FNLEETSSFK(1)DLDDHCK	3	-0.16564	6	0.742	0.841	0.783	1.295	1.138	1.277	chloroplast	GO:0008152 metabolic process; GO:0005975 carbohydrate metabolic process; GO:0044238 primary metabolic process; GO:0071704 organic substance metabolic process;		GO:2001070 starch binding; GO:0030247 polysaccharide binding; GO:0004134 4-alpha-glucanotransferase activity; GO:0016758 transferase activity, transferring hexosyl groups; GO:0003824 catalytic activity; GO:0005488 binding; GO:0030246 carbohydrate binding; GO:0016757 transferase activity, transferring glycosyl groups; GO:0001871 pattern binding; GO:0016740 transferase activity; GO:0004133 glycogen…	K00705	malQ; 4-alpha-glucanotransferase [EC:2.4.1.25]	mdm00500 Starch and sucrose metabolism - Malus domestica (apple); mdm01110 Biosynthesis of secondary metabolites - Malus domestica (apple); mdm01100 Metabolic pathways - Malus domestica (apple);	IPR013783; IPR013784; IPR002044; IPR017853; IPR013781;	Immunoglobulin-like fold; Carbohydrate-binding-like fold; Carbohydrate binding module family 20; Glycoside hydrolase superfamily; Glycoside hydrolase, catalytic domain;
RchiOBHm_Chr3g0494731	938	1.534	Up	0.038162	K	Putative 4-alpha-glucanotransferase	---	1	4.77e-106	286.59	QAEK(1)QVIQESPVATTEK	2	1.9983	12	0.847	0.838	0.723	0.954	1.275	1.464	chloroplast	GO:0008152 metabolic process; GO:0005975 carbohydrate metabolic process; GO:0044238 primary metabolic process; GO:0071704 organic substance metabolic process;		GO:2001070 starch binding; GO:0030247 polysaccharide binding; GO:0004134 4-alpha-glucanotransferase activity; GO:0016758 transferase activity, transferring hexosyl groups; GO:0003824 catalytic activity; GO:0005488 binding; GO:0030246 carbohydrate binding; GO:0016757 transferase activity, transferring glycosyl groups; GO:0001871 pattern binding; GO:0016740 transferase activity; GO:0004133 glycogen…	K00705	malQ; 4-alpha-glucanotransferase [EC:2.4.1.25]	mdm00500 Starch and sucrose metabolism - Malus domestica (apple); mdm01110 Biosynthesis of secondary metabolites - Malus domestica (apple); mdm01100 Metabolic pathways - Malus domestica (apple);	IPR013783; IPR013784; IPR002044; IPR017853; IPR013781;	Immunoglobulin-like fold; Carbohydrate-binding-like fold; Carbohydrate binding module family 20; Glycoside hydrolase superfamily; Glycoside hydrolase, catalytic domain;
RchiOBHm_Chr4g0384991	170	0.486	Down	0.0032401	K	Putative cytochrome P450	---	1	0.000807514	94.804	K(1)EVEVFPLAK	2	-4.5096	7	1.552		1.315	0.671	0.758	0.662	chloroplast	GO:0044699 single-organism process; GO:0008152 metabolic process; GO:0055114 oxidation-reduction process; GO:0044710 single-organism metabolic process;		GO:0097159 organic cyclic compound binding; GO:1901363 heterocyclic compound binding; GO:0020037 heme binding; GO:0005506 iron ion binding; GO:0046914 transition metal ion binding; GO:0003824 catalytic activity; GO:0005488 binding; GO:0043167 ion binding; GO:0043169 cation binding; GO:0046872 metal ion binding; GO:0016705 oxidoreductase activity, acting on paired donors, with incorporation or red…	K20667
RchiOBHm_Chr4g0384991	197	0.471	Down	0.0026788	K	Putative cytochrome P450	---	0.992164	2.89e-05	147.19	LFVSLEDPK(0.992)DVDK(0.008)	2	0.74253	7	1.506	1.286	1.078	0.68	0.574	0.57	chloroplast	GO:0044699 single-organism process; GO:0008152 metabolic process; GO:0055114 oxidation-reduction process; GO:0044710 single-organism metabolic process;		GO:0097159 organic cyclic compound binding; GO:1901363 heterocyclic compound binding; GO:0020037 heme binding; GO:0005506 iron ion binding; GO:0046914 transition metal ion binding; GO:0003824 catalytic activity; GO:0005488 binding; GO:0043167 ion binding; GO:0043169 cation binding; GO:0046872 metal ion binding; GO:0016705 oxidoreductase activity, acting on paired donors, with incorporation or red…	K20667
RchiOBHm_Chr4g0389901	331	1.721	Up	0.024405	K	"""Putative thioredoxin-like, sieve element occlusion"""	---	1	5.97e-10	170.95	DNVQPIIDGSSNK(1)TVTIDVLR	3	0.99529	6	0.595	0.902	0.717	1.434	1.037	1.339	cytoplasm							IPR027942; IPR027944; IPR012336;	Sieve element occlusion, N-terminal; Sieve element occlusion, C-terminal; Thioredoxin-like fold;
RchiOBHm_Chr4g0389901	186	1.671	Up	0.0188041	K	"""Putative thioredoxin-like, sieve element occlusion"""	---	1	0.000443882	178.95	RVPILLKPADLQK(1)R	3	-1.1485	10	0.823	0.824	0.624	1.119	1.52	1.156	cytoplasm							IPR027942; IPR027944; IPR012336;	Sieve element occlusion, N-terminal; Sieve element occlusion, C-terminal; Thioredoxin-like fold;
RchiOBHm_Chr4g0389901	299	1.6	Up	0.0062445	K	"""Putative thioredoxin-like, sieve element occlusion"""	---	1	1.17e-05	140.57	K(1)LFQTPAEVMEVFK	2	2.0212	18	0.694	0.881	0.748	1.228	1.363	1.125	cytoplasm							IPR027942; IPR027944; IPR012336;	Sieve element occlusion, N-terminal; Sieve element occlusion, C-terminal; Thioredoxin-like fold;
RchiOBHm_Chr4g0400911	392	9.961	Up	0.00122348	K	Putative proton-exporting ATPase	---	1	1.01e-16	193.32	TENQDAIDAAMVGMLADPK(1)EAR	3	2.1292	25	0.152	0.207	0.234	2.726	1.178	2.003	plasma membrane	GO:0009116 nucleoside metabolic process; GO:0042278 purine nucleoside metabolic process; GO:0009167 purine ribonucleoside monophosphate metabolic process; GO:0009117 nucleotide metabolic process; GO:0044699 single-organism process; GO:0046129 purine ribonucleoside biosynthetic process; GO:0009163 nucleoside biosynthetic process; GO:0009058 biosynthetic process; GO:0009156 ribonucleoside monophosp…	GO:0031224 intrinsic component of membrane; GO:0016020 membrane; GO:0016021 integral component of membrane; GO:0044425 membrane part;	GO:1901265 nucleoside phosphate binding; GO:0043167 ion binding; GO:0016817 hydrolase activity, acting on acid anhydrides; GO:0016787 hydrolase activity; GO:0000166 nucleotide binding; GO:0017111 nucleoside-triphosphatase activity; GO:0016887 ATPase activity; GO:1901363 heterocyclic compound binding; GO:0097159 organic cyclic compound binding; GO:0016462 pyrophosphatase activity; GO:0003824 catal…	K01535	PMA1; H+-transporting ATPase [EC:7.1.2.1]	mdm00190 Oxidative phosphorylation - Malus domestica (apple); mdm01100 Metabolic pathways - Malus domestica (apple);	IPR004014; IPR023298; IPR008250; IPR023299; IPR023214;	Cation-transporting P-type ATPase, N-terminal; P-type ATPase, transmembrane domain; P-type ATPase, A domain; P-type ATPase, cytoplasmic domain N; HAD-like domain;
RchiOBHm_Chr4g0402481	451	1.627	Up	0.042485	K	Putative Mu domain-containing protein	---	0.870436	0.000465757	92.747	AAGAAAAGTPLEELVGK(0.87)TEMK(0.13)	3	2.195	6	0.605	0.728	1.004	1.286	1.075	1.441	chloroplast							IPR028565; IPR018808;	Mu homology domain; Muniscin C-terminal;
RchiOBHm_Chr4g0413571	7	3.461	Up	0.048255	K	Putative adenosylhomocysteinase	---	1	1.25e-06	178.94	ALCVEK(1)NSSGR	2	-0.5022	20	0.459	0.505	0.511	1.807	0.956	2.342	cytoplasm	GO:1901606 alpha-amino acid catabolic process; GO:0009116 nucleoside metabolic process; GO:0042278 purine nucleoside metabolic process; GO:0046498 S-adenosylhomocysteine metabolic process; GO:0006725 cellular aromatic compound metabolic process; GO:0044699 single-organism process; GO:0072523 purine-containing compound catabolic process; GO:0044237 cellular metabolic process; GO:0071704 organic su…		GO:0097159 organic cyclic compound binding; GO:1901363 heterocyclic compound binding; GO:0004013 adenosylhomocysteinase activity; GO:0016801 hydrolase activity, acting on ether bonds; GO:1901265 nucleoside phosphate binding; GO:0051287 NAD binding; GO:0003824 catalytic activity; GO:0005488 binding; GO:0016787 hydrolase activity; GO:0000166 nucleotide binding; GO:0048037 cofactor binding; GO:00168…	K01251	E3.3.1.1; adenosylhomocysteinase [EC:3.3.1.1]	mdm00270 Cysteine and methionine metabolism - Malus domestica (apple); mdm01100 Metabolic pathways - Malus domestica (apple);	IPR016040; IPR015878;	NAD(P)-binding domain; S-adenosyl-L-homocysteine hydrolase, NAD binding domain;
RchiOBHm_Chr4g0413571	17	1.677	Up	0.029221	K	Putative adenosylhomocysteinase	---	1	3.88e-16	195.8	VK(1)DMSQADFGR	2	-0.17249	22	0.966	0.76	0.616	1.158	1.219	1.55	cytoplasm	GO:1901606 alpha-amino acid catabolic process; GO:0009116 nucleoside metabolic process; GO:0042278 purine nucleoside metabolic process; GO:0046498 S-adenosylhomocysteine metabolic process; GO:0006725 cellular aromatic compound metabolic process; GO:0044699 single-organism process; GO:0072523 purine-containing compound catabolic process; GO:0044237 cellular metabolic process; GO:0071704 organic su…		GO:0097159 organic cyclic compound binding; GO:1901363 heterocyclic compound binding; GO:0004013 adenosylhomocysteinase activity; GO:0016801 hydrolase activity, acting on ether bonds; GO:1901265 nucleoside phosphate binding; GO:0051287 NAD binding; GO:0003824 catalytic activity; GO:0005488 binding; GO:0016787 hydrolase activity; GO:0000166 nucleotide binding; GO:0048037 cofactor binding; GO:00168…	K01251	E3.3.1.1; adenosylhomocysteinase [EC:3.3.1.1]	mdm00270 Cysteine and methionine metabolism - Malus domestica (apple); mdm01100 Metabolic pathways - Malus domestica (apple);	IPR016040; IPR015878;	NAD(P)-binding domain; S-adenosyl-L-homocysteine hydrolase, NAD binding domain;
RchiOBHm_Chr4g0413571	479	2.104	Up	0.00112071	K	Putative adenosylhomocysteinase	---	1	1.18e-09	103.23	DQADYISVPIEGPYK(1)PAHYR	3	0.92449	5		0.672	0.649	1.368	1.509	1.293	cytoplasm	GO:1901606 alpha-amino acid catabolic process; GO:0009116 nucleoside metabolic process; GO:0042278 purine nucleoside metabolic process; GO:0046498 S-adenosylhomocysteine metabolic process; GO:0006725 cellular aromatic compound metabolic process; GO:0044699 single-organism process; GO:0072523 purine-containing compound catabolic process; GO:0044237 cellular metabolic process; GO:0071704 organic su…		GO:0097159 organic cyclic compound binding; GO:1901363 heterocyclic compound binding; GO:0004013 adenosylhomocysteinase activity; GO:0016801 hydrolase activity, acting on ether bonds; GO:1901265 nucleoside phosphate binding; GO:0051287 NAD binding; GO:0003824 catalytic activity; GO:0005488 binding; GO:0016787 hydrolase activity; GO:0000166 nucleotide binding; GO:0048037 cofactor binding; GO:00168…	K01251	E3.3.1.1; adenosylhomocysteinase [EC:3.3.1.1]	mdm00270 Cysteine and methionine metabolism - Malus domestica (apple); mdm01100 Metabolic pathways - Malus domestica (apple);	IPR016040; IPR015878;	NAD(P)-binding domain; S-adenosyl-L-homocysteine hydrolase, NAD binding domain;
RchiOBHm_Chr4g0413571	15	2.015	Up	0.031663	K	Putative adenosylhomocysteinase	---	1	3.88e-16	171.2	EYK(1)VK(1)DMSQADFGR	2	0.45157	12	0.897	0.675	0.573	1.439		1.443	cytoplasm	GO:1901606 alpha-amino acid catabolic process; GO:0009116 nucleoside metabolic process; GO:0042278 purine nucleoside metabolic process; GO:0046498 S-adenosylhomocysteine metabolic process; GO:0006725 cellular aromatic compound metabolic process; GO:0044699 single-organism process; GO:0072523 purine-containing compound catabolic process; GO:0044237 cellular metabolic process; GO:0071704 organic su…		GO:0097159 organic cyclic compound binding; GO:1901363 heterocyclic compound binding; GO:0004013 adenosylhomocysteinase activity; GO:0016801 hydrolase activity, acting on ether bonds; GO:1901265 nucleoside phosphate binding; GO:0051287 NAD binding; GO:0003824 catalytic activity; GO:0005488 binding; GO:0016787 hydrolase activity; GO:0000166 nucleotide binding; GO:0048037 cofactor binding; GO:00168…	K01251	E3.3.1.1; adenosylhomocysteinase [EC:3.3.1.1]	mdm00270 Cysteine and methionine metabolism - Malus domestica (apple); mdm01100 Metabolic pathways - Malus domestica (apple);	IPR016040; IPR015878;	NAD(P)-binding domain; S-adenosyl-L-homocysteine hydrolase, NAD binding domain;
RchiOBHm_Chr4g0413571	454	1.797	Up	0.0045816	K	Putative adenosylhomocysteinase	---	0.999952	0.00209537	108.3	VAALHLGK(1)LGAK	2	-1.0468	6	0.837	0.788	0.627	1.254	1.298	1.494	cytoplasm	GO:1901606 alpha-amino acid catabolic process; GO:0009116 nucleoside metabolic process; GO:0042278 purine nucleoside metabolic process; GO:0046498 S-adenosylhomocysteine metabolic process; GO:0006725 cellular aromatic compound metabolic process; GO:0044699 single-organism process; GO:0072523 purine-containing compound catabolic process; GO:0044237 cellular metabolic process; GO:0071704 organic su…		GO:0097159 organic cyclic compound binding; GO:1901363 heterocyclic compound binding; GO:0004013 adenosylhomocysteinase activity; GO:0016801 hydrolase activity, acting on ether bonds; GO:1901265 nucleoside phosphate binding; GO:0051287 NAD binding; GO:0003824 catalytic activity; GO:0005488 binding; GO:0016787 hydrolase activity; GO:0000166 nucleotide binding; GO:0048037 cofactor binding; GO:00168…	K01251	E3.3.1.1; adenosylhomocysteinase [EC:3.3.1.1]	mdm00270 Cysteine and methionine metabolism - Malus domestica (apple); mdm01100 Metabolic pathways - Malus domestica (apple);	IPR016040; IPR015878;	NAD(P)-binding domain; S-adenosyl-L-homocysteine hydrolase, NAD binding domain;
RchiOBHm_Chr4g0413621	12	0.477	Down	0.0014639	K	Putative UDP-glucuronate 4-epimerase	---	1	1.34e-11	187.51	VIMASPPDTSK(1)TIK(1)LER	3	-0.23414	68	1.227	1.332	1.063	0.657	0.535	0.534	cytoplasm	GO:0008152 metabolic process; GO:0005975 carbohydrate metabolic process; GO:0044238 primary metabolic process; GO:0071704 organic substance metabolic process;		GO:0016853 isomerase activity; GO:0048037 cofactor binding; GO:0016857 racemase and epimerase activity, acting on carbohydrates and derivatives; GO:0016854 racemase and epimerase activity; GO:0003824 catalytic activity; GO:0005488 binding; GO:0050662 coenzyme binding;	K08679	E5.1.3.6; UDP-glucuronate 4-epimerase [EC:5.1.3.6]	mdm00520 Amino sugar and nucleotide sugar metabolism - Malus domestica (apple); mdm01100 Metabolic pathways - Malus domestica (apple);	IPR001509; IPR016040;	NAD-dependent epimerase/dehydratase; NAD(P)-binding domain;
RchiOBHm_Chr4g0416981	127	1.554	Up	0.0131955	K	"""Putative WPP domain, leucine-rich repeat domain, L domain-containing protein"""	---	1	6.64e-07	127.07	SIFTEK(1)YGTLSKEEAEENAK	3	3.3491	9	0.939	0.755	0.754	1.338	1.377	1.089	cytoplasm			GO:0005515 protein binding; GO:0005488 binding;	K14319	RANGAP1; Ran GTPase-activating protein 1	mdm03013 RNA transport - Malus domestica (apple);	IPR032675; IPR025265;	Leucine-rich repeat domain, L domain-like; WPP domain;
RchiOBHm_Chr4g0422871	50	1.856	Up	0.0049971	K	Putative protein-synthesizing GTPase	---	1	5.39e-08	138	STVVK(1)AISGVQTVR	2	0.78954	6	0.793	0.766	0.594	1.183	1.474	1.338	cytoplasm			GO:1901265 nucleoside phosphate binding; GO:0001882 nucleoside binding; GO:0043167 ion binding; GO:0016817 hydrolase activity, acting on acid anhydrides; GO:0016787 hydrolase activity; GO:0000166 nucleotide binding; GO:0017111 nucleoside-triphosphatase activity; GO:0097159 organic cyclic compound binding; GO:1901363 heterocyclic compound binding; GO:0032549 ribonucleoside binding; GO:0097367 carb…	K03242	EIF2S3; translation initiation factor 2 subunit 3	mdm03013 RNA transport - Malus domestica (apple);	IPR004161; IPR027417; IPR009001; IPR015256; IPR000795; IPR009000;	Translation elongation factor EFTu-like, domain 2; P-loop containing nucleoside triphosphate hydrolase; Translation elongation factor EF1A/initiation factor IF2gamma, C-terminal; Translation initiation factor 2, gamma subunit, C-terminal; Transcription factor, GTP-binding domain; Translation protein, beta-barrel domain;
RchiOBHm_Chr4g0423941	33	0.608	Down	0.0131004	K	"""Putative START-like domain, Bet v I type allergen"""	---	0.998589	0.00189128	84.102	AFVLDADNLIPK(0.999)IAPQAVK(0.001)	3	0.30668	6	1.544	1.312	1.729	1.058	0.789	0.942	cytoplasm	GO:0006952 defense response; GO:0050896 response to stimulus; GO:0006950 response to stress; GO:0009607 response to biotic stimulus;						IPR000916; IPR023393;	Bet v I/Major latex protein; START-like domain;
RchiOBHm_Chr4g0427101	69	2.003	Up	0.0096832	K	Putative methionine adenosyltransferase	---	1	4.3e-08	188.98	ANVDYEK(1)IVR	2	-0.77793	6	0.871	0.714	0.626	1.432	1.788	1.208	cytoplasm	GO:0051188 cofactor biosynthetic process; GO:0006790 sulfur compound metabolic process; GO:0046500 S-adenosylmethionine metabolic process; GO:0009058 biosynthetic process; GO:0006732 coenzyme metabolic process; GO:1901576 organic substance biosynthetic process; GO:0044237 cellular metabolic process; GO:0044272 sulfur compound biosynthetic process; GO:0044249 cellular biosynthetic process; GO:0051…		GO:0005524 ATP binding; GO:1901265 nucleoside phosphate binding; GO:0001882 nucleoside binding; GO:0043167 ion binding; GO:0000166 nucleotide binding; GO:0004478 methionine adenosyltransferase activity; GO:0097159 organic cyclic compound binding; GO:1901363 heterocyclic compound binding; GO:0032549 ribonucleoside binding; GO:0097367 carbohydrate derivative binding; GO:0003824 catalytic activity; …				IPR022636; IPR022628; IPR022630; IPR022629;	S-adenosylmethionine synthetase superfamily; S-adenosylmethionine synthetase, N-terminal; S-adenosylmethionine synthetase, C-terminal; S-adenosylmethionine synthetase, central domain;
RchiOBHm_Chr4g0427101	293	3.674	Up	0.00155568	K	Putative methionine adenosyltransferase	---	1	2.43e-11	184.27	QAAK(1)SIVASGLAR	2	1.3986	7	0.582	0.586	0.525	1.779	2.368		cytoplasm	GO:0051188 cofactor biosynthetic process; GO:0006790 sulfur compound metabolic process; GO:0046500 S-adenosylmethionine metabolic process; GO:0009058 biosynthetic process; GO:0006732 coenzyme metabolic process; GO:1901576 organic substance biosynthetic process; GO:0044237 cellular metabolic process; GO:0044272 sulfur compound biosynthetic process; GO:0044249 cellular biosynthetic process; GO:0051…		GO:0005524 ATP binding; GO:1901265 nucleoside phosphate binding; GO:0001882 nucleoside binding; GO:0043167 ion binding; GO:0000166 nucleotide binding; GO:0004478 methionine adenosyltransferase activity; GO:0097159 organic cyclic compound binding; GO:1901363 heterocyclic compound binding; GO:0032549 ribonucleoside binding; GO:0097367 carbohydrate derivative binding; GO:0003824 catalytic activity; …				IPR022636; IPR022628; IPR022630; IPR022629;	S-adenosylmethionine synthetase superfamily; S-adenosylmethionine synthetase, N-terminal; S-adenosylmethionine synthetase, C-terminal; S-adenosylmethionine synthetase, central domain;
RchiOBHm_Chr4g0431271	74	1.91	Up	0.0038848	K	Putative glyceraldehyde-3-phosphate dehydrogenase (phosphorylating)	---	1	1.38e-07	131.54	TLLFGEK(1)PVAVFGLR	2	1.9534	10	0.766	0.779	0.7	1.557		1.302	cytoplasm	GO:0006006 glucose metabolic process; GO:0044723 single-organism carbohydrate metabolic process; GO:0008152 metabolic process; GO:0055114 oxidation-reduction process; GO:0044710 single-organism metabolic process; GO:0044281 small molecule metabolic process; GO:0005996 monosaccharide metabolic process; GO:0044699 single-organism process; GO:0044238 primary metabolic process; GO:0005975 carbohydrat…		GO:0097159 organic cyclic compound binding; GO:1901363 heterocyclic compound binding; GO:0016620 oxidoreductase activity, acting on the aldehyde or oxo group of donors, NAD or NADP as acceptor; GO:1901265 nucleoside phosphate binding; GO:0051287 NAD binding; GO:0003824 catalytic activity; GO:0005488 binding; GO:0016903 oxidoreductase activity, acting on the aldehyde or oxo group of donors; GO:005…	K00134	GAPDH; glyceraldehyde 3-phosphate dehydrogenase [EC:1.2.1.12]	mdm00710 Carbon fixation in photosynthetic organisms - Malus domestica (apple); mdm01200 Carbon metabolism - Malus domestica (apple); mdm01230 Biosynthesis of amino acids - Malus domestica (apple); mdm01110 Biosynthesis of secondary metabolites - Malus domestica (apple); mdm01100 Metabolic pathways - Malus domestica (apple); mdm00010 Glycolysis / Gluconeogenesis - Malus domestica (apple);	IPR020829; IPR016040; IPR020828;	Glyceraldehyde 3-phosphate dehydrogenase, catalytic domain; NAD(P)-binding domain; Glyceraldehyde 3-phosphate dehydrogenase, NAD(P) binding domain;
RchiOBHm_Chr4g0431271	217	1.629	Up	0.0170795	K	Putative glyceraldehyde-3-phosphate dehydrogenase (phosphorylating)	---	0.989308	1.49e-06	121.86	AASFNIIPSSTGAAK(0.989)AVGK(0.011)	3	-1.0571	12	0.734	0.932	0.684	1.092	1.285	1.451	cytoplasm	GO:0006006 glucose metabolic process; GO:0044723 single-organism carbohydrate metabolic process; GO:0008152 metabolic process; GO:0055114 oxidation-reduction process; GO:0044710 single-organism metabolic process; GO:0044281 small molecule metabolic process; GO:0005996 monosaccharide metabolic process; GO:0044699 single-organism process; GO:0044238 primary metabolic process; GO:0005975 carbohydrat…		GO:0097159 organic cyclic compound binding; GO:1901363 heterocyclic compound binding; GO:0016620 oxidoreductase activity, acting on the aldehyde or oxo group of donors, NAD or NADP as acceptor; GO:1901265 nucleoside phosphate binding; GO:0051287 NAD binding; GO:0003824 catalytic activity; GO:0005488 binding; GO:0016903 oxidoreductase activity, acting on the aldehyde or oxo group of donors; GO:005…	K00134	GAPDH; glyceraldehyde 3-phosphate dehydrogenase [EC:1.2.1.12]	mdm00710 Carbon fixation in photosynthetic organisms - Malus domestica (apple); mdm01200 Carbon metabolism - Malus domestica (apple); mdm01230 Biosynthesis of amino acids - Malus domestica (apple); mdm01110 Biosynthesis of secondary metabolites - Malus domestica (apple); mdm01100 Metabolic pathways - Malus domestica (apple); mdm00010 Glycolysis / Gluconeogenesis - Malus domestica (apple);	IPR020829; IPR016040; IPR020828;	Glyceraldehyde 3-phosphate dehydrogenase, catalytic domain; NAD(P)-binding domain; Glyceraldehyde 3-phosphate dehydrogenase, NAD(P) binding domain;
RchiOBHm_Chr4g0433861	516	1.558	Up	0.041762	K	"""Putative BRO1 domain, ALIX V-shaped domain-containing protein"""	---	1	1.19e-05	159.12	FAANLK(1)QASDSDAR	3	-3.1184	6	0.868	0.721		1.216	1.259		chloroplast			GO:0005515 protein binding; GO:0005488 binding;	K12200	PDCD6IP; programmed cell death 6-interacting protein	mdm04144 Endocytosis - Malus domestica (apple);	IPR025304; IPR004328;	ALIX V-shaped domain; BRO1 domain;
RchiOBHm_Chr4g0434081	76	1.879	Up	0.003856	K	Putative fructose-bisphosphate aldolase	---	1	4.78e-08	117.45	GILAIDESNATAGK(1)R	2	2.0895	6	0.733	0.583	0.803	1.242	1.45	1.29	chloroplast	GO:0006757 ATP generation from ADP; GO:0009116 nucleoside metabolic process; GO:0042278 purine nucleoside metabolic process; GO:0006165 nucleoside diphosphate phosphorylation; GO:0046031 ADP metabolic process; GO:0019362 pyridine nucleotide metabolic process; GO:0006096 glycolytic process; GO:0009167 purine ribonucleoside monophosphate metabolic process; GO:0009117 nucleotide metabolic process; G…		GO:0016829 lyase activity; GO:0004332 fructose-bisphosphate aldolase activity; GO:0016832 aldehyde-lyase activity; GO:0003824 catalytic activity; GO:0016830 carbon-carbon lyase activity;	K01623	ALDO; fructose-bisphosphate aldolase, class I [EC:4.1.2.13]"	mdm00710 Carbon fixation in photosynthetic organisms - Malus domestica (apple); mdm00051 Fructose and mannose metabolism - Malus domestica (apple); mdm01230 Biosynthesis of amino acids - Malus domestica (apple); mdm01110 Biosynthesis of secondary metabolites - Malus domestica (apple); mdm01200 Carbon metabolism - Malus domestica (apple); mdm00030 Pentose phosphate pathway - Malus domestica (apple…	IPR013785;	Aldolase-type TIM barrel;
RchiOBHm_Chr4g0434971	100	1.883	Up	0.0127415	K	Putative universal stress protein A	---	1	1.11e-16	165.7	AK(1)DICASHGVTAK(1)TVTDIGDAK	3	1.0947	12	0.587	0.814	0.817	1.171	1.65	1.356	cytoplasm	GO:0006950 response to stress; GO:0050896 response to stimulus;						IPR006016; IPR014729;	UspA; Rossmann-like alpha/beta/alpha sandwich fold;
RchiOBHm_Chr4g0435241	330	2.141	Up	0.0127412	K	"""Putative oxidoreductase, Very-long-chain 3-oxoacyl-CoA synthase"""	---	1	1.69e-06	118.87	VGISLQK(1)DLMAIAGEALK	3	-2.6708	7	0.657	0.771	0.64	1.969	1.153	1.305	plasma membrane	GO:0044711 single-organism biosynthetic process; GO:0016053 organic acid biosynthetic process; GO:0044281 small molecule metabolic process; GO:0044763 single-organism cellular process; GO:0044699 single-organism process; GO:0044255 cellular lipid metabolic process; GO:0009058 biosynthetic process; GO:0006631 fatty acid metabolic process; GO:0044238 primary metabolic process; GO:0044237 cellular m…	GO:0016020 membrane;	GO:0016746 transferase activity, transferring acyl groups; GO:0016747 transferase activity, transferring acyl groups other than amino-acyl groups; GO:0003824 catalytic activity; GO:0016740 transferase activity;	K15397	KCS; 3-ketoacyl-CoA synthase [EC:2.3.1.199]	mdm00062 Fatty acid elongation - Malus domestica (apple); mdm01110 Biosynthesis of secondary metabolites - Malus domestica (apple); mdm01100 Metabolic pathways - Malus domestica (apple);	IPR016039; IPR013747; IPR013601;	Thiolase-like; 3-Oxoacyl-[acyl-carrier-protein (ACP)] synthase III, C-terminal; FAE1/Type III polyketide synthase-like protein;
RchiOBHm_Chr4g0435241	122	1.684	Up	0.040802	K	"""Putative oxidoreductase, Very-long-chain 3-oxoacyl-CoA synthase"""	---	1	4.25e-08	152.23	LILSNNPK(1)SVEFQMR	2	1.2712	20	0.873	0.87	0.647	1.024	1.339	1.662	plasma membrane	GO:0044711 single-organism biosynthetic process; GO:0016053 organic acid biosynthetic process; GO:0044281 small molecule metabolic process; GO:0044763 single-organism cellular process; GO:0044699 single-organism process; GO:0044255 cellular lipid metabolic process; GO:0009058 biosynthetic process; GO:0006631 fatty acid metabolic process; GO:0044238 primary metabolic process; GO:0044237 cellular m…	GO:0016020 membrane;	GO:0016746 transferase activity, transferring acyl groups; GO:0016747 transferase activity, transferring acyl groups other than amino-acyl groups; GO:0003824 catalytic activity; GO:0016740 transferase activity;	K15397	KCS; 3-ketoacyl-CoA synthase [EC:2.3.1.199]	mdm00062 Fatty acid elongation - Malus domestica (apple); mdm01110 Biosynthesis of secondary metabolites - Malus domestica (apple); mdm01100 Metabolic pathways - Malus domestica (apple);	IPR016039; IPR013747; IPR013601;	Thiolase-like; 3-Oxoacyl-[acyl-carrier-protein (ACP)] synthase III, C-terminal; FAE1/Type III polyketide synthase-like protein;
RchiOBHm_Chr4g0438621	326	1.537	Up	0.048499	K	Putative UDP-glucose 6-dehydrogenase	---	1	4.39e-05	87.942	K(1)IAILGFAFK	2	-3.4187	12	0.811	0.886	0.756	0.948	1.527	1.295	extracellular	GO:0044699 single-organism process; GO:0008152 metabolic process; GO:0055114 oxidation-reduction process; GO:0044710 single-organism metabolic process;		GO:0097159 organic cyclic compound binding; GO:1901363 heterocyclic compound binding; GO:0016614 oxidoreductase activity, acting on CH-OH group of donors; GO:0016616 oxidoreductase activity, acting on the CH-OH group of donors, NAD or NADP as acceptor; GO:1901265 nucleoside phosphate binding; GO:0003979 UDP-glucose 6-dehydrogenase activity; GO:0051287 NAD binding; GO:0003824 catalytic activity; G…	K00012	UGDH; UDPglucose 6-dehydrogenase [EC:1.1.1.22]	mdm00053 Ascorbate and aldarate metabolism - Malus domestica (apple); mdm00520 Amino sugar and nucleotide sugar metabolism - Malus domestica (apple); mdm00040 Pentose and glucuronate interconversions - Malus domestica (apple); mdm01100 Metabolic pathways - Malus domestica (apple);	IPR001732; IPR008927; IPR014027; IPR016040; IPR014026;	UDP-glucose/GDP-mannose dehydrogenase, N-terminal; 6-phosphogluconate dehydrogenase C-terminal domain-like; UDP-glucose/GDP-mannose dehydrogenase, C-terminal; NAD(P)-binding domain; UDP-glucose/GDP-mannose dehydrogenase, dimerisation;
RchiOBHm_Chr4g0438621	91	1.956	Up	0.024121	K	Putative UDP-glucose 6-dehydrogenase	---	1	1.46e-58	300.33	HVMEADIVFVSVNTPTK(1)TQGLGAGK	3	1.8347	21	0.532	0.697	0.903	1.209	1.23	1.731	extracellular	GO:0044699 single-organism process; GO:0008152 metabolic process; GO:0055114 oxidation-reduction process; GO:0044710 single-organism metabolic process;		GO:0097159 organic cyclic compound binding; GO:1901363 heterocyclic compound binding; GO:0016614 oxidoreductase activity, acting on CH-OH group of donors; GO:0016616 oxidoreductase activity, acting on the CH-OH group of donors, NAD or NADP as acceptor; GO:1901265 nucleoside phosphate binding; GO:0003979 UDP-glucose 6-dehydrogenase activity; GO:0051287 NAD binding; GO:0003824 catalytic activity; G…	K00012	UGDH; UDPglucose 6-dehydrogenase [EC:1.1.1.22]	mdm00053 Ascorbate and aldarate metabolism - Malus domestica (apple); mdm00520 Amino sugar and nucleotide sugar metabolism - Malus domestica (apple); mdm00040 Pentose and glucuronate interconversions - Malus domestica (apple); mdm01100 Metabolic pathways - Malus domestica (apple);	IPR001732; IPR008927; IPR014027; IPR016040; IPR014026;	UDP-glucose/GDP-mannose dehydrogenase, N-terminal; 6-phosphogluconate dehydrogenase C-terminal domain-like; UDP-glucose/GDP-mannose dehydrogenase, C-terminal; NAD(P)-binding domain; UDP-glucose/GDP-mannose dehydrogenase, dimerisation;
RchiOBHm_Chr4g0439131	251	8.666	Up	0.0171189	K	"""Putative calcium-dependent channel, 7TM region phosphate"""	---	1	0.00083579	100.84	LVHLK(1)SDPNK	2	1.1904	4		0.555	0.473		3.279	5.63	plasma membrane		GO:0016020 membrane;		K21989			IPR027815; IPR003864; IPR032880;	10TM putative phosphate transporter, cytosolic domain; Calcium-dependent channel, 7TM region, putative phosphate; Calcium permeable stress-gated cation channel 1, N-terminal transmembrane domain;
RchiOBHm_Chr4g0443871	79	0.637	Down	0.036499	K	Putative nucleic acid-binding protein	---	1	7.53e-58	256.4	NDQVDLMK(1)EGSTVTLR	2	2.3705	14	1.576	1.079	1.105	0.718	0.762	0.915	chloroplast				K07466	RFA1; replication factor A1	mdm03030 DNA replication - Malus domestica (apple); mdm03440 Homologous recombination - Malus domestica (apple); mdm03430 Mismatch repair - Malus domestica (apple); mdm03420 Nucleotide excision repair - Malus domestica (apple);	IPR012340;	Nucleic acid-binding, OB-fold;
RchiOBHm_Chr5g0000191	162	1.542	Up	0.033996	K	Putative small monomeric GTPase	---	0.999729	3.73e-05	120.21	TAQNVEEAFIK(1)TAATIYK	3	0.5312	4	0.721	0.839			1.164	1.242	cytoplasm	GO:0050794 regulation of cellular process; GO:0044700 single organism signaling; GO:0051716 cellular response to stimulus; GO:0007165 signal transduction; GO:0050789 regulation of biological process; GO:0007154 cell communication; GO:0035556 intracellular signal transduction; GO:0044699 single-organism process; GO:0007264 small GTPase mediated signal transduction; GO:0023052 signaling; GO:0050896…		GO:1901265 nucleoside phosphate binding; GO:0001882 nucleoside binding; GO:0043167 ion binding; GO:0000166 nucleotide binding; GO:0097159 organic cyclic compound binding; GO:1901363 heterocyclic compound binding; GO:0032549 ribonucleoside binding; GO:0097367 carbohydrate derivative binding; GO:0032553 ribonucleotide binding; GO:0005488 binding; GO:0032550 purine ribonucleoside binding; GO:0043168…	K07877			IPR005225; IPR027417;	Small GTP-binding protein domain; P-loop containing nucleoside triphosphate hydrolase;
RchiOBHm_Chr5g0001681	123	0.571	Down	0.0010593	K	Putative lysophospholipase	---	1	3.88e-05	135.28	MIDK(1)EIADGTNPK	2	2.7493	10	1.183	1.232	1.34	0.666	0.795	0.684	vacuolar membrane			GO:0016787 hydrolase activity; GO:0003824 catalytic activity;				IPR029058; IPR003140;	Alpha/Beta hydrolase fold; Phospholipase/carboxylesterase/thioesterase;
RchiOBHm_Chr5g0006171	512	1.849	Up	0.020424	K	"""Putative major facilitator, sugar transporter, major facilitator superfamily"""	---	1	7.66e-29	180.11	FVTDEDYPNDGYEMSK(1)PTTVK(1)TV	3	2.5768	17	0.736	0.483	0.789	1.411	1.199	1.102	plasma membrane	GO:0006810 transport; GO:0055085 transmembrane transport; GO:0051179 localization; GO:0051234 establishment of localization;	GO:0031224 intrinsic component of membrane; GO:0016020 membrane; GO:0016021 integral component of membrane; GO:0044425 membrane part;	GO:0022892 substrate-specific transporter activity; GO:0022891 substrate-specific transmembrane transporter activity; GO:0022857 transmembrane transporter activity; GO:0005215 transporter activity;				IPR020846;	Major facilitator superfamily domain;
RchiOBHm_Chr5g0006171	517	1.755	Up	0.0045402	K	"""Putative major facilitator, sugar transporter, major facilitator superfamily"""	---	1	2.76e-17	177.79	FVTDEDYPNDGYEMSK(1)PTTVK(1)TV	3	2.5768	17	0.781	0.586	0.72	1.117	1.325	1.221	plasma membrane	GO:0006810 transport; GO:0055085 transmembrane transport; GO:0051179 localization; GO:0051234 establishment of localization;	GO:0031224 intrinsic component of membrane; GO:0016020 membrane; GO:0016021 integral component of membrane; GO:0044425 membrane part;	GO:0022892 substrate-specific transporter activity; GO:0022891 substrate-specific transmembrane transporter activity; GO:0022857 transmembrane transporter activity; GO:0005215 transporter activity;				IPR020846;	Major facilitator superfamily domain;
RchiOBHm_Chr5g0011801	384	2.262	Up	0.04376	K	"""Putative alpha,alpha-trehalose-phosphate synthase (UDP-forming), Trehalose-phosphatase"""	---	1	8.29e-05	90.376	GK(1)DLEETQAEIYASVK	2	1.5786	6	0.657	0.559	0.651	2.013	0.835	1.376	chloroplast	GO:0016051 carbohydrate biosynthetic process; GO:0044711 single-organism biosynthetic process; GO:0044763 single-organism cellular process; GO:0044699 single-organism process; GO:0009058 biosynthetic process; GO:0005984 disaccharide metabolic process; GO:0005975 carbohydrate metabolic process; GO:0009312 oligosaccharide biosynthetic process; GO:0044238 primary metabolic process; GO:0044237 cellul…		GO:0003824 catalytic activity;	K16055	TPS; trehalose 6-phosphate synthase/phosphatase [EC:2.4.1.15 3.1.3.12]	mdm00500 Starch and sucrose metabolism - Malus domestica (apple); mdm01100 Metabolic pathways - Malus domestica (apple);	IPR001830; IPR023214;	Glycosyl transferase, family 20; HAD-like domain;
RchiOBHm_Chr5g0014961	336	2.428	Up	0.029481	K	Putative transcription factor ARF family	---	1	0.00464981	66.619	SVK(1)VGWDESTAGER	2	2.0489	4	0.854	0.666			1.671	2.02	nucleus	GO:0050794 regulation of cellular process; GO:0010468 regulation of gene expression; GO:0006355 regulation of transcription, DNA-templated; GO:0031326 regulation of cellular biosynthetic process; GO:0080090 regulation of primary metabolic process; GO:0060255 regulation of macromolecule metabolic process; GO:0019219 regulation of nucleobase-containing compound metabolic process; GO:0010556 regulat…	GO:0043226 organelle; GO:0043231 intracellular membrane-bounded organelle; GO:0043229 intracellular organelle; GO:0005634 nucleus; GO:0044464 cell part; GO:0005622 intracellular; GO:0044424 intracellular part; GO:0043227 membrane-bounded organelle; GO:0005623 cell;	GO:0097159 organic cyclic compound binding; GO:1901363 heterocyclic compound binding; GO:0003677 DNA binding; GO:0005515 protein binding; GO:0005488 binding; GO:0003676 nucleic acid binding;				IPR000270; IPR033389; IPR003340; IPR015300; IPR010525;	PB1 domain; AUX/IAA domain; B3 DNA binding domain; DNA-binding pseudobarrel domain; Auxin response factor;
RchiOBHm_Chr5g0015421	1314	1.581	Up	0.034544	K	Putative xenobiotic-transporting ATPase	---	1	4.6e-07	161.23	ILIDGCDIGK(1)FGLEDLR	3	0.6025	11	0.64	0.845	0.875	1.505	1.054	1.171	plasma membrane	GO:0006810 transport; GO:0055085 transmembrane transport; GO:0051179 localization; GO:0051234 establishment of localization;	GO:0031224 intrinsic component of membrane; GO:0016020 membrane; GO:0016021 integral component of membrane; GO:0044425 membrane part;	GO:1901265 nucleoside phosphate binding; GO:0015399 primary active transmembrane transporter activity; GO:0016817 hydrolase activity, acting on acid anhydrides; GO:0016787 hydrolase activity; GO:0016887 ATPase activity; GO:0097159 organic cyclic compound binding; GO:1901363 heterocyclic compound binding; GO:0016462 pyrophosphatase activity; GO:0003824 catalytic activity; GO:0032553 ribonucleotide…				IPR003593; IPR003439; IPR027417; IPR011527;	AAA+ ATPase domain; ABC transporter-like; P-loop containing nucleoside triphosphate hydrolase; ABC transporter type 1, transmembrane domain;
RchiOBHm_Chr5g0021271	3	0.531	Down	0.0034596	K	Putative molybdenum cofactor sulfurtransferase	---	1	1.1e-05	159.12	MEK(1)QPSQEAIAK	2	-3.4738	5	1.319	1.327	1.176	0.726		0.626	nucleus			GO:0097159 organic cyclic compound binding; GO:1901363 heterocyclic compound binding; GO:0030151 molybdenum ion binding; GO:0046914 transition metal ion binding; GO:0003824 catalytic activity; GO:0005488 binding; GO:0043167 ion binding; GO:0046872 metal ion binding; GO:0043169 cation binding; GO:0043168 anion binding; GO:0048037 cofactor binding; GO:0030170 pyridoxal phosphate binding;				IPR011037; IPR005303; IPR005302;	Pyruvate kinase-like, insert domain; MOSC, N-terminal beta barrel; Molybdenum cofactor sulfurase, C-terminal;
RchiOBHm_Chr5g0031161	588	0.157	Down	0.0061179	K	Putative phosphoenolpyruvate carboxylase	---	1	5.62e-08	165.02	INGK(1)QEVMIGYSDSGK	2	4.2706	21	1.776	2.134		0.205	0.304	0.414	cytoplasm	GO:0072350 tricarboxylic acid metabolic process; GO:0055114 oxidation-reduction process; GO:0044281 small molecule metabolic process; GO:0044763 single-organism cellular process; GO:0006099 tricarboxylic acid cycle; GO:0044699 single-organism process; GO:0044238 primary metabolic process; GO:0045333 cellular respiration; GO:0044237 cellular metabolic process; GO:0071704 organic substance metaboli…		GO:0016831 carboxy-lyase activity; GO:0016829 lyase activity; GO:0008964 phosphoenolpyruvate carboxylase activity; GO:0003824 catalytic activity; GO:0016830 carbon-carbon lyase activity; GO:0004611 phosphoenolpyruvate carboxykinase activity;	K01595	ppc; phosphoenolpyruvate carboxylase [EC:4.1.1.31]	mdm00620 Pyruvate metabolism - Malus domestica (apple); mdm00710 Carbon fixation in photosynthetic organisms - Malus domestica (apple); mdm01200 Carbon metabolism - Malus domestica (apple); mdm01100 Metabolic pathways - Malus domestica (apple);	IPR015813;	Pyruvate/Phosphoenolpyruvate kinase-like domain;
RchiOBHm_Chr5g0031161	863	1.513	Up	0.038895	K	Putative phosphoenolpyruvate carboxylase	---	1	1.27e-07	176.97	ADYAETQK(1)YLLQIAGHK	3	0.51837	5	0.878	0.718	0.827	1.079		1.365	cytoplasm	GO:0072350 tricarboxylic acid metabolic process; GO:0055114 oxidation-reduction process; GO:0044281 small molecule metabolic process; GO:0044763 single-organism cellular process; GO:0006099 tricarboxylic acid cycle; GO:0044699 single-organism process; GO:0044238 primary metabolic process; GO:0045333 cellular respiration; GO:0044237 cellular metabolic process; GO:0071704 organic substance metaboli…		GO:0016831 carboxy-lyase activity; GO:0016829 lyase activity; GO:0008964 phosphoenolpyruvate carboxylase activity; GO:0003824 catalytic activity; GO:0016830 carbon-carbon lyase activity; GO:0004611 phosphoenolpyruvate carboxykinase activity;	K01595	ppc; phosphoenolpyruvate carboxylase [EC:4.1.1.31]	mdm00620 Pyruvate metabolism - Malus domestica (apple); mdm00710 Carbon fixation in photosynthetic organisms - Malus domestica (apple); mdm01200 Carbon metabolism - Malus domestica (apple); mdm01100 Metabolic pathways - Malus domestica (apple);	IPR015813;	Pyruvate/Phosphoenolpyruvate kinase-like domain;
RchiOBHm_Chr5g0031591	399	1.52	Up	0.021305	K	"""Putative sodium/calcium exchanger membrane region, EF-hand domain pair"""	---	1	7.24e-12	199.54	ILDDFHEQTK(1)K(1)EHQLIVR	4	0.68761	13	0.924	0.797	0.733	1.031	1.319	1.379	plasma membrane	GO:0006810 transport; GO:0055085 transmembrane transport; GO:0051179 localization; GO:0051234 establishment of localization;	GO:0031224 intrinsic component of membrane; GO:0016020 membrane; GO:0016021 integral component of membrane; GO:0044425 membrane part;	GO:0043169 cation binding; GO:0046872 metal ion binding; GO:0005509 calcium ion binding; GO:0005488 binding; GO:0043167 ion binding;				IPR004837; IPR011992; IPR002048;	Sodium/calcium exchanger membrane region; EF-hand domain pair; EF-hand domain;
RchiOBHm_Chr5g0031591	400	1.52	Up	0.021305	K	"""Putative sodium/calcium exchanger membrane region, EF-hand domain pair"""	---	1	1.58e-07	154.71	K(1)EHQLIVR	2	-3.1741	14	0.924	0.797	0.733	1.031	1.319	1.379	plasma membrane	GO:0006810 transport; GO:0055085 transmembrane transport; GO:0051179 localization; GO:0051234 establishment of localization;	GO:0031224 intrinsic component of membrane; GO:0016020 membrane; GO:0016021 integral component of membrane; GO:0044425 membrane part;	GO:0043169 cation binding; GO:0046872 metal ion binding; GO:0005509 calcium ion binding; GO:0005488 binding; GO:0043167 ion binding;				IPR004837; IPR011992; IPR002048;	Sodium/calcium exchanger membrane region; EF-hand domain pair; EF-hand domain;
RchiOBHm_Chr5g0036241	408	1.55	Up	0.042197	K	Putative ubiquitinyl hydrolase 1	---	1	8.99e-05	110.58	MFK(1)AVIAASHPEFSSMR	3	0.28987	7		0.674	0.833	1.174	1.008	1.322	cytoplasm	GO:0043632 modification-dependent macromolecule catabolic process; GO:0070646 protein modification by small protein removal; GO:0044265 cellular macromolecule catabolic process; GO:0051603 proteolysis involved in cellular protein catabolic process; GO:0044257 cellular protein catabolic process; GO:0019941 modification-dependent protein catabolic process; GO:0044267 cellular protein metabolic proc…		GO:0004843 thiol-dependent ubiquitin-specific protease activity; GO:0008233 peptidase activity; GO:0046914 transition metal ion binding; GO:0036459 thiol-dependent ubiquitinyl hydrolase activity; GO:0003824 catalytic activity; GO:0005488 binding; GO:0043167 ion binding; GO:0043169 cation binding; GO:0046872 metal ion binding; GO:0101005 ubiquitinyl hydrolase activity; GO:0070011 peptidase activit…	K11836			IPR001607; IPR015940; IPR013083; IPR001394; IPR028889; IPR009060;	Zinc finger, UBP-type; Ubiquitin-associated domain; Zinc finger, RING/FYVE/PHD-type; Peptidase C19, ubiquitin carboxyl-terminal hydrolase; Ubiquitin specific protease domain; UBA-like;
RchiOBHm_Chr5g0039651	221	1.552	Up	0.0032188	K	Putative calcium/calmodulin-dependent protein kinase CAMK-CDPK family	---	0.999999	0.00518399	71.896	DLK(1)PENFLLSSK	2	0.18667	5	0.858	0.854	0.778	1.339	1.237		cytoplasm	GO:0016310 phosphorylation; GO:0044267 cellular protein metabolic process; GO:0044238 primary metabolic process; GO:0044237 cellular metabolic process; GO:0006796 phosphate-containing compound metabolic process; GO:0071704 organic substance metabolic process; GO:0008152 metabolic process; GO:0006468 protein phosphorylation; GO:0006793 phosphorus metabolic process; GO:0044260 cellular macromolecul…		GO:0005524 ATP binding; GO:1901265 nucleoside phosphate binding; GO:0016773 phosphotransferase activity, alcohol group as acceptor; GO:0001882 nucleoside binding; GO:0043167 ion binding; GO:0004672 protein kinase activity; GO:0000166 nucleotide binding; GO:0097159 organic cyclic compound binding; GO:1901363 heterocyclic compound binding; GO:0032549 ribonucleoside binding; GO:0097367 carbohydrate …	K13412	CPK; calcium-dependent protein kinase [EC:2.7.11.1]	mdm04626 Plant-pathogen interaction - Malus domestica (apple);	IPR000719; IPR011992; IPR002048; IPR011009;	Protein kinase domain; EF-hand domain pair; EF-hand domain; Protein kinase-like domain;
RchiOBHm_Chr5g0041671	91	1.673	Up	0.033761	K	Putative target SNARE coiled-coil domain-containing protein	---	1	2.67e-104	277.54	SK(1)VNQMSSTLTSNSGNR	2	11.305	43	0.575	0.731	0.989	1.132	1.311	1.397	Golgi apparatus			GO:0005515 protein binding; GO:0005488 binding;	K08503	SYP5; syntaxin of plants SYP5	mdm04130 SNARE interactions in vesicular transport - Malus domestica (apple);	IPR000727;	Target SNARE coiled-coil homology domain;
RchiOBHm_Chr5g0041671	148	1.671	Up	0.030525	K	Putative target SNARE coiled-coil domain-containing protein	---	1	2.53e-06	169.52	EQDEGLDK(1)LEETVVSTK	3	-2.1146	6	0.587	0.845	0.899	1.504	1.109	1.283	Golgi apparatus			GO:0005515 protein binding; GO:0005488 binding;	K08503	SYP5; syntaxin of plants SYP5	mdm04130 SNARE interactions in vesicular transport - Malus domestica (apple);	IPR000727;	Target SNARE coiled-coil homology domain;
RchiOBHm_Chr5g0041671	140	2.224	Up	0.0115569	K	Putative target SNARE coiled-coil domain-containing protein	---	0.999967	4.67e-09	105.19	QVMK(1)EQDEGLDKLEETVVSTK	3	3.3189	8	0.569	0.604			1.199	1.41	Golgi apparatus			GO:0005515 protein binding; GO:0005488 binding;	K08503	SYP5; syntaxin of plants SYP5	mdm04130 SNARE interactions in vesicular transport - Malus domestica (apple);	IPR000727;	Target SNARE coiled-coil homology domain;
RchiOBHm_Chr5g0055091	288	1.754	Up	0.00118124	K	Putative xenobiotic-transporting ATPase	---	1	1.25e-05	162.52	DSGIK(1)PDPEIDAFMK	2	1.9693	30	0.629	0.685	0.746	1.138	1.155	1.32	plasma membrane		GO:0016020 membrane;	GO:0005524 ATP binding; GO:1901265 nucleoside phosphate binding; GO:0001882 nucleoside binding; GO:0043167 ion binding; GO:0016817 hydrolase activity, acting on acid anhydrides; GO:0016787 hydrolase activity; GO:0000166 nucleotide binding; GO:0017111 nucleoside-triphosphatase activity; GO:0016887 ATPase activity; GO:0097159 organic cyclic compound binding; GO:1901363 heterocyclic compound binding…				IPR034001; IPR003593; IPR003439; IPR027417; IPR029481; IPR013581; IPR034003; IPR013525;	ATP-binding cassette transporter, PDR-like subfamily G, domain 1; AAA+ ATPase domain; ABC transporter-like; P-loop containing nucleoside triphosphate hydrolase; ABC-transporter extracellular N-terminal domain; Plant PDR ABC transporter associated; ATP-binding cassette transporter, PDR-like subfamily G, domain 2; ABC-2 type transporter;
RchiOBHm_Chr5g0063111	84	1.677	Up	0.031044	K	Putative ribosomal protein S8	---	1	0.000621946	112.73	FDVGVK(1)EIEGWTAR	3	-2.4081	10	0.576	0.956	0.79	1.397	1.373	1.123	cytoplasm	GO:0006518 peptide metabolic process; GO:0043043 peptide biosynthetic process; GO:0044267 cellular protein metabolic process; GO:0006807 nitrogen compound metabolic process; GO:0009058 biosynthetic process; GO:0043603 cellular amide metabolic process; GO:0044238 primary metabolic process; GO:1901566 organonitrogen compound biosynthetic process; GO:1901576 organic substance biosynthetic process; G…	GO:0005840 ribosome; GO:0043226 organelle; GO:0043229 intracellular organelle; GO:0043232 intracellular non-membrane-bounded organelle; GO:0044464 cell part; GO:0005622 intracellular; GO:0005737 cytoplasm; GO:0032991 macromolecular complex; GO:0044424 intracellular part; GO:1990904 ribonucleoprotein complex; GO:0005623 cell; GO:0030529 intracellular ribonucleoprotein complex; GO:0044444 cytoplasm…	GO:0003735 structural constituent of ribosome; GO:0005198 structural molecule activity;	K02957	RP-S15Ae; small subunit ribosomal protein S15Ae	mdm03010 Ribosome - Malus domestica (apple);
RchiOBHm_Chr5g0073591	240	1.794	Up	0.0078368	K	Putative Root phototropism protein	---	1	5.09e-10	208.35	DHSGAGTK(1)SLESDDSDIR	3	0.41825	7	0.878	0.969	0.826	1.287	1.843	1.666	chloroplast			GO:0005515 protein binding; GO:0005488 binding;				IPR011333; IPR027356; IPR000210;	SKP1/BTB/POZ domain; NPH3 domain; BTB/POZ domain;
RchiOBHm_Chr5g0073591	424	3.979	Up	0.0049016	K	Putative Root phototropism protein	---	1	7.37e-10	150.21	EK(1)VCSVMDALK	2	-1.3523	40	0.693	0.935	0.428	2.424	3.345	2.411	chloroplast			GO:0005515 protein binding; GO:0005488 binding;				IPR011333; IPR027356; IPR000210;	SKP1/BTB/POZ domain; NPH3 domain; BTB/POZ domain;
RchiOBHm_Chr5g0075541	543	1.768	Up	0.0185576	K	Putative Heat shock protein Hsp90 family	---	0.99807	0.0139815	74.486	FEGLCK(0.998)VVK(0.002)	2	-3.2411	6	0.759	0.94	0.704		1.318	1.514	cytoplasm	GO:0006457 protein folding; GO:0006950 response to stress; GO:0050896 response to stimulus; GO:0009987 cellular process;		GO:0005524 ATP binding; GO:1901265 nucleoside phosphate binding; GO:0001882 nucleoside binding; GO:0043167 ion binding; GO:0005515 protein binding; GO:0000166 nucleotide binding; GO:0097159 organic cyclic compound binding; GO:1901363 heterocyclic compound binding; GO:0032549 ribonucleoside binding; GO:0097367 carbohydrate derivative binding; GO:0032553 ribonucleotide binding; GO:0005488 binding; …	K04079	HSP90A; molecular chaperone HtpG	mdm04626 Plant-pathogen interaction - Malus domestica (apple); mdm04141 Protein processing in endoplasmic reticulum - Malus domestica (apple);	IPR020568; IPR020575; IPR003594;	Ribosomal protein S5 domain 2-type fold; Heat shock protein Hsp90, N-terminal; Histidine kinase-like ATPase, C-terminal domain;
RchiOBHm_Chr5g0075541	413	1.692	Up	0.008678	K	Putative Heat shock protein Hsp90 family	---	0.936707	0.000369182	100.84	FYESFSK(0.937)NLK(0.063)	2	-1.9653	5	0.751	0.755	0.908		1.306	1.417	cytoplasm	GO:0006457 protein folding; GO:0006950 response to stress; GO:0050896 response to stimulus; GO:0009987 cellular process;		GO:0005524 ATP binding; GO:1901265 nucleoside phosphate binding; GO:0001882 nucleoside binding; GO:0043167 ion binding; GO:0005515 protein binding; GO:0000166 nucleotide binding; GO:0097159 organic cyclic compound binding; GO:1901363 heterocyclic compound binding; GO:0032549 ribonucleoside binding; GO:0097367 carbohydrate derivative binding; GO:0032553 ribonucleotide binding; GO:0005488 binding; …	K04079	HSP90A; molecular chaperone HtpG	mdm04626 Plant-pathogen interaction - Malus domestica (apple); mdm04141 Protein processing in endoplasmic reticulum - Malus domestica (apple);	IPR020568; IPR020575; IPR003594;	Ribosomal protein S5 domain 2-type fold; Heat shock protein Hsp90, N-terminal; Histidine kinase-like ATPase, C-terminal domain;
RchiOBHm_Chr5g0075541	555	1.829	Up	0.0062169	K	Putative Heat shock protein Hsp90 family	---	1	0.000186636	132.9	VEK(1)VVVSDR	2	-1.1243	7	0.742	0.893	0.811	1.384		1.598	cytoplasm	GO:0006457 protein folding; GO:0006950 response to stress; GO:0050896 response to stimulus; GO:0009987 cellular process;		GO:0005524 ATP binding; GO:1901265 nucleoside phosphate binding; GO:0001882 nucleoside binding; GO:0043167 ion binding; GO:0005515 protein binding; GO:0000166 nucleotide binding; GO:0097159 organic cyclic compound binding; GO:1901363 heterocyclic compound binding; GO:0032549 ribonucleoside binding; GO:0097367 carbohydrate derivative binding; GO:0032553 ribonucleotide binding; GO:0005488 binding; …	K04079	HSP90A; molecular chaperone HtpG	mdm04626 Plant-pathogen interaction - Malus domestica (apple); mdm04141 Protein processing in endoplasmic reticulum - Malus domestica (apple);	IPR020568; IPR020575; IPR003594;	Ribosomal protein S5 domain 2-type fold; Heat shock protein Hsp90, N-terminal; Histidine kinase-like ATPase, C-terminal domain;
RchiOBHm_Chr5g0075541	377	1.723	Up	0.038276	K	Putative Heat shock protein Hsp90 family	---	0.999858	0.000918504	118.06	EMLQQNK(1)ILK	2	-2.186	9	0.801	0.701	1.046	1.196	1.334	1.86	cytoplasm	GO:0006457 protein folding; GO:0006950 response to stress; GO:0050896 response to stimulus; GO:0009987 cellular process;		GO:0005524 ATP binding; GO:1901265 nucleoside phosphate binding; GO:0001882 nucleoside binding; GO:0043167 ion binding; GO:0005515 protein binding; GO:0000166 nucleotide binding; GO:0097159 organic cyclic compound binding; GO:1901363 heterocyclic compound binding; GO:0032549 ribonucleoside binding; GO:0097367 carbohydrate derivative binding; GO:0032553 ribonucleotide binding; GO:0005488 binding; …	K04079	HSP90A; molecular chaperone HtpG	mdm04626 Plant-pathogen interaction - Malus domestica (apple); mdm04141 Protein processing in endoplasmic reticulum - Malus domestica (apple);	IPR020568; IPR020575; IPR003594;	Ribosomal protein S5 domain 2-type fold; Heat shock protein Hsp90, N-terminal; Histidine kinase-like ATPase, C-terminal domain;
RchiOBHm_Chr5g0075541	448	1.672	Up	0.005197	K	Putative Heat shock protein Hsp90 family	---	1	9.91e-12	166.71	SGDEMTSLK(1)DYVTR	2	2.7024	12	0.89	0.786	0.896	1.656	1.252	1.393	cytoplasm	GO:0006457 protein folding; GO:0006950 response to stress; GO:0050896 response to stimulus; GO:0009987 cellular process;		GO:0005524 ATP binding; GO:1901265 nucleoside phosphate binding; GO:0001882 nucleoside binding; GO:0043167 ion binding; GO:0005515 protein binding; GO:0000166 nucleotide binding; GO:0097159 organic cyclic compound binding; GO:1901363 heterocyclic compound binding; GO:0032549 ribonucleoside binding; GO:0097367 carbohydrate derivative binding; GO:0032553 ribonucleotide binding; GO:0005488 binding; …	K04079	HSP90A; molecular chaperone HtpG	mdm04626 Plant-pathogen interaction - Malus domestica (apple); mdm04141 Protein processing in endoplasmic reticulum - Malus domestica (apple);	IPR020568; IPR020575; IPR003594;	Ribosomal protein S5 domain 2-type fold; Heat shock protein Hsp90, N-terminal; Histidine kinase-like ATPase, C-terminal domain;
RchiOBHm_Chr5g0075541	56	1.634	Up	0.03088	K	Putative Heat shock protein Hsp90 family	---	1	0.000226895	125.5	SK(1)LESQPELFIHIIPDK	3	-1.776	10	0.687	0.869	1.051	1.441	1.193	1.626	cytoplasm	GO:0006457 protein folding; GO:0006950 response to stress; GO:0050896 response to stimulus; GO:0009987 cellular process;		GO:0005524 ATP binding; GO:1901265 nucleoside phosphate binding; GO:0001882 nucleoside binding; GO:0043167 ion binding; GO:0005515 protein binding; GO:0000166 nucleotide binding; GO:0097159 organic cyclic compound binding; GO:1901363 heterocyclic compound binding; GO:0032549 ribonucleoside binding; GO:0097367 carbohydrate derivative binding; GO:0032553 ribonucleotide binding; GO:0005488 binding; …	K04079	HSP90A; molecular chaperone HtpG	mdm04626 Plant-pathogen interaction - Malus domestica (apple); mdm04141 Protein processing in endoplasmic reticulum - Malus domestica (apple);	IPR020568; IPR020575; IPR003594;	Ribosomal protein S5 domain 2-type fold; Heat shock protein Hsp90, N-terminal; Histidine kinase-like ATPase, C-terminal domain;
RchiOBHm_Chr5g0075541	45	2.105	Up	0.0057836	K	Putative Heat shock protein Hsp90 family	---	1	1.7e-17	160.62	ELISNASDALDK(1)IR	2	2.3757	10	0.687	0.683	0.979	1.895	1.486	1.564	cytoplasm	GO:0006457 protein folding; GO:0006950 response to stress; GO:0050896 response to stimulus; GO:0009987 cellular process;		GO:0005524 ATP binding; GO:1901265 nucleoside phosphate binding; GO:0001882 nucleoside binding; GO:0043167 ion binding; GO:0005515 protein binding; GO:0000166 nucleotide binding; GO:0097159 organic cyclic compound binding; GO:1901363 heterocyclic compound binding; GO:0032549 ribonucleoside binding; GO:0097367 carbohydrate derivative binding; GO:0032553 ribonucleotide binding; GO:0005488 binding; …	K04079	HSP90A; molecular chaperone HtpG	mdm04626 Plant-pathogen interaction - Malus domestica (apple); mdm04141 Protein processing in endoplasmic reticulum - Malus domestica (apple);	IPR020568; IPR020575; IPR003594;	Ribosomal protein S5 domain 2-type fold; Heat shock protein Hsp90, N-terminal; Histidine kinase-like ATPase, C-terminal domain;
RchiOBHm_Chr5g0078121	3	0.333	Down	0.0149183	K	"""Putative C2 domain, phosphoribosyltransferase"""	---	1	0.000658567	108.24	MQK(1)PPQSQDFALK	2	-0.58325	6	1.88	1.88	1.01	0.508	0.691	0.388	plasma membrane			GO:0005515 protein binding; GO:0005488 binding;				IPR013583; IPR000008;	Phosphoribosyltransferase C-terminal; C2 domain;
RchiOBHm_Chr5g0083931	25	2.004	Up	0.024305	K	Putative YTH domain-containing protein	---	1	9.42e-06	111.38	LSLDSQTK(1)TLEIPEPTK	3	-3.3506	6	0.727	0.94	0.55	1.221	1.364	1.857	nucleus			GO:0097159 organic cyclic compound binding; GO:1901363 heterocyclic compound binding; GO:0003723 RNA binding; GO:0005488 binding; GO:0003676 nucleic acid binding;				IPR007275;	YTH domain;
RchiOBHm_Chr6g0266851	136	1.683	Up	0.0051626	K	"""Putative V-type ATPase, V0 complex, 116kDa subunit family"""	---	1	6.19e-05	87.727	LVLQK(1)AGEFFHSAESSAR	3	-1.8265	5	0.689	0.705		1.055	1.199	1.266	cytoplasm	GO:0098655 cation transmembrane transport; GO:0034220 ion transmembrane transport; GO:0098660 inorganic ion transmembrane transport; GO:0090662 ATP hydrolysis coupled transmembrane transport; GO:0015988 energy coupled proton transmembrane transport, against electrochemical gradient; GO:0044699 single-organism process; GO:0006818 hydrogen transport; GO:0015992 proton transport; GO:0051234 establis…	GO:0043229 intracellular organelle; GO:0033179 proton-transporting V-type ATPase, V0 domain; GO:0016020 membrane; GO:0000220 vacuolar proton-transporting V-type ATPase, V0 domain; GO:0098588 bounding membrane of organelle; GO:0031090 organelle membrane; GO:0098796 membrane protein complex; GO:0005737 cytoplasm; GO:0044446 intracellular organelle part; GO:0032991 macromolecular complex; GO:0044424…	GO:0015075 ion transmembrane transporter activity; GO:0022892 substrate-specific transporter activity; GO:0015077 monovalent inorganic cation transmembrane transporter activity; GO:0022890 inorganic cation transmembrane transporter activity; GO:0015078 hydrogen ion transmembrane transporter activity; GO:0008324 cation transmembrane transporter activity; GO:0022891 substrate-specific transmembrane…	K02154	ATPeV0A; V-type H+-transporting ATPase subunit a	mdm04145 Phagosome - Malus domestica (apple); mdm00190 Oxidative phosphorylation - Malus domestica (apple); mdm01100 Metabolic pathways - Malus domestica (apple);
RchiOBHm_Chr6g0270971	175	2.106	Up	0.0185592	K	Putative golgi apparatus membrane protein TVP15	---	1	0.00330218	97.175	DQAIK(1)DLEELER	2	0.58527	5	0.68	0.567		1.042	1.418	1.48	plasma membrane
RchiOBHm_Chr6g0271831	182	2.388	Up	0.0044177	K	Putative potassium transporter	---	1	0.000526683	112.73	HAK(1)VSLLPNQLPSDAR	3	-1.097	6	0.848	0.513	0.641	1.579	1.737	1.465	plasma membrane	GO:0098655 cation transmembrane transport; GO:0034220 ion transmembrane transport; GO:0098660 inorganic ion transmembrane transport; GO:0030001 metal ion transport; GO:0071804 cellular potassium ion transport; GO:0044763 single-organism cellular process; GO:0044699 single-organism process; GO:0051234 establishment of localization; GO:0006810 transport; GO:0055085 transmembrane transport; GO:00068…	GO:0016020 membrane;	GO:0046873 metal ion transmembrane transporter activity; GO:0015075 ion transmembrane transporter activity; GO:0022892 substrate-specific transporter activity; GO:0015077 monovalent inorganic cation transmembrane transporter activity; GO:0022890 inorganic cation transmembrane transporter activity; GO:0008324 cation transmembrane transporter activity; GO:0022891 substrate-specific transmembrane tr…
RchiOBHm_Chr6g0274981	80	0.392	Down	0.0140961	K	Putative ABA/WDS induced protein	---	0.999381	3.22e-45	201.66	YTSETTGYVK(0.999)EGHGGK(0.001)	2	-1.0708	8	1.353	1.149	1.759	0.496		0.617	nucleus	GO:0006950 response to stress; GO:0050896 response to stimulus;
RchiOBHm_Chr6g0274981	133	1.622	Up	0.00143925	K	Putative ABA/WDS induced protein	---	0.841435	3.27e-17	223.26	HLEQLGELGAAAAGAYALHEK(0.841)HK(0.159)	4	-1.1883	11	0.81	0.765	0.68	1.287	1.228	1.143	nucleus	GO:0006950 response to stress; GO:0050896 response to stimulus;
RchiOBHm_Chr6g0280781	319	1.843	Up	0.010276	K	Putative protein patched/dispatched	---	1	2.18e-15	182.1	AGSTK(1)EPLLSAIDDDDINPVNLQK	3	0.057341	6	0.581	0.743	0.841	1.54	1.176	1.274	plasma membrane		GO:0031224 intrinsic component of membrane; GO:0016020 membrane; GO:0016021 integral component of membrane; GO:0044425 membrane part;	GO:0005319 lipid transporter activity; GO:0022892 substrate-specific transporter activity; GO:0005215 transporter activity;	K12385			IPR032190; IPR000731;	Niemann-Pick C1, N-terminal; Sterol-sensing domain;
RchiOBHm_Chr6g0281271	26	0.417	Down	0.041617	K	Putative hydroxymethylglutaryl-CoA reductase (NADPH)	---	0.995023	0.000601562	107.08	FVDDEETK(0.995)VVK(0.005)	2	-1.1083	4	1.953	1.396		0.65		0.747	cytoplasm	GO:0009116 nucleoside metabolic process; GO:0042278 purine nucleoside metabolic process; GO:0006725 cellular aromatic compound metabolic process; GO:0009259 ribonucleotide metabolic process; GO:0009117 nucleotide metabolic process; GO:0044699 single-organism process; GO:0009058 biosynthetic process; GO:0044255 cellular lipid metabolic process; GO:0044237 cellular metabolic process; GO:0006796 pho…	GO:0031224 intrinsic component of membrane; GO:0016020 membrane; GO:0016021 integral component of membrane; GO:0044425 membrane part;	GO:0016614 oxidoreductase activity, acting on CH-OH group of donors; GO:0097159 organic cyclic compound binding; GO:1901363 heterocyclic compound binding; GO:0016616 oxidoreductase activity, acting on the CH-OH group of donors, NAD or NADP as acceptor; GO:1901265 nucleoside phosphate binding; GO:0003824 catalytic activity; GO:0005488 binding; GO:0050661 NADP binding; GO:0000166 nucleotide binding…	K00021	HMGCR; hydroxymethylglutaryl-CoA reductase (NADPH) [EC:1.1.1.34]	mdm00900 Terpenoid backbone biosynthesis - Malus domestica (apple); mdm01110 Biosynthesis of secondary metabolites - Malus domestica (apple); mdm01100 Metabolic pathways - Malus domestica (apple);	IPR009029; IPR023074; IPR009023; IPR023282;	Hydroxymethylglutaryl-CoA reductase, class I/II, substrate-binding domain; Hydroxymethylglutaryl-CoA reductase, class I/II, catalytic domain; Hydroxymethylglutaryl-CoA reductase, class I/II, NAD/NADP-binding domain; Hydroxymethylglutaryl-CoA reductase, N-terminal;
RchiOBHm_Chr6g0281271	258	0.563	Down	0.04704	K	Putative hydroxymethylglutaryl-CoA reductase (NADPH)	---	1	1.19e-05	87.727	GCK(1)AINLSGGASSVLLK(1)DGMTR	3	1.7218	14	1.787	1.55	1.346	0.751	1.242	0.644	cytoplasm	GO:0009116 nucleoside metabolic process; GO:0042278 purine nucleoside metabolic process; GO:0006725 cellular aromatic compound metabolic process; GO:0009259 ribonucleotide metabolic process; GO:0009117 nucleotide metabolic process; GO:0044699 single-organism process; GO:0009058 biosynthetic process; GO:0044255 cellular lipid metabolic process; GO:0044237 cellular metabolic process; GO:0006796 pho…	GO:0031224 intrinsic component of membrane; GO:0016020 membrane; GO:0016021 integral component of membrane; GO:0044425 membrane part;	GO:0016614 oxidoreductase activity, acting on CH-OH group of donors; GO:0097159 organic cyclic compound binding; GO:1901363 heterocyclic compound binding; GO:0016616 oxidoreductase activity, acting on the CH-OH group of donors, NAD or NADP as acceptor; GO:1901265 nucleoside phosphate binding; GO:0003824 catalytic activity; GO:0005488 binding; GO:0050661 NADP binding; GO:0000166 nucleotide binding…	K00021	HMGCR; hydroxymethylglutaryl-CoA reductase (NADPH) [EC:1.1.1.34]	mdm00900 Terpenoid backbone biosynthesis - Malus domestica (apple); mdm01110 Biosynthesis of secondary metabolites - Malus domestica (apple); mdm01100 Metabolic pathways - Malus domestica (apple);	IPR009029; IPR023074; IPR009023; IPR023282;	Hydroxymethylglutaryl-CoA reductase, class I/II, substrate-binding domain; Hydroxymethylglutaryl-CoA reductase, class I/II, catalytic domain; Hydroxymethylglutaryl-CoA reductase, class I/II, NAD/NADP-binding domain; Hydroxymethylglutaryl-CoA reductase, N-terminal;
RchiOBHm_Chr6g0285071	142	1.518	Up	0.00082269	K	Putative Longin-like domain-containing protein	---	1	5.69e-45	227.47	AQVSEVK(1)GVMMENIEK	2	1.418	26	0.84	0.804	0.769	1.233	1.135	1.294	chloroplast	GO:0006810 transport; GO:0051179 localization; GO:0016192 vesicle-mediated transport; GO:0051234 establishment of localization;	GO:0031224 intrinsic component of membrane; GO:0016020 membrane; GO:0016021 integral component of membrane; GO:0044425 membrane part;		K08511			IPR010908; IPR011012; IPR001388;	Longin domain; Longin-like domain; Synaptobrevin;
RchiOBHm_Chr6g0287381	424	4.048	Up	0.0147422	K	Putative long-chain-alcohol oxidase	---	1	9.55e-10	241.56	IPLFGSPDYQSAMDAVCK(1)R	3	3.0417	10	0.335	0.47	0.769	3.144	1.387	1.841	plasma membrane	GO:0044699 single-organism process; GO:0008152 metabolic process; GO:0055114 oxidation-reduction process; GO:0044710 single-organism metabolic process;		GO:0046577 long-chain-alcohol oxidase activity; GO:1901265 nucleoside phosphate binding; GO:0050660 flavin adenine dinucleotide binding; GO:0043167 ion binding; GO:0000166 nucleotide binding; GO:0048037 cofactor binding; GO:0016491 oxidoreductase activity; GO:0016614 oxidoreductase activity, acting on CH-OH group of donors; GO:1901363 heterocyclic compound binding; GO:0097159 organic cyclic compo…	K17756			IPR000172; IPR007867; IPR023753;	Glucose-methanol-choline oxidoreductase, N-terminal; Glucose-methanol-choline oxidoreductase, C-terminal; FAD/NAD(P)-binding domain;
RchiOBHm_Chr6g0292101	464	1.762	Up	0.012976	K	"""Putative major facilitator, sugar transporter, major facilitator superfamily"""	---	1	2.37e-32	250.49	TLEQIQAAINK(1)	2	1.7876	6	0.874	0.728	0.576	1.165	1.241	1.432	plasma membrane	GO:0006810 transport; GO:0055085 transmembrane transport; GO:0051179 localization; GO:0051234 establishment of localization;	GO:0031224 intrinsic component of membrane; GO:0016020 membrane; GO:0016021 integral component of membrane; GO:0044425 membrane part;	GO:0022892 substrate-specific transporter activity; GO:0022891 substrate-specific transmembrane transporter activity; GO:0005215 transporter activity; GO:0022857 transmembrane transporter activity;	K08145			IPR020846;	Major facilitator superfamily domain;
RchiOBHm_Chr6g0292141	237	1.651	Up	0.031877	K	"""Putative major facilitator, sugar transporter, major facilitator superfamily"""	---	1	3.87e-12	184.65	GK(1)DADVSLEAAEIK	2	1.7959	6	0.679	0.957	0.706	1.164	1.586	1.117	plasma membrane	GO:0006810 transport; GO:0055085 transmembrane transport; GO:0051179 localization; GO:0051234 establishment of localization;	GO:0031224 intrinsic component of membrane; GO:0016020 membrane; GO:0016021 integral component of membrane; GO:0044425 membrane part;	GO:0022892 substrate-specific transporter activity; GO:0022891 substrate-specific transmembrane transporter activity; GO:0005215 transporter activity; GO:0022857 transmembrane transporter activity;	K08145			IPR020846;	Major facilitator superfamily domain;
RchiOBHm_Chr6g0292141	262	1.824	Up	0.031198	K	"""Putative major facilitator, sugar transporter, major facilitator superfamily"""	---	1	1.85e-07	170.85	EYIATIDSLPK(1)AK(1)LLDLFQR	3	0.93526	19	0.779	0.787	0.645	1.067	1.811	1.154	plasma membrane	GO:0006810 transport; GO:0055085 transmembrane transport; GO:0051179 localization; GO:0051234 establishment of localization;	GO:0031224 intrinsic component of membrane; GO:0016020 membrane; GO:0016021 integral component of membrane; GO:0044425 membrane part;	GO:0022892 substrate-specific transporter activity; GO:0022891 substrate-specific transmembrane transporter activity; GO:0005215 transporter activity; GO:0022857 transmembrane transporter activity;	K08145			IPR020846;	Major facilitator superfamily domain;
RchiOBHm_Chr6g0297531	116	1.906	Up	0.045415	K	"""Putative carbohydrate-binding-like, carboxypeptidase, regulatory domain-containing protein"""	---	1	0.00734211	60	NPGK(1)VQAALTENR	2	-0.36212	4	0.642	0.633			1.046	1.384	plasma membrane			GO:0030246 carbohydrate binding; GO:0005488 binding;	K23568			IPR014766; IPR013784; IPR019008;	Carboxypeptidase, regulatory domain; Carbohydrate-binding-like fold; Domain of unknown function DUF2012;
RchiOBHm_Chr6g0298081	155	0.663	Down	0.038896	K	Putative RNA helicase	---	0.836871	0.000317741	126.29	VAVFYGGVTIK(0.837)NHK(0.163)	2	0.97042	5	1.284		1.199	0.69	0.839	0.939	cytoplasm			GO:0005524 ATP binding; GO:1901265 nucleoside phosphate binding; GO:0001882 nucleoside binding; GO:0043167 ion binding; GO:0000166 nucleotide binding; GO:0097159 organic cyclic compound binding; GO:1901363 heterocyclic compound binding; GO:0032549 ribonucleoside binding; GO:0097367 carbohydrate derivative binding; GO:0032553 ribonucleotide binding; GO:0005488 binding; GO:0003676 nucleic acid bind…	K12812	UAP56; ATP-dependent RNA helicase UAP56/SUB2 [EC:3.6.4.13]	mdm03040 Spliceosome - Malus domestica (apple); mdm03015 mRNA surveillance pathway - Malus domestica (apple); mdm03013 RNA transport - Malus domestica (apple);	IPR014014; IPR011545; IPR027417; IPR014001; IPR001650;	RNA helicase, DEAD-box type, Q motif; DEAD/DEAH box helicase domain; P-loop containing nucleoside triphosphate hydrolase; Helicase superfamily 1/2, ATP-binding domain; Helicase, C-terminal;
RchiOBHm_Chr6g0298081	216	2.323	Up	0.035558	K	Putative RNA helicase	---	0.999972	0.00188503	82.437	DVQEIFK(1)MTPHDK	2	0.89509	5	0.654	0.477	0.79		1.223	1.752	cytoplasm			GO:0005524 ATP binding; GO:1901265 nucleoside phosphate binding; GO:0001882 nucleoside binding; GO:0043167 ion binding; GO:0000166 nucleotide binding; GO:0097159 organic cyclic compound binding; GO:1901363 heterocyclic compound binding; GO:0032549 ribonucleoside binding; GO:0097367 carbohydrate derivative binding; GO:0032553 ribonucleotide binding; GO:0005488 binding; GO:0003676 nucleic acid bind…	K12812	UAP56; ATP-dependent RNA helicase UAP56/SUB2 [EC:3.6.4.13]	mdm03040 Spliceosome - Malus domestica (apple); mdm03015 mRNA surveillance pathway - Malus domestica (apple); mdm03013 RNA transport - Malus domestica (apple);	IPR014014; IPR011545; IPR027417; IPR014001; IPR001650;	RNA helicase, DEAD-box type, Q motif; DEAD/DEAH box helicase domain; P-loop containing nucleoside triphosphate hydrolase; Helicase superfamily 1/2, ATP-binding domain; Helicase, C-terminal;
RchiOBHm_Chr6g0298221	434	1.956	Up	0.0033032	K	Putative cellulose synthase (UDP-forming) chromatin regulator PHD family	---	1	0.00275897	111.39	DK(1)IQPSFVK	2	-1.7459	6	0.815	0.827	0.765	1.431	1.373	1.903	plasma membrane	GO:0016051 carbohydrate biosynthetic process; GO:0044711 single-organism biosynthetic process; GO:0006073 cellular glucan metabolic process; GO:0000271 polysaccharide biosynthetic process; GO:0030243 cellulose metabolic process; GO:0044042 glucan metabolic process; GO:0044763 single-organism cellular process; GO:0044699 single-organism process; GO:0033692 cellular polysaccharide biosynthetic proc…	GO:0016020 membrane;	GO:0016759 cellulose synthase activity; GO:0016758 transferase activity, transferring hexosyl groups; GO:0043167 ion binding; GO:0008194 UDP-glycosyltransferase activity; GO:0046527 glucosyltransferase activity; GO:0005515 protein binding; GO:0008270 zinc ion binding; GO:0046914 transition metal ion binding; GO:0003824 catalytic activity; GO:0005488 binding; GO:0035251 UDP-glucosyltransferase act…	K10999			IPR027934; IPR001841; IPR013083; IPR029044;	Cellulose synthase, RING-type zinc finger; Zinc finger, RING-type; Zinc finger, RING/FYVE/PHD-type; Nucleotide-diphospho-sugar transferases;
RchiOBHm_Chr6g0298221	441	1.518	Up	0.039658	K	Putative cellulose synthase (UDP-forming) chromatin regulator PHD family	---	1	0.00179961	98.009	IQPSFVK(1)ER	2	0.2798	4	0.966		0.831	1.421		1.307	plasma membrane	GO:0016051 carbohydrate biosynthetic process; GO:0044711 single-organism biosynthetic process; GO:0006073 cellular glucan metabolic process; GO:0000271 polysaccharide biosynthetic process; GO:0030243 cellulose metabolic process; GO:0044042 glucan metabolic process; GO:0044763 single-organism cellular process; GO:0044699 single-organism process; GO:0033692 cellular polysaccharide biosynthetic proc…	GO:0016020 membrane;	GO:0016759 cellulose synthase activity; GO:0016758 transferase activity, transferring hexosyl groups; GO:0043167 ion binding; GO:0008194 UDP-glycosyltransferase activity; GO:0046527 glucosyltransferase activity; GO:0005515 protein binding; GO:0008270 zinc ion binding; GO:0046914 transition metal ion binding; GO:0003824 catalytic activity; GO:0005488 binding; GO:0035251 UDP-glucosyltransferase act…	K10999			IPR027934; IPR001841; IPR013083; IPR029044;	Cellulose synthase, RING-type zinc finger; Zinc finger, RING-type; Zinc finger, RING/FYVE/PHD-type; Nucleotide-diphospho-sugar transferases;
RchiOBHm_Chr6g0298651	102	0.52	Down	0.034219	K	Putative enoyl-CoA hydratase	---	1	0.000454868	123.5	LTYK(1)NVPTWHR	3	-4.2344	8	1.491	1.032	1.339	0.451	0.762	0.797	chloroplast	GO:0050794 regulation of cellular process; GO:0044700 single organism signaling; GO:0051716 cellular response to stimulus; GO:0046907 intracellular transport; GO:0035556 intracellular signal transduction; GO:0044699 single-organism process; GO:0051169 nuclear transport; GO:0071702 organic substance transport; GO:0007264 small GTPase mediated signal transduction; GO:0023052 signaling; GO:0050896 r…		GO:1901265 nucleoside phosphate binding; GO:0001882 nucleoside binding; GO:0043167 ion binding; GO:0016817 hydrolase activity, acting on acid anhydrides; GO:0016787 hydrolase activity; GO:0000166 nucleotide binding; GO:0017111 nucleoside-triphosphatase activity; GO:0097159 organic cyclic compound binding; GO:1901363 heterocyclic compound binding; GO:0032549 ribonucleoside binding; GO:0097367 carb…	K07936	RAN; GTP-binding nuclear protein Ran	mdm03008 Ribosome biogenesis in eukaryotes - Malus domestica (apple); mdm03013 RNA transport - Malus domestica (apple);	IPR005225; IPR027417;	Small GTP-binding protein domain; P-loop containing nucleoside triphosphate hydrolase;
RchiOBHm_Chr6g0298661	307	0.241	Down	3.6872e-05	K	Putative Galactose-binding domain-containing protein	---	1	4.45e-18	168.69	YIDSDHFSVPEGK(1)R	3	0.11023	17	1.934	1.778	1.924	0.484	0.396	0.476	chloroplast							IPR006946; IPR008979;	Domain of unknown function DUF642; Galactose-binding domain-like;
RchiOBHm_Chr6g0298661	316	0.391	Down	0.00065849	K	Putative Galactose-binding domain-containing protein	---	1	4.05e-25	181.9	AVELVAGK(1)ESAIAQVVR	2	1.5664	11	1.731	1.358	1.729	0.602	0.586	0.698	chloroplast							IPR006946; IPR008979;	Domain of unknown function DUF642; Galactose-binding domain-like;
RchiOBHm_Chr6g0301281	191	1.591	Up	0.036681	K	Putative eugenol synthase	---	1	0.00031775	112.95	AIFNK(1)EDDIGTYTIR	2	2.3438	6	0.771	0.631		1.288	0.976	1.082	cytoplasm				K23050			IPR016040; IPR008030;	NAD(P)-binding domain; NmrA-like domain;
RchiOBHm_Chr6g0302451	94	1.706	Up	0.033878	K	"""Putative IQ motif, EF-hand binding protein"""	---	1	7.77e-11	138.33	VSVIQCTDEK(1)PQLVTPENPK	3	1.7528	6	1.064	0.745	0.631	1.18	1.551	1.432	nucleus			GO:0005515 protein binding; GO:0005488 binding;				IPR025064;	Domain of unknown function DUF4005;
RchiOBHm_Chr6g0304901	902	1.556	Up	0.026698	K	Putative proton-exporting ATPase	---	1	2.18e-12	142.73	TLHGLQPPESSNIFSDK(1)SSYR	3	1.4579	10	0.94	0.739	0.634	1.351	1.082	1.167	plasma membrane	GO:0009116 nucleoside metabolic process; GO:0042278 purine nucleoside metabolic process; GO:0009167 purine ribonucleoside monophosphate metabolic process; GO:0009117 nucleotide metabolic process; GO:0044699 single-organism process; GO:0046129 purine ribonucleoside biosynthetic process; GO:0009163 nucleoside biosynthetic process; GO:0009058 biosynthetic process; GO:0009156 ribonucleoside monophosp…	GO:0031224 intrinsic component of membrane; GO:0016020 membrane; GO:0016021 integral component of membrane; GO:0044425 membrane part;	GO:1901265 nucleoside phosphate binding; GO:0043167 ion binding; GO:0016817 hydrolase activity, acting on acid anhydrides; GO:0016787 hydrolase activity; GO:0000166 nucleotide binding; GO:0017111 nucleoside-triphosphatase activity; GO:0016887 ATPase activity; GO:1901363 heterocyclic compound binding; GO:0097159 organic cyclic compound binding; GO:0016462 pyrophosphatase activity; GO:0003824 catal…	K01535	PMA1; H+-transporting ATPase [EC:7.1.2.1]	mdm00190 Oxidative phosphorylation - Malus domestica (apple); mdm01100 Metabolic pathways - Malus domestica (apple);	IPR023298; IPR004014; IPR023299; IPR008250; IPR023214;	P-type ATPase, transmembrane domain; Cation-transporting P-type ATPase, N-terminal; P-type ATPase, cytoplasmic domain N; P-type ATPase, A domain; HAD-like domain;
RchiOBHm_Chr6g0304901	931	1.523	Up	0.0147035	K	Putative proton-exporting ATPase	---	1	6.27e-08	156.73	ELTTLK(1)GHVESVVK	2	1.1312	10	0.741	0.741	0.873	1.401	1.128	1.057	plasma membrane	GO:0009116 nucleoside metabolic process; GO:0042278 purine nucleoside metabolic process; GO:0009167 purine ribonucleoside monophosphate metabolic process; GO:0009117 nucleotide metabolic process; GO:0044699 single-organism process; GO:0046129 purine ribonucleoside biosynthetic process; GO:0009163 nucleoside biosynthetic process; GO:0009058 biosynthetic process; GO:0009156 ribonucleoside monophosp…	GO:0031224 intrinsic component of membrane; GO:0016020 membrane; GO:0016021 integral component of membrane; GO:0044425 membrane part;	GO:1901265 nucleoside phosphate binding; GO:0043167 ion binding; GO:0016817 hydrolase activity, acting on acid anhydrides; GO:0016787 hydrolase activity; GO:0000166 nucleotide binding; GO:0017111 nucleoside-triphosphatase activity; GO:0016887 ATPase activity; GO:1901363 heterocyclic compound binding; GO:0097159 organic cyclic compound binding; GO:0016462 pyrophosphatase activity; GO:0003824 catal…	K01535	PMA1; H+-transporting ATPase [EC:7.1.2.1]	mdm00190 Oxidative phosphorylation - Malus domestica (apple); mdm01100 Metabolic pathways - Malus domestica (apple);	IPR023298; IPR004014; IPR023299; IPR008250; IPR023214;	P-type ATPase, transmembrane domain; Cation-transporting P-type ATPase, N-terminal; P-type ATPase, cytoplasmic domain N; P-type ATPase, A domain; HAD-like domain;
RchiOBHm_Chr6g0304901	317	0.611	Down	0.029682	K	Putative proton-exporting ATPase	---	1	0.00016214	126.82	LSQQGAITK(1)R	2	-0.66986	5		1.304	1.327	0.825	0.927	0.661	plasma membrane	GO:0009116 nucleoside metabolic process; GO:0042278 purine nucleoside metabolic process; GO:0009167 purine ribonucleoside monophosphate metabolic process; GO:0009117 nucleotide metabolic process; GO:0044699 single-organism process; GO:0046129 purine ribonucleoside biosynthetic process; GO:0009163 nucleoside biosynthetic process; GO:0009058 biosynthetic process; GO:0009156 ribonucleoside monophosp…	GO:0031224 intrinsic component of membrane; GO:0016020 membrane; GO:0016021 integral component of membrane; GO:0044425 membrane part;	GO:1901265 nucleoside phosphate binding; GO:0043167 ion binding; GO:0016817 hydrolase activity, acting on acid anhydrides; GO:0016787 hydrolase activity; GO:0000166 nucleotide binding; GO:0017111 nucleoside-triphosphatase activity; GO:0016887 ATPase activity; GO:1901363 heterocyclic compound binding; GO:0097159 organic cyclic compound binding; GO:0016462 pyrophosphatase activity; GO:0003824 catal…	K01535	PMA1; H+-transporting ATPase [EC:7.1.2.1]	mdm00190 Oxidative phosphorylation - Malus domestica (apple); mdm01100 Metabolic pathways - Malus domestica (apple);	IPR023298; IPR004014; IPR023299; IPR008250; IPR023214;	P-type ATPase, transmembrane domain; Cation-transporting P-type ATPase, N-terminal; P-type ATPase, cytoplasmic domain N; P-type ATPase, A domain; HAD-like domain;
RchiOBHm_Chr6g0304901	5	1.565	Up	0.0084756	K	Putative proton-exporting ATPase	---	1	1.65e-49	277.18	SGAK(1)AISLEEIK(1)NESVDLER	3	1.399	15	0.704	0.781	0.825	1.379	1.048	1.189	plasma membrane	GO:0009116 nucleoside metabolic process; GO:0042278 purine nucleoside metabolic process; GO:0009167 purine ribonucleoside monophosphate metabolic process; GO:0009117 nucleotide metabolic process; GO:0044699 single-organism process; GO:0046129 purine ribonucleoside biosynthetic process; GO:0009163 nucleoside biosynthetic process; GO:0009058 biosynthetic process; GO:0009156 ribonucleoside monophosp…	GO:0031224 intrinsic component of membrane; GO:0016020 membrane; GO:0016021 integral component of membrane; GO:0044425 membrane part;	GO:1901265 nucleoside phosphate binding; GO:0043167 ion binding; GO:0016817 hydrolase activity, acting on acid anhydrides; GO:0016787 hydrolase activity; GO:0000166 nucleotide binding; GO:0017111 nucleoside-triphosphatase activity; GO:0016887 ATPase activity; GO:1901363 heterocyclic compound binding; GO:0097159 organic cyclic compound binding; GO:0016462 pyrophosphatase activity; GO:0003824 catal…	K01535	PMA1; H+-transporting ATPase [EC:7.1.2.1]	mdm00190 Oxidative phosphorylation - Malus domestica (apple); mdm01100 Metabolic pathways - Malus domestica (apple);	IPR023298; IPR004014; IPR023299; IPR008250; IPR023214;	P-type ATPase, transmembrane domain; Cation-transporting P-type ATPase, N-terminal; P-type ATPase, cytoplasmic domain N; P-type ATPase, A domain; HAD-like domain;
RchiOBHm_Chr6g0311161	76	0.504	Down	0.028281	K	Putative thromboxane-A synthase	---	1	1.59e-06	110.44	HGPDVFSVLAK(1)QYGPIFR	3	0.56226	5	1.305	1.138	1.552	0.786	0.555		cytoplasm	GO:0044699 single-organism process; GO:0008152 metabolic process; GO:0055114 oxidation-reduction process; GO:0044710 single-organism metabolic process;		GO:0097159 organic cyclic compound binding; GO:1901363 heterocyclic compound binding; GO:0020037 heme binding; GO:0005506 iron ion binding; GO:0046914 transition metal ion binding; GO:0003824 catalytic activity; GO:0005488 binding; GO:0043167 ion binding; GO:0043169 cation binding; GO:0046872 metal ion binding; GO:0016705 oxidoreductase activity, acting on paired donors, with incorporation or red…	K20771
RchiOBHm_Chr6g0312681	150	0.544	Down	0.0076636	K	"""Putative syntaxin-5, Sly1p-binding domain-containing protein"""	---	1	4.65e-22	167.64	NESGNISSDTTSHSTTVVDDLK(1)NR	3	1.3483	5	1.484	1.274		0.666	0.781	0.805	Golgi apparatus	GO:0045184 establishment of protein localization; GO:0006810 transport; GO:0046907 intracellular transport; GO:0070727 cellular macromolecule localization; GO:0051649 establishment of localization in cell; GO:0016192 vesicle-mediated transport; GO:0006886 intracellular protein transport; GO:0071702 organic substance transport; GO:0008104 protein localization; GO:0033036 macromolecule localization…	GO:0016020 membrane;	GO:0005484 SNAP receptor activity; GO:0005515 protein binding; GO:0005488 binding;	K08490	STX5; syntaxin 5	mdm04130 SNARE interactions in vesicular transport - Malus domestica (apple);	IPR000727; IPR010989; IPR021538;	Target SNARE coiled-coil homology domain; SNARE; Syntaxin-5, N-terminal, Sly1p-binding domain;
RchiOBHm_Chr7g0177061	18	2.544	Up	0.0071041	K	"""Putative oligopeptide transporter, OPT superfamily"""	---	1	4.78e-26	191.95	SQEYQKPEQVDEDPNQK(1)R	3	-0.12119	5	0.79	0.64	0.587		1.904	1.517	plasma membrane	GO:0006810 transport; GO:0055085 transmembrane transport; GO:0051179 localization; GO:0051234 establishment of localization;
RchiOBHm_Chr7g0177601	270	2.481	Up	0.037078	K	Putative glutamate decarboxylase	---	1	0.000717508	90.306	LPLVK(1)SINVSGHK	3	-5.6965	8	0.435	0.565		0.952	1.075	1.695	cytoplasm	GO:0009064 glutamine family amino acid metabolic process; GO:0043648 dicarboxylic acid metabolic process; GO:0044281 small molecule metabolic process; GO:0044763 single-organism cellular process; GO:0006807 nitrogen compound metabolic process; GO:0044699 single-organism process; GO:0044238 primary metabolic process; GO:1901605 alpha-amino acid metabolic process; GO:0044237 cellular metabolic proc…		GO:0097159 organic cyclic compound binding; GO:1901363 heterocyclic compound binding; GO:0004351 glutamate decarboxylase activity; GO:0003824 catalytic activity; GO:0005488 binding; GO:0016830 carbon-carbon lyase activity; GO:0043167 ion binding; GO:0016831 carboxy-lyase activity; GO:0016829 lyase activity; GO:0043168 anion binding; GO:0048037 cofactor binding; GO:0030170 pyridoxal phosphate bind…	K01580	E4.1.1.15; glutamate decarboxylase [EC:4.1.1.15]	mdm04136 Autophagy - other - Malus domestica (apple); mdm00410 beta-Alanine metabolism - Malus domestica (apple); mdm00430 Taurine and hypotaurine metabolism - Malus domestica (apple); mdm00650 Butanoate metabolism - Malus domestica (apple); mdm01110 Biosynthesis of secondary metabolites - Malus domestica (apple); mdm01100 Metabolic pathways - Malus domestica (apple);	IPR015424; IPR015421; IPR015422;	Pyridoxal phosphate-dependent transferase; Pyridoxal phosphate-dependent transferase, major region, subdomain 1; Pyridoxal phosphate-dependent transferase, major region, subdomain 2;
RchiOBHm_Chr7g0180411	391	1.608	Up	0.0086602	K	Putative proton-exporting ATPase	---	1	4.62e-10	151.55	MENQDAIDTAIVGMLADPK(1)EAR	3	2.458	14	0.839	0.83	0.712	1.449	1.09	1.29	plasma membrane	GO:0009116 nucleoside metabolic process; GO:0042278 purine nucleoside metabolic process; GO:0009167 purine ribonucleoside monophosphate metabolic process; GO:0009117 nucleotide metabolic process; GO:0044699 single-organism process; GO:0046129 purine ribonucleoside biosynthetic process; GO:0009163 nucleoside biosynthetic process; GO:0009058 biosynthetic process; GO:0009156 ribonucleoside monophosp…	GO:0031224 intrinsic component of membrane; GO:0016020 membrane; GO:0016021 integral component of membrane; GO:0044425 membrane part;	GO:1901265 nucleoside phosphate binding; GO:0043167 ion binding; GO:0016817 hydrolase activity, acting on acid anhydrides; GO:0016787 hydrolase activity; GO:0000166 nucleotide binding; GO:0017111 nucleoside-triphosphatase activity; GO:0016887 ATPase activity; GO:1901363 heterocyclic compound binding; GO:0097159 organic cyclic compound binding; GO:0016462 pyrophosphatase activity; GO:0003824 catal…	K01535	PMA1; H+-transporting ATPase [EC:7.1.2.1]	mdm00190 Oxidative phosphorylation - Malus domestica (apple); mdm01100 Metabolic pathways - Malus domestica (apple);	IPR023298; IPR004014; IPR023299; IPR008250; IPR023214;	P-type ATPase, transmembrane domain; Cation-transporting P-type ATPase, N-terminal; P-type ATPase, cytoplasmic domain N; P-type ATPase, A domain; HAD-like domain;
RchiOBHm_Chr7g0180411	944	1.777	Up	0.0022174	K	Putative proton-exporting ATPase	---	1	1.13e-11	150.44	LK(1)GLDIDTIQQAYTV	2	1.5144	6	0.706	0.836	0.713	1.501	1.228	1.278	plasma membrane	GO:0009116 nucleoside metabolic process; GO:0042278 purine nucleoside metabolic process; GO:0009167 purine ribonucleoside monophosphate metabolic process; GO:0009117 nucleotide metabolic process; GO:0044699 single-organism process; GO:0046129 purine ribonucleoside biosynthetic process; GO:0009163 nucleoside biosynthetic process; GO:0009058 biosynthetic process; GO:0009156 ribonucleoside monophosp…	GO:0031224 intrinsic component of membrane; GO:0016020 membrane; GO:0016021 integral component of membrane; GO:0044425 membrane part;	GO:1901265 nucleoside phosphate binding; GO:0043167 ion binding; GO:0016817 hydrolase activity, acting on acid anhydrides; GO:0016787 hydrolase activity; GO:0000166 nucleotide binding; GO:0017111 nucleoside-triphosphatase activity; GO:0016887 ATPase activity; GO:1901363 heterocyclic compound binding; GO:0097159 organic cyclic compound binding; GO:0016462 pyrophosphatase activity; GO:0003824 catal…	K01535	PMA1; H+-transporting ATPase [EC:7.1.2.1]	mdm00190 Oxidative phosphorylation - Malus domestica (apple); mdm01100 Metabolic pathways - Malus domestica (apple);	IPR023298; IPR004014; IPR023299; IPR008250; IPR023214;	P-type ATPase, transmembrane domain; Cation-transporting P-type ATPase, N-terminal; P-type ATPase, cytoplasmic domain N; P-type ATPase, A domain; HAD-like domain;
RchiOBHm_Chr7g0180601	121	1.927	Up	0.040104	K	Putative Band 7 domain-containing protein	---	0.999983	0.000233676	128.41	LLLDDAFEQK(1)NEIAK	2	-1.0079	6	0.676	0.627		1.416		1.095	cytoplasm							IPR001107;	Band 7 domain;
RchiOBHm_Chr7g0183461	84	1.808	Up	0.00039663	K	Putative UDP-arabinopyranose mutase	---	1	3.65e-07	155.57	ILGPK(1)AACISFK(1)DSACR	3	0.74968	8	0.707	0.691	0.741	1.262	1.193	1.413	cytoplasm	GO:0016051 carbohydrate biosynthetic process; GO:0044711 single-organism biosynthetic process; GO:0006073 cellular glucan metabolic process; GO:0000271 polysaccharide biosynthetic process; GO:0030243 cellulose metabolic process; GO:0044042 glucan metabolic process; GO:0044763 single-organism cellular process; GO:0044699 single-organism process; GO:0033692 cellular polysaccharide biosynthetic proc…		GO:0016853 isomerase activity; GO:0016866 intramolecular transferase activity; GO:0003824 catalytic activity;	K13379	RGP; reversibly glycosylated polypeptide / UDP-arabinopyranose mutase [EC:2.4.1.- 5.4.99.30]	mdm00520 Amino sugar and nucleotide sugar metabolism - Malus domestica (apple); mdm01100 Metabolic pathways - Malus domestica (apple);	IPR029044;	Nucleotide-diphospho-sugar transferases;
RchiOBHm_Chr7g0195681	105	0.485	Down	0.0152999	K	Putative H(+)-transporting two-sector ATPase	---	1	9.23e-12	171.09	ELLNVSK(1)DHHGYAK	2	0.57657	14	1.064	1.385	1.595	0.492	0.748	0.721	cytoplasm	GO:0098655 cation transmembrane transport; GO:0034220 ion transmembrane transport; GO:0098660 inorganic ion transmembrane transport; GO:0090662 ATP hydrolysis coupled transmembrane transport; GO:0015988 energy coupled proton transmembrane transport, against electrochemical gradient; GO:0044699 single-organism process; GO:0006818 hydrogen transport; GO:0015992 proton transport; GO:0051234 establis…	GO:0032991 macromolecular complex; GO:0016020 membrane; GO:0033178 proton-transporting two-sector ATPase complex, catalytic domain; GO:0043234 protein complex; GO:0098796 membrane protein complex; GO:0044425 membrane part; GO:0016469 proton-transporting two-sector ATPase complex;	GO:0022804 active transmembrane transporter activity; GO:0042625 ATPase coupled ion transmembrane transporter activity; GO:0015075 ion transmembrane transporter activity; GO:0022853 active ion transmembrane transporter activity; GO:0015399 primary active transmembrane transporter activity; GO:0022892 substrate-specific transporter activity; GO:0044769 ATPase activity, coupled to transmembrane mov…	K02150	ATPeV1E; V-type H+-transporting ATPase subunit E	mdm04145 Phagosome - Malus domestica (apple); mdm00190 Oxidative phosphorylation - Malus domestica (apple); mdm01100 Metabolic pathways - Malus domestica (apple);
RchiOBHm_Chr7g0195681	115	2.757	Up	0.028357	K	Putative H(+)-transporting two-sector ATPase	---	1	1.79e-05	142.71	LLK(1)DLIIQSLLR	2	-0.45402	6	0.507	0.59	0.639	2.069		1.122	cytoplasm	GO:0098655 cation transmembrane transport; GO:0034220 ion transmembrane transport; GO:0098660 inorganic ion transmembrane transport; GO:0090662 ATP hydrolysis coupled transmembrane transport; GO:0015988 energy coupled proton transmembrane transport, against electrochemical gradient; GO:0044699 single-organism process; GO:0006818 hydrogen transport; GO:0015992 proton transport; GO:0051234 establis…	GO:0032991 macromolecular complex; GO:0016020 membrane; GO:0033178 proton-transporting two-sector ATPase complex, catalytic domain; GO:0043234 protein complex; GO:0098796 membrane protein complex; GO:0044425 membrane part; GO:0016469 proton-transporting two-sector ATPase complex;	GO:0022804 active transmembrane transporter activity; GO:0042625 ATPase coupled ion transmembrane transporter activity; GO:0015075 ion transmembrane transporter activity; GO:0022853 active ion transmembrane transporter activity; GO:0015399 primary active transmembrane transporter activity; GO:0022892 substrate-specific transporter activity; GO:0044769 ATPase activity, coupled to transmembrane mov…	K02150	ATPeV1E; V-type H+-transporting ATPase subunit E	mdm04145 Phagosome - Malus domestica (apple); mdm00190 Oxidative phosphorylation - Malus domestica (apple); mdm01100 Metabolic pathways - Malus domestica (apple);
RchiOBHm_Chr7g0195711	284	1.641	Up	0.0192614	K	Putative xenobiotic-transporting ATPase	---	0.999999	2.69e-07	148.9	TLYLMFK(1)EEVQK	2	-0.98312	8	0.743	0.833	0.725	0.982	1.461	1.333	plasma membrane	GO:0006810 transport; GO:0055085 transmembrane transport; GO:0051179 localization; GO:0051234 establishment of localization;	GO:0031224 intrinsic component of membrane; GO:0016020 membrane; GO:0016021 integral component of membrane; GO:0044425 membrane part;	GO:1901265 nucleoside phosphate binding; GO:0015399 primary active transmembrane transporter activity; GO:0016817 hydrolase activity, acting on acid anhydrides; GO:0016787 hydrolase activity; GO:0016887 ATPase activity; GO:0097159 organic cyclic compound binding; GO:1901363 heterocyclic compound binding; GO:0016462 pyrophosphatase activity; GO:0003824 catalytic activity; GO:0032553 ribonucleotide…				IPR003593; IPR003439; IPR027417; IPR011527;	AAA+ ATPase domain; ABC transporter-like; P-loop containing nucleoside triphosphate hydrolase; ABC transporter type 1, transmembrane domain;
RchiOBHm_Chr7g0196251	31	1.7	Up	0.019301	K	"""Putative Late embryogenesis abundant protein, LEA-14"""	---	1	2.67e-44	228.13	SDGESLSEDELK(1)R	2	0.93764	5	0.514		0.687	1.014	1.087	0.962	chloroplast							IPR004864;	Late embryogenesis abundant protein, LEA-14;
RchiOBHm_Chr7g0196731	13	2.16	Up	0.0107395	K	Putative plectin/S10	---	1	1.28e-07	152.23	EISK(1)YLFQEGVCYAK	2	-0.86001	6	0.536	0.617	0.741	1.749	1.094	1.248	nucleus				K02947	RP-S10e; small subunit ribosomal protein S10e	mdm03010 Ribosome - Malus domestica (apple);	IPR005326;	Plectin/S10, N-terminal;
RchiOBHm_Chr7g0197831	67	1.73	Up	0.0152953	K	"""Putative transferase, protein kinase RLK-Pelle-RLCK-XII-1 family"""	---	0.999956	2.03e-27	184.31	TATSGFAVENIVSEHGEK(1)APNVVYK	3	1.3022	14	0.711	0.833	0.783	1.439	1.037	1.55	cytoplasm	GO:0016310 phosphorylation; GO:0044267 cellular protein metabolic process; GO:0044238 primary metabolic process; GO:0044237 cellular metabolic process; GO:0006796 phosphate-containing compound metabolic process; GO:0071704 organic substance metabolic process; GO:0008152 metabolic process; GO:0006468 protein phosphorylation; GO:0006793 phosphorus metabolic process; GO:0044260 cellular macromolecul…		GO:0005524 ATP binding; GO:1901265 nucleoside phosphate binding; GO:0016773 phosphotransferase activity, alcohol group as acceptor; GO:0001882 nucleoside binding; GO:0043167 ion binding; GO:0005515 protein binding; GO:0004672 protein kinase activity; GO:0000166 nucleotide binding; GO:0097159 organic cyclic compound binding; GO:1901363 heterocyclic compound binding; GO:0032549 ribonucleoside bindi…	K14500	BSK; BR-signaling kinase [EC:2.7.11.1]	mdm04075 Plant hormone signal transduction - Malus domestica (apple);	IPR000719; IPR011990; IPR001245; IPR011009;	Protein kinase domain; Tetratricopeptide-like helical domain; Serine-threonine/tyrosine-protein kinase catalytic domain; Protein kinase-like domain;
RchiOBHm_Chr7g0198001	78	0.65	Down	0.027359	K	Putative phospholipid-hydroperoxide glutathione peroxidase	---	1	0.000705372	90.689	DAK(1)GNDVDLSSYK	2	-1.7981	6	1.264	1.314	1.022	0.842	0.867	0.631	chloroplast	GO:0008152 metabolic process; GO:0006950 response to stress; GO:0055114 oxidation-reduction process; GO:0044710 single-organism metabolic process; GO:0006979 response to oxidative stress; GO:0044699 single-organism process; GO:0050896 response to stimulus;		GO:0016209 antioxidant activity; GO:0004601 peroxidase activity; GO:0004602 glutathione peroxidase activity; GO:0003824 catalytic activity; GO:0016491 oxidoreductase activity; GO:0016684 oxidoreductase activity, acting on peroxide as acceptor;	K00432	gpx; glutathione peroxidase [EC:1.11.1.9]	mdm00480 Glutathione metabolism - Malus domestica (apple); mdm00590 Arachidonic acid metabolism - Malus domestica (apple); mdm01100 Metabolic pathways - Malus domestica (apple);	IPR012336;	Thioredoxin-like fold;
RchiOBHm_Chr7g0198901	56	0.486	Down	0.037877	K	Putative isomerase	---	0.999883	0.0139736	81.163	DLVGPK(1)LSQK	2	-1.976	4	1.284		1.705	0.716	0.737		cytoskeleton	GO:0044723 single-organism carbohydrate metabolic process; GO:0008152 metabolic process; GO:0044710 single-organism metabolic process; GO:0044281 small molecule metabolic process; GO:0005996 monosaccharide metabolic process; GO:0044699 single-organism process; GO:0044238 primary metabolic process; GO:0005975 carbohydrate metabolic process; GO:0006012 galactose metabolic process; GO:0019318 hexose…		GO:0016853 isomerase activity; GO:0003824 catalytic activity; GO:0016854 racemase and epimerase activity; GO:0016857 racemase and epimerase activity, acting on carbohydrates and derivatives; GO:0003978 UDP-glucose 4-epimerase activity;	K01784	galE; UDP-glucose 4-epimerase [EC:5.1.3.2]	mdm00520 Amino sugar and nucleotide sugar metabolism - Malus domestica (apple); mdm00052 Galactose metabolism - Malus domestica (apple); mdm01100 Metabolic pathways - Malus domestica (apple);	IPR016040;	NAD(P)-binding domain;
RchiOBHm_Chr7g0199641	275	1.775	Up	0.0079551	K	"""Putative dTDP-4-dehydrorhamnose reductase, dTDP-4-dehydrorhamnose 3,5-epimerase"""	---	1	3.15e-05	148.9	K(1)EFPELLSIK	2	-0.99	12	0.89	0.696	0.655	1.15	1.371	1.457	cytoskeleton				K12451	UER1; 3,5-epimerase/4-reductase [EC:5.1.3.- 1.1.1.-]"	mdm00520 Amino sugar and nucleotide sugar metabolism - Malus domestica (apple); mdm01100 Metabolic pathways - Malus domestica (apple);	IPR029903; IPR016040;	RmlD-like substrate binding domain; NAD(P)-binding domain;
RchiOBHm_Chr7g0199641	297	0.21	Down	0.038045	K	"""Putative dTDP-4-dehydrorhamnose reductase, dTDP-4-dehydrorhamnose 3,5-epimerase"""	---	1	0.000316685	154.35	NVFKPNQK(1)TA	2	-0.64823	5	2.526	1.149		0.522	0.226	0.408	cytoskeleton				K12451	UER1; 3,5-epimerase/4-reductase [EC:5.1.3.- 1.1.1.-]"	mdm00520 Amino sugar and nucleotide sugar metabolism - Malus domestica (apple); mdm01100 Metabolic pathways - Malus domestica (apple);	IPR029903; IPR016040;	RmlD-like substrate binding domain; NAD(P)-binding domain;
RchiOBHm_Chr7g0207821	4335	1.92	Up	0.032437	K	Putative vacuolar protein sorting-associated protein	---	1	1.71e-05	149.58	ILDDPQPLLQSLK(1)EH	3	-1.2684	9	0.487	0.915	0.797	1.366	1.211	1.645	plasma membrane				K19525			IPR031642; IPR011993; IPR009543; IPR031646; IPR026854; IPR010482; IPR001849;	VPS13, repeated coiled region; PH domain-like; Vacuolar protein sorting-associated protein 13, SHR-binding domain; Vacuolar protein sorting-associated protein 13, second N-terminal domain; Vacuolar protein sorting-associated protein 13, N-terminal domain; Peroxin domain; Pleckstrin homology domain;
RchiOBHm_Chr7g0212781	56	1.811	Up	0.025997	K	PREDICTED: secretory carrier-associated membrane protein 4 isoform X1 [Fragaria vesca subsp. vesca]	---	0.986628	1.51e-13	213.77	HDATVDIPLDTMSDSK(0.987)QK(0.013)	3	-0.11749	11	0.627	0.776	0.934	1.186	1.264	1.782	plasma membrane	GO:0045184 establishment of protein localization; GO:0006810 transport; GO:0071702 organic substance transport; GO:0051179 localization; GO:0033036 macromolecule localization; GO:0008104 protein localization; GO:0015031 protein transport; GO:0051234 establishment of localization;	GO:0031224 intrinsic component of membrane; GO:0016020 membrane; GO:0016021 integral component of membrane; GO:0044425 membrane part;		K19995
RchiOBHm_Chr7g0221961	61	0.15	Down	0.04844	K	Putative ribosome biogenesis factor NIP7	---	1	4.47e-05	122.44	VYYVSDSLVK(1)R	2	0.060896	4	3.098	1.479			0.274	0.413	cytoplasm	GO:0044085 cellular component biogenesis; GO:0016043 cellular component organization; GO:0034622 cellular macromolecular complex assembly; GO:0022613 ribonucleoprotein complex biogenesis; GO:0022618 ribonucleoprotein complex assembly; GO:0042254 ribosome biogenesis; GO:0042255 ribosome assembly; GO:0043933 macromolecular complex subunit organization; GO:0071826 ribonucleoprotein complex subunit o…	GO:0043226 organelle; GO:0043231 intracellular membrane-bounded organelle; GO:0043229 intracellular organelle; GO:0005634 nucleus; GO:0044464 cell part; GO:0005622 intracellular; GO:0044424 intracellular part; GO:0043227 membrane-bounded organelle; GO:0005623 cell;	GO:0097159 organic cyclic compound binding; GO:1901363 heterocyclic compound binding; GO:0003723 RNA binding; GO:0005488 binding; GO:0003676 nucleic acid binding;	K07565			IPR015947; IPR002478;	PUA-like domain; PUA domain;
RchiOBHm_Chr7g0227641	569	0.585	Down	0.029603	K	"""Putative cellular retinaldehyde binding/alpha-tocopherol transport, GOLD domain, CRAL/TRIO"""	---	0.999975	2.18e-07	153.56	KVAPSDEPVISNSFK(1)IGEPGK	3	-1.231	9	1.019	1.265	1.578	0.742	0.887	0.632	cytoplasm	GO:0006810 transport; GO:0051179 localization; GO:0051234 establishment of localization;	GO:0016020 membrane; GO:0005622 intracellular; GO:0044464 cell part; GO:0044425 membrane part; GO:0031224 intrinsic component of membrane; GO:0005623 cell; GO:0016021 integral component of membrane;	GO:0005215 transporter activity;				IPR001251; IPR009038; IPR011074;	CRAL-TRIO lipid binding domain; GOLD domain; CRAL/TRIO, N-terminal domain;
