# Supplementary material for: Integrative analysis of transcriptome, proteome, and ubiquitome changes during rose petal abscission
Source: Front Plant Sci. 2022 Oct 19;13:1041141. doi: 10.3389/fpls.2022.1041141 (PMC9627506; doi:10.3389/fpls.2022.1041141)
Supplement: Supplementary Table 5 — Correlation between transcriptome and proteome. [file DataSheet_5.xlsx]

## Sheet: cluster 1
cluster 1 67 members was down-regulated in both transcript and protein levels
Transcription.ID	Protein.accession	Protein.description	Ratio	P.value	log2FC.x	log10p.x	Regulation.x	log2FC.y	FDR	log10p.y	Regulation.y	type
RchiOBHmChr1g0314131	RchiOBHm_Chr1g0314131	Putative linoleate 13S-lipoxygenase	0.627	0.0020755	-0.673463	2.68288	down	-1.71065	0.0104236	1.98198	down	down-down
RchiOBHmChr1g0314151	RchiOBHm_Chr1g0314151	Putative linoleate 13S-lipoxygenase	0.596	0.0006424	-0.746616	3.19219	down	-2.18324	1.66e-06	5.77989	down	down-down
RchiOBHmChr1g0314931	RchiOBHm_Chr1g0314931	Putative polygalacturonase	0.353	0.00080337	-1.50226	3.09508	down	-3.89595	1.38e-43	42.8601	down	down-down
RchiOBHmChr1g0343491	RchiOBHm_Chr1g0343491	Putative acyl-CoA desaturase	0.481	0.00107778	-1.05589	2.96747	down	-4.008	1.94e-21	20.7122	down	down-down
RchiOBHmChr1g0343691	RchiOBHm_Chr1g0343691	Putative aldehyde oxygenase (deformylating)	0.56	0.022405	-0.836501	1.64966	down	-3.23807	5.6e-18	17.2518	down	down-down
RchiOBHmChr1g0343791	RchiOBHm_Chr1g0343791	Putative aldehyde oxygenase (deformylating)	0.598	0.039417	-0.741783	1.40432	down	-3.36732	2.24e-39	38.6498	down	down-down
RchiOBHmChr1g0353741	RchiOBHm_Chr1g0353741	Putative glutathione-regulated potassium-efflux system protein KefB	0.643	0.0057373	-0.637109	2.24129	down	-1.08477	4.08e-08	7.38934	down	down-down
RchiOBHmChr1g0364651	RchiOBHm_Chr1g0364651	Putative S-crystallin	0.62	0.0034372	-0.68966	2.4638	down	-1.22073	0.0311083	1.50712	down	down-down
RchiOBHmChr1g0370001	RchiOBHm_Chr1g0370001	PREDICTED: protein yippee-like isoform X1 [Fragaria vesca subsp. vesca]	0.512	0.0068807	-0.965784	2.16237	down	-1.03602	3.18e-06	5.49757	down	down-down
RchiOBHmChr1g0374511	RchiOBHm_Chr1g0374511	Acid beta-fructofuranosidase 1, vacuolar	0.629	0.020203	-0.668868	1.69458	down	-2.22712	1.63e-10	9.78781	down	down-down
RchiOBHmChr1g0378941	RchiOBHm_Chr1g0378941	Anthocyanidin 5,3-O-glucosyltransferase	0.663	0.00077797	-0.592919	3.10904	down	-2.25173	2.54e-23	22.5952	down	down-down
RchiOBHmChr1g0380731	RchiOBHm_Chr1g0380731	Putative pectinesterase	0.624	0.0110615	-0.680382	1.95619	down	-1.45778	4.08e-09	8.38934	down	down-down
RchiOBHmChr2g0089811	RchiOBHm_Chr2g0089811	Putative oleoyl-[acyl-carrier-protein] hydrolase	0.589	0.021996	-0.76366	1.65766	down	-1.38271	2.01e-12	11.6968	down	down-down
RchiOBHmChr2g0090721	RchiOBHm_Chr2g0090721	Putative oxidoreductase	0.541	0.00164198	-0.8863	2.78463	down	-2.38461	7.04e-05	4.15243	down	down-down
RchiOBHmChr2g0096661	RchiOBHm_Chr2g0096661	transmembrane protein, putative [Medicago truncatula]	0.245	0.000139784	-2.02915	3.85454	down	-1.71106	5.42e-18	17.266	down	down-down
RchiOBHmChr2g0096691	RchiOBHm_Chr2g0096691	Putative diacylglycerol O-acyltransferase	0.49	0.018401	-1.02915	1.73516	down	-1.83095	1.38e-20	19.8601	down	down-down
RchiOBHmChr2g0100521	RchiOBHm_Chr2g0100521	Putative dehydrin	0.296	1.1588e-07	-1.75633	6.93599	down	-3.60631	8.66e-12	11.0625	down	down-down
RchiOBHmChr2g0105701	RchiOBHm_Chr2g0105701	Zeaxanthin epoxidase	0.526	0.0027994	-0.926865	2.55294	down	-2.16427	3.45e-28	27.4622	down	down-down
RchiOBHmChr2g0108401	RchiOBHm_Chr2g0108401	Putative xyloglucan 6-xylosyltransferase	0.049	0.0024211	-4.35107	2.61599	down	-1.9507	1.32e-19	18.8794	down	down-down
RchiOBHmChr2g0110711	RchiOBHm_Chr2g0110711	Putative 1-deoxy-D-xylulose-5-phosphate synthase	0.511	0.010004	-0.968605	1.99983	down	-1.84638	1.33e-20	19.8761	down	down-down
RchiOBHmChr2g0111951	RchiOBHm_Chr2g0111951	Putative laccase	0.575	0.005023	-0.798366	2.29904	down	-3.45809	7.94e-26	25.1002	down	down-down
RchiOBHmChr2g0142571	RchiOBHm_Chr2g0142571	Putative inorganic diphosphatase	0.42	0.029682	-1.25154	1.52751	down	-1.51598	3.11e-14	13.5072	down	down-down
RchiOBHmChr2g0150131	RchiOBHm_Chr2g0150131	Putative glycosyltransferase	0.183	0.000141696	-2.45008	3.84864	down	-1.33529	3.06e-06	5.51428	down	down-down
RchiOBHmChr2g0152351	RchiOBHm_Chr2g0152351	Putative 15-cis-phytoene synthase	0.456	0.0051574	-1.13289	2.28757	down	-1.80062	1.46e-13	12.8356	down	down-down
RchiOBHmChr2g0155831	RchiOBHm_Chr2g0155831	Putative cadmium-transporting ATPase	0.634	0.0057634	-0.657445	2.23932	down	-2.24921	1.16e-30	29.9355	down	down-down
RchiOBHmChr2g0157181	RchiOBHm_Chr2g0157181	PREDICTED: major latex allergen Hev b 5-like [Fragaria vesca subsp. vesca]	0.586	0.00093592	-0.771027	3.02876	down	-3.4151	4.22e-13	12.3747	down	down-down
RchiOBHmChr2g0157791	RchiOBHm_Chr2g0157791	Putative acyl-CoA desaturase	0.564	0.0107048	-0.826233	1.97042	down	-1.35824	1.44e-06	5.84164	down	down-down
RchiOBHmChr2g0169841	RchiOBHm_Chr2g0169841	Putative xenobiotic-transporting ATPase	0.548	0.0050563	-0.867752	2.29617	down	-1.63755	5.79e-17	16.2373	down	down-down
RchiOBHmChr2g0172331	RchiOBHm_Chr2g0172331	Putative transcription factor MYB-HB-like family	0.401	0.0060176	-1.31833	2.22058	down	-2.94251	5.66e-43	42.2472	down	down-down
RchiOBHmChr2g0172841	RchiOBHm_Chr2g0172841	PREDICTED: titin isoform X2 [Fragaria vesca subsp. vesca]	0.661	0.0055037	-0.597278	2.25935	down	-1.13363	2.61e-08	7.58336	down	down-down
RchiOBHmChr2g0173611	RchiOBHm_Chr2g0173611	Putative serine aminopeptidase, S33, alpha/Beta hydrolase	0.509	0.0133245	-0.974262	1.87535	down	-1.75738	2.23e-18	17.6517	down	down-down
RchiOBHmChr3g0462961	RchiOBHm_Chr3g0462961	Putative anthocyanidin synthase	0.195	0.036439	-2.35845	1.43843	down	-2.16443	1.6e-15	14.7959	down	down-down
RchiOBHmChr3g0468121	RchiOBHm_Chr3g0468121	Putative protein-serine/threonine phosphatase	0.469	0.00192214	-1.09234	2.71621	down	-1.91044	1.55e-18	17.8097	down	down-down
RchiOBHmChr3g0471421	RchiOBHm_Chr3g0471421	Putative polyadenylate binding protein	0.261	0.000180807	-1.93788	3.74278	down	-1.66614	1.23e-08	7.91009	down	down-down
RchiOBHmChr3g0474581	RchiOBHm_Chr3g0474581	Putative Heat shock protein DnaJ, cysteine-rich	0.524	0.0081815	-0.932361	2.08717	down	-1.35733	3.41e-12	11.4672	down	down-down
RchiOBHmChr3g0480801	RchiOBHm_Chr3g0480801	nucleolar gar2-like protein [Medicago truncatula]	0.187	0.0082423	-2.41889	2.08395	down	-1.52307	1.59e-12	11.7986	down	down-down
RchiOBHmChr4g0386051	RchiOBHm_Chr4g0386051	Putative methyltransferase	0.493	0.03354	-1.02034	1.47444	down	-1.60575	3.58e-13	12.4461	down	down-down
RchiOBHmChr4g0405441	RchiOBHm_Chr4g0405441	Putative clustered mitochondria protein	0.168	0.011785	-2.57347	1.92867	down	-1.63225	8.69e-09	8.06098	down	down-down
RchiOBHmChr4g0413621	RchiOBHm_Chr4g0413621	Putative UDP-glucuronate 4-epimerase	0.482	0.00156215	-1.05289	2.80628	down	-1.02865	3.61e-05	4.44249	down	down-down
RchiOBHmChr4g0422421	RchiOBHm_Chr4g0422421	Putative plus-end-directed kinesin ATPase	0.353	0.049222	-1.50226	1.30784	down	-1.13191	9.43e-09	8.02549	down	down-down
RchiOBHmChr4g0427101	RchiOBHm_Chr4g0427101	Putative methionine adenosyltransferase	0.6	0.0125172	-0.736966	1.90249	down	-1.1599	3.52e-07	6.45346	down	down-down
RchiOBHmChr4g0433251	RchiOBHm_Chr4g0433251	Putative alpha-glucan, water dikinase	0.63	0.0026377	-0.666576	2.57877	down	-1.19754	3.66e-05	4.43652	down	down-down
RchiOBHmChr4g0442811	RchiOBHm_Chr4g0442811	Putative dynamin central domain, dynamin, GTPase domain, GTPase effector domain, Dynamin superfamily	0.656	0.0046034	-0.608232	2.33692	down	-1.25675	7.07e-09	8.15058	down	down-down
RchiOBHmChr4g0444321	RchiOBHm_Chr4g0444321	Putative START-like domain, Bet v I type allergen	0.629	0.00119525	-0.668868	2.92254	down	-2.24626	2.56e-10	9.59176	down	down-down
RchiOBHmChr5g0001831	RchiOBHm_Chr5g0001831	1-aminocyclopropane-1-carboxylate oxidase 2	0.598	0.026399	-0.741783	1.57841	down	-1.66565	1.24e-10	9.90658	down	down-down
RchiOBHmChr5g0035341	RchiOBHm_Chr5g0035341	Putative Arf GTPase activating protein	0.593	0.00069827	-0.753896	3.15598	down	-1.06781	8.05e-08	7.0942	down	down-down
RchiOBHmChr5g0042791	RchiOBHm_Chr5g0042791	Putative gliding motility-associated protein GldE	0.282	0.0180832	-1.82623	1.74272	down	-1.2953	1.21e-09	8.91721	down	down-down
RchiOBHmChr5g0061821	RchiOBHm_Chr5g0061821	Putative protein kinase AGC-RSK-2 family	0.397	0.004637	-1.33279	2.33376	down	-1.89215	6.1e-22	21.2147	down	down-down
RchiOBHmChr5g0073591	RchiOBHm_Chr5g0073591	Putative Root phototropism protein	0.207	0.0031431	-2.2723	2.50264	down	-3.51326	5.96e-63	62.2248	down	down-down
RchiOBHmChr6g0246311	RchiOBHm_Chr6g0246311	nicotiana tabacum ORF protein [Medicago truncatula]	0.561	0.0036811	-0.833927	2.43402	down	-1.85664	1.28e-09	8.89279	down	down-down
RchiOBHmChr6g0265271	RchiOBHm_Chr6g0265271	Putative glucose-1-phosphate adenylyltransferase	0.63	0.0056622	-0.666576	2.24701	down	-1.84151	1.15e-20	19.9393	down	down-down
RchiOBHmChr6g0287381	RchiOBHm_Chr6g0287381	Putative long-chain-alcohol oxidase	0.4	0.00083779	-1.32193	3.07686	down	-2.49194	8.98e-19	18.0467	down	down-down
RchiOBHmChr6g0287891	RchiOBHm_Chr6g0287891	Putative arabinose-5-phosphate isomerase	0.601	0.0130242	-0.734563	1.88525	down	-1.05444	1.4e-07	6.85387	down	down-down
RchiOBHmChr6g0291361	RchiOBHm_Chr6g0291361	Putative trans-2,3-dihydro-3-hydroxyanthranilate isomerase	0.566	0.027675	-0.821126	1.55791	down	-1.19491	0.000189329	3.72278	down	down-down
RchiOBHmChr6g0294341	RchiOBHm_Chr6g0294341	Putative pectinesterase	0.523	0.044736	-0.935117	1.34934	down	-1.90792	2.77e-15	14.5575	down	down-down
RchiOBHmChr6g0301451	RchiOBHm_Chr6g0301451	Putative glucose-1-phosphate adenylyltransferase	0.645	0.0111159	-0.632629	1.95406	down	-1.91464	7.35e-13	12.1337	down	down-down
RchiOBHmChr6g0303041	RchiOBHm_Chr6g0303041	Putative thaumatin	0.475	0.010837	-1.074	1.96509	down	-3.04729	1.64e-28	27.7852	down	down-down
RchiOBHmChr7g0178451	RchiOBHm_Chr7g0178451	Putative C2 domain-containing protein	0.619	0.023416	-0.691989	1.63049	down	-1.24721	6.89e-10	9.16178	down	down-down
RchiOBHmChr7g0182961	RchiOBHm_Chr7g0182961	Putative flavonoid 3'-monooxygenase	0.634	0.00159703	-0.657445	2.79669	down	-1.46652	8.13e-06	5.08991	down	down-down
RchiOBHmChr7g0183301	RchiOBHm_Chr7g0183301	PREDICTED: protein SPIRAL1-like 2 [Fragaria vesca subsp. vesca]	0.488	0.0065381	-1.03505	2.18455	down	-1.13368	3.21e-08	7.49349	down	down-down
RchiOBHmChr7g0188551	RchiOBHm_Chr7g0188551	Putative xylogalacturonan beta-1,3-xylosyltransferase	0.637	0.0143977	-0.650635	1.84171	down	-1.04386	3.49e-07	6.45717	down	down-down
RchiOBHmChr7g0197251	RchiOBHm_Chr7g0197251	Putative cytochrome P450	0.564	0.0063007	-0.826233	2.20061	down	-2.1056	8.81e-26	25.055	down	down-down
RchiOBHmChr7g0213351	RchiOBHm_Chr7g0213351	Putative S-adenosyl-L-methionine-dependent methyltransferase	0.332	5.5814e-05	-1.59074	4.25326	down	-1.25744	2.69e-08	7.57025	down	down-down
RchiOBHmChr7g0217381	RchiOBHm_Chr7g0217381	PREDICTED: calvin cycle protein CP12-3, chloroplastic [Fragaria vesca subsp. vesca]	0.23	8.1847e-05	-2.12029	4.087	down	-1.22212	5.01e-10	9.30016	down	down-down
RchiOBHmChr7g0222091	RchiOBHm_Chr7g0222091	Putative 11-S seed storage protein, plant	0.659	0.00055784	-0.60165	3.25349	down	-3.14654	6.34e-13	12.1979	down	down-down
RchiOBHmChr7g0231091	RchiOBHm_Chr7g0231091	Putative 7-deoxyloganetin glucosyltransferase	0.643	0.00020428	-0.637109	3.68977	down	-2.33625	1.28e-32	31.8928	down	down-down
RchiOBHmChr7g0239311	RchiOBHm_Chr7g0239311	Putative DNA oxidative demethylase	0.586	0.0050751	-0.771027	2.29456	down	-1.36266	1.93e-11	10.7144	down	down-down

## Sheet: cluster 2
Transcription.ID	Protein.accession	Protein.description	Ratio	P.value	log2FC.x	log10p.x	Regulation.x	log2FC.y	FDR	log10p.y	Regulation.y	type
RchiOBHmChr1g0314781	RchiOBHm_Chr1g0314781	Putative chaperone DnaJ	0.614	0.0181982	-0.703689	1.73997	down	0.392869	0.182723	0.738207	unchange	down-unchange
RchiOBHmChr1g0316091	RchiOBHm_Chr1g0316091	Putative cellulose synthase (UDP-forming) chromatin regulator PHD family	0.364	0.00195618	-1.45799	2.70859	down	-0.0630234	0.85215	0.0694841	unchange	down-unchange
RchiOBHmChr1g0318401	RchiOBHm_Chr1g0318401	Putative methionine N(alpha)-acetyltransferase NatB transcription regulator GNAT family	0.53	0.002099	-0.915936	2.67799	down	-0.0453712	0.874725	0.0581286	unchange	down-unchange
RchiOBHmChr1g0325641	RchiOBHm_Chr1g0325641	Putative protein ENHANCED DISEASE RESISTANCE 2, START	0.517	0.00128375	-0.951764	2.89152	down	0.371581	0.427831	0.368727	unchange	down-unchange
RchiOBHmChr1g0326411	RchiOBHm_Chr1g0326411	plant/MOJ9-14 protein [Medicago truncatula]	0.642	0.00168348	-0.639355	2.77379	down	-0.166498	0.538246	0.269019	unchange	down-unchange
RchiOBHmChr1g0327981	RchiOBHm_Chr1g0327981	Putative endopeptidase Clp	0.65	0.0028611	-0.621488	2.54347	down	-0.600198	0.0227589	1.64285	unchange	down-unchange
RchiOBHmChr1g0331511	RchiOBHm_Chr1g0331511	Putative xylogalacturonan beta-1,3-xylosyltransferase	0.569	0.027665	-0.813499	1.55807	down	-0.0502451	0.901772	0.0449032	unchange	down-unchange
RchiOBHmChr1g0331941	RchiOBHm_Chr1g0331941	Putative transcription factor C2H2 family	0.593	0.0024842	-0.753896	2.60481	down	0.100495	0.755414	0.121815	unchange	down-unchange
RchiOBHmChr1g0333181	RchiOBHm_Chr1g0333181	Putative cytochrome P450	0.468	0.0038988	-1.09542	2.40907	down	0.866464	0.309209	0.509748	unchange	down-unchange
RchiOBHmChr1g0336121	RchiOBHm_Chr1g0336121	PREDICTED: leucine--tRNA ligase, cytoplasmic [Prunus mume]	0.586	0.0041838	-0.771027	2.37843	down	0.30692	0.217509	0.662522	unchange	down-unchange
RchiOBHmChr1g0340731	RchiOBHm_Chr1g0340731	Putative transcription regulator SWI/SNF-BAF60b family	0.449	0.043562	-1.15521	1.36089	down	0.396214	0.268644	0.570823	unchange	down-unchange
RchiOBHmChr1g0342581	RchiOBHm_Chr1g0342581	Putative tubulin-specific chaperone D, tubulin-folding cofactor D	0.649	0.00038446	-0.62371	3.41515	down	0.455295	0.110745	0.955677	unchange	down-unchange
RchiOBHmChr1g0344441	RchiOBHm_Chr1g0344441	PREDICTED: eukaryotic translation initiation factor 4G [Fragaria vesca subsp. vesca]	0.536	0.000118556	-0.899695	3.92608	down	-0.577085	0.00673633	2.17158	unchange	down-unchange
RchiOBHmChr1g0349471	RchiOBHm_Chr1g0349471	PREDICTED: coiled-coil domain-containing protein 115 isoform X2 [Fragaria vesca subsp. vesca]	0.236	0.0045008	-2.08314	2.34671	down	-0.532724	0.0393298	1.40528	unchange	down-unchange
RchiOBHmChr1g0351641	RchiOBHm_Chr1g0351641	Putative polygalacturonate 4-alpha-galacturonosyltransferase	0.652	0.0110589	-0.617056	1.95629	down	-0.314156	0.18832	0.725104	unchange	down-unchange
RchiOBHmChr1g0353371	RchiOBHm_Chr1g0353371	transmembrane protein [Arabidopsis thaliana]	0.541	0.023164	-0.8863	1.63519	down	-0.0130757	0.985273	0.00644348	unchange	down-unchange
RchiOBHmChr1g0355771	RchiOBHm_Chr1g0355771	Putative major intrinsic protein	0.517	0.00026365	-0.951764	3.57897	down	0.338382	0.1666	0.778326	unchange	down-unchange
RchiOBHmChr1g0356151	RchiOBHm_Chr1g0356151	Putative mesoderm development candidate 2	0.653	0.00064191	-0.614845	3.19253	down	-0.842579	0.00106906	2.971	unchange	down-unchange
RchiOBHmChr1g0357851	RchiOBHm_Chr1g0357851	PREDICTED: reticulon-like protein B5 [Fragaria vesca subsp. vesca]	0.664	0.030235	-0.590745	1.51949	down	-0.0220312	0.939721	0.027001	unchange	down-unchange
RchiOBHmChr1g0359611	RchiOBHm_Chr1g0359611	Putative polyketide cyclase/dehydrase, START-like domain-containing protein	0.169	0.00063701	-2.5649	3.19585	down	-0.560251	0.559761	0.251997	unchange	down-unchange
RchiOBHmChr1g0360111	RchiOBHm_Chr1g0360111	Putative transcription factor WD40-like family	0.568	0.023561	-0.816037	1.62781	down	-0.179552	0.537044	0.26999	unchange	down-unchange
RchiOBHmChr1g0361821	RchiOBHm_Chr1g0361821	Putative phosphoesterase metallo-dependent phosphatase	0.522	0.0100013	-0.937878	1.99994	down	0.184595	0.665602	0.176785	unchange	down-unchange
RchiOBHmChr1g0363881	RchiOBHm_Chr1g0363881	Putative Taxilin family	0.526	0.0030422	-0.926865	2.51681	down	0.529002	0.0542435	1.26565	unchange	down-unchange
RchiOBHmChr1g0364181	RchiOBHm_Chr1g0364181	Putative non-specific serine/threonine protein kinase	0.463	0.0092645	-1.11092	2.03318	down	-0.247728	0.294095	0.531513	unchange	down-unchange
RchiOBHmChr1g0364631	RchiOBHm_Chr1g0364631	Putative Rab-GTPase-TBC domain-containing protein	0.394	8.322e-05	-1.34373	4.07977	down	-0.114212	0.67906	0.168092	unchange	down-unchange
RchiOBHmChr1g0367031	RchiOBHm_Chr1g0367031	Putative oxidoreductase	0.44	0.0070588	-1.18442	2.15127	down	-0.281949	0.259726	0.585485	unchange	down-unchange
RchiOBHmChr1g0368531	RchiOBHm_Chr1g0368531	Putative mitochondrial glycoprotein	0.529	0.0174983	-0.91866	1.757	down	0.322684	0.196973	0.705593	unchange	down-unchange
RchiOBHmChr1g0368611	RchiOBHm_Chr1g0368611	Putative xylogalacturonan beta-1,3-xylosyltransferase	0.581	0.0068351	-0.78339	2.16526	down	0.23525	0.489088	0.310613	unchange	down-unchange
RchiOBHmChr1g0369551	RchiOBHm_Chr1g0369551	Putative hexosyltransferase	0.617	0.0032978	-0.696658	2.48178	down	-0.224687	0.435958	0.360555	unchange	down-unchange
RchiOBHmChr1g0370231	RchiOBHm_Chr1g0370231	Putative phosphoinositide phospholipase C	0.502	0.00064241	-0.994241	3.19219	down	0.223287	0.382925	0.416887	unchange	down-unchange
RchiOBHmChr1g0370391	RchiOBHm_Chr1g0370391	Putative anthocyanidin synthase	0.518	0.0094844	-0.948976	2.02299	down	-0.79931	0.00361315	2.44211	unchange	down-unchange
RchiOBHmChr1g0370931	RchiOBHm_Chr1g0370931	Putative phosphoric monoester hydrolase	0.521	0.0017159	-0.940645	2.76551	down	-0.174641	0.496252	0.304298	unchange	down-unchange
RchiOBHmChr1g0372341	RchiOBHm_Chr1g0372341	PREDICTED: aminoacyl tRNA synthase complex-interacting multifunctional protein 1 [Fragaria vesca subsp.vesca]	0.571	0.0080234	-0.808437	2.09564	down	0.713829	0.000936784	3.02836	unchange	down-unchange
RchiOBHmChr1g0372681	RchiOBHm_Chr1g0372681	import inner membrane translocase subunit [Arabidopsis thaliana]	0.471	0.0063039	-1.0862	2.20039	down	-0.573979	0.026829	1.57139	unchange	down-unchange
RchiOBHmChr1g0373331	RchiOBHm_Chr1g0373331	PREDICTED: leucine--tRNA ligase, cytoplasmic [Prunus mume]	0.601	0.0015229	-0.734563	2.81733	down	-0.263758	0.279124	0.554203	unchange	down-unchange
RchiOBHmChr1g0374721	RchiOBHm_Chr1g0374721	Putative pectinesterase	0.329	0.0081618	-1.60384	2.08821	down	-0.850982	0.000424716	3.3719	unchange	down-unchange
RchiOBHmChr1g0377381	RchiOBHm_Chr1g0377381	Putative protein xylosyltransferase	0.627	0.0065372	-0.673463	2.18461	down	-0.490404	0.0276881	1.55771	unchange	down-unchange
RchiOBHmChr1g0379531	RchiOBHm_Chr1g0379531	Putative P-loop containing nucleoside triphosphate hydrolase	0.651	0.027815	-0.619271	1.55572	down	-0.197798	0.416422	0.380466	unchange	down-unchange
RchiOBHmChr1g0380871	RchiOBHm_Chr1g0380871	Putative HSP20-like chaperone	0.562	0.00095882	-0.831358	3.01826	down	-0.0638728	0.814811	0.0889432	unchange	down-unchange
RchiOBHmChr1g0383371	RchiOBHm_Chr1g0383371	Putative TATA-binding protein interacting (TIP20)	0.634	3.5775e-05	-0.657445	4.44642	down	0.170329	0.524176	0.280523	unchange	down-unchange
RchiOBHmChr1g0384261	RchiOBHm_Chr1g0384261	Putative 1,4-beta-D-xylan synthase transcription factor C2H2 family	0.327	0.011256	-1.61264	1.94862	down	0.403576	0.30399	0.517141	unchange	down-unchange
RchiOBHmChr1g0384501	RchiOBHm_Chr1g0384501	Putative WEB family protein	0.455	0.0004157	-1.13606	3.38122	down	-0.0491805	0.880825	0.0551106	unchange	down-unchange
RchiOBHmChr2g0084381	RchiOBHm_Chr2g0084381	Putative Late embryogenesis abundant protein, LEA-14	0.323	0.000160296	-1.63039	3.79508	down	-0.750049	0.00026861	3.57088	unchange	down-unchange
RchiOBHmChr2g0084901	RchiOBHm_Chr2g0084901	Putative UDP-glucuronosyl/UDP-glucosyltransferase	0.211	0.0021643	-2.24469	2.66468	down	0.177834	0.657161	0.182328	unchange	down-unchange
RchiOBHmChr2g0085721	RchiOBHm_Chr2g0085721	Putative translation elongation factor IF5A, translation elongation factor P	0.466	0.025618	-1.1016	1.59145	down	0.319195	0.205429	0.687338	unchange	down-unchange
RchiOBHmChr2g0086111	RchiOBHm_Chr2g0086111	ubiquitin-associated protein (DUF1068) [Arabidopsis thaliana]	0.618	0.0111371	-0.694321	1.95323	down	-0.282207	0.244075	0.612476	unchange	down-unchange
RchiOBHmChr2g0087061	RchiOBHm_Chr2g0087061	Putative mannose-6-phosphate receptor binding domain-containing protein	0.41	0.0065822	-1.2863	2.18163	down	0.0177785	0.9702	0.0131388	unchange	down-unchange
RchiOBHmChr2g0087491	RchiOBHm_Chr2g0087491	Putative sucrose-phosphate synthase	0.392	0.00082264	-1.35107	3.08479	down	-0.65276	0.00229721	2.6388	unchange	down-unchange
RchiOBHmChr2g0088431	RchiOBHm_Chr2g0088431	Putative S-adenosyl-L-methionine-dependent methyltransferase	0.616	0.0151355	-0.698998	1.82	down	-0.328755	0.269216	0.569899	unchange	down-unchange
RchiOBHmChr2g0090191	RchiOBHm_Chr2g0090191	Putative signal peptidase I	0.638	0.0021556	-0.648372	2.66643	down	-0.578638	0.0636929	1.19591	unchange	down-unchange
RchiOBHmChr2g0091401	RchiOBHm_Chr2g0091401	Putative Ninja family, Jas TPL-binding domain-containing protein	0.326	0.0106217	-1.61706	1.97381	down	-0.816169	5.81e-05	4.23582	unchange	down-unchange
RchiOBHmChr2g0091531	RchiOBHm_Chr2g0091531	Putative SKI-interacting protein, SKIP	0.475	0.049856	-1.074	1.30228	down	-0.625934	0.00221124	2.65536	unchange	down-unchange
RchiOBHmChr2g0091661	RchiOBHm_Chr2g0091661	Putative Golgin subfamily A member 5 protein	0.293	0.0071004	-1.77103	2.14872	down	-0.515374	0.0223594	1.65054	unchange	down-unchange
RchiOBHmChr2g0092211	RchiOBHm_Chr2g0092211	Putative profilin	0.529	0.032542	-0.91866	1.48756	down	-0.0885352	0.757272	0.120748	unchange	down-unchange
RchiOBHmChr2g0092951	RchiOBHm_Chr2g0092951	Putative saposin B type domain-containing protein	0.616	0.021739	-0.698998	1.66276	down	-0.612303	0.00917161	2.03755	unchange	down-unchange
RchiOBHmChr2g0095311	RchiOBHm_Chr2g0095311	Putative cucumisin	0.513	0.00098337	-0.962969	3.00728	down	-0.579959	0.00609257	2.2152	unchange	down-unchange
RchiOBHmChr2g0097571	RchiOBHm_Chr2g0097571	PREDICTED: protein GRIP [Fragaria vesca subsp. vesca]	0.619	0.00186104	-0.691989	2.73024	down	-0.74914	0.135578	0.867812	unchange	down-unchange
RchiOBHmChr2g0097581	RchiOBHm_Chr2g0097581	PREDICTED: protein GRIP [Fragaria vesca subsp. vesca]	0.594	0.0029045	-0.751465	2.53693	down	-0.216798	0.628402	0.201762	unchange	down-unchange
RchiOBHmChr2g0098371	RchiOBHm_Chr2g0098371	Putative procollagen-proline dioxygenase	0.403	0.00044485	-1.31115	3.35179	down	-0.423754	0.055669	1.25439	unchange	down-unchange
RchiOBHmChr2g0100181	RchiOBHm_Chr2g0100181	Putative monodehydroascorbate reductase (NADH)	0.665	0.00168201	-0.588574	2.77417	down	0.498718	0.0521546	1.28271	unchange	down-unchange
RchiOBHmChr2g0100611	RchiOBHm_Chr2g0100611	Putative thioredoxin-like protein	0.395	0.00140174	-1.34008	2.85333	down	-0.0821541	0.805908	0.0937145	unchange	down-unchange
RchiOBHmChr2g0103241	RchiOBHm_Chr2g0103241	Putative tetratricopeptide-like helical domain-containing protein	0.46	0.0099436	-1.12029	2.00246	down	0.139031	0.651326	0.186201	unchange	down-unchange
RchiOBHmChr2g0104961	RchiOBHm_Chr2g0104961	Putative protein kinase CAMK-CDPK family	0.635	0.0054568	-0.655172	2.26306	down	-0.336207	0.142595	0.845896	unchange	down-unchange
RchiOBHmChr2g0105091	RchiOBHm_Chr2g0105091	Putative methionyl aminopeptidase	0.603	0.0041587	-0.72977	2.38104	down	-0.132222	0.725217	0.139532	unchange	down-unchange
RchiOBHmChr2g0107441	RchiOBHm_Chr2g0107441	Putative protein kinase CMGC-CK2 family	0.585	0.0052243	-0.773491	2.28197	down	-0.34295	0.141198	0.850172	unchange	down-unchange
RchiOBHmChr2g0109071	RchiOBHm_Chr2g0109071	Putative S-adenosyl-L-methionine-dependent methyltransferase	0.534	0.00104074	-0.905088	2.98266	down	-0.797388	6.61e-05	4.1798	unchange	down-unchange
RchiOBHmChr2g0109961	RchiOBHm_Chr2g0109961	Eukaryotic translation initiation factor 2 subunit beta	0.622	0.0029375	-0.685014	2.53202	down	0.0364927	0.933606	0.0298364	unchange	down-unchange
RchiOBHmChr2g0111231	RchiOBHm_Chr2g0111231	Putative GDP-fucose protein O-fucosyltransferase	0.649	0.0153003	-0.62371	1.8153	down	0.660433	0.00140537	2.85221	unchange	down-unchange
RchiOBHmChr2g0112261	RchiOBHm_Chr2g0112261	phage capsid scaffolding protein (GPO) serine peptidase [Medicago truncatula]	0.508	0.00108369	-0.9771	2.96509	down	0.528168	0.14538	0.837496	unchange	down-unchange
RchiOBHmChr2g0112721	RchiOBHm_Chr2g0112721	Putative 3-deoxy-7-phosphoheptulonate synthase	0.393	0.00024143	-1.3474	3.61721	down	-0.996705	1.13e-06	5.94692	unchange	down-unchange
RchiOBHmChr2g0113231	RchiOBHm_Chr2g0113231	Putative ubiquitinyl hydrolase 1	0.608	0.000144707	-0.717857	3.83951	down	-0.348111	0.148784	0.827444	unchange	down-unchange
RchiOBHmChr2g0113351	RchiOBHm_Chr2g0113351	Putative transcription factor CG1-CAMTA family	0.594	0.0177027	-0.751465	1.75196	down	0.275987	0.254125	0.594952	unchange	down-unchange
RchiOBHmChr2g0114441	RchiOBHm_Chr2g0114441	Putative DNA oxidative demethylase	0.489	0.0070425	-1.03209	2.15227	down	-0.00154836	0.986735	0.00579932	unchange	down-unchange
RchiOBHmChr2g0115531	RchiOBHm_Chr2g0115531	Putative C2 domain-containing protein	0.578	0.00036368	-0.790859	3.43928	down	-0.126918	0.666912	0.175931	unchange	down-unchange
RchiOBHmChr2g0115611	RchiOBHm_Chr2g0115611	Putative transcription regulator SAP family	0.518	0.00121968	-0.948976	2.91375	down	-0.0811403	0.780623	0.107559	unchange	down-unchange
RchiOBHmChr2g0122701	RchiOBHm_Chr2g0122701	Putative DnaJ domain-containing protein	0.464	0.0111172	-1.1078	1.954	down	-0.384532	0.0883832	1.05363	unchange	down-unchange
RchiOBHmChr2g0123581	RchiOBHm_Chr2g0123581	Putative GAT domain-containing protein	0.622	0.004136	-0.685014	2.38342	down	0.0647271	0.90663	0.04257	unchange	down-unchange
RchiOBHmChr2g0126631	RchiOBHm_Chr2g0126631	Putative mannan endo-1,4-beta-mannosidase	0.614	0.00161922	-0.703689	2.79069	down	-0.283314	0.322424	0.491572	unchange	down-unchange
RchiOBHmChr2g0128381	RchiOBHm_Chr2g0128381	Putative endosulphine	0.35	0.031461	-1.51457	1.50223	down	0.0105265	1	0	unchange	down-unchange
RchiOBHmChr2g0129771	RchiOBHm_Chr2g0129771	Putative protein kinase TKL-CTR1-DRK-1 family	0.596	0.035801	-0.746616	1.4461	down	0.429086	0.119132	0.923971	unchange	down-unchange
RchiOBHmChr2g0131831	RchiOBHm_Chr2g0131831	Putative UV excision repair protein Rad23	0.428	0.0044404	-1.22432	2.35258	down	-0.134605	0.595311	0.225256	unchange	down-unchange
RchiOBHmChr2g0134411	RchiOBHm_Chr2g0134411	Putative cobalamin (vitamin B12) biosynthesis CobW	0.446	0.00141821	-1.16488	2.84826	down	0.0763319	0.81377	0.0894982	unchange	down-unchange
RchiOBHmChr2g0135221	RchiOBHm_Chr2g0135221	Putative non-specific protein-tyrosine kinase RLK-Pelle-RLCK-XV family	0.592	0.0078172	-0.756331	2.10695	down	-0.406934	0.0877356	1.05682	unchange	down-unchange
RchiOBHmChr2g0136541	RchiOBHm_Chr2g0136541	Putative acetyl-CoA carboxylase	0.594	0.0157428	-0.751465	1.80292	down	-0.684891	0.00898858	2.04631	unchange	down-unchange
RchiOBHmChr2g0136911	RchiOBHm_Chr2g0136911	Putative chaperone DnaJ	0.57	0.025019	-0.810966	1.60173	down	0.0500825	0.868449	0.0612559	unchange	down-unchange
RchiOBHmChr2g0137111	RchiOBHm_Chr2g0137111	DUF2921 family protein [Medicago truncatula]	0.317	0.00031777	-1.65745	3.49789	down	-0.426408	0.0819242	1.08659	unchange	down-unchange
RchiOBHmChr2g0137391	RchiOBHm_Chr2g0137391	Putative methionine N(alpha)-acetyltransferase NatB	0.597	3.5765e-05	-0.744197	4.44654	down	-0.0846673	0.772635	0.112025	unchange	down-unchange
RchiOBHmChr2g0137631	RchiOBHm_Chr2g0137631	Putative PH domain, nuclear pore complex, NUP2/50/61 protein	0.494	0.0011988	-1.01742	2.92125	down	0.980971	0.574429	0.240763	unchange	down-unchange
RchiOBHmChr2g0138001	RchiOBHm_Chr2g0138001	BZIP protein [Medicago truncatula]	0.513	0.032125	-0.962969	1.49316	down	-0.492531	0.0338932	1.46989	unchange	down-unchange
RchiOBHmChr2g0139071	RchiOBHm_Chr2g0139071	Putative TATA element modulatory factor 1 TATA binding, TATA element modulatory factor 1 DNA binding	0.615	0.006963	-0.701342	2.1572	down	-0.552843	0.00918196	2.03706	unchange	down-unchange
RchiOBHmChr2g0139361	RchiOBHm_Chr2g0139361	DNA-directed RNA polymerase subunit beta [Arabidopsis thaliana]	0.519	0.0014577	-0.946194	2.83633	down	-0.0284697	0.973539	0.0116466	unchange	down-unchange
RchiOBHmChr2g0139461	RchiOBHm_Chr2g0139461	Putative protein kinase A anchor protein, nuclear localisation signal	0.398	0.00024453	-1.32916	3.61167	down	0.25567	0.359008	0.444896	unchange	down-unchange
RchiOBHmChr2g0139591	RchiOBHm_Chr2g0139591	PREDICTED: VHS domain-containing protein At3g16270 [Fragaria vesca subsp. vesca]	0.632	0.00025622	-0.662004	3.59139	down	NA	NA	NA	unchange	down-unchange
RchiOBHmChr2g0142431	RchiOBHm_Chr2g0142431	Putative flavanone 3-dioxygenase	0.238	0.0106608	-2.07097	1.97221	down	0.763971	0.000246052	3.60897	unchange	down-unchange
RchiOBHmChr2g0144721	RchiOBHm_Chr2g0144721	Putative LsmAD domain, ataxin-2, ataxin 2, SM domain-containing protein	0.542	0.0044583	-0.883635	2.35083	down	-0.430588	0.0576959	1.23885	unchange	down-unchange
RchiOBHmChr2g0145081	RchiOBHm_Chr2g0145081	Putative GTP binding protein, second	0.588	0.020181	-0.766112	1.69506	down	0.156642	0.58668	0.231599	unchange	down-unchange
RchiOBHmChr2g0145961	RchiOBHm_Chr2g0145961	Putative linoleate 13S-lipoxygenase	0.316	0.00036257	-1.662	3.44061	down	3.48461	0.0940922	1.02645	unchange	down-unchange
RchiOBHmChr2g0147671	RchiOBHm_Chr2g0147671	Putative cucumisin	0.394	0.028362	-1.34373	1.54726	down	0.597836	0.00637083	2.1958	unchange	down-unchange
RchiOBHmChr2g0149831	RchiOBHm_Chr2g0149831	Putative adenosinetriphosphatase	0.389	0.0054008	-1.36216	2.26754	down	-0.211736	0.377841	0.42269	unchange	down-unchange
RchiOBHmChr2g0149901	RchiOBHm_Chr2g0149901	Putative GDP-fucose protein O-fucosyltransferase	0.556	0.00076122	-0.846843	3.11849	down	0.0848676	0.775443	0.11045	unchange	down-unchange
RchiOBHmChr2g0152091	RchiOBHm_Chr2g0152091	Putative 16S rRNA (cytosine(1407)-C(5))-methyltransferase	0.53	0.0077574	-0.915936	2.11028	down	0.628883	0.0967082	1.01454	unchange	down-unchange
RchiOBHmChr2g0154771	RchiOBHm_Chr2g0154771	Putative RNA helicase	0.553	0.027922	-0.854649	1.55405	down	-0.0941371	0.853868	0.0686092	unchange	down-unchange
RchiOBHmChr2g0155651	RchiOBHm_Chr2g0155651	Putative GDP-fucose protein O-fucosyltransferase	0.618	0.00047974	-0.694321	3.31899	down	-0.526056	0.639799	0.193956	unchange	down-unchange
RchiOBHmChr2g0155681	RchiOBHm_Chr2g0155681	Putative GBF-interacting protein	0.278	0.00083851	-1.84684	3.07649	down	-0.324276	0.185693	0.731205	unchange	down-unchange
RchiOBHmChr2g0156021	RchiOBHm_Chr2g0156021	Putative PAS-associated, phytochrome, histidine kinase domain, GAF domain-containing protein	0.66	0.0045185	-0.599462	2.34501	down	-0.615413	0.010309	1.98678	unchange	down-unchange
RchiOBHmChr2g0157441	RchiOBHm_Chr2g0157441	Putative transcription factor bZIP family	0.551	0.0137754	-0.859876	1.8609	down	-0.261303	0.339952	0.468582	unchange	down-unchange
RchiOBHmChr2g0157941	RchiOBHm_Chr2g0157941	Putative transcription factor C3H family	0.53	0.00034284	-0.915936	3.46491	down	-0.602912	0.00915418	2.03838	unchange	down-unchange
RchiOBHmChr2g0158641	RchiOBHm_Chr2g0158641	plant/T7A14-6 protein [Medicago truncatula]	0.547	0.0016357	-0.870387	2.7863	down	0.34768	0.145803	0.836235	unchange	down-unchange
RchiOBHmChr2g0158931	RchiOBHm_Chr2g0158931	Putative B-cell receptor-associated protein 29/31	0.451	0.00073634	-1.1488	3.13292	down	0.206795	0.464901	0.33264	unchange	down-unchange
RchiOBHmChr2g0161971	RchiOBHm_Chr2g0161971	Putative polygalacturonate 4-alpha-galacturonosyltransferase	0.621	0.00033976	-0.687335	3.46883	down	-0.136927	0.706702	0.150764	unchange	down-unchange
RchiOBHmChr2g0162181	RchiOBHm_Chr2g0162181	Putative protein kinase RLK-Pelle-LRR-V family	0.532	0.0116202	-0.910502	1.93479	down	-0.468522	0.0554885	1.2558	unchange	down-unchange
RchiOBHmChr2g0162201	RchiOBHm_Chr2g0162201	Putative lipoyl synthase	0.546	0.0172976	-0.873027	1.76201	down	-0.507793	0.0279631	1.55341	unchange	down-unchange
RchiOBHmChr2g0163401	RchiOBHm_Chr2g0163401	PREDICTED: putative nuclear matrix constituent protein 1-like protein [Fragaria vesca subsp. vesca]	0.378	0.00063851	-1.40354	3.19483	down	-0.261623	0.265361	0.576163	unchange	down-unchange
RchiOBHmChr2g0164371	RchiOBHm_Chr2g0164371	Putative Cell morphogenesis protein	0.634	0.0049998	-0.657445	2.30105	down	-0.364391	0.139211	0.856327	unchange	down-unchange
RchiOBHmChr2g0164791	RchiOBHm_Chr2g0164791	Putative aminoacyltransferase, E1 ubiquitin-activating enzyme	0.626	0.000162057	-0.675765	3.79033	down	-0.0695106	0.974016	0.0114339	unchange	down-unchange
RchiOBHmChr2g0165791	RchiOBHm_Chr2g0165791	Putative nuclear transport factor 2, nucleotide-binding alpha-beta plait domain, NTF2-like protein	0.426	0.0018373	-1.23107	2.73582	down	0.377495	0.294535	0.530863	unchange	down-unchange
RchiOBHmChr2g0167321	RchiOBHm_Chr2g0167321	pro-resilin, putative [Medicago truncatula]	0.522	0.0022965	-0.937878	2.63893	down	-0.449035	0.0577619	1.23836	unchange	down-unchange
RchiOBHmChr2g0167651	RchiOBHm_Chr2g0167651	Putative K domain-containing protein	0.609	0.00052032	-0.715486	3.28373	down	-0.15996	0.528254	0.277157	unchange	down-unchange
RchiOBHmChr2g0168761	RchiOBHm_Chr2g0168761	Putative xenobiotic-transporting ATPase	0.362	5.9295e-05	-1.46594	4.22698	down	0.497266	0.135147	0.869192	unchange	down-unchange
RchiOBHmChr2g0170411	RchiOBHm_Chr2g0170411	Putative carboxylesterase	0.528	0.0021622	-0.92139	2.6651	down	0.691578	0.0418325	1.37849	unchange	down-unchange
RchiOBHmChr2g0170441	RchiOBHm_Chr2g0170441	Putative sulfatase, GPI ethanolamine phosphate transferase 1	0.624	0.0047161	-0.680382	2.32642	down	0.501305	0.112204	0.949992	unchange	down-unchange
RchiOBHmChr2g0171051	RchiOBHm_Chr2g0171051	aminopeptidase (DUF3754) [Arabidopsis thaliana]	0.562	0.0146408	-0.831358	1.83444	down	-0.596649	0.00606335	2.21729	unchange	down-unchange
RchiOBHmChr2g0171061	RchiOBHm_Chr2g0171061	Putative CLASP domain-containing protein	0.604	0.00198382	-0.72738	2.7025	down	-0.603422	0.0164335	1.78427	unchange	down-unchange
RchiOBHmChr2g0172861	RchiOBHm_Chr2g0172861	PREDICTED: titin isoform X2 [Fragaria vesca subsp. vesca]	0.567	0.0045151	-0.818579	2.34533	down	NA	NA	NA	unchange	down-unchange
RchiOBHmChr2g0174121	RchiOBHm_Chr2g0174121	Putative GPI inositol-deacylase PGAP1, alpha/Beta hydrolase	0.654	0.0039441	-0.612637	2.40405	down	-0.0338658	0.937631	0.0279681	unchange	down-unchange
RchiOBHmChr3g0447951	RchiOBHm_Chr3g0447951	Putative Gdt1 family protein	0.617	0.00137524	-0.696658	2.86162	down	-0.690917	0.000920168	3.03613	unchange	down-unchange
RchiOBHmChr3g0448281	RchiOBHm_Chr3g0448281	Putative transcription factor WD40-like family	0.629	0.0043246	-0.668868	2.36405	down	0.332992	0.156878	0.804439	unchange	down-unchange
RchiOBHmChr3g0448711	RchiOBHm_Chr3g0448711	DNA-directed RNA polymerase subunit alpha [Arabidopsis thaliana]	0.584	9.9763e-05	-0.77596	4.00103	down	0.695229	0.0131835	1.87997	unchange	down-unchange
RchiOBHmChr3g0450031	RchiOBHm_Chr3g0450031	PREDICTED: rubisco accumulation factor 1, chloroplastic [Prunus mume]	0.592	0.0143393	-0.756331	1.84347	down	-0.185294	0.775284	0.110539	unchange	down-unchange
RchiOBHmChr3g0453131	RchiOBHm_Chr3g0453131	Putative shikimate dehydrogenase, 3-dehydroquinate dehydratase	0.664	0.0129555	-0.590745	1.88755	down	0.322736	0.231266	0.635888	unchange	down-unchange
RchiOBHmChr3g0456861	RchiOBHm_Chr3g0456861	Putative protein disulfide-isomerase	0.492	0.00069723	-1.02327	3.15662	down	-0.478536	0.031781	1.49783	unchange	down-unchange
RchiOBHmChr3g0458711	RchiOBHm_Chr3g0458711	PREDICTED: triadin-like isoform X2 [Prunus mume]	0.531	0.0103633	-0.913216	1.9845	down	-0.269306	0.278128	0.555756	unchange	down-unchange
RchiOBHmChr3g0459021	RchiOBHm_Chr3g0459021	Putative phytochrome, histidine kinase domain, GAF domain-containing protein	0.105	2.7415e-06	-3.25154	5.56201	down	-0.449552	0.0738107	1.13188	unchange	down-unchange
RchiOBHmChr3g0459321	RchiOBHm_Chr3g0459321	Putative ethanolamine-phosphate cytidylyltransferase	0.639	0.0068798	-0.646112	2.16242	down	-0.347436	0.117386	0.930385	unchange	down-unchange
RchiOBHmChr3g0460421	RchiOBHm_Chr3g0460421	Putative EGF-like calcium-binding domain, PA domain, thioredoxin-like protein	0.619	0.00029876	-0.691989	3.52468	down	-0.538893	0.0117204	1.93106	unchange	down-unchange
RchiOBHmChr3g0461841	RchiOBHm_Chr3g0461841	PREDICTED: LOW QUALITY PROTEIN: protein TIC 56, chloroplastic [Fragaria vesca subsp. vesca]	0.521	0.0021408	-0.940645	2.66942	down	0.412076	0.137394	0.862032	unchange	down-unchange
RchiOBHmChr3g0463011	RchiOBHm_Chr3g0463011	Putative terminal organelle assembly protein TopJ	0.128	0.0025164	-2.96578	2.59922	down	-0.535325	0.0169914	1.76977	unchange	down-unchange
RchiOBHmChr3g0463701	RchiOBHm_Chr3g0463701	Putative glycosyl transferase, family 1, Glycosyltransferase subfamily 4-like protein	0.62	0.00048154	-0.68966	3.31737	down	0.0215114	0.980282	0.00864899	unchange	down-unchange
RchiOBHmChr3g0463911	RchiOBHm_Chr3g0463911	Putative transcription factor WD40-like family	0.471	0.0015443	-1.0862	2.81127	down	-0.0950096	0.763701	0.117077	unchange	down-unchange
RchiOBHmChr3g0463941	RchiOBHm_Chr3g0463941	Putative acetyl-CoA carboxylase	0.488	0.00026206	-1.03505	3.5816	down	-0.477549	0.0342291	1.4656	unchange	down-unchange
RchiOBHmChr3g0464291	RchiOBHm_Chr3g0464291	Putative transferase, protein kinase RLK-Pelle-RLCK-XII-1 family	0.658	0.000157614	-0.603841	3.80241	down	-0.186768	0.497093	0.303562	unchange	down-unchange
RchiOBHmChr3g0465041	RchiOBHm_Chr3g0465041	Putative protein kinase Group-Pl-3 family	0.639	0.0077557	-0.646112	2.11038	down	-0.700027	0.00116454	2.93384	unchange	down-unchange
RchiOBHmChr3g0467101	RchiOBHm_Chr3g0467101	Putative Arf GTPase activating protein	0.45	0.0023163	-1.152	2.63521	down	-0.759971	0.000205666	3.68684	unchange	down-unchange
RchiOBHmChr3g0475021	RchiOBHm_Chr3g0475021	Putative peptidase M20	0.629	0.036384	-0.668868	1.43909	down	-0.500532	0.237241	0.624811	unchange	down-unchange
RchiOBHmChr3g0478811	RchiOBHm_Chr3g0478811	Putative RNA helicase	0.622	0.0038045	-0.685014	2.4197	down	-0.526149	0.0199422	1.70023	unchange	down-unchange
RchiOBHmChr3g0480691	RchiOBHm_Chr3g0480691	Putative transcription factor WD40-like family	0.46	0.027556	-1.12029	1.55978	down	0.381871	0.279045	0.554326	unchange	down-unchange
RchiOBHmChr3g0484331	RchiOBHm_Chr3g0484331	Putative transcription factor WD40-like family	0.648	0.00133572	-0.625934	2.87428	down	0.112829	0.732884	0.134965	unchange	down-unchange
RchiOBHmChr3g0485571	RchiOBHm_Chr3g0485571	Putative pyridoxal phosphatase	0.418	0.0054555	-1.25843	2.26317	down	0.0226023	0.954516	0.0202167	unchange	down-unchange
RchiOBHmChr3g0487091	RchiOBHm_Chr3g0487091	Putative long-chain-fatty-acid--CoA ligase	0.663	0.0123601	-0.592919	1.90798	down	0.00124381	0.99537	0.00201526	unchange	down-unchange
RchiOBHmChr3g0487771	RchiOBHm_Chr3g0487771	Putative transcription factor ARF family	0.433	0.00059546	-1.20756	3.22515	down	-0.431132	0.0569004	1.24489	unchange	down-unchange
RchiOBHmChr4g0384941	RchiOBHm_Chr4g0384941	Putative SH3 domain-containing protein	0.561	0.003076	-0.833927	2.51201	down	-0.818273	6.42e-05	4.19246	unchange	down-unchange
RchiOBHmChr4g0387781	RchiOBHm_Chr4g0387781	Putative dymeclin	0.632	0.03168	-0.662004	1.49921	down	-0.283328	0.271691	0.565924	unchange	down-unchange
RchiOBHmChr4g0388821	RchiOBHm_Chr4g0388821	RNA polymerase II transcription elongation factor DSIF/SUPT5H/SPT5 (ISS) [Ostreococcus tauri]	0.463	0.0169983	-1.11092	1.76959	down	0.165924	0.822561	0.084832	unchange	down-unchange
RchiOBHmChr4g0393651	RchiOBHm_Chr4g0393651	transmembrane protein [Arabidopsis thaliana]	0.575	0.0193445	-0.798366	1.71344	down	0.0755432	0.825184	0.0834492	unchange	down-unchange
RchiOBHmChr4g0393671	RchiOBHm_Chr4g0393671	Putative protein kinase CK1-CK1 family	0.219	0.0051797	-2.191	2.2857	down	-0.28169	0.242991	0.61441	unchange	down-unchange
RchiOBHmChr4g0396341	RchiOBHm_Chr4g0396341	PREDICTED: FK506-binding protein 5-like isoform X1 [Gossypium hirsutum]	0.64	0.0117966	-0.643856	1.92824	down	-0.794113	0.000444973	3.35167	unchange	down-unchange
RchiOBHmChr4g0403321	RchiOBHm_Chr4g0403321	Putative protein kinase TKL-Pl-6 family	0.252	0.0006794	-1.9885	3.16787	down	-0.208056	0.438011	0.358515	unchange	down-unchange
RchiOBHmChr4g0405181	RchiOBHm_Chr4g0405181	Putative 43kDa postsynaptic protein	0.576	0.01464	-0.795859	1.83446	down	-0.313337	0.229127	0.639923	unchange	down-unchange
RchiOBHmChr4g0408181	RchiOBHm_Chr4g0408181	PREDICTED: LOW QUALITY PROTEIN: probable isoleucine--tRNA ligase, cytoplasmic [Fragaria vesca subsp.vesca]	0.653	6.249e-05	-0.614845	4.20419	down	0.435585	0.0546282	1.26258	unchange	down-unchange
RchiOBHmChr4g0409551	RchiOBHm_Chr4g0409551	Putative glycoside hydrolase, family 19, catalytic, Lysozyme-like domain-containing protein	0.469	1.53394e-05	-1.09234	4.81419	down	-0.19406	0.491811	0.308202	unchange	down-unchange
RchiOBHmChr4g0411331	RchiOBHm_Chr4g0411331	Putative phosphoglucan, water dikinase	0.512	0.020338	-0.965784	1.69169	down	0.244651	0.297821	0.526045	unchange	down-unchange
RchiOBHmChr4g0412141	RchiOBHm_Chr4g0412141	Putative RNA-directed RNA polymerase	0.382	0.0020169	-1.38836	2.69532	down	0.690967	0.00184605	2.73376	unchange	down-unchange
RchiOBHmChr4g0412531	RchiOBHm_Chr4g0412531	Putative transcription factor C2H2 family	0.644	0.0054166	-0.634867	2.26627	down	0.529092	0.025794	1.58848	unchange	down-unchange
RchiOBHmChr4g0413361	RchiOBHm_Chr4g0413361	Putative exostosin	0.275	0.0168812	-1.8625	1.7726	down	0.44629	0.134264	0.872039	unchange	down-unchange
RchiOBHmChr4g0416831	RchiOBHm_Chr4g0416831	Putative carboxylesterase, 2-hydroxyisoflavanone dehydratase	0.289	0.0021371	-1.79086	2.67018	down	0.461576	0.504441	0.29719	unchange	down-unchange
RchiOBHmChr4g0419721	RchiOBHm_Chr4g0419721	Putative translation elongation factor EF1B/ribosomal protein S6	0.619	0.0077222	-0.691989	2.11226	down	0.904884	6.7e-06	5.17393	unchange	down-unchange
RchiOBHmChr4g0421511	RchiOBHm_Chr4g0421511	Putative protein kinase RLK-Pelle-RLCK-IXa family	0.506	0.0072774	-0.982791	2.13802	down	-0.986573	0.0350026	1.4559	unchange	down-unchange
RchiOBHmChr4g0422251	RchiOBHm_Chr4g0422251	Putative xyloglucan 6-xylosyltransferase	0.605	0.0026634	-0.724993	2.57456	down	NA	NA	NA	unchange	down-unchange
RchiOBHmChr4g0424121	RchiOBHm_Chr4g0424121	Putative START-like domain, Bet v I type allergen	0.644	0.0051995	-0.634867	2.28404	down	NA	NA	NA	unchange	down-unchange
RchiOBHmChr4g0424501	RchiOBHm_Chr4g0424501	Putative PH domain-containing protein	0.548	0.00047854	-0.867752	3.32008	down	-0.330764	0.157836	0.801794	unchange	down-unchange
RchiOBHmChr4g0424861	RchiOBHm_Chr4g0424861	Putative aldehyde dehydrogenase (NAD(+))	0.605	0.0022843	-0.724993	2.64125	down	0.0609392	0.842954	0.0741959	unchange	down-unchange
RchiOBHmChr4g0425951	RchiOBHm_Chr4g0425951	Putative N-acetylneuraminate 7-O(or 9-O)-acetyltransferase	0.645	0.0027789	-0.632629	2.55613	down	0.0979378	0.743314	0.128828	unchange	down-unchange
RchiOBHmChr4g0428041	RchiOBHm_Chr4g0428041	Putative pectinacetylesterase/NOTUM	0.496	0.0103388	-1.01159	1.98553	down	0.0126581	0.986106	0.00607634	unchange	down-unchange
RchiOBHmChr4g0428991	RchiOBHm_Chr4g0428991	Putative Arf GTPase activating protein	0.597	0.00053896	-0.744197	3.26844	down	-0.114082	0.684398	0.164691	unchange	down-unchange
RchiOBHmChr4g0429091	RchiOBHm_Chr4g0429091	PREDICTED: coiled-coil domain-containing protein SCD2 [Fragaria vesca subsp. vesca]	0.171	0.00101592	-2.54793	2.99314	down	0.162318	0.531847	0.274213	unchange	down-unchange
RchiOBHmChr4g0429521	RchiOBHm_Chr4g0429521	Putative protein kinase RLK-Pelle-RLCK-VIIa-1 family	0.354	0.00111542	-1.49818	2.95256	down	0.0187609	0.978859	0.0092798	unchange	down-unchange
RchiOBHmChr4g0429561	RchiOBHm_Chr4g0429561	PREDICTED: formin-like protein 3 [Fragaria vesca subsp. vesca]	0.203	0.0109031	-2.30045	1.96245	down	NA	NA	NA	unchange	down-unchange
RchiOBHmChr4g0429961	RchiOBHm_Chr4g0429961	Putative transcription factor CG1-CAMTA family	0.42	0.0021768	-1.25154	2.66218	down	0.0754964	0.795872	0.099157	unchange	down-unchange
RchiOBHmChr4g0430161	RchiOBHm_Chr4g0430161	Putative bifunctional inhibitor/plant lipid transfer protein/seed storage helical	0.574	0.0140369	-0.800877	1.85273	down	0.00650449	0.973971	0.0114541	unchange	down-unchange
RchiOBHmChr4g0430281	RchiOBHm_Chr4g0430281	Putative rubber elongation factor	0.241	4.2304e-05	-2.05289	4.37362	down	-0.896024	1.51e-05	4.82102	unchange	down-unchange
RchiOBHmChr4g0430941	RchiOBHm_Chr4g0430941	Putative linoleate 13S-lipoxygenase	0.565	0.00035754	-0.823677	3.44668	down	0.990698	1.59e-06	5.7986	unchange	down-unchange
RchiOBHmChr4g0432081	RchiOBHm_Chr4g0432081	Putative very-long-chain 3-oxoacyl-CoA reductase	0.591	0.0138241	-0.75877	1.85936	down	0.456814	0.183593	0.736145	unchange	down-unchange
RchiOBHmChr4g0433691	RchiOBHm_Chr4g0433691	Putative microtubule-associated protein, MAP65/Ase1/PRC1	0.531	0.0050632	-0.913216	2.29557	down	-0.285926	0.216066	0.665413	unchange	down-unchange
RchiOBHmChr4g0433701	RchiOBHm_Chr4g0433701	Putative zinc/iron permease	0.503	4.1811e-05	-0.99137	4.37871	down	-0.779737	0.000288647	3.53963	unchange	down-unchange
RchiOBHmChr4g0434361	RchiOBHm_Chr4g0434361	Putative PB1 domain-containing protein	0.646	0.0098425	-0.630394	2.00689	down	-0.449398	0.0459404	1.33781	unchange	down-unchange
RchiOBHmChr4g0435241	RchiOBHm_Chr4g0435241	Putative oxidoreductase, Very-long-chain 3-oxoacyl-CoA synthase	0.636	0.00081761	-0.652901	3.08745	down	0.974082	0.090376	1.04395	unchange	down-unchange
RchiOBHmChr4g0435691	RchiOBHm_Chr4g0435691	Putative metallo-beta-lactamase	0.609	0.027778	-0.715486	1.5563	down	-0.13388	0.836386	0.0775934	unchange	down-unchange
RchiOBHmChr4g0437121	RchiOBHm_Chr4g0437121	Putative Heat shock protein Hsp90 family	0.423	0.0023425	-1.24127	2.63032	down	-0.810753	5.96e-05	4.22475	unchange	down-unchange
RchiOBHmChr4g0438711	RchiOBHm_Chr4g0438711	Putative non-specific serine/threonine protein kinase	0.637	0.0030791	-0.650635	2.51158	down	-0.0561288	0.799195	0.0973471	unchange	down-unchange
RchiOBHmChr4g0439011	RchiOBHm_Chr4g0439011	Putative translation elongation factor IF5A	0.438	0.0039351	-1.191	2.40504	down	0.314584	0.185665	0.731271	unchange	down-unchange
RchiOBHmChr4g0439831	RchiOBHm_Chr4g0439831	Putative apyrase	0.482	0.0033792	-1.05289	2.47119	down	-0.397064	0.0821875	1.08519	unchange	down-unchange
RchiOBHmChr4g0439921	RchiOBHm_Chr4g0439921	Putative S-adenosyl-L-methionine-dependent methyltransferase	0.583	0.00069678	-0.778432	3.1569	down	-0.106696	0.66929	0.174385	unchange	down-unchange
RchiOBHmChr4g0441371	RchiOBHm_Chr4g0441371	Putative mitogen-activated protein kinase CMGC-MAPK family	0.66	0.0052762	-0.599462	2.27768	down	-0.2825	0.242225	0.615782	unchange	down-unchange
RchiOBHmChr4g0442091	RchiOBHm_Chr4g0442091	Putative alpha-ketoglutarate-dependent dioxygenase AlkB	0.483	0.00067595	-1.0499	3.17009	down	0.441752	0.196795	0.705986	unchange	down-unchange
RchiOBHmChr4g0443021	RchiOBHm_Chr4g0443021	Putative microtubule-associated protein	0.562	0.0178951	-0.831358	1.74727	down	0.06927	0.811	0.090979	unchange	down-unchange
RchiOBHmChr4g0443891	RchiOBHm_Chr4g0443891	Putative transcription factor WD40-like family	0.333	0.0029584	-1.58641	2.52894	down	-0.269766	0.263158	0.579783	unchange	down-unchange
RchiOBHmChr4g0445281	RchiOBHm_Chr4g0445281	glycine-rich family protein [Populus trichocarpa]	0.581	0.0041819	-0.78339	2.37863	down	0.210081	0.421056	0.37566	unchange	down-unchange
RchiOBHmChr4g0445481	RchiOBHm_Chr4g0445481	Putative nonaspanin (TM9SF), major facilitator superfamily domain-containing protein	0.647	0.00041514	-0.628162	3.38181	down	0.0151774	0.960087	0.0176894	unchange	down-unchange
RchiOBHmChr4g0446441	RchiOBHm_Chr4g0446441	Putative delta(24)-sterol reductase	0.659	0.021878	-0.60165	1.65999	down	0.983946	1.46e-05	4.83565	unchange	down-unchange
RchiOBHmChr4g0446451	RchiOBHm_Chr4g0446451	Putative anamorsin, S-adenosyl-L-methionine-dependent methyltransferase	0.638	0.0077767	-0.648372	2.1092	down	-0.511275	0.0203872	1.69064	unchange	down-unchange
RchiOBHmChr4g0447201	RchiOBHm_Chr4g0447201	ribosomal RNA small subunit methyltransferase J [Arabidopsis thaliana]	0.481	0.0024792	-1.05589	2.60569	down	0.600326	0.0228935	1.64029	unchange	down-unchange
RchiOBHmChr4g0447211	RchiOBHm_Chr4g0447211	Putative lipoyl synthase	0.517	0.00099915	-0.951764	3.00037	down	-0.635457	0.0482047	1.31691	unchange	down-unchange
RchiOBHmChr5g0001511	RchiOBHm_Chr5g0001511	Putative ubiquitinyl hydrolase 1	0.443	0.0089584	-1.17462	2.04777	down	0.101853	0.750139	0.124858	unchange	down-unchange
RchiOBHmChr5g0003981	RchiOBHm_Chr5g0003981	Putative DnaJ domain-containing protein	0.44	0.032418	-1.18442	1.48921	down	-0.41184	0.068183	1.16632	unchange	down-unchange
RchiOBHmChr5g0006601	RchiOBHm_Chr5g0006601	Putative tetratricopeptide-like helical domain-containing protein	0.441	0.00070077	-1.18115	3.15442	down	0.190012	0.499256	0.301677	unchange	down-unchange
RchiOBHmChr5g0008301	RchiOBHm_Chr5g0008301	Putative DNA-directed RNA polymerase	0.636	0.0069555	-0.652901	2.15767	down	-0.318482	0.171734	0.765144	unchange	down-unchange
RchiOBHmChr5g0010051	RchiOBHm_Chr5g0010051	Putative NAD(+) diphosphatase	0.604	0.006623	-0.72738	2.17895	down	-0.252246	0.48966	0.310105	unchange	down-unchange
RchiOBHmChr5g0013961	RchiOBHm_Chr5g0013961	Putative lupus La protein	0.239	0.0138364	-2.06492	1.85898	down	0.117018	0.663518	0.178147	unchange	down-unchange
RchiOBHmChr5g0014221	RchiOBHm_Chr5g0014221	Putative microtubule-severing ATPase	0.628	0.0075428	-0.671164	2.12247	down	-0.0498369	0.89497	0.0481914	unchange	down-unchange
RchiOBHmChr5g0014761	RchiOBHm_Chr5g0014761	Putative protein kinase CAMK-CAMKL-CHK1 family	0.636	0.0127436	-0.652901	1.89471	down	-0.966748	2.23e-06	5.6517	unchange	down-unchange
RchiOBHmChr5g0014771	RchiOBHm_Chr5g0014771	Putative Zinc finger, C3HC	0.627	0.0187994	-0.673463	1.72586	down	-0.187102	0.473741	0.324459	unchange	down-unchange
RchiOBHmChr5g0016421	RchiOBHm_Chr5g0016421	Putative ribosome-binding ATPase YchF/Obg-like ATPase 1, Beta-grasp domain, TGS-like protein	0.585	0.02256	-0.773491	1.64666	down	0.0682183	0.827679	0.082138	unchange	down-unchange
RchiOBHmChr5g0019581	RchiOBHm_Chr5g0019581	Putative post-transcriptional gene silencing PAZ-Argonaute family	0.492	0.005642	-1.02327	2.24857	down	0.292557	0.244075	0.612477	unchange	down-unchange
RchiOBHmChr5g0020381	RchiOBHm_Chr5g0020381	Putative xylogalacturonan beta-1,3-xylosyltransferase	0.473	0.0003438	-1.08009	3.46369	down	0.296641	0.394156	0.404332	unchange	down-unchange
RchiOBHmChr5g0023141	RchiOBHm_Chr5g0023141	Putative Caspase-like domain-containing protein	0.557	0.0012616	-0.844251	2.89908	down	-0.204927	0.430195	0.366334	unchange	down-unchange
RchiOBHmChr5g0024161	RchiOBHm_Chr5g0024161	Putative protein kinase TKL-Pl-6 family	0.59	0.0068	-0.761213	2.16749	down	-0.295564	0.218411	0.660725	unchange	down-unchange
RchiOBHmChr5g0024291	RchiOBHm_Chr5g0024291	PREDICTED: dedicator of cytokinesis protein 6 [Fragaria vesca subsp. vesca]	0.361	0.00100167	-1.46993	2.99928	down	NA	NA	NA	unchange	down-unchange
RchiOBHmChr5g0026151	RchiOBHm_Chr5g0026151	Putative cyclin	0.602	0.0145847	-0.732165	1.8361	down	-0.215852	0.398431	0.399647	unchange	down-unchange
RchiOBHmChr5g0029381	RchiOBHm_Chr5g0029381	Putative alpha,alpha-trehalose-phosphate synthase (UDP-forming)	0.413	0.00084384	-1.27579	3.07374	down	-0.0648839	0.834701	0.0784689	unchange	down-unchange
RchiOBHmChr5g0032781	RchiOBHm_Chr5g0032781	Putative protein kinase STE-STE20-YSK family	0.491	0.02148	-1.02621	1.66797	down	-0.321463	0.18546	0.731749	unchange	down-unchange
RchiOBHmChr5g0034641	RchiOBHm_Chr5g0034641	fiber (DUF1218) [Arabidopsis thaliana]	0.666	0.024058	-0.586406	1.61874	down	0.39109	0.0832332	1.0797	unchange	down-unchange
RchiOBHmChr5g0034651	RchiOBHm_Chr5g0034651	COP1-interacting protein 7 [Populus trichocarpa]	0.422	0.00083513	-1.24469	3.07825	down	0.0889894	0.734489	0.134015	unchange	down-unchange
RchiOBHmChr5g0039651	RchiOBHm_Chr5g0039651	Putative calcium/calmodulin-dependent protein kinase CAMK-CDPK family	0.595	0.0047997	-0.749038	2.31879	down	0.0219445	0.97277	0.0119898	unchange	down-unchange
RchiOBHmChr5g0041521	RchiOBHm_Chr5g0041521	Putative GrpE nucleotide exchange factor, EF-Hand 1, calcium-binding protein	0.365	0.00084228	-1.45403	3.07454	down	0.121029	0.78404	0.105662	unchange	down-unchange
RchiOBHmChr5g0044701	RchiOBHm_Chr5g0044701	Putative ferredoxin [2Fe-2S], plant, Beta-grasp domain-containing protein	0.616	0.042463	-0.698998	1.37199	down	-0.344472	0.185971	0.730556	unchange	down-unchange
RchiOBHmChr5g0048201	RchiOBHm_Chr5g0048201	Putative protein kinase RLK-Pelle-LRR-IX family	0.562	0.047058	-0.831358	1.32737	down	-0.813912	7.42e-05	4.1296	unchange	down-unchange
RchiOBHmChr5g0052341	RchiOBHm_Chr5g0052341	Putative assimilatory sulfite reductase (ferredoxin)	0.646	0.0110774	-0.630394	1.95556	down	0.671199	0.00140537	2.85221	unchange	down-unchange
RchiOBHmChr5g0053031	RchiOBHm_Chr5g0053031	Putative RNA-binding motif protein	0.481	0.0086623	-1.05589	2.06237	down	-0.219011	0.37647	0.42427	unchange	down-unchange
RchiOBHmChr5g0057111	RchiOBHm_Chr5g0057111	Putative Snf7 family protein	0.613	0.023997	-0.706041	1.61984	down	-0.366848	0.149082	0.826574	unchange	down-unchange
RchiOBHmChr5g0057461	RchiOBHm_Chr5g0057461	Putative lysine methyltransferase, S-adenosyl-L-methionine-dependent methyltransferase	0.638	0.0132826	-0.648372	1.87672	down	0.565023	0.0851429	1.06985	unchange	down-unchange
RchiOBHmChr5g0059381	RchiOBHm_Chr5g0059381	Putative protein disulfide-isomerase	0.434	0.00171811	-1.20423	2.76495	down	0.0787534	0.81611	0.0882514	unchange	down-unchange
RchiOBHmChr5g0062081	RchiOBHm_Chr5g0062081	Putative plus-end-directed kinesin ATPase	0.257	0.000184998	-1.96016	3.73283	down	-0.660634	0.00389794	2.40916	unchange	down-unchange
RchiOBHmChr5g0068641	RchiOBHm_Chr5g0068641	Putative phosphomethylpyrimidine synthase	0.561	0.000138451	-0.833927	3.8587	down	-0.295217	0.432308	0.364207	unchange	down-unchange
RchiOBHmChr5g0068691	RchiOBHm_Chr5g0068691	Putative phosphomethylpyrimidine synthase	0.462	0.00110425	-1.11404	2.95693	down	NA	NA	NA	unchange	down-unchange
RchiOBHmChr5g0069871	RchiOBHm_Chr5g0069871	Putative ribosomal protein S18	0.64	0.00114175	-0.643856	2.94243	down	0.0398581	0.934441	0.0294479	unchange	down-unchange
RchiOBHmChr5g0070341	RchiOBHm_Chr5g0070341	Putative PH domain-containing protein	0.418	0.0117042	-1.25843	1.93166	down	0.380791	0.0981958	1.00791	unchange	down-unchange
RchiOBHmChr5g0073181	RchiOBHm_Chr5g0073181	Putative DNA helicase	0.615	0.0094822	-0.701342	2.02309	down	-0.563201	0.0102853	1.98778	unchange	down-unchange
RchiOBHmChr5g0074821	RchiOBHm_Chr5g0074821	Putative STAR protein, homodimerization region	0.635	0.0147415	-0.655172	1.83146	down	0.0719024	0.814811	0.0889432	unchange	down-unchange
RchiOBHmChr5g0075541	RchiOBHm_Chr5g0075541	Putative Heat shock protein Hsp90 family	0.333	0.00047557	-1.58641	3.32279	down	0.715409	0.00124399	2.90518	unchange	down-unchange
RchiOBHmChr5g0076481	RchiOBHm_Chr5g0076481	Putative WEB family protein	0.51	0.039936	-0.971431	1.39864	down	-0.1598	0.760703	0.118785	unchange	down-unchange
RchiOBHmChr5g0081531	RchiOBHm_Chr5g0081531	6,7-dimethyl-8-ribityllumazine synthase [Arabidopsis thaliana]	0.435	0.0153628	-1.20091	1.81353	down	0.217174	0.524176	0.280523	unchange	down-unchange
RchiOBHmChr5g0082811	RchiOBHm_Chr5g0082811	Putative RNA helicase	0.616	0.0023978	-0.698998	2.62019	down	-0.500153	0.0813934	1.08941	unchange	down-unchange
RchiOBHmChr5g0083931	RchiOBHm_Chr5g0083931	Putative YTH domain-containing protein	0.585	0.0037582	-0.773491	2.42502	down	0.736125	0.000572298	3.24238	unchange	down-unchange
RchiOBHmChr6g0244251	RchiOBHm_Chr6g0244251	Putative transcription factor interactor and regulator CCHC(Zn) family	0.591	0.00146135	-0.75877	2.83525	down	-0.742896	0.652227	0.185601	unchange	down-unchange
RchiOBHmChr6g0245611	RchiOBHm_Chr6g0245611	Putative ER lumen protein retaining receptor	0.331	0.023799	-1.5951	1.62344	down	-0.763182	0.000387143	3.41213	unchange	down-unchange
RchiOBHmChr6g0249441	RchiOBHm_Chr6g0249441	Putative DNA repair protein Rad52/59/22	0.614	0.039015	-0.703689	1.40877	down	-0.303102	0.473027	0.325114	unchange	down-unchange
RchiOBHmChr6g0249631	RchiOBHm_Chr6g0249631	Putative sucrose-phosphate synthase	0.664	0.026021	-0.590745	1.58468	down	-0.492166	0.0250274	1.60158	unchange	down-unchange
RchiOBHmChr6g0250411	RchiOBHm_Chr6g0250411	Putative dynamin GTPase	0.584	0.00076066	-0.77596	3.11881	down	-0.313799	0.178857	0.747495	unchange	down-unchange
RchiOBHmChr6g0251781	RchiOBHm_Chr6g0251781	Putative heavy metal-associated domain, HMA	0.615	0.02636	-0.701342	1.57905	down	0.221993	0.385065	0.414466	unchange	down-unchange
RchiOBHmChr6g0251951	RchiOBHm_Chr6g0251951	Putative aminoacyltransferase, E1 ubiquitin-activating enzyme	0.527	0.0099973	-0.924125	2.00012	down	-0.411605	0.0734876	1.13379	unchange	down-unchange
RchiOBHmChr6g0253531	RchiOBHm_Chr6g0253531	Putative transcription factor C2H2 family	0.6	0.0011595	-0.736966	2.93573	down	-0.205033	0.445962	0.350702	unchange	down-unchange
RchiOBHmChr6g0253651	RchiOBHm_Chr6g0253651	Putative EGF-like calcium-binding domain, PA domain, peptidase S1A, coagulation factor VII/IX/X/C/Z	0.379	0.00084498	-1.39973	3.07315	down	-0.21546	0.394086	0.404409	unchange	down-unchange
RchiOBHmChr6g0254181	RchiOBHm_Chr6g0254181	Putative 3-oxo-5-beta-steroid 4-dehydrogenase	0.664	0.00040294	-0.590745	3.39476	down	-0.988167	0.00822209	2.08502	unchange	down-unchange
RchiOBHmChr6g0258511	RchiOBHm_Chr6g0258511	plant/F17M5-140 protein [Medicago truncatula]	0.562	0.0047219	-0.831358	2.32588	down	0.189635	0.723266	0.140702	unchange	down-unchange
RchiOBHmChr6g0259041	RchiOBHm_Chr6g0259041	Putative peptidylprolyl isomerase	0.503	0.020864	-0.99137	1.6806	down	0.503806	0.0915548	1.03832	unchange	down-unchange
RchiOBHmChr6g0259521	RchiOBHm_Chr6g0259521	Putative oxoglutarate/iron-dependent dioxygenase, non-heme dioxygenase domain-containing protein	0.526	0.0050003	-0.926865	2.301	down	-0.157151	0.656861	0.182527	unchange	down-unchange
RchiOBHmChr6g0259571	RchiOBHm_Chr6g0259571	BAT2 domain protein [Arabidopsis thaliana]	0.352	0.00115902	-1.50635	2.93591	down	-0.522916	0.0359986	1.44371	unchange	down-unchange
RchiOBHmChr6g0259581	RchiOBHm_Chr6g0259581	PREDICTED: protein FAM114A2-like isoform X2 [Nicotiana attenuata]	0.335	0.0092621	-1.57777	2.03329	down	-0.595386	0.00972987	2.01189	unchange	down-unchange
RchiOBHmChr6g0264491	RchiOBHm_Chr6g0264491	Putative nucleotide-binding alpha-beta plait domain-containing protein	0.45	0.036178	-1.152	1.44156	down	-0.406411	0.457318	0.339782	unchange	down-unchange
RchiOBHmChr6g0266041	RchiOBHm_Chr6g0266041	Putative NAD(P)-binding domain, ubiquitin/SUMO-activating enzyme ubiquitin-like protein	0.632	0.0066403	-0.662004	2.17781	down	-0.211671	0.389106	0.409932	unchange	down-unchange
RchiOBHmChr6g0268371	RchiOBHm_Chr6g0268371	PREDICTED: tRNA-dihydrouridine(47) synthase [NAD(P)(+)]-like [Fragaria vesca subsp. vesca]	0.504	0.039402	-0.988504	1.40448	down	0.556108	0.0270696	1.56752	unchange	down-unchange
RchiOBHmChr6g0269431	RchiOBHm_Chr6g0269431	Putative P-loop containing nucleoside triphosphate hydrolase, leucine-rich repeat domain, L	0.466	0.031644	-1.1016	1.49971	down	NA	NA	NA	unchange	down-unchange
RchiOBHmChr6g0271831	RchiOBHm_Chr6g0271831	Putative potassium transporter	0.562	0.0043007	-0.831358	2.36646	down	-0.632167	0.00384055	2.41561	unchange	down-unchange
RchiOBHmChr6g0279181	RchiOBHm_Chr6g0279181	Putative geranylgeranyl diphosphate synthase	0.401	0.00119597	-1.31833	2.92228	down	-0.0734279	0.811265	0.0908375	unchange	down-unchange
RchiOBHmChr6g0280151	RchiOBHm_Chr6g0280151	Putative glycerol-3-phosphate 1-O-acyltransferase	0.388	0.044776	-1.36587	1.34895	down	-0.106303	0.763261	0.117327	unchange	down-unchange
RchiOBHmChr6g0280871	RchiOBHm_Chr6g0280871	Putative EF-hand domain pair protein	0.385	0.00067745	-1.37707	3.16912	down	-0.355603	0.165557	0.781052	unchange	down-unchange
RchiOBHmChr6g0281551	RchiOBHm_Chr6g0281551	Putative transcription factor & chromatin remodeling ARID family	0.391	0.015918	-1.35476	1.79811	down	0.123983	0.668915	0.174629	unchange	down-unchange
RchiOBHmChr6g0283541	RchiOBHm_Chr6g0283541	Putative peptidylprolyl isomerase	0.583	0.047783	-0.778432	1.32073	down	0.855991	2e-05	4.69897	unchange	down-unchange
RchiOBHmChr6g0283991	RchiOBHm_Chr6g0283991	Putative polygalacturonate 4-alpha-galacturonosyltransferase	0.657	0.0037822	-0.606035	2.42226	down	-0.226227	0.359194	0.444671	unchange	down-unchange
RchiOBHmChr6g0284101	RchiOBHm_Chr6g0284101	Putative transcription factor interactor and regulator FHA-SMAD family	0.321	0.045821	-1.63935	1.33894	down	-0.13715	0.663073	0.178439	unchange	down-unchange
RchiOBHmChr6g0285131	RchiOBHm_Chr6g0285131	Putative DNA/RNA-binding protein Alba	0.618	0.041516	-0.694321	1.38178	down	0.345209	0.159214	0.798019	unchange	down-unchange
RchiOBHmChr6g0286091	RchiOBHm_Chr6g0286091	Putative transcription factor WD40-like family	0.578	0.00177505	-0.790859	2.75079	down	-0.0510353	0.840516	0.0754542	unchange	down-unchange
RchiOBHmChr6g0286491	RchiOBHm_Chr6g0286491	Putative exostosin	0.369	0.00021811	-1.43831	3.66132	down	-0.58317	0.00593175	2.22682	unchange	down-unchange
RchiOBHmChr6g0287291	RchiOBHm_Chr6g0287291	Putative phospholipid:diacylglycerol acyltransferase	0.513	0.021176	-0.962969	1.67416	down	-0.647429	0.00612577	2.21284	unchange	down-unchange
RchiOBHmChr6g0288111	RchiOBHm_Chr6g0288111	Putative NTF2-like domain-containing protein	0.64	0.00136059	-0.643856	2.86627	down	0.46396	0.123497	0.908345	unchange	down-unchange
RchiOBHmChr6g0289661	RchiOBHm_Chr6g0289661	Putative guanylate-binding protein	0.634	0.00152294	-0.657445	2.81732	down	-0.188845	0.526102	0.27893	unchange	down-unchange
RchiOBHmChr6g0291251	RchiOBHm_Chr6g0291251	Putative small nuclear ribonucleoprotein D1	0.589	0.040301	-0.76366	1.39468	down	0.491222	0.0383801	1.41589	unchange	down-unchange
RchiOBHmChr6g0293731	RchiOBHm_Chr6g0293731	Putative like-Sm (LSM) domain containing protein, LSm4/SmD1/SmD3	0.632	0.044824	-0.662004	1.34849	down	-0.375747	0.117448	0.930153	unchange	down-unchange
RchiOBHmChr6g0294961	RchiOBHm_Chr6g0294961	Putative thaumatin	0.552	0.00085673	-0.85726	3.06716	down	NA	NA	NA	unchange	down-unchange
RchiOBHmChr6g0296071	RchiOBHm_Chr6g0296071	Putative peptidase M20	0.37	0.0066634	-1.4344	2.1763	down	-0.0789198	0.863529	0.0637232	unchange	down-unchange
RchiOBHmChr6g0297851	RchiOBHm_Chr6g0297851	Putative ANTH domain-containing protein	0.382	0.00024431	-1.38836	3.61206	down	-0.365375	0.0996362	1.00158	unchange	down-unchange
RchiOBHmChr6g0297861	RchiOBHm_Chr6g0297861	Putative oxidoreductase	0.598	0.049183	-0.741783	1.30818	down	0.0183203	0.959548	0.0179332	unchange	down-unchange
RchiOBHmChr6g0298221	RchiOBHm_Chr6g0298221	Putative cellulose synthase (UDP-forming) chromatin regulator PHD family	0.347	0.0003765	-1.52699	3.42424	down	-0.0635313	0.842628	0.0743643	unchange	down-unchange
RchiOBHmChr6g0299371	RchiOBHm_Chr6g0299371	Putative nucleoid-associated protein YbaB/EbfC family	0.65	0.00089748	-0.621488	3.04698	down	-0.432394	0.0889912	1.05065	unchange	down-unchange
RchiOBHmChr6g0299541	RchiOBHm_Chr6g0299541	Putative transcription factor WD40-like family	0.662	0.028083	-0.595097	1.55156	down	0.00515109	0.990517	0.00413796	unchange	down-unchange
RchiOBHmChr6g0300281	RchiOBHm_Chr6g0300281	Putative exocyst complex component Sec3	0.657	0.00043991	-0.606035	3.35664	down	-0.350301	0.137632	0.86128	unchange	down-unchange
RchiOBHmChr6g0302151	RchiOBHm_Chr6g0302151	Putative 43kDa postsynaptic protein	0.649	0.00035913	-0.62371	3.44475	down	-0.0938967	0.74575	0.127407	unchange	down-unchange
RchiOBHmChr6g0302451	RchiOBHm_Chr6g0302451	Putative IQ motif, EF-hand binding protein	0.507	0.00117645	-0.979942	2.92943	down	-0.827786	4.76e-05	4.32239	unchange	down-unchange
RchiOBHmChr6g0302531	RchiOBHm_Chr6g0302531	Putative S-adenosyl-L-methionine-dependent methyltransferase	0.431	0.00081977	-1.21424	3.08631	down	0.531887	0.0440188	1.35636	unchange	down-unchange
RchiOBHmChr6g0303071	RchiOBHm_Chr6g0303071	Putative Heat shock protein Hsp90 family	0.642	0.029256	-0.639355	1.53379	down	0.200069	0.446645	0.350038	unchange	down-unchange
RchiOBHmChr6g0303161	RchiOBHm_Chr6g0303161	Putative C2 domain, synaptotagmin-like mitochondrial-lipid-binding domain-containing protein	0.572	0.0046218	-0.805913	2.33519	down	-0.833909	2.56e-05	4.59176	unchange	down-unchange
RchiOBHmChr6g0304271	RchiOBHm_Chr6g0304271	Putative carboxypeptidase A	0.645	0.0095	-0.632629	2.02228	down	-0.445148	0.0665065	1.17714	unchange	down-unchange
RchiOBHmChr6g0304771	RchiOBHm_Chr6g0304771	Putative very-long-chain 3-oxoacyl-CoA synthase	0.615	0.00156244	-0.701342	2.8062	down	0.555347	0.384848	0.41471	unchange	down-unchange
RchiOBHmChr6g0304851	RchiOBHm_Chr6g0304851	Putative protein-synthesizing GTPase	0.296	0.032895	-1.75633	1.48287	down	-0.376159	0.0984073	1.00697	unchange	down-unchange
RchiOBHmChr6g0304911	RchiOBHm_Chr6g0304911	Putative peroxidase	0.588	0.0020413	-0.766112	2.69009	down	-0.122312	0.744648	0.128049	unchange	down-unchange
RchiOBHmChr6g0305511	RchiOBHm_Chr6g0305511	Putative cadmium-transporting ATPase	0.539	0.04454	-0.891643	1.35125	down	-0.163557	0.533844	0.272586	unchange	down-unchange
RchiOBHmChr6g0307991	RchiOBHm_Chr6g0307991	Putative protein kinase AGC-NDR family	0.523	0.003261	-0.935117	2.48665	down	-0.5226	0.0820095	1.08614	unchange	down-unchange
RchiOBHmChr6g0309651	RchiOBHm_Chr6g0309651	PREDICTED: A-kinase anchor protein 17B [Pyrus x bretschneideri]	0.305	0.00025564	-1.71312	3.59237	down	-0.118899	0.674931	0.170741	unchange	down-unchange
RchiOBHmChr6g0310891	RchiOBHm_Chr6g0310891	Putative protein kinase TKL-CTR1-DRK-2 family	0.621	0.039665	-0.687335	1.40159	down	-0.633056	0.0028484	2.5454	unchange	down-unchange
RchiOBHmChr6g0312201	RchiOBHm_Chr6g0312201	Putative plastid lipid-associated protein/fibrillin	0.658	0.0096838	-0.603841	2.01395	down	0.93625	0.00347511	2.45903	unchange	down-unchange
RchiOBHmChr7g0177061	RchiOBHm_Chr7g0177061	Putative oligopeptide transporter, OPT superfamily	0.423	0.0012031	-1.24127	2.9197	down	-0.446352	0.051937	1.28452	unchange	down-unchange
RchiOBHmChr7g0178111	RchiOBHm_Chr7g0178111	Putative thioredoxin-like, acetyltransferase A, auxiliary subunit	0.655	0.00155736	-0.610433	2.80761	down	-0.480341	0.0291473	1.5354	unchange	down-unchange
RchiOBHmChr7g0179361	RchiOBHm_Chr7g0179361	Putative PB1 domain-containing protein	0.573	0.039485	-0.803393	1.40357	down	0.2302	0.414041	0.382957	unchange	down-unchange
RchiOBHmChr7g0180121	RchiOBHm_Chr7g0180121	Putative transcription factor bHLH family	0.318	0.00158262	-1.6529	2.80062	down	-0.591449	0.00930171	2.03144	unchange	down-unchange
RchiOBHmChr7g0180391	RchiOBHm_Chr7g0180391	Putative protein kinase CAMK-CDPK family	0.523	0.00067979	-0.935117	3.16763	down	-0.310283	0.173643	0.760343	unchange	down-unchange
RchiOBHmChr7g0181131	RchiOBHm_Chr7g0181131	Putative S-adenosyl-L-methionine-dependent methyltransferase	0.429	0.00074227	-1.22095	3.12944	down	-0.40011	0.0968757	1.01378	unchange	down-unchange
RchiOBHmChr7g0181841	RchiOBHm_Chr7g0181841	Putative protein-disulfide reductase	0.615	0.002858	-0.701342	2.54394	down	0.129717	0.648814	0.18788	unchange	down-unchange
RchiOBHmChr7g0181981	RchiOBHm_Chr7g0181981	Putative ribonuclease H-like domain-containing protein	0.526	0.025456	-0.926865	1.59421	down	0.319555	0.38558	0.413886	unchange	down-unchange
RchiOBHmChr7g0182111	RchiOBHm_Chr7g0182111	Putative xyloglucan 6-xylosyltransferase	0.535	0.00061513	-0.902389	3.21103	down	-0.20774	0.419047	0.377738	unchange	down-unchange
RchiOBHmChr7g0182871	RchiOBHm_Chr7g0182871	Putative ClpA/B family, P-loop containing nucleoside triphosphate hydrolase	0.648	0.0046391	-0.625934	2.33357	down	0.0575759	0.861018	0.0649877	unchange	down-unchange
RchiOBHmChr7g0183211	RchiOBHm_Chr7g0183211	Putative nucleotide-binding alpha-beta plait domain, nuclear transport factor 2, NTF2-like protein	0.655	0.0079036	-0.610433	2.10218	down	-0.147711	0.605648	0.21778	unchange	down-unchange
RchiOBHmChr7g0184861	RchiOBHm_Chr7g0184861	PREDICTED: protein CASP [Fragaria vesca subsp. vesca]	0.504	0.00081796	-0.988504	3.08727	down	-0.422194	0.0545201	1.26344	unchange	down-unchange
RchiOBHmChr7g0186201	RchiOBHm_Chr7g0186201	Putative acetyltransferase A, auxiliary subunit	0.613	0.00068462	-0.706041	3.16455	down	-0.692732	0.000728397	3.13763	unchange	down-unchange
RchiOBHmChr7g0186301	RchiOBHm_Chr7g0186301	Putative Heat shock protein 70 family	0.376	0.00196469	-1.4112	2.70671	down	-0.387009	0.0976914	1.01014	unchange	down-unchange
RchiOBHmChr7g0186731	RchiOBHm_Chr7g0186731	Putative structural maintenance of chromosomes protein	0.325	0.0179189	-1.62149	1.74669	down	-0.208962	0.863833	0.0635705	unchange	down-unchange
RchiOBHmChr7g0186901	RchiOBHm_Chr7g0186901	DUF538 family protein (Protein of unknown function, DUF538) [Arabidopsis thaliana]	0.504	0.0054552	-0.988504	2.26319	down	-0.279202	0.292325	0.534134	unchange	down-unchange
RchiOBHmChr7g0187871	RchiOBHm_Chr7g0187871	Putative transcription factor NAM family	0.335	0.0054039	-1.57777	2.26729	down	-0.121629	0.663073	0.178439	unchange	down-unchange
RchiOBHmChr7g0187991	RchiOBHm_Chr7g0187991	Putative ribosomal protein L6	0.588	0.0080835	-0.766112	2.0924	down	0.214739	0.41755	0.379291	unchange	down-unchange
RchiOBHmChr7g0188141	RchiOBHm_Chr7g0188141	Putative S-adenosyl-L-methionine-dependent methyltransferase	0.529	0.0023351	-0.91866	2.63169	down	0.928098	3.86e-06	5.41341	unchange	down-unchange
RchiOBHmChr7g0188331	RchiOBHm_Chr7g0188331	Putative micrococcal nuclease	0.463	0.0004999	-1.11092	3.30112	down	-0.637685	0.00297793	2.52609	unchange	down-unchange
RchiOBHmChr7g0188351	RchiOBHm_Chr7g0188351	Putative calreticulin/calnexin, concanavalin A-like lectin/glucanase domain-containing protein	0.55	0.0071381	-0.862496	2.14642	down	-0.239435	0.33539	0.474449	unchange	down-unchange
RchiOBHmChr7g0191371	RchiOBHm_Chr7g0191371	Putative sinapine esterase	0.538	0.0028391	-0.894322	2.54682	down	0.825198	0.0666793	1.17601	unchange	down-unchange
RchiOBHmChr7g0194221	RchiOBHm_Chr7g0194221	Putative peptidase M41, ATPase, AAA-type, core, P-loop containing nucleoside triphosphate hydrolase	0.476	3.539e-05	-1.07097	4.45112	down	0.704999	0.0041447	2.38251	unchange	down-unchange
RchiOBHmChr7g0194991	RchiOBHm_Chr7g0194991	Putative cellulase	0.221	0.005755	-2.17788	2.23995	down	-0.696334	0.213943	0.669701	unchange	down-unchange
RchiOBHmChr7g0195291	RchiOBHm_Chr7g0195291	Putative hydroquinone glucosyltransferase	0.445	0.022562	-1.16812	1.64662	down	-0.161144	0.714764	0.145838	unchange	down-unchange
RchiOBHmChr7g0195391	RchiOBHm_Chr7g0195391	Putative PMR5 domain, PC-Esterase	0.528	1.98959e-05	-0.92139	4.70124	down	0.204785	0.466988	0.330694	unchange	down-unchange
RchiOBHmChr7g0195451	RchiOBHm_Chr7g0195451	Putative tetratricopeptide-like helical domain-containing protein	0.384	0.0149816	-1.38082	1.82444	down	0.0400313	0.920986	0.035747	unchange	down-unchange
RchiOBHmChr7g0197651	RchiOBHm_Chr7g0197651	Putative minus-end-directed kinesin ATPase	0.578	0.00096187	-0.790859	3.01688	down	-1.71729	0.248751	0.604235	unchange	down-unchange
RchiOBHmChr7g0200251	RchiOBHm_Chr7g0200251	Putative geraniol 8-hydroxylase	0.445	0.0098368	-1.16812	2.00715	down	NA	NA	NA	unchange	down-unchange
RchiOBHmChr7g0202041	RchiOBHm_Chr7g0202041	Putative Heat shock chaperonin-binding, acetyltransferase A, auxiliary subunit	0.385	0.032862	-1.37707	1.48331	down	-0.245433	0.300982	0.52146	unchange	down-unchange
RchiOBHmChr7g0202131	RchiOBHm_Chr7g0202131	Putative 43kDa postsynaptic protein	0.535	0.0016448	-0.902389	2.78389	down	-0.237573	0.310725	0.507624	unchange	down-unchange
RchiOBHmChr7g0204831	RchiOBHm_Chr7g0204831	Putative hyaluronan/mRNA-binding protein	0.454	0.020137	-1.13924	1.69601	down	0.190808	0.4787	0.319937	unchange	down-unchange
RchiOBHmChr7g0208361	RchiOBHm_Chr7g0208361	Putative S-adenosyl-L-methionine-dependent methyltransferase	0.475	0.0057168	-1.074	2.24285	down	0.0538692	0.896571	0.0474152	unchange	down-unchange
RchiOBHmChr7g0209771	RchiOBHm_Chr7g0209771	Putative Arf GTPase activating protein	0.662	0.04336	-0.595097	1.36291	down	-0.66803	0.00144483	2.84018	unchange	down-unchange
RchiOBHmChr7g0211361	RchiOBHm_Chr7g0211361	Putative glycosylphosphatidylinositol-mannosyltransferase I, PIG-X/PBN1	0.639	0.0051181	-0.646112	2.29089	down	-0.202045	0.678754	0.168288	unchange	down-unchange
RchiOBHmChr7g0211981	RchiOBHm_Chr7g0211981	Putative eukaryotic translation initiation factor 3 subunit J	0.452	0.00109507	-1.14561	2.96056	down	-0.106891	0.667185	0.175754	unchange	down-unchange
RchiOBHmChr7g0212781	RchiOBHm_Chr7g0212781	PREDICTED: secretory carrier-associated membrane protein 4 isoform X1 [Fragaria vesca subsp. vesca]	0.633	0.033123	-0.659723	1.47987	down	-0.164009	0.553183	0.257131	unchange	down-unchange
RchiOBHmChr7g0213191	RchiOBHm_Chr7g0213191	Putative protein ENHANCED DISEASE RESISTANCE 2, PH domain, START	0.488	0.00061911	-1.03505	3.20823	down	-0.782925	0.000220063	3.65745	unchange	down-unchange
RchiOBHmChr7g0215891	RchiOBHm_Chr7g0215891	Putative EH domain, parvalbumin	0.502	0.0034834	-0.994241	2.458	down	-0.454351	0.0371617	1.4299	unchange	down-unchange
RchiOBHmChr7g0216321	RchiOBHm_Chr7g0216321	zinc finger/BTB domain protein [Arabidopsis thaliana]	0.524	0.00091933	-0.932361	3.03653	down	0.553024	0.0274114	1.56207	unchange	down-unchange
RchiOBHmChr7g0216501	RchiOBHm_Chr7g0216501	Putative major facilitator, sugar transporter, major facilitator superfamily	0.472	2.0377e-05	-1.08314	4.69086	down	-0.216769	0.437149	0.35937	unchange	down-unchange
RchiOBHmChr7g0217741	RchiOBHm_Chr7g0217741	Putative cellulose synthase (UDP-forming) chromatin regulator PHD family	0.266	0.0053042	-1.9105	2.27538	down	-0.206782	0.428002	0.368554	unchange	down-unchange
RchiOBHmChr7g0217751	RchiOBHm_Chr7g0217751	Putative UVR domain-containing protein	0.666	0.0075634	-0.586406	2.12128	down	-0.237585	0.356615	0.4478	unchange	down-unchange
RchiOBHmChr7g0218131	RchiOBHm_Chr7g0218131	Putative cellulase	0.233	0.0047245	-2.1016	2.32564	down	-0.450158	0.24156	0.616975	unchange	down-unchange
RchiOBHmChr7g0220411	RchiOBHm_Chr7g0220411	Elongation factor 1-gamma	0.651	0.0029792	-0.619271	2.5259	down	0.0631695	0.844405	0.0734494	unchange	down-unchange
RchiOBHmChr7g0220701	RchiOBHm_Chr7g0220701	DUF1682 family protein [Medicago truncatula]	0.558	0.00053797	-0.841663	3.26924	down	-0.0257153	0.929521	0.0317407	unchange	down-unchange
RchiOBHmChr7g0222671	RchiOBHm_Chr7g0222671	PREDICTED: protein RETICULATA-RELATED 1, chloroplastic [Prunus mume]	0.448	0.033558	-1.15843	1.4742	down	0.00519787	0.999674	0.000141789	unchange	down-unchange
RchiOBHmChr7g0224281	RchiOBHm_Chr7g0224281	Putative dolichyl-P-Glc:Man(9)GlcNAc(2)-PP-dolichol alpha-1,3-glucosyltransferase	0.494	0.00153904	-1.01742	2.81275	down	-0.110579	0.723787	0.140389	unchange	down-unchange
RchiOBHmChr7g0227121	RchiOBHm_Chr7g0227121	Putative ornithine decarboxylase	0.587	0.0053197	-0.768568	2.27411	down	NA	NA	NA	unchange	down-unchange
RchiOBHmChr7g0230191	RchiOBHm_Chr7g0230191	Putative glutathione transferase	0.367	0.0025038	-1.44615	2.6014	down	0.447499	0.078338	1.10603	unchange	down-unchange
RchiOBHmChr7g0230261	RchiOBHm_Chr7g0230261	Putative 12-oxophytodienoate reductase	0.416	0.047862	-1.26534	1.32001	down	0.179005	0.617436	0.209408	unchange	down-unchange
RchiOBHmChr7g0232321	RchiOBHm_Chr7g0232321	Putative K domain-containing protein	0.647	0.036037	-0.628162	1.44325	down	0.30256	0.286357	0.543092	unchange	down-unchange
RchiOBHmChr7g0233221	RchiOBHm_Chr7g0233221	Putative PB1 domain-containing protein	0.646	0.018102	-0.630394	1.74227	down	-0.337716	0.143975	0.841714	unchange	down-unchange
RchiOBHmChr7g0236781	RchiOBHm_Chr7g0236781	Putative Ulp1 peptidase	0.441	0.0213	-1.18115	1.67162	down	0.228037	0.41946	0.37731	unchange	down-unchange
RchiOBHmChr7g0237521	RchiOBHm_Chr7g0237521	Putative transcription factor WD40-like family	0.411	0.044481	-1.28279	1.35183	down	-0.552635	0.0123035	1.90997	unchange	down-unchange
RchiOBHmChr7g0239991	RchiOBHm_Chr7g0239991	Putative flavanone 3-dioxygenase	0.187	0.041019	-2.41889	1.38701	down	0.386929	0.431492	0.365027	unchange	down-unchange
RchiOBHmChr7g0240701	RchiOBHm_Chr7g0240701	Putative translation initiation factor IF2/IF5	0.618	0.0029202	-0.694321	2.53459	down	-0.376434	0.104036	0.982815	unchange	down-unchange
RchiOBHmChr7g0241831	RchiOBHm_Chr7g0241831	Putative chaperone DnaJ	0.65	0.031079	-0.621488	1.50753	down	-0.0200648	0.94155	0.0261566	unchange	down-unchange
RchiOBHmChr7g0243891	RchiOBHm_Chr7g0243891	Putative sarcosine/dimethylglycine N-methyltransferase	0.457	0.00061768	-1.12973	3.20924	down	-0.872495	2.98e-05	4.52578	unchange	down-unchange

## Sheet: cluster 3
Transcription.ID	Protein.accession	Protein.description	Ratio	P.value	log2FC.x	log10p.x	Regulation.x	log2FC.y	FDR	log10p.y	Regulation.y	type
RchiOBHmChr1g0377941	RchiOBHm_Chr1g0377941	Putative quinate O-hydroxycinnamoyltransferase	0.506	0.0022235	-0.982791	2.65296	down	1.18591	0.00148538	2.82816	up	down-up
RchiOBHmChr2g0084791	RchiOBHm_Chr2g0084791	Putative protein kinase TKL-Pl-5 family	0.539	0.036295	-0.891643	1.44015	down	1.23654	9.37e-10	9.02826	up	down-up
RchiOBHmChr2g0117361	RchiOBHm_Chr2g0117361	Putative tetratricopeptide-like helical domain-containing protein	0.274	0.0062418	-1.86775	2.20469	down	1.09101	0.00189944	2.72138	up	down-up
RchiOBHmChr2g0156661	RchiOBHm_Chr2g0156661	Putative Heat shock protein Hsp90 family	0.599	0.00086199	-0.739372	3.0645	down	1.06717	5.09e-07	6.29328	up	down-up
RchiOBHmChr2g0166331	RchiOBHm_Chr2g0166331	Putative glycogen phosphorylase	0.485	0.00178181	-1.04394	2.74914	down	2.35588	2.47e-13	12.6073	up	down-up
RchiOBHmChr2g0174941	RchiOBHm_Chr2g0174941	Putative protoporphyrinogen oxidase	0.509	0.0071359	-0.974262	2.14655	down	1.67567	4.99e-06	5.3019	up	down-up
RchiOBHmChr3g0464891	RchiOBHm_Chr3g0464891	PREDICTED: protein RETICULATA, chloroplastic [Prunus mume]	0.598	0.0027032	-0.741783	2.56812	down	1.25133	3.79e-06	5.42136	up	down-up
RchiOBHmChr4g0444701	RchiOBHm_Chr4g0444701	Putative peptidase M20	0.262	8.2594e-05	-1.93236	4.08305	down	3.75725	0.0156284	1.80609	up	down-up
RchiOBHmChr5g0002361	RchiOBHm_Chr5g0002361	Putative calcium-dependent channel, 7TM region phosphate	0.653	9.5053e-05	-0.614845	4.02203	down	1.10752	0.0228914	1.64033	up	down-up
RchiOBHmChr5g0007621	RchiOBHm_Chr5g0007621	Putative catechol oxidase	0.556	0.0140383	-0.846843	1.85269	down	1.93375	1.33e-05	4.87615	up	down-up
RchiOBHmChr5g0016431	RchiOBHm_Chr5g0016431	Putative protein kinase RLK-Pelle-LRR-III family	0.634	0.0035422	-0.657445	2.45073	down	1.31616	0.000754168	3.12253	up	down-up
RchiOBHmChr5g0018521	RchiOBHm_Chr5g0018521	Putative cytochrome P450	0.412	0.042318	-1.27928	1.37347	down	2.5921	6.41e-20	19.1931	up	down-up
RchiOBHmChr5g0036911	RchiOBHm_Chr5g0036911	PREDICTED: DAG protein, chloroplastic [Fragaria vesca subsp. vesca]	0.62	0.037596	-0.68966	1.42486	down	1.2558	2.67e-07	6.57349	up	down-up
RchiOBHmChr5g0049481	RchiOBHm_Chr5g0049481	Putative glucan 1,3-beta-glucosidase	0.666	0.031262	-0.586406	1.50498	down	1.6562	9.33e-14	13.0301	up	down-up
RchiOBHmChr5g0055441	RchiOBHm_Chr5g0055441	Putative glucomannan 4-beta-mannosyltransferase	0.181	0.00016272	-2.46594	3.78856	down	1.16863	4.91e-09	8.30892	up	down-up
RchiOBHmChr5g0081561	RchiOBHm_Chr5g0081561	Putative plant lipid transfer protein/Par allergen	0.613	0.0072847	-0.706041	2.13759	down	2.70489	2.26e-14	13.6459	up	down-up
RchiOBHmChr6g0255681	RchiOBHm_Chr6g0255681	Putative arylformamidase	0.464	0.042078	-1.1078	1.37594	down	1.07047	0.0357946	1.44618	up	down-up
RchiOBHmChr7g0179451	RchiOBHm_Chr7g0179451	Putative o-succinylbenzoate synthase	0.536	0.024017	-0.899695	1.61948	down	1.72882	5.2e-05	4.284	up	down-up

## Sheet: cluster 4
Transcription.ID	Protein.accession	Protein.description	Ratio	P.value	log2FC.x	log10p.x	Regulation.x	log2FC.y	FDR	log10p.y	Regulation.y	type
RchiOBHmChr1g0313211	RchiOBHm_Chr1g0313211	Putative EF-hand domain pair protein	1.009	0.98268	0.0129262	0.00758788	unchange	-1.30419	9.05e-08	7.04335	down	unchange-down
RchiOBHmChr1g0313711	RchiOBHm_Chr1g0313711	Putative glycosidase	NA	NA	NA	NA	unchange	-5.10521	1.81e-17	16.7423	down	unchange-down
RchiOBHmChr1g0313741	RchiOBHm_Chr1g0313741	Putative glycosidase	1.294	0.024099	0.371838	1.618	unchange	-2.27629	2.41e-22	21.618	down	unchange-down
RchiOBHmChr1g0317081	RchiOBHm_Chr1g0317081	Putative NIF system FeS cluster assembly, NifU	0.921	0.46228	-0.118727	0.335095	unchange	-1.21767	2.51e-07	6.60033	down	unchange-down
RchiOBHmChr1g0317111	RchiOBHm_Chr1g0317111	Putative sterol 24-C-methyltransferase	0.75	0.086359	-0.415037	1.06369	unchange	-2.20158	3.18e-29	28.4976	down	unchange-down
RchiOBHmChr1g0324511	RchiOBHm_Chr1g0324511	Putative START-like domain-containing protein	0.774	0.0115585	-0.369595	1.9371	unchange	-1.08339	0.0040394	2.39368	down	unchange-down
RchiOBHmChr1g0329881	RchiOBHm_Chr1g0329881	Putative carboxylesterase	1.234	0.036	0.303342	1.4437	unchange	-1.32658	3.48e-07	6.45842	down	unchange-down
RchiOBHmChr1g0330291	RchiOBHm_Chr1g0330291	Putative major facilitator superfamily	NA	NA	NA	NA	unchange	-1.07585	4.53e-06	5.3439	down	unchange-down
RchiOBHmChr1g0330991	RchiOBHm_Chr1g0330991	Putative pectinesterase	0.851	0.80312	-0.232769	0.0952196	unchange	-2.0134	4.86e-23	22.3134	down	unchange-down
RchiOBHmChr1g0331581	RchiOBHm_Chr1g0331581	Putative HSP20-like chaperone	NA	NA	NA	NA	unchange	-1.50921	0.0219882	1.65781	down	unchange-down
RchiOBHmChr1g0343301	RchiOBHm_Chr1g0343301	Putative aldehyde oxygenase (deformylating)	1.476	0.0026622	0.561693	2.57476	unchange	-1.16893	6.92e-09	8.15989	down	unchange-down
RchiOBHmChr1g0343721	RchiOBHm_Chr1g0343721	Putative acyl-CoA desaturase	NA	NA	NA	NA	unchange	-6.5372	1.1e-21	20.9586	down	unchange-down
RchiOBHmChr1g0344381	RchiOBHm_Chr1g0344381	Putative transferase, protein kinase RLK-Pelle-RLCK-VIIa-2 family	0.411	0.072976	-1.28279	1.13682	unchange	-1.66486	2.28e-12	11.6421	down	unchange-down
RchiOBHmChr1g0344521	RchiOBHm_Chr1g0344521	Putative Heat shock protein 70 family	NA	NA	NA	NA	unchange	-2.03876	4.1e-06	5.38722	down	unchange-down
RchiOBHmChr1g0346561	RchiOBHm_Chr1g0346561	Putative histidine phosphatase superfamily	1.094	0.24926	0.129613	0.603347	unchange	-1.9236	1.19e-22	21.9245	down	unchange-down
RchiOBHmChr1g0347581	RchiOBHm_Chr1g0347581	Putative proton-exporting ATPase	NA	NA	NA	NA	unchange	-1.52766	0.00320763	2.49382	down	unchange-down
RchiOBHmChr1g0351081	RchiOBHm_Chr1g0351081	Putative abieta-7,13-dien-18-ol hydroxylase	0.748	0.093861	-0.41889	1.02751	unchange	-1.23994	3.26e-06	5.48678	down	unchange-down
RchiOBHmChr1g0354101	RchiOBHm_Chr1g0354101	Putative ADF/Cofilin, ADF-H/Gelsolin-like domain-containing protein	NA	NA	NA	NA	unchange	-1.1273	0.00471599	2.32643	down	unchange-down
RchiOBHmChr1g0358281	RchiOBHm_Chr1g0358281	Putative soyasaponin III rhamnosyltransferase	NA	NA	NA	NA	unchange	-3.38565	2.35e-29	28.6289	down	unchange-down
RchiOBHmChr1g0358291	RchiOBHm_Chr1g0358291	Putative soyasaponin III rhamnosyltransferase	0.896	0.130565	-0.158429	0.884173	unchange	-2.52848	7.18e-22	21.1439	down	unchange-down
RchiOBHmChr1g0359661	RchiOBHm_Chr1g0359661	Putative cytochrome P450	1.003	0.853	0.00432161	0.069051	unchange	-2.12552	9.66e-24	23.015	down	unchange-down
RchiOBHmChr1g0360721	RchiOBHm_Chr1g0360721	Putative flavonoid 3'-monooxygenase	1.033	0.92104	0.0468403	0.0357215	unchange	-2.46094	8.55e-23	22.068	down	unchange-down
RchiOBHmChr1g0361861	RchiOBHm_Chr1g0361861	Putative protein kinase AGC-PDK1 family	1.043	0.66208	0.0607392	0.17909	unchange	-1.30026	4.99e-11	10.3019	down	unchange-down
RchiOBHmChr1g0362831	RchiOBHm_Chr1g0362831	Putative thioredoxin	1.334	NA	0.415759	NA	unchange	-1.00071	0.0265146	1.57651	down	unchange-down
RchiOBHmChr1g0362841	RchiOBHm_Chr1g0362841	Putative nucleic acid binding NABP, pumilio domain-containing protein	0.813	NA	-0.298673	NA	unchange	-1.18462	2.18e-08	7.66154	down	unchange-down
RchiOBHmChr1g0363361	RchiOBHm_Chr1g0363361	Putative major intrinsic protein	1.179	0.149635	0.237564	0.824967	unchange	-2.2671	7.4e-20	19.1308	down	unchange-down
RchiOBHmChr1g0363801	RchiOBHm_Chr1g0363801	Putative tetraspanin/Peripherin	NA	NA	NA	NA	unchange	-1.4449	1.58e-08	7.80134	down	unchange-down
RchiOBHmChr1g0363811	RchiOBHm_Chr1g0363811	Putative carboxypeptidase D	1.061	0.43338	0.0854247	0.363131	unchange	-1.69258	4.05e-16	15.3925	down	unchange-down
RchiOBHmChr1g0367691	RchiOBHm_Chr1g0367691	Putative caffeate O-methyltransferase	0.653	0.144117	-0.614845	0.841285	unchange	-4.47917	4.77e-72	71.3215	down	unchange-down
RchiOBHmChr1g0368061	RchiOBHm_Chr1g0368061	Putative protein kinase RLK-Pelle-L-LEC family	0.686	0.0198581	-0.54372	1.70206	unchange	-1.05053	1.6e-07	6.79588	down	unchange-down
RchiOBHmChr1g0368491	RchiOBHm_Chr1g0368491	Putative regulator of chromosome condensation 1/beta-lactamase-inhibitor protein II	NA	NA	NA	NA	unchange	-2.79634	5.18e-07	6.28567	down	unchange-down
RchiOBHmChr1g0368541	RchiOBHm_Chr1g0368541	Putative glutamate-5-semialdehyde dehydrogenase, Glutamate 5-kinase	1.026	0.6456	0.0370307	0.190036	unchange	-2.00281	3.46e-22	21.4609	down	unchange-down
RchiOBHmChr1g0368921	RchiOBHm_Chr1g0368921	Putative small heat shock protein HSP20	NA	NA	NA	NA	unchange	-4.47898	2.38e-95	94.6234	down	unchange-down
RchiOBHmChr1g0368991	RchiOBHm_Chr1g0368991	Putative small heat shock protein HSP20	0.457	0.189438	-1.12973	0.722533	unchange	-5.47961	5.32e-119	118.274	down	unchange-down
RchiOBHmChr1g0369251	RchiOBHm_Chr1g0369251	Putative glucan endo-1,3-beta-D-glucosidase	0.999	0.8214	-0.00144342	0.0854453	unchange	-5.29943	8.36e-65	64.0778	down	unchange-down
RchiOBHmChr1g0369541	RchiOBHm_Chr1g0369541	Putative major intrinsic protein	0.917	0.107424	-0.125006	0.968899	unchange	-2.52704	1.6e-24	23.7959	down	unchange-down
RchiOBHmChr1g0373321	RchiOBHm_Chr1g0373321	Putative Heat shock protein DnaJ, cysteine-rich	1.099	0.107475	0.136191	0.968693	unchange	-1.06031	2.09e-06	5.67985	down	unchange-down
RchiOBHmChr1g0376601	RchiOBHm_Chr1g0376601	PREDICTED: post-GPI attachment to proteins factor 3 [Fragaria vesca subsp. vesca]	0.987	NA	-0.018878	NA	unchange	-1.21762	1.85e-05	4.73283	down	unchange-down
RchiOBHmChr1g0378391	RchiOBHm_Chr1g0378391	Putative Heat shock protein Hsp90 family	0.432	0.38446	-1.2109	0.415149	unchange	-2.54632	1.16e-10	9.93554	down	unchange-down
RchiOBHmChr1g0380701	RchiOBHm_Chr1g0380701	Putative dipeptidyl-peptidase IV transcription factor WD40-like family	1.303	0.00088101	0.381837	3.05502	unchange	-1.31076	2.37e-11	10.6253	down	unchange-down
RchiOBHmChr1g0381981	RchiOBHm_Chr1g0381981	Putative Rhodanese-like domain-containing protein	NA	NA	NA	NA	unchange	-1.30856	0.0089732	2.04705	down	unchange-down
RchiOBHmChr1g0384451	RchiOBHm_Chr1g0384451	Putative inositol-pentakisphosphate 2-kinase	0.938	0.42894	-0.0923402	0.367603	unchange	-1.7211	6.36e-05	4.19654	down	unchange-down
RchiOBHmChr2g0085581	RchiOBHm_Chr2g0085581	Putative IQ motif, EF-hand binding, potassium channel, voltage-dependent, EAG/ELK/ERG	NA	NA	NA	NA	unchange	-1.33314	1.3e-11	10.8861	down	unchange-down
RchiOBHmChr2g0089401	RchiOBHm_Chr2g0089401	SH3/FCH domain protein [Arabidopsis thaliana]	NA	NA	NA	NA	unchange	-1.37783	8.95e-09	8.04818	down	unchange-down
RchiOBHmChr2g0091041	RchiOBHm_Chr2g0091041	Putative thiamine diphosphokinase	0.825	0.0054207	-0.277534	2.26594	unchange	-1.51679	1e-08	8	down	unchange-down
RchiOBHmChr2g0091631	RchiOBHm_Chr2g0091631	Putative 43kDa postsynaptic protein	0.809	0.48244	-0.305788	0.316557	unchange	-1.40983	2.58e-12	11.5884	down	unchange-down
RchiOBHmChr2g0091861	RchiOBHm_Chr2g0091861	Putative ceramide glucosyltransferase	NA	NA	NA	NA	unchange	-1.66099	1.04e-16	15.983	down	unchange-down
RchiOBHmChr2g0091971	RchiOBHm_Chr2g0091971	Putative hexokinase	1.113	0.02478	0.154454	1.6059	unchange	-1.12203	2.98e-08	7.52578	down	unchange-down
RchiOBHmChr2g0092251	RchiOBHm_Chr2g0092251	Putative Acid phosphatase	1.322	0.00116452	0.402722	2.93385	unchange	-1.09495	7.09e-08	7.14935	down	unchange-down
RchiOBHmChr2g0093331	RchiOBHm_Chr2g0093331	Putative non-specific polyamine oxidase	0.745	0.076123	-0.424688	1.11848	unchange	-1.57713	7.25e-06	5.13966	down	unchange-down
RchiOBHmChr2g0095521	RchiOBHm_Chr2g0095521	transmembrane protein, putative [Medicago truncatula]	1.414	0.02618	0.499782	1.58203	unchange	-1.17668	5.23e-09	8.2815	down	unchange-down
RchiOBHmChr2g0095551	RchiOBHm_Chr2g0095551	Putative transcription factor ARF family	0.923	0.55288	-0.115597	0.257369	unchange	-1.74775	1.32e-17	16.8794	down	unchange-down
RchiOBHmChr2g0096501	RchiOBHm_Chr2g0096501	Putative glucan endo-1,3-beta-D-glucosidase	0.898	NA	-0.155213	NA	unchange	-2.58677	2.44e-06	5.61261	down	unchange-down
RchiOBHmChr2g0096601	RchiOBHm_Chr2g0096601	Putative minus-end-directed kinesin ATPase	NA	NA	NA	NA	unchange	-1.21611	7.03e-10	9.15304	down	unchange-down
RchiOBHmChr2g0096861	RchiOBHm_Chr2g0096861	Putative leucine-rich repeat domain, L domain-containing protein	0.828	0.030339	-0.272297	1.518	unchange	-1.0055	0.000173614	3.76042	down	unchange-down
RchiOBHmChr2g0097461	RchiOBHm_Chr2g0097461	PREDICTED: protein GRIP [Fragaria vesca subsp. vesca]	NA	NA	NA	NA	unchange	-1.41209	6.05e-06	5.21824	down	unchange-down
RchiOBHmChr2g0097591	RchiOBHm_Chr2g0097591	Putative serine O-acetyltransferase	NA	NA	NA	NA	unchange	-1.86929	2.97e-18	17.5272	down	unchange-down
RchiOBHmChr2g0097601	RchiOBHm_Chr2g0097601	Putative isocitrate dehydrogenase (NAD(+))	1.241	0.020976	0.311503	1.67828	unchange	-1.80381	4.22e-11	10.3747	down	unchange-down
RchiOBHmChr2g0099981	RchiOBHm_Chr2g0099981	Putative cytochrome P450	NA	NA	NA	NA	unchange	-1.89839	6.47e-17	16.1891	down	unchange-down
RchiOBHmChr2g0102661	RchiOBHm_Chr2g0102661	Putative aminoacyltransferase, E1 ubiquitin-activating enzyme	1.053	0.48272	0.0745054	0.316305	unchange	-1.06458	6.88e-08	7.16241	down	unchange-down
RchiOBHmChr2g0102671	RchiOBHm_Chr2g0102671	Putative geranylgeranyl diphosphate synthase	1.105	0.24856	0.144046	0.604569	unchange	-2.12254	2.79e-22	21.5544	down	unchange-down
RchiOBHmChr2g0104521	RchiOBHm_Chr2g0104521	Putative 3-oxolaurate decarboxylase	0.971	0.58904	-0.0424568	0.229855	unchange	-2.1075	3.05e-23	22.5157	down	unchange-down
RchiOBHmChr2g0107321	RchiOBHm_Chr2g0107321	Putative Late embryogenesis abundant protein, LEA-18	1.187	NA	0.24732	NA	unchange	-2.27105	8.3e-23	22.0809	down	unchange-down
RchiOBHmChr2g0107471	RchiOBHm_Chr2g0107471	Putative SKP1/BTB/POZ domain, NPH3 domain-containing protein	1.078	0.5546	0.108357	0.25602	unchange	-1.37605	6.98e-12	11.1561	down	unchange-down
RchiOBHmChr2g0107981	RchiOBHm_Chr2g0107981	Putative adenylyl-sulfate kinase	0.892	0.28602	-0.164884	0.543604	unchange	-1.07063	1.25e-07	6.90309	down	unchange-down
RchiOBHmChr2g0110471	RchiOBHm_Chr2g0110471	Putative cinnamyl-alcohol dehydrogenase	0.93	0.22604	-0.104697	0.645815	unchange	-1.56698	2.18e-14	13.6615	down	unchange-down
RchiOBHmChr2g0111261	RchiOBHm_Chr2g0111261	Putative GDP dissociation inhibitor, FAD/NAD(P)-binding domain-containing protein	3.454	0.064697	1.78827	1.18912	unchange	-1.12434	0.0169114	1.77182	down	unchange-down
RchiOBHmChr2g0115091	RchiOBHm_Chr2g0115091	Putative acyl-CoA oxidase	1.421	0.009659	0.506907	2.01507	unchange	-1.04816	1.96e-07	6.70774	down	unchange-down
RchiOBHmChr2g0115271	RchiOBHm_Chr2g0115271	Putative inositol-3-phosphate synthase	0.981	0.83416	-0.027675	0.0787506	unchange	-1.16711	2.9e-09	8.5376	down	unchange-down
RchiOBHmChr2g0119291	RchiOBHm_Chr2g0119291	Putative catechol O-methyltransferase	0.844	0.2927	-0.244685	0.533577	unchange	-1.75439	1.1e-13	12.9586	down	unchange-down
RchiOBHmChr2g0128091	RchiOBHm_Chr2g0128091	Putative catechol O-methyltransferase	0.846	0.49094	-0.24127	0.308972	unchange	-1.49674	3.71e-10	9.43063	down	unchange-down
RchiOBHmChr2g0128641	RchiOBHm_Chr2g0128641	Putative acyl-CoA oxidase	1.369	0.0128172	0.453122	1.89221	unchange	-1.41912	1.34e-11	10.8729	down	unchange-down
RchiOBHmChr2g0129511	RchiOBHm_Chr2g0129511	Putative riboflavin kinase	1.063	0.68992	0.0881416	0.161201	unchange	-1.17742	1.08e-06	5.96658	down	unchange-down
RchiOBHmChr2g0129981	RchiOBHm_Chr2g0129981	Putative cysteamine dioxygenase	1.128	0.26474	0.173767	0.57718	unchange	-1.12652	3.78e-08	7.42251	down	unchange-down
RchiOBHmChr2g0131061	RchiOBHm_Chr2g0131061	Putative ATPase, AAA-type, core, peptidase, FtsH	1.286	0.0079369	0.362891	2.10035	unchange	-1.00066	3.82e-07	6.41794	down	unchange-down
RchiOBHmChr2g0132281	RchiOBHm_Chr2g0132281	Putative nepenthesin	0.683	0.022939	-0.550043	1.63943	unchange	-1.17663	4.29e-05	4.36754	down	unchange-down
RchiOBHmChr2g0134571	RchiOBHm_Chr2g0134571	Putative glycerol kinase	1.197	0.092015	0.259423	1.03614	unchange	-1.08323	3.98e-08	7.40012	down	unchange-down
RchiOBHmChr2g0135111	RchiOBHm_Chr2g0135111	Putative protein kinase TKL-Pl-1 family	1.346	0.003678	0.428678	2.43439	unchange	-1.13016	3.4e-07	6.46852	down	unchange-down
RchiOBHmChr2g0135631	RchiOBHm_Chr2g0135631	Putative glucan endo-1,3-beta-D-glucosidase	NA	NA	NA	NA	unchange	-2.12294	0.000172638	3.76286	down	unchange-down
RchiOBHmChr2g0135961	RchiOBHm_Chr2g0135961	Putative PLAT/LH2 domain-containing protein	1.245	0.060738	0.316146	1.21654	unchange	-2.324	1.3e-28	27.8861	down	unchange-down
RchiOBHmChr2g0136431	RchiOBHm_Chr2g0136431	Putative peptide deformylase	0.91	0.143302	-0.136062	0.843748	unchange	-1.28312	2.36e-07	6.62709	down	unchange-down
RchiOBHmChr2g0136841	RchiOBHm_Chr2g0136841	Putative Galactose-binding domain-containing protein	0.929	0.51306	-0.106249	0.289832	unchange	-1.86606	5.52e-17	16.2581	down	unchange-down
RchiOBHmChr2g0137261	RchiOBHm_Chr2g0137261	Putative pyridoxal phosphate-dependent transferase	1.348	0.021896	0.43082	1.65964	unchange	-1.91775	5.13e-22	21.2899	down	unchange-down
RchiOBHmChr2g0140711	RchiOBHm_Chr2g0140711	Putative hexokinase	0.911	0.0053186	-0.134477	2.2742	unchange	-1.31587	6.45e-06	5.19044	down	unchange-down
RchiOBHmChr2g0142371	RchiOBHm_Chr2g0142371	Putative small GTPase superfamily, P-loop containing nucleoside triphosphate hydrolase	1.135	0.97896	0.182692	0.00923505	unchange	-1.9021	7.51e-19	18.1244	down	unchange-down
RchiOBHmChr2g0143521	RchiOBHm_Chr2g0143521	Putative beta-fructofuranosidase	1.239	0.44174	0.309176	0.354833	unchange	-1.14841	5.73e-06	5.24185	down	unchange-down
RchiOBHmChr2g0144451	RchiOBHm_Chr2g0144451	Putative dihydrolipoyllysine-residue acetyltransferase	1.004	0.87388	0.00575927	0.0585482	unchange	-1.37496	6.65e-12	11.1772	down	unchange-down
RchiOBHmChr2g0146061	RchiOBHm_Chr2g0146061	Putative tripeptidyl-peptidase II	1.493	0.033942	0.578214	1.46926	unchange	-1.79157	2.54e-19	18.5952	down	unchange-down
RchiOBHmChr2g0149641	RchiOBHm_Chr2g0149641	PREDICTED: uncharacterized membrane protein At1g16860-like [Fragaria vesca subsp. vesca]	1.311	0.039022	0.390668	1.40869	unchange	-1.35271	5.64e-12	11.2487	down	unchange-down
RchiOBHmChr2g0151041	RchiOBHm_Chr2g0151041	Putative polygalacturonate 4-alpha-galacturonosyltransferase	0.705	0.117975	-0.504305	0.92821	unchange	-1.19435	1.07e-09	8.97062	down	unchange-down
RchiOBHmChr2g0152501	RchiOBHm_Chr2g0152501	Putative pyridoxine 4-dehydrogenase	1.099	0.3625	0.136191	0.440692	unchange	-3.96446	2.34e-65	64.6308	down	unchange-down
RchiOBHmChr2g0153111	RchiOBHm_Chr2g0153111	Putative xenobiotic-transporting ATPase	0.58	0.25268	-0.785875	0.597429	unchange	-1.41895	7.8e-11	10.1079	down	unchange-down
RchiOBHmChr2g0153451	RchiOBHm_Chr2g0153451	Putative flavonol 3-O-glucosyltransferase	1.252	0.080436	0.324235	1.09455	unchange	-1.17261	5.87e-06	5.23136	down	unchange-down
RchiOBHmChr2g0155851	RchiOBHm_Chr2g0155851	Putative hydrolase	1.229	0.054119	0.297485	1.26665	unchange	-1.35106	4.21e-05	4.37572	down	unchange-down
RchiOBHmChr2g0155991	RchiOBHm_Chr2g0155991	Putative association with the SNF1 complex (ASC) domain, immunoglobulin E-set	NA	NA	NA	NA	unchange	-1.64093	8.08e-06	5.09259	down	unchange-down
RchiOBHmChr2g0156821	RchiOBHm_Chr2g0156821	Putative DAZ-associated protein 1, RNA recognition motif 2	0.906	0.82402	-0.142417	0.0840622	unchange	-1.39591	2.73e-12	11.5638	down	unchange-down
RchiOBHmChr2g0158631	RchiOBHm_Chr2g0158631	Putative cytochrome P450	0.969	0.56882	-0.0454314	0.245025	unchange	-1.01224	3.42e-07	6.46597	down	unchange-down
RchiOBHmChr2g0159011	RchiOBHm_Chr2g0159011	Putative major intrinsic protein	NA	NA	NA	NA	unchange	-2.58497	0.0428205	1.36835	down	unchange-down
RchiOBHmChr2g0163921	RchiOBHm_Chr2g0163921	Putative proline dehydrogenase	1.789	0.05324	0.839153	1.27376	unchange	-2.41288	1.01e-34	33.9957	down	unchange-down
RchiOBHmChr2g0163981	RchiOBHm_Chr2g0163981	PREDICTED: late embryogenesis abundant protein 76-like isoform X1 [Fragaria vesca subsp. vesca]	NA	NA	NA	NA	unchange	-1.70406	2.6e-13	12.585	down	unchange-down
RchiOBHmChr2g0163991	RchiOBHm_Chr2g0163991	PREDICTED: stress-induced protein KIN2-like [Prunus mume]	NA	NA	NA	NA	unchange	-2.30454	0.0282325	1.54925	down	unchange-down
RchiOBHmChr2g0167291	RchiOBHm_Chr2g0167291	DUF1997 family protein [Medicago truncatula]	0.734	0.017375	-0.446148	1.76008	unchange	-2.86615	2.7e-41	40.5686	down	unchange-down
RchiOBHmChr2g0167701	RchiOBHm_Chr2g0167701	Putative expansin/Lol pI	1.053	0.48184	0.0745054	0.317097	unchange	-3.62007	5.02e-58	57.2993	down	unchange-down
RchiOBHmChr2g0168411	RchiOBHm_Chr2g0168411	Putative gibberellin regulated protein	NA	NA	NA	NA	unchange	-2.76704	2.5e-32	31.6021	down	unchange-down
RchiOBHmChr2g0168851	RchiOBHm_Chr2g0168851	Putative transcription factor Homobox-WOX family	NA	NA	NA	NA	unchange	-3.25016	2.28e-42	41.6421	down	unchange-down
RchiOBHmChr2g0169621	RchiOBHm_Chr2g0169621	Putative thaumatin	0.965	0.86284	-0.0513992	0.0640697	unchange	-2.11009	4.61e-05	4.3363	down	unchange-down
RchiOBHmChr2g0171711	RchiOBHm_Chr2g0171711	Putative peptidase Do	0.822	0.024759	-0.28279	1.60627	unchange	-1.53054	4.23e-14	13.3737	down	unchange-down
RchiOBHmChr2g0173131	RchiOBHm_Chr2g0173131	Putative protein kinase AGC-RSK-2 family	NA	NA	NA	NA	unchange	-1.31409	2.05e-11	10.6882	down	unchange-down
RchiOBHmChr2g0173421	RchiOBHm_Chr2g0173421	Putative transferase	0.78	0.34446	-0.358454	0.462861	unchange	-1.27725	0.000364773	3.43798	down	unchange-down
RchiOBHmChr2g0174041	RchiOBHm_Chr2g0174041	PREDICTED: peptidyl serine alpha-galactosyltransferase [Vitis vinifera]	0.677	0.0164813	-0.562772	1.78301	unchange	-1.49023	0.00014731	3.83177	down	unchange-down
RchiOBHmChr2g0175951	RchiOBHm_Chr2g0175951	Putative oligopeptide transporter, OPT superfamily	1.002	0.97814	0.00288251	0.00959898	unchange	-1.11185	2.95e-08	7.53018	down	unchange-down
RchiOBHmChr2g0176241	RchiOBHm_Chr2g0176241	Putative diacylglycerol acyltransferase, alpha/Beta hydrolase	0.775	0.0048563	-0.367732	2.31369	unchange	-1.08075	4.37e-08	7.35952	down	unchange-down
RchiOBHmChr2g0176411	RchiOBHm_Chr2g0176411	Putative xanthoxin dehydrogenase	1.267	0.23264	0.341417	0.633316	unchange	-5.5407	1.28e-15	14.8928	down	unchange-down
RchiOBHmChr2g0176531	RchiOBHm_Chr2g0176531	Putative cofactor assembly of complex C subunit B, CCB1	0.512	0.2573	-0.965784	0.58956	unchange	-1.39611	1.48e-11	10.8297	down	unchange-down
RchiOBHmChr3g0447721	RchiOBHm_Chr3g0447721	Putative monodehydroascorbate reductase (NADH)	0.908	0.031585	-0.139236	1.50052	unchange	-1.24708	9.3e-09	8.03152	down	unchange-down
RchiOBHmChr3g0447961	RchiOBHm_Chr3g0447961	Putative transcription factor C3H family	1.039	0.57218	0.0551957	0.242467	unchange	-1.02409	1.85e-06	5.73283	down	unchange-down
RchiOBHmChr3g0451351	RchiOBHm_Chr3g0451351	Putative shikimate O-hydroxycinnamoyltransferase	0.325	NA	-1.62149	NA	unchange	-1.93263	0.000185486	3.73169	down	unchange-down
RchiOBHmChr3g0451921	RchiOBHm_Chr3g0451921	Putative 9,9'-di-cis-zeta-carotene desaturase	0.893	0.137904	-0.163268	0.860423	unchange	-1.74707	1.68e-18	17.7747	down	unchange-down
RchiOBHmChr3g0451951	RchiOBHm_Chr3g0451951	Putative EF-hand domain pair protein	0.828	NA	-0.272297	NA	unchange	-2.33481	1.8e-27	26.7447	down	unchange-down
RchiOBHmChr3g0451971	RchiOBHm_Chr3g0451971	Putative protein kinase WNK-NRBP family	NA	NA	NA	NA	unchange	-2.02587	5.13e-24	23.2899	down	unchange-down
RchiOBHmChr3g0452581	RchiOBHm_Chr3g0452581	Putative diacylglycerol acyltransferase, serine aminopeptidase, S33, alpha/Beta hydrolase	0.954	0.46434	-0.0679388	0.333164	unchange	-1.07094	1.14e-07	6.9431	down	unchange-down
RchiOBHmChr3g0453421	RchiOBHm_Chr3g0453421	Putative protein S-acyltransferase	NA	NA	NA	NA	unchange	-1.22603	4.97e-07	6.30364	down	unchange-down
RchiOBHmChr3g0453451	RchiOBHm_Chr3g0453451	Putative carboxylesterase	0.773	0.042822	-0.37146	1.36833	unchange	-1.71393	1.63e-15	14.7878	down	unchange-down
RchiOBHmChr3g0453461	RchiOBHm_Chr3g0453461	PREDICTED: calponin homology domain-containing protein DDB_G0272472-like [Fragaria vesca subsp. vesca]	NA	NA	NA	NA	unchange	-1.0423	6.25e-07	6.20412	down	unchange-down
RchiOBHmChr3g0454551	RchiOBHm_Chr3g0454551	PREDICTED: uncharacterized GPI-anchored protein At5g19250-like [Fragaria vesca subsp. vesca]	NA	NA	NA	NA	unchange	-2.21142	0.000769481	3.1138	down	unchange-down
RchiOBHmChr3g0455191	RchiOBHm_Chr3g0455191	Putative CBS domain, immunoglobulin E-set	1.169	0.091582	0.225275	1.03819	unchange	-2.72588	5.97e-40	39.224	down	unchange-down
RchiOBHmChr3g0457521	RchiOBHm_Chr3g0457521	Putative phosphotransferase with a phosphate group as acceptor	0.751	0.002144	-0.413115	2.66878	unchange	-1.2536	1.82e-09	8.73993	down	unchange-down
RchiOBHmChr3g0457581	RchiOBHm_Chr3g0457581	Putative beta-fructofuranosidase	1.185	0.084183	0.244887	1.07478	unchange	-1.45365	8.69e-12	11.061	down	unchange-down
RchiOBHmChr3g0458271	RchiOBHm_Chr3g0458271	Putative methionine adenosyltransferase	0.679	0.062917	-0.558517	1.20123	unchange	-1.14222	0.0261458	1.5826	down	unchange-down
RchiOBHmChr3g0458521	RchiOBHm_Chr3g0458521	Putative isopenicillin-N epimerase	0.983	0.55086	-0.0247367	0.258959	unchange	-1.07027	2.35e-07	6.62893	down	unchange-down
RchiOBHmChr3g0458901	RchiOBHm_Chr3g0458901	hypothetical protein	2.76	NA	1.46467	NA	unchange	-2.16788	0.0133546	1.87437	down	unchange-down
RchiOBHmChr3g0458971	RchiOBHm_Chr3g0458971	hypothetical protein	0.871	0.69258	-0.199255	0.15953	unchange	-4.50151	0.000116947	3.93201	down	unchange-down
RchiOBHmChr3g0460541	RchiOBHm_Chr3g0460541	Putative plant lipid transfer protein/Par allergen	0.877	0.12946	-0.189351	0.887864	unchange	-4.11582	4.31e-09	8.36552	down	unchange-down
RchiOBHmChr3g0461351	RchiOBHm_Chr3g0461351	Putative alanine--glyoxylate transaminase	0.945	0.52126	-0.0816138	0.282946	unchange	-1.93312	2.08e-22	21.6819	down	unchange-down
RchiOBHmChr3g0461811	RchiOBHm_Chr3g0461811	Putative ferroxidase	1.025	0.8913	0.0356239	0.0499761	unchange	-1.38268	7.92e-10	9.10127	down	unchange-down
RchiOBHmChr3g0461831	RchiOBHm_Chr3g0461831	PREDICTED: uncharacterized PE-PGRS family protein PE_PGRS20 isoform X1 [Malus domestica]	1.272	0.74338	0.347099	0.128789	unchange	-1.78365	7.38e-20	19.1319	down	unchange-down
RchiOBHmChr3g0462061	RchiOBHm_Chr3g0462061	Putative lyase	0.868	0.24832	-0.204233	0.604988	unchange	-1.50581	3.84e-13	12.4157	down	unchange-down
RchiOBHmChr3g0462841	RchiOBHm_Chr3g0462841	Putative selenoprotein, Rdx type	NA	NA	NA	NA	unchange	-1.79282	1e-19	19	down	unchange-down
RchiOBHmChr3g0462851	RchiOBHm_Chr3g0462851	Putative acyl-lipid Delta(12)-acetylenase	0.812	0.083925	-0.300448	1.07611	unchange	-1.60405	7.62e-15	14.118	down	unchange-down
RchiOBHmChr3g0464631	RchiOBHm_Chr3g0464631	Putative bifunctional inhibitor/plant lipid transfer protein/seed storage helical	NA	NA	NA	NA	unchange	-1.42681	0.000705012	3.1518	down	unchange-down
RchiOBHmChr3g0464641	RchiOBHm_Chr3g0464641	plant/T7H20-70 protein [Medicago truncatula]	NA	NA	NA	NA	unchange	-1.25004	1.32e-10	9.87943	down	unchange-down
RchiOBHmChr3g0465091	RchiOBHm_Chr3g0465091	Putative glutamate-5-semialdehyde dehydrogenase, Glutamate 5-kinase	1.361	0.3663	0.444667	0.436163	unchange	-1.93514	5.01e-06	5.30016	down	unchange-down
RchiOBHmChr3g0465231	RchiOBHm_Chr3g0465231	Putative oxidoreductase	0.988	NA	-0.0174171	NA	unchange	-1.7522	8.39e-08	7.07624	down	unchange-down
RchiOBHmChr3g0466461	RchiOBHm_Chr3g0466461	Putative expansin/Lol pI	1.291	0.068318	0.368489	1.16546	unchange	-2.07162	6.14e-10	9.21183	down	unchange-down
RchiOBHmChr3g0468921	RchiOBHm_Chr3g0468921	Putative IQ motif, EF-hand binding protein	0.543	0.092639	-0.880976	1.03321	unchange	-1.14648	1.14e-08	7.9431	down	unchange-down
RchiOBHmChr3g0469901	RchiOBHm_Chr3g0469901	Putative isocitrate dehydrogenase (NAD(+))	1.148	0.0109195	0.199123	1.9618	unchange	-1.02543	3.34e-07	6.47625	down	unchange-down
RchiOBHmChr3g0470701	RchiOBHm_Chr3g0470701	Putative major intrinsic protein	NA	NA	NA	NA	unchange	-2.27908	1.05e-25	24.9788	down	unchange-down
RchiOBHmChr3g0471661	RchiOBHm_Chr3g0471661	Putative transmembrane protein TauE	NA	NA	NA	NA	unchange	-1.81049	6.67e-14	13.1759	down	unchange-down
RchiOBHmChr3g0472421	RchiOBHm_Chr3g0472421	Putative 1,4-alpha-glucan branching enzyme	0.817	0.0102024	-0.291592	1.9913	unchange	-1.12211	2.41e-08	7.61798	down	unchange-down
RchiOBHmChr3g0472851	RchiOBHm_Chr3g0472851	Putative hydrolase	1.085	0.49186	0.117695	0.308158	unchange	-1.12921	2.75e-08	7.56067	down	unchange-down
RchiOBHmChr3g0472961	RchiOBHm_Chr3g0472961	Putative Acid phosphatase	1.578	0.100619	0.658097	0.99732	unchange	-1.5269	2.72e-05	4.56543	down	unchange-down
RchiOBHmChr3g0473661	RchiOBHm_Chr3g0473661	Putative FeS cluster insertion protein	0.795	NA	-0.330973	NA	unchange	-1.09196	9.56e-05	4.01954	down	unchange-down
RchiOBHmChr3g0473671	RchiOBHm_Chr3g0473671	Putative glucosamine-phosphate N-acetyltransferase transcription regulator GNAT family	1.01	0.82144	0.0143553	0.0854242	unchange	-1.65081	5.22e-06	5.28233	down	unchange-down
RchiOBHmChr3g0473831	RchiOBHm_Chr3g0473831	Putative thioredoxin-like protein	0.882	0.37866	-0.181149	0.421751	unchange	-1.46864	2.22e-13	12.6536	down	unchange-down
RchiOBHmChr3g0474931	RchiOBHm_Chr3g0474931	Putative lysosomal Pro-Xaa carboxypeptidase	1.177	0.11344	0.235114	0.945234	unchange	-1.99437	2.39e-23	22.6216	down	unchange-down
RchiOBHmChr3g0475081	RchiOBHm_Chr3g0475081	Putative secoisolariciresinol dehydrogenase	1.17	0.97536	0.226509	0.0108351	unchange	-1.10797	0.0283936	1.54678	down	unchange-down
RchiOBHmChr3g0477361	RchiOBHm_Chr3g0477361	Putative sucrose-phosphate phosphatase	1.181	0.0154771	0.240009	1.81031	unchange	-1.77672	5.67e-19	18.2464	down	unchange-down
RchiOBHmChr3g0479651	RchiOBHm_Chr3g0479651	Putative Actin family	NA	NA	NA	NA	unchange	-1.1953	1.61e-09	8.79317	down	unchange-down
RchiOBHmChr3g0483201	RchiOBHm_Chr3g0483201	Putative protein O-GlcNAc transferase	NA	NA	NA	NA	unchange	-1.28651	6.91e-10	9.16052	down	unchange-down
RchiOBHmChr3g0483571	RchiOBHm_Chr3g0483571	Putative glycerol-3-phosphate dehydrogenase (NAD(+))	0.848	0.074415	-0.237864	1.12834	unchange	-1.37483	7.72e-11	10.1124	down	unchange-down
RchiOBHmChr3g0486001	RchiOBHm_Chr3g0486001	At2g47010/F14M4.16 [Arabidopsis lyrata subsp. lyrata]	1.391	0.0162	0.476122	1.79048	unchange	-1.66541	5.46e-17	16.2628	down	unchange-down
RchiOBHmChr3g0487011	RchiOBHm_Chr3g0487011	Putative NIF system FeS cluster assembly, NifU	0.762	0.063976	-0.392137	1.19398	unchange	-1.45845	1.05e-11	10.9788	down	unchange-down
RchiOBHmChr3g0487571	RchiOBHm_Chr3g0487571	Putative 4-coumarate--CoA ligase	1.043	0.54442	0.0607392	0.264066	unchange	-1.20906	3.14e-09	8.50307	down	unchange-down
RchiOBHmChr3g0487651	RchiOBHm_Chr3g0487651	Putative endopeptidase, NLPC/P60 domain, LRAT-like domain-containing protein	NA	NA	NA	NA	unchange	-1.25206	0.00029136	3.53557	down	unchange-down
RchiOBHmChr3g0488551	RchiOBHm_Chr3g0488551	Putative glutathione transferase	0.848	0.98972	-0.237864	0.00448765	unchange	-1.10062	0.00355013	2.44976	down	unchange-down
RchiOBHmChr3g0488651	RchiOBHm_Chr3g0488651	Putative sucrose synthase	1.006	0.85106	0.00863031	0.0700398	unchange	-2.25359	7.52e-07	6.12378	down	unchange-down
RchiOBHmChr3g0488721	RchiOBHm_Chr3g0488721	plant/F12P19-7 protein [Medicago truncatula]	0.871	0.92136	-0.199255	0.0355706	unchange	-1.64878	0.000155649	3.80785	down	unchange-down
RchiOBHmChr3g0493181	RchiOBHm_Chr3g0493181	Putative non-specific serine/threonine protein kinase	NA	NA	NA	NA	unchange	-1.76806	7.46e-12	11.1273	down	unchange-down
RchiOBHmChr3g0493581	RchiOBHm_Chr3g0493581	carboxypeptidase [Arabidopsis thaliana]	0.322	0.22244	-1.63487	0.652787	unchange	-1.34698	1.14e-05	4.9431	down	unchange-down
RchiOBHmChr3g0494731	RchiOBHm_Chr3g0494731	Putative 4-alpha-glucanotransferase	0.878	0.064615	-0.187707	1.18967	unchange	-2.02085	8.88e-21	20.0516	down	unchange-down
RchiOBHmChr3g0495491	RchiOBHm_Chr3g0495491	PREDICTED: mucin-12-like [Fragaria vesca subsp. vesca]	1.008	0.67498	0.0114956	0.170709	unchange	-1.02343	0.00414598	2.38237	down	unchange-down
RchiOBHmChr3g0496511	RchiOBHm_Chr3g0496511	Putative 5-methyltetrahydropteroyltriglutamate--homocysteine S-methyltransferase	0.748	0.0040358	-0.41889	2.39407	unchange	-1.24574	2.73e-07	6.56384	down	unchange-down
RchiOBHmChr4g0386021	RchiOBHm_Chr4g0386021	Putative transcription factor interactor and regulator LIM family	NA	NA	NA	NA	unchange	-1.61017	3.15e-11	10.5017	down	unchange-down
RchiOBHmChr4g0387791	RchiOBHm_Chr4g0387791	Putative chlorophyll A-B binding protein	1.276	0.44628	0.351628	0.350393	unchange	-2.63907	2.31e-24	23.6364	down	unchange-down
RchiOBHmChr4g0387811	RchiOBHm_Chr4g0387811	Putative perakine reductase	0.96	0.48832	-0.0588937	0.311295	unchange	-1.22564	0.0112077	1.95048	down	unchange-down
RchiOBHmChr4g0388101	RchiOBHm_Chr4g0388101	Putative perakine reductase	0.817	0.00055538	-0.291592	3.25541	unchange	-3.15645	1.48e-53	52.8297	down	unchange-down
RchiOBHmChr4g0392941	RchiOBHm_Chr4g0392941	Putative deoxyribodipyrimidine photo-lyase	0.998	0.93676	-0.00288828	0.0283717	unchange	-1.17782	1.34e-08	7.8729	down	unchange-down
RchiOBHmChr4g0394191	RchiOBHm_Chr4g0394191	Putative hydrolase	NA	NA	NA	NA	unchange	-2.04857	1.63e-15	14.7878	down	unchange-down
RchiOBHmChr4g0396151	RchiOBHm_Chr4g0396151	Putative beta-amylase	1.474	0.022282	0.559737	1.65205	unchange	-1.23074	6.66e-09	8.17653	down	unchange-down
RchiOBHmChr4g0396921	RchiOBHm_Chr4g0396921	Putative pectate lyase	1.18	0.040498	0.238787	1.39257	unchange	-1.44585	0.000113912	3.94343	down	unchange-down
RchiOBHmChr4g0399741	RchiOBHm_Chr4g0399741	Putative cucumisin	0.832	0.092256	-0.265345	1.03501	unchange	-1.96411	7.95e-23	22.0996	down	unchange-down
RchiOBHmChr4g0399751	RchiOBHm_Chr4g0399751	Putative tripeptidyl-peptidase II	0.8	0.022636	-0.321928	1.6452	unchange	-1.865	1.59e-21	20.7986	down	unchange-down
RchiOBHmChr4g0409581	RchiOBHm_Chr4g0409581	Putative UDP-glucuronosyl/UDP-glucosyltransferase	2.584	0.073617	1.36961	1.13302	unchange	-1.18363	0.00425919	2.37067	down	unchange-down
RchiOBHmChr4g0409991	RchiOBHm_Chr4g0409991	PREDICTED: putative ribonuclease H protein At1g65750 [Fragaria vesca subsp. vesca]	NA	NA	NA	NA	unchange	-1.91434	6.82e-05	4.16622	down	unchange-down
RchiOBHmChr4g0411571	RchiOBHm_Chr4g0411571	Putative 15-cis-phytoene desaturase	0.841	0.119737	-0.249822	0.921772	unchange	-1.25793	5.89e-10	9.22988	down	unchange-down
RchiOBHmChr4g0412331	RchiOBHm_Chr4g0412331	Putative peptidylprolyl isomerase	0.237	NA	-2.07704	NA	unchange	-1.61517	1.34e-11	10.8729	down	unchange-down
RchiOBHmChr4g0413021	RchiOBHm_Chr4g0413021	Putative long-chain-fatty-acid--[acyl-carrier-protein] ligase	1.176	0.069878	0.233888	1.15566	unchange	-1.81605	0.000585723	3.23231	down	unchange-down
RchiOBHmChr4g0415811	RchiOBHm_Chr4g0415811	Putative folate-biopterin transporter, major facilitator superfamily domain-containing protein	NA	NA	NA	NA	unchange	-1.0841	1.43e-07	6.84466	down	unchange-down
RchiOBHmChr4g0415821	RchiOBHm_Chr4g0415821	DUF1677 family protein [Medicago truncatula]	1.297	NA	0.375178	NA	unchange	-1.66315	2.34e-17	16.6308	down	unchange-down
RchiOBHmChr4g0416341	RchiOBHm_Chr4g0416341	Putative 5'-nucleotidase	1.008	0.75624	0.0114956	0.12134	unchange	-1.16528	3.07e-08	7.51286	down	unchange-down
RchiOBHmChr4g0416551	RchiOBHm_Chr4g0416551	Putative pyridoxal phosphatase	NA	NA	NA	NA	unchange	-1.89651	4.14e-14	13.383	down	unchange-down
RchiOBHmChr4g0419001	RchiOBHm_Chr4g0419001	Putative serine aminopeptidase, S33, alpha/Beta hydrolase	0.986	0.94292	-0.0203404	0.0255252	unchange	-1.56264	4.63e-11	10.3344	down	unchange-down
RchiOBHmChr4g0421311	RchiOBHm_Chr4g0421311	Putative triacylglycerol lipase	NA	NA	NA	NA	unchange	-1.06449	1.49e-07	6.82681	down	unchange-down
RchiOBHmChr4g0423401	RchiOBHm_Chr4g0423401	Putative acyl-CoA dehydrogenase/oxidase, protein kinase	1.186	0.0030643	0.246104	2.51367	unchange	-1.51891	1.37e-14	13.8633	down	unchange-down
RchiOBHmChr4g0423821	RchiOBHm_Chr4g0423821	Putative galacturan 1,4-alpha-galacturonidase	0.885	0.38776	-0.176251	0.411437	unchange	-1.04435	8.4e-06	5.07572	down	unchange-down
RchiOBHmChr4g0424631	RchiOBHm_Chr4g0424631	Putative glucan endo-1,3-beta-D-glucosidase	1.4	0.084217	0.485427	1.0746	unchange	-1.22204	5.92e-09	8.22768	down	unchange-down
RchiOBHmChr4g0424811	RchiOBHm_Chr4g0424811	Putative aminoacyltransferase, E1 ubiquitin-activating enzyme	3.277	0.134495	1.71238	0.871294	unchange	-1.06364	1.04e-07	6.98297	down	unchange-down
RchiOBHmChr4g0424871	RchiOBHm_Chr4g0424871	Putative transcription regulator GNAT family	4.157	NA	2.05554	NA	unchange	-1.26995	0.000519174	3.28469	down	unchange-down
RchiOBHmChr4g0425351	RchiOBHm_Chr4g0425351	Putative protein kinase TKL-CTR1-DRK-2 family	0.771	0.25806	-0.375197	0.588279	unchange	-1.4227	2.76e-13	12.5591	down	unchange-down
RchiOBHmChr4g0425861	RchiOBHm_Chr4g0425861	Putative pectinesterase inhibitor domain, Cell wall/vacuolar inhibitor of fructosidase	NA	NA	NA	NA	unchange	-1.80787	7.92e-14	13.1013	down	unchange-down
RchiOBHmChr4g0426001	RchiOBHm_Chr4g0426001	PREDICTED: desiccation-related protein PCC13-62-like [Fragaria vesca subsp. vesca]	1.18	0.084561	0.238787	1.07283	unchange	-2.78605	6.31e-24	23.2	down	unchange-down
RchiOBHmChr4g0426131	RchiOBHm_Chr4g0426131	Putative beta-glucosidase	0.992	0.8778	-0.011588	0.0566044	unchange	-1.18468	5.29e-09	8.27654	down	unchange-down
RchiOBHmChr4g0427041	RchiOBHm_Chr4g0427041	Putative ubiquitinyl hydrolase 1	1.282	0.0082624	0.358396	2.08289	unchange	-1.77844	0.00153279	2.81452	down	unchange-down
RchiOBHmChr4g0427341	RchiOBHm_Chr4g0427341	Putative transcription factor SBP family	0.668	0.0063769	-0.58208	2.19539	unchange	-1.05751	4.07e-07	6.39041	down	unchange-down
RchiOBHmChr4g0428781	RchiOBHm_Chr4g0428781	Putative peptidylprolyl isomerase	0.779	0.00083852	-0.360305	3.07649	unchange	-1.10241	0.00388626	2.41047	down	unchange-down
RchiOBHmChr4g0429491	RchiOBHm_Chr4g0429491	Putative Crotonase superfamily, crontonase, enoyl-CoA hydratase/isomerase	1.289	0.045336	0.366252	1.34356	unchange	-1.12077	1.16e-08	7.93554	down	unchange-down
RchiOBHmChr4g0431921	RchiOBHm_Chr4g0431921	Putative small heat shock protein HSP20	0.243	NA	-2.04097	NA	unchange	-4.73607	1.96e-06	5.70774	down	unchange-down
RchiOBHmChr4g0432291	RchiOBHm_Chr4g0432291	Putative pectate lyase	0.941	0.2951	-0.0877334	0.530031	unchange	-2.31992	0.00243693	2.61316	down	unchange-down
RchiOBHmChr4g0432561	RchiOBHm_Chr4g0432561	Putative sieve element occlusion	1.171	0.0075383	0.227741	2.12273	unchange	-1.4278	0.0144625	1.83976	down	unchange-down
RchiOBHmChr4g0432611	RchiOBHm_Chr4g0432611	Putative sieve element occlusion	1.198	0.007703	0.260628	2.11334	unchange	-2.1924	2.29e-05	4.64016	down	unchange-down
RchiOBHmChr4g0433281	RchiOBHm_Chr4g0433281	Putative carboxylic ester hydrolase	NA	NA	NA	NA	unchange	-1.5204	3.57e-15	14.4473	down	unchange-down
RchiOBHmChr4g0433881	RchiOBHm_Chr4g0433881	Putative sulfhydrogenase	0.861	0.027501	-0.215915	1.56065	unchange	-1.17093	9.47e-08	7.02365	down	unchange-down
RchiOBHmChr4g0436791	RchiOBHm_Chr4g0436791	Putative uridine kinase	1.137	0.099978	0.185232	1.0001	unchange	-1.73375	1.23e-11	10.9101	down	unchange-down
RchiOBHmChr4g0437011	RchiOBHm_Chr4g0437011	PREDICTED: WPP domain-interacting tail-anchored protein 2 isoform X2 [Fragaria vesca subsp. vesca]	1.152	0.0096579	0.204141	2.01512	unchange	-1.57636	1.64e-14	13.7852	down	unchange-down
RchiOBHmChr4g0437071	RchiOBHm_Chr4g0437071	Putative thioredoxin-like, peroxiredoxin-like FAM213/AAED1	0.337	NA	-1.56918	NA	unchange	-2.32441	7.65e-22	21.1163	down	unchange-down
RchiOBHmChr4g0437751	RchiOBHm_Chr4g0437751	Putative cytochrome P450, EF-Hand 1, calcium-binding protein	1.217	0.032215	0.283329	1.49194	unchange	-2.57954	5.09e-25	24.2933	down	unchange-down
RchiOBHmChr4g0437821	RchiOBHm_Chr4g0437821	Putative rossmann-like alpha/beta/alpha sandwich protein	0.123	NA	-3.02327	NA	unchange	-2.50025	3.95e-35	34.4034	down	unchange-down
RchiOBHmChr4g0437981	RchiOBHm_Chr4g0437981	Putative 6-phosphogluconolactonase	1.246	0.140784	0.317304	0.851447	unchange	-1.03087	1.61e-05	4.79317	down	unchange-down
RchiOBHmChr4g0440111	RchiOBHm_Chr4g0440111	Putative transcription factor bHLH family	NA	NA	NA	NA	unchange	-2.31515	0.000486482	3.31293	down	unchange-down
RchiOBHmChr4g0440361	RchiOBHm_Chr4g0440361	Putative CBS domain-containing protein	1.219	0.35418	0.285698	0.450776	unchange	-1.05112	2.42e-05	4.61618	down	unchange-down
RchiOBHmChr4g0440561	RchiOBHm_Chr4g0440561	Putative glycosidase	0.773	0.037619	-0.37146	1.42459	unchange	-1.31213	1.25e-10	9.90309	down	unchange-down
RchiOBHmChr4g0440591	RchiOBHm_Chr4g0440591	plant/T7N9-9 protein [Medicago truncatula]	1.033	0.44006	0.0468403	0.356488	unchange	-1.1919	3.31e-09	8.48017	down	unchange-down
RchiOBHmChr4g0441111	RchiOBHm_Chr4g0441111	Putative 1-phosphatidylinositol-3-phosphate 5-kinase chromatin regulator PHD family	0.858	0.23194	-0.22095	0.634624	unchange	-1.30315	3.26e-10	9.48678	down	unchange-down
RchiOBHmChr4g0441641	RchiOBHm_Chr4g0441641	Putative START-like domain-containing protein	0.76	0.023405	-0.395929	1.63069	unchange	-4.09014	4.48e-26	25.3487	down	unchange-down
RchiOBHmChr4g0443261	RchiOBHm_Chr4g0443261	Putative deacetoxyvindoline 4-hydroxylase	0.933	0.89864	-0.100051	0.0464143	unchange	-1.04492	8.01e-05	4.09637	down	unchange-down
RchiOBHmChr4g0443311	RchiOBHm_Chr4g0443311	Putative Gnk2-like domain-containing protein	1.985	0.127175	0.989139	0.895598	unchange	-1.43948	2.2e-13	12.6576	down	unchange-down
RchiOBHmChr4g0443471	RchiOBHm_Chr4g0443471	Putative cellulase	0.884	0.47918	-0.177882	0.319501	unchange	-2.53889	1.08e-23	22.9666	down	unchange-down
RchiOBHmChr4g0444931	RchiOBHm_Chr4g0444931	Putative MT-associated protein TORTIFOLIA1/SPIRAL2	NA	NA	NA	NA	unchange	-1.7547	6.56e-20	19.1831	down	unchange-down
RchiOBHmChr4g0445091	RchiOBHm_Chr4g0445091	Putative transcription factor bHLH family	NA	NA	NA	NA	unchange	-1.54255	1.9e-14	13.7212	down	unchange-down
RchiOBHmChr4g0445221	RchiOBHm_Chr4g0445221	Putative tetratricopeptide repeat protein	1.412	0.0183824	0.49774	1.7356	unchange	-1.24803	6.36e-10	9.19654	down	unchange-down
RchiOBHmChr4g0445311	RchiOBHm_Chr4g0445311	Putative 7-deoxyloganetin glucosyltransferase	1.035	0.86194	0.0496308	0.064523	unchange	-1.00495	0.000702088	3.15361	down	unchange-down
RchiOBHmChr4g0445761	RchiOBHm_Chr4g0445761	Putative defensin, plant	NA	NA	NA	NA	unchange	-1.72557	0.000358507	3.4455	down	unchange-down
RchiOBHmChr5g0001041	RchiOBHm_Chr5g0001041	Putative armadillo-like helical protein	0.755	0.0122755	-0.405451	1.91096	unchange	-1.22399	6.44e-10	9.19111	down	unchange-down
RchiOBHmChr5g0001781	RchiOBHm_Chr5g0001781	Putative ubiquinol oxidase (non-electrogenic)	0.888	0.30044	-0.171368	0.522242	unchange	-2.44232	1.24e-35	34.9066	down	unchange-down
RchiOBHmChr5g0001791	RchiOBHm_Chr5g0001791	Putative transcription factor WD40-like family	0.986	0.97592	-0.0203404	0.0105858	unchange	-1.01976	1.96e-07	6.70774	down	unchange-down
RchiOBHmChr5g0001851	RchiOBHm_Chr5g0001851	Putative plastid lipid-associated protein/fibrillin	0.975	0.80504	-0.0365259	0.0941825	unchange	-2.03063	9.14e-20	19.0391	down	unchange-down
RchiOBHmChr5g0003871	RchiOBHm_Chr5g0003871	Putative pectinesterase	0.73	0.0117003	-0.454032	1.9318	unchange	-2.31715	2.06e-17	16.6861	down	unchange-down
RchiOBHmChr5g0004011	RchiOBHm_Chr5g0004011	Putative transferase	0.721	0.034281	-0.471929	1.46495	unchange	-1.84689	4.22e-09	8.37469	down	unchange-down
RchiOBHmChr5g0004601	RchiOBHm_Chr5g0004601	Putative phosphosulfolactate synthase	0.787	0.070897	-0.345564	1.14937	unchange	-1.56417	1.33e-13	12.8761	down	unchange-down
RchiOBHmChr5g0006761	RchiOBHm_Chr5g0006761	Putative oxidoreductase	1.469	0.034404	0.554834	1.46339	unchange	-2.03846	6.1e-21	20.2147	down	unchange-down
RchiOBHmChr5g0007541	RchiOBHm_Chr5g0007541	Putative carboxypeptidase D	0.986	0.82882	-0.0203404	0.0815398	unchange	-1.7389	0.0493161	1.30701	down	unchange-down
RchiOBHmChr5g0009591	RchiOBHm_Chr5g0009591	Putative anthocyanidin 3-O-glucoside 2''-O-glucosyltransferase	NA	NA	NA	NA	unchange	-2.51519	0.0363687	1.43927	down	unchange-down
RchiOBHmChr5g0010881	RchiOBHm_Chr5g0010881	Putative transcription factor WD40-like family	0.903	0.104443	-0.147202	0.981121	unchange	-1.02604	1.23e-05	4.91009	down	unchange-down
RchiOBHmChr5g0011071	RchiOBHm_Chr5g0011071	Putative protein kinase CAMK-CAMKL-CHK1 family	NA	NA	NA	NA	unchange	-1.33608	3.78e-09	8.42251	down	unchange-down
RchiOBHmChr5g0011651	RchiOBHm_Chr5g0011651	Putative NADH:ubiquinone oxidoreductase intermediate-associated protein	1.248	0.00116332	0.319618	2.9343	unchange	-1.75916	7.52e-19	18.1238	down	unchange-down
RchiOBHmChr5g0012921	RchiOBHm_Chr5g0012921	Putative phytochrome, histidine kinase domain, nitrogen fixation negative regulator NifL, GAF	1.281	0.0073646	0.35727	2.13285	unchange	-1.77306	4.66e-16	15.3316	down	unchange-down
RchiOBHmChr5g0016041	RchiOBHm_Chr5g0016041	Putative Arf GTPase activating protein	1.89	NA	0.918386	NA	unchange	-1.07322	9.11e-07	6.04048	down	unchange-down
RchiOBHmChr5g0017561	RchiOBHm_Chr5g0017561	Putative tetrahydroberberine oxidase	1.113	0.8108	0.154454	0.0910863	unchange	-1.64157	7.8e-06	5.10791	down	unchange-down
RchiOBHmChr5g0018331	RchiOBHm_Chr5g0018331	Putative UDP-arabinose 4-epimerase	1.379	0.0076615	0.463622	2.11569	unchange	-1.15892	8.23e-09	8.0846	down	unchange-down
RchiOBHmChr5g0022491	RchiOBHm_Chr5g0022491	Putative CTP synthase (glutamine hydrolyzing)	NA	NA	NA	NA	unchange	-1.01557	0.0135215	1.86898	down	unchange-down
RchiOBHmChr5g0024151	RchiOBHm_Chr5g0024151	Putative oxidoreductase	1.036	0.59036	0.051024	0.228883	unchange	-3.02699	6.4e-13	12.1938	down	unchange-down
RchiOBHmChr5g0029151	RchiOBHm_Chr5g0029151	Putative 7-deoxyloganetin glucosyltransferase	1.041	0.66662	0.0579701	0.176122	unchange	-1.00712	9.64e-05	4.01592	down	unchange-down
RchiOBHmChr5g0030721	RchiOBHm_Chr5g0030721	Putative small GTPase superfamily, P-loop containing nucleoside triphosphate hydrolase	1.035	0.42942	0.0496308	0.367118	unchange	-1.01297	7.13e-07	6.14691	down	unchange-down
RchiOBHmChr5g0031131	RchiOBHm_Chr5g0031131	Putative bulb-type lectin domain, PAN/Apple domain-containing protein	1.9	NA	0.925999	NA	unchange	-2.93843	0.000290875	3.53629	down	unchange-down
RchiOBHmChr5g0031161	RchiOBHm_Chr5g0031161	Putative phosphoenolpyruvate carboxylase	0.954	0.48212	-0.0679388	0.316845	unchange	-2.09063	2.72e-22	21.5654	down	unchange-down
RchiOBHmChr5g0031821	RchiOBHm_Chr5g0031821	Putative homogentisate 1,2-dioxygenase	1.124	0.046022	0.168642	1.33703	unchange	-1.07596	4.24e-08	7.37263	down	unchange-down
RchiOBHmChr5g0033941	RchiOBHm_Chr5g0033941	Putative protein-disulfide reductase	0.99	0.91144	-0.0144996	0.0402719	unchange	-1.32282	1.66e-11	10.7799	down	unchange-down
RchiOBHmChr5g0036671	RchiOBHm_Chr5g0036671	Putative isopenicillin-N epimerase	NA	NA	NA	NA	unchange	-1.2398	0.0104765	1.97978	down	unchange-down
RchiOBHmChr5g0037831	RchiOBHm_Chr5g0037831	Putative cupredoxin	NA	NA	NA	NA	unchange	-1.66363	0.000712292	3.14734	down	unchange-down
RchiOBHmChr5g0037901	RchiOBHm_Chr5g0037901	Putative triose phosphate/phosphoenolpyruvate translocator, sugar phosphate transporter	1.193	0.16506	0.254594	0.782358	unchange	-1.65518	5.78e-17	16.2381	down	unchange-down
RchiOBHmChr5g0038101	RchiOBHm_Chr5g0038101	Putative lyase	0.775	0.149221	-0.367732	0.82617	unchange	-2.29837	1.18e-23	22.9281	down	unchange-down
RchiOBHmChr5g0038461	RchiOBHm_Chr5g0038461	Putative 7-deoxyloganetin glucosyltransferase	1.314	0.00194122	0.393965	2.71193	unchange	-1.8863	3.49e-13	12.4572	down	unchange-down
RchiOBHmChr5g0043321	RchiOBHm_Chr5g0043321	Putative oxidoreductase	0.967	0.99926	-0.0484122	0.000321497	unchange	-3.93228	1.05e-31	30.9788	down	unchange-down
RchiOBHmChr5g0046551	RchiOBHm_Chr5g0046551	Putative neoxanthin synthase	0.893	0.032242	-0.163268	1.49158	unchange	-3.11282	1.43e-06	5.84466	down	unchange-down
RchiOBHmChr5g0049161	RchiOBHm_Chr5g0049161	Putative succinate dehydrogenase (quinone)	1.444	0.090538	0.530071	1.04317	unchange	-1.48357	1.06e-13	12.9747	down	unchange-down
RchiOBHmChr5g0051791	RchiOBHm_Chr5g0051791	Putative peptide-methionine (R)-S-oxide reductase	NA	NA	NA	NA	unchange	-2.15546	2.11e-06	5.67572	down	unchange-down
RchiOBHmChr5g0051981	RchiOBHm_Chr5g0051981	Putative sodium/sulfate symporter	NA	NA	NA	NA	unchange	-1.78916	2.06e-13	12.6861	down	unchange-down
RchiOBHmChr5g0055131	RchiOBHm_Chr5g0055131	Putative iron-chelate-transporting ATPase	NA	NA	NA	NA	unchange	-1.55787	0.0192538	1.71548	down	unchange-down
RchiOBHmChr5g0056301	RchiOBHm_Chr5g0056301	Putative lysosomal Pro-Xaa carboxypeptidase	NA	NA	NA	NA	unchange	-1.49016	2.45e-05	4.61083	down	unchange-down
RchiOBHmChr5g0056341	RchiOBHm_Chr5g0056341	Putative carboxypeptidase C	NA	NA	NA	NA	unchange	-1.11626	1.23e-06	5.91009	down	unchange-down
RchiOBHmChr5g0056351	RchiOBHm_Chr5g0056351	Putative carboxypeptidase C	1.275	0.02476	0.350497	1.60625	unchange	-1.44646	3.74e-10	9.42713	down	unchange-down
RchiOBHmChr5g0059241	RchiOBHm_Chr5g0059241	Putative 1-deoxy-D-xylulose-5-phosphate synthase chromatin regulator PHD family	NA	NA	NA	NA	unchange	-1.16984	0.00611943	2.21329	down	unchange-down
RchiOBHmChr5g0059471	RchiOBHm_Chr5g0059471	Putative (E)-4-hydroxy-3-methylbut-2-enyl-diphosphate synthase (ferredoxin)	1.051	0.44738	0.0717627	0.349323	unchange	-1.26857	8.78e-11	10.0565	down	unchange-down
RchiOBHmChr5g0059601	RchiOBHm_Chr5g0059601	Putative aminoacyltransferase, E1 ubiquitin-activating enzyme	NA	NA	NA	NA	unchange	-1.05538	3.86e-07	6.41341	down	unchange-down
RchiOBHmChr5g0061261	RchiOBHm_Chr5g0061261	Putative V-type ATPase, V0 complex, 116kDa subunit family	1.057	0.3311	0.0799754	0.480041	unchange	-1.07474	1.35e-07	6.86967	down	unchange-down
RchiOBHmChr5g0061841	RchiOBHm_Chr5g0061841	PREDICTED: BTB/POZ domain-containing protein At5g60050 [Fragaria vesca subsp. vesca]	NA	NA	NA	NA	unchange	-1.24157	0.000947386	3.02347	down	unchange-down
RchiOBHmChr5g0062381	RchiOBHm_Chr5g0062381	Putative very-long-chain 3-oxoacyl-CoA synthase	0.575	0.053917	-0.798366	1.26827	unchange	-1.3264	6.96e-05	4.15739	down	unchange-down
RchiOBHmChr5g0063331	RchiOBHm_Chr5g0063331	Putative small heat shock protein HSP20	NA	NA	NA	NA	unchange	-4.32455	1.57e-24	23.8041	down	unchange-down
RchiOBHmChr5g0063631	RchiOBHm_Chr5g0063631	plant/mmn10-180 protein [Medicago truncatula]	1.262	0.47792	0.335712	0.320645	unchange	-1.6281	4.13e-16	15.384	down	unchange-down
RchiOBHmChr5g0063871	RchiOBHm_Chr5g0063871	Putative membrane insertase OXA1/ALB3/YidC, membrane insertase YidC/Oxa1	NA	NA	NA	NA	unchange	-1.24308	2.3e-10	9.63827	down	unchange-down
RchiOBHmChr5g0065101	RchiOBHm_Chr5g0065101	Putative lyase	NA	NA	NA	NA	unchange	-3.37002	2.49e-09	8.6038	down	unchange-down
RchiOBHmChr5g0068321	RchiOBHm_Chr5g0068321	Putative glycogen phosphorylase	0.831	0.004976	-0.26708	2.30312	unchange	-2.88879	1.1e-12	11.9586	down	unchange-down
RchiOBHmChr5g0070221	RchiOBHm_Chr5g0070221	Putative asparagine synthase (glutamine-hydrolyzing)	1.07	0.170043	0.0976108	0.769441	unchange	-1.21906	3.85e-09	8.41454	down	unchange-down
RchiOBHmChr5g0071491	RchiOBHm_Chr5g0071491	Putative glycosidase	9.687	0.2242	3.27605	0.649364	unchange	-2.1894	2.1e-25	24.6778	down	unchange-down
RchiOBHmChr5g0072501	RchiOBHm_Chr5g0072501	Putative aerolysin, Agglutinin domain, aerolysin-like toxin, beta complex domain-containing protein	0.956	0.7256	-0.0649175	0.139303	unchange	-4.10116	1.03e-08	7.98716	down	unchange-down
RchiOBHmChr5g0072761	RchiOBHm_Chr5g0072761	Putative expansin/Lol pI	1.287	0.065556	0.364012	1.18339	unchange	-2.788	3.32e-37	36.4789	down	unchange-down
RchiOBHmChr5g0073661	RchiOBHm_Chr5g0073661	Putative protein kinase RLK-Pelle-LRR-VIII-1 family	0.845	0.59932	-0.242977	0.222341	unchange	-1.34982	8.03e-11	10.0953	down	unchange-down
RchiOBHmChr5g0076311	RchiOBHm_Chr5g0076311	Putative oligopeptide transporter, OPT superfamily	NA	NA	NA	NA	unchange	-1.03887	1.22e-05	4.91364	down	unchange-down
RchiOBHmChr5g0077331	RchiOBHm_Chr5g0077331	Putative histone deacetylase	1.381	0.00046116	0.465713	3.33615	unchange	-1.96866	1.91e-15	14.719	down	unchange-down
RchiOBHmChr5g0081261	RchiOBHm_Chr5g0081261	Putative cation efflux protein	NA	NA	NA	NA	unchange	-1.20332	5.03e-07	6.29843	down	unchange-down
RchiOBHmChr6g0244741	RchiOBHm_Chr6g0244741	PREDICTED: putative amidase C869.01 isoform X1 [Prunus mume]	0.883	0.088042	-0.179515	1.05531	unchange	-1.9735	6.63e-18	17.1785	down	unchange-down
RchiOBHmChr6g0245601	RchiOBHm_Chr6g0245601	Putative beta-fructofuranosidase	1.127	0.083999	0.172488	1.07573	unchange	-2.06296	7.88e-26	25.1035	down	unchange-down
RchiOBHmChr6g0245891	RchiOBHm_Chr6g0245891	Putative EF-hand domain pair protein	1.153	0.0648	0.205393	1.18842	unchange	-2.11624	1.37e-16	15.8633	down	unchange-down
RchiOBHmChr6g0248981	RchiOBHm_Chr6g0248981	Putative peptidase S10, serine carboxypeptidase, alpha/Beta hydrolase	1.03	0.6988	0.0426443	0.155647	unchange	-1.76271	1.85e-06	5.73283	down	unchange-down
RchiOBHmChr6g0249111	RchiOBHm_Chr6g0249111	Putative peptidase S10, serine carboxypeptidase, alpha/Beta hydrolase	0.962	0.33946	-0.0558912	0.469211	unchange	-1.82064	0.0353602	1.45149	down	unchange-down
RchiOBHmChr6g0252411	RchiOBHm_Chr6g0252411	Putative ADF/Cofilin, ADF-H/Gelsolin-like domain-containing protein	3.999	0.4081	1.99964	0.389233	unchange	-1.08995	0.000285801	3.54394	down	unchange-down
RchiOBHmChr6g0255711	RchiOBHm_Chr6g0255711	Putative arylformamidase	NA	NA	NA	NA	unchange	-1.64991	0.00116108	2.93514	down	unchange-down
RchiOBHmChr6g0258921	RchiOBHm_Chr6g0258921	Putative protein kinase CAMK-CDPK family	NA	NA	NA	NA	unchange	-1.03873	4.65e-07	6.33255	down	unchange-down
RchiOBHmChr6g0259561	RchiOBHm_Chr6g0259561	Putative flavanone 3-dioxygenase	0.799	0.075221	-0.323733	1.12366	unchange	-1.46636	2.32e-12	11.6345	down	unchange-down
RchiOBHmChr6g0262351	RchiOBHm_Chr6g0262351	Putative 3-oxo-5-alpha-steroid 4-dehydrogenase (NADP(+))	NA	NA	NA	NA	unchange	-1.76973	2.03e-16	15.6925	down	unchange-down
RchiOBHmChr6g0262391	RchiOBHm_Chr6g0262391	Putative 4-hydroxy-3-methylbut-2-enyl diphosphate reductase	0.797	0.0020041	-0.327348	2.69808	unchange	-1.04645	1.58e-07	6.80134	down	unchange-down
RchiOBHmChr6g0264221	RchiOBHm_Chr6g0264221	erythronate-4-phosphate dehydrogenase family protein [Medicago truncatula]	0.349	0.34854	-1.5187	0.457747	unchange	-1.5848	7.5e-16	15.1249	down	unchange-down
RchiOBHmChr6g0265001	RchiOBHm_Chr6g0265001	Putative eugenol synthase	NA	NA	NA	NA	unchange	-2.86451	5.76e-09	8.23958	down	unchange-down
RchiOBHmChr6g0267341	RchiOBHm_Chr6g0267341	Putative SH3 domain, AH domain-containing protein	0.989	0.85786	-0.0159576	0.0665836	unchange	-1.19161	2.83e-07	6.54821	down	unchange-down
RchiOBHmChr6g0268341	RchiOBHm_Chr6g0268341	Putative polyprenol reductase	NA	NA	NA	NA	unchange	-1.12962	1.09e-07	6.96257	down	unchange-down
RchiOBHmChr6g0271961	RchiOBHm_Chr6g0271961	DUF4228 domain protein [Medicago truncatula]	NA	NA	NA	NA	unchange	-1.92248	3.1e-10	9.50864	down	unchange-down
RchiOBHmChr6g0272541	RchiOBHm_Chr6g0272541	Putative protoporphyrin ferrochelatase	1.455	0.056257	0.541019	1.24982	unchange	-1.17558	1.43e-08	7.84466	down	unchange-down
RchiOBHmChr6g0272991	RchiOBHm_Chr6g0272991	Putative benzyl alcohol O-benzoyltransferase	0.913	0.30842	-0.131313	0.510857	unchange	-1.03851	1.58e-07	6.80134	down	unchange-down
RchiOBHmChr6g0273121	RchiOBHm_Chr6g0273121	Putative laccase	NA	NA	NA	NA	unchange	-4.58754	7.59e-16	15.1198	down	unchange-down
RchiOBHmChr6g0276331	RchiOBHm_Chr6g0276331	Putative carbonic anhydrase	0.52	0.113503	-0.943416	0.944993	unchange	-6.74147	0.00118397	2.92666	down	unchange-down
RchiOBHmChr6g0276641	RchiOBHm_Chr6g0276641	Putative ABC transporter, G1, P-loop containing nucleoside triphosphate hydrolase	1.199	0.7313	0.261832	0.135904	unchange	-1.06386	1.93e-06	5.71444	down	unchange-down
RchiOBHmChr6g0276971	RchiOBHm_Chr6g0276971	Putative NTF2-like domain-containing protein	1.383	0.00085887	0.467801	3.06607	unchange	-1.62626	1.28e-09	8.89279	down	unchange-down
RchiOBHmChr6g0280191	RchiOBHm_Chr6g0280191	Putative flavonoid 3'-monooxygenase	0.805	0.22912	-0.312939	0.639937	unchange	-1.12824	0.000793564	3.10042	down	unchange-down
RchiOBHmChr6g0281081	RchiOBHm_Chr6g0281081	Putative chymopapain protein	NA	NA	NA	NA	unchange	-2.60515	4.52e-06	5.34486	down	unchange-down
RchiOBHmChr6g0281131	RchiOBHm_Chr6g0281131	Putative chymopapain protein	NA	NA	NA	NA	unchange	-1.31069	0.00260073	2.5849	down	unchange-down
RchiOBHmChr6g0282021	RchiOBHm_Chr6g0282021	Putative thiolester hydrolase	1.188	0.086841	0.248535	1.06128	unchange	-1.14471	1.16e-08	7.93554	down	unchange-down
RchiOBHmChr6g0283551	RchiOBHm_Chr6g0283551	Putative peptidylprolyl isomerase	0.467	0.167463	-1.09851	0.776081	unchange	-1.01619	6.32e-07	6.19928	down	unchange-down
RchiOBHmChr6g0285041	RchiOBHm_Chr6g0285041	Putative linoleate 13S-lipoxygenase	NA	NA	NA	NA	unchange	-2.43848	5.68e-35	34.2457	down	unchange-down
RchiOBHmChr6g0285061	RchiOBHm_Chr6g0285061	PREDICTED: probable thylakoid lumen protein sll1769 isoform X2 [Solanum tuberosum]	0.786	0.00099925	-0.347399	3.00033	unchange	-1.18936	1.88e-09	8.72584	down	unchange-down
RchiOBHmChr6g0286401	RchiOBHm_Chr6g0286401	Putative pleiotropic drug resistance protein PDR/CDR	0.898	0.045159	-0.155213	1.34526	unchange	-1.71031	9.49e-14	13.0227	down	unchange-down
RchiOBHmChr6g0287961	RchiOBHm_Chr6g0287961	Putative target of Myb protein	1.103	0.23092	0.141433	0.636538	unchange	-1.03257	5.22e-07	6.28233	down	unchange-down
RchiOBHmChr6g0290331	RchiOBHm_Chr6g0290331	Putative methylcrotonoyl-CoA carboxylase	1.159	0.0136636	0.212881	1.86443	unchange	-1.20065	2.01e-09	8.6968	down	unchange-down
RchiOBHmChr6g0290371	RchiOBHm_Chr6g0290371	Putative dual-specificity kinase TKL-Pl-4 family	1.327	0.178243	0.408168	0.748988	unchange	-1.60144	1.12e-15	14.9508	down	unchange-down
RchiOBHmChr6g0292211	RchiOBHm_Chr6g0292211	Putative non-specific serine/threonine protein kinase	0.634	0.67224	-0.657445	0.172476	unchange	-1.74144	3.73e-15	14.4283	down	unchange-down
RchiOBHmChr6g0292951	RchiOBHm_Chr6g0292951	Putative SKP1/BTB/POZ domain, NPH3 domain-containing protein	1.268	0.23732	0.342555	0.624666	unchange	-1.69801	1.79e-18	17.7471	down	unchange-down
RchiOBHmChr6g0294011	RchiOBHm_Chr6g0294011	Putative UDP-glucuronate decarboxylase	0.854	0.089884	-0.227692	1.04632	unchange	-1.66942	0.000343591	3.46396	down	unchange-down
RchiOBHmChr6g0294351	RchiOBHm_Chr6g0294351	Putative cellulase	1.774	0.060139	0.827006	1.22084	unchange	-2.20559	7.73e-06	5.11182	down	unchange-down
RchiOBHmChr6g0294521	RchiOBHm_Chr6g0294521	Putative fumarate hydratase	1.07	0.36574	0.0976108	0.436828	unchange	-1.44443	1.17e-13	12.9318	down	unchange-down
RchiOBHmChr6g0294811	RchiOBHm_Chr6g0294811	Putative profilin	0.708	0.071703	-0.498179	1.14446	unchange	-2.72938	1.63e-15	14.7878	down	unchange-down
RchiOBHmChr6g0295121	RchiOBHm_Chr6g0295121	Putative oxidoreductase	0.617	NA	-0.696658	NA	unchange	-1.37427	0.00301719	2.5204	down	unchange-down
RchiOBHmChr6g0295581	RchiOBHm_Chr6g0295581	Putative glutathione-specific gamma-glutamylcyclotransferase, gamma-glutamyl cyclotransferase	0.816	0.0166978	-0.293359	1.77734	unchange	-1.05857	1.69e-05	4.77211	down	unchange-down
RchiOBHmChr6g0295661	RchiOBHm_Chr6g0295661	Putative sugar phosphate transporter domain-containing protein	1.24	0.3173	0.31034	0.49853	unchange	-1.08181	3.59e-08	7.44491	down	unchange-down
RchiOBHmChr6g0296951	RchiOBHm_Chr6g0296951	Putative 3,5-dihydroxybiphenyl synthase	0.764	0.0071605	-0.388355	2.14506	unchange	-5.0869	0.0200904	1.69701	down	unchange-down
RchiOBHmChr6g0298671	RchiOBHm_Chr6g0298671	Putative cytochrome b-c1 complex subunit 7	1.061	0.69632	0.0854247	0.157191	unchange	-1.01422	3.86e-07	6.41341	down	unchange-down
RchiOBHmChr6g0299121	RchiOBHm_Chr6g0299121	Putative peroxidase	NA	NA	NA	NA	unchange	-1.87108	1.86e-08	7.73049	down	unchange-down
RchiOBHmChr6g0300151	RchiOBHm_Chr6g0300151	Putative cytochrome P450	NA	NA	NA	NA	unchange	-1.00776	0.00490601	2.30927	down	unchange-down
RchiOBHmChr6g0301131	RchiOBHm_Chr6g0301131	Putative very-long-chain 3-oxoacyl-CoA synthase	NA	NA	NA	NA	unchange	-2.09563	1.25e-26	25.9031	down	unchange-down
RchiOBHmChr6g0301141	RchiOBHm_Chr6g0301141	Putative major facilitator, sugar transporter, major facilitator superfamily	1.16	0.3894	0.214125	0.409604	unchange	-1.02661	4.39e-07	6.35754	down	unchange-down
RchiOBHmChr6g0301651	RchiOBHm_Chr6g0301651	Putative mitogen-activated protein kinase CMGC-MAPK family	0.702	0.052677	-0.510457	1.27838	unchange	-1.16386	2.6e-07	6.58503	down	unchange-down
RchiOBHmChr6g0303061	RchiOBHm_Chr6g0303061	PREDICTED: thaumatin-like protein 1b [Fragaria vesca subsp. vesca]	2.856	NA	1.514	NA	unchange	-1.03109	0.0385814	1.41362	down	unchange-down
RchiOBHmChr6g0303411	RchiOBHm_Chr6g0303411	Putative triacylglycerol lipase	NA	NA	NA	NA	unchange	-1.44971	0.00243693	2.61316	down	unchange-down
RchiOBHmChr6g0304841	RchiOBHm_Chr6g0304841	Putative cadmium-transporting ATPase	1.174	0.092182	0.231432	1.03535	unchange	-1.46552	4.47e-14	13.3497	down	unchange-down
RchiOBHmChr6g0304901	RchiOBHm_Chr6g0304901	Putative proton-exporting ATPase	1.099	0.198162	0.136191	0.70298	unchange	-1.87095	1.48e-15	14.8297	down	unchange-down
RchiOBHmChr6g0306591	RchiOBHm_Chr6g0306591	Putative malate dehydrogenase (oxaloacetate-decarboxylating) (NADP(+))	1.127	0.069981	0.172488	1.15502	unchange	-1.6873	1.14e-16	15.9431	down	unchange-down
RchiOBHmChr6g0307611	RchiOBHm_Chr6g0307611	Putative phosphatidate phosphatase	0.717	NA	-0.479955	NA	unchange	-1.08135	2.15e-05	4.66756	down	unchange-down
RchiOBHmChr6g0307931	RchiOBHm_Chr6g0307931	Putative hydro-lyase	1.037	0.84106	0.0524159	0.075173	unchange	-1.14734	9.39e-06	5.02733	down	unchange-down
RchiOBHmChr6g0308771	RchiOBHm_Chr6g0308771	hypothetical protein	3.565	NA	1.8339	NA	unchange	-2.20632	1.11e-29	28.9547	down	unchange-down
RchiOBHmChr6g0309511	RchiOBHm_Chr6g0309511	Putative aminoacyltransferase, E1 ubiquitin-activating enzyme	NA	NA	NA	NA	unchange	-1.30211	7.28e-09	8.13787	down	unchange-down
RchiOBHmChr6g0311451	RchiOBHm_Chr6g0311451	Putative small heat shock protein HSP20	0.609	0.123402	-0.715486	0.908678	unchange	-4.40076	4.82e-95	94.317	down	unchange-down
RchiOBHmChr7g0177421	RchiOBHm_Chr7g0177421	Putative sucrose synthase	0.893	0.29992	-0.163268	0.522995	unchange	-2.40749	1.85e-07	6.73283	down	unchange-down
RchiOBHmChr7g0178021	RchiOBHm_Chr7g0178021	Putative glutamine synthetase	0.993	0.94518	-0.0101344	0.0244855	unchange	-2.38665	2.42e-24	23.6162	down	unchange-down
RchiOBHmChr7g0178471	RchiOBHm_Chr7g0178471	Putative phosphoethanolamine N-methyltransferase	0.623	0.071063	-0.682696	1.14836	unchange	-1.48894	6.36e-12	11.1965	down	unchange-down
RchiOBHmChr7g0179381	RchiOBHm_Chr7g0179381	Putative undecaprenyldiphospho-muramoylpentapeptide beta-N- acetylglucosaminyltransferase	0.98	0.70686	-0.0291463	0.150667	unchange	-1.18401	4.54e-05	4.34294	down	unchange-down
RchiOBHmChr7g0179441	RchiOBHm_Chr7g0179441	PREDICTED: reticulon-like protein B9 [Fragaria vesca subsp. vesca]	1.524	NA	0.607863	NA	unchange	-1.76182	0.000732143	3.1354	down	unchange-down
RchiOBHmChr7g0179471	RchiOBHm_Chr7g0179471	Putative bifunctional inhibitor/plant lipid transfer protein/seed storage helical	NA	NA	NA	NA	unchange	-1.95566	5.66e-05	4.24718	down	unchange-down
RchiOBHmChr7g0179911	RchiOBHm_Chr7g0179911	Putative MT-associated protein TORTIFOLIA1/SPIRAL2	NA	NA	NA	NA	unchange	-1.57819	4.81e-16	15.3179	down	unchange-down
RchiOBHmChr7g0180181	RchiOBHm_Chr7g0180181	Putative ATPase, AAA-type, core, AAA-type ATPase domain-containing protein	NA	NA	NA	NA	unchange	-1.03934	1.93e-05	4.71444	down	unchange-down
RchiOBHmChr7g0180641	RchiOBHm_Chr7g0180641	Putative HSP20-like chaperone	0.835	0.10226	-0.260152	0.990294	unchange	-1.42661	0.0134344	1.87178	down	unchange-down
RchiOBHmChr7g0181391	RchiOBHm_Chr7g0181391	Putative gibberellin regulated protein	0.157	NA	-2.67116	NA	unchange	-4.7707	1.55e-100	99.8097	down	unchange-down
RchiOBHmChr7g0181861	RchiOBHm_Chr7g0181861	Putative ribulose-phosphate 3-epimerase	0.944	0.31114	-0.0831412	0.507044	unchange	-1.35681	7.13e-12	11.1469	down	unchange-down
RchiOBHmChr7g0183861	RchiOBHm_Chr7g0183861	Putative hexosyltransferase	0.914	0.89416	-0.129734	0.0485848	unchange	-1.18974	0.00376107	2.42469	down	unchange-down
RchiOBHmChr7g0184071	RchiOBHm_Chr7g0184071	Putative transferase, protein kinase NAK family	0.931	0.1057	-0.103147	0.975925	unchange	-1.21366	8.2e-10	9.08619	down	unchange-down
RchiOBHmChr7g0184091	RchiOBHm_Chr7g0184091	Putative uridine kinase	1.364	0.035579	0.447844	1.44881	unchange	-1.06752	5.78e-07	6.23807	down	unchange-down
RchiOBHmChr7g0184841	RchiOBHm_Chr7g0184841	Putative nepenthesin	1.287	0.056	0.364012	1.25181	unchange	-1.33865	3.87e-08	7.41229	down	unchange-down
RchiOBHmChr7g0186071	RchiOBHm_Chr7g0186071	Putative 3-oxoacyl-[acyl-carrier-protein] synthase 2	0.995	0.69698	-0.00723157	0.15678	unchange	-1.74839	2.95e-08	7.53018	down	unchange-down
RchiOBHmChr7g0186191	RchiOBHm_Chr7g0186191	Putative SWEET sugar transporter	NA	NA	NA	NA	unchange	-1.22481	4.9e-10	9.3098	down	unchange-down
RchiOBHmChr7g0186771	RchiOBHm_Chr7g0186771	Putative molybdate-anion transporter, major facilitator superfamily domain-containing protein	0.863	0.198878	-0.212568	0.701413	unchange	-1.09812	2.09e-08	7.67985	down	unchange-down
RchiOBHmChr7g0186971	RchiOBHm_Chr7g0186971	Putative methionine gamma-lyase	0.745	0.0055819	-0.424688	2.25322	unchange	-2.49223	4.68e-27	26.3298	down	unchange-down
RchiOBHmChr7g0188161	RchiOBHm_Chr7g0188161	Putative transcription factor MYB family	0.661	0.066036	-0.597278	1.18022	unchange	-1.53916	1.29e-14	13.8894	down	unchange-down
RchiOBHmChr7g0188241	RchiOBHm_Chr7g0188241	Putative ClpA/B family, P-loop containing nucleoside triphosphate hydrolase	0.713	0.00080034	-0.488026	3.09673	unchange	-1.27187	6.09e-10	9.21538	down	unchange-down
RchiOBHmChr7g0188571	RchiOBHm_Chr7g0188571	Putative CRAL-TRIO lipid binding domain, CRAL/TRIO domain-containing protein	NA	NA	NA	NA	unchange	-2.48157	1.73e-34	33.762	down	unchange-down
RchiOBHmChr7g0188731	RchiOBHm_Chr7g0188731	Putative RNA recognition motif 2, nucleotide-binding alpha-beta plait domain-containing protein	0.698	0.022703	-0.518701	1.64392	unchange	-1.37039	1.11e-11	10.9547	down	unchange-down
RchiOBHmChr7g0190021	RchiOBHm_Chr7g0190021	PREDICTED: thylakoid lumenal 17.9 kDa protein, chloroplastic [Fragaria vesca subsp. vesca]	NA	NA	NA	NA	unchange	-1.07656	0.00523741	2.28088	down	unchange-down
RchiOBHmChr7g0190031	RchiOBHm_Chr7g0190031	Putative major facilitator superfamily domain-containing protein	NA	NA	NA	NA	unchange	-1.13727	2.09e-08	7.67985	down	unchange-down
RchiOBHmChr7g0190281	RchiOBHm_Chr7g0190281	Putative phosphodiesterase I	NA	NA	NA	NA	unchange	-2.37585	3.44e-05	4.46344	down	unchange-down
RchiOBHmChr7g0192231	RchiOBHm_Chr7g0192231	Putative cytochrome P450	1.043	0.55872	0.0607392	0.252806	unchange	-1.2996	1.03e-09	8.98716	down	unchange-down
RchiOBHmChr7g0192721	RchiOBHm_Chr7g0192721	Putative primary-amine oxidase	1.066	0.31122	0.0922074	0.506933	unchange	-1.60652	6.66e-14	13.1765	down	unchange-down
RchiOBHmChr7g0194931	RchiOBHm_Chr7g0194931	Putative CDP-diacylglycerol--inositol 3-phosphatidyltransferase, Long-chain-fatty-acid--CoA ligase	0.875	0.024936	-0.192645	1.60317	unchange	-1.05501	1.56e-07	6.80688	down	unchange-down
RchiOBHmChr7g0196791	RchiOBHm_Chr7g0196791	Putative galacturan 1,4-alpha-galacturonidase	1.309	0.030683	0.388465	1.5131	unchange	-1.45139	9.34e-11	10.0297	down	unchange-down
RchiOBHmChr7g0196841	RchiOBHm_Chr7g0196841	Putative beta-carotene 3-hydroxylase	NA	NA	NA	NA	unchange	-2.08612	9.27e-15	14.0329	down	unchange-down
RchiOBHmChr7g0198001	RchiOBHm_Chr7g0198001	Putative phospholipid-hydroperoxide glutathione peroxidase	0.929	0.46572	-0.106249	0.331875	unchange	-1.02639	2.12e-07	6.67366	down	unchange-down
RchiOBHmChr7g0199491	RchiOBHm_Chr7g0199491	Putative SPX domain, major facilitator superfamily	0.899	0.46232	-0.153607	0.335057	unchange	-1.18086	4.86e-09	8.31336	down	unchange-down
RchiOBHmChr7g0199641	RchiOBHm_Chr7g0199641	Putative dTDP-4-dehydrorhamnose reductase, dTDP-4-dehydrorhamnose 3,5-epimerase	0.795	0.0065568	-0.330973	2.18331	unchange	-1.4568	7.72e-14	13.1124	down	unchange-down
RchiOBHmChr7g0201401	RchiOBHm_Chr7g0201401	Putative START-like domain, Bet v I type allergen	NA	NA	NA	NA	unchange	-2.66133	1.79e-08	7.74715	down	unchange-down
RchiOBHmChr7g0203681	RchiOBHm_Chr7g0203681	Putative carboxylic ester hydrolase	1.106	0.3951	0.145351	0.403293	unchange	-1.42733	0.0223947	1.64985	down	unchange-down
RchiOBHmChr7g0204981	RchiOBHm_Chr7g0204981	Putative shikimate O-hydroxycinnamoyltransferase	1.246	0.0054199	0.317304	2.26601	unchange	-2.46078	3.5e-20	19.4559	down	unchange-down
RchiOBHmChr7g0208111	RchiOBHm_Chr7g0208111	Putative sugar-terminal-phosphatase	0.855	0.187285	-0.226004	0.727497	unchange	-1.03585	5.08e-05	4.29414	down	unchange-down
RchiOBHmChr7g0211771	RchiOBHm_Chr7g0211771	Putative NAD(P)-binding domain-containing protein	0.911	0.30316	-0.134477	0.518328	unchange	-3.01784	1.53e-51	50.8153	down	unchange-down
RchiOBHmChr7g0211781	RchiOBHm_Chr7g0211781	Putative glycerol-3-phosphate 1-O-acyltransferase	0.835	0.29608	-0.260152	0.528591	unchange	-1.12037	2.27e-08	7.64397	down	unchange-down
RchiOBHmChr7g0214811	RchiOBHm_Chr7g0214811	Putative major facilitator superfamily domain-containing protein	1.217	0.5478	0.283329	0.261378	unchange	-2.38241	1.68e-32	31.7747	down	unchange-down
RchiOBHmChr7g0217991	RchiOBHm_Chr7g0217991	Putative cadmium-transporting ATPase	0.867	0.0146188	-0.205896	1.83509	unchange	-1.08219	3.77e-05	4.42366	down	unchange-down
RchiOBHmChr7g0222011	RchiOBHm_Chr7g0222011	Putative ceramidase	NA	NA	NA	NA	unchange	-1.24062	2.3e-09	8.63827	down	unchange-down
RchiOBHmChr7g0222101	RchiOBHm_Chr7g0222101	Putative 11-S seed storage protein, plant	NA	NA	NA	NA	unchange	-3.10475	5.7e-10	9.24413	down	unchange-down
RchiOBHmChr7g0222781	RchiOBHm_Chr7g0222781	Putative phenol beta-glucosyltransferase	NA	NA	NA	NA	unchange	-1.77339	3.42e-05	4.46597	down	unchange-down
RchiOBHmChr7g0224471	RchiOBHm_Chr7g0224471	PREDICTED: UPF0496 protein 4-like [Fragaria vesca subsp. vesca]	NA	NA	NA	NA	unchange	-1.01902	1.8e-06	5.74473	down	unchange-down
RchiOBHmChr7g0225551	RchiOBHm_Chr7g0225551	Putative glycosidase	NA	NA	NA	NA	unchange	-1.13087	0.0274165	1.56199	down	unchange-down
RchiOBHmChr7g0226501	RchiOBHm_Chr7g0226501	Putative beta-fructofuranosidase	0.936	0.067079	-0.0954196	1.17341	unchange	-1.62572	1.52e-16	15.8182	down	unchange-down
RchiOBHmChr7g0230501	RchiOBHm_Chr7g0230501	Putative alcohol O-acetyltransferase	1.151	0.2239	0.202888	0.649946	unchange	-4.45627	3.41e-58	57.4672	down	unchange-down
RchiOBHmChr7g0232341	RchiOBHm_Chr7g0232341	Putative amino acid transporter, transmembrane domain-containing protein	NA	NA	NA	NA	unchange	-1.85039	2.26e-16	15.6459	down	unchange-down
RchiOBHmChr7g0233171	RchiOBHm_Chr7g0233171	Putative histidine phosphatase superfamily	1.199	0.083378	0.261832	1.07895	unchange	-1.12174	1.78e-08	7.74958	down	unchange-down
RchiOBHmChr7g0235101	RchiOBHm_Chr7g0235101	Putative Heat shock protein 70 family	0.674	0.42512	-0.56918	0.371488	unchange	-2.04451	3.18e-05	4.49757	down	unchange-down
RchiOBHmChr7g0235491	RchiOBHm_Chr7g0235491	Putative trans-aconitate 3-methyltransferase	1.348	0.066338	0.43082	1.17824	unchange	-1.17724	7.02e-08	7.15366	down	unchange-down
RchiOBHmChr7g0235561	RchiOBHm_Chr7g0235561	Putative shikimate O-hydroxycinnamoyltransferase	1.729	0.060859	0.789938	1.21568	unchange	-1.17717	6.46e-08	7.18977	down	unchange-down
RchiOBHmChr7g0239331	RchiOBHm_Chr7g0239331	Putative demethylmenaquinone methyltransferase	1.586	0.100921	0.665393	0.996018	unchange	-2.35285	1.38e-27	26.8601	down	unchange-down
RchiOBHmChr7g0241931	RchiOBHm_Chr7g0241931	Putative beta-N-acetylhexosaminidase	1.071	0.34966	0.0989585	0.456354	unchange	-1.09253	2.25e-06	5.64782	down	unchange-down
RchiOBHmChr7g0242791	RchiOBHm_Chr7g0242791	Putative protein kinase CAMK-OST1L family	1.441	0.0131378	0.52707	1.88148	unchange	-1.71454	4.87e-15	14.3125	down	unchange-down
RchiOBHmChr7g0243761	RchiOBHm_Chr7g0243761	Putative cyanohydrin beta-glucosyltransferase	0.949	0.24938	-0.07552	0.603138	unchange	-1.54615	5.31e-06	5.27491	down	unchange-down
RchiOBHmChr7g0243851	RchiOBHm_Chr7g0243851	Putative nucleotide-binding alpha-beta plait domain-containing protein	0.229	NA	-2.12658	NA	unchange	-2.27747	3.79e-10	9.42136	down	unchange-down

## Sheet: cluster 5
Transcription.ID	Protein.accession	Protein.description	Ratio	P.value	log2FC.x	log10p.x	Regulation.x	log2FC.y	FDR	log10p.y	Regulation.y	type
RchiOBHmCPg0502341	RchiOBHmCPg0502341	photosystem II protein D2 (chloroplast) [Erythranthe lutea]	1.304	0.0152198	0.382944	1.81759	unchange	1.01531	0.0361517	1.44187	up	unchange-up
RchiOBHmChr1g0314321	RchiOBHm_Chr1g0314321	Putative nucleotide-binding alpha-beta plait domain-containing protein	1.022	0.7696	0.0313952	0.113735	unchange	2.35886	2.56e-17	16.5918	up	unchange-up
RchiOBHmChr1g0317061	RchiOBHm_Chr1g0317061	Putative Galactose-binding domain-containing protein	0.996	0.88588	-0.00578235	0.0526251	unchange	2.77251	2.47e-31	30.6073	up	unchange-up
RchiOBHmChr1g0317931	RchiOBHm_Chr1g0317931	Putative caffeate O-methyltransferase	NA	NA	NA	NA	unchange	3.80787	9.72e-09	8.01233	up	unchange-up
RchiOBHmChr1g0321331	RchiOBHm_Chr1g0321331	Putative annexin	0.79	0.118902	-0.340075	0.924811	unchange	2.03457	7.36e-11	10.1331	up	unchange-up
RchiOBHmChr1g0321701	RchiOBHm_Chr1g0321701	Annexin-like protein RJ4	0.966	0.7908	-0.0499049	0.101933	unchange	1.46476	0.00356655	2.44775	up	unchange-up
RchiOBHmChr1g0323241	RchiOBHm_Chr1g0323241	Putative orotate phosphoribosyltransferase, Orotidine-5'-phosphate decarboxylase	0.793	0.056955	-0.334607	1.24447	unchange	1.28759	9.44e-10	9.02503	up	unchange-up
RchiOBHmChr1g0324291	RchiOBHm_Chr1g0324291	Putative formylmethanofuran dehydrogenase, subunit A, metal-dependent hydrolase	0.901	0.5381	-0.150401	0.269137	unchange	2.21751	1.8e-10	9.74473	up	unchange-up
RchiOBHmChr1g0324501	RchiOBHm_Chr1g0324501	Putative START-like domain-containing protein	0.437	NA	-1.19429	NA	unchange	1.1084	0.00569998	2.24413	up	unchange-up
RchiOBHmChr1g0325611	RchiOBHm_Chr1g0325611	Putative endopeptidase La	NA	NA	NA	NA	unchange	2.93749	1.18e-06	5.92812	up	unchange-up
RchiOBHmChr1g0325651	RchiOBHm_Chr1g0325651	Putative nepenthesin	1.06	0.09902	0.0840643	1.00428	unchange	1.35781	6.84e-05	4.16494	up	unchange-up
RchiOBHmChr1g0326431	RchiOBHm_Chr1g0326431	Putative powdery mildew resistance protein, RPW8	3.769	NA	1.91418	NA	unchange	1.15316	1.55e-07	6.80967	up	unchange-up
RchiOBHmChr1g0332431	RchiOBHm_Chr1g0332431	Putative dihydrolipoyllysine-residue acetyltransferase	0.8	0.00075501	-0.321928	3.12205	unchange	1.41319	1.46e-05	4.83565	up	unchange-up
RchiOBHmChr1g0332561	RchiOBHm_Chr1g0332561	Putative dihydrolipoyllysine-residue acetyltransferase	NA	NA	NA	NA	unchange	1.12624	0.0385814	1.41362	up	unchange-up
RchiOBHmChr1g0334861	RchiOBHm_Chr1g0334861	Putative pyruvate kinase	0.947	0.23014	-0.0785637	0.638008	unchange	1.70221	1.12e-10	9.95078	up	unchange-up
RchiOBHmChr1g0336511	RchiOBHm_Chr1g0336511	DNA-binding protein PD2 [Medicago truncatula]	0.967	0.93172	-0.0484122	0.0307146	unchange	1.4905	4.45e-08	7.35164	up	unchange-up
RchiOBHmChr1g0339941	RchiOBHm_Chr1g0339941	Putative flavonol 3-O-glucosyltransferase	1.037	0.97856	0.0524159	0.00941254	unchange	2.15394	5.77e-05	4.23882	up	unchange-up
RchiOBHmChr1g0344071	RchiOBHm_Chr1g0344071	PREDICTED: protein TRIGALACTOSYLDIACYLGLYCEROL 4, chloroplastic [Fragaria vesca subsp. vesca]	0.926	0.45118	-0.110916	0.34565	unchange	2.09941	7.17e-14	13.1445	up	unchange-up
RchiOBHmChr1g0347441	RchiOBHm_Chr1g0347441	Putative palmitoyl-protein hydrolase	1.083	0.34528	0.115033	0.461829	unchange	1.02536	5.31e-06	5.27491	up	unchange-up
RchiOBHmChr1g0349751	RchiOBHm_Chr1g0349751	Putative arginase	1.199	0.0034771	0.261832	2.45878	unchange	1.2317	1.26e-07	6.89963	up	unchange-up
RchiOBHmChr1g0349971	RchiOBHm_Chr1g0349971	Putative 3-phosphoshikimate 1-carboxyvinyltransferase	1.042	0.73702	0.0593553	0.132521	unchange	1.13765	1.9e-07	6.72125	up	unchange-up
RchiOBHmChr1g0350371	RchiOBHm_Chr1g0350371	Putative vestitone reductase	1.634	0.45052	0.708408	0.346286	unchange	1.64906	0.000450227	3.34657	up	unchange-up
RchiOBHmChr1g0350591	RchiOBHm_Chr1g0350591	DUF1499 family protein [Medicago truncatula]	NA	NA	NA	NA	unchange	2.90771	2.85e-06	5.54516	up	unchange-up
RchiOBHmChr1g0350871	RchiOBHm_Chr1g0350871	Putative fasciclin-like arabinogalactan protein	1.079	0.83458	0.109695	0.078532	unchange	2.04938	1.22e-12	11.9136	up	unchange-up
RchiOBHmChr1g0351521	RchiOBHm_Chr1g0351521	Putative oxidoreductase	1.076	0.7137	0.105678	0.146484	unchange	1.10607	0.0133883	1.87327	up	unchange-up
RchiOBHmChr1g0356641	RchiOBHm_Chr1g0356641	L-3-cyanoalanine synthase 1	0.972	0.55992	-0.0409718	0.251874	unchange	1.58037	5.93e-08	7.22695	up	unchange-up
RchiOBHmChr1g0358591	RchiOBHm_Chr1g0358591	Putative alpha-L-fucosidase	0.985	0.872	-0.0218044	0.0594835	unchange	1.91184	4.83e-11	10.3161	up	unchange-up
RchiOBHmChr1g0358711	RchiOBHm_Chr1g0358711	Putative glucan endo-1,3-beta-D-glucosidase	NA	NA	NA	NA	unchange	3.88286	1.15e-62	61.9393	up	unchange-up
RchiOBHmChr1g0359831	RchiOBHm_Chr1g0359831	Putative GTP 3',8-cyclase	NA	NA	NA	NA	unchange	1.76148	0.00897414	2.04701	up	unchange-up
RchiOBHmChr1g0362211	RchiOBHm_Chr1g0362211	Putative pectate lyase	NA	NA	NA	NA	unchange	1.58095	0.00846659	2.07229	up	unchange-up
RchiOBHmChr1g0362951	RchiOBHm_Chr1g0362951	Putative transcription regulator GNAT family	1.061	0.26132	0.0854247	0.582827	unchange	1.20321	5.11e-05	4.29158	up	unchange-up
RchiOBHmChr1g0363641	RchiOBHm_Chr1g0363641	Putative chlorophyll A-B binding protein	1.123	0.87318	0.167358	0.0588962	unchange	2.25387	0.00030771	3.51186	up	unchange-up
RchiOBHmChr1g0364231	RchiOBHm_Chr1g0364231	Putative aminotransferase class IV	1.193	0.078384	0.254594	1.10577	unchange	1.13668	0.000361496	3.4419	up	unchange-up
RchiOBHmChr1g0364481	RchiOBHm_Chr1g0364481	Putative glutathione transferase	NA	NA	NA	NA	unchange	2.21854	5.44e-21	20.2644	up	unchange-up
RchiOBHmChr1g0365751	RchiOBHm_Chr1g0365751	Putative PsbP family protein	0.962	0.70408	-0.0558912	0.152378	unchange	2.96143	1.76e-12	11.7545	up	unchange-up
RchiOBHmChr1g0366531	RchiOBHm_Chr1g0366531	Putative Heat shock protein 70 family	0.975	0.77088	-0.0365259	0.113013	unchange	1.40886	0.0125518	1.9013	up	unchange-up
RchiOBHmChr1g0367971	RchiOBHm_Chr1g0367971	Putative crocetin glucosyltransferase	NA	NA	NA	NA	unchange	2.15054	1.15e-15	14.9393	up	unchange-up
RchiOBHmChr1g0370011	RchiOBHm_Chr1g0370011	Putative chlorophyll A-B binding protein	1.624	0.115815	0.699552	0.936235	unchange	2.19124	3.59e-15	14.4449	up	unchange-up
RchiOBHmChr1g0370251	RchiOBHm_Chr1g0370251	Putative protein kinase RLK-Pelle-CR4L family	NA	NA	NA	NA	unchange	1.43116	0.0110064	1.95836	up	unchange-up
RchiOBHmChr1g0371261	RchiOBHm_Chr1g0371261	Putative protein kinase RLK-Pelle-LRR-III family	1.277	0.075165	0.352759	1.12398	unchange	3.05372	0.000186388	3.72958	up	unchange-up
RchiOBHmChr1g0371621	RchiOBHm_Chr1g0371621	Putative peroxidase	7.847	NA	2.97214	NA	unchange	2.27148	2.02e-14	13.6946	up	unchange-up
RchiOBHmChr1g0373101	RchiOBHm_Chr1g0373101	Putative superoxide dismutase	NA	NA	NA	NA	unchange	5.05695	9.29e-19	18.032	up	unchange-up
RchiOBHmChr1g0373211	RchiOBHm_Chr1g0373211	Putative oxidoreductase	1.05	0.27376	0.0703893	0.56263	unchange	1.04985	1.27e-06	5.8962	up	unchange-up
RchiOBHmChr1g0374521	RchiOBHm_Chr1g0374521	Putative L-ascorbate oxidase	1.349	0.76494	0.43189	0.116373	unchange	1.81786	1.1e-05	4.95861	up	unchange-up
RchiOBHmChr1g0375091	RchiOBHm_Chr1g0375091	Putative phosphopyruvate hydratase	0.764	0.09312	-0.388355	1.03096	unchange	1.04292	2.97e-07	6.52724	up	unchange-up
RchiOBHmChr1g0375231	RchiOBHm_Chr1g0375231	Putative aromatic-amino-acid transaminase, 1-aminocyclopropane-1-carboxylate synthase	1.065	0.0096229	0.0908534	2.01669	unchange	1.74834	3.58e-06	5.44612	up	unchange-up
RchiOBHmChr1g0375841	RchiOBHm_Chr1g0375841	Putative alpha-L-fucosidase	0.945	0.81302	-0.0816138	0.0898988	unchange	1.6791	1.1e-08	7.95861	up	unchange-up
RchiOBHmChr1g0377861	RchiOBHm_Chr1g0377861	Putative very-long-chain 3-oxoacyl-CoA reductase	1.166	0.122942	0.221568	0.9103	unchange	2.30866	2.31e-10	9.63639	up	unchange-up
RchiOBHmChr1g0378551	RchiOBHm_Chr1g0378551	Putative thiomorpholine-carboxylate dehydrogenase	NA	NA	NA	NA	unchange	1.12998	0.00854299	2.06839	up	unchange-up
RchiOBHmChr1g0382411	RchiOBHm_Chr1g0382411	Putative pyridoxine 4-dehydrogenase	NA	NA	NA	NA	unchange	1.1323	4.84e-06	5.31515	up	unchange-up
RchiOBHmChr1g0384371	RchiOBHm_Chr1g0384371	Putative phosphate-induced protein	NA	NA	NA	NA	unchange	1.22374	0.0177529	1.75073	up	unchange-up
RchiOBHmChr2g0084491	RchiOBHm_Chr2g0084491	Putative phosphotransferase with an alcohol group as acceptor	0.747	0.0154394	-0.42082	1.81137	unchange	1.7292	1.3e-09	8.88606	up	unchange-up
RchiOBHmChr2g0084731	RchiOBHm_Chr2g0084731	Putative oxidoreductase	NA	NA	NA	NA	unchange	1.30703	0.000519336	3.28455	up	unchange-up
RchiOBHmChr2g0084921	RchiOBHm_Chr2g0084921	Putative UDP-glucuronosyl/UDP-glucosyltransferase	0.782	0.028964	-0.354759	1.53814	unchange	1.54427	3.3e-05	4.48149	up	unchange-up
RchiOBHmChr2g0085171	RchiOBHm_Chr2g0085171	Putative Rhodanese-like domain-containing protein	1.19	0.0663	0.250962	1.17849	unchange	1.72449	5.42e-11	10.266	up	unchange-up
RchiOBHmChr2g0086051	RchiOBHm_Chr2g0086051	Putative zeaxanthin epoxidase	1.495	0.062679	0.580145	1.20288	unchange	1.08476	6.91e-08	7.16052	up	unchange-up
RchiOBHmChr2g0086421	RchiOBHm_Chr2g0086421	Putative ribonuclease III post-transcriptional gene silencing PAZ-Argonaute family	NA	NA	NA	NA	unchange	1.4699	1.03e-08	7.98716	up	unchange-up
RchiOBHmChr2g0087991	RchiOBHm_Chr2g0087991	Putative cupredoxin	NA	NA	NA	NA	unchange	1.56593	0.00320763	2.49382	up	unchange-up
RchiOBHmChr2g0088401	RchiOBHm_Chr2g0088401	Putative Heat shock protein DnaJ, cysteine-rich	NA	NA	NA	NA	unchange	1.50295	8.91e-10	9.05012	up	unchange-up
RchiOBHmChr2g0090451	RchiOBHm_Chr2g0090451	Putative plus-end-directed kinesin ATPase	0.897	0.2891	-0.15682	0.538952	unchange	1.67987	1.15e-11	10.9393	up	unchange-up
RchiOBHmChr2g0090561	RchiOBHm_Chr2g0090561	PREDICTED: GATA zinc finger domain-containing protein 8-like [Solanum lycopersicum]	NA	NA	NA	NA	unchange	2.37473	8.95e-18	17.0482	up	unchange-up
RchiOBHmChr2g0091021	RchiOBHm_Chr2g0091021	Putative alpha/Beta hydrolase	NA	NA	NA	NA	unchange	3.65458	1.33e-07	6.87615	up	unchange-up
RchiOBHmChr2g0091281	RchiOBHm_Chr2g0091281	Putative translation elongation factor EFTs/EF1B, nucleic acid-binding protein	NA	NA	NA	NA	unchange	1.06935	1.1e-07	6.95861	up	unchange-up
RchiOBHmChr2g0091741	RchiOBHm_Chr2g0091741	Putative malate dehydrogenase (oxaloacetate-decarboxylating) (NADP(+))	1.082	0.034744	0.1137	1.45912	unchange	1.70021	2.13e-17	16.6716	up	unchange-up
RchiOBHmChr2g0091911	RchiOBHm_Chr2g0091911	Putative 23S rRNA (guanosine(2251)-2'-O)-methyltransferase	NA	NA	NA	NA	unchange	1.4225	1.64e-06	5.78516	up	unchange-up
RchiOBHmChr2g0092051	RchiOBHm_Chr2g0092051	Putative glutamate carboxypeptidase	1.394	0.2334	0.479231	0.631899	unchange	1.30437	6.33e-09	8.1986	up	unchange-up
RchiOBHmChr2g0092181	RchiOBHm_Chr2g0092181	Putative glucan endo-1,3-beta-D-glucosidase	0.704	0.154664	-0.506353	0.810611	unchange	1.43893	1.17e-06	5.93181	up	unchange-up
RchiOBHmChr2g0093551	RchiOBHm_Chr2g0093551	Putative feruloyl esterase	0.796	0.4046	-0.32916	0.392974	unchange	1.78684	8.36e-05	4.07779	up	unchange-up
RchiOBHmChr2g0094741	RchiOBHm_Chr2g0094741	Putative germin, rmlC-like cupin domain, rmlC-like jelly roll	NA	NA	NA	NA	unchange	4.4946	1.94e-75	74.7122	up	unchange-up
RchiOBHmChr2g0095781	RchiOBHm_Chr2g0095781	Putative peroxiredoxin	0.329	0.076804	-1.60384	1.11462	unchange	1.13248	1.99e-05	4.70115	up	unchange-up
RchiOBHmChr2g0096371	RchiOBHm_Chr2g0096371	Putative pectinesterase	NA	NA	NA	NA	unchange	2.40068	2.31e-05	4.63639	up	unchange-up
RchiOBHmChr2g0098631	RchiOBHm_Chr2g0098631	Putative peroxidase	NA	NA	NA	NA	unchange	1.71088	1.81e-08	7.74232	up	unchange-up
RchiOBHmChr2g0099331	RchiOBHm_Chr2g0099331	Putative oxidoreductase	0.93	0.35374	-0.104697	0.451316	unchange	1.47844	5.38e-14	13.2692	up	unchange-up
RchiOBHmChr2g0100331	RchiOBHm_Chr2g0100331	Putative soluble epoxide hydrolase	1.955	0.080125	0.967169	1.09623	unchange	1.49692	1.2e-06	5.92082	up	unchange-up
RchiOBHmChr2g0100691	RchiOBHm_Chr2g0100691	Putative ATPase, AAA-type, core, AAA-type ATPase domain-containing protein	NA	NA	NA	NA	unchange	1.29269	0.0081982	2.08628	up	unchange-up
RchiOBHmChr2g0101891	RchiOBHm_Chr2g0101891	anti-muellerian hormone type-2 receptor [Arabidopsis thaliana]	NA	NA	NA	NA	unchange	2.54284	1.22e-08	7.91364	up	unchange-up
RchiOBHmChr2g0103161	RchiOBHm_Chr2g0103161	Putative outer membrane protein/outer membrane enzyme PagP, beta-barrel	1.055	0.23828	0.077243	0.622912	unchange	1.71483	1.26e-09	8.89963	up	unchange-up
RchiOBHmChr2g0104191	RchiOBHm_Chr2g0104191	Putative powdery mildew resistance protein, RPW8	1.071	0.88066	0.0989585	0.0551917	unchange	1.0516	0.0003334	3.47703	up	unchange-up
RchiOBHmChr2g0104801	RchiOBHm_Chr2g0104801	Putative ribosomal protein L25	1.091	0.8494	0.125651	0.0708877	unchange	1.26308	6.66e-06	5.17653	up	unchange-up
RchiOBHmChr2g0107511	RchiOBHm_Chr2g0107511	Putative peroxidase	NA	NA	NA	NA	unchange	2.5586	5.88e-07	6.23062	up	unchange-up
RchiOBHmChr2g0107581	RchiOBHm_Chr2g0107581	Putative formamidase	1.048	0.2373	0.0676387	0.624702	unchange	1.10997	0.00155636	2.80789	up	unchange-up
RchiOBHmChr2g0107911	RchiOBHm_Chr2g0107911	Putative calcium-transporting ATPase	0.744	NA	-0.426625	NA	unchange	3.19145	3.71e-14	13.4306	up	unchange-up
RchiOBHmChr2g0109651	RchiOBHm_Chr2g0109651	Putative oxidoreductase	1.511	0.35358	0.595504	0.451512	unchange	1.02102	0.00638725	2.19469	up	unchange-up
RchiOBHmChr2g0116161	RchiOBHm_Chr2g0116161	Putative cadmium-transporting ATPase	NA	NA	NA	NA	unchange	1.07402	9.7e-07	6.01323	up	unchange-up
RchiOBHmChr2g0120171	RchiOBHm_Chr2g0120171	Putative UMP kinase	NA	NA	NA	NA	unchange	1.78879	5.3e-11	10.2757	up	unchange-up
RchiOBHmChr2g0120891	RchiOBHm_Chr2g0120891	Putative photosystem I	1	0.7896	0	0.102593	unchange	2.12531	1.57e-21	20.8041	up	unchange-up
RchiOBHmChr2g0121051	RchiOBHm_Chr2g0121051	Putative laccase	9.188	NA	3.19975	NA	unchange	2.96187	0.0322195	1.49188	up	unchange-up
RchiOBHmChr2g0121181	RchiOBHm_Chr2g0121181	Putative laccase	NA	NA	NA	NA	unchange	3.80788	1.01e-14	13.9957	up	unchange-up
RchiOBHmChr2g0122591	RchiOBHm_Chr2g0122591	Putative carboxylesterase	NA	NA	NA	NA	unchange	2.90843	2.15e-09	8.66756	up	unchange-up
RchiOBHmChr2g0122891	RchiOBHm_Chr2g0122891	Putative nepenthesin	0.86	0.23142	-0.217591	0.635599	unchange	1.48819	1.09e-09	8.96257	up	unchange-up
RchiOBHmChr2g0123141	RchiOBHm_Chr2g0123141	Putative aldehyde dehydrogenase (NAD(+))	1.177	0.005663	0.235114	2.24695	unchange	2.00351	5.42e-17	16.266	up	unchange-up
RchiOBHmChr2g0123611	RchiOBHm_Chr2g0123611	Putative succinate-semialdehyde dehydrogenase (acetylating)	1.063	0.20242	0.0881416	0.693747	unchange	1.5612	1.97e-07	6.70553	up	unchange-up
RchiOBHmChr2g0125431	RchiOBHm_Chr2g0125431	Putative N-acylneuraminate-9-phosphatase	1.543	0.48722	0.625738	0.312275	unchange	1.18086	0.00502843	2.29857	up	unchange-up
RchiOBHmChr2g0125471	RchiOBHm_Chr2g0125471	Putative glutamate synthase (ferredoxin)	1.128	0.022656	0.173767	1.64482	unchange	1.29533	3.09e-11	10.51	up	unchange-up
RchiOBHmChr2g0125831	RchiOBHm_Chr2g0125831	Putative DNA topoisomerase (ATP-hydrolyzing)	1.271	0.0051599	0.345964	2.28736	unchange	1.18531	3.18e-07	6.49757	up	unchange-up
RchiOBHmChr2g0126111	RchiOBHm_Chr2g0126111	Ribulose bisphosphate carboxylase small chain	1.348	0.0607	0.43082	1.21681	unchange	2.43208	4.15e-24	23.382	up	unchange-up
RchiOBHmChr2g0126551	RchiOBHm_Chr2g0126551	Putative Two pore calcium channel protein	NA	NA	NA	NA	unchange	1.38794	0.0181078	1.74213	up	unchange-up
RchiOBHmChr2g0127661	RchiOBHm_Chr2g0127661	Putative mitochondrial carrier protein	1.147	0.49564	0.197865	0.304834	unchange	1.10507	2.87e-08	7.54212	up	unchange-up
RchiOBHmChr2g0130711	RchiOBHm_Chr2g0130711	Putative ribosomal protein L5	0.694	0.11762	-0.526992	0.929519	unchange	1.00421	0.000127678	3.89388	up	unchange-up
RchiOBHmChr2g0132161	RchiOBHm_Chr2g0132161	nuclear protein [Arabidopsis thaliana]	1.061	0.22484	0.0854247	0.648126	unchange	1.80492	8.61e-07	6.065	up	unchange-up
RchiOBHmChr2g0132911	RchiOBHm_Chr2g0132911	PREDICTED: protein LOW PSII ACCUMULATION 3, chloroplastic [Fragaria vesca subsp. vesca]	0.69	0.196741	-0.535332	0.706105	unchange	1.20187	6.37e-06	5.19586	up	unchange-up
RchiOBHmChr2g0134871	RchiOBHm_Chr2g0134871	Putative haloalkane dehalogenase	1.154	0.11934	0.206643	0.923214	unchange	1.64553	2.68e-05	4.57187	up	unchange-up
RchiOBHmChr2g0138931	RchiOBHm_Chr2g0138931	Putative photosystem I PsaH, reaction centre subunit VI, single alpha-helix	1.724	0.052483	0.78576	1.27998	unchange	2.97592	5.75e-17	16.2403	up	unchange-up
RchiOBHmChr2g0143341	RchiOBHm_Chr2g0143341	Putative chaperonin Cpn60/TCP-1 family, groEL-like apical domain, groEL-like equatorial	1.262	0.0047764	0.335712	2.3209	unchange	1.26282	2.54e-07	6.59517	up	unchange-up
RchiOBHmChr2g0143571	RchiOBHm_Chr2g0143571	Putative glyoxylate reductase (NADP(+))	1.305	0.082679	0.38405	1.0826	unchange	1.84443	4.6e-08	7.33724	up	unchange-up
RchiOBHmChr2g0143711	RchiOBHm_Chr2g0143711	Putative IQ motif, EF-hand binding protein	NA	NA	NA	NA	unchange	2.90739	1.04e-12	11.983	up	unchange-up
RchiOBHmChr2g0145011	RchiOBHm_Chr2g0145011	Putative carboxylesterase	0.886	0.2117	-0.174621	0.674279	unchange	3.14541	1.47e-09	8.83268	up	unchange-up
RchiOBHmChr2g0146211	RchiOBHm_Chr2g0146211	Putative von Willebrand factor, type A	0.699	0.0115042	-0.516636	1.93914	unchange	1.04738	9.8e-05	4.00877	up	unchange-up
RchiOBHmChr2g0149071	RchiOBHm_Chr2g0149071	Putative transcription regulator mTERF family	NA	NA	NA	NA	unchange	1.26514	0.00280886	2.55147	up	unchange-up
RchiOBHmChr2g0149841	RchiOBHm_Chr2g0149841	Putative calcium-transporting ATPase	0.825	0.050397	-0.277534	1.2976	unchange	1.1306	9.29e-09	8.03198	up	unchange-up
RchiOBHmChr2g0150831	RchiOBHm_Chr2g0150831	Putative leucine-rich repeat domain, L domain-containing protein	0.648	0.12766	-0.625934	0.893945	unchange	3.28645	0.000182183	3.73949	up	unchange-up
RchiOBHmChr2g0152011	RchiOBHm_Chr2g0152011	Putative 3-hydroxyisobutyryl-CoA hydrolase	0.846	0.0102996	-0.24127	1.98718	unchange	1.29832	0.000120552	3.91883	up	unchange-up
RchiOBHmChr2g0152481	RchiOBHm_Chr2g0152481	Putative PsbP family protein	1.114	0.34838	0.155749	0.457947	unchange	2.41	2.2e-21	20.6576	up	unchange-up
RchiOBHmChr2g0158971	RchiOBHm_Chr2g0158971	Putative laccase	1.478	0.027657	0.563646	1.55819	unchange	1.94443	3.17e-23	22.4989	up	unchange-up
RchiOBHmChr2g0162381	RchiOBHm_Chr2g0162381	Putative photosystem II Pbs27	1.095	0.35682	0.130931	0.447551	unchange	2.45271	9.05e-16	15.0434	up	unchange-up
RchiOBHmChr2g0163151	RchiOBHm_Chr2g0163151	Putative allene-oxide cyclase	0.957	0.18188	-0.0634092	0.740215	unchange	4.47106	1.73e-08	7.76195	up	unchange-up
RchiOBHmChr2g0163831	RchiOBHm_Chr2g0163831	Putative hydro-lyase	1.128	0.196363	0.173767	0.70694	unchange	1.56009	4.6e-06	5.33724	up	unchange-up
RchiOBHmChr2g0165161	RchiOBHm_Chr2g0165161	Putative UDP-arabinopyranose mutase	NA	NA	NA	NA	unchange	2.49069	0.0214432	1.66871	up	unchange-up
RchiOBHmChr2g0165301	RchiOBHm_Chr2g0165301	Putative protein kinase RLK-Pelle-CrRLK1L-1 family	NA	NA	NA	NA	unchange	1.45384	5.8e-10	9.23657	up	unchange-up
RchiOBHmChr2g0165351	RchiOBHm_Chr2g0165351	Putative protein kinase RLK-Pelle-CrRLK1L-1 family	NA	NA	NA	NA	unchange	1.11184	0.0133758	1.87368	up	unchange-up
RchiOBHmChr2g0165841	RchiOBHm_Chr2g0165841	hydroxyproline-rich protein, putative [Medicago truncatula]	NA	NA	NA	NA	unchange	3.68451	8.25e-15	14.0835	up	unchange-up
RchiOBHmChr2g0166661	RchiOBHm_Chr2g0166661	PREDICTED: tRNA (guanosine(18)-2'-O)-methyltransferase-like [Prunus mume]	NA	NA	NA	NA	unchange	1.02682	0.00818011	2.08724	up	unchange-up
RchiOBHmChr2g0166771	RchiOBHm_Chr2g0166771	Putative NAD(P)-binding domain-containing protein	1.01	0.67618	0.0143553	0.169938	unchange	1.11019	0.0126066	1.8994	up	unchange-up
RchiOBHmChr2g0168331	RchiOBHm_Chr2g0168331	Putative starch synthase	0.906	0.118659	-0.142417	0.925699	unchange	1.05448	0.00171633	2.7654	up	unchange-up
RchiOBHmChr2g0168751	RchiOBHm_Chr2g0168751	Putative tubulin	0.7	0.00079721	-0.514573	3.09843	unchange	2.45559	2.04e-14	13.6904	up	unchange-up
RchiOBHmChr2g0169231	RchiOBHm_Chr2g0169231	Putative proton-exporting ATPase	1.432	0.42934	0.518031	0.367199	unchange	2.3061	1.03e-16	15.9872	up	unchange-up
RchiOBHmChr2g0169241	RchiOBHm_Chr2g0169241	Putative phosphotransferase with a phosphate group as acceptor	NA	NA	NA	NA	unchange	1.66166	2.05e-08	7.68825	up	unchange-up
RchiOBHmChr2g0170581	RchiOBHm_Chr2g0170581	Putative heavy metal-associated domain, HMA	0.767	0.020437	-0.382702	1.68958	unchange	1.47618	6.23e-07	6.20551	up	unchange-up
RchiOBHmChr2g0171381	RchiOBHm_Chr2g0171381	Putative peptidylprolyl isomerase	1.048	0.39994	0.0676387	0.398005	unchange	1.14182	2.43e-05	4.61439	up	unchange-up
RchiOBHmChr2g0172181	RchiOBHm_Chr2g0172181	Putative Dual specificity protein phosphatase 12	0.941	0.39382	-0.0877334	0.404702	unchange	1.17714	0.000250519	3.60116	up	unchange-up
RchiOBHmChr2g0172601	RchiOBHm_Chr2g0172601	Putative polyribonucleotide nucleotidyltransferase	1.08	0.52662	0.111031	0.278503	unchange	1.1379	1.24e-05	4.90658	up	unchange-up
RchiOBHmChr2g0175271	RchiOBHm_Chr2g0175271	Putative cupredoxin	NA	NA	NA	NA	unchange	2.66383	0.000195122	3.70969	up	unchange-up
RchiOBHmChr2g0176091	RchiOBHm_Chr2g0176091	PREDICTED: pollen-specific protein-like At4g18596 [Juglans regia]	0.767	0.05792	-0.382702	1.23717	unchange	2.75564	0.000991969	3.0035	up	unchange-up
RchiOBHmChr2g0176471	RchiOBHm_Chr2g0176471	Putative alpha-mannosidase	1.03	0.6114	0.0426443	0.213675	unchange	1.6158	8.39e-14	13.0762	up	unchange-up
RchiOBHmChr2g0176741	RchiOBHm_Chr2g0176741	Putative oxidoreductase	1.144	0.081041	0.194087	1.0913	unchange	3.6275	2.8e-34	33.5528	up	unchange-up
RchiOBHmChr3g0447921	RchiOBHm_Chr3g0447921	Putative photosystem I	NA	NA	NA	NA	unchange	1.53368	2.97e-06	5.52724	up	unchange-up
RchiOBHmChr3g0448431	RchiOBHm_Chr3g0448431	Putative protoporphyrin ferrochelatase	1.137	0.110236	0.185232	0.957677	unchange	1.53676	6.12e-10	9.21325	up	unchange-up
RchiOBHmChr3g0450041	RchiOBHm_Chr3g0450041	Putative peptidylprolyl isomerase	1.095	0.221	0.130931	0.655608	unchange	1.80527	7.1e-11	10.1487	up	unchange-up
RchiOBHmChr3g0451421	RchiOBHm_Chr3g0451421	Putative ribose-5-phosphate isomerase	1.051	0.5853	0.0717627	0.232621	unchange	2.01017	2.15e-12	11.6676	up	unchange-up
RchiOBHmChr3g0453141	RchiOBHm_Chr3g0453141	Putative shikimate dehydrogenase, 3-dehydroquinate dehydratase	0.677	0.0044352	-0.562772	2.35309	unchange	1.44947	1.18e-08	7.92812	up	unchange-up
RchiOBHmChr3g0454061	RchiOBHm_Chr3g0454061	Putative Acid phosphatase	0.983	0.71798	-0.0247367	0.143888	unchange	1.48359	5.44e-07	6.2644	up	unchange-up
RchiOBHmChr3g0454411	RchiOBHm_Chr3g0454411	Putative amidase	0.895	0.083224	-0.16004	1.07975	unchange	1.11912	0.00828107	2.08191	up	unchange-up
RchiOBHmChr3g0454491	RchiOBHm_Chr3g0454491	Putative amidase	1.019	0.82484	0.0271541	0.0836303	unchange	4.30412	3.46e-07	6.46092	up	unchange-up
RchiOBHmChr3g0455121	RchiOBHm_Chr3g0455121	Putative linoleate 9S-lipoxygenase	0.834	0.0037189	-0.261881	2.42959	unchange	1.14842	0.000572689	3.24208	up	unchange-up
RchiOBHmChr3g0455491	RchiOBHm_Chr3g0455491	Putative transcription factor Hap3/NF-YB family	NA	NA	NA	NA	unchange	1.11817	3.57e-06	5.44733	up	unchange-up
RchiOBHmChr3g0456491	RchiOBHm_Chr3g0456491	Putative sulfate-transporting ATPase	NA	NA	NA	NA	unchange	1.08122	0.0187954	1.72595	up	unchange-up
RchiOBHmChr3g0457511	RchiOBHm_Chr3g0457511	Putative xaa-Pro aminopeptidase	1.098	0.155623	0.134878	0.807926	unchange	1.32246	1.46e-05	4.83565	up	unchange-up
RchiOBHmChr3g0457751	RchiOBHm_Chr3g0457751	Putative alpha-L-fucosidase	1.439	0.0094413	0.525067	2.02497	unchange	2.42807	1.33e-13	12.8761	up	unchange-up
RchiOBHmChr3g0457961	RchiOBHm_Chr3g0457961	Putative glucose-6-phosphate dehydrogenase (NADP(+))	1.069	0.16108	0.0962619	0.792958	unchange	1.08355	2.3e-05	4.63827	up	unchange-up
RchiOBHmChr3g0458541	RchiOBHm_Chr3g0458541	Putative phytepsin	1.78	NA	0.831877	NA	unchange	2.62233	0.000297353	3.52673	up	unchange-up
RchiOBHmChr3g0459231	RchiOBHm_Chr3g0459231	Putative pentatricopeptide	NA	NA	NA	NA	unchange	2.02469	7.26e-06	5.13906	up	unchange-up
RchiOBHmChr3g0459391	RchiOBHm_Chr3g0459391	Putative protein-serine/threonine kinase CMGC-CDK-Pl family	NA	NA	NA	NA	unchange	2.63063	1.92e-19	18.7167	up	unchange-up
RchiOBHmChr3g0461001	RchiOBHm_Chr3g0461001	Putative peroxidase	NA	NA	NA	NA	unchange	2.89132	5.56e-21	20.2549	up	unchange-up
RchiOBHmChr3g0461661	RchiOBHm_Chr3g0461661	Putative protein kinase RLK-Pelle-LRR-III family	0.821	0.023537	-0.284546	1.62825	unchange	2.91057	2.73e-19	18.5638	up	unchange-up
RchiOBHmChr3g0463241	RchiOBHm_Chr3g0463241	Putative chlorophyll A-B binding protein	1.023	0.75602	0.0328061	0.121467	unchange	1.34282	0.0470148	1.32777	up	unchange-up
RchiOBHmChr3g0463721	RchiOBHm_Chr3g0463721	Putative shikimate O-hydroxycinnamoyltransferase	0.979	0.75918	-0.0306192	0.119655	unchange	1.03451	0.0386975	1.41232	up	unchange-up
RchiOBHmChr3g0464121	RchiOBHm_Chr3g0464121	Putative purine-nucleoside phosphorylase	0.74	0.0182177	-0.434403	1.73951	unchange	1.69757	2.91e-18	17.5361	up	unchange-up
RchiOBHmChr3g0464191	RchiOBHm_Chr3g0464191	Putative fructose-bisphosphatase	1.219	0.0174557	0.285698	1.75806	unchange	3.10974	1.92e-32	31.7167	up	unchange-up
RchiOBHmChr3g0464771	RchiOBHm_Chr3g0464771	Putative galactose oxidase	1.326	0.053457	0.407081	1.272	unchange	1.23651	0.000338942	3.46987	up	unchange-up
RchiOBHmChr3g0469861	RchiOBHm_Chr3g0469861	Phenylalanine ammonia-lyase 1	NA	NA	NA	NA	unchange	1.3456	8.1e-05	4.09151	up	unchange-up
RchiOBHmChr3g0470461	RchiOBHm_Chr3g0470461	Putative xyloglucan:xyloglucosyl transferase	NA	NA	NA	NA	unchange	3.21644	4.17e-51	50.3799	up	unchange-up
RchiOBHmChr3g0470981	RchiOBHm_Chr3g0470981	Putative thaumatin	NA	NA	NA	NA	unchange	5.4449	1.21e-57	56.9172	up	unchange-up
RchiOBHmChr3g0471611	RchiOBHm_Chr3g0471611	Putative RNA-directed RNA polymerase	NA	NA	NA	NA	unchange	1.4124	5.45e-05	4.2636	up	unchange-up
RchiOBHmChr3g0473601	RchiOBHm_Chr3g0473601	PREDICTED: thylakoid lumenal 19 kDa protein, chloroplastic [Fragaria vesca subsp. vesca]	NA	NA	NA	NA	unchange	1.68482	1.32e-12	11.8794	up	unchange-up
RchiOBHmChr3g0474771	RchiOBHm_Chr3g0474771	Putative transcription factor WD40-like family	1.353	NA	0.436162	NA	unchange	2.15015	0.00100764	2.99669	up	unchange-up
RchiOBHmChr3g0475661	RchiOBHm_Chr3g0475661	Putative Late embryogenesis abundant protein, LEA-14	NA	NA	NA	NA	unchange	2.65635	0.00331866	2.47904	up	unchange-up
RchiOBHmChr3g0475921	RchiOBHm_Chr3g0475921	Putative protein kinase RLK-Pelle-LRR-IX family	NA	NA	NA	NA	unchange	1.44616	4.58e-11	10.3391	up	unchange-up
RchiOBHmChr3g0480311	RchiOBHm_Chr3g0480311	Putative Rhodanese-like domain-containing protein	1.266	0.102942	0.340277	0.987407	unchange	2.26403	5.3e-11	10.2757	up	unchange-up
RchiOBHmChr3g0481221	RchiOBHm_Chr3g0481221	Putative acyl-CoA oxidase	NA	NA	NA	NA	unchange	1.133	0.0131073	1.88249	up	unchange-up
RchiOBHmChr3g0482101	RchiOBHm_Chr3g0482101	Putative Galactose-binding domain-containing protein	NA	NA	NA	NA	unchange	2.42998	1.81e-09	8.74232	up	unchange-up
RchiOBHmChr3g0483011	RchiOBHm_Chr3g0483011	PREDICTED: methionine--tRNA ligase, chloroplastic/mitochondrial [Prunus mume]	1.135	0.0099371	0.182692	2.00274	unchange	1.03291	1.98e-05	4.70333	up	unchange-up
RchiOBHmChr3g0484171	RchiOBHm_Chr3g0484171	Putative glucan endo-1,3-beta-D-glucosidase	NA	NA	NA	NA	unchange	2.45918	1.01e-35	34.9957	up	unchange-up
RchiOBHmChr3g0484251	RchiOBHm_Chr3g0484251	Putative glucan endo-1,3-beta-D-glucosidase	NA	NA	NA	NA	unchange	1.89735	0.000832382	3.07968	up	unchange-up
RchiOBHmChr3g0485621	RchiOBHm_Chr3g0485621	Putative pectinacetylesterase/NOTUM	0.933	0.48842	-0.100051	0.311207	unchange	2.17306	1.42e-10	9.84771	up	unchange-up
RchiOBHmChr3g0488771	RchiOBHm_Chr3g0488771	Putative expansin/Lol pI	0.807	0.58328	-0.309359	0.234123	unchange	1.47377	1.83e-05	4.73755	up	unchange-up
RchiOBHmChr3g0490581	RchiOBHm_Chr3g0490581	Putative glucan endo-1,3-beta-D-glucosidase	0.94	0.75904	-0.0892673	0.119735	unchange	1.41259	0.000128798	3.89009	up	unchange-up
RchiOBHmChr3g0491191	RchiOBHm_Chr3g0491191	Putative glutamine synthetase	0.774	0.0076825	-0.369595	2.1145	unchange	1.12505	1.32e-08	7.87943	up	unchange-up
RchiOBHmChr3g0491591	RchiOBHm_Chr3g0491591	PREDICTED: methionyl-tRNA formyltransferase, mitochondrial [Fragaria vesca subsp. vesca]	0.983	0.58554	-0.0247367	0.232443	unchange	1.13662	0.000194211	3.71173	up	unchange-up
RchiOBHmChr3g0491651	RchiOBHm_Chr3g0491651	Putative nepenthesin	NA	NA	NA	NA	unchange	1.71644	3.43e-06	5.46471	up	unchange-up
RchiOBHmChr3g0493051	RchiOBHm_Chr3g0493051	Putative glutathione dehydrogenase (ascorbate)	1.091	0.094881	0.125651	1.02282	unchange	1.07247	0.000143392	3.84348	up	unchange-up
RchiOBHmChr3g0493091	RchiOBHm_Chr3g0493091	Putative transmembrane protein	0.257	0.071264	-1.96016	1.14713	unchange	1.08191	2.56e-07	6.59176	up	unchange-up
RchiOBHmChr3g0494361	RchiOBHm_Chr3g0494361	Putative magnesium-protoporphyrin IX monomethyl ester (oxidative) cyclase	0.894	0.079601	-0.161653	1.09908	unchange	1.21171	2.74e-05	4.56225	up	unchange-up
RchiOBHmChr3g0494961	RchiOBHm_Chr3g0494961	Putative cytochrome P450	1.523	0.2112	0.606916	0.675306	unchange	1.66799	5.19e-11	10.2848	up	unchange-up
RchiOBHmChr3g0495211	RchiOBHm_Chr3g0495211	Putative dihydrofolate reductase	0.793	0.049183	-0.334607	1.30818	unchange	2.66705	0.016789	1.77498	up	unchange-up
RchiOBHmChr3g0495741	RchiOBHm_Chr3g0495741	Putative cysteine synthase	NA	NA	NA	NA	unchange	1.69382	5.51e-08	7.25885	up	unchange-up
RchiOBHmChr3g0496111	RchiOBHm_Chr3g0496111	Putative polyribonucleotide nucleotidyltransferase	NA	NA	NA	NA	unchange	1.99053	5.37e-15	14.27	up	unchange-up
RchiOBHmChr3g0496871	RchiOBHm_Chr3g0496871	Putative superoxide dismutase	0.881	0.193625	-0.182786	0.713039	unchange	1.04006	3.17e-06	5.49894	up	unchange-up
RchiOBHmChr3g0497191	RchiOBHm_Chr3g0497191	ARM repeat protein [Medicago truncatula]	NA	NA	NA	NA	unchange	1.89531	7.76e-06	5.11014	up	unchange-up
RchiOBHmChr4g0389561	RchiOBHm_Chr4g0389561	Putative CASTOR/POLLUX/SYM8 ion channels	0.712	0.075323	-0.490051	1.12307	unchange	1.27609	3.37e-08	7.47237	up	unchange-up
RchiOBHmChr4g0389671	RchiOBHm_Chr4g0389671	Putative tripeptidyl-peptidase II	1.176	0.5336	0.233888	0.272784	unchange	1.23765	0.000690203	3.16102	up	unchange-up
RchiOBHmChr4g0390271	RchiOBHm_Chr4g0390271	Putative DNA-directed RNA polymerase	NA	NA	NA	NA	unchange	1.04872	0.00155636	2.80789	up	unchange-up
RchiOBHmChr4g0393031	RchiOBHm_Chr4g0393031	Putative flavonol 3-O-glucosyltransferase	0.911	0.27254	-0.134477	0.56457	unchange	2.47041	3.26e-06	5.48678	up	unchange-up
RchiOBHmChr4g0393301	RchiOBHm_Chr4g0393301	Putative aldo/keto reductase, NADP-dependent oxidoreductase domain-containing protein	1.228	0.15446	0.296311	0.811184	unchange	1.16507	0.000972871	3.01194	up	unchange-up
RchiOBHmChr4g0394701	RchiOBHm_Chr4g0394701	Putative cyanase transcription factor Lambda-DB family	0.842	0.040844	-0.248108	1.38887	unchange	1.2507	1.65e-07	6.78252	up	unchange-up
RchiOBHmChr4g0394971	RchiOBHm_Chr4g0394971	Putative ribosomal protein L10P	NA	NA	NA	NA	unchange	1.21763	0.0190172	1.72085	up	unchange-up
RchiOBHmChr4g0395451	RchiOBHm_Chr4g0395451	Putative nucleotide-binding alpha-beta plait domain-containing protein	2.588	NA	1.37184	NA	unchange	2.14586	5.79e-09	8.23732	up	unchange-up
RchiOBHmChr4g0396391	RchiOBHm_Chr4g0396391	Putative glutathione transferase	NA	NA	NA	NA	unchange	1.84194	1.07e-07	6.97062	up	unchange-up
RchiOBHmChr4g0398131	RchiOBHm_Chr4g0398131	Putative phospholipase A(2)	NA	NA	NA	NA	unchange	1.19393	0.00011895	3.92464	up	unchange-up
RchiOBHmChr4g0398291	RchiOBHm_Chr4g0398291	Putative peptidase S10, serine carboxypeptidase, alpha/Beta hydrolase	1.013	0.86856	0.0186342	0.0612002	unchange	1.18562	0.000348968	3.45721	up	unchange-up
RchiOBHmChr4g0398631	RchiOBHm_Chr4g0398631	Putative xyloglucan:xyloglucosyl transferase	NA	NA	NA	NA	unchange	4.82772	9.81e-108	107.008	up	unchange-up
RchiOBHmChr4g0402501	RchiOBHm_Chr4g0402501	Putative nepenthesin	NA	NA	NA	NA	unchange	2.18358	1.23e-11	10.9101	up	unchange-up
RchiOBHmChr4g0403051	RchiOBHm_Chr4g0403051	Putative adenosylmethionine--8-amino-7-oxononanoate transaminase, Dethiobiotin synthase	1.127	0.0177032	0.172488	1.75195	unchange	1.65695	0.000777405	3.10935	up	unchange-up
RchiOBHmChr4g0404641	RchiOBHm_Chr4g0404641	Putative alpha,alpha-trehalose-phosphate synthase (UDP-forming), Trehalose-phosphatase	0.579	NA	-0.788365	NA	unchange	2.17193	8.78e-16	15.0565	up	unchange-up
RchiOBHmChr4g0406221	RchiOBHm_Chr4g0406221	Putative chitinase	NA	NA	NA	NA	unchange	4.37447	1.36e-92	91.8665	up	unchange-up
RchiOBHmChr4g0406231	RchiOBHm_Chr4g0406231	Putative chitinase	NA	NA	NA	NA	unchange	3.27848	3.38e-50	49.4711	up	unchange-up
RchiOBHmChr4g0408131	RchiOBHm_Chr4g0408131	Putative biotin synthase	0.744	0.0155995	-0.426625	1.80689	unchange	1.03726	0.000542429	3.26566	up	unchange-up
RchiOBHmChr4g0409791	RchiOBHm_Chr4g0409791	Putative pectinesterase	NA	NA	NA	NA	unchange	4.4202	1.2e-38	37.9208	up	unchange-up
RchiOBHmChr4g0411011	RchiOBHm_Chr4g0411011	Putative perakine reductase	0.945	0.43152	-0.0816138	0.364999	unchange	2.2731	2.36e-21	20.6271	up	unchange-up
RchiOBHmChr4g0411541	RchiOBHm_Chr4g0411541	Putative powdery mildew resistance protein, RPW8	0.781	0.0118766	-0.356606	1.92531	unchange	1.20381	5.81e-06	5.23582	up	unchange-up
RchiOBHmChr4g0412101	RchiOBHm_Chr4g0412101	Putative plus-end-directed kinesin ATPase	NA	NA	NA	NA	unchange	1.90099	9.34e-11	10.0297	up	unchange-up
RchiOBHmChr4g0412651	RchiOBHm_Chr4g0412651	Putative xyloglucan:xyloglucosyl transferase, Xyloglucan-specific endo-beta-1,4-glucanase	2.88	0.071283	1.52607	1.14701	unchange	1.16584	0.0103552	1.98484	up	unchange-up
RchiOBHmChr4g0414931	RchiOBHm_Chr4g0414931	Putative galacturan 1,4-alpha-galacturonidase	NA	NA	NA	NA	unchange	3.46292	8.19e-08	7.08672	up	unchange-up
RchiOBHmChr4g0414961	RchiOBHm_Chr4g0414961	Putative galacturan 1,4-alpha-galacturonidase	1.231	0.6435	0.299831	0.191451	unchange	3.90096	1.38e-45	44.8601	up	unchange-up
RchiOBHmChr4g0417331	RchiOBHm_Chr4g0417331	Putative glucose-1-phosphate adenylyltransferase	1.168	0.166325	0.22404	0.779042	unchange	1.75508	0.000113699	3.94424	up	unchange-up
RchiOBHmChr4g0418571	RchiOBHm_Chr4g0418571	Putative alpha/Beta hydrolase	0.645	0.136176	-0.632629	0.865899	unchange	2.11924	3.2e-05	4.49485	up	unchange-up
RchiOBHmChr4g0418581	RchiOBHm_Chr4g0418581	Putative alpha/Beta hydrolase	0.65	0.180338	-0.621488	0.743913	unchange	1.18406	0.0371099	1.43051	up	unchange-up
RchiOBHmChr4g0419011	RchiOBHm_Chr4g0419011	Putative glutamine synthetase	1.038	0.40892	0.0538064	0.388362	unchange	2.03058	9.72e-25	24.0123	up	unchange-up
RchiOBHmChr4g0420851	RchiOBHm_Chr4g0420851	Putative protein kinase ULK-ULK4 family	NA	NA	NA	NA	unchange	1.64562	2.39e-07	6.6216	up	unchange-up
RchiOBHmChr4g0422271	RchiOBHm_Chr4g0422271	PREDICTED: isoleucine--tRNA ligase, mitochondrial [Fragaria vesca subsp. vesca]	0.29	0.07676	-1.78588	1.11487	unchange	1.48213	4.76e-09	8.32239	up	unchange-up
RchiOBHmChr4g0429311	RchiOBHm_Chr4g0429311	Putative GRAM domain-containing protein	1.549	0.197942	0.631337	0.703462	unchange	1.5362	0.001204	2.91937	up	unchange-up
RchiOBHmChr4g0429611	RchiOBHm_Chr4g0429611	Putative hydrolase	0.913	0.101478	-0.131313	0.993628	unchange	1.27593	0.000463629	3.33383	up	unchange-up
RchiOBHmChr4g0429651	RchiOBHm_Chr4g0429651	Putative 4-sulfomuconolactone hydrolase	1.03	0.47058	0.0426443	0.327367	unchange	1.05613	0.00016373	3.78587	up	unchange-up
RchiOBHmChr4g0432681	RchiOBHm_Chr4g0432681	Putative 4-hydroxyphenylacetaldehyde oxime monooxygenase	NA	NA	NA	NA	unchange	1.10696	0.000905672	3.04303	up	unchange-up
RchiOBHmChr4g0432761	RchiOBHm_Chr4g0432761	Putative transferase	1.493	0.00146041	0.578214	2.83553	unchange	1.5682	2.43e-15	14.6144	up	unchange-up
RchiOBHmChr4g0432971	RchiOBHm_Chr4g0432971	Putative phosphate transporter	1.103	0.15192	0.141433	0.818385	unchange	1.11106	7.5e-05	4.12494	up	unchange-up
RchiOBHmChr4g0433451	RchiOBHm_Chr4g0433451	Putative alpha-L-fucosidase	0.747	0.072521	-0.42082	1.13954	unchange	2.96666	9.67e-16	15.0146	up	unchange-up
RchiOBHmChr4g0434941	RchiOBHm_Chr4g0434941	Putative oleoyl-[acyl-carrier-protein] hydrolase	0.729	NA	-0.456009	NA	unchange	1.21358	0.0376542	1.42419	up	unchange-up
RchiOBHmChr4g0435151	RchiOBHm_Chr4g0435151	Putative ribulose-bisphosphate carboxylase	1.088	0.20498	0.121679	0.688289	unchange	2.23473	3.06e-07	6.51428	up	unchange-up
RchiOBHmChr4g0435161	RchiOBHm_Chr4g0435161	fiber protein Fb34 [Medicago truncatula]	0.685	0.26936	-0.545824	0.569667	unchange	1.08366	2.06e-06	5.68613	up	unchange-up
RchiOBHmChr4g0435281	RchiOBHm_Chr4g0435281	Putative glycosidase	1.3	0.0025597	0.378512	2.59181	unchange	2.20134	8.84e-27	26.0535	up	unchange-up
RchiOBHmChr4g0435761	RchiOBHm_Chr4g0435761	Putative methionyl aminopeptidase	0.432	NA	-1.2109	NA	unchange	1.96514	5.74e-10	9.24109	up	unchange-up
RchiOBHmChr4g0435911	RchiOBHm_Chr4g0435911	Putative nepenthesin	0.976	0.87262	-0.0350469	0.0591748	unchange	2.47779	0.000134126	3.87249	up	unchange-up
RchiOBHmChr4g0437161	RchiOBHm_Chr4g0437161	Putative hexosyltransferase	1.337	0.00101534	0.418999	2.99339	unchange	2.84625	9.03e-30	29.0443	up	unchange-up
RchiOBHmChr4g0438291	RchiOBHm_Chr4g0438291	Putative phosphodiesterase I	NA	NA	NA	NA	unchange	1.14221	0.000316612	3.49947	up	unchange-up
RchiOBHmChr4g0438671	RchiOBHm_Chr4g0438671	Putative glycogen phosphorylase	1.065	0.123703	0.0908534	0.90762	unchange	1.78547	1.18e-14	13.9281	up	unchange-up
RchiOBHmChr4g0439111	RchiOBHm_Chr4g0439111	Putative phosphatidylethanolamine-binding protein	1.87	0.32166	0.903038	0.492603	unchange	1.4414	0.0193008	1.71442	up	unchange-up
RchiOBHmChr4g0439211	RchiOBHm_Chr4g0439211	Putative [Ribulose-bisphosphate carboxylase]-lysine N-methyltransferase	0.984	0.74592	-0.0232698	0.127308	unchange	2.62913	1.54e-16	15.8125	up	unchange-up
RchiOBHmChr4g0440881	RchiOBHm_Chr4g0440881	Putative membrane transport protein	NA	NA	NA	NA	unchange	1.12954	1.31e-06	5.88273	up	unchange-up
RchiOBHmChr4g0442761	RchiOBHm_Chr4g0442761	Putative aspartate-semialdehyde dehydrogenase	1.019	0.39986	0.0271541	0.398092	unchange	1.78419	9.25e-08	7.03386	up	unchange-up
RchiOBHmChr4g0443881	RchiOBHm_Chr4g0443881	Putative oxidoreductase	0.949	0.33674	-0.07552	0.472705	unchange	3.84304	2.47e-28	27.6073	up	unchange-up
RchiOBHmChr4g0443991	RchiOBHm_Chr4g0443991	Putative xyloglucan:xyloglucosyl transferase	6.782	NA	2.76171	NA	unchange	1.23704	0.00117147	2.93127	up	unchange-up
RchiOBHmChr4g0444001	RchiOBHm_Chr4g0444001	Putative oxidoreductase	NA	NA	NA	NA	unchange	4.11792	5.12e-58	57.2907	up	unchange-up
RchiOBHmChr4g0444351	RchiOBHm_Chr4g0444351	Putative transcription regulator GNAT family	0.613	NA	-0.706041	NA	unchange	1.05704	0.00272062	2.56533	up	unchange-up
RchiOBHmChr4g0444361	RchiOBHm_Chr4g0444361	Putative PMR5 domain, PC-Esterase	0.624	0.20586	-0.680382	0.686428	unchange	2.35672	1.62e-09	8.79048	up	unchange-up
RchiOBHmChr4g0446671	RchiOBHm_Chr4g0446671	Putative transcription factor WD40-like family	1.151	0.061938	0.202888	1.20804	unchange	2.1297	4.44e-25	24.3526	up	unchange-up
RchiOBHmChr4g0447041	RchiOBHm_Chr4g0447041	Putative Porin domain-containing protein	1.171	0.37452	0.227741	0.426525	unchange	1.63267	8.44e-07	6.07366	up	unchange-up
RchiOBHmChr4g0447121	RchiOBHm_Chr4g0447121	Putative tetratricopeptide-like helical domain-containing protein	1.124	0.31368	0.168642	0.503513	unchange	1.19009	5.68e-09	8.24565	up	unchange-up
RchiOBHmChr4g0447241	RchiOBHm_Chr4g0447241	Putative alpha-galactosidase	1.221	0.29602	0.288063	0.528679	unchange	2.13848	2.48e-09	8.60555	up	unchange-up
RchiOBHmChr5g0000601	RchiOBHm_Chr5g0000601	Putative oligopeptide transporter, OPT superfamily	1.468	0.028119	0.553852	1.551	unchange	1.0351	2.13e-07	6.67162	up	unchange-up
RchiOBHmChr5g0001021	RchiOBHm_Chr5g0001021	Putative cytochrome b561 and DOMON domain-containing protein	0.735	0.061502	-0.444184	1.21111	unchange	2.28136	3e-05	4.52288	up	unchange-up
RchiOBHmChr5g0001031	RchiOBHm_Chr5g0001031	Putative phosphoric monoester hydrolase	1.01	0.98066	0.0143553	0.00848154	unchange	2.17574	1.43e-13	12.8447	up	unchange-up
RchiOBHmChr5g0002651	RchiOBHm_Chr5g0002651	Putative aminomethyltransferase	0.789	0.0182387	-0.341903	1.73901	unchange	1.7924	1.29e-19	18.8894	up	unchange-up
RchiOBHmChr5g0002961	RchiOBHm_Chr5g0002961	Putative H(+)-transporting two-sector ATPase	1.156	0.092817	0.209141	1.03237	unchange	2.90063	1.48e-38	37.8297	up	unchange-up
RchiOBHmChr5g0004501	RchiOBHm_Chr5g0004501	Putative oxygen-evolving enhancer protein	1.279	0.127142	0.355016	0.895711	unchange	2.04296	1.27e-07	6.8962	up	unchange-up
RchiOBHmChr5g0004611	RchiOBHm_Chr5g0004611	Putative anthocyanidin reductase ((2R,3R)-flavan-3-ol-forming)	0.924	0.26246	-0.114035	0.580937	unchange	1.12536	0.000317669	3.49803	up	unchange-up
RchiOBHmChr5g0004781	RchiOBHm_Chr5g0004781	Putative pentatricopeptide	1.012	0.81102	0.0172093	0.0909684	unchange	1.11103	0.00105677	2.97602	up	unchange-up
RchiOBHmChr5g0006751	RchiOBHm_Chr5g0006751	Putative nuclease S(1)	NA	NA	NA	NA	unchange	2.4781	1.04e-30	29.983	up	unchange-up
RchiOBHmChr5g0007741	RchiOBHm_Chr5g0007741	fiber protein Fb34 [Medicago truncatula]	1.02	NA	0.0285692	NA	unchange	1.21029	0.000117989	3.92816	up	unchange-up
RchiOBHmChr5g0008741	RchiOBHm_Chr5g0008741	Putative ribosomal protein S5	NA	NA	NA	NA	unchange	1.1673	2.86e-06	5.54363	up	unchange-up
RchiOBHmChr5g0008871	RchiOBHm_Chr5g0008871	Putative transcription factor SBP family	NA	NA	NA	NA	unchange	1.74201	3.8e-06	5.42022	up	unchange-up
RchiOBHmChr5g0008961	RchiOBHm_Chr5g0008961	Putative transferase	NA	NA	NA	NA	unchange	1.54271	4.18e-12	11.3788	up	unchange-up
RchiOBHmChr5g0009281	RchiOBHm_Chr5g0009281	Putative triose phosphate/phosphoenolpyruvate translocator, sugar phosphate transporter	0.91	NA	-0.136062	NA	unchange	1.04405	5.21e-06	5.28316	up	unchange-up
RchiOBHmChr5g0010061	RchiOBHm_Chr5g0010061	Putative magnesium chelatase	0.727	0.0027833	-0.459973	2.55544	unchange	1.26637	2.58e-09	8.58838	up	unchange-up
RchiOBHmChr5g0010391	RchiOBHm_Chr5g0010391	Putative fruit bromelain	1.408	0.0066581	0.493647	2.17665	unchange	2.01979	7.26e-15	14.1391	up	unchange-up
RchiOBHmChr5g0010401	RchiOBHm_Chr5g0010401	Putative fruit bromelain	NA	NA	NA	NA	unchange	2.80694	1.35e-06	5.86967	up	unchange-up
RchiOBHmChr5g0012531	RchiOBHm_Chr5g0012531	Putative triacylglycerol lipase	2.063	0.26312	1.04474	0.579846	unchange	2.87524	7.22e-09	8.14146	up	unchange-up
RchiOBHmChr5g0013551	RchiOBHm_Chr5g0013551	Putative aldolase-type TIM barrel	0.918	0.71984	-0.123434	0.142764	unchange	1.38595	4.1e-06	5.38722	up	unchange-up
RchiOBHmChr5g0013971	RchiOBHm_Chr5g0013971	Putative Galactose-binding domain-containing protein	0.806	0.031362	-0.311148	1.5036	unchange	1.73851	8.5e-10	9.07058	up	unchange-up
RchiOBHmChr5g0015001	RchiOBHm_Chr5g0015001	Putative calcium-dependent channel, 7TM region phosphate	1.105	0.59486	0.144046	0.225585	unchange	1.34768	0.0117716	1.92916	up	unchange-up
RchiOBHmChr5g0015701	RchiOBHm_Chr5g0015701	Putative leucine-rich repeat domain, L domain-containing protein	0.714	0.00171971	-0.486004	2.76454	unchange	1.12726	3.21e-08	7.49349	up	unchange-up
RchiOBHmChr5g0017931	RchiOBHm_Chr5g0017931	Putative tetrahydroberberine oxidase	1.028	0.4931	0.0398403	0.307065	unchange	1.15318	0.0183092	1.73733	up	unchange-up
RchiOBHmChr5g0018181	RchiOBHm_Chr5g0018181	Putative CRAL-TRIO lipid binding domain, GOLD domain, CRAL/TRIO domain-containing protein	NA	NA	NA	NA	unchange	1.46757	1.32e-10	9.87943	up	unchange-up
RchiOBHmChr5g0018491	RchiOBHm_Chr5g0018491	Putative tripeptidyl-peptidase II	0.726	0.083238	-0.461959	1.07968	unchange	1.19819	1.79e-05	4.74715	up	unchange-up
RchiOBHmChr5g0018581	RchiOBHm_Chr5g0018581	Putative alpha-glucosidase	0.982	0.59212	-0.0262051	0.22759	unchange	1.18499	4.78e-07	6.32057	up	unchange-up
RchiOBHmChr5g0019301	RchiOBHm_Chr5g0019301	Putative HAD-like domain-containing protein	0.99	0.99518	-0.0144996	0.00209836	unchange	1.4575	3.46e-06	5.46092	up	unchange-up
RchiOBHmChr5g0022501	RchiOBHm_Chr5g0022501	Putative S-adenosyl-L-methionine-dependent methyltransferase	1.018	0.84872	0.0257376	0.0712356	unchange	3.32797	8.92e-15	14.0496	up	unchange-up
RchiOBHmChr5g0022531	RchiOBHm_Chr5g0022531	Putative fatty-acyl-CoA-transporting ATPase	0.887	NA	-0.172994	NA	unchange	1.98546	7.97e-11	10.0985	up	unchange-up
RchiOBHmChr5g0022981	RchiOBHm_Chr5g0022981	Putative calycin	0.702	0.3814	-0.510457	0.418619	unchange	1.05627	0.00570869	2.24346	up	unchange-up
RchiOBHmChr5g0023391	RchiOBHm_Chr5g0023391	Putative succinate-semialdehyde dehydrogenase (NAD(+))	1.026	0.34312	0.0370307	0.464554	unchange	1.39905	5.61e-12	11.251	up	unchange-up
RchiOBHmChr5g0023561	RchiOBHm_Chr5g0023561	Putative IMP dehydrogenase	1.386	NA	0.470927	NA	unchange	1.16524	0.0282274	1.54933	up	unchange-up
RchiOBHmChr5g0024541	RchiOBHm_Chr5g0024541	Putative phosphoglycerate kinase	0.898	0.130322	-0.155213	0.884982	unchange	1.40584	6.03e-13	12.2197	up	unchange-up
RchiOBHmChr5g0025831	RchiOBHm_Chr5g0025831	Putative sedoheptulose-bisphosphatase	NA	NA	NA	NA	unchange	2.77911	3.87e-09	8.41229	up	unchange-up
RchiOBHmChr5g0026421	RchiOBHm_Chr5g0026421	Putative winged helix-turn-helix DNA-binding domain, toll-like receptor	1.113	0.71678	0.154454	0.144614	unchange	2.12122	0.000126207	3.89892	up	unchange-up
RchiOBHmChr5g0027021	RchiOBHm_Chr5g0027021	Putative photosystem II PsbR	0.618	0.160897	-0.694321	0.793452	unchange	1.24919	4.21e-07	6.37572	up	unchange-up
RchiOBHmChr5g0027901	RchiOBHm_Chr5g0027901	Putative 9-cis-epoxycarotenoid dioxygenase	NA	NA	NA	NA	unchange	2.44846	0.00107032	2.97049	up	unchange-up
RchiOBHmChr5g0027981	RchiOBHm_Chr5g0027981	Putative gibberellin 2-beta-dioxygenase	3.873	NA	1.95345	NA	unchange	1.41165	0.00162583	2.78892	up	unchange-up
RchiOBHmChr5g0029911	RchiOBHm_Chr5g0029911	Putative protein kinase RLK-Pelle-DLSV family	1.275	NA	0.350497	NA	unchange	1.0107	0.00120361	2.91951	up	unchange-up
RchiOBHmChr5g0030471	RchiOBHm_Chr5g0030471	Putative NADPH:quinone reductase	1.18	0.43028	0.238787	0.366249	unchange	1.61233	9.75e-09	8.011	up	unchange-up
RchiOBHmChr5g0031521	RchiOBHm_Chr5g0031521	Putative AAA domain-containing protein, R3H	NA	NA	NA	NA	unchange	1.01876	0.000153132	3.81493	up	unchange-up
RchiOBHmChr5g0032841	RchiOBHm_Chr5g0032841	Putative protein-serine/threonine phosphatase	0.716	0.0079031	-0.481969	2.1022	unchange	1.20866	2.65e-05	4.57675	up	unchange-up
RchiOBHmChr5g0033181	RchiOBHm_Chr5g0033181	EMB2737 [Arabidopsis lyrata subsp. lyrata]	0.854	0.37304	-0.227692	0.428245	unchange	1.85642	1.01e-12	11.9957	up	unchange-up
RchiOBHmChr5g0033741	RchiOBHm_Chr5g0033741	PREDICTED: metallothionein-like protein type 3 [Pyrus x bretschneideri]	NA	NA	NA	NA	unchange	1.02676	0.00036498	3.43773	up	unchange-up
RchiOBHmChr5g0034611	RchiOBHm_Chr5g0034611	Putative lanthionine synthetase C	0.735	0.100176	-0.444184	0.999236	unchange	1.24576	0.0015562	2.80793	up	unchange-up
RchiOBHmChr5g0034621	RchiOBHm_Chr5g0034621	Putative protochlorophyllide reductase	0.84	0.121563	-0.251539	0.915199	unchange	1.63352	0.000653327	3.18487	up	unchange-up
RchiOBHmChr5g0034961	RchiOBHm_Chr5g0034961	Putative peptidylprolyl isomerase	0.74	0.35548	-0.434403	0.449185	unchange	1.29487	0.00166443	2.77873	up	unchange-up
RchiOBHmChr5g0036781	RchiOBHm_Chr5g0036781	Putative protein kinase RLK-Pelle-DLSV family	0.519	0.139639	-0.946194	0.854993	unchange	1.07408	0.0178218	1.74905	up	unchange-up
RchiOBHmChr5g0038161	RchiOBHm_Chr5g0038161	Putative peptidylprolyl isomerase	NA	NA	NA	NA	unchange	2.71164	4.31e-05	4.36552	up	unchange-up
RchiOBHmChr5g0041541	RchiOBHm_Chr5g0041541	Putative peptidylprolyl isomerase	0.815	0.00069551	-0.295128	3.1577	unchange	1.69729	1.39e-13	12.857	up	unchange-up
RchiOBHmChr5g0041551	RchiOBHm_Chr5g0041551	Putative microtubule-associated protein, MAP65/Ase1/PRC1	0.669	0.0030205	-0.579922	2.51992	unchange	1.25767	9e-06	5.04576	up	unchange-up
RchiOBHmChr5g0046661	RchiOBHm_Chr5g0046661	Putative xenobiotic-transporting ATPase	0.67	0.020922	-0.577767	1.6794	unchange	2.08222	0.000101495	3.99356	up	unchange-up
RchiOBHmChr5g0049851	RchiOBHm_Chr5g0049851	Putative zeaxanthin epoxidase	1.05	0.37496	0.0703893	0.426015	unchange	1.32063	4.02e-07	6.39577	up	unchange-up
RchiOBHmChr5g0051031	RchiOBHm_Chr5g0051031	Putative BURP domain-containing protein	NA	NA	NA	NA	unchange	3.6922	2.91e-11	10.5361	up	unchange-up
RchiOBHmChr5g0051871	RchiOBHm_Chr5g0051871	Putative proteasome component Ecm29	NA	NA	NA	NA	unchange	2.13762	0.000680051	3.16746	up	unchange-up
RchiOBHmChr5g0052391	RchiOBHm_Chr5g0052391	PREDICTED: cingulin isoform X2 [Fragaria vesca subsp. vesca]	NA	NA	NA	NA	unchange	1.66279	0.0056593	2.24724	up	unchange-up
RchiOBHmChr5g0053461	RchiOBHm_Chr5g0053461	Putative hydrolase	NA	NA	NA	NA	unchange	2.62188	2.91e-09	8.53611	up	unchange-up
RchiOBHmChr5g0055001	RchiOBHm_Chr5g0055001	PREDICTED: stress-response A/B barrel domain-containing protein At5g22580-like [Malus domestica]	1.06	0.171759	0.0840643	0.76508	unchange	2.86734	2.42e-05	4.61618	up	unchange-up
RchiOBHmChr5g0055111	RchiOBHm_Chr5g0055111	Putative xenobiotic-transporting ATPase	0.64	NA	-0.643856	NA	unchange	2.22585	0.000126403	3.89824	up	unchange-up
RchiOBHmChr5g0060661	RchiOBHm_Chr5g0060661	Putative enoyl-CoA hydratase 2	NA	NA	NA	NA	unchange	1.75969	0.000111292	3.95354	up	unchange-up
RchiOBHmChr5g0061751	RchiOBHm_Chr5g0061751	Putative mitogen-activated protein kinase CMGC-MAPK family	NA	NA	NA	NA	unchange	1.0383	0.0019826	2.70276	up	unchange-up
RchiOBHmChr5g0065301	RchiOBHm_Chr5g0065301	Putative expansin/Lol pI	1.487	NA	0.572405	NA	unchange	3.83989	1.23e-22	21.9101	up	unchange-up
RchiOBHmChr5g0066321	RchiOBHm_Chr5g0066321	Putative ATPase, AAA-type, core, P-loop containing nucleoside triphosphate hydrolase	1.182	0.22418	0.24123	0.649403	unchange	1.2348	4.59e-10	9.33819	up	unchange-up
RchiOBHmChr5g0066371	RchiOBHm_Chr5g0066371	Putative NAD(P)-binding domain-containing protein	0.983	0.84042	-0.0247367	0.0755036	unchange	3.19856	0.00273812	2.56255	up	unchange-up
RchiOBHmChr5g0069141	RchiOBHm_Chr5g0069141	Putative villin/Gelsolin, ADF-H/Gelsolin-like domain-containing protein	0.93	0.086305	-0.104697	1.06396	unchange	1.04593	2.59e-06	5.5867	up	unchange-up
RchiOBHmChr5g0071341	RchiOBHm_Chr5g0071341	Putative indole-3-acetate beta-glucosyltransferase	0.906	0.9984	-0.142417	0.000695428	unchange	1.08971	0.000174352	3.75857	up	unchange-up
RchiOBHmChr5g0072371	RchiOBHm_Chr5g0072371	Putative peroxidase	1.243	0.26758	0.313826	0.572546	unchange	5.23996	2.36e-53	52.6271	up	unchange-up
RchiOBHmChr5g0073371	RchiOBHm_Chr5g0073371	Putative RNA helicase	0.896	0.024063	-0.158429	1.61865	unchange	1.00324	8.85e-05	4.05306	up	unchange-up
RchiOBHmChr5g0074011	RchiOBHm_Chr5g0074011	Putative magnesium-protoporphyrin IX monomethyl ester (oxidative) cyclase	0.974	0.84762	-0.0380063	0.0717988	unchange	1.54727	6.63e-08	7.17849	up	unchange-up
RchiOBHmChr5g0075371	RchiOBHm_Chr5g0075371	Putative fructose-bisphosphate aldolase	NA	NA	NA	NA	unchange	3.29834	1.94e-08	7.7122	up	unchange-up
RchiOBHmChr5g0076471	RchiOBHm_Chr5g0076471	Putative thioredoxin-like ferredoxin	0.881	0.0128819	-0.182786	1.89002	unchange	1.05326	3.7e-05	4.4318	up	unchange-up
RchiOBHmChr5g0077371	RchiOBHm_Chr5g0077371	PREDICTED: tRNA uridine 5-carboxymethylaminomethyl modification enzyme MnmG-like [Malus domestica]	0.84	0.42986	-0.251539	0.366673	unchange	1.12963	0.00295263	2.52979	up	unchange-up
RchiOBHmChr5g0078061	RchiOBHm_Chr5g0078061	Putative linoleate 13S-lipoxygenase	1.059	0.67296	0.0827026	0.172011	unchange	2.73997	2.79e-05	4.5544	up	unchange-up
RchiOBHmChr5g0078121	RchiOBHm_Chr5g0078121	Putative C2 domain, phosphoribosyltransferase	1.053	0.72496	0.0745054	0.139686	unchange	1.63114	8.63e-05	4.06399	up	unchange-up
RchiOBHmChr5g0080751	RchiOBHm_Chr5g0080751	Putative peroxidase	26.34	NA	4.71918	NA	unchange	2.0483	2.8e-05	4.55284	up	unchange-up
RchiOBHmChr5g0081461	RchiOBHm_Chr5g0081461	Putative plant disease resistance response protein	1.018	0.89506	0.0257376	0.0481479	unchange	1.01371	0.00710115	2.14867	up	unchange-up
RchiOBHmChr5g0083121	RchiOBHm_Chr5g0083121	Putative glucan endo-1,3-beta-D-glucosidase	NA	NA	NA	NA	unchange	1.8873	2.04e-08	7.69037	up	unchange-up
RchiOBHmChr5g0083181	RchiOBHm_Chr5g0083181	Putative pheophorbide a oxygenase	NA	NA	NA	NA	unchange	1.13551	0.000561998	3.25027	up	unchange-up
RchiOBHmChr6g0244021	RchiOBHm_Chr6g0244021	Putative tripeptidyl-peptidase II	0.909	0.062943	-0.137648	1.20105	unchange	1.08951	0.000553227	3.2571	up	unchange-up
RchiOBHmChr6g0245961	RchiOBHm_Chr6g0245961	Putative phosphoric monoester hydrolase	1.636	0.5368	0.710173	0.270187	unchange	1.79948	2.22e-11	10.6536	up	unchange-up
RchiOBHmChr6g0246321	RchiOBHm_Chr6g0246321	Putative malate dehydrogenase	NA	NA	NA	NA	unchange	5.39256	9.27e-85	84.0329	up	unchange-up
RchiOBHmChr6g0248941	RchiOBHm_Chr6g0248941	Putative peptidase S10, serine carboxypeptidase, alpha/Beta hydrolase	0.843	0.4229	-0.246395	0.373762	unchange	2.60563	0.00107451	2.96879	up	unchange-up
RchiOBHmChr6g0249091	RchiOBHm_Chr6g0249091	Putative peptidase S10, serine carboxypeptidase, alpha/Beta hydrolase	0.905	0.153779	-0.14401	0.813103	unchange	1.60733	0.00161404	2.79208	up	unchange-up
RchiOBHmChr6g0249351	RchiOBHm_Chr6g0249351	Putative rmlC-like jelly roll protein	NA	NA	NA	NA	unchange	3.706	8.86e-12	11.0526	up	unchange-up
RchiOBHmChr6g0250421	RchiOBHm_Chr6g0250421	Putative protein-disulfide reductase chromatin regulator PHD family	0.747	0.0004573	-0.42082	3.3398	unchange	1.02321	2.24e-07	6.64975	up	unchange-up
RchiOBHmChr6g0250471	RchiOBHm_Chr6g0250471	Putative Galactose-binding domain, SUN domain-containing protein	1.238	0.29856	0.308011	0.524968	unchange	1.12821	1.2e-05	4.92082	up	unchange-up
RchiOBHmChr6g0251791	RchiOBHm_Chr6g0251791	Putative transcription factor WD40-like family	1.202	0.0047403	0.265437	2.32419	unchange	1.07805	5.15e-05	4.28819	up	unchange-up
RchiOBHmChr6g0252491	RchiOBHm_Chr6g0252491	Putative peptidase S10, serine carboxypeptidase, alpha/Beta hydrolase	0.776	0.021777	-0.365871	1.662	unchange	2.54928	8.08e-07	6.09259	up	unchange-up
RchiOBHmChr6g0254541	RchiOBHm_Chr6g0254541	Putative glycosidase	1.099	0.109717	0.136191	0.959726	unchange	1.69347	3.54e-07	6.451	up	unchange-up
RchiOBHmChr6g0255151	RchiOBHm_Chr6g0255151	Putative chitinase	NA	NA	NA	NA	unchange	3.67118	1.91e-59	58.719	up	unchange-up
RchiOBHmChr6g0255411	RchiOBHm_Chr6g0255411	Putative SGNH hydrolase-type esterase domain-containing protein	2.906	0.44576	1.53903	0.350899	unchange	1.67997	0.0115421	1.93772	up	unchange-up
RchiOBHmChr6g0255421	RchiOBHm_Chr6g0255421	Putative SGNH hydrolase-type esterase domain-containing protein	1.149	0.054199	0.200379	1.26601	unchange	1.18934	0.0409788	1.38744	up	unchange-up
RchiOBHmChr6g0258291	RchiOBHm_Chr6g0258291	Putative carboxylesterase	1.17	0.196596	0.226509	0.706425	unchange	1.75004	0.0011878	2.92526	up	unchange-up
RchiOBHmChr6g0259011	RchiOBHm_Chr6g0259011	PREDICTED: armadillo repeat-containing protein 6 [Fragaria vesca subsp. vesca]	1.357	0.29056	0.440421	0.536764	unchange	1.0087	0.000147256	3.83193	up	unchange-up
RchiOBHmChr6g0262291	RchiOBHm_Chr6g0262291	Putative NAD(P)-binding domain-containing protein	0.914	0.2784	-0.129734	0.555331	unchange	1.55357	1.16e-08	7.93554	up	unchange-up
RchiOBHmChr6g0264131	RchiOBHm_Chr6g0264131	Putative glucan endo-1,3-beta-D-glucosidase	1.314	0.023502	0.393965	1.6289	unchange	2.07661	4.12e-20	19.3851	up	unchange-up
RchiOBHmChr6g0266021	RchiOBHm_Chr6g0266021	Putative carboxylesterase	1.196	0.104819	0.258217	0.97956	unchange	3.36871	5.11e-16	15.2916	up	unchange-up
RchiOBHmChr6g0267391	RchiOBHm_Chr6g0267391	Putative COX15/CtaA family protein	NA	NA	NA	NA	unchange	1.11927	0.0026188	2.5819	up	unchange-up
RchiOBHmChr6g0267981	RchiOBHm_Chr6g0267981	Putative flavanone 4-reductase	1.009	0.90478	0.0129262	0.043457	unchange	1.6229	0.000185875	3.73078	up	unchange-up
RchiOBHmChr6g0268361	RchiOBHm_Chr6g0268361	Putative transcription factor bZIP family	0.583	0.085198	-0.778432	1.06957	unchange	1.33839	0.0202069	1.6945	up	unchange-up
RchiOBHmChr6g0269391	RchiOBHm_Chr6g0269391	Putative PB1 domain-containing protein	1.153	0.190341	0.205393	0.720468	unchange	1.02199	2.85e-07	6.54516	up	unchange-up
RchiOBHmChr6g0272391	RchiOBHm_Chr6g0272391	Putative alpha-galactosidase	1.054	0.43822	0.0758749	0.358308	unchange	3.29878	1.3e-26	25.8861	up	unchange-up
RchiOBHmChr6g0272981	RchiOBHm_Chr6g0272981	Putative transferase, protein kinase RLK-Pelle-LRR-II family	0.687	NA	-0.541618	NA	unchange	1.56456	9.58e-14	13.0186	up	unchange-up
RchiOBHmChr6g0273241	RchiOBHm_Chr6g0273241	Putative laccase	NA	NA	NA	NA	unchange	2.0712	0.000136816	3.86386	up	unchange-up
RchiOBHmChr6g0273651	RchiOBHm_Chr6g0273651	Putative laccase	NA	NA	NA	NA	unchange	2.56314	9.07e-07	6.04239	up	unchange-up
RchiOBHmChr6g0274191	RchiOBHm_Chr6g0274191	Putative alliin lyase	1.141	0.195162	0.190299	0.709605	unchange	2.39688	0.000795939	3.09912	up	unchange-up
RchiOBHmChr6g0275381	RchiOBHm_Chr6g0275381	Putative transcription factor WD40-like family	NA	NA	NA	NA	unchange	1.45336	1.97e-05	4.70553	up	unchange-up
RchiOBHmChr6g0277801	RchiOBHm_Chr6g0277801	Putative small monomeric GTPase	1.214	0.117803	0.279768	0.928844	unchange	1.09134	0.000198104	3.70311	up	unchange-up
RchiOBHmChr6g0279541	RchiOBHm_Chr6g0279541	Putative signal-recognition-particle GTPase	1	0.99176	0	0.00359341	unchange	2.59822	4.49e-18	17.3478	up	unchange-up
RchiOBHmChr6g0280291	RchiOBHm_Chr6g0280291	Putative flavin-containing monooxygenase	0.72	0.020061	-0.473931	1.69765	unchange	1.84816	6.69e-14	13.1746	up	unchange-up
RchiOBHmChr6g0280861	RchiOBHm_Chr6g0280861	Putative phosphate-induced protein	2.177	0.074303	1.12234	1.12899	unchange	1.49028	0.0198816	1.70155	up	unchange-up
RchiOBHmChr6g0282691	RchiOBHm_Chr6g0282691	Putative L-ascorbate oxidase	NA	NA	NA	NA	unchange	1.74045	1.9e-08	7.72125	up	unchange-up
RchiOBHmChr6g0283571	RchiOBHm_Chr6g0283571	Putative glucan endo-1,3-beta-D-glucosidase	0.954	0.8401	-0.0679388	0.075669	unchange	2.07347	1.69e-05	4.77211	up	unchange-up
RchiOBHmChr6g0283691	RchiOBHm_Chr6g0283691	Putative NADPH:quinone reductase	1.179	0.021405	0.237564	1.66948	unchange	1.30624	8.39e-10	9.07624	up	unchange-up
RchiOBHmChr6g0285101	RchiOBHm_Chr6g0285101	Putative pantoate--beta-alanine ligase (AMP-forming)	0.822	0.058637	-0.28279	1.23183	unchange	2.02366	1.74e-07	6.75945	up	unchange-up
RchiOBHmChr6g0285181	RchiOBHm_Chr6g0285181	Putative acetyl-CoA C-acyltransferase	0.894	0.031583	-0.161653	1.50055	unchange	1.27979	0.00314276	2.50269	up	unchange-up
RchiOBHmChr6g0285501	RchiOBHm_Chr6g0285501	Putative chaperonin Cpn60/TCP-1 family, groEL-like apical domain, groEL-like equatorial	1.183	0.0137793	0.24245	1.86077	unchange	1.05427	1.51e-07	6.82102	up	unchange-up
RchiOBHmChr6g0285791	RchiOBHm_Chr6g0285791	Putative glutathione transferase	NA	NA	NA	NA	unchange	2.87112	1.29e-14	13.8894	up	unchange-up
RchiOBHmChr6g0286561	RchiOBHm_Chr6g0286561	Putative photosystem II Psb28, class 1	NA	NA	NA	NA	unchange	1.60128	2.66e-08	7.57512	up	unchange-up
RchiOBHmChr6g0286581	RchiOBHm_Chr6g0286581	Putative aminopyrimidine aminohydrolase	1.908	NA	0.932061	NA	unchange	1.46366	5.13e-08	7.28988	up	unchange-up
RchiOBHmChr6g0289811	RchiOBHm_Chr6g0289811	Putative EF-hand domain pair protein	NA	NA	NA	NA	unchange	1.90627	9.25e-05	4.03386	up	unchange-up
RchiOBHmChr6g0291071	RchiOBHm_Chr6g0291071	Putative aldolase-type TIM barrel, P-loop containing nucleoside triphosphate hydrolase	1.083	0.57538	0.115033	0.240045	unchange	1.00943	2.2e-05	4.65758	up	unchange-up
RchiOBHmChr6g0291301	RchiOBHm_Chr6g0291301	Putative nepenthesin	NA	NA	NA	NA	unchange	1.72898	6.18e-09	8.20901	up	unchange-up
RchiOBHmChr6g0291371	RchiOBHm_Chr6g0291371	Putative trans-2,3-dihydro-3-hydroxyanthranilate isomerase	0.833	0.0161216	-0.263612	1.79259	unchange	1.09959	0.00102764	2.98816	up	unchange-up
RchiOBHmChr6g0293301	RchiOBHm_Chr6g0293301	Putative glutathione transferase	0.823	0.003617	-0.281036	2.44165	unchange	1.63568	0.00262754	2.58045	up	unchange-up
RchiOBHmChr6g0294361	RchiOBHm_Chr6g0294361	Putative sucrose synthase	1.387	0.0031569	0.471968	2.50074	unchange	1.04918	0.000612231	3.21308	up	unchange-up
RchiOBHmChr6g0295151	RchiOBHm_Chr6g0295151	Putative multi antimicrobial extrusion protein	1.3	0.032675	0.378512	1.48578	unchange	1.06251	1.55e-05	4.80967	up	unchange-up
RchiOBHmChr6g0295631	RchiOBHm_Chr6g0295631	Putative LysM domain-containing protein	1.151	NA	0.202888	NA	unchange	1.15724	3.56e-05	4.44855	up	unchange-up
RchiOBHmChr6g0295831	RchiOBHm_Chr6g0295831	Putative chlorophyll A-B binding protein	1.353	0.044544	0.436162	1.35121	unchange	2.95435	3.12e-46	45.5058	up	unchange-up
RchiOBHmChr6g0296031	RchiOBHm_Chr6g0296031	Putative O-methyltransferase COMT-type, S-adenosyl-L-methionine-dependent methyltransferase	0.832	0.0046152	-0.265345	2.33581	unchange	1.37392	5.22e-12	11.2823	up	unchange-up
RchiOBHmChr6g0296231	RchiOBHm_Chr6g0296231	Putative nepenthesin	0.786	0.58618	-0.347399	0.231969	unchange	1.21492	2.41e-08	7.61798	up	unchange-up
RchiOBHmChr6g0296441	RchiOBHm_Chr6g0296441	Putative transcription factor WD40-like family	1.183	0.198763	0.24245	0.701664	unchange	1.69943	9.93e-18	17.0031	up	unchange-up
RchiOBHmChr6g0297431	RchiOBHm_Chr6g0297431	Putative transcription factor WD40-like family	NA	NA	NA	NA	unchange	1.35179	0.00018013	3.74441	up	unchange-up
RchiOBHmChr6g0298561	RchiOBHm_Chr6g0298561	Putative lysophospholipase	0.974	0.73556	-0.0380063	0.133382	unchange	1.16715	6.8e-05	4.16749	up	unchange-up
RchiOBHmChr6g0299381	RchiOBHm_Chr6g0299381	Putative cupredoxin	0.893	0.29418	-0.163268	0.531387	unchange	2.86991	2.47e-32	31.6073	up	unchange-up
RchiOBHmChr6g0299431	RchiOBHm_Chr6g0299431	Putative 3-hydroxyisobutyryl-CoA hydrolase	1.247	0.020619	0.318461	1.68573	unchange	1.36143	5.57e-07	6.25414	up	unchange-up
RchiOBHmChr6g0300231	RchiOBHm_Chr6g0300231	transmembrane protein, putative [Medicago truncatula]	NA	NA	NA	NA	unchange	1.41839	5.53e-05	4.25727	up	unchange-up
RchiOBHmChr6g0301551	RchiOBHm_Chr6g0301551	Putative ATPase, AAA-type, core, AAA-type ATPase domain-containing protein	NA	NA	NA	NA	unchange	1.25848	0.00241714	2.6167	up	unchange-up
RchiOBHmChr6g0302571	RchiOBHm_Chr6g0302571	Putative filament-like plant protein	NA	NA	NA	NA	unchange	1.42914	2.81e-09	8.55129	up	unchange-up
RchiOBHmChr6g0302691	RchiOBHm_Chr6g0302691	Putative protein disulfide-isomerase	NA	NA	NA	NA	unchange	1.57163	8.5e-07	6.07058	up	unchange-up
RchiOBHmChr6g0303721	RchiOBHm_Chr6g0303721	Putative Blue (type 1) copper binding protein	NA	NA	NA	NA	unchange	2.35783	7.13e-25	24.1469	up	unchange-up
RchiOBHmChr6g0303811	RchiOBHm_Chr6g0303811	Putative CRAL-TRIO lipid binding domain-containing protein	NA	NA	NA	NA	unchange	4.83341	6.25e-11	10.2041	up	unchange-up
RchiOBHmChr6g0303931	RchiOBHm_Chr6g0303931	Putative laccase	1.121	0.104563	0.164786	0.980622	unchange	1.54018	2.5e-07	6.60206	up	unchange-up
RchiOBHmChr6g0304091	RchiOBHm_Chr6g0304091	Putative AMP-dependent synthetase/ligase, AMP-binding enzyme domain-containing protein	1.069	0.14594	0.0962619	0.835826	unchange	1.05576	1.41e-07	6.85078	up	unchange-up
RchiOBHmChr6g0304311	RchiOBHm_Chr6g0304311	Putative 1,4-alpha-glucan branching enzyme	0.919	0.190275	-0.121863	0.720618	unchange	2.20153	2.36e-08	7.62709	up	unchange-up
RchiOBHmChr6g0305621	RchiOBHm_Chr6g0305621	BZIP protein [Medicago truncatula]	0.424	0.051783	-1.23786	1.28581	unchange	1.05265	0.000392485	3.40618	up	unchange-up
RchiOBHmChr6g0305921	RchiOBHm_Chr6g0305921	Putative alpha/Beta hydrolase	1.043	0.32104	0.0607392	0.493441	unchange	1.59027	0.00011895	3.92464	up	unchange-up
RchiOBHmChr6g0306981	RchiOBHm_Chr6g0306981	Putative cupredoxin	NA	NA	NA	NA	unchange	1.78967	0.00114077	2.9428	up	unchange-up
RchiOBHmChr6g0307051	RchiOBHm_Chr6g0307051	Putative bleomycin hydrolase transcription factor WD40-like family	1.036	0.3977	0.051024	0.400444	unchange	1.05174	2.57e-07	6.59007	up	unchange-up
RchiOBHmChr6g0307411	RchiOBHm_Chr6g0307411	Putative carboxylesterase	0.819	0.174425	-0.288065	0.758391	unchange	1.91338	8.36e-07	6.07779	up	unchange-up
RchiOBHmChr6g0307901	RchiOBHm_Chr6g0307901	Putative transcription factor WD40-like family	NA	NA	NA	NA	unchange	1.44203	3.9e-07	6.40894	up	unchange-up
RchiOBHmChr6g0308111	RchiOBHm_Chr6g0308111	Putative transcription factor WD40-like family	1.705	NA	0.769772	NA	unchange	1.38652	4.2e-07	6.37675	up	unchange-up
RchiOBHmChr6g0308191	RchiOBHm_Chr6g0308191	Putative tripeptidyl-peptidase II	0.959	0.51924	-0.0603973	0.284632	unchange	1.29432	2.36e-05	4.62709	up	unchange-up
RchiOBHmChr6g0308251	RchiOBHm_Chr6g0308251	Putative transcription factor bHLH family	NA	NA	NA	NA	unchange	4.40019	6.44e-19	18.1911	up	unchange-up
RchiOBHmChr6g0309531	RchiOBHm_Chr6g0309531	Putative Porin domain-containing protein	1.112	0.110079	0.153157	0.958296	unchange	1.90013	3.92e-06	5.40671	up	unchange-up
RchiOBHmChr6g0310901	RchiOBHm_Chr6g0310901	Putative glycine dehydrogenase (aminomethyl-transferring)	0.93	0.149456	-0.104697	0.825487	unchange	1.42742	3.95e-07	6.4034	up	unchange-up
RchiOBHmChr6g0310931	RchiOBHm_Chr6g0310931	Putative galactosylxylosylprotein 3-beta-galactosyltransferase	NA	NA	NA	NA	unchange	1.19144	0.000263776	3.57876	up	unchange-up
RchiOBHmChr6g0311401	RchiOBHm_Chr6g0311401	Putative (S)-coclaurine-N-methyltransferase	0.968	0.73582	-0.046921	0.133228	unchange	1.15381	0.000131171	3.88216	up	unchange-up
RchiOBHmChr6g0311441	RchiOBHm_Chr6g0311441	Putative 16S rRNA (cytosine(967)-C(5))-methyltransferase	NA	NA	NA	NA	unchange	1.40068	1.93e-06	5.71444	up	unchange-up
RchiOBHmChr6g0311531	RchiOBHm_Chr6g0311531	Putative omega-amidase	1.042	0.31746	0.0593553	0.498311	unchange	1.0645	9.66e-07	6.01502	up	unchange-up
RchiOBHmChr7g0177771	RchiOBHm_Chr7g0177771	Putative EF-hand domain pair protein	1.123	0.149562	0.167358	0.825179	unchange	1.35449	0.00193803	2.71264	up	unchange-up
RchiOBHmChr7g0178171	RchiOBHm_Chr7g0178171	Putative glucan endo-1,3-beta-D-glucosidase	NA	NA	NA	NA	unchange	3.21658	3.22e-08	7.49214	up	unchange-up
RchiOBHmChr7g0178241	RchiOBHm_Chr7g0178241	Putative fructose-bisphosphate aldolase	0.915	0.106399	-0.128156	0.973062	unchange	1.36374	4.81e-06	5.31785	up	unchange-up
RchiOBHmChr7g0178341	RchiOBHm_Chr7g0178341	Putative Zinc finger, RanBP2-type	NA	NA	NA	NA	unchange	1.8461	3.93e-08	7.40561	up	unchange-up
RchiOBHmChr7g0178551	RchiOBHm_Chr7g0178551	Putative EF-hand domain pair protein	1.118	0.3526	0.16092	0.452718	unchange	1.8452	0.00745514	2.12754	up	unchange-up
RchiOBHmChr7g0178731	RchiOBHm_Chr7g0178731	Putative beta-glucosidase	1.24	0.46442	0.31034	0.333089	unchange	4.11643	5.67e-22	21.2464	up	unchange-up
RchiOBHmChr7g0178741	RchiOBHm_Chr7g0178741	Putative beta-glucosidase	0.795	0.116717	-0.330973	0.932866	unchange	5.8619	3.51e-41	40.4547	up	unchange-up
RchiOBHmChr7g0179611	RchiOBHm_Chr7g0179611	Putative N-hydroxythioamide S-beta-glucosyltransferase	NA	NA	NA	NA	unchange	1.33361	7.3e-07	6.13668	up	unchange-up
RchiOBHmChr7g0179731	RchiOBHm_Chr7g0179731	Putative alpha-N-acetylglucosaminidase	0.658	0.15412	-0.603841	0.812141	unchange	1.02524	0.0384508	1.4151	up	unchange-up
RchiOBHmChr7g0181061	RchiOBHm_Chr7g0181061	Putative glutathione transferase	1.055	0.60724	0.077243	0.21664	unchange	1.47835	1.97e-12	11.7055	up	unchange-up
RchiOBHmChr7g0182721	RchiOBHm_Chr7g0182721	Putative diacylglycerol kinase (ATP)	0.658	NA	-0.603841	NA	unchange	1.90901	0.00306799	2.51315	up	unchange-up
RchiOBHmChr7g0182991	RchiOBHm_Chr7g0182991	Putative X8 domain-containing protein	NA	NA	NA	NA	unchange	2.02591	4.88e-24	23.3116	up	unchange-up
RchiOBHmChr7g0183131	RchiOBHm_Chr7g0183131	Putative nucleotide-binding alpha-beta plait domain-containing protein	1.435	0.136435	0.521051	0.865074	unchange	1.50823	4.56e-07	6.34104	up	unchange-up
RchiOBHmChr7g0183171	RchiOBHm_Chr7g0183171	Putative glycerophosphodiester phosphodiesterase	1.045	0.45384	0.0635029	0.343097	unchange	1.6022	6.67e-16	15.1759	up	unchange-up
RchiOBHmChr7g0184041	RchiOBHm_Chr7g0184041	Putative peptidase S49, protease IV, peptidase S49, SppA, ClpP/crotonase-like protein	0.977	0.77094	-0.0335695	0.112979	unchange	1.25813	1.71e-07	6.767	up	unchange-up
RchiOBHmChr7g0184231	RchiOBHm_Chr7g0184231	Putative Rhodanese-like domain-containing protein	1.059	0.26066	0.0827026	0.583926	unchange	1.55356	0.00583228	2.23416	up	unchange-up
RchiOBHmChr7g0186361	RchiOBHm_Chr7g0186361	Putative alpha,alpha-trehalase	1.27	0.70716	0.344828	0.150482	unchange	2.13521	1.66e-08	7.77989	up	unchange-up
RchiOBHmChr7g0187351	RchiOBHm_Chr7g0187351	Putative cellulase	NA	NA	NA	NA	unchange	3.08091	7.52e-12	11.1238	up	unchange-up
RchiOBHmChr7g0188031	RchiOBHm_Chr7g0188031	Putative cinnamyl-alcohol dehydrogenase	0.977	0.21724	-0.0335695	0.66306	unchange	1.61734	0.000122853	3.91061	up	unchange-up
RchiOBHmChr7g0188511	RchiOBHm_Chr7g0188511	transferring glycosyl group transferase [Arabidopsis thaliana]	NA	NA	NA	NA	unchange	2.01862	3.83e-05	4.4168	up	unchange-up
RchiOBHmChr7g0188771	RchiOBHm_Chr7g0188771	Putative alpha-mannosidase	1.121	0.0070151	0.164786	2.15397	unchange	1.1276	2.03e-08	7.6925	up	unchange-up
RchiOBHmChr7g0188991	RchiOBHm_Chr7g0188991	Putative Acyl carrier protein (ACP)	1.005	0.93858	0.0071955	0.0275287	unchange	3.19463	2.53e-15	14.5969	up	unchange-up
RchiOBHmChr7g0190361	RchiOBHm_Chr7g0190361	Putative ribosomal protein L22/L17	NA	NA	NA	NA	unchange	1.34883	2.37e-10	9.62525	up	unchange-up
RchiOBHmChr7g0190431	RchiOBHm_Chr7g0190431	Putative beta-lactamase transcription factor MYB family	0.96	NA	-0.0588937	NA	unchange	1.15915	9.65e-06	5.01547	up	unchange-up
RchiOBHmChr7g0192491	RchiOBHm_Chr7g0192491	Putative protein-synthesizing GTPase	1.06	0.44842	0.0840643	0.348315	unchange	1.50724	1.91e-14	13.719	up	unchange-up
RchiOBHmChr7g0193221	RchiOBHm_Chr7g0193221	transmembrane protein, putative [Medicago truncatula]	1.173	0.127004	0.230203	0.896183	unchange	2.09096	1.4e-15	14.8539	up	unchange-up
RchiOBHmChr7g0194141	RchiOBHm_Chr7g0194141	uncharacterized LOC103649536 [Zea mays]	NA	NA	NA	NA	unchange	1.87084	5.78e-09	8.23807	up	unchange-up
RchiOBHmChr7g0194681	RchiOBHm_Chr7g0194681	Putative pentatricopeptide	0.671	NA	-0.575615	NA	unchange	1.42871	2.66e-05	4.57512	up	unchange-up
RchiOBHmChr7g0198711	RchiOBHm_Chr7g0198711	Putative thaumatin	NA	NA	NA	NA	unchange	4.90332	1.2e-47	46.9208	up	unchange-up
RchiOBHmChr7g0198721	RchiOBHm_Chr7g0198721	Putative thaumatin	NA	NA	NA	NA	unchange	4.08059	3.25e-05	4.48812	up	unchange-up
RchiOBHmChr7g0202271	RchiOBHm_Chr7g0202271	Putative L-ascorbate oxidase	0.691	0.041856	-0.533242	1.37824	unchange	2.29463	9.29e-18	17.032	up	unchange-up
RchiOBHmChr7g0202461	RchiOBHm_Chr7g0202461	Putative flavin monooxygenase, FAD/NAD(P)-binding domain-containing protein	0.987	0.78532	-0.018878	0.104953	unchange	1.38143	0.00148412	2.82853	up	unchange-up
RchiOBHmChr7g0203711	RchiOBHm_Chr7g0203711	Putative inositol 2-dehydrogenase	1.142	0.199723	0.191563	0.699572	unchange	1.03016	0.00103507	2.98503	up	unchange-up
RchiOBHmChr7g0204691	RchiOBHm_Chr7g0204691	Putative methylglutaconyl-CoA hydratase	1.071	0.199839	0.0989585	0.69932	unchange	1.09786	5.91e-05	4.22841	up	unchange-up
RchiOBHmChr7g0204821	RchiOBHm_Chr7g0204821	Putative rmlC-like jelly roll protein	1.017	0.5828	0.0243197	0.23448	unchange	1.05877	0.00259324	2.58616	up	unchange-up
RchiOBHmChr7g0208101	RchiOBHm_Chr7g0208101	Putative dynamin central domain, dynamin, GTPase domain, GTPase effector domain, Dynamin superfamily	NA	NA	NA	NA	unchange	2.98612	6.75e-08	7.1707	up	unchange-up
RchiOBHmChr7g0208991	RchiOBHm_Chr7g0208991	Putative protein kinase RLK-Pelle-RLCK-XII-1 family	0.829	0.080259	-0.270556	1.09551	unchange	1.37709	2.25e-07	6.64782	up	unchange-up
RchiOBHmChr7g0209071	RchiOBHm_Chr7g0209071	Putative glycine cleavage system H-protein/Simiate	1.381	0.0186647	0.465713	1.72898	unchange	4.49697	5.59e-79	78.2526	up	unchange-up
RchiOBHmChr7g0210321	RchiOBHm_Chr7g0210321	Putative alpha,alpha-trehalose-phosphate synthase (UDP-forming), Trehalose-phosphatase	0.516	0.061937	-0.954557	1.20805	unchange	2.06641	7.93e-12	11.1007	up	unchange-up
RchiOBHmChr7g0211741	RchiOBHm_Chr7g0211741	Putative HSP20-like chaperone, P-loop containing nucleoside triphosphate hydrolase	0.817	0.34884	-0.291592	0.457374	unchange	1.03149	0.00250002	2.60206	up	unchange-up
RchiOBHmChr7g0211891	RchiOBHm_Chr7g0211891	Putative salutaridine reductase (NADPH)	1.318	0.076721	0.39835	1.11509	unchange	1.52204	4.42e-12	11.3546	up	unchange-up
RchiOBHmChr7g0212921	RchiOBHm_Chr7g0212921	Putative cobalamin (vitamin B12) biosynthesis CobW-like protein	NA	NA	NA	NA	unchange	1.43521	0.000143076	3.84443	up	unchange-up
RchiOBHmChr7g0213111	RchiOBHm_Chr7g0213111	Putative hexosyltransferase	1.073	0.22616	0.10165	0.645584	unchange	1.95739	0.0370097	1.43168	up	unchange-up
RchiOBHmChr7g0213141	RchiOBHm_Chr7g0213141	Putative hexosyltransferase	1.131	0.55094	0.177599	0.258896	unchange	1.86596	0.0195517	1.70882	up	unchange-up
RchiOBHmChr7g0215041	RchiOBHm_Chr7g0215041	Putative glutathione transferase	1.117	0.23002	0.159629	0.638234	unchange	2.53437	3.99e-25	24.399	up	unchange-up
RchiOBHmChr7g0216141	RchiOBHm_Chr7g0216141	Putative argininosuccinate lyase	1.05	0.2875	0.0703893	0.541362	unchange	1.08317	1.43e-05	4.84466	up	unchange-up
RchiOBHmChr7g0216231	RchiOBHm_Chr7g0216231	Putative glyceraldehyde-3-phosphate dehydrogenase (NADP(+)) (phosphorylating)	1.293	0.030539	0.370722	1.51515	unchange	3.21303	3.85e-40	39.4145	up	unchange-up
RchiOBHmChr7g0216681	RchiOBHm_Chr7g0216681	Putative PPC domain, AT hook, DNA-binding protein	1.141	NA	0.190299	NA	unchange	1.3322	1.35e-07	6.86967	up	unchange-up
RchiOBHmChr7g0216691	RchiOBHm_Chr7g0216691	Putative photosystem II	1.045	0.81908	0.0635029	0.0866737	unchange	1.38768	0.000599474	3.22223	up	unchange-up
RchiOBHmChr7g0217331	RchiOBHm_Chr7g0217331	Putative protein kinase RLK-Pelle-LRR-XI-1 family	NA	NA	NA	NA	unchange	1.14789	4.03e-07	6.39469	up	unchange-up
RchiOBHmChr7g0218141	RchiOBHm_Chr7g0218141	Putative ferric-chelate reductase (NADH)	0.87	0.52042	-0.200913	0.283646	unchange	1.04667	0.0482498	1.3165	up	unchange-up
RchiOBHmChr7g0219471	RchiOBHm_Chr7g0219471	Putative GMP synthase (glutamine-hydrolyzing)	1.496	0.0047181	0.58111	2.32623	unchange	1.01837	2.21e-06	5.65561	up	unchange-up
RchiOBHmChr7g0219521	RchiOBHm_Chr7g0219521	Putative carboxylesterase	0.652	0.113355	-0.617056	0.945559	unchange	2.04874	0.00801884	2.09589	up	unchange-up
RchiOBHmChr7g0225171	RchiOBHm_Chr7g0225171	Putative fructose-bisphosphatase	1.24	0.40542	0.31034	0.392095	unchange	1.35855	0.000426773	3.3698	up	unchange-up
RchiOBHmChr7g0225361	RchiOBHm_Chr7g0225361	Putative 3''-deamino-3''-oxonicotianamine reductase	2.67	NA	1.41684	NA	unchange	1.3632	0.00138126	2.85973	up	unchange-up
RchiOBHmChr7g0225491	RchiOBHm_Chr7g0225491	Putative dynamin GTPase	0.912	0.6303	-0.132894	0.200453	unchange	1.3722	5.24e-10	9.28067	up	unchange-up
RchiOBHmChr7g0230891	RchiOBHm_Chr7g0230891	Putative glucuronoxylan 4-O-methyltransferase	0.755	0.141825	-0.405451	0.848247	unchange	1.96524	0.000283413	3.54758	up	unchange-up
RchiOBHmChr7g0232471	RchiOBHm_Chr7g0232471	Putative protein kinase RLK-Pelle-LRR-XI-1 family	1.752	0.063984	0.809003	1.19393	unchange	1.78893	1.11e-14	13.9547	up	unchange-up
RchiOBHmChr7g0232591	RchiOBHm_Chr7g0232591	Putative shikimate O-hydroxycinnamoyltransferase	NA	NA	NA	NA	unchange	2.87738	2.41e-06	5.61798	up	unchange-up
RchiOBHmChr7g0236921	RchiOBHm_Chr7g0236921	Putative nepenthesin	0.814	0.30008	-0.296899	0.522763	unchange	2.31975	3.78e-09	8.42251	up	unchange-up
RchiOBHmChr7g0239931	RchiOBHm_Chr7g0239931	Putative ligase	0.813	0.051184	-0.298673	1.29087	unchange	1.02876	3.44e-05	4.46344	up	unchange-up
RchiOBHmChr7g0241451	RchiOBHm_Chr7g0241451	PREDICTED: calvin cycle protein CP12-1, chloroplastic-like [Fragaria vesca subsp. vesca]	1.019	0.9763	0.0271541	0.0104167	unchange	1.05464	0.000214597	3.66838	up	unchange-up
RchiOBHmChr7g0242391	RchiOBHm_Chr7g0242391	Putative L-ascorbate peroxidase	1.114	0.31698	0.155749	0.498968	unchange	2.9968	5.24e-14	13.2807	up	unchange-up
RchiOBHmChr7g0242711	RchiOBHm_Chr7g0242711	Putative protein kinase CAMK-OST1L family	NA	NA	NA	NA	unchange	1.61401	2.43e-05	4.61439	up	unchange-up
RchiOBHmChr7g0243351	RchiOBHm_Chr7g0243351	Putative transcription factor & chromatin remodeling &Metalloenzymes JmjC family	1.067	0.97728	0.0935602	0.00998099	unchange	1.65593	0.045062	1.34619	up	unchange-up
RchiOBHmChr7g0243531	RchiOBHm_Chr7g0243531	Putative phosphate-induced protein	NA	NA	NA	NA	unchange	1.36031	0.00289014	2.53908	up	unchange-up
RchiOBHmChr7g0243541	RchiOBHm_Chr7g0243541	Putative phosphate-induced protein	1.882	0.21508	0.912267	0.6674	unchange	1.25222	0.0291222	1.53578	up	unchange-up

## Sheet: cluster 6
Transcription.ID	Protein.accession	Protein.description	Ratio	P.value	log2FC.x	log10p.x	Regulation.x	log2FC.y	FDR	log10p.y	Regulation.y	type
RchiOBHmChr1g0330141	RchiOBHm_Chr1g0330141	Putative ubiquitinyl hydrolase 1	2.561	0.0041848	1.35671	2.37833	up	-2.48547	0.0147368	1.8316	down	up-down
RchiOBHmChr1g0348141	RchiOBHm_Chr1g0348141	Putative oxidoreductase	4.352	0.0099414	2.12168	2.00255	up	-3.75482	1.64e-28	27.7852	down	up-down
RchiOBHmChr1g0351371	RchiOBHm_Chr1g0351371	Putative carboxylesterase	2.415	9.8322e-05	1.27202	4.00735	up	-2.09283	1.19e-22	21.9245	down	up-down
RchiOBHmChr2g0129071	RchiOBHm_Chr2g0129071	Putative PMR5 domain, PC-Esterase	2.259	0.0051837	1.17568	2.28536	up	-1.64233	4.79e-10	9.31966	down	up-down
RchiOBHmChr2g0156601	RchiOBHm_Chr2g0156601	Putative chlorophyll A-B binding protein	1.78	0.0077153	0.831877	2.11265	up	-1.06033	0.0002416	3.6169	down	up-down
RchiOBHmChr3g0454041	RchiOBHm_Chr3g0454041	Putative cation/H+ exchanger, cation/H+ exchanger, CPA1 family	2.637	0.00158363	1.3989	2.80035	up	-1.48052	1.97e-12	11.7055	down	up-down
RchiOBHmChr3g0455691	RchiOBHm_Chr3g0455691	Putative rubber elongation factor	1.501	0.049002	0.585924	1.30979	up	-1.31988	1.01e-10	9.99568	down	up-down
RchiOBHmChr3g0459271	RchiOBHm_Chr3g0459271	Putative protein kinase RLK-Pelle-LRR-VIII-1 family	3.274	0.0003839	1.71105	3.41578	up	-1.62523	1.05e-15	14.9788	down	up-down
RchiOBHmChr3g0460591	RchiOBHm_Chr3g0460591	Putative plant lipid transfer protein/Par allergen	1.655	0.0077159	0.726831	2.11261	up	-2.21558	3.49e-23	22.4572	down	up-down
RchiOBHmChr3g0465491	RchiOBHm_Chr3g0465491	Putative oxidoreductase	3.717	0.00158016	1.89414	2.8013	up	-1.47581	4.32e-10	9.36452	down	up-down
RchiOBHmChr3g0485561	RchiOBHm_Chr3g0485561	Putative peptidylprolyl isomerase	3.903	2.3592e-05	1.96458	4.62724	up	-2.26842	3.39e-31	30.4698	down	up-down
RchiOBHmChr4g0427421	RchiOBHm_Chr4g0427421	Putative [Pyruvate dehydrogenase (acetyl-transferring)] kinase	1.817	0.0047835	0.861558	2.32025	up	-1.39819	9.39e-13	12.0273	down	up-down
RchiOBHmChr4g0428351	RchiOBHm_Chr4g0428351	Putative xyloglucan:xyloglucosyl transferase, Xyloglucan-specific endo-beta-1,4-glucanase	3.323	6.1281e-05	1.73249	4.21267	up	-1.59878	1.27e-08	7.8962	down	up-down
RchiOBHmChr4g0430671	RchiOBHm_Chr4g0430671	Putative transferase, protein kinase RLK-Pelle-LRR-III family	1.678	0.0048807	0.746743	2.31152	up	-1.56094	4.42e-11	10.3546	down	up-down
RchiOBHmChr5g0008511	RchiOBHm_Chr5g0008511	Putative linoleate 13S-lipoxygenase	2.308	0.0042418	1.20664	2.37245	up	-3.68063	3.95e-39	38.4034	down	up-down
RchiOBHmChr5g0014331	RchiOBHm_Chr5g0014331	Putative 9-cis-epoxycarotenoid dioxygenase	3.762	0.002503	1.9115	2.60154	up	-1.19656	6.3e-08	7.20066	down	up-down
RchiOBHmChr5g0014411	RchiOBHm_Chr5g0014411	Putative (S)-2-hydroxy-acid oxidase	2.044	0.00023551	1.0314	3.62799	up	-1.02568	3.96e-07	6.4023	down	up-down
RchiOBHmChr5g0032401	RchiOBHm_Chr5g0032401	Putative aromatic-amino-acid transaminase	1.514	0.0004403	0.598365	3.35625	up	-1.31682	1.63e-11	10.7878	down	up-down
RchiOBHmChr5g0061851	RchiOBHm_Chr5g0061851	PREDICTED: BTB/POZ domain-containing protein At5g60050 [Fragaria vesca subsp. vesca]	2.498	0.0037381	1.32077	2.42735	up	-1.30901	6.98e-10	9.15614	down	up-down
RchiOBHmChr5g0062131	RchiOBHm_Chr5g0062131	Putative chitinase	2.183	0.00178106	1.12631	2.74932	up	-1.73463	0.00310341	2.50816	down	up-down
RchiOBHmChr5g0077961	RchiOBHm_Chr5g0077961	Putative glycosidase	17.927	1.8058e-05	4.16406	4.74333	up	-1.8144	6.3e-11	10.2007	down	up-down
RchiOBHmChr6g0249641	RchiOBHm_Chr6g0249641	Putative leucine-rich repeat domain, L domain-containing protein	1.518	0.00023628	0.602172	3.62657	up	-1.63809	1.03e-16	15.9872	down	up-down
RchiOBHmChr6g0285301	RchiOBHm_Chr6g0285301	Putative pectate lyase	1.593	0.000104317	0.671746	3.98164	up	-1.96616	4.31e-17	16.3655	down	up-down
RchiOBHmChr6g0289521	RchiOBHm_Chr6g0289521	Putative carboxylic ester hydrolase	3.156	0.0061167	1.6581	2.21348	up	-2.0709	1e-25	25	down	up-down
RchiOBHmChr6g0294021	RchiOBHm_Chr6g0294021	Putative 2-acylglycerol O-acyltransferase	1.901	0.024524	0.926759	1.61041	up	-1.08348	4.41e-08	7.35556	down	up-down
RchiOBHmChr6g0298661	RchiOBHm_Chr6g0298661	Putative Galactose-binding domain-containing protein	1.603	0.0031634	0.680774	2.49985	up	-1.53226	7.02e-07	6.15366	down	up-down
RchiOBHmChr6g0303551	RchiOBHm_Chr6g0303551	Putative expansin/Lol pI	6.471	0.0108359	2.69399	1.96514	up	-6.34058	1e-57	57	down	up-down
RchiOBHmChr6g0311211	RchiOBHm_Chr6g0311211	Putative LOG family protein	1.733	0.0137808	0.793272	1.86073	up	-1.11499	3.45e-08	7.46218	down	up-down
RchiOBHmChr7g0188461	RchiOBHm_Chr7g0188461	Putative stress up-regulated Nod 19	1.523	0.049182	0.606916	1.30819	up	-2.14669	0.0131756	1.88023	down	up-down
RchiOBHmChr7g0194661	RchiOBHm_Chr7g0194661	Putative UDP-glucose 4-epimerase	1.544	0.00066217	0.626673	3.17903	up	-1.15325	3.32e-09	8.47886	down	up-down
RchiOBHmChr7g0197451	RchiOBHm_Chr7g0197451	Putative major intrinsic protein	1.586	0.020744	0.665393	1.68311	up	-1.14464	0.000275822	3.55937	down	up-down
RchiOBHmChr7g0202081	RchiOBHm_Chr7g0202081	Putative pectinesterase	2.024	0.025921	1.01721	1.58635	up	-1.59777	2.14e-14	13.6696	down	up-down
RchiOBHmChr7g0202311	RchiOBHm_Chr7g0202311	Acid beta-fructofuranosidase 2, vacuolar	1.512	0.037639	0.596458	1.42436	up	-3.07682	1.79e-48	47.7471	down	up-down
RchiOBHmChr7g0211861	RchiOBHm_Chr7g0211861	Putative cellulose synthase (UDP-forming)	1.616	0.0034404	0.692427	2.46339	up	-1.50872	8.05e-14	13.0942	down	up-down
RchiOBHmChr7g0213931	RchiOBHm_Chr7g0213931	Putative ubiquinol oxidase (non-electrogenic)	1.563	0.032097	0.644318	1.49354	up	-1.80806	3.36e-17	16.4737	down	up-down

## Sheet: cluster 7
Transcription.ID	Protein.accession	Protein.description	Ratio	P.value	log2FC.x	log10p.x	Regulation.x	log2FC.y	FDR	log10p.y	Regulation.y	type
RchiOBHmChr1g0314871	RchiOBHm_Chr1g0314871	Putative cytochrome P450	3.112	0.00071595	1.63784	3.14512	up	0.0191833	0.971545	0.0125369	unchange	up-unchange
RchiOBHmChr1g0321111	RchiOBHm_Chr1g0321111	Putative tetratricopeptide-like helical domain-containing protein	1.52	0.039304	0.604071	1.40556	up	0.77432	0.0719423	1.14302	unchange	up-unchange
RchiOBHmChr1g0329311	RchiOBHm_Chr1g0329311	Putative oxidoreductase	2.313	0.041384	1.20977	1.38317	up	-0.267563	0.292599	0.533728	unchange	up-unchange
RchiOBHmChr1g0330121	RchiOBHm_Chr1g0330121	Putative ubiquitinyl hydrolase 1	2.328	0.0197437	1.21909	1.70457	up	-0.0332327	0.936557	0.028466	unchange	up-unchange
RchiOBHmChr1g0330551	RchiOBHm_Chr1g0330551	Putative SUN domain-containing protein	1.508	0.0150442	0.592636	1.82263	up	0.000952519	0.99408	0.00257868	unchange	up-unchange
RchiOBHmChr1g0333011	RchiOBHm_Chr1g0333011	Putative protein-serine/threonine kinase CMGC-CDK-Pl family	2.805	0.00142169	1.488	2.8472	up	-0.27771	0.340256	0.468194	unchange	up-unchange
RchiOBHmChr1g0336731	RchiOBHm_Chr1g0336731	Putative transcription factor WD40-like family	2.081	0.0186975	1.05728	1.72822	up	0.64601	0.00720977	2.14208	unchange	up-unchange
RchiOBHmChr1g0354071	RchiOBHm_Chr1g0354071	Putative remorin	2.407	0.028042	1.26724	1.55219	up	1.30847	0.130254	0.885209	unchange	up-unchange
RchiOBHmChr1g0358211	RchiOBHm_Chr1g0358211	Putative chitinase	2.121	0.0044212	1.08474	2.35446	up	-0.612259	0.472745	0.325373	unchange	up-unchange
RchiOBHmChr1g0358401	RchiOBHm_Chr1g0358401	Putative chitinase	1.575	0.027081	0.655352	1.56734	up	-0.483049	0.034993	1.45602	unchange	up-unchange
RchiOBHmChr1g0360711	RchiOBHm_Chr1g0360711	Putative cytochrome b5-like heme/steroid binding domain-containing protein	1.691	0.029641	0.757877	1.52811	up	-0.953228	2.45e-06	5.61083	unchange	up-unchange
RchiOBHmChr1g0361061	RchiOBHm_Chr1g0361061	Putative NDP-glucose--starch glucosyltransferase	1.844	0.0077967	0.882839	2.10809	up	-0.682211	0.00534685	2.2719	unchange	up-unchange
RchiOBHmChr1g0361351	RchiOBHm_Chr1g0361351	Putative inorganic diphosphatase	1.677	0.0168009	0.745883	1.77467	up	-0.717917	0.0640183	1.1937	unchange	up-unchange
RchiOBHmChr1g0368001	RchiOBHm_Chr1g0368001	Putative nepenthesin	3.905	0.0096763	1.96532	2.01429	up	-3.11893	0.0530635	1.2752	unchange	up-unchange
RchiOBHmChr1g0371291	RchiOBHm_Chr1g0371291	neuronal PAS domain protein [Arabidopsis thaliana]	2.049	0.00195601	1.03492	2.70863	up	-0.731935	0.000317379	3.49842	unchange	up-unchange
RchiOBHmChr1g0372631	RchiOBHm_Chr1g0372631	Putative carboxylesterase	1.882	0.00028351	0.912267	3.54743	up	-0.769574	0.000227697	3.64264	unchange	up-unchange
RchiOBHmChr1g0374671	RchiOBHm_Chr1g0374671	Putative pectinesterase	2.414	0.030843	1.27143	1.51084	up	-0.284792	0.641887	0.192542	unchange	up-unchange
RchiOBHmChr1g0374921	RchiOBHm_Chr1g0374921	Putative phosphate-induced protein	1.509	0.0044634	0.593593	2.35033	up	0.190467	0.424868	0.371746	unchange	up-unchange
RchiOBHmChr1g0379721	RchiOBHm_Chr1g0379721	Putative glycosidase	5.141	0.041603	2.36205	1.38088	up	-0.340174	0.499229	0.3017	unchange	up-unchange
RchiOBHmChr1g0384031	RchiOBHm_Chr1g0384031	Putative laccase	4.128	0.0166619	2.04544	1.77828	up	-0.272566	0.563786	0.248885	unchange	up-unchange
RchiOBHmChr2g0085181	RchiOBHm_Chr2g0085181	Putative carboxypeptidase D	1.614	0.02172	0.690641	1.66314	up	0.00585125	0.982007	0.00788534	unchange	up-unchange
RchiOBHmChr2g0086411	RchiOBHm_Chr2g0086411	Putative DNA helicase	2.091	0.00094414	1.06419	3.02496	up	0.775354	0.00172741	2.76261	unchange	up-unchange
RchiOBHmChr2g0089261	RchiOBHm_Chr2g0089261	Putative methyltransferase	1.775	0.0031648	0.827819	2.49965	up	0.578573	0.0131982	1.87949	unchange	up-unchange
RchiOBHmChr2g0091051	RchiOBHm_Chr2g0091051	Putative non-heme dioxygenase domain, isopenicillin N synthase	2.027	6.4184e-05	1.01935	4.19257	up	-0.596796	0.0128292	1.8918	unchange	up-unchange
RchiOBHmChr2g0091421	RchiOBHm_Chr2g0091421	Putative major facilitator, sugar transporter, major facilitator superfamily	1.806	0.047224	0.852798	1.32584	up	-0.952517	9.31e-06	5.03105	unchange	up-unchange
RchiOBHmChr2g0091641	RchiOBHm_Chr2g0091641	Putative polyketide cyclase/dehydrase, START-like domain-containing protein	3.469	0.025185	1.79452	1.59886	up	NA	NA	NA	unchange	up-unchange
RchiOBHmChr2g0093511	RchiOBHm_Chr2g0093511	Putative feruloyl esterase	2.736	0.00035505	1.45207	3.44971	up	-0.780658	0.00485782	2.31356	unchange	up-unchange
RchiOBHmChr2g0094751	RchiOBHm_Chr2g0094751	Putative germin, rmlC-like cupin domain-containing protein	3.516	0.0053377	1.81394	2.27265	up	NA	NA	NA	unchange	up-unchange
RchiOBHmChr2g0095431	RchiOBHm_Chr2g0095431	Putative LSM domain-containing protein	1.973	0.00864	0.980391	2.06349	up	-0.0404452	0.925544	0.0336029	unchange	up-unchange
RchiOBHmChr2g0099341	RchiOBHm_Chr2g0099341	Vacuolar protein 8 [Morus notabilis]	1.839	0.0036036	0.878921	2.44326	up	-0.377195	0.103108	0.986706	unchange	up-unchange
RchiOBHmChr2g0100891	RchiOBHm_Chr2g0100891	Putative theobromine synthase	1.856	0.0100047	0.892197	1.9998	up	-0.398993	0.0788999	1.10292	unchange	up-unchange
RchiOBHmChr2g0101431	RchiOBHm_Chr2g0101431	Putative Nrap protein	1.806	0.00041827	0.852798	3.37854	up	0.506506	0.0479783	1.31896	unchange	up-unchange
RchiOBHmChr2g0106691	RchiOBHm_Chr2g0106691	Putative cinnamyl-alcohol dehydrogenase	20.352	7.794e-07	4.3471	6.10824	up	0.61964	0.263712	0.578869	unchange	up-unchange
RchiOBHmChr2g0107161	RchiOBHm_Chr2g0107161	Putative NRAMP family protein	1.594	0.00101765	0.672652	2.9924	up	0.44577	0.0378436	1.42201	unchange	up-unchange
RchiOBHmChr2g0107281	RchiOBHm_Chr2g0107281	Putative alpha/Beta hydrolase, strigolactone esterase D14 family	2.266	0.037577	1.18015	1.42508	up	-0.355299	0.172712	0.762678	unchange	up-unchange
RchiOBHmChr2g0109241	RchiOBHm_Chr2g0109241	Putative xyloglucan:xyloglucosyl transferase, Xyloglucan-specific endo-beta-1,4-glucanase	5.615	0.0020959	2.48929	2.67863	up	0.042641	0.932435	0.0303814	unchange	up-unchange
RchiOBHmChr2g0111661	RchiOBHm_Chr2g0111661	Putative mitochondrial brown fat uncoupling protein	4.177	0.0038006	2.06247	2.42015	up	-0.801246	0.00136069	2.86624	unchange	up-unchange
RchiOBHmChr2g0112461	RchiOBHm_Chr2g0112461	Putative protein kinase CAMK-OST1L family	2.328	0.0017826	1.21909	2.74895	up	-0.996758	1.03e-06	5.98716	unchange	up-unchange
RchiOBHmChr2g0115211	RchiOBHm_Chr2g0115211	Putative glucan 1,3-beta-glucosidase	1.733	0.00045725	0.793272	3.33985	up	0.102961	0.728762	0.137414	unchange	up-unchange
RchiOBHmChr2g0119391	RchiOBHm_Chr2g0119391	Putative oxidoreductase	5.061	0.00234	2.33942	2.63078	up	-0.346376	0.315468	0.501045	unchange	up-unchange
RchiOBHmChr2g0124891	RchiOBHm_Chr2g0124891	Putative chromatin remodeling & transcription regulator ABTB family	2.235	0.0049647	1.16027	2.30411	up	-0.144172	0.590638	0.228679	unchange	up-unchange
RchiOBHmChr2g0127471	RchiOBHm_Chr2g0127471	Putative aromatic-amino-acid transaminase	1.76	0.030299	0.815575	1.51857	up	0.201038	0.556619	0.254442	unchange	up-unchange
RchiOBHmChr2g0133081	RchiOBHm_Chr2g0133081	Putative cinnamoyl-CoA reductase	1.941	0.0067233	0.9568	2.17242	up	0.268951	0.279625	0.553425	unchange	up-unchange
RchiOBHmChr2g0141171	RchiOBHm_Chr2g0141171	Putative triacylglycerol lipase	1.6	0.00128229	0.678072	2.89201	up	0.542183	0.0189817	1.72166	unchange	up-unchange
RchiOBHmChr2g0145781	RchiOBHm_Chr2g0145781	Putative exportin-1/Importin-beta	1.505	0.0028961	0.589763	2.53819	up	-0.267916	0.398138	0.399966	unchange	up-unchange
RchiOBHmChr2g0149111	RchiOBHm_Chr2g0149111	Putative germin, rmlC-like jelly roll	5.522	0.00145565	2.46519	2.83694	up	0.828432	4.66e-05	4.33161	unchange	up-unchange
RchiOBHmChr2g0149871	RchiOBHm_Chr2g0149871	Putative glucan endo-1,3-beta-D-glucosidase	6.398	0.00193981	2.67762	2.71224	up	-2.32115	0.562848	0.249609	unchange	up-unchange
RchiOBHmChr2g0158351	RchiOBHm_Chr2g0158351	Putative nitrate-transporting ATPase	1.613	0.0053213	0.689746	2.27398	up	-0.470732	0.0313465	1.50381	unchange	up-unchange
RchiOBHmChr2g0158811	RchiOBHm_Chr2g0158811	Putative phytepsin	1.536	0.038057	0.619178	1.41957	up	0.743081	0.000273942	3.56234	unchange	up-unchange
RchiOBHmChr2g0159131	RchiOBHm_Chr2g0159131	Putative oxidoreductase	1.579	0.0049039	0.659011	2.30946	up	-0.0634983	0.83786	0.0768285	unchange	up-unchange
RchiOBHmChr2g0161681	RchiOBHm_Chr2g0161681	Putative oligopeptide transporter, OPT superfamily	3.09	0.0032619	1.62761	2.48653	up	0.0344422	0.90663	0.04257	unchange	up-unchange
RchiOBHmChr2g0165901	RchiOBHm_Chr2g0165901	Putative transcription factor WD40-like family	1.914	0.00113561	0.936591	2.94477	up	0.827846	0.000553227	3.2571	unchange	up-unchange
RchiOBHmChr2g0170291	RchiOBHm_Chr2g0170291	Putative FMN-binding split barrel, cellular repressor of E1A-stimulated genes (CREG)	1.71	0.0020588	0.773996	2.68639	up	-0.843086	0.000213721	3.67015	unchange	up-unchange
RchiOBHmChr2g0172171	RchiOBHm_Chr2g0172171	Putative carbonic anhydrase	1.776	0.0021202	0.828632	2.67362	up	-0.115687	0.835955	0.077817	unchange	up-unchange
RchiOBHmChr2g0175251	RchiOBHm_Chr2g0175251	Putative triacylglycerol lipase	3.292	0.042805	1.71896	1.36851	up	-0.940721	0.000859345	3.06583	unchange	up-unchange
RchiOBHmChr3g0447661	RchiOBHm_Chr3g0447661	Putative glutamine--fructose-6-phosphate transaminase (isomerizing)	1.665	0.031125	0.735522	1.50689	up	0.077022	0.816572	0.0880053	unchange	up-unchange
RchiOBHmChr3g0449941	RchiOBHm_Chr3g0449941	Putative protein-serine/threonine phosphatase	1.535	0.0074167	0.618239	2.12979	up	0.153109	0.602918	0.219742	unchange	up-unchange
RchiOBHmChr3g0462271	RchiOBHm_Chr3g0462271	Putative importin subunit beta-1	1.846	0.000124701	0.884403	3.90413	up	0.428721	0.0648526	1.18807	unchange	up-unchange
RchiOBHmChr3g0463101	RchiOBHm_Chr3g0463101	Putative pyridoxal 5'-phosphate synthase (glutamine hydrolyzing)	1.674	0.0112987	0.7433	1.94697	up	NA	NA	NA	unchange	up-unchange
RchiOBHmChr3g0463251	RchiOBHm_Chr3g0463251	Putative signal peptidase I	1.673	0.029637	0.742437	1.52817	up	0.800225	0.0835424	1.07809	unchange	up-unchange
RchiOBHmChr3g0470591	RchiOBHm_Chr3g0470591	Putative major facilitator superfamily	7.437	0.048302	2.89472	1.31603	up	-0.654605	0.00144817	2.83918	unchange	up-unchange
RchiOBHmChr3g0470941	RchiOBHm_Chr3g0470941	Putative expansin/Lol pI	13.153	0.00183595	3.71732	2.73614	up	0.641235	0.176656	0.752872	unchange	up-unchange
RchiOBHmChr3g0473811	RchiOBHm_Chr3g0473811	Putative SOUL heme-binding protein	1.531	0.0160012	0.614474	1.79585	up	0.121632	0.813317	0.0897403	unchange	up-unchange
RchiOBHmChr3g0475681	RchiOBHm_Chr3g0475681	Putative Late embryogenesis abundant protein, LEA-14	1.978	0.0128185	0.984042	1.89216	up	-0.34733	0.203063	0.69237	unchange	up-unchange
RchiOBHmChr3g0479691	RchiOBHm_Chr3g0479691	Putative DNA-directed DNA polymerase	2.053	0.024603	1.03773	1.60901	up	0.338171	0.257544	0.589148	unchange	up-unchange
RchiOBHmChr3g0481621	RchiOBHm_Chr3g0481621	Putative galactinol--sucrose galactosyltransferase, Alpha-galactosidase	2.261	0.0053831	1.17696	2.26897	up	-0.35781	0.268964	0.570305	unchange	up-unchange
RchiOBHmChr3g0484181	RchiOBHm_Chr3g0484181	Putative glucan endo-1,3-beta-D-glucosidase	8.932	0.0023204	3.15898	2.63444	up	-0.179667	0.54312	0.265104	unchange	up-unchange
RchiOBHmChr3g0490221	RchiOBHm_Chr3g0490221	Putative glutamate decarboxylase	2.028	0.0052814	1.02006	2.27725	up	-0.828497	0.000179569	3.74577	unchange	up-unchange
RchiOBHmChr4g0391871	RchiOBHm_Chr4g0391871	Putative Actin family	1.53	0.043075	0.613532	1.36577	up	0.168677	0.568427	0.245325	unchange	up-unchange
RchiOBHmChr4g0392351	RchiOBHm_Chr4g0392351	Putative deacetoxyvindoline 4-hydroxylase	1.596	0.010681	0.674461	1.97139	up	-0.113405	0.927421	0.032723	unchange	up-unchange
RchiOBHmChr4g0396351	RchiOBHm_Chr4g0396351	Putative glutathione transferase	1.902	0.005023	0.927517	2.29904	up	-0.11713	0.76491	0.116389	unchange	up-unchange
RchiOBHmChr4g0397091	RchiOBHm_Chr4g0397091	Putative ubiquinol oxidase (non-electrogenic)	1.79	0.00116457	0.83996	2.93383	up	0.149911	0.734003	0.134302	unchange	up-unchange
RchiOBHmChr4g0397311	RchiOBHm_Chr4g0397311	Putative transcription factor WD40-like family	1.991	9.6875e-05	0.993493	4.01379	up	0.839588	0.000553964	3.25652	unchange	up-unchange
RchiOBHmChr4g0400821	RchiOBHm_Chr4g0400821	Putative peroxidase	2.401	0.0058562	1.26364	2.23238	up	-0.00170763	0.998104	0.000824354	unchange	up-unchange
RchiOBHmChr4g0402511	RchiOBHm_Chr4g0402511	Putative nepenthesin	1.647	0.0084404	0.719841	2.07364	up	-0.091356	0.738639	0.131568	unchange	up-unchange
RchiOBHmChr4g0404991	RchiOBHm_Chr4g0404991	Putative aldehyde oxygenase (deformylating)	2.286	0.0023808	1.19283	2.62328	up	0.255933	0.524408	0.280331	unchange	up-unchange
RchiOBHmChr4g0408481	RchiOBHm_Chr4g0408481	Putative oxidoreductase	2.057	0.0045571	1.04054	2.34131	up	NA	NA	NA	unchange	up-unchange
RchiOBHmChr4g0416751	RchiOBHm_Chr4g0416751	Putative long-chain-fatty-acid--CoA ligase	1.729	0.00028335	0.789938	3.54768	up	-0.639311	0.00312054	2.50577	unchange	up-unchange
RchiOBHmChr4g0418601	RchiOBHm_Chr4g0418601	Putative alpha/Beta hydrolase	2.164	0.00086388	1.1137	3.06355	up	0.620897	0.124844	0.903634	unchange	up-unchange
RchiOBHmChr4g0420971	RchiOBHm_Chr4g0420971	Putative beta-amylase	5.994	0.000121603	2.58352	3.91506	up	-0.662223	0.00296075	2.5286	unchange	up-unchange
RchiOBHmChr4g0423641	RchiOBHm_Chr4g0423641	Putative START-like domain, Bet v I type allergen	8.477	0.00195859	3.08355	2.70806	up	NA	NA	NA	unchange	up-unchange
RchiOBHmChr4g0423961	RchiOBHm_Chr4g0423961	Putative START-like domain, Bet v I type allergen	16.877	0.045622	4.07699	1.34083	up	-0.102286	0.863849	0.063562	unchange	up-unchange
RchiOBHmChr4g0425671	RchiOBHm_Chr4g0425671	Putative serine/threonine-protein phosphatase with EF-hands	6.426	0.0031247	2.68392	2.50519	up	0.303329	0.552125	0.257962	unchange	up-unchange
RchiOBHmChr4g0430241	RchiOBHm_Chr4g0430241	Putative chlorophyll A-B binding protein	1.564	0.0062998	0.645241	2.20067	up	0.329574	0.236387	0.626376	unchange	up-unchange
RchiOBHmChr4g0430761	RchiOBHm_Chr4g0430761	Putative geraniol 8-hydroxylase	7.063	0.0067779	2.82028	2.1689	up	0.177087	0.563248	0.249301	unchange	up-unchange
RchiOBHmChr4g0431091	RchiOBHm_Chr4g0431091	Putative tetrahydroberberine oxidase	2.706	0.022839	1.43616	1.64132	up	1.3333	0.0942619	1.02566	unchange	up-unchange
RchiOBHmChr4g0432641	RchiOBHm_Chr4g0432641	Putative cellulase	2.255	0.00134197	1.17313	2.87226	up	0.369698	0.176363	0.753592	unchange	up-unchange
RchiOBHmChr4g0432941	RchiOBHm_Chr4g0432941	Putative peptide-transporting ATPase	2	0.042059	1	1.37614	up	0.509233	0.0475659	1.3227	unchange	up-unchange
RchiOBHmChr4g0438121	RchiOBHm_Chr4g0438121	Putative ATPase, AAA-type, core, P-loop containing nucleoside triphosphate hydrolase	1.564	0.02146	0.645241	1.66837	up	0.478163	0.144935	0.838828	unchange	up-unchange
RchiOBHmChr4g0438301	RchiOBHm_Chr4g0438301	Putative phosphodiesterase I	1.576	0.047859	0.656268	1.32004	up	0.864218	0.00322853	2.491	unchange	up-unchange
RchiOBHmChr4g0439541	RchiOBHm_Chr4g0439541	Putative expansin/Lol pI	2.007	0.021296	1.00504	1.6717	up	-0.342593	0.512763	0.290083	unchange	up-unchange
RchiOBHmChr4g0442771	RchiOBHm_Chr4g0442771	Putative CRAL-TRIO lipid binding domain, CRAL/TRIO domain-containing protein	2.731	0.0027761	1.44943	2.55656	up	0.000429046	0.980524	0.00854157	unchange	up-unchange
RchiOBHmChr4g0443501	RchiOBHm_Chr4g0443501	Putative pectinesterase	4.525	0.00028306	2.17792	3.54812	up	-0.685611	0.00890156	2.05053	unchange	up-unchange
RchiOBHmChr4g0444051	RchiOBHm_Chr4g0444051	Putative oxidoreductase	32.708	0.000124509	5.03157	3.9048	up	-0.606701	0.0957803	1.01872	unchange	up-unchange
RchiOBHmChr4g0444591	RchiOBHm_Chr4g0444591	Putative N-hydroxythioamide S-beta-glucosyltransferase	2.037	0.042979	1.02645	1.36674	up	-1.85721	0.222462	0.652743	unchange	up-unchange
RchiOBHmChr5g0001711	RchiOBHm_Chr5g0001711	PREDICTED: uncharacterized membrane protein At1g16860 [Fragaria vesca subsp. vesca]	2.044	0.022876	1.0314	1.64062	up	-0.0872104	0.746385	0.127037	unchange	up-unchange
RchiOBHmChr5g0002761	RchiOBHm_Chr5g0002761	Putative adenylyl-sulfate reductase (thioredoxin)	1.911	0.00109797	0.934328	2.95941	up	-0.273637	0.865639	0.0626633	unchange	up-unchange
RchiOBHmChr5g0004231	RchiOBHm_Chr5g0004231	Putative protein kinase RLK-Pelle-DLSV family	2.857	4.3431e-05	1.5145	4.3622	up	0.553194	0.0115645	1.93687	unchange	up-unchange
RchiOBHmChr5g0008121	RchiOBHm_Chr5g0008121	Putative transcription factor TFIIH subunit p52/Tfb2	2.91	0.0129956	1.54102	1.8862	up	0.107798	0.766006	0.115768	unchange	up-unchange
RchiOBHmChr5g0010331	RchiOBHm_Chr5g0010331	Putative PMR5 domain, PC-Esterase, protein trichome birefringence-like 37/38	1.655	0.0090773	0.726831	2.04204	up	-0.207119	0.610845	0.214069	unchange	up-unchange
RchiOBHmChr5g0010931	RchiOBHm_Chr5g0010931	Putative actinidain	5.06	0.000104439	2.33914	3.98114	up	-0.413064	0.062033	1.20738	unchange	up-unchange
RchiOBHmChr5g0014281	RchiOBHm_Chr5g0014281	PREDICTED: outer envelope membrane protein 7 [Vitis vinifera]	2.114	0.00041868	1.07998	3.37812	up	-0.641482	0.0135398	1.86839	unchange	up-unchange
RchiOBHmChr5g0017701	RchiOBHm_Chr5g0017701	Putative tetrahydroberberine oxidase	2.899	0.0129649	1.53556	1.88723	up	0.60081	0.0101583	1.99318	unchange	up-unchange
RchiOBHmChr5g0017721	RchiOBHm_Chr5g0017721	Putative tetrahydroberberine oxidase	1.955	0.031779	0.967169	1.49786	up	0.0260024	0.95529	0.0198648	unchange	up-unchange
RchiOBHmChr5g0019871	RchiOBHm_Chr5g0019871	Putative RNA 3'-terminal-phosphate cyclase (ATP)	3.222	0.0084384	1.68796	2.07374	up	0.278215	0.43614	0.360374	unchange	up-unchange
RchiOBHmChr5g0028041	RchiOBHm_Chr5g0028041	Putative SOUL heme-binding protein	2.713	0.00041755	1.43989	3.37929	up	-0.109659	0.769818	0.113612	unchange	up-unchange
RchiOBHmChr5g0029771	RchiOBHm_Chr5g0029771	Putative protein kinase RLK-Pelle-DLSV family	1.549	0.0119751	0.631337	1.92172	up	NA	NA	NA	unchange	up-unchange
RchiOBHmChr5g0029981	RchiOBHm_Chr5g0029981	Putative protein kinase RLK-Pelle-DLSV family	3.484	0.0051752	1.80074	2.28607	up	0.488899	0.026829	1.57139	unchange	up-unchange
RchiOBHmChr5g0031031	RchiOBHm_Chr5g0031031	Putative bulb-type lectin domain, PAN/Apple domain-containing protein	2.942	0.0075404	1.5568	2.12261	up	-0.508749	0.256431	0.591029	unchange	up-unchange
RchiOBHmChr5g0031081	RchiOBHm_Chr5g0031081	Putative bulb-type lectin domain-containing protein	2.46	0.0154383	1.29866	1.8114	up	NA	NA	NA	unchange	up-unchange
RchiOBHmChr5g0033121	RchiOBHm_Chr5g0033121	Putative triacylglycerol lipase	1.6	0.00142121	0.678072	2.84734	up	0.773084	0.0102202	1.99054	unchange	up-unchange
RchiOBHmChr5g0033461	RchiOBHm_Chr5g0033461	Putative protein kinase RLK-Pelle-DLSV family	12.277	0.00134284	3.61789	2.87198	up	-0.76751	0.000133448	3.87469	unchange	up-unchange
RchiOBHmChr5g0034661	RchiOBHm_Chr5g0034661	Putative peroxidase	1.661	0.0086424	0.732052	2.06337	up	0.285339	0.545362	0.263315	unchange	up-unchange
RchiOBHmChr5g0036051	RchiOBHm_Chr5g0036051	Putative chlorophyll A-B binding protein	2.256	0.028483	1.17377	1.54541	up	0.841665	0.274572	0.561344	unchange	up-unchange
RchiOBHmChr5g0041231	RchiOBHm_Chr5g0041231	Putative beta-glucosidase	1.874	0.00161556	0.906121	2.79168	up	0.544326	0.0147656	1.83075	unchange	up-unchange
RchiOBHmChr5g0053501	RchiOBHm_Chr5g0053501	Putative hydrolase	1.554	0.012003	0.635987	1.92071	up	-0.631979	0.00385805	2.41363	unchange	up-unchange
RchiOBHmChr5g0055091	RchiOBHm_Chr5g0055091	Putative xenobiotic-transporting ATPase	1.554	0.00079673	0.635987	3.09869	up	-0.147432	0.605386	0.217968	unchange	up-unchange
RchiOBHmChr5g0055121	RchiOBHm_Chr5g0055121	Putative iron-chelate-transporting ATPase	7.197	0.0025227	2.8474	2.59813	up	-0.198194	0.626244	0.203256	unchange	up-unchange
RchiOBHmChr5g0056171	RchiOBHm_Chr5g0056171	Putative glycerophosphodiester phosphodiesterase	2.364	0.0045192	1.24123	2.34494	up	0.520205	0.0141312	1.84982	unchange	up-unchange
RchiOBHmChr5g0057621	RchiOBHm_Chr5g0057621	Putative AMP-dependent synthetase/ligase, AMP-binding enzyme domain-containing protein	2.185	0.00066368	1.12763	3.17804	up	-0.135089	0.94502	0.0245592	unchange	up-unchange
RchiOBHmChr5g0059081	RchiOBHm_Chr5g0059081	zinc finger, C3HC4 type family protein, putative [Medicago truncatula]	3.512	0.0083411	1.81229	2.07878	up	-0.194534	0.552783	0.257445	unchange	up-unchange
RchiOBHmChr5g0059511	RchiOBHm_Chr5g0059511	Putative lyase	4.82	6.2359e-05	2.26903	4.2051	up	-0.850724	2.91e-05	4.53611	unchange	up-unchange
RchiOBHmChr5g0060531	RchiOBHm_Chr5g0060531	Putative rmlC-like jelly roll protein	5.707	0.046424	2.51273	1.33326	up	NA	NA	NA	unchange	up-unchange
RchiOBHmChr5g0060591	RchiOBHm_Chr5g0060591	Putative rmlC-like jelly roll protein	5.67	0.0197785	2.50335	1.70381	up	NA	NA	NA	unchange	up-unchange
RchiOBHmChr5g0066091	RchiOBHm_Chr5g0066091	Putative armadillo-like helical, nucleic acid binding NABP, pumilio, RNA binding protein	2.146	0.037358	1.10165	1.42762	up	-0.0933966	0.738858	0.131439	unchange	up-unchange
RchiOBHmChr5g0066721	RchiOBHm_Chr5g0066721	Putative transferase	2.529	0.000184099	1.33857	3.73495	up	-0.5071	0.298715	0.524743	unchange	up-unchange
RchiOBHmChr5g0073811	RchiOBHm_Chr5g0073811	Putative STAR protein, homodimerization region	2.322	0.011856	1.21537	1.92606	up	-0.383944	0.11042	0.956954	unchange	up-unchange
RchiOBHmChr5g0084141	RchiOBHm_Chr5g0084141	Putative L-ascorbate oxidase	10.121	0.00110385	3.33928	2.95709	up	0.536391	0.374994	0.425976	unchange	up-unchange
RchiOBHmChr6g0249341	RchiOBHm_Chr6g0249341	Putative fructokinase	9.77	0.00073749	3.28836	3.13224	up	NA	NA	NA	unchange	up-unchange
RchiOBHmChr6g0252261	RchiOBHm_Chr6g0252261	Putative senescence/spartin-associated	1.656	0.000116154	0.727703	3.93497	up	1.42633	0.0505977	1.29587	unchange	up-unchange
RchiOBHmChr6g0252801	RchiOBHm_Chr6g0252801	Putative small GTPase superfamily, ARF/SAR type, P-loop containing nucleoside triphosphate hydrolase	1.683	0.000196105	0.751035	3.70751	up	-0.901748	7.81e-05	4.10735	unchange	up-unchange
RchiOBHmChr6g0254831	RchiOBHm_Chr6g0254831	plant basic secretory family protein [Populus trichocarpa]	6.134	0.00171766	2.61683	2.76506	up	0.576019	0.187039	0.728067	unchange	up-unchange
RchiOBHmChr6g0254951	RchiOBHm_Chr6g0254951	Cinnamate beta-D-glucosyltransferase	2.049	0.0034184	1.03492	2.46618	up	NA	NA	NA	unchange	up-unchange
RchiOBHmChr6g0255071	RchiOBHm_Chr6g0255071	Putative cinnamyl-alcohol dehydrogenase	2.476	0.00046127	1.30801	3.33604	up	-0.913136	8.19e-06	5.08672	unchange	up-unchange
RchiOBHmChr6g0257431	RchiOBHm_Chr6g0257431	Putative ferredoxin--nitrite reductase	2.229	0.00105793	1.1564	2.97554	up	0.982757	1.86e-05	4.73049	unchange	up-unchange
RchiOBHmChr6g0265391	RchiOBHm_Chr6g0265391	Putative salicylate carboxymethyltransferase	1.88	0.032256	0.910733	1.49139	up	-0.851173	3.94e-05	4.4045	unchange	up-unchange
RchiOBHmChr6g0274101	RchiOBHm_Chr6g0274101	Putative NADP-retinol dehydrogenase	1.507	0.00074292	0.591679	3.12906	up	-0.017722	0.974464	0.0112344	unchange	up-unchange
RchiOBHmChr6g0275361	RchiOBHm_Chr6g0275361	PREDICTED: UPF0496 protein 4 [Fragaria vesca subsp. vesca]	2.221	0.011639	1.15121	1.93408	up	NA	NA	NA	unchange	up-unchange
RchiOBHmChr6g0277361	RchiOBHm_Chr6g0277361	Putative photosystem II	2.531	0.033783	1.33971	1.4713	up	0.720657	0.132682	0.877188	unchange	up-unchange
RchiOBHmChr6g0281701	RchiOBHm_Chr6g0281701	Putative protein kinase AGC-RSK-2 family	1.839	0.00048338	0.878921	3.31571	up	0.228856	0.321061	0.493412	unchange	up-unchange
RchiOBHmChr6g0283721	RchiOBHm_Chr6g0283721	Putative NADPH:quinone reductase	2.8	0.039563	1.48543	1.40271	up	0.7241	0.143389	0.843485	unchange	up-unchange
RchiOBHmChr6g0284551	RchiOBHm_Chr6g0284551	Putative phosphoric monoester hydrolase	1.561	0.0032004	0.642471	2.4948	up	-0.33857	0.144301	0.84073	unchange	up-unchange
RchiOBHmChr6g0287691	RchiOBHm_Chr6g0287691	Putative peptide-transporting ATPase	1.524	5.7903e-05	0.607863	4.2373	up	-0.539336	0.046655	1.3311	unchange	up-unchange
RchiOBHmChr6g0288381	RchiOBHm_Chr6g0288381	Putative acetyltransferase A, auxiliary subunit	1.812	0.0116026	0.857583	1.93544	up	0.989999	0.000291465	3.53541	unchange	up-unchange
RchiOBHmChr6g0296191	RchiOBHm_Chr6g0296191	Putative aldehyde dehydrogenase (NAD(+))	1.528	0.00028012	0.611645	3.55266	up	0.14285	0.627768	0.202201	unchange	up-unchange
RchiOBHmChr6g0297241	RchiOBHm_Chr6g0297241	Putative neurochondrin	1.559	0.00161835	0.640621	2.79093	up	-0.00722372	0.965024	0.0154619	unchange	up-unchange
RchiOBHmChr6g0298911	RchiOBHm_Chr6g0298911	Putative xenobiotic-transporting ATPase	2.219	0.023942	1.14991	1.62084	up	-0.368557	0.10734	0.969239	unchange	up-unchange
RchiOBHmChr6g0299111	RchiOBHm_Chr6g0299111	Putative nepenthesin	2.978	3.9093e-05	1.57434	4.4079	up	0.0897164	0.842954	0.0741959	unchange	up-unchange
RchiOBHmChr6g0302031	RchiOBHm_Chr6g0302031	Putative cathepsin L	1.527	0.00063535	0.6107	3.19699	up	-0.296679	0.227917	0.642224	unchange	up-unchange
RchiOBHmChr6g0303501	RchiOBHm_Chr6g0303501	Putative cinnamyl-alcohol dehydrogenase	3.418	0.00174491	1.77315	2.75823	up	0.0484202	0.898693	0.0463887	unchange	up-unchange
RchiOBHmChr6g0303681	RchiOBHm_Chr6g0303681	Putative monodehydroascorbate reductase (NADH)	4.034	0.000144431	2.01221	3.84034	up	0.510383	0.0591087	1.22835	unchange	up-unchange
RchiOBHmChr6g0306311	RchiOBHm_Chr6g0306311	Putative regulator of chromosome condensation 1/beta-lactamase-inhibitor protein II	2.313	0.0067184	1.20977	2.17273	up	1.27195	0.221091	0.65543	unchange	up-unchange
RchiOBHmChr6g0306321	RchiOBHm_Chr6g0306321	Putative regulator of chromosome condensation 1/beta-lactamase-inhibitor protein II	4.888	0.0169819	2.28924	1.77001	up	0.837825	0.0103064	1.98689	unchange	up-unchange
RchiOBHmChr6g0309251	RchiOBHm_Chr6g0309251	Putative cucumisin	4.125	0.000141396	2.04439	3.84956	up	0.567783	0.00698095	2.15609	unchange	up-unchange
RchiOBHmChr6g0310241	RchiOBHm_Chr6g0310241	Putative transaminase	2.695	0.037844	1.43029	1.422	up	-0.287168	0.260695	0.583867	unchange	up-unchange
RchiOBHmChr7g0178281	RchiOBHm_Chr7g0178281	Putative loganate O-methyltransferase	2.015	0.0199598	1.01078	1.69984	up	0.764373	0.0487895	1.31167	unchange	up-unchange
RchiOBHmChr7g0178801	RchiOBHm_Chr7g0178801	Putative peroxin-3	1.513	0.00190041	0.597412	2.72115	up	-0.197244	0.493218	0.306961	unchange	up-unchange
RchiOBHmChr7g0180651	RchiOBHm_Chr7g0180651	Putative pectate lyase	13.53	0.0078038	3.75809	2.10769	up	0.330022	0.602505	0.22004	unchange	up-unchange
RchiOBHmChr7g0180821	RchiOBHm_Chr7g0180821	Putative aldose 1-epimerase	1.667	0.00032357	0.737254	3.49003	up	0.941689	0.000732143	3.1354	unchange	up-unchange
RchiOBHmChr7g0189511	RchiOBHm_Chr7g0189511	Putative omega-hydroxypalmitate O-feruloyl transferase	3.064	9.7225e-05	1.61542	4.01222	up	0.665739	0.00382639	2.41721	unchange	up-unchange
RchiOBHmChr7g0190321	RchiOBHm_Chr7g0190321	PREDICTED: SNF1-related protein kinase regulatory subunit gamma-1 [Fragaria vesca subsp. vesca]	1.505	0.026859	0.589763	1.57091	up	-0.134331	0.60602	0.217513	unchange	up-unchange
RchiOBHmChr7g0192351	RchiOBHm_Chr7g0192351	Putative quinolinate synthase	3.208	0.00093821	1.68167	3.0277	up	-0.356155	0.15905	0.798465	unchange	up-unchange
RchiOBHmChr7g0192941	RchiOBHm_Chr7g0192941	Putative transaminase	2.942	0.00029915	1.5568	3.52411	up	-0.414919	0.0731073	1.13604	unchange	up-unchange
RchiOBHmChr7g0193901	RchiOBHm_Chr7g0193901	Putative alpha,alpha-trehalose-phosphate synthase (UDP-forming), Trehalose-phosphatase	1.665	0.00040332	0.735522	3.39435	up	-0.415277	0.146294	0.834773	unchange	up-unchange
RchiOBHmChr7g0195421	RchiOBHm_Chr7g0195421	Putative mitochondrial carrier protein	1.609	9.6012e-05	0.686164	4.01767	up	-0.253312	0.373466	0.427749	unchange	up-unchange
RchiOBHmChr7g0198211	RchiOBHm_Chr7g0198211	Putative oxalate--CoA ligase	2.268	0.00158072	1.18142	2.80115	up	-0.0869206	0.774475	0.110992	unchange	up-unchange
RchiOBHmChr7g0198751	RchiOBHm_Chr7g0198751	Putative thaumatin	19.979	0.00173815	4.32041	2.75991	up	1.28543	0.55732	0.253895	unchange	up-unchange
RchiOBHmChr7g0198901	RchiOBHm_Chr7g0198901	Putative isomerase	1.725	0.00129713	0.786596	2.88702	up	-0.23304	0.380833	0.419265	unchange	up-unchange
RchiOBHmChr7g0199091	RchiOBHm_Chr7g0199091	Putative cytochrome P450	6.327	0.006903	2.66152	2.16096	up	0.67923	0.0024444	2.61183	unchange	up-unchange
RchiOBHmChr7g0199751	RchiOBHm_Chr7g0199751	Putative transcription factor Homobox-WOX family	4.857	0.00025755	2.28007	3.58914	up	-0.597315	0.00457092	2.34	unchange	up-unchange
RchiOBHmChr7g0202091	RchiOBHm_Chr7g0202091	Putative pectinesterase	1.861	0.0012806	0.896078	2.89259	up	-0.953554	8.83e-05	4.05404	unchange	up-unchange
RchiOBHmChr7g0202121	RchiOBHm_Chr7g0202121	Putative translation elongation factor EFG/EF2, P-loop containing nucleoside triphosphate hydrolase	1.564	0.00153601	0.645241	2.81361	up	0.392337	0.10266	0.988598	unchange	up-unchange
RchiOBHmChr7g0209661	RchiOBHm_Chr7g0209661	Putative mitochondrial carrier domain-containing protein	1.525	0.00162214	0.608809	2.78991	up	-0.706183	0.0028484	2.5454	unchange	up-unchange
RchiOBHmChr7g0213161	RchiOBHm_Chr7g0213161	Putative hexosyltransferase	1.721	0.0024022	0.783247	2.61939	up	-0.747126	0.579948	0.236611	unchange	up-unchange
RchiOBHmChr7g0214981	RchiOBHm_Chr7g0214981	Putative pectinacetylesterase/NOTUM, alpha/Beta hydrolase	1.831	0.00034037	0.872632	3.46805	up	-0.783683	0.000410236	3.38697	unchange	up-unchange
RchiOBHmChr7g0220071	RchiOBHm_Chr7g0220071	Putative tetratricopeptide-like helical domain-containing protein	1.594	0.0178597	0.672652	1.74813	up	0.836823	0.000782006	3.10679	unchange	up-unchange
RchiOBHmChr7g0221961	RchiOBHm_Chr7g0221961	Putative ribosome biogenesis factor NIP7	1.797	0.012545	0.84559	1.90153	up	0.79868	0.0228105	1.64187	unchange	up-unchange
RchiOBHmChr7g0241141	RchiOBHm_Chr7g0241141	Putative glucosylceramidase	5.667	0.000144717	2.50259	3.83948	up	-0.993509	1.3e-05	4.88606	unchange	up-unchange
RchiOBHmChr7g0241501	RchiOBHm_Chr7g0241501	Putative DNA helicase	1.586	0.000122579	0.665393	3.91158	up	0.78921	0.00217848	2.66185	unchange	up-unchange
RchiOBHmChr7g0242781	RchiOBHm_Chr7g0242781	Putative protein kinase CAMK-OST1L family	1.541	0.0067604	0.623867	2.17003	up	-0.751203	0.000307995	3.51146	unchange	up-unchange
RchiOBHmChr7g0242801	RchiOBHm_Chr7g0242801	Putative annexin	1.669	0.041603	0.738984	1.38088	up	NA	NA	NA	unchange	up-unchange

## Sheet: cluster 8
Transcription.ID	Protein.accession	Protein.description	Ratio	P.value	log2FC.x	log10p.x	Regulation.x	log2FC.y	FDR	log10p.y	Regulation.y	type
RchiOBHmChr1g0321121	RchiOBHm_Chr1g0321121	Putative anticodon-binding, Brix domain-containing protein	1.993	0.026302	0.994942	1.58001	up	2.29157	5.16e-05	4.28735	up	up-up
RchiOBHmChr1g0368091	RchiOBHm_Chr1g0368091	Ribulose bisphosphate carboxylase/oxygenase activase	1.61	0.048621	0.687061	1.31318	up	1.85621	1.92e-21	20.7167	up	up-up
RchiOBHmChr1g0369301	RchiOBHm_Chr1g0369301	Putative sedoheptulose-bisphosphatase	1.588	0.0062838	0.667211	2.20178	up	2.21532	6.03e-28	27.2197	up	up-up
RchiOBHmChr1g0375831	RchiOBHm_Chr1g0375831	Putative abieta-7,13-dien-18-ol hydroxylase	7.355	2.0869e-05	2.87873	4.6805	up	1.7527	7.32e-19	18.1355	up	up-up
RchiOBHmChr1g0383771	RchiOBHm_Chr1g0383771	Putative PDZ domain, rubredoxin-type	1.981	0.0103982	0.986229	1.98304	up	1.03437	0.000189445	3.72252	up	up-up
RchiOBHmChr2g0093131	RchiOBHm_Chr2g0093131	Putative cytidine deaminase	3.155	0.0027007	1.65764	2.56852	up	1.43983	9.68e-11	10.0141	up	up-up
RchiOBHmChr2g0097641	RchiOBHm_Chr2g0097641	Putative strictosidine synthase transcription factor WD40-like family	1.808	0.00055829	0.854395	3.25314	up	1.05481	0.000139935	3.85407	up	up-up
RchiOBHmChr2g0097671	RchiOBHm_Chr2g0097671	Putative chitinase	11.554	0.00037708	3.53032	3.42357	up	1.41249	1.17e-11	10.9318	up	up-up
RchiOBHmChr2g0110071	RchiOBHm_Chr2g0110071	Putative glycine hydroxymethyltransferase	2.099	0.00103565	1.0697	2.98479	up	2.02724	3.93e-25	24.4056	up	up-up
RchiOBHmChr2g0120091	RchiOBHm_Chr2g0120091	Putative ribonucleoside-diphosphate reductase	3.038	4.0706e-05	1.60312	4.39034	up	2.11209	1.19e-26	25.9245	up	up-up
RchiOBHmChr2g0124821	RchiOBHm_Chr2g0124821	Putative EF-hand domain pair protein	2.38	0.030883	1.25096	1.51028	up	1.326	0.00062319	3.20538	up	up-up
RchiOBHmChr2g0145921	RchiOBHm_Chr2g0145921	Putative flavonoid 3'-monooxygenase	1.83	0.032538	0.871844	1.48761	up	2.57401	3.3e-09	8.48149	up	up-up
RchiOBHmChr2g0155141	RchiOBHm_Chr2g0155141	Putative chlorophyll A-B binding protein	1.764	0.0104034	0.818851	1.98282	up	1.70291	8.52e-05	4.06956	up	up-up
RchiOBHmChr2g0158111	RchiOBHm_Chr2g0158111	Putative glucan endo-1,3-beta-D-glucosidase	1.56	0.034623	0.641546	1.46064	up	3.07113	9.22e-36	35.0353	up	up-up
RchiOBHmChr2g0160611	RchiOBHm_Chr2g0160611	Putative xyloglucan:xyloglucosyl transferase	2.044	0.0113829	1.0314	1.94375	up	3.13132	2.45e-05	4.61083	up	up-up
RchiOBHmChr2g0174431	RchiOBHm_Chr2g0174431	Putative amino acid transporter, transmembrane domain-containing protein	8.593	0.0186232	3.10316	1.72995	up	1.90744	9.64e-07	6.01592	up	up-up
RchiOBHmChr3g0457611	RchiOBHm_Chr3g0457611	Putative NAD(P)-binding domain-containing protein	1.651	0.0066172	0.72334	2.17933	up	3.16767	1.78e-40	39.7496	up	up-up
RchiOBHmChr3g0458761	RchiOBHm_Chr3g0458761	Putative pectinacetylesterase/NOTUM	2.548	0.00161559	1.34937	2.79167	up	1.24022	3.12e-10	9.50585	up	up-up
RchiOBHmChr3g0460081	RchiOBHm_Chr3g0460081	Putative H(+)-transporting two-sector ATPase	1.551	0.0097403	0.633199	2.01143	up	2.31867	0.000716673	3.14468	up	up-up
RchiOBHmChr3g0464511	RchiOBHm_Chr3g0464511	Putative universal stress protein A	2.734	0.003639	1.45101	2.43902	up	1.53042	5.16e-05	4.28735	up	up-up
RchiOBHmChr3g0482331	RchiOBHm_Chr3g0482331	Putative magnesium chelatase	2.687	0.030938	1.426	1.50951	up	1.54626	5.73e-08	7.24185	up	up-up
RchiOBHmChr3g0484051	RchiOBHm_Chr3g0484051	Putative glucan endo-1,3-beta-D-glucosidase	24.1	0.0021959	4.59096	2.65839	up	2.16314	1.34e-05	4.8729	up	up-up
RchiOBHmChr4g0401741	RchiOBHm_Chr4g0401741	Putative ribulose-bisphosphate carboxylase	1.804	0.0124822	0.851199	1.90371	up	1.33891	0.0223947	1.64985	up	up-up
RchiOBHmChr4g0423881	RchiOBHm_Chr4g0423881	Putative START-like domain, Bet v I type allergen	3.691	8.2885e-05	1.88401	4.08152	up	2.48768	4.21e-16	15.3757	up	up-up
RchiOBHmChr4g0423901	RchiOBHm_Chr4g0423901	Putative START-like domain, Bet v I type allergen	2.699	0.00049501	1.43242	3.30539	up	2.61642	6.09e-15	14.2154	up	up-up
RchiOBHmChr4g0423941	RchiOBHm_Chr4g0423941	Putative START-like domain, Bet v I type allergen	5.923	0.00174489	2.56633	2.75823	up	3.02673	1.52e-32	31.8182	up	up-up
RchiOBHmChr4g0424011	RchiOBHm_Chr4g0424011	Putative START-like domain, Bet v I type allergen	2.462	0.00027592	1.29983	3.55922	up	1.66937	1.36e-07	6.86646	up	up-up
RchiOBHmChr4g0424381	RchiOBHm_Chr4g0424381	Putative glycosidase	64.934	2.0527e-05	6.0209	4.68767	up	2.50449	3.39e-31	30.4698	up	up-up
RchiOBHmChr4g0439661	RchiOBHm_Chr4g0439661	Putative long-chain-alcohol oxidase, FAD/NAD(P)-binding domain-containing protein	8.404	0.0043212	3.07108	2.3644	up	1.21637	5.2e-05	4.284	up	up-up
RchiOBHmChr5g0003181	RchiOBHm_Chr5g0003181	Putative peroxidase	3.188	0.00133667	1.67265	2.87398	up	2.35599	1.49e-06	5.82681	up	up-up
RchiOBHmChr5g0027571	RchiOBHm_Chr5g0027571	Putative (S)-2-hydroxy-acid oxidase	4.401	0.0003446	2.13783	3.46268	up	3.27274	1.85e-39	38.7328	up	up-up
RchiOBHmChr5g0028381	RchiOBHm_Chr5g0028381	Putative chlorophyll A-B binding protein	1.764	0.010958	0.818851	1.96027	up	3.08905	1.27e-05	4.8962	up	up-up
RchiOBHmChr5g0037761	RchiOBHm_Chr5g0037761	Putative thiazole biosynthetic enzyme Thi4 family, FAD/NAD(P)-binding domain-containing protein	2.957	0.00106261	1.56413	2.97363	up	2.26842	2.77e-15	14.5575	up	up-up
RchiOBHmChr5g0049251	RchiOBHm_Chr5g0049251	Putative carboxylesterase	2.747	0.00169821	1.45786	2.77001	up	1.14367	4.66e-05	4.33161	up	up-up
RchiOBHmChr5g0050721	RchiOBHm_Chr5g0050721	Putative acyl-CoA desaturase	3.138	0.021899	1.64985	1.65958	up	1.24508	2.6e-10	9.58503	up	up-up
RchiOBHmChr5g0050781	RchiOBHm_Chr5g0050781	Putative transaminase	3.162	0.00188187	1.66084	2.72541	up	3.00624	1.59e-47	46.7986	up	up-up
RchiOBHmChr5g0061451	RchiOBHm_Chr5g0061451	Putative mitogen-activated protein kinase CMGC-MAPK family	1.659	9.6662e-05	0.730314	4.01474	up	1.40359	0.0015433	2.81155	up	up-up
RchiOBHmChr5g0066761	RchiOBHm_Chr5g0066761	Putative transferase	2.221	4.1996e-05	1.15121	4.37679	up	1.10311	0.00286027	2.54359	up	up-up
RchiOBHmChr6g0251101	RchiOBHm_Chr6g0251101	Putative leucine-rich repeat-containing, plant-type, leucine-rich repeat domain, L	1.679	0.0007552	0.747602	3.12194	up	1.05546	0.000212022	3.67362	up	up-up
RchiOBHmChr6g0267861	RchiOBHm_Chr6g0267861	Putative fructose-bisphosphate aldolase	1.558	0.000162813	0.639695	3.78831	up	4.36136	4.1e-73	72.3872	up	up-up
RchiOBHmChr6g0271521	RchiOBHm_Chr6g0271521	Putative phosphate-induced protein	7.772	3.5148e-06	2.95829	5.4541	up	2.43087	6.54e-26	25.1844	up	up-up
RchiOBHmChr6g0271581	RchiOBHm_Chr6g0271581	Putative indole-3-pyruvate monooxygenase	1.652	0.003383	0.724214	2.4707	up	1.12455	0.000643298	3.19159	up	up-up
RchiOBHmChr6g0279531	RchiOBHm_Chr6g0279531	Putative laccase	2.504	0.0031248	1.32423	2.50518	up	1.49123	0.0015748	2.80277	up	up-up
RchiOBHmChr6g0280111	RchiOBHm_Chr6g0280111	Putative 3,8-divinyl protochlorophyllide a 8-vinyl-reductase (NADPH)	2.156	0.0024822	1.10836	2.60516	up	2.52044	2.25e-13	12.6478	up	up-up
RchiOBHmChr6g0285991	RchiOBHm_Chr6g0285991	RmlC-like cupins superfamily protein [Medicago truncatula]	1.795	0.0111768	0.843984	1.95168	up	1.38887	0.000893787	3.04877	up	up-up
RchiOBHmChr6g0291041	RchiOBHm_Chr6g0291041	Putative NAD(P)-binding domain-containing protein	1.532	0.044365	0.615416	1.35296	up	3.49856	1.7e-34	33.7696	up	up-up
RchiOBHmChr6g0292241	RchiOBHm_Chr6g0292241	Putative carboxylesterase	2.09	0.0026011	1.0635	2.58484	up	1.10611	0.0222159	1.65334	up	up-up
RchiOBHmChr6g0293321	RchiOBHm_Chr6g0293321	Putative glutathione transferase	2.167	0.00023616	1.1157	3.62679	up	2.90954	2.99e-42	41.5243	up	up-up
RchiOBHmChr7g0184411	RchiOBHm_Chr7g0184411	Putative primosome PriB/single-strand DNA-binding protein	1.599	0.0067192	0.67717	2.17268	up	1.08622	0.000406548	3.39089	up	up-up
RchiOBHmChr7g0193841	RchiOBHm_Chr7g0193841	Putative aldehyde dehydrogenase (NAD(+))	1.541	0.0175236	0.623867	1.75638	up	3.01349	2.08e-51	50.6819	up	up-up
RchiOBHmChr7g0208781	RchiOBHm_Chr7g0208781	Putative ribose-phosphate diphosphokinase	3.389	0.0094166	1.76086	2.02611	up	1.1531	8.63e-09	8.06399	up	up-up
RchiOBHmChr7g0212791	RchiOBHm_Chr7g0212791	Putative phosphoribulokinase	1.554	0.00077969	0.635987	3.10808	up	2.54988	9.02e-10	9.04479	up	up-up
RchiOBHmChr7g0215201	RchiOBHm_Chr7g0215201	Putative glutathione transferase	2.481	0.045801	1.31092	1.33913	up	3.04197	1.52e-16	15.8182	up	up-up
RchiOBHmChr7g0224761	RchiOBHm_Chr7g0224761	Putative oxidoreductase	1.575	0.0047247	0.655352	2.32563	up	3.43258	1.09e-60	59.9626	up	up-up
RchiOBHmChr7g0243691	RchiOBHm_Chr7g0243691	Putative phosphate-induced protein	2.456	0.0051966	1.29631	2.28428	up	2.51628	0.000348968	3.45721	up	up-up
