# Supplementary material for: Integrative analysis of transcriptome, proteome, and ubiquitome changes during rose petal abscission
Source: Front Plant Sci. 2022 Oct 19;13:1041141. doi: 10.3389/fpls.2022.1041141 (PMC9627506; doi:10.3389/fpls.2022.1041141)
Supplement: Supplementary Table 6 — Correlation between proteome and ubiquitome. [file DataSheet_6.xlsx]

## Sheet: DEPs with ubiquitinated protein
Protein accession	Protein description	stage5/stage3 Ratio	Regulated Type	stage5/stage3 P value	Gene name	Sequence coverage [%]	Mol. weight [kDa]	MS/MS Counts	Peptides	Unique peptides	MS/MS Count S3_1	MS/MS Count S3_2	MS/MS Count S3_3	MS/MS Count S5_1	MS/MS Count S5_2	MS/MS Count S5_3	Peptides S3_1	Peptides S3_2	Peptides S3_3	Peptides S5_1	Peptides S5_2	Peptides S5_3	Unique peptides S3_1	Unique peptides S3_2	Unique peptides S3_3	Unique peptides S5_1	Unique peptides S5_2	Unique peptides S5_3	LFQ intensity S3_1	LFQ intensity S3_2	LFQ intensity S3_3	LFQ intensity S5_1	LFQ intensity S5_2	LFQ intensity S5_3	S3_1	S3_2	S3_3	S5_1	S5_2	S5_3	Subcellular localization	Biological Process	Cellular Component	Molecular Function	KEGG KO No.	KEGG Gene	KEGG pathway	IPR ID	Domain description
RchiOBHm_Chr1g0343491	Putative acyl-CoA desaturase	0.481	Down	0.00107778	---	19.9	34.185	43	5	2	7	6	9	8	8	5	5	5	5	5	5	5	2	2	2	2	2	2	1467100	1481000	1271800	742620	584870	701370	1.409	1.422	1.221	0.713	0.562	0.673	chloroplast	GO:0044699 single-organism process; GO:0008152 metabolic process; GO:0055114 oxidation-reduction process; GO:0044710 single-organism metabolic process;		GO:0016705 oxidoreductase activity, acting on paired donors, with incorporation or reduction of molecular oxygen; GO:0003824 catalytic activity; GO:0016717 oxidoreductase activity, acting on paired donors, with oxidation of a pair of donors resulting in the reduction of molecular oxygen to two molecules of water; GO:0016491 oxidoreductase activity;	K20416	FAD5; palmitoyl-[glycerolipid] 7-desaturase [EC:1.14.19.42]
RchiOBHm_Chr1g0343691	Putative aldehyde oxygenase (deformylating)	0.56	Down	0.022405	---	49.4	73.076	164	25	13	32	32	31	25	19	25	24	25	24	23	20	20	12	13	12	11	9	9	13193000	11844000	10136000	7176100	4813800	7684200	1.443	1.296	1.109	0.785	0.527	0.841	cytoplasm	GO:0044711 single-organism biosynthetic process; GO:0016053 organic acid biosynthetic process; GO:0055114 oxidation-reduction process; GO:0044281 small molecule metabolic process; GO:0044763 single-organism cellular process; GO:0044699 single-organism process; GO:0009058 biosynthetic process; GO:0044255 cellular lipid metabolic process; GO:0006631 fatty acid metabolic process; GO:0044238 primary …		GO:0005506 iron ion binding; GO:0046914 transition metal ion binding; GO:0003824 catalytic activity; GO:0005488 binding; GO:0043167 ion binding; GO:0046872 metal ion binding; GO:0043169 cation binding; GO:0016491 oxidoreductase activity;	K15404	K15404, CER1; aldehyde decarbonylase [EC:4.1.99.5]	mdm00073 Cutin, suberine and wax biosynthesis - Malus domestica (apple); mdm01110 Biosynthesis of secondary metabolites - Malus domestica (apple);	IPR006694; IPR021940;	Fatty acid hydroxylase; Uncharacterised domain Wax2, C-terminal;
RchiOBHm_Chr1g0380731	Putative pectinesterase	0.624	Down	0.0110615	---	27.3	65.609	92	15	15	18	20	15	14	12	13	15	15	13	13	15	13	15	15	13	13	15	13	3113700	2729600	2354700	1938300	1623800	1555600	1.403	1.23	1.061	0.873	0.732	0.701	nucleus	GO:0071554 cell wall organization or biogenesis; GO:0016043 cellular component organization; GO:0071555 cell wall organization; GO:0045229 external encapsulating structure organization; GO:0009987 cellular process; GO:0071840 cellular component organization or biogenesis; GO:0042545 cell wall modification;	GO:0005618 cell wall; GO:0030312 external encapsulating structure; GO:0005623 cell; GO:0044464 cell part; GO:0071944 cell periphery;	GO:0016787 hydrolase activity; GO:0052689 carboxylic ester hydrolase activity; GO:0004857 enzyme inhibitor activity; GO:0098772 molecular function regulator; GO:0030234 enzyme regulator activity; GO:0003824 catalytic activity; GO:0030599 pectinesterase activity; GO:0016788 hydrolase activity, acting on ester bonds;				IPR011050; IPR000070; IPR006501; IPR012334;	Pectin lyase fold/virulence factor; Pectinesterase, catalytic; Pectinesterase inhibitor domain; Pectin lyase fold;
RchiOBHm_Chr3g0463101	Putative pyridoxal 5'-phosphate synthase (glutamine hydrolyzing)	1.674	Up	0.0112987	---	43.7	33.087	39	9	7	5	6	5	7	11	5	7	8	9	9	9	8	5	6	7	7	7	6	807220	818570	590830	1266700	1323700	1118800	0.817	0.829	0.598	1.283	1.34	1.133	cytoplasm	GO:0051188 cofactor biosynthetic process; GO:0009110 vitamin biosynthetic process; GO:0006725 cellular aromatic compound metabolic process; GO:1901615 organic hydroxy compound metabolic process; GO:0042822 pyridoxal phosphate metabolic process; GO:0044699 single-organism process; GO:0009058 biosynthetic process; GO:1901566 organonitrogen compound biosynthetic process; GO:0044237 cellular metaboli…		GO:0003824 catalytic activity;	K06215	pdxS, pdx1; pyridoxal 5'-phosphate synthase pdxS subunit [EC:4.3.3.6]	mdm00750 Vitamin B6 metabolism - Malus domestica (apple);	IPR033755; IPR013785; IPR011060;	PdxS/SNZ N-terminal domain; Aldolase-type TIM barrel; Ribulose-phosphate binding barrel;
RchiOBHm_Chr3g0484331	Putative transcription factor WD40-like family	0.648	Down	0.00133572	---	40	57.791	46	11	10	9	8	10	8	6	5	9	9	10	9	8	9	9	9	10	9	8	9	347370	331100	353190	229710	237750	201230	1.226	1.168	1.246	0.811	0.839	0.71	nucleus			GO:0005515 protein binding; GO:0005488 binding;	K12662	PRPF4, PRP4; U4/U6 small nuclear ribonucleoprotein PRP4	mdm03040 Spliceosome - Malus domestica (apple);	IPR017986; IPR014906; IPR015943; IPR001632;	WD40-repeat-containing domain; Pre-mRNA processing factor 4 (PRP4)-like; WD40/YVTN repeat-like-containing domain; G-protein, beta subunit;
RchiOBHm_Chr4g0413621	Putative UDP-glucuronate 4-epimerase	0.482	Down	0.00156215	---	53.4	51.214	85	20	18	19	16	16	12	12	10	20	18	18	18	17	17	18	16	16	16	15	15	2932500	2208000	2411500	1180300	1319100	1138400	1.572	1.184	1.293	0.633	0.707	0.61	cytoplasm	GO:0008152 metabolic process; GO:0005975 carbohydrate metabolic process; GO:0044238 primary metabolic process; GO:0071704 organic substance metabolic process;		GO:0016853 isomerase activity; GO:0048037 cofactor binding; GO:0016857 racemase and epimerase activity, acting on carbohydrates and derivatives; GO:0016854 racemase and epimerase activity; GO:0003824 catalytic activity; GO:0005488 binding; GO:0050662 coenzyme binding;	K08679	E5.1.3.6; UDP-glucuronate 4-epimerase [EC:5.1.3.6]	mdm00520 Amino sugar and nucleotide sugar metabolism - Malus domestica (apple); mdm01100 Metabolic pathways - Malus domestica (apple);	IPR001509; IPR016040;	NAD-dependent epimerase/dehydratase; NAD(P)-binding domain;
RchiOBHm_Chr1g0370231	Putative phosphoinositide phospholipase C	0.502	Down	0.00064241	---	36.4	55.015	46	11	11	7	11	8	7	7	6	10	10	10	10	11	10	10	10	10	10	11	10	1063000	993620	990400	551380	534090	442680	1.394	1.303	1.299	0.723	0.7	0.581	mitochondria	GO:0050794 regulation of cellular process; GO:0044700 single organism signaling; GO:0051716 cellular response to stimulus; GO:0035556 intracellular signal transduction; GO:0044699 single-organism process; GO:0044238 primary metabolic process; GO:0023052 signaling; GO:0050896 response to stimulus; GO:0071704 organic substance metabolic process; GO:0007165 signal transduction; GO:0008152 metabolic …		GO:0004435 phosphatidylinositol phospholipase C activity; GO:0003824 catalytic activity; GO:0042578 phosphoric ester hydrolase activity; GO:0004629 phospholipase C activity; GO:0005488 binding; GO:0016788 hydrolase activity, acting on ester bonds; GO:0004620 phospholipase activity; GO:0005515 protein binding; GO:0016787 hydrolase activity; GO:0008081 phosphoric diester hydrolase activity; GO:0016…	K05857	PLCD; phosphatidylinositol phospholipase C, delta [EC:3.1.4.11]	mdm00562 Inositol phosphate metabolism - Malus domestica (apple); mdm01100 Metabolic pathways - Malus domestica (apple); mdm04070 Phosphatidylinositol signaling system - Malus domestica (apple); mdm04933 AGE-RAGE signaling pathway in diabetic complications - Malus domestica (apple);	IPR000909; IPR017946; IPR000008; IPR001711;	Phosphatidylinositol-specific phospholipase C, X domain; PLC-like phosphodiesterase, TIM beta/alpha-barrel domain; C2 domain; Phospholipase C, phosphatidylinositol-specific, Y domain;
RchiOBHm_Chr3g0470591	Putative major facilitator superfamily	7.437	Up	0.048302	---	9.7	65.276	11	5	5	1	1	0	3	4	2	3	3	3	4	5	5	3	3	3	4	5	5	62047	57164	13168	345490	334180	304710	0.333	0.307	0.071	1.856	1.795	1.637	vacuolar membrane	GO:0006810 transport; GO:0055085 transmembrane transport; GO:0051179 localization; GO:0051234 establishment of localization;	GO:0031224 intrinsic component of membrane; GO:0016020 membrane; GO:0016021 integral component of membrane; GO:0044425 membrane part;					IPR020846; IPR010658;	Major facilitator superfamily domain; Nodulin-like;
RchiOBHm_Chr4g0423941	"Putative START-like domain, Bet v I type allergen"	5.923	Up	0.00174489	---	82.4	17.566	88	14	8	10	12	8	18	21	19	11	12	12	14	14	14	6	7	7	8	8	8	1488200	2945100	1519700	11399000	13964000	9921900	0.217	0.429	0.221	1.659	2.032	1.444	cytoplasm	GO:0006952 defense response; GO:0050896 response to stimulus; GO:0006950 response to stress; GO:0009607 response to biotic stimulus;						IPR000916; IPR023393;	Bet v I/Major latex protein; START-like domain;
RchiOBHm_Chr1g0384501	Putative WEB family protein	0.455	Down	0.0004157	---	34.5	96.625	81	21	20	17	17	18	12	9	8	19	19	19	15	15	15	18	19	18	15	14	14	1020800	1168300	1174300	538050	538360	453900	1.252	1.432	1.44	0.66	0.66	0.557	nucleus
RchiOBHm_Chr2g0131831	Putative UV excision repair protein Rad23	0.428	Down	0.0044404	---	9.1	40.113	12	4	4	4	3	3	1	0	1	4	3	4	4	3	4	4	3	4	4	3	4	348670	400420	320250	195120	126550	135920	1.37	1.573	1.258	0.767	0.497	0.534	cytoplasm	GO:0033554 cellular response to stress; GO:0051603 proteolysis involved in cellular protein catabolic process; GO:0044257 cellular protein catabolic process; GO:0006725 cellular aromatic compound metabolic process; GO:0006259 DNA metabolic process; GO:0006289 nucleotide-excision repair; GO:0044267 cellular protein metabolic process; GO:0050896 response to stimulus; GO:0044237 cellular metabolic p…	GO:0043226 organelle; GO:0043231 intracellular membrane-bounded organelle; GO:0043229 intracellular organelle; GO:0005634 nucleus; GO:0044464 cell part; GO:0005622 intracellular; GO:0044424 intracellular part; GO:0043227 membrane-bounded organelle; GO:0005623 cell;	GO:0097159 organic cyclic compound binding; GO:1901363 heterocyclic compound binding; GO:0003677 DNA binding; GO:0005488 binding; GO:0003676 nucleic acid binding; GO:0003684 damaged DNA binding; GO:0005515 protein binding;	K10839	RAD23, HR23; UV excision repair protein RAD23	mdm03420 Nucleotide excision repair - Malus domestica (apple); mdm04141 Protein processing in endoplasmic reticulum - Malus domestica (apple);	IPR006636; IPR015940; IPR029071; IPR000626; IPR015360; IPR009060;	Heat shock chaperonin-binding; Ubiquitin-associated domain; Ubiquitin-related domain; Ubiquitin domain; XPC-binding domain; UBA-like;
RchiOBHm_Chr2g0168761	Putative xenobiotic-transporting ATPase	0.362	Down	5.9295e-05	---	16.7	136.42	41	13	12	13	10	9	3	2	4	11	10	10	7	7	7	11	10	9	7	6	7	319380	340040	383450	126230	121350	129670	1.349	1.437	1.62	0.533	0.513	0.548	plasma membrane	GO:0006810 transport; GO:0055085 transmembrane transport; GO:0051179 localization; GO:0051234 establishment of localization;	GO:0031224 intrinsic component of membrane; GO:0016020 membrane; GO:0016021 integral component of membrane; GO:0044425 membrane part;	GO:1901265 nucleoside phosphate binding; GO:0015399 primary active transmembrane transporter activity; GO:0016817 hydrolase activity, acting on acid anhydrides; GO:0016787 hydrolase activity; GO:0016887 ATPase activity; GO:0097159 organic cyclic compound binding; GO:1901363 heterocyclic compound binding; GO:0016462 pyrophosphatase activity; GO:0003824 catalytic activity; GO:0032553 ribonucleotide…	K05658	ABCB1, CD243; ATP-binding cassette, subfamily B (MDR/TAP), member 1 [EC:3.6.3.44]	mdm02010 ABC transporters - Malus domestica (apple);	IPR003593; IPR003439; IPR027417; IPR011527;	AAA+ ATPase domain; ABC transporter-like; P-loop containing nucleoside triphosphate hydrolase; ABC transporter type 1, transmembrane domain;
RchiOBHm_Chr6g0298661	Putative Galactose-binding domain-containing protein	1.603	Up	0.0031634	---	35.5	46.839	111	16	16	15	19	14	22	21	20	15	15	12	16	16	16	15	15	12	16	16	16	8100200	8783400	8078200	15196000	12663000	12163000	0.748	0.811	0.746	1.403	1.169	1.123	chloroplast							IPR006946; IPR008979;	Domain of unknown function DUF642; Galactose-binding domain-like;
RchiOBHm_Chr7g0198901	Putative isomerase	1.725	Up	0.00129713	---	72.2	39.19	79	17	16	12	12	12	15	13	15	16	15	15	17	17	16	15	14	14	16	16	15	1312500	1348800	1227800	2021300	2494600	2191200	0.743	0.764	0.695	1.145	1.413	1.241	cytoskeleton	GO:0044723 single-organism carbohydrate metabolic process; GO:0008152 metabolic process; GO:0044710 single-organism metabolic process; GO:0044281 small molecule metabolic process; GO:0005996 monosaccharide metabolic process; GO:0044699 single-organism process; GO:0044238 primary metabolic process; GO:0005975 carbohydrate metabolic process; GO:0006012 galactose metabolic process; GO:0019318 hexose…		GO:0016853 isomerase activity; GO:0003824 catalytic activity; GO:0016854 racemase and epimerase activity; GO:0016857 racemase and epimerase activity, acting on carbohydrates and derivatives; GO:0003978 UDP-glucose 4-epimerase activity;	K01784	galE, GALE; UDP-glucose 4-epimerase [EC:5.1.3.2]	mdm00052 Galactose metabolism - Malus domestica (apple); mdm00520 Amino sugar and nucleotide sugar metabolism - Malus domestica (apple); mdm01100 Metabolic pathways - Malus domestica (apple);	IPR016040;	NAD(P)-binding domain;
RchiOBHm_Chr7g0221961	Putative ribosome biogenesis factor NIP7	1.797	Up	0.012545	---	36.4	20.657	15	5	5	2	1	3	3	4	2	5	5	5	5	5	5	5	5	5	5	5	5	115740	161560	144140	224230	231360	301920	0.589	0.822	0.734	1.141	1.177	1.537	cytoplasm	GO:0044085 cellular component biogenesis; GO:0016043 cellular component organization; GO:0034622 cellular macromolecular complex assembly; GO:0022613 ribonucleoprotein complex biogenesis; GO:0022618 ribonucleoprotein complex assembly; GO:0042254 ribosome biogenesis; GO:0042255 ribosome assembly; GO:0043933 macromolecular complex subunit organization; GO:0071826 ribonucleoprotein complex subunit o…	GO:0043226 organelle; GO:0043231 intracellular membrane-bounded organelle; GO:0043229 intracellular organelle; GO:0005634 nucleus; GO:0044464 cell part; GO:0005622 intracellular; GO:0044424 intracellular part; GO:0043227 membrane-bounded organelle; GO:0005623 cell;	GO:0097159 organic cyclic compound binding; GO:1901363 heterocyclic compound binding; GO:0003723 RNA binding; GO:0005488 binding; GO:0003676 nucleic acid binding;	K07565	NIP7; 60S ribosome subunit biogenesis protein NIP7		IPR015947; IPR002478;	PUA-like domain; PUA domain;
RchiOBHm_Chr1g0314871	Putative cytochrome P450	3.112	Up	0.00071595	---	5.9	58.782	8	2	2	0	0	0	3	2	3	2	2	2	2	2	2	2	2	2	2	2	2	15277	12199	14822	39251	39563	52760	0.527	0.421	0.511	1.354	1.365	1.821	chloroplast	GO:0044699 single-organism process; GO:0008152 metabolic process; GO:0055114 oxidation-reduction process; GO:0044710 single-organism metabolic process;		GO:0097159 organic cyclic compound binding; GO:1901363 heterocyclic compound binding; GO:0020037 heme binding; GO:0005506 iron ion binding; GO:0046914 transition metal ion binding; GO:0003824 catalytic activity; GO:0005488 binding; GO:0043167 ion binding; GO:0043169 cation binding; GO:0046872 metal ion binding; GO:0016705 oxidoreductase activity, acting on paired donors, with incorporation or red…	K00512	CYP17A; steroid 17alpha-monooxygenase / 17alpha-hydroxyprogesterone deacetylase [EC:1.14.14.19 1.14.14.32]	mdm01100 Metabolic pathways - Malus domestica (apple);
RchiOBHm_Chr3g0463011	Putative terminal organelle assembly protein TopJ	0.128	Down	0.0025164	---	32.4	37.469	15	6	6	5	4	5	0	1	0	6	6	6	5	3	2	6	6	6	5	3	2	172620	192940	125730	24684	27030	11000	1.87	2.09	1.362	0.267	0.293	0.119	cytoskeleton	GO:0006457 protein folding; GO:0009987 cellular process;		GO:0005515 protein binding; GO:0051082 unfolded protein binding; GO:0005488 binding;	K09510	DNAJB4; DnaJ homolog subfamily B member 4		IPR008971; IPR002939; IPR001623;	HSP40/DnaJ peptide-binding; Chaperone DnaJ, C-terminal; DnaJ domain;
RchiOBHm_Chr3g0463701	"Putative glycosyl transferase, family 1, Glycosyltransferase subfamily 4-like protein"	0.62	Down	0.00048154	---	35.8	57.363	40	13	13	7	6	9	5	6	7	11	11	12	12	12	12	11	11	12	12	12	12	793280	778890	805290	536660	467590	469130	1.236	1.214	1.255	0.836	0.729	0.731	chloroplast				K06119	SQD2; sulfoquinovosyltransferase [EC:2.4.1.-]	mdm00561 Glycerolipid metabolism - Malus domestica (apple); mdm01100 Metabolic pathways - Malus domestica (apple);	IPR001296; IPR028098;	Glycosyl transferase, family 1; Glycosyltransferase subfamily 4-like, N-terminal domain;
RchiOBHm_Chr1g0321111	Putative tetratricopeptide-like helical domain-containing protein	1.52	Up	0.039304	---	4.8	102.02	10	3	2	0	1	2	2	3	2	2	2	2	3	3	3	1	1	1	2	2	2	33684	23943	36618	42275	49665	51297	0.851	0.605	0.925	1.068	1.255	1.296	chloroplast			GO:0005515 protein binding; GO:0005488 binding;				IPR011990; IPR013026;	Tetratricopeptide-like helical domain; Tetratricopeptide repeat-containing domain;
RchiOBHm_Chr4g0427101	Putative methionine adenosyltransferase	0.6	Down	0.0125172	---	78.5	35.215	29	24	6	5	5	7	4	4	4	24	24	24	23	22	23	6	6	6	6	6	6	1129500	1248800	1189200	800730	556210	783320	1.187	1.313	1.25	0.842	0.585	0.823	cytoplasm	GO:0051188 cofactor biosynthetic process; GO:0006790 sulfur compound metabolic process; GO:0046500 S-adenosylmethionine metabolic process; GO:0009058 biosynthetic process; GO:0006732 coenzyme metabolic process; GO:1901576 organic substance biosynthetic process; GO:0044237 cellular metabolic process; GO:0044272 sulfur compound biosynthetic process; GO:0044249 cellular biosynthetic process; GO:0051…		GO:0005524 ATP binding; GO:1901265 nucleoside phosphate binding; GO:0001882 nucleoside binding; GO:0043167 ion binding; GO:0000166 nucleotide binding; GO:0004478 methionine adenosyltransferase activity; GO:0097159 organic cyclic compound binding; GO:1901363 heterocyclic compound binding; GO:0032549 ribonucleoside binding; GO:0097367 carbohydrate derivative binding; GO:0003824 catalytic activity; …	K00789	metK; S-adenosylmethionine synthetase [EC:2.5.1.6]	mdm00270 Cysteine and methionine metabolism - Malus domestica (apple); mdm01100 Metabolic pathways - Malus domestica (apple); mdm01110 Biosynthesis of secondary metabolites - Malus domestica (apple); mdm01230 Biosynthesis of amino acids - Malus domestica (apple);	IPR022636; IPR022628; IPR022630; IPR022629;	S-adenosylmethionine synthetase superfamily; S-adenosylmethionine synthetase, N-terminal; S-adenosylmethionine synthetase, C-terminal; S-adenosylmethionine synthetase, central domain;
RchiOBHm_Chr4g0435241	"Putative oxidoreductase, Very-long-chain 3-oxoacyl-CoA synthase"	0.636	Down	0.00081761	---	19.5	56.117	25	7	7	5	4	5	4	4	3	6	5	7	4	6	6	6	5	7	4	6	6	300740	313150	338120	214740	201600	189470	1.158	1.206	1.302	0.827	0.776	0.73	plasma membrane	GO:0044711 single-organism biosynthetic process; GO:0016053 organic acid biosynthetic process; GO:0044281 small molecule metabolic process; GO:0044763 single-organism cellular process; GO:0044699 single-organism process; GO:0044255 cellular lipid metabolic process; GO:0009058 biosynthetic process; GO:0006631 fatty acid metabolic process; GO:0044238 primary metabolic process; GO:0044237 cellular m…	GO:0016020 membrane;	GO:0016746 transferase activity, transferring acyl groups; GO:0016747 transferase activity, transferring acyl groups other than amino-acyl groups; GO:0003824 catalytic activity; GO:0016740 transferase activity;	K15397	KCS; 3-ketoacyl-CoA synthase [EC:2.3.1.199]	mdm00062 Fatty acid elongation - Malus domestica (apple); mdm01100 Metabolic pathways - Malus domestica (apple); mdm01110 Biosynthesis of secondary metabolites - Malus domestica (apple);	IPR016039; IPR013747; IPR013601;	Thiolase-like; 3-Oxoacyl-[acyl-carrier-protein (ACP)] synthase III, C-terminal; FAE1/Type III polyketide synthase-like protein;
RchiOBHm_Chr1g0321121	"Putative anticodon-binding, Brix domain-containing protein"	1.993	Up	0.026302	---	27.6	34.008	11	5	5	0	0	2	4	2	3	3	5	4	5	4	5	3	5	4	5	4	5	55808	72894	35733	101950	117940	107910	0.68	0.889	0.436	1.243	1.438	1.315	nucleus				K14561	IMP4; U3 small nucleolar ribonucleoprotein protein IMP4	mdm03008 Ribosome biogenesis in eukaryotes - Malus domestica (apple);	IPR007109; IPR004154;	Brix domain; Anticodon-binding;
RchiOBHm_Chr5g0039651	Putative calcium/calmodulin-dependent protein kinase CAMK-CDPK family	0.595	Down	0.0047997	---	28.8	61.137	34	10	9	7	10	7	2	4	4	8	10	9	9	6	6	8	9	8	8	5	6	445290	424060	414290	212270	287690	264070	1.305	1.243	1.214	0.622	0.843	0.774	cytoplasm	GO:0016310 phosphorylation; GO:0044267 cellular protein metabolic process; GO:0044238 primary metabolic process; GO:0044237 cellular metabolic process; GO:0006796 phosphate-containing compound metabolic process; GO:0071704 organic substance metabolic process; GO:0008152 metabolic process; GO:0006468 protein phosphorylation; GO:0006793 phosphorus metabolic process; GO:0044260 cellular macromolecul…		GO:0005524 ATP binding; GO:1901265 nucleoside phosphate binding; GO:0016773 phosphotransferase activity, alcohol group as acceptor; GO:0001882 nucleoside binding; GO:0043167 ion binding; GO:0004672 protein kinase activity; GO:0000166 nucleotide binding; GO:0097159 organic cyclic compound binding; GO:1901363 heterocyclic compound binding; GO:0032549 ribonucleoside binding; GO:0097367 carbohydrate …	K13412	CPK; calcium-dependent protein kinase [EC:2.7.11.1]	mdm04626 Plant-pathogen interaction - Malus domestica (apple);	IPR000719; IPR011992; IPR002048; IPR011009;	Protein kinase domain; EF-hand domain pair; EF-hand domain; Protein kinase-like domain;
RchiOBHm_Chr5g0073591	Putative Root phototropism protein	0.207	Down	0.0031431	---	19.5	64.457	26	9	9	7	6	9	1	1	2	9	8	8	6	2	7	9	8	8	6	2	7	233640	209290	253400	58106	27585	58661	1.668	1.494	1.809	0.415	0.197	0.419	chloroplast			GO:0005515 protein binding; GO:0005488 binding;				IPR011333; IPR027356; IPR000210;	SKP1/BTB/POZ domain; NPH3 domain; BTB/POZ domain;
RchiOBHm_Chr5g0075541	Putative Heat shock protein Hsp90 family	0.333	Down	0.00047557	---	56.2	80.06	256	42	28	54	48	50	35	41	28	40	40	41	38	39	38	26	27	28	26	28	27	27591000	24803000	27757000	8634600	10539000	7473200	1.55	1.393	1.559	0.485	0.592	0.42	cytoplasm	GO:0006457 protein folding; GO:0006950 response to stress; GO:0050896 response to stimulus; GO:0009987 cellular process;		GO:0005524 ATP binding; GO:1901265 nucleoside phosphate binding; GO:0001882 nucleoside binding; GO:0043167 ion binding; GO:0005515 protein binding; GO:0000166 nucleotide binding; GO:0097159 organic cyclic compound binding; GO:1901363 heterocyclic compound binding; GO:0032549 ribonucleoside binding; GO:0097367 carbohydrate derivative binding; GO:0032553 ribonucleotide binding; GO:0005488 binding; …	K04079	HSP90A, htpG; molecular chaperone HtpG	mdm04141 Protein processing in endoplasmic reticulum - Malus domestica (apple); mdm04626 Plant-pathogen interaction - Malus domestica (apple);	IPR020568; IPR020575; IPR003594;	Ribosomal protein S5 domain 2-type fold; Heat shock protein Hsp90, N-terminal; Histidine kinase-like ATPase, C-terminal domain;
RchiOBHm_Chr5g0083931	Putative YTH domain-containing protein	0.585	Down	0.0037582	---	25.7	77.734	26	12	11	7	3	5	6	2	3	11	11	12	10	7	9	10	11	11	10	7	9	491750	459260	468770	306020	293250	230930	1.311	1.225	1.25	0.816	0.782	0.616	nucleus			GO:0097159 organic cyclic compound binding; GO:1901363 heterocyclic compound binding; GO:0003723 RNA binding; GO:0005488 binding; GO:0003676 nucleic acid binding;	K20102	YTHDF; YTH domain-containing family protein		IPR007275;	YTH domain;
RchiOBHm_Chr6g0271831	Putative potassium transporter	0.562	Down	0.0043007	---	11	94.652	13	6	6	2	5	3	0	1	2	4	6	5	4	6	4	4	6	5	4	6	4	101330	107630	85194	47709	59396	58077	1.324	1.406	1.113	0.623	0.776	0.759	plasma membrane	GO:0098655 cation transmembrane transport; GO:0034220 ion transmembrane transport; GO:0098660 inorganic ion transmembrane transport; GO:0030001 metal ion transport; GO:0071804 cellular potassium ion transport; GO:0044763 single-organism cellular process; GO:0044699 single-organism process; GO:0051234 establishment of localization; GO:0006810 transport; GO:0055085 transmembrane transport; GO:00068…	GO:0016020 membrane;	GO:0046873 metal ion transmembrane transporter activity; GO:0015075 ion transmembrane transporter activity; GO:0022892 substrate-specific transporter activity; GO:0015077 monovalent inorganic cation transmembrane transporter activity; GO:0022890 inorganic cation transmembrane transporter activity; GO:0008324 cation transmembrane transporter activity; GO:0022891 substrate-specific transmembrane tr…
RchiOBHm_Chr6g0287381	Putative long-chain-alcohol oxidase	0.4	Down	0.00083779	---	47.7	90.008	115	25	25	27	26	21	14	11	16	25	24	25	20	16	21	25	24	25	20	16	21	2014700	1906700	2011800	852710	640410	881170	1.455	1.377	1.453	0.616	0.463	0.636	plasma membrane	GO:0044699 single-organism process; GO:0008152 metabolic process; GO:0055114 oxidation-reduction process; GO:0044710 single-organism metabolic process;		GO:0046577 long-chain-alcohol oxidase activity; GO:1901265 nucleoside phosphate binding; GO:0050660 flavin adenine dinucleotide binding; GO:0043167 ion binding; GO:0000166 nucleotide binding; GO:0048037 cofactor binding; GO:0016491 oxidoreductase activity; GO:0016614 oxidoreductase activity, acting on CH-OH group of donors; GO:1901363 heterocyclic compound binding; GO:0097159 organic cyclic compo…	K17756	FAO3; long-chain-alcohol oxidase [EC:1.1.3.20]		IPR000172; IPR007867; IPR023753;	Glucose-methanol-choline oxidoreductase, N-terminal; Glucose-methanol-choline oxidoreductase, C-terminal; FAD/NAD(P)-binding domain;
RchiOBHm_Chr1g0329311	Putative oxidoreductase	2.313	Up	0.041384	---	32.1	36.99	17	7	7	3	2	1	4	3	4	6	5	5	7	6	6	6	5	5	7	6	6	149640	111010	87614	168100	365810	271350	0.778	0.577	0.456	0.874	1.903	1.411	cytoplasm	GO:0044699 single-organism process; GO:0008152 metabolic process; GO:0055114 oxidation-reduction process; GO:0044710 single-organism metabolic process;		GO:0003824 catalytic activity; GO:0016491 oxidoreductase activity;	K22374			IPR023210;	NADP-dependent oxidoreductase domain;
RchiOBHm_Chr6g0298221	Putative cellulose synthase (UDP-forming) chromatin regulator PHD family	0.347	Down	0.0003765	---	25.6	120.75	47	18	14	10	11	13	5	5	3	17	16	17	11	14	11	14	12	13	8	12	8	822920	750240	622040	239980	278270	244140	1.669	1.522	1.262	0.487	0.565	0.495	plasma membrane	GO:0016051 carbohydrate biosynthetic process; GO:0044711 single-organism biosynthetic process; GO:0006073 cellular glucan metabolic process; GO:0000271 polysaccharide biosynthetic process; GO:0030243 cellulose metabolic process; GO:0044042 glucan metabolic process; GO:0044763 single-organism cellular process; GO:0044699 single-organism process; GO:0033692 cellular polysaccharide biosynthetic proc…	GO:0016020 membrane;	GO:0016759 cellulose synthase activity; GO:0016758 transferase activity, transferring hexosyl groups; GO:0043167 ion binding; GO:0008194 UDP-glycosyltransferase activity; GO:0046527 glucosyltransferase activity; GO:0005515 protein binding; GO:0008270 zinc ion binding; GO:0046914 transition metal ion binding; GO:0003824 catalytic activity; GO:0005488 binding; GO:0035251 UDP-glucosyltransferase act…	K10999	CESA; cellulose synthase A [EC:2.4.1.12]		IPR027934; IPR001841; IPR013083; IPR029044;	Cellulose synthase, RING-type zinc finger; Zinc finger, RING-type; Zinc finger, RING/FYVE/PHD-type; Nucleotide-diphospho-sugar transferases;
RchiOBHm_Chr1g0330121	Putative ubiquitinyl hydrolase 1	2.328	Up	0.0197437	---	23.5	40.607	6	6	3	0	1	0	3	1	1	5	5	4	6	6	5	2	2	1	3	3	2	41455	34052	28323	112830	61866	67116	0.72	0.591	0.492	1.959	1.074	1.165	nucleus			GO:0005515 protein binding; GO:0005488 binding;				IPR008974; IPR002083;	TRAF-like; MATH/TRAF domain;
RchiOBHm_Chr6g0302451	"Putative IQ motif, EF-hand binding protein"	0.507	Down	0.00117645	---	13.5	84.083	25	6	6	5	5	6	3	4	2	6	6	6	5	5	4	6	6	6	5	5	4	232800	304710	256470	128470	135440	138300	1.168	1.528	1.286	0.644	0.679	0.694	nucleus			GO:0005515 protein binding; GO:0005488 binding;				IPR025064;	Domain of unknown function DUF4005;
RchiOBHm_Chr7g0177061	"Putative oligopeptide transporter, OPT superfamily"	0.423	Down	0.0012031	---	6.3	77.265	11	3	3	2	2	2	2	1	2	3	2	3	3	2	2	3	2	3	3	2	2	84757	108450	90774	34330	43469	42426	1.258	1.61	1.347	0.51	0.645	0.63	plasma membrane	GO:0006810 transport; GO:0055085 transmembrane transport; GO:0051179 localization; GO:0051234 establishment of localization;
RchiOBHm_Chr7g0212781	PREDICTED: secretory carrier-associated membrane protein 4 isoform X1 [Fragaria vesca subsp. vesca]	0.633	Down	0.033123	---	27.9	30.147	21	4	4	4	3	3	4	4	3	4	4	4	4	4	4	4	4	4	4	4	4	527790	412070	388560	331930	281680	227420	1.46	1.14	1.075	0.918	0.779	0.629	plasma membrane	GO:0045184 establishment of protein localization; GO:0006810 transport; GO:0071702 organic substance transport; GO:0051179 localization; GO:0033036 macromolecule localization; GO:0008104 protein localization; GO:0015031 protein transport; GO:0051234 establishment of localization;	GO:0031224 intrinsic component of membrane; GO:0016020 membrane; GO:0016021 integral component of membrane; GO:0044425 membrane part;		K19995	SCAMP; secretory carrier-associated membrane protein
RchiOBHm_Chr1g0330141	Putative ubiquitinyl hydrolase 1	2.561	Up	0.0041848	---	20.2	48.095	28	6	1	4	3	3	5	7	6	6	6	6	6	6	6	1	1	1	1	1	1	164720	286300	202490	573150	521770	578010	0.425	0.738	0.522	1.478	1.346	1.491	cytoplasm			GO:0005515 protein binding; GO:0005488 binding;				IPR008974; IPR002083;	TRAF-like; MATH/TRAF domain;
RchiOBHm_Chr1g0314131	Putative linoleate 13S-lipoxygenase	0.627	Down	0.0020755	---	44.7	102.76	69	41	7	13	13	12	10	8	13	40	39	40	37	38	37	7	6	6	5	6	6	11685000	12309000	13223000	8658100	7396700	7279400	1.158	1.22	1.31	0.858	0.733	0.721	chloroplast	GO:0044699 single-organism process; GO:0008152 metabolic process; GO:0055114 oxidation-reduction process; GO:0044710 single-organism metabolic process;		GO:0016702 oxidoreductase activity, acting on single donors with incorporation of molecular oxygen, incorporation of two atoms of oxygen; GO:0016701 oxidoreductase activity, acting on single donors with incorporation of molecular oxygen; GO:0003824 catalytic activity; GO:0005488 binding; GO:0051213 dioxygenase activity; GO:0043167 ion binding; GO:0043169 cation binding; GO:0046872 metal ion bindi…	K00454	LOX2S; lipoxygenase [EC:1.13.11.12]	mdm00591 Linoleic acid metabolism - Malus domestica (apple); mdm00592 alpha-Linolenic acid metabolism - Malus domestica (apple); mdm01100 Metabolic pathways - Malus domestica (apple); mdm01110 Biosynthesis of secondary metabolites - Malus domestica (apple);	IPR027433; IPR001024; IPR013819;	Lipoxygenase, domain 3; PLAT/LH2 domain; Lipoxygenase, C-terminal;
RchiOBHm_Chr1g0314151	Putative linoleate 13S-lipoxygenase	0.596	Down	0.0006424	---	62.8	102.84	344	52	19	67	70	67	48	48	44	50	48	51	47	47	46	18	17	19	17	18	18	50800000	50157000	52466000	33316000	30298000	27789000	1.245	1.229	1.286	0.816	0.743	0.681	chloroplast	GO:0044699 single-organism process; GO:0008152 metabolic process; GO:0055114 oxidation-reduction process; GO:0044710 single-organism metabolic process;		GO:0016702 oxidoreductase activity, acting on single donors with incorporation of molecular oxygen, incorporation of two atoms of oxygen; GO:0016701 oxidoreductase activity, acting on single donors with incorporation of molecular oxygen; GO:0003824 catalytic activity; GO:0005488 binding; GO:0051213 dioxygenase activity; GO:0043167 ion binding; GO:0043169 cation binding; GO:0046872 metal ion bindi…	K00454	LOX2S; lipoxygenase [EC:1.13.11.12]	mdm00591 Linoleic acid metabolism - Malus domestica (apple); mdm00592 alpha-Linolenic acid metabolism - Malus domestica (apple); mdm01100 Metabolic pathways - Malus domestica (apple); mdm01110 Biosynthesis of secondary metabolites - Malus domestica (apple);	IPR027433; IPR001024; IPR013819;	Lipoxygenase, domain 3; PLAT/LH2 domain; Lipoxygenase, C-terminal;
RchiOBHm_Chr1g0314781	Putative chaperone DnaJ	0.614	Down	0.0181982	---	14	47.732	5	3	3	1	2	0	1	1	0	2	3	3	2	3	0	2	3	3	2	3	0	39316	42234	0	23635	26446	0	1.195	1.283		0.718	0.804		chloroplast	GO:0006457 protein folding; GO:0050896 response to stimulus; GO:0006950 response to stress; GO:0009987 cellular process; GO:0009408 response to heat; GO:0009628 response to abiotic stimulus; GO:0009266 response to temperature stimulus;		GO:0005524 ATP binding; GO:0031072 heat shock protein binding; GO:1901265 nucleoside phosphate binding; GO:0001882 nucleoside binding; GO:0043167 ion binding; GO:0005515 protein binding; GO:0000166 nucleotide binding; GO:0097159 organic cyclic compound binding; GO:1901363 heterocyclic compound binding; GO:0032549 ribonucleoside binding; GO:0097367 carbohydrate derivative binding; GO:0032553 ribon…	K03686	dnaJ; molecular chaperone DnaJ		IPR008971; IPR002939; IPR001623; IPR001305;	HSP40/DnaJ peptide-binding; Chaperone DnaJ, C-terminal; DnaJ domain; Heat shock protein DnaJ, cysteine-rich domain;
RchiOBHm_Chr1g0330551	Putative SUN domain-containing protein	1.508	Up	0.0150442	---	28.9	49.786	33	9	9	6	5	2	6	7	7	8	8	7	8	7	8	8	8	7	8	7	8	184170	154000	133600	220590	255440	235700	0.934	0.781	0.677	1.118	1.295	1.195	chloroplast				K19347	SUN1_2; SUN domain-containing protein 1/2		IPR012919;	SUN domain;
RchiOBHm_Chr1g0333011	Putative protein-serine/threonine kinase CMGC-CDK-Pl family	2.805	Up	0.00142169	---	20.1	33.856	10	5	3	2	0	2	2	1	3	5	4	5	5	5	5	3	2	3	3	3	3	36845	44320	31662	116820	111890	87714	0.515	0.619	0.443	1.633	1.564	1.226	cytoplasm	GO:0016310 phosphorylation; GO:0044267 cellular protein metabolic process; GO:0044238 primary metabolic process; GO:0044237 cellular metabolic process; GO:0006796 phosphate-containing compound metabolic process; GO:0071704 organic substance metabolic process; GO:0008152 metabolic process; GO:0006468 protein phosphorylation; GO:0006793 phosphorus metabolic process; GO:0044260 cellular macromolecul…		GO:0005524 ATP binding; GO:1901265 nucleoside phosphate binding; GO:0016773 phosphotransferase activity, alcohol group as acceptor; GO:0001882 nucleoside binding; GO:0043167 ion binding; GO:0004672 protein kinase activity; GO:0000166 nucleotide binding; GO:0097159 organic cyclic compound binding; GO:1901363 heterocyclic compound binding; GO:0032549 ribonucleoside binding; GO:0097367 carbohydrate …	K02206	CDK2; cyclin-dependent kinase 2 [EC:2.7.11.22]		IPR000719; IPR011009;	Protein kinase domain; Protein kinase-like domain;
RchiOBHm_Chr1g0314931	Putative polygalacturonase	0.353	Down	0.00080337	---	37.2	38.94	27	7	7	6	7	7	3	2	2	7	7	6	6	4	5	7	7	6	6	4	5	1212900	1477700	1230300	471630	382210	529300	1.372	1.672	1.392	0.534	0.432	0.599	vacuolar membrane			GO:0005515 protein binding; GO:0005488 binding;				IPR013210; IPR032675;	Leucine-rich repeat-containing N-terminal, plant-type; Leucine-rich repeat domain, L domain-like;
RchiOBHm_Chr1g0316091	Putative cellulose synthase (UDP-forming) chromatin regulator PHD family	0.364	Down	0.00195618	---	19.5	120.94	31	12	10	9	6	5	4	3	4	11	10	11	9	9	11	9	8	9	8	7	9	610860	655090	428530	190100	220750	205130	1.586	1.701	1.113	0.494	0.573	0.533	plasma membrane	GO:0016051 carbohydrate biosynthetic process; GO:0044711 single-organism biosynthetic process; GO:0006073 cellular glucan metabolic process; GO:0000271 polysaccharide biosynthetic process; GO:0030243 cellulose metabolic process; GO:0044042 glucan metabolic process; GO:0044763 single-organism cellular process; GO:0044699 single-organism process; GO:0033692 cellular polysaccharide biosynthetic proc…	GO:0016020 membrane;	GO:0016759 cellulose synthase activity; GO:0016758 transferase activity, transferring hexosyl groups; GO:0003824 catalytic activity; GO:0035251 UDP-glucosyltransferase activity; GO:0016760 cellulose synthase (UDP-forming) activity; GO:0008194 UDP-glycosyltransferase activity; GO:0046527 glucosyltransferase activity; GO:0016757 transferase activity, transferring glycosyl groups; GO:0016740 transfe…	K10999	CESA; cellulose synthase A [EC:2.4.1.12]		IPR027934; IPR013083; IPR029044;	Cellulose synthase, RING-type zinc finger; Zinc finger, RING/FYVE/PHD-type; Nucleotide-diphospho-sugar transferases;
RchiOBHm_Chr1g0336731	Putative transcription factor WD40-like family	2.081	Up	0.0186975	---	16.9	43.495	20	5	3	3	2	4	3	4	4	4	3	4	4	4	5	2	1	2	2	2	3	83769	49661	76437	178900	126870	130880	0.777	0.461	0.709	1.66	1.177	1.215	cytoplasm,nucleus			GO:0005515 protein binding; GO:0005488 binding;	K14003	PREB, SEC12; prolactin regulatory element-binding protein	mdm04141 Protein processing in endoplasmic reticulum - Malus domestica (apple);	IPR017986; IPR015943;	WD40-repeat-containing domain; WD40/YVTN repeat-like-containing domain;
RchiOBHm_Chr1g0348141	Putative oxidoreductase	4.352	Up	0.0099414	---	26.6	69.893	45	13	11	7	5	1	11	8	13	11	11	7	13	12	13	10	10	6	11	11	11	517830	345600	180460	1598300	1149900	1793600	0.556	0.371	0.194	1.717	1.235	1.927	chloroplast	GO:0044699 single-organism process; GO:0008152 metabolic process; GO:0055114 oxidation-reduction process; GO:0044710 single-organism metabolic process;		GO:0016702 oxidoreductase activity, acting on single donors with incorporation of molecular oxygen, incorporation of two atoms of oxygen; GO:0016701 oxidoreductase activity, acting on single donors with incorporation of molecular oxygen; GO:0003824 catalytic activity; GO:0051213 dioxygenase activity; GO:0016491 oxidoreductase activity;	K17912	CCD7; 9-cis-beta-carotene 9',10'-cleaving dioxygenase [EC:1.13.11.68]	mdm00906 Carotenoid biosynthesis - Malus domestica (apple); mdm01110 Biosynthesis of secondary metabolites - Malus domestica (apple);
RchiOBHm_Chr1g0351371	Putative carboxylesterase	2.415	Up	9.8322e-05	---	34.1	36.866	25	8	8	4	5	1	5	6	4	6	6	4	6	7	6	6	6	4	6	7	6	146920	161380	141220	335960	385560	364650	0.574	0.631	0.552	1.313	1.506	1.425	cytoplasm	GO:0008152 metabolic process;		GO:0016787 hydrolase activity; GO:0003824 catalytic activity;				IPR029058; IPR013094;	Alpha/Beta hydrolase fold; Alpha/beta hydrolase fold-3;
RchiOBHm_Chr1g0318401	Putative methionine N(alpha)-acetyltransferase NatB transcription regulator GNAT family	0.53	Down	0.002099	---	40.3	22.089	14	4	4	0	2	4	3	3	2	3	3	4	3	3	3	3	3	4	3	3	3	147830	148410	129780	76075	84998	64703	1.361	1.366	1.195	0.7	0.782	0.596	chloroplast			GO:0016746 transferase activity, transferring acyl groups; GO:0008080 N-acetyltransferase activity; GO:0003824 catalytic activity; GO:0016740 transferase activity; GO:0016747 transferase activity, transferring acyl groups other than amino-acyl groups; GO:0016407 acetyltransferase activity; GO:0016410 N-acyltransferase activity;	K20791	NAA10_11, ARD1_2; N-alpha-acetyltransferase 10/11 [EC:2.3.1.255]		IPR000182; IPR016181;	GNAT domain; Acyl-CoA N-acyltransferase;
RchiOBHm_Chr1g0325641	"Putative protein ENHANCED DISEASE RESISTANCE 2, START"	0.517	Down	0.00128375	---	9.6	76.972	21	5	5	4	6	4	2	2	3	4	5	5	5	5	5	4	5	5	5	5	5	350900	360120	301080	154330	187260	181300	1.372	1.408	1.177	0.603	0.732	0.709	cytoplasm			GO:0008289 lipid binding; GO:0005488 binding;				IPR009769; IPR002913; IPR023393;	Protein ENHANCED DISEASE RESISTANCE 2, C-terminal; START domain; START-like domain;
RchiOBHm_Chr1g0326411	plant/MOJ9-14 protein [Medicago truncatula]	0.642	Down	0.00168348	---	14.3	125.76	28	9	9	9	6	6	2	3	2	8	8	8	7	7	7	8	8	8	7	7	7	181630	201870	192540	111370	127530	131160	1.152	1.28	1.221	0.706	0.809	0.832	nucleus							IPR014770; IPR014772;	Munc13 homology 1; Mammalian uncoordinated homology 13, domain 2;
RchiOBHm_Chr1g0327981	Putative endopeptidase Clp	0.65	Down	0.0028611	---	24.1	35.276	25	4	4	5	4	4	4	3	5	4	4	4	3	4	4	4	4	4	3	4	4	667530	633100	700210	481190	428450	391350	1.213	1.15	1.272	0.874	0.779	0.711	chloroplast	GO:0006508 proteolysis; GO:0008152 metabolic process; GO:0043170 macromolecule metabolic process; GO:0019538 protein metabolic process; GO:0044238 primary metabolic process; GO:0071704 organic substance metabolic process;		GO:0004252 serine-type endopeptidase activity; GO:0004175 endopeptidase activity; GO:0008233 peptidase activity; GO:0003824 catalytic activity; GO:0017171 serine hydrolase activity; GO:0008236 serine-type peptidase activity; GO:0070011 peptidase activity, acting on L-amino acid peptides; GO:0016787 hydrolase activity;	K01358	clpP, CLPP; ATP-dependent Clp protease, protease subunit [EC:3.4.21.92]		IPR029045;	ClpP/crotonase-like domain;
RchiOBHm_Chr1g0331511	"Putative xylogalacturonan beta-1,3-xylosyltransferase"	0.569	Down	0.027665	---	18.9	52.227	21	6	5	5	4	4	4	2	2	6	5	6	5	4	6	5	5	5	5	4	5	155360	112140	149110	87449	90116	59356	1.426	1.03	1.369	0.803	0.827	0.545	mitochondria
RchiOBHm_Chr1g0331941	Putative transcription factor C2H2 family	0.593	Down	0.0024842	---	28.3	59.316	33	11	11	9	6	8	4	4	2	10	7	9	9	9	7	10	7	9	9	9	7	399950	374880	431410	235160	267440	212510	1.249	1.171	1.347	0.734	0.835	0.664	cytoplasm		GO:0043226 organelle; GO:0043231 intracellular membrane-bounded organelle; GO:0043229 intracellular organelle; GO:0005634 nucleus; GO:0044464 cell part; GO:0005622 intracellular; GO:0044424 intracellular part; GO:0043227 membrane-bounded organelle; GO:0005623 cell;	GO:0097159 organic cyclic compound binding; GO:1901363 heterocyclic compound binding; GO:0046914 transition metal ion binding; GO:0005488 binding; GO:0003676 nucleic acid binding; GO:0043167 ion binding; GO:0046872 metal ion binding; GO:0043169 cation binding; GO:0008270 zinc ion binding;	K12827	SF3A3, SAP61, PRP9; splicing factor 3A subunit 3	mdm03040 Spliceosome - Malus domestica (apple);	IPR000690; IPR021966; IPR031774; IPR024598;	Zinc finger, C2H2-type matrin; Splicing factor SF3a60 binding domain; SF3A3 domain; Domain of unknown function DUF3449;
RchiOBHm_Chr1g0354071	Putative remorin	2.407	Up	0.028042	---	29.1	21.469	12	3	3	1	2	1	3	2	3	2	3	3	3	3	3	2	3	3	3	3	3	93677	98412	50427	177270	255480	150820	0.68	0.715	0.366	1.288	1.856	1.095	mitochondria							IPR005516; IPR005518;	Remorin, C-terminal; Remorin, N-terminal;
RchiOBHm_Chr1g0358211	Putative chitinase	2.121	Up	0.0044212	---	25.5	26.487	14	3	3	2	3	1	3	3	2	3	3	2	3	3	3	3	3	2	3	3	3	63467	94359	76445	151210	187220	158450	0.521	0.774	0.627	1.241	1.536	1.3	extracellular	GO:0008152 metabolic process; GO:0005975 carbohydrate metabolic process; GO:0044238 primary metabolic process; GO:0071704 organic substance metabolic process;		GO:0004553 hydrolase activity, hydrolyzing O-glycosyl compounds; GO:0016787 hydrolase activity; GO:0003824 catalytic activity; GO:0016798 hydrolase activity, acting on glycosyl bonds;	K01183	E3.2.1.14; chitinase [EC:3.2.1.14]	mdm00520 Amino sugar and nucleotide sugar metabolism - Malus domestica (apple); mdm01100 Metabolic pathways - Malus domestica (apple);	IPR001223; IPR017853; IPR013781;	Glycoside hydrolase family 18, catalytic domain; Glycoside hydrolase superfamily; Glycoside hydrolase, catalytic domain;
RchiOBHm_Chr1g0333181	Putative cytochrome P450	0.468	Down	0.0038988	---	10.5	62.762	14	5	5	3	3	2	2	2	2	5	5	5	3	4	4	5	5	5	3	4	4	242660	234380	343420	131120	130970	122130	1.209	1.167	1.71	0.653	0.652	0.608	chloroplast	GO:0044699 single-organism process; GO:0008152 metabolic process; GO:0055114 oxidation-reduction process; GO:0044710 single-organism metabolic process;		GO:0097159 organic cyclic compound binding; GO:1901363 heterocyclic compound binding; GO:0020037 heme binding; GO:0005506 iron ion binding; GO:0046914 transition metal ion binding; GO:0003824 catalytic activity; GO:0005488 binding; GO:0043167 ion binding; GO:0043169 cation binding; GO:0046872 metal ion binding; GO:0016705 oxidoreductase activity, acting on paired donors, with incorporation or red…	K21995	CYP77A4; unsaturated fatty acid epoxidase [EC:1.14.-.-]
RchiOBHm_Chr1g0336121	"PREDICTED: leucine--tRNA ligase, cytoplasmic [Prunus mume]"	0.586	Down	0.0041838	---	47.3	123.52	35	35	10	8	7	8	4	5	3	35	31	33	32	33	30	10	8	8	8	8	7	809610	619630	730820	455580	421240	387900	1.418	1.086	1.28	0.798	0.738	0.68	cytoplasm	GO:0006518 peptide metabolic process; GO:0006725 cellular aromatic compound metabolic process; GO:0044267 cellular protein metabolic process; GO:0044699 single-organism process; GO:0009058 biosynthetic process; GO:1901566 organonitrogen compound biosynthetic process; GO:0043039 tRNA aminoacylation; GO:0044237 cellular metabolic process; GO:0071704 organic substance metabolic process; GO:0008152 m…	GO:0044424 intracellular part; GO:0005623 cell; GO:0044464 cell part; GO:0005622 intracellular; GO:0005737 cytoplasm;	GO:0016876 ligase activity, forming aminoacyl-tRNA and related compounds; GO:0002161 aminoacyl-tRNA editing activity; GO:0005524 ATP binding; GO:0052689 carboxylic ester hydrolase activity; GO:1901265 nucleoside phosphate binding; GO:0016875 ligase activity, forming carbon-oxygen bonds; GO:0001882 nucleoside binding; GO:0043167 ion binding; GO:0016874 ligase activity; GO:0016787 hydrolase activit…	K01869	LARS, leuS; leucyl-tRNA synthetase [EC:6.1.1.4]	mdm00970 Aminoacyl-tRNA biosynthesis - Malus domestica (apple);	IPR014729; IPR013155; IPR009008; IPR002300; IPR009080;	Rossmann-like alpha/beta/alpha sandwich fold; Methionyl/Valyl/Leucyl/Isoleucyl-tRNA synthetase, anticodon-binding; Valyl/Leucyl/Isoleucyl-tRNA synthetase, editing domain; Aminoacyl-tRNA synthetase, class Ia; Aminoacyl-tRNA synthetase, class Ia, anticodon-binding;
RchiOBHm_Chr1g0358401	Putative chitinase	1.575	Up	0.027081	---	44.5	32.441	39	12	12	5	6	4	9	10	5	10	10	9	12	10	11	10	10	9	12	10	11	3092700	3306300	2215200	4020100	4798600	4748200	0.837	0.894	0.599	1.087	1.298	1.284	endoplasmic reticulum	GO:0008152 metabolic process; GO:0005975 carbohydrate metabolic process; GO:0044238 primary metabolic process; GO:0071704 organic substance metabolic process;		GO:0004553 hydrolase activity, hydrolyzing O-glycosyl compounds; GO:0016787 hydrolase activity; GO:0003824 catalytic activity; GO:0016798 hydrolase activity, acting on glycosyl bonds;	K01183	E3.2.1.14; chitinase [EC:3.2.1.14]	mdm00520 Amino sugar and nucleotide sugar metabolism - Malus domestica (apple); mdm01100 Metabolic pathways - Malus domestica (apple);	IPR001223; IPR017853; IPR013781;	Glycoside hydrolase family 18, catalytic domain; Glycoside hydrolase superfamily; Glycoside hydrolase, catalytic domain;
RchiOBHm_Chr1g0340731	Putative transcription regulator SWI/SNF-BAF60b family	0.449	Down	0.043562	---	24.2	16.019	9	2	2	2	1	2	1	2	1	2	2	2	2	1	2	2	2	2	2	1	2	48455	52423	29793	19013	0	20114	1.427	1.544	0.877	0.56		0.592	mitochondria			GO:0005515 protein binding; GO:0005488 binding;				IPR003121; IPR019835;	SWIB/MDM2 domain; SWIB domain;
RchiOBHm_Chr1g0342581	"Putative tubulin-specific chaperone D, tubulin-folding cofactor D"	0.649	Down	0.00038446	---	7.5	140.68	19	7	7	4	4	5	1	2	3	6	7	6	6	6	6	6	7	6	6	6	6	134860	131700	127590	91577	82282	82085	1.245	1.216	1.178	0.845	0.759	0.758	plasma membrane			GO:0005488 binding;	K21767	TBCD; tubulin-specific chaperone D		IPR022577; IPR011989; IPR016024;	Tubulin-specific chaperone D, C-terminal; Armadillo-like helical; Armadillo-type fold;
RchiOBHm_Chr1g0343791	Putative aldehyde oxygenase (deformylating)	0.598	Down	0.039417	---	30.6	72.349	47	16	3	10	9	9	7	4	8	15	16	15	15	15	15	3	3	3	2	2	3	3230300	3675900	3092500	2208200	1381100	2390400	1.213	1.38	1.161	0.829	0.519	0.898	nucleus	GO:0044711 single-organism biosynthetic process; GO:0016053 organic acid biosynthetic process; GO:0055114 oxidation-reduction process; GO:0044281 small molecule metabolic process; GO:0044763 single-organism cellular process; GO:0044699 single-organism process; GO:0009058 biosynthetic process; GO:0044255 cellular lipid metabolic process; GO:0006631 fatty acid metabolic process; GO:0044238 primary …		GO:0005506 iron ion binding; GO:0046914 transition metal ion binding; GO:0003824 catalytic activity; GO:0005488 binding; GO:0043167 ion binding; GO:0046872 metal ion binding; GO:0043169 cation binding; GO:0016491 oxidoreductase activity;	K15404	K15404, CER1; aldehyde decarbonylase [EC:4.1.99.5]	mdm00073 Cutin, suberine and wax biosynthesis - Malus domestica (apple); mdm01110 Biosynthesis of secondary metabolites - Malus domestica (apple);	IPR006694; IPR021940;	Fatty acid hydroxylase; Uncharacterised domain Wax2, C-terminal;
RchiOBHm_Chr1g0344441	PREDICTED: eukaryotic translation initiation factor 4G [Fragaria vesca subsp. vesca]	0.536	Down	0.000118556	---	13.7	162.04	47	13	13	10	10	8	6	6	7	12	12	11	10	10	9	12	12	11	10	10	9	559070	571820	507070	283160	302740	292590	1.333	1.363	1.209	0.675	0.722	0.698	nucleus			GO:0097159 organic cyclic compound binding; GO:1901363 heterocyclic compound binding; GO:0003723 RNA binding; GO:0005515 protein binding; GO:0005488 binding; GO:0003676 nucleic acid binding;	K03260	EIF4G; translation initiation factor 4G	mdm03013 RNA transport - Malus domestica (apple);	IPR003890; IPR016024; IPR016021;	MIF4G-like, type 3; Armadillo-type fold; MIF4G-like domain;
RchiOBHm_Chr1g0349471	PREDICTED: coiled-coil domain-containing protein 115 isoform X2 [Fragaria vesca subsp. vesca]	0.236	Down	0.0045008	---	13.5	36.534	7	3	3	2	2	3	0	0	0	3	2	3	2	3	1	3	2	3	2	3	1	32286	44912	52328	10001	10351	0	1.077	1.498	1.746	0.334	0.345		nucleus
RchiOBHm_Chr1g0360711	Putative cytochrome b5-like heme/steroid binding domain-containing protein	1.691	Up	0.029641	---	72.6	15.093	26	7	7	3	4	4	5	5	5	7	7	7	7	7	7	7	7	7	7	7	7	590480	640580	445030	744550	1070900	1019200	0.785	0.852	0.592	0.99	1.424	1.356	cytoplasm			GO:0097159 organic cyclic compound binding; GO:1901363 heterocyclic compound binding; GO:0020037 heme binding; GO:0046906 tetrapyrrole binding; GO:0005488 binding;				IPR001199;	Cytochrome b5-like heme/steroid binding domain;
RchiOBHm_Chr1g0351641	Putative polygalacturonate 4-alpha-galacturonosyltransferase	0.652	Down	0.0110589	---	31.7	76.701	61	15	14	13	11	12	11	8	6	14	15	15	12	12	12	13	14	14	11	11	11	859260	776910	950690	648990	534800	503560	1.206	1.091	1.335	0.911	0.751	0.707	chloroplast			GO:0016757 transferase activity, transferring glycosyl groups; GO:0003824 catalytic activity; GO:0016740 transferase activity;	K13648	GAUT; alpha-1,4-galacturonosyltransferase [EC:2.4.1.43]	mdm00520 Amino sugar and nucleotide sugar metabolism - Malus domestica (apple); mdm01100 Metabolic pathways - Malus domestica (apple);	IPR029044;	Nucleotide-diphospho-sugar transferases;
RchiOBHm_Chr1g0361061	Putative NDP-glucose--starch glucosyltransferase	1.844	Up	0.0077967	---	27.4	66.227	24	10	7	3	2	4	5	5	5	9	8	10	8	9	9	6	5	7	6	6	6	176100	154920	192210	385340	268270	310860	0.71	0.625	0.775	1.554	1.082	1.254	chloroplast			GO:0016758 transferase activity, transferring hexosyl groups; GO:0003824 catalytic activity; GO:0035251 UDP-glucosyltransferase activity; GO:0008194 UDP-glycosyltransferase activity; GO:0046527 glucosyltransferase activity; GO:0004373 glycogen (starch) synthase activity; GO:0016757 transferase activity, transferring glycosyl groups; GO:0016740 transferase activity;	K13679	WAXY; granule-bound starch synthase [EC:2.4.1.242]	mdm00500 Starch and sucrose metabolism - Malus domestica (apple); mdm01100 Metabolic pathways - Malus domestica (apple); mdm01110 Biosynthesis of secondary metabolites - Malus domestica (apple);	IPR013534; IPR001296;	Starch synthase, catalytic domain; Glycosyl transferase, family 1;
RchiOBHm_Chr1g0353371	transmembrane protein [Arabidopsis thaliana]	0.541	Down	0.023164	---	61.2	9.558	21	4	2	3	3	3	5	4	3	3	3	4	4	4	4	2	2	2	2	2	2	518830	513990	617250	337910	347560	207010	1.224	1.213	1.457	0.797	0.82	0.489	mitochondria
RchiOBHm_Chr1g0353741	Putative glutathione-regulated potassium-efflux system protein KefB	0.643	Down	0.0057373	---	26.1	132.21	78	18	18	13	13	14	14	14	10	16	16	15	16	16	17	16	16	15	16	16	17	914990	999540	801260	634030	579970	532730	1.23	1.344	1.077	0.852	0.78	0.716	plasma membrane	GO:0006810 transport; GO:0006813 potassium ion transport; GO:0055085 transmembrane transport; GO:0006812 cation transport; GO:0006811 ion transport; GO:0030001 metal ion transport; GO:0051179 localization; GO:0015672 monovalent inorganic cation transport; GO:0051234 establishment of localization;	GO:0031224 intrinsic component of membrane; GO:0016020 membrane; GO:0016021 integral component of membrane; GO:0044425 membrane part;	GO:0015298 solute:cation antiporter activity; GO:0022804 active transmembrane transporter activity; GO:0015291 secondary active transmembrane transporter activity; GO:0015075 ion transmembrane transporter activity; GO:0015299 solute:proton antiporter activity; GO:0022892 substrate-specific transporter activity; GO:0015077 monovalent inorganic cation transmembrane transporter activity; GO:0022890 …				IPR004771; IPR006153; IPR016040; IPR003148;	K+/H+ exchanger; Cation/H+ exchanger; NAD(P)-binding domain; Regulator of K+ conductance, N-terminal;
RchiOBHm_Chr1g0355771	Putative major intrinsic protein	0.517	Down	0.00026365	---	40.1	30.859	25	8	6	4	5	6	4	5	1	7	7	8	8	8	8	6	6	6	6	6	6	534110	524590	574900	287370	300910	256870	1.293	1.27	1.392	0.696	0.728	0.622	plasma membrane	GO:0006810 transport; GO:0051179 localization; GO:0051234 establishment of localization;	GO:0016020 membrane;	GO:0005215 transporter activity;	K09872	PIP; aquaporin PIP		IPR023271;	Aquaporin-like;
RchiOBHm_Chr1g0361351	Putative inorganic diphosphatase	1.677	Up	0.0168009	---	39.8	24.205	12	7	3	2	2	2	1	2	3	6	5	6	6	7	7	2	2	2	2	3	3	51492	60094	42848	81914	75723	101540	0.747	0.872	0.622	1.188	1.098	1.473	cytoplasm	GO:0008152 metabolic process; GO:0044237 cellular metabolic process; GO:0006793 phosphorus metabolic process; GO:0009987 cellular process; GO:0006796 phosphate-containing compound metabolic process;	GO:0044424 intracellular part; GO:0005623 cell; GO:0044464 cell part; GO:0005622 intracellular; GO:0005737 cytoplasm;	GO:0000287 magnesium ion binding; GO:0004427 inorganic diphosphatase activity; GO:0016462 pyrophosphatase activity; GO:0003824 catalytic activity; GO:0005488 binding; GO:0043167 ion binding; GO:0046872 metal ion binding; GO:0043169 cation binding; GO:0016817 hydrolase activity, acting on acid anhydrides; GO:0016787 hydrolase activity; GO:0016818 hydrolase activity, acting on acid anhydrides, in p…	K01507	ppa; inorganic pyrophosphatase [EC:3.6.1.1]	mdm00190 Oxidative phosphorylation - Malus domestica (apple);
RchiOBHm_Chr1g0356151	Putative mesoderm development candidate 2	0.653	Down	0.00064191	---	30.5	24.51	22	5	4	5	5	4	3	2	3	5	5	5	4	5	3	4	4	4	3	4	2	261060	244210	230630	162100	166080	152500	1.288	1.204	1.137	0.799	0.819	0.752	endoplasmic reticulum
RchiOBHm_Chr1g0368001	Putative nepenthesin	3.905	Up	0.0096763	---	19.5	47.036	18	6	6	2	1	1	6	4	4	2	3	2	6	5	4	2	3	2	6	5	4	81392	41135	96986	372250	259850	225090	0.454	0.229	0.54	2.074	1.448	1.254	chloroplast	GO:0006508 proteolysis; GO:0008152 metabolic process; GO:0043170 macromolecule metabolic process; GO:0019538 protein metabolic process; GO:0044238 primary metabolic process; GO:0071704 organic substance metabolic process;		GO:0004175 endopeptidase activity; GO:0008233 peptidase activity; GO:0003824 catalytic activity; GO:0004190 aspartic-type endopeptidase activity; GO:0070011 peptidase activity, acting on L-amino acid peptides; GO:0016787 hydrolase activity; GO:0070001 aspartic-type peptidase activity;				IPR032799; IPR033121; IPR021109; IPR032861; IPR034161;	Xylanase inhibitor, C-terminal; Peptidase family A1 domain; Aspartic peptidase domain; Xylanase inhibitor, N-terminal; Pepsin-like domain, plant;
RchiOBHm_Chr1g0368091	Ribulose bisphosphate carboxylase/oxygenase activase	1.61	Up	0.048621	---	47.2	51.843	49	15	11	5	10	8	8	10	8	11	12	14	13	13	15	9	10	11	10	11	11	671490	675820	655630	1065300	1275800	883760	0.771	0.776	0.752	1.223	1.464	1.014	chloroplast			GO:0005524 ATP binding; GO:1901265 nucleoside phosphate binding; GO:0001882 nucleoside binding; GO:0043167 ion binding; GO:0000166 nucleotide binding; GO:0097159 organic cyclic compound binding; GO:1901363 heterocyclic compound binding; GO:0032549 ribonucleoside binding; GO:0097367 carbohydrate derivative binding; GO:0032553 ribonucleotide binding; GO:0005488 binding; GO:0032550 purine ribonucleo…				IPR003959; IPR027417;	ATPase, AAA-type, core; P-loop containing nucleoside triphosphate hydrolase;
RchiOBHm_Chr1g0357851	PREDICTED: reticulon-like protein B5 [Fragaria vesca subsp. vesca]	0.664	Down	0.030235	---	42.3	29.395	42	9	9	4	8	8	7	9	6	7	7	8	8	8	6	7	7	8	8	8	6	1380800	1329100	1119700	813130	1024500	704000	1.3	1.252	1.054	0.766	0.965	0.663	plasma membrane				K20721	RTN1; reticulon-1		IPR003388;	Reticulon;
RchiOBHm_Chr1g0359611	"Putative polyketide cyclase/dehydrase, START-like domain-containing protein"	0.169	Down	0.00063701	---	48	23.008	11	6	6	2	5	4	0	0	0	5	6	5	2	2	3	5	6	5	2	2	3	89854	111940	94536	20287	18389	11575	1.556	1.938	1.637	0.351	0.318	0.2	endoplasmic reticulum							IPR023393;	START-like domain;
RchiOBHm_Chr1g0360111	Putative transcription factor WD40-like family	0.568	Down	0.023561	---	2.9	281.52	13	5	5	3	3	3	2	1	1	4	5	5	5	4	4	4	5	5	5	4	4	108990	124360	111540	46583	79090	70129	1.209	1.38	1.238	0.517	0.878	0.778	plasma membrane			GO:0005515 protein binding; GO:0005488 binding;				IPR017986; IPR022033; IPR015943; IPR011047;	WD40-repeat-containing domain; RAVE complex protein Rav1 C-terminal; WD40/YVTN repeat-like-containing domain; Quinoprotein alcohol dehydrogenase-like superfamily;
RchiOBHm_Chr1g0361821	Putative phosphoesterase metallo-dependent phosphatase	0.522	Down	0.0100013	---	18.1	41.967	12	4	4	3	4	2	1	1	1	4	4	3	4	3	3	4	4	3	4	3	3	153420	131770	107110	60614	62638	81672	1.541	1.324	1.076	0.609	0.629	0.821	extracellular			GO:0016787 hydrolase activity; GO:0003824 catalytic activity;				IPR029052; IPR004843;	Metallo-dependent phosphatase-like; Calcineurin-like phosphoesterase domain, ApaH type;
RchiOBHm_Chr1g0369301	Putative sedoheptulose-bisphosphatase	1.588	Up	0.0062838	---	42.3	41.958	50	10	6	7	7	6	10	10	10	10	10	10	10	9	10	6	6	6	6	6	6	895980	777960	672090	1325000	1205200	1195700	0.885	0.769	0.664	1.309	1.191	1.182	chloroplast	GO:0008152 metabolic process; GO:0005975 carbohydrate metabolic process; GO:0044238 primary metabolic process; GO:0071704 organic substance metabolic process;		GO:0016787 hydrolase activity; GO:0042578 phosphoric ester hydrolase activity; GO:0003824 catalytic activity; GO:0016791 phosphatase activity; GO:0016788 hydrolase activity, acting on ester bonds;	K01100	E3.1.3.37; sedoheptulose-bisphosphatase [EC:3.1.3.37]	mdm00710 Carbon fixation in photosynthetic organisms - Malus domestica (apple); mdm01100 Metabolic pathways - Malus domestica (apple); mdm01200 Carbon metabolism - Malus domestica (apple);	IPR033391;	Fructose-1-6-bisphosphatase class I, N-terminal;
RchiOBHm_Chr1g0363881	Putative Taxilin family	0.526	Down	0.0030422	---	12.4	52.948	14	4	4	2	3	2	2	2	3	4	4	4	4	4	4	4	4	4	4	4	4	105980	100380	105390	44837	63163	55967	1.337	1.266	1.329	0.566	0.797	0.706	nucleus			GO:0000149 SNARE binding; GO:0005515 protein binding; GO:0019905 syntaxin binding; GO:0005488 binding;
RchiOBHm_Chr1g0364181	Putative non-specific serine/threonine protein kinase	0.463	Down	0.0092645	---	11.6	130.57	26	9	9	7	7	5	2	2	3	8	8	7	4	4	7	8	8	7	4	4	7	111780	111420	134730	43464	72995	49209	1.281	1.277	1.544	0.498	0.836	0.564	nucleus							IPR000313;	PWWP domain;
RchiOBHm_Chr1g0364631	Putative Rab-GTPase-TBC domain-containing protein	0.394	Down	8.322e-05	---	27.4	95.437	62	19	19	16	17	15	8	3	3	19	17	18	13	11	10	19	17	18	13	11	10	614910	611200	540680	218560	228460	250000	1.497	1.488	1.317	0.532	0.556	0.609	chloroplast							IPR000195;	Rab-GTPase-TBC domain;
RchiOBHm_Chr1g0371291	neuronal PAS domain protein [Arabidopsis thaliana]	2.049	Up	0.00195601	---	10.4	56.498	14	3	3	2	2	1	3	4	2	2	3	3	3	3	3	2	3	3	3	3	3	36056	41445	33213	84628	65457	76829	0.641	0.737	0.59	1.504	1.163	1.365	chloroplast
RchiOBHm_Chr1g0372631	Putative carboxylesterase	1.882	Up	0.00028351	---	26.1	31.558	31	5	5	5	5	3	5	7	6	4	5	4	4	5	4	4	5	4	4	5	4	402730	435230	366690	745870	786490	735780	0.696	0.752	0.634	1.289	1.359	1.271	cytoplasm							IPR029058; IPR000073;	Alpha/Beta hydrolase fold; Alpha/beta hydrolase fold-1;
RchiOBHm_Chr1g0364651	Putative S-crystallin	0.62	Down	0.0034372	---	26.7	34.928	21	6	4	4	4	3	3	4	3	6	6	5	6	6	6	4	4	3	4	4	4	106790	109550	90093	64564	57845	67565	1.291	1.324	1.089	0.78	0.699	0.817	chloroplast			GO:0005515 protein binding; GO:0005488 binding;	K00799	GST, gst; glutathione S-transferase [EC:2.5.1.18]	mdm00480 Glutathione metabolism - Malus domestica (apple); mdm01100 Metabolic pathways - Malus domestica (apple);	IPR010987; IPR012336; IPR004045;	Glutathione S-transferase, C-terminal-like; Thioredoxin-like fold; Glutathione S-transferase, N-terminal;
RchiOBHm_Chr1g0367031	Putative oxidoreductase	0.44	Down	0.0070588	---	15.8	35.906	22	4	4	5	4	3	4	3	3	4	3	4	4	4	3	4	3	4	4	4	3	257100	195100	167980	95416	103540	74117	1.727	1.31	1.128	0.641	0.695	0.498	cytoplasm	GO:0044699 single-organism process; GO:0008152 metabolic process; GO:0044238 primary metabolic process; GO:0044710 single-organism metabolic process; GO:0006629 lipid metabolic process; GO:0071704 organic substance metabolic process;	GO:0016020 membrane; GO:0044464 cell part; GO:0005622 intracellular; GO:0044425 membrane part; GO:0005737 cytoplasm; GO:0031224 intrinsic component of membrane; GO:0044424 intracellular part; GO:0005623 cell; GO:0016021 integral component of membrane;	GO:0016627 oxidoreductase activity, acting on the CH-CH group of donors; GO:0005515 protein binding; GO:0003824 catalytic activity; GO:0005488 binding; GO:0016491 oxidoreductase activity;	K10258	TER, TSC13, CER10; very-long-chain enoyl-CoA reductase [EC:1.3.1.93]	mdm00062 Fatty acid elongation - Malus domestica (apple); mdm01040 Biosynthesis of unsaturated fatty acids - Malus domestica (apple); mdm01100 Metabolic pathways - Malus domestica (apple); mdm01110 Biosynthesis of secondary metabolites - Malus domestica (apple); mdm01212 Fatty acid metabolism - Malus domestica (apple);	IPR001104; IPR029071; IPR000626;	3-oxo-5-alpha-steroid 4-dehydrogenase, C-terminal; Ubiquitin-related domain; Ubiquitin domain;
RchiOBHm_Chr1g0368531	Putative mitochondrial glycoprotein	0.529	Down	0.0174983	---	21.1	28.317	12	4	4	1	3	2	2	3	1	3	3	3	3	4	2	3	3	3	3	4	2	407650	510340	458140	229530	314350	183880	1.163	1.455	1.307	0.655	0.896	0.524	chloroplast		GO:0005759 mitochondrial matrix; GO:0043229 intracellular organelle; GO:0044429 mitochondrial part; GO:0005737 cytoplasm; GO:0044446 intracellular organelle part; GO:0044424 intracellular part; GO:0005623 cell; GO:0005739 mitochondrion; GO:0044422 organelle part; GO:0031974 membrane-enclosed lumen; GO:0043226 organelle; GO:0043231 intracellular membrane-bounded organelle; GO:0070013 intracellular…		K15414	C1QBP; complement component 1 Q subcomponent-binding protein, mitochondrial
RchiOBHm_Chr1g0368611	"Putative xylogalacturonan beta-1,3-xylosyltransferase"	0.581	Down	0.0068351	---	30.7	39.619	39	6	6	6	9	6	7	6	5	4	6	4	5	5	4	4	6	4	5	5	4	432400	344200	404890	236360	255910	194110	1.389	1.106	1.301	0.759	0.822	0.624	chloroplast
RchiOBHm_Chr1g0369551	Putative hexosyltransferase	0.617	Down	0.0032978	---	20.1	37.073	19	5	5	3	3	3	4	3	3	5	5	5	5	5	5	5	5	5	5	5	5	199650	204980	193190	105270	129710	134060	1.239	1.272	1.199	0.653	0.805	0.832	chloroplast	GO:0030201 heparan sulfate proteoglycan metabolic process; GO:0006024 glycosaminoglycan biosynthetic process; GO:0044699 single-organism process; GO:0009058 biosynthetic process; GO:1901566 organonitrogen compound biosynthetic process; GO:0044237 cellular metabolic process; GO:0044272 sulfur compound biosynthetic process; GO:0030203 glycosaminoglycan metabolic process; GO:0071704 organic substanc…	GO:0031224 intrinsic component of membrane; GO:0016020 membrane; GO:0016021 integral component of membrane; GO:0044425 membrane part;		K02367	EXT2; glucuronyl/N-acetylglucosaminyl transferase EXT2 [EC:2.4.1.224 2.4.1.225]	mdm01100 Metabolic pathways - Malus domestica (apple);	IPR029044; IPR015338;	Nucleotide-diphospho-sugar transferases; Exostosin , C-terminal;
RchiOBHm_Chr1g0374671	Putative pectinesterase	2.414	Up	0.030843	---	27.6	21.741	14	4	3	2	2	1	3	2	4	4	4	4	4	4	4	3	3	3	3	3	3	413700	238430	305620	558280	642120	1110700	0.759	0.438	0.561	1.025	1.179	2.039	extracellular			GO:0004857 enzyme inhibitor activity; GO:0098772 molecular function regulator; GO:0030234 enzyme regulator activity;				IPR006501;	Pectinesterase inhibitor domain;
RchiOBHm_Chr1g0370001	PREDICTED: protein yippee-like isoform X1 [Fragaria vesca subsp. vesca]	0.512	Down	0.0068807	---	38	14.244	9	3	3	2	2	2	1	1	1	2	3	3	3	3	2	2	3	3	3	3	2	137910	131130	117280	71645	50824	75472	1.416	1.347	1.204	0.736	0.522	0.775	cytoplasm
RchiOBHm_Chr1g0370391	Putative anthocyanidin synthase	0.518	Down	0.0094844	---	34.2	40.471	30	9	9	6	6	5	5	3	5	8	8	7	8	8	8	8	8	7	8	8	8	296410	219720	315770	148590	121600	161100	1.408	1.044	1.5	0.706	0.578	0.765	cytoplasm	GO:0044699 single-organism process; GO:0008152 metabolic process; GO:0055114 oxidation-reduction process; GO:0044710 single-organism metabolic process;		GO:0003824 catalytic activity; GO:0016491 oxidoreductase activity;				IPR027443; IPR005123; IPR026992;	Isopenicillin N synthase-like; Oxoglutarate/iron-dependent dioxygenase; Non-haem dioxygenase N-terminal domain;
RchiOBHm_Chr1g0374921	Putative phosphate-induced protein	1.509	Up	0.0044634	---	16.6	37.15	49	5	5	7	6	8	9	9	10	4	4	4	5	5	5	4	4	4	5	5	5	1004500	974590	1101100	1515800	1729200	1405300	0.78	0.756	0.855	1.176	1.342	1.091	chloroplast
RchiOBHm_Chr1g0370931	Putative phosphoric monoester hydrolase	0.521	Down	0.0017159	---	25.9	55.691	39	9	9	9	8	10	4	4	4	8	9	8	7	9	8	8	9	8	7	9	8	501870	414170	450070	214550	229070	268990	1.449	1.195	1.299	0.619	0.661	0.776	cytoplasm			GO:0016787 hydrolase activity; GO:0003993 acid phosphatase activity; GO:0003824 catalytic activity; GO:0042578 phosphoric ester hydrolase activity; GO:0016791 phosphatase activity; GO:0016788 hydrolase activity, acting on ester bonds;	K03103	MINPP1; multiple inositol-polyphosphate phosphatase / 2,3-bisphosphoglycerate 3-phosphatase [EC:3.1.3.62 3.1.3.80]	mdm00010 Glycolysis / Gluconeogenesis - Malus domestica (apple); mdm00562 Inositol phosphate metabolism - Malus domestica (apple); mdm01100 Metabolic pathways - Malus domestica (apple);
RchiOBHm_Chr1g0372341	PREDICTED: aminoacyl tRNA synthase complex-interacting multifunctional protein 1 [Fragaria vesca subsp.vesca]	0.571	Down	0.0080234	---	39.5	37.392	42	10	10	9	8	8	6	5	6	9	9	8	10	9	10	9	9	8	10	9	10	721410	665630	684160	458590	412230	312400	1.33	1.227	1.261	0.845	0.76	0.576	nucleus			GO:0097159 organic cyclic compound binding; GO:1901363 heterocyclic compound binding; GO:0003723 RNA binding; GO:0000049 tRNA binding; GO:0005488 binding; GO:0003676 nucleic acid binding;	K15437	AIMP1, ARC1; aminoacyl tRNA synthase complex-interacting multifunctional protein 1		IPR012340; IPR010987; IPR002547;	Nucleic acid-binding, OB-fold; Glutathione S-transferase, C-terminal-like; tRNA-binding domain;
RchiOBHm_Chr1g0372681	import inner membrane translocase subunit [Arabidopsis thaliana]	0.471	Down	0.0063039	---	38.6	37.658	26	10	10	7	4	7	3	3	2	10	10	8	8	8	8	10	10	8	8	8	8	630850	571030	587970	289820	343560	210260	1.437	1.301	1.34	0.66	0.783	0.479	chloroplast
RchiOBHm_Chr1g0375831	"Putative abieta-7,13-dien-18-ol hydroxylase"	7.355	Up	2.0869e-05	---	34.5	57.355	34	11	8	3	1	1	9	10	10	5	7	5	10	10	9	5	6	3	7	7	7	87859	76134	72622	571260	649460	518920	0.267	0.231	0.22	1.734	1.972	1.575	chloroplast	GO:0044699 single-organism process; GO:0008152 metabolic process; GO:0055114 oxidation-reduction process; GO:0044710 single-organism metabolic process;		GO:0097159 organic cyclic compound binding; GO:1901363 heterocyclic compound binding; GO:0020037 heme binding; GO:0005506 iron ion binding; GO:0046914 transition metal ion binding; GO:0003824 catalytic activity; GO:0005488 binding; GO:0043167 ion binding; GO:0043169 cation binding; GO:0046872 metal ion binding; GO:0016705 oxidoreductase activity, acting on paired donors, with incorporation or red…
RchiOBHm_Chr1g0373331	"PREDICTED: leucine--tRNA ligase, cytoplasmic [Prunus mume]"	0.601	Down	0.0015229	---	51.1	122.95	196	37	12	40	32	37	30	33	24	37	33	36	34	35	32	12	10	11	10	10	9	4629800	4110500	4295400	2851300	2638200	2349000	1.331	1.182	1.235	0.82	0.758	0.675	cytoplasm	GO:0006518 peptide metabolic process; GO:0006725 cellular aromatic compound metabolic process; GO:0044267 cellular protein metabolic process; GO:0044699 single-organism process; GO:0009058 biosynthetic process; GO:1901566 organonitrogen compound biosynthetic process; GO:0043039 tRNA aminoacylation; GO:0044237 cellular metabolic process; GO:0071704 organic substance metabolic process; GO:0008152 m…	GO:0044424 intracellular part; GO:0005623 cell; GO:0044464 cell part; GO:0005622 intracellular; GO:0005737 cytoplasm;	GO:0016876 ligase activity, forming aminoacyl-tRNA and related compounds; GO:0002161 aminoacyl-tRNA editing activity; GO:0005524 ATP binding; GO:0052689 carboxylic ester hydrolase activity; GO:1901265 nucleoside phosphate binding; GO:0016875 ligase activity, forming carbon-oxygen bonds; GO:0001882 nucleoside binding; GO:0043167 ion binding; GO:0016874 ligase activity; GO:0016787 hydrolase activit…	K01869	LARS, leuS; leucyl-tRNA synthetase [EC:6.1.1.4]	mdm00970 Aminoacyl-tRNA biosynthesis - Malus domestica (apple);	IPR014729; IPR009008; IPR013155; IPR002300; IPR009080;	Rossmann-like alpha/beta/alpha sandwich fold; Valyl/Leucyl/Isoleucyl-tRNA synthetase, editing domain; Methionyl/Valyl/Leucyl/Isoleucyl-tRNA synthetase, anticodon-binding; Aminoacyl-tRNA synthetase, class Ia; Aminoacyl-tRNA synthetase, class Ia, anticodon-binding;
RchiOBHm_Chr1g0374511	"Acid beta-fructofuranosidase 1, vacuolar"	0.629	Down	0.020203	---	20.6	71.773	37	9	8	6	7	6	6	8	4	9	9	9	8	9	7	8	8	8	7	8	6	5890600	4883800	4389900	3588000	3297500	2656200	1.431	1.186	1.066	0.871	0.801	0.645	cytoplasm	GO:0008152 metabolic process; GO:0005975 carbohydrate metabolic process; GO:0044238 primary metabolic process; GO:0071704 organic substance metabolic process;		GO:0004575 sucrose alpha-glucosidase activity; GO:0090599 alpha-glucosidase activity; GO:0003824 catalytic activity; GO:0016798 hydrolase activity, acting on glycosyl bonds; GO:0015926 glucosidase activity; GO:0004553 hydrolase activity, hydrolyzing O-glycosyl compounds; GO:0016787 hydrolase activity; GO:0004564 beta-fructofuranosidase activity;	K01193	INV, sacA; beta-fructofuranosidase [EC:3.2.1.26]	mdm00052 Galactose metabolism - Malus domestica (apple); mdm00500 Starch and sucrose metabolism - Malus domestica (apple); mdm01100 Metabolic pathways - Malus domestica (apple);	IPR021792; IPR013148; IPR023296; IPR013189; IPR013320;	Beta-fructofuranosidase; Glycosyl hydrolase family 32, N-terminal; Glycosyl hydrolase, five-bladed beta-propellor domain; Glycosyl hydrolase family 32, C-terminal; Concanavalin A-like lectin/glucanase domain;
RchiOBHm_Chr1g0374721	Putative pectinesterase	0.329	Down	0.0081618	---	36.1	25.129	35	6	6	7	7	7	4	5	5	6	6	6	5	6	5	6	6	6	5	6	5	2897800	2978800	1891000	991820	979550	580630	1.685	1.732	1.099	0.577	0.57	0.338	chloroplast			GO:0004857 enzyme inhibitor activity; GO:0098772 molecular function regulator; GO:0030234 enzyme regulator activity;				IPR006501;	Pectinesterase inhibitor domain;
RchiOBHm_Chr1g0379721	Putative glycosidase	5.141	Up	0.041603	---	12.8	32.397	10	2	2	1	1	1	1	3	3	2	1	2	2	2	2	2	1	2	2	2	2	44515	0	37495	102040	332590	197810	0.312		0.262	0.714	2.328	1.384	extracellular	GO:0008152 metabolic process; GO:0005975 carbohydrate metabolic process; GO:0044238 primary metabolic process; GO:0071704 organic substance metabolic process;		GO:0004553 hydrolase activity, hydrolyzing O-glycosyl compounds; GO:0016787 hydrolase activity; GO:0003824 catalytic activity; GO:0016798 hydrolase activity, acting on glycosyl bonds;	K01183	E3.2.1.14; chitinase [EC:3.2.1.14]	mdm00520 Amino sugar and nucleotide sugar metabolism - Malus domestica (apple); mdm01100 Metabolic pathways - Malus domestica (apple);	IPR001223; IPR017853; IPR013781;	Glycoside hydrolase family 18, catalytic domain; Glycoside hydrolase superfamily; Glycoside hydrolase, catalytic domain;
RchiOBHm_Chr1g0377381	Putative protein xylosyltransferase	0.627	Down	0.0065372	---	7.3	61.453	6	3	3	2	2	1	0	1	0	3	2	2	2	3	3	3	2	2	2	3	3	59301	57954	48546	38982	33536	31350	1.319	1.289	1.08	0.867	0.746	0.698	nucleus
RchiOBHm_Chr1g0383771	"Putative PDZ domain, rubredoxin-type"	1.981	Up	0.0103982	---	18.4	29.006	5	2	2	1	1	0	2	1	0	2	2	2	2	2	2	2	2	2	2	2	2	28995	32755	30136	70888	66165	44970	0.635	0.718	0.66	1.553	1.449	0.985	chloroplast			GO:0043169 cation binding; GO:0046872 metal ion binding; GO:0005515 protein binding; GO:0005506 iron ion binding; GO:0046914 transition metal ion binding; GO:0005488 binding; GO:0043167 ion binding;				IPR024934; IPR004039; IPR001478;	Rubredoxin-like domain; Rubredoxin-type fold; PDZ domain;
RchiOBHm_Chr1g0377941	Putative quinate O-hydroxycinnamoyltransferase	0.506	Down	0.0022235	---	37.4	49.036	64	13	13	14	13	14	9	5	9	13	12	13	12	9	11	13	12	13	12	9	11	1534400	1438200	1585500	908370	656470	739860	1.341	1.257	1.386	0.794	0.574	0.647	cytoplasm			GO:0016746 transferase activity, transferring acyl groups; GO:0016747 transferase activity, transferring acyl groups other than amino-acyl groups; GO:0003824 catalytic activity; GO:0016740 transferase activity;	K19747	DCR; BAHD acyltransferase [EC:2.3.1.-]		IPR023213;	Chloramphenicol acetyltransferase-like domain;
RchiOBHm_Chr1g0384031	Putative laccase	4.128	Up	0.0166619	---	19.5	64.048	26	9	8	1	0	0	10	8	7	6	5	3	9	9	9	6	5	3	8	8	8	103670	250220	225980	1162000	704130	527430	0.209	0.505	0.456	2.345	1.421	1.064	vacuolar membrane	GO:0006725 cellular aromatic compound metabolic process; GO:0055114 oxidation-reduction process; GO:0044712 single-organism catabolic process; GO:0044763 single-organism cellular process; GO:1901360 organic cyclic compound metabolic process; GO:0044699 single-organism process; GO:0044237 cellular metabolic process; GO:0009698 phenylpropanoid metabolic process; GO:0071704 organic substance metabol…	GO:0048046 apoplast; GO:0005576 extracellular region;	GO:0016682 oxidoreductase activity, acting on diphenols and related substances as donors, oxygen as acceptor; GO:0046914 transition metal ion binding; GO:0016679 oxidoreductase activity, acting on diphenols and related substances as donors; GO:0003824 catalytic activity; GO:0005488 binding; GO:0043167 ion binding; GO:0046872 metal ion binding; GO:0043169 cation binding; GO:0052716 hydroquinone:ox…	K05909	E1.10.3.2; laccase [EC:1.10.3.2]		IPR034289; IPR011707; IPR008972; IPR011706; IPR034285; IPR034288; IPR001117;	Laccase, third cupredoxin domain; Multicopper oxidase, type 3; Cupredoxin; Multicopper oxidase, type 2; Laccase, second cupredoxin domain; Laccase, first cupredoxin domain; Multicopper oxidase, type 1;
RchiOBHm_Chr1g0378941	"Anthocyanidin 5,3-O-glucosyltransferase"	0.663	Down	0.00077797	---	46.3	51.959	82	14	14	14	15	14	13	13	13	11	12	12	11	12	11	11	12	12	11	12	11	1972500	2039200	1829900	1356800	1219300	1296500	1.218	1.26	1.13	0.838	0.753	0.801	cytoplasm	GO:0008152 metabolic process;		GO:0016757 transferase activity, transferring glycosyl groups; GO:0016758 transferase activity, transferring hexosyl groups; GO:0003824 catalytic activity; GO:0016740 transferase activity;
RchiOBHm_Chr1g0379531	Putative P-loop containing nucleoside triphosphate hydrolase	0.651	Down	0.027815	---	11.5	38.748	5	3	3	2	1	2	0	0	0	3	2	2	2	2	2	3	2	2	2	2	2	55620	59423	81004	42214	39596	45868	1.031	1.101	1.501	0.782	0.734	0.85	chloroplast							IPR027417;	P-loop containing nucleoside triphosphate hydrolase;
RchiOBHm_Chr1g0380871	Putative HSP20-like chaperone	0.562	Down	0.00095882	---	28.1	35.747	30	6	6	7	5	6	4	4	4	6	6	6	6	6	6	6	6	6	6	6	6	1398200	1231000	1482600	796980	800350	715510	1.306	1.15	1.385	0.744	0.747	0.668	nucleus							IPR007052; IPR008978;	CS domain; HSP20-like chaperone;
RchiOBHm_Chr2g0085181	Putative carboxypeptidase D	1.614	Up	0.02172	---	15.5	52.571	30	5	5	5	5	3	7	5	5	3	4	5	4	5	4	3	4	5	4	5	4	511320	331530	400220	605650	687120	712900	0.944	0.612	0.739	1.119	1.269	1.317	vacuolar membrane	GO:0006508 proteolysis; GO:0008152 metabolic process; GO:0043170 macromolecule metabolic process; GO:0019538 protein metabolic process; GO:0044238 primary metabolic process; GO:0071704 organic substance metabolic process;		GO:0004180 carboxypeptidase activity; GO:0008233 peptidase activity; GO:0008238 exopeptidase activity; GO:0003824 catalytic activity; GO:0017171 serine hydrolase activity; GO:0008236 serine-type peptidase activity; GO:0070011 peptidase activity, acting on L-amino acid peptides; GO:0016787 hydrolase activity; GO:0004185 serine-type carboxypeptidase activity; GO:0070008 serine-type exopeptidase act…	K16297	SCPL-II; serine carboxypeptidase-like clade II [EC:3.4.16.-]		IPR029058;	Alpha/Beta hydrolase fold;
RchiOBHm_Chr2g0086411	Putative DNA helicase	2.091	Up	0.00094414	---	27.5	81.466	44	13	13	4	4	6	10	9	11	11	9	12	12	12	12	11	9	12	12	12	12	170670	191890	180430	328190	379370	428150	0.61	0.686	0.645	1.173	1.356	1.53	cytoplasm	GO:0006260 DNA replication; GO:0006725 cellular aromatic compound metabolic process; GO:0006259 DNA metabolic process; GO:1901360 organic cyclic compound metabolic process; GO:0006807 nitrogen compound metabolic process; GO:0009058 biosynthetic process; GO:0044238 primary metabolic process; GO:1901576 organic substance biosynthetic process; GO:0044237 cellular metabolic process; GO:0044249 cellul…	GO:0043226 organelle; GO:0043231 intracellular membrane-bounded organelle; GO:0043229 intracellular organelle; GO:0005634 nucleus; GO:0044464 cell part; GO:0005622 intracellular; GO:0032991 macromolecular complex; GO:0044424 intracellular part; GO:0042555 MCM complex; GO:0043234 protein complex; GO:0043227 membrane-bounded organelle; GO:0005623 cell;	GO:1901265 nucleoside phosphate binding; GO:0003690 double-stranded DNA binding; GO:0016817 hydrolase activity, acting on acid anhydrides; GO:0016787 hydrolase activity; GO:0003682 chromatin binding; GO:1901363 heterocyclic compound binding; GO:0097159 organic cyclic compound binding; GO:0016462 pyrophosphatase activity; GO:0003824 catalytic activity; GO:0032553 ribonucleotide binding; GO:0005488…	K02209	MCM5, CDC46; DNA replication licensing factor MCM5 [EC:3.6.4.12]	mdm03030 DNA replication - Malus domestica (apple);	IPR012340; IPR001208; IPR027417; IPR033762; IPR027925;	Nucleic acid-binding, OB-fold; MCM domain; P-loop containing nucleoside triphosphate hydrolase; MCM OB domain; MCM N-terminal domain;
RchiOBHm_Chr2g0089261	Putative methyltransferase	1.775	Up	0.0031648	---	57.1	43.119	64	16	16	9	10	7	12	11	15	12	13	13	14	13	15	12	13	13	14	13	15	306930	263600	238340	479240	434140	522720	0.82	0.705	0.637	1.281	1.16	1.397	cytoplasm	GO:0044267 cellular protein metabolic process; GO:0044238 primary metabolic process; GO:0044237 cellular metabolic process; GO:0032259 methylation; GO:0071704 organic substance metabolic process; GO:0008152 metabolic process; GO:0008213 protein alkylation; GO:0006479 protein methylation; GO:0043414 macromolecule methylation; GO:0044260 cellular macromolecule metabolic process; GO:0006464 cellular…		GO:0016741 transferase activity, transferring one-carbon groups; GO:0008168 methyltransferase activity; GO:0003824 catalytic activity; GO:0016740 transferase activity;	K11434	PRMT1; type I protein arginine methyltransferase [EC:2.1.1.319]		IPR029063;	S-adenosyl-L-methionine-dependent methyltransferase;
RchiOBHm_Chr1g0383371	Putative TATA-binding protein interacting (TIP20)	0.634	Down	3.5775e-05	---	43.9	134.54	162	35	33	31	29	33	25	21	23	32	33	31	30	31	28	32	31	30	29	29	27	2838000	2732700	2937200	1819800	1791400	1782500	1.225	1.179	1.268	0.785	0.773	0.769	plasma membrane			GO:0005488 binding;	K17263	CAND1; cullin-associated NEDD8-dissociated protein 1		IPR011989; IPR016024; IPR013932;	Armadillo-like helical; Armadillo-type fold; TATA-binding protein interacting (TIP20);
RchiOBHm_Chr2g0091051	"Putative non-heme dioxygenase domain, isopenicillin N synthase"	2.027	Up	6.4184e-05	---	39.6	40.329	26	8	7	4	3	3	6	5	5	6	5	5	7	8	8	6	5	5	7	7	7	128680	125970	116230	245060	242300	264190	0.688	0.673	0.621	1.31	1.295	1.412	chloroplast							IPR027443; IPR026992;	Isopenicillin N synthase-like; Non-haem dioxygenase N-terminal domain;
RchiOBHm_Chr1g0384261	"Putative 1,4-beta-D-xylan synthase transcription factor C2H2 family"	0.327	Down	0.011256	---	12.4	129.75	27	9	7	6	6	8	3	3	1	8	6	9	6	6	4	6	5	7	5	5	4	207210	196740	203320	82754	59505	56260	1.543	1.465	1.514	0.616	0.443	0.419	plasma membrane	GO:0016051 carbohydrate biosynthetic process; GO:0044711 single-organism biosynthetic process; GO:0006073 cellular glucan metabolic process; GO:0000271 polysaccharide biosynthetic process; GO:0030243 cellulose metabolic process; GO:0044042 glucan metabolic process; GO:0044763 single-organism cellular process; GO:0044699 single-organism process; GO:0033692 cellular polysaccharide biosynthetic proc…	GO:0016020 membrane;	GO:0016759 cellulose synthase activity; GO:0016758 transferase activity, transferring hexosyl groups; GO:0003824 catalytic activity; GO:0035251 UDP-glucosyltransferase activity; GO:0016760 cellulose synthase (UDP-forming) activity; GO:0008194 UDP-glycosyltransferase activity; GO:0046527 glucosyltransferase activity; GO:0016757 transferase activity, transferring glycosyl groups; GO:0016740 transfe…	K20924	CSLD; cellulose synthase-like protein [EC:2.4.1.-]		IPR013083;	Zinc finger, RING/FYVE/PHD-type;
RchiOBHm_Chr2g0084381	"Putative Late embryogenesis abundant protein, LEA-14"	0.323	Down	0.000160296	---	63.7	35.774	187	22	22	35	40	35	25	28	24	21	21	22	20	21	20	21	21	22	20	21	20	13056000	12406000	12325000	4422600	4348900	3447000	1.567	1.489	1.479	0.531	0.522	0.414	cytoplasm	GO:0009414 response to water deprivation; GO:0001101 response to acid chemical; GO:0042221 response to chemical; GO:0006950 response to stress; GO:0009415 response to water; GO:0009628 response to abiotic stimulus; GO:1901700 response to oxygen-containing compound; GO:0010035 response to inorganic substance; GO:0050896 response to stimulus; GO:0009269 response to desiccation;						IPR013783; IPR013990; IPR004864;	Immunoglobulin-like fold; Water stress and hypersensitive response domain; Late embryogenesis abundant protein, LEA-14;
RchiOBHm_Chr2g0084791	Putative protein kinase TKL-Pl-5 family	0.539	Down	0.036295	---	13.9	53.728	11	3	3	2	3	2	0	2	2	3	3	2	2	2	3	3	3	2	2	2	3	54750	59334	48035	28281	39497	19620	1.317	1.427	1.155	0.68	0.95	0.472	mitochondria	GO:0016310 phosphorylation; GO:0044267 cellular protein metabolic process; GO:0044238 primary metabolic process; GO:0044237 cellular metabolic process; GO:0006796 phosphate-containing compound metabolic process; GO:0071704 organic substance metabolic process; GO:0008152 metabolic process; GO:0006468 protein phosphorylation; GO:0006793 phosphorus metabolic process; GO:0044260 cellular macromolecul…		GO:0005524 ATP binding; GO:1901265 nucleoside phosphate binding; GO:0016773 phosphotransferase activity, alcohol group as acceptor; GO:0001882 nucleoside binding; GO:0043167 ion binding; GO:0005515 protein binding; GO:0004672 protein kinase activity; GO:0000166 nucleotide binding; GO:0097159 organic cyclic compound binding; GO:1901363 heterocyclic compound binding; GO:0032549 ribonucleoside bindi…				IPR000719; IPR020683; IPR001245; IPR011009;	Protein kinase domain; Ankyrin repeat-containing domain; Serine-threonine/tyrosine-protein kinase catalytic domain; Protein kinase-like domain;
RchiOBHm_Chr2g0084901	Putative UDP-glucuronosyl/UDP-glucosyltransferase	0.211	Down	0.0021643	---	13.7	57.681	11	5	5	2	2	5	1	0	1	4	4	5	3	1	3	4	4	5	3	1	3	88351	90292	99948	15671	0	23506	1.39	1.421	1.573	0.247		0.37	nucleus	GO:0008152 metabolic process;		GO:0016757 transferase activity, transferring glycosyl groups; GO:0016758 transferase activity, transferring hexosyl groups; GO:0003824 catalytic activity; GO:0016740 transferase activity;
RchiOBHm_Chr2g0091421	"Putative major facilitator, sugar transporter, major facilitator superfamily"	1.806	Up	0.047224	---	5.6	56.517	7	2	2	1	1	1	2	2	0	2	2	2	2	2	2	2	2	2	2	2	2	38832	49817	49275	65067	115220	69014	0.602	0.772	0.764	1.008	1.785	1.069	plasma membrane	GO:0006810 transport; GO:0055085 transmembrane transport; GO:0051179 localization; GO:0051234 establishment of localization;	GO:0031224 intrinsic component of membrane; GO:0016020 membrane; GO:0016021 integral component of membrane; GO:0044425 membrane part;	GO:0022892 substrate-specific transporter activity; GO:0022891 substrate-specific transmembrane transporter activity; GO:0022857 transmembrane transporter activity; GO:0005215 transporter activity;				IPR020846;	Major facilitator superfamily domain;
RchiOBHm_Chr2g0091641	"Putative polyketide cyclase/dehydrase, START-like domain-containing protein"	3.469	Up	0.025185	---	17.4	39.494	14	3	3	1	1	0	4	4	4	2	2	1	3	3	3	2	2	1	3	3	3	19665	22232	0	55103	107080	55859	0.378	0.428		1.06	2.06	1.074	cytoplasm							IPR023393;	START-like domain;
RchiOBHm_Chr2g0085721	"Putative translation elongation factor IF5A, translation elongation factor P"	0.466	Down	0.025618	---	65.6	17.502	32	9	6	7	9	3	4	4	5	9	9	6	7	7	6	6	6	4	4	5	4	1399700	1936900	1653400	647960	1118800	559330	1.148	1.588	1.356	0.531	0.918	0.459	cytoplasm	GO:0032270 positive regulation of cellular protein metabolic process; GO:0006518 peptide metabolic process; GO:0010608 posttranscriptional regulation of gene expression; GO:0043243 positive regulation of protein complex disassembly; GO:0006449 regulation of translational termination; GO:0009891 positive regulation of biosynthetic process; GO:0009058 biosynthetic process; GO:0044237 cellular metab…		GO:0097159 organic cyclic compound binding; GO:1901363 heterocyclic compound binding; GO:0043022 ribosome binding; GO:0008135 translation factor activity, RNA binding; GO:0003723 RNA binding; GO:0003746 translation elongation factor activity; GO:0005488 binding; GO:0003676 nucleic acid binding; GO:0044877 macromolecular complex binding; GO:0043021 ribonucleoprotein complex binding;	K03263	EIF5A; translation initiation factor 5A		IPR008991; IPR012340; IPR014722; IPR020189;	Translation protein SH3-like domain; Nucleic acid-binding, OB-fold; Ribosomal protein L2 domain 2; Translation elongation factor, IF5A C-terminal;
RchiOBHm_Chr2g0093131	Putative cytidine deaminase	3.155	Up	0.0027007	---	37.5	31.781	26	6	6	4	4	3	6	4	5	4	6	6	6	5	6	4	6	6	6	5	6	335720	487270	353300	1181000	1539700	990950	0.412	0.598	0.434	1.45	1.89	1.216	cytoplasm	GO:0009116 nucleoside metabolic process; GO:0046135 pyrimidine nucleoside catabolic process; GO:0006725 cellular aromatic compound metabolic process; GO:0044699 single-organism process; GO:0044237 cellular metabolic process; GO:0071704 organic substance metabolic process; GO:0044270 cellular nitrogen compound catabolic process; GO:0042454 ribonucleoside catabolic process; GO:0008152 metabolic pro…		GO:0016814 hydrolase activity, acting on carbon-nitrogen (but not peptide) bonds, in cyclic amidines; GO:0004126 cytidine deaminase activity; GO:0046914 transition metal ion binding; GO:0003824 catalytic activity; GO:0005488 binding; GO:0043167 ion binding; GO:0043169 cation binding; GO:0019239 deaminase activity; GO:0046872 metal ion binding; GO:0016787 hydrolase activity; GO:0008270 zinc ion bi…	K01489	cdd, CDA; cytidine deaminase [EC:3.5.4.5]	mdm00240 Pyrimidine metabolism - Malus domestica (apple); mdm01100 Metabolic pathways - Malus domestica (apple);	IPR002125; IPR016193; IPR013171;	Cytidine and deoxycytidylate deaminases, zinc-binding; Cytidine deaminase-like; Cytidine/deoxycytidylate deaminase, zinc-binding domain;
RchiOBHm_Chr2g0086111	ubiquitin-associated protein (DUF1068) [Arabidopsis thaliana]	0.618	Down	0.0111371	---	26.7	19.119	19	5	5	2	4	4	4	3	2	4	5	5	4	4	4	4	5	5	4	4	4	437680	344040	485390	274100	260770	248480	1.281	1.007	1.42	0.802	0.763	0.727	chloroplast
RchiOBHm_Chr2g0087061	Putative mannose-6-phosphate receptor binding domain-containing protein	0.41	Down	0.0065822	---	16.3	33.774	12	4	4	1	2	3	2	1	3	4	4	4	3	4	4	4	4	4	3	4	4	132880	117310	174170	45424	57822	70571	1.333	1.177	1.747	0.456	0.58	0.708	vacuolar membrane				K10088	OS9; protein OS-9	mdm04141 Protein processing in endoplasmic reticulum - Malus domestica (apple);	IPR009011; IPR012913;	Mannose-6-phosphate receptor binding domain; Glucosidase II beta subunit-like;
RchiOBHm_Chr2g0087491	Putative sucrose-phosphate synthase	0.392	Down	0.00082264	---	21.6	119.2	67	15	13	15	16	13	7	8	8	13	14	13	13	12	10	11	12	11	11	11	9	1054700	907030	828890	394880	386800	311210	1.63	1.401	1.281	0.61	0.598	0.481	nucleus	GO:0044723 single-organism carbohydrate metabolic process; GO:0008152 metabolic process; GO:0005985 sucrose metabolic process; GO:0044262 cellular carbohydrate metabolic process; GO:0044710 single-organism metabolic process; GO:0044763 single-organism cellular process; GO:0044699 single-organism process; GO:0009311 oligosaccharide metabolic process; GO:0005984 disaccharide metabolic process; GO:0…		GO:0016758 transferase activity, transferring hexosyl groups; GO:0003824 catalytic activity; GO:0046524 sucrose-phosphate synthase activity; GO:0035251 UDP-glucosyltransferase activity; GO:0008194 UDP-glycosyltransferase activity; GO:0046527 glucosyltransferase activity; GO:0016757 transferase activity, transferring glycosyl groups; GO:0016157 sucrose synthase activity; GO:0016740 transferase act…	K00696	E2.4.1.14; sucrose-phosphate synthase [EC:2.4.1.14]	mdm00500 Starch and sucrose metabolism - Malus domestica (apple); mdm01100 Metabolic pathways - Malus domestica (apple);	IPR006380; IPR000368; IPR001296;	Sucrose-phosphatase, N-terminal; Sucrose synthase; Glycosyl transferase, family 1;
RchiOBHm_Chr2g0093511	Putative feruloyl esterase	2.736	Up	0.00035505	---	29.7	29.772	20	5	5	1	3	2	4	5	5	4	4	3	4	5	5	4	4	3	4	5	5	292540	320240	242760	796820	819500	724000	0.549	0.601	0.456	1.496	1.539	1.359	cytoplasm				K06889	K06889; uncharacterized protein		IPR029058; IPR022742;	Alpha/Beta hydrolase fold; Serine aminopeptidase, S33;
RchiOBHm_Chr2g0094751	"Putative germin, rmlC-like cupin domain-containing protein"	3.516	Up	0.0053377	---	20.6	21.871	9	2	1	1	1	1	2	2	2	2	2	2	2	2	2	1	1	1	1	1	1	0	97944	90978	303170	272560	419970		0.413	0.384	1.28	1.15	1.773	chloroplast			GO:0046914 transition metal ion binding; GO:0005488 binding; GO:0043167 ion binding; GO:0046872 metal ion binding; GO:0043169 cation binding; GO:0045735 nutrient reservoir activity; GO:0030145 manganese ion binding;				IPR011051; IPR006045; IPR014710;	RmlC-like cupin domain; Cupin 1; RmlC-like jelly roll fold;
RchiOBHm_Chr2g0088431	Putative S-adenosyl-L-methionine-dependent methyltransferase	0.616	Down	0.0151355	---	16.6	36.346	9	4	4	2	2	2	1	1	1	2	3	4	3	3	3	2	3	4	3	3	3	120540	107890	154620	74541	74985	86357	1.169	1.046	1.499	0.723	0.727	0.837	mitochondria							IPR029063; IPR006342;	S-adenosyl-L-methionine-dependent methyltransferase; Methyltransferase FkbM;
RchiOBHm_Chr2g0089811	Putative oleoyl-[acyl-carrier-protein] hydrolase	0.589	Down	0.021996	---	25.8	46.013	14	5	5	3	4	4	1	1	1	4	5	5	4	4	4	4	5	5	4	4	4	90579	129210	102640	62338	52652	74908	1.061	1.513	1.202	0.73	0.617	0.877	chloroplast	GO:0044711 single-organism biosynthetic process; GO:0016053 organic acid biosynthetic process; GO:0044281 small molecule metabolic process; GO:0044763 single-organism cellular process; GO:0044699 single-organism process; GO:0009058 biosynthetic process; GO:0044255 cellular lipid metabolic process; GO:0006631 fatty acid metabolic process; GO:0044238 primary metabolic process; GO:0044237 cellular m…		GO:0016787 hydrolase activity; GO:0016790 thiolester hydrolase activity; GO:0003824 catalytic activity; GO:0016788 hydrolase activity, acting on ester bonds;	K10781	FATB; fatty acyl-ACP thioesterase B [EC:3.1.2.14 3.1.2.21]	mdm00061 Fatty acid biosynthesis - Malus domestica (apple); mdm01100 Metabolic pathways - Malus domestica (apple); mdm01212 Fatty acid metabolism - Malus domestica (apple);	IPR021113; IPR029069;	Acyl-ACP-thioesterase, N-terminal; HotDog domain;
RchiOBHm_Chr2g0090191	Putative signal peptidase I	0.638	Down	0.0021556	---	30.3	33.244	22	5	5	5	5	3	3	3	3	5	5	5	4	4	3	5	5	5	4	4	3	307570	297090	278900	190390	205180	168410	1.275	1.231	1.156	0.789	0.85	0.698	chloroplast	GO:0006508 proteolysis; GO:0008152 metabolic process; GO:0043170 macromolecule metabolic process; GO:0019538 protein metabolic process; GO:0044238 primary metabolic process; GO:0071704 organic substance metabolic process;	GO:0031224 intrinsic component of membrane; GO:0016020 membrane; GO:0016021 integral component of membrane; GO:0044425 membrane part;	GO:0070011 peptidase activity, acting on L-amino acid peptides; GO:0016787 hydrolase activity; GO:0008233 peptidase activity; GO:0003824 catalytic activity; GO:0017171 serine hydrolase activity; GO:0008236 serine-type peptidase activity;	K03100	lepB; signal peptidase I [EC:3.4.21.89]	mdm03060 Protein export - Malus domestica (apple);	IPR019533; IPR015927; IPR028360;	Peptidase S26; Peptidase S24/S26A/S26B/S26C; Peptidase S24/S26, beta-ribbon domain;
RchiOBHm_Chr2g0090721	Putative oxidoreductase	0.541	Down	0.00164198	---	42.3	54.678	46	14	13	10	11	8	6	6	5	14	13	12	10	11	10	13	12	11	10	10	10	495380	536220	559810	304260	246440	310220	1.212	1.312	1.37	0.744	0.603	0.759	cytoplasm	GO:0044699 single-organism process; GO:0008152 metabolic process; GO:0055114 oxidation-reduction process; GO:0044710 single-organism metabolic process;		GO:0016620 oxidoreductase activity, acting on the aldehyde or oxo group of donors, NAD or NADP as acceptor; GO:0003824 catalytic activity; GO:0016491 oxidoreductase activity; GO:0016903 oxidoreductase activity, acting on the aldehyde or oxo group of donors;	K12355	REF1; coniferyl-aldehyde dehydrogenase [EC:1.2.1.68]	mdm00940 Phenylpropanoid biosynthesis - Malus domestica (apple);	IPR016161; IPR015590; IPR016162; IPR016163;	Aldehyde/histidinol dehydrogenase; Aldehyde dehydrogenase domain; Aldehyde dehydrogenase N-terminal domain; Aldehyde dehydrogenase, C-terminal;
RchiOBHm_Chr2g0095431	Putative LSM domain-containing protein	1.973	Up	0.00864	---	26.2	14.721	8	2	2	1	2	0	1	2	2	2	2	2	2	2	2	2	2	2	2	2	2	63904	51050	66725	144300	116590	97609	0.71	0.567	0.741	1.603	1.295	1.084	cytoplasm	GO:0006725 cellular aromatic compound metabolic process; GO:0060255 regulation of macromolecule metabolic process; GO:0048519 negative regulation of biological process; GO:0044237 cellular metabolic process; GO:0071704 organic substance metabolic process; GO:0044270 cellular nitrogen compound catabolic process; GO:0008152 metabolic process; GO:0046483 heterocycle metabolic process; GO:0006139 nuc…			K12620	LSM1; U6 snRNA-associated Sm-like protein LSm1	mdm03018 RNA degradation - Malus domestica (apple);	IPR001163; IPR034104; IPR010920;	LSM domain, eukaryotic/archaea-type; Sm-like protein Lsm1; LSM domain;
RchiOBHm_Chr2g0097641	Putative strictosidine synthase transcription factor WD40-like family	1.808	Up	0.00055829	---	26.6	43.591	21	6	3	3	3	2	5	5	3	6	5	6	6	6	6	3	3	3	3	3	3	117690	131010	128750	227460	246540	208510	0.666	0.742	0.729	1.288	1.396	1.18	chloroplast	GO:0009058 biosynthetic process; GO:0008152 metabolic process;		GO:0016844 strictosidine synthase activity; GO:0016829 lyase activity; GO:0016840 carbon-nitrogen lyase activity; GO:0016843 amine-lyase activity; GO:0003824 catalytic activity;				IPR018119; IPR011042;	Strictosidine synthase, conserved region; Six-bladed beta-propeller, TolB-like;
RchiOBHm_Chr2g0097671	Putative chitinase	11.554	Up	0.00037708	---	54.6	28.393	25	8	8	0	1	0	8	8	8	6	6	3	8	8	8	6	6	3	8	8	8	97205	134310	125180	1444000	915870	1765600	0.13	0.18	0.168	1.933	1.226	2.364	extracellular	GO:1901071 glucosamine-containing compound metabolic process; GO:0006030 chitin metabolic process; GO:0044036 cell wall macromolecule metabolic process; GO:0006026 aminoglycan catabolic process; GO:1901136 carbohydrate derivative catabolic process; GO:0006807 nitrogen compound metabolic process; GO:0006032 chitin catabolic process; GO:0005975 carbohydrate metabolic process; GO:0044238 primary met…		GO:0004553 hydrolase activity, hydrolyzing O-glycosyl compounds; GO:0016787 hydrolase activity; GO:0004568 chitinase activity; GO:0003824 catalytic activity; GO:0016798 hydrolase activity, acting on glycosyl bonds;	K20547	CHIB; basic endochitinase B [EC:3.2.1.14]	mdm00520 Amino sugar and nucleotide sugar metabolism - Malus domestica (apple); mdm01100 Metabolic pathways - Malus domestica (apple); mdm04016 MAPK signaling pathway - plant - Malus domestica (apple);	IPR023346; IPR000726;	Lysozyme-like domain; Glycoside hydrolase, family 19, catalytic;
RchiOBHm_Chr2g0091401	"Putative Ninja family, Jas TPL-binding domain-containing protein"	0.326	Down	0.0106217	---	14.1	53.41	9	4	4	4	4	1	0	0	0	3	4	4	3	2	2	3	4	4	3	2	2	158600	105340	74037	33937	43776	32453	2.123	1.41	0.991	0.454	0.586	0.434	nucleus							IPR032308;	Jas TPL-binding domain;
RchiOBHm_Chr2g0091531	"Putative SKI-interacting protein, SKIP"	0.475	Down	0.049856	---	8.2	67.162	6	3	3	0	3	2	0	0	1	3	3	3	2	3	2	3	3	3	2	3	2	54868	75231	48728	28247	39958	16796	1.248	1.711	1.108	0.642	0.909	0.382	nucleus	GO:0006396 RNA processing; GO:0006725 cellular aromatic compound metabolic process; GO:1901360 organic cyclic compound metabolic process; GO:0006807 nitrogen compound metabolic process; GO:0044238 primary metabolic process; GO:0044237 cellular metabolic process; GO:0071704 organic substance metabolic process; GO:0006397 mRNA processing; GO:0016070 RNA metabolic process; GO:0000398 mRNA splicing, …	GO:0043229 intracellular organelle; GO:0044446 intracellular organelle part; GO:0032991 macromolecular complex; GO:0044424 intracellular part; GO:0005681 spliceosomal complex; GO:0005623 cell; GO:0044422 organelle part; GO:0043226 organelle; GO:0043231 intracellular membrane-bounded organelle; GO:0005634 nucleus; GO:0044464 cell part; GO:0005622 intracellular; GO:1990904 ribonucleoprotein complex…		K06063	SNW1, SKIIP, SKIP; SNW domain-containing protein 1	mdm03040 Spliceosome - Malus domestica (apple);	IPR004015;	SKI-interacting protein SKIP, SNW domain;
RchiOBHm_Chr2g0091661	Putative Golgin subfamily A member 5 protein	0.293	Down	0.0071004	---	12.7	80.915	10	5	4	2	3	2	2	0	1	3	3	4	4	2	5	3	3	3	4	1	4	185510	119650	123370	42631	0	41040	1.811	1.168	1.204	0.416		0.401	nucleus	GO:0016043 cellular component organization; GO:0010256 endomembrane system organization; GO:0007030 Golgi organization; GO:0009987 cellular process; GO:0006996 organelle organization; GO:0071840 cellular component organization or biogenesis;
RchiOBHm_Chr2g0099341	Vacuolar protein 8 [Morus notabilis]	1.839	Up	0.0036036	---	19.8	72.429	35	9	9	6	3	3	7	7	9	6	6	7	8	7	9	6	6	7	8	7	9	187960	140770	140270	280630	277920	303610	0.847	0.634	0.632	1.265	1.253	1.368	cytoplasm			GO:0005515 protein binding; GO:0005488 binding;				IPR011989; IPR016024;	Armadillo-like helical; Armadillo-type fold;
RchiOBHm_Chr2g0092211	Putative profilin	0.529	Down	0.032542	---	29.8	14.024	32	3	2	6	6	5	7	4	4	3	3	3	3	3	3	2	2	2	2	2	2	3076400	2927400	2035600	1045800	1433000	1770000	1.502	1.429	0.994	0.511	0.7	0.864	cytoplasm			GO:0003779 actin binding; GO:0005515 protein binding; GO:0008092 cytoskeletal protein binding; GO:0005488 binding;	K05759	PFN; profilin
RchiOBHm_Chr2g0100891	Putative theobromine synthase	1.856	Up	0.0100047	---	59.1	40.773	58	14	14	9	8	7	12	10	12	12	10	10	13	14	13	12	10	10	13	14	13	438970	434260	332510	862810	615880	759220	0.765	0.757	0.579	1.503	1.073	1.323	cytoplasm			GO:0016741 transferase activity, transferring one-carbon groups; GO:0008168 methyltransferase activity; GO:0003824 catalytic activity; GO:0016740 transferase activity;				IPR029063;	S-adenosyl-L-methionine-dependent methyltransferase;
RchiOBHm_Chr2g0092951	Putative saposin B type domain-containing protein	0.616	Down	0.021739	---	20.2	34.534	22	4	4	3	4	3	4	4	4	4	4	4	4	4	4	4	4	4	4	4	4	217330	258800	253230	115070	165880	168330	1.106	1.317	1.289	0.586	0.844	0.857	extracellular							IPR008139;	Saposin B type domain;
RchiOBHm_Chr2g0095311	Putative cucumisin	0.513	Down	0.00098337	---	37.1	80.568	85	17	17	16	14	16	13	12	14	15	17	14	16	15	13	15	17	14	16	15	13	1444700	1421200	1593500	825420	801010	662870	1.284	1.264	1.417	0.734	0.712	0.589	chloroplast	GO:0006508 proteolysis; GO:0008152 metabolic process; GO:0043170 macromolecule metabolic process; GO:0019538 protein metabolic process; GO:0044238 primary metabolic process; GO:0071704 organic substance metabolic process;		GO:0004252 serine-type endopeptidase activity; GO:0004175 endopeptidase activity; GO:0008233 peptidase activity; GO:0003824 catalytic activity; GO:0017171 serine hydrolase activity; GO:0008236 serine-type peptidase activity; GO:0070011 peptidase activity, acting on L-amino acid peptides; GO:0016787 hydrolase activity;				IPR003137; IPR034197; IPR009020; IPR000209; IPR010259;	PA domain; Cucumisin-like catalytic domain; Proteinase propeptide inhibitor; Peptidase S8/S53 domain; Peptidase S8 propeptide/proteinase inhibitor I9;
RchiOBHm_Chr2g0101431	Putative Nrap protein	1.806	Up	0.00041827	---	9.7	119.7	24	8	8	3	1	1	6	7	6	7	7	6	6	8	8	7	7	6	6	8	8	89455	87602	91145	176560	160990	146850	0.713	0.698	0.727	1.408	1.283	1.171	chloroplast				K14544	UTP22, NOL6; U3 small nucleolar RNA-associated protein 22	mdm03008 Ribosome biogenesis in eukaryotes - Malus domestica (apple);
RchiOBHm_Chr2g0096661	"transmembrane protein, putative [Medicago truncatula]"	0.245	Down	0.000139784	---	11.7	20.595	11	3	3	2	3	3	1	1	1	3	3	3	3	3	3	3	3	3	3	3	3	701700	552700	585650	170740	143930	136870	1.837	1.447	1.533	0.447	0.377	0.358	chloroplast
RchiOBHm_Chr2g0096691	Putative diacylglycerol O-acyltransferase	0.49	Down	0.018401	---	26.7	36.851	21	7	7	7	3	4	3	4	0	7	7	4	4	6	3	7	7	4	4	6	3	241370	274430	336400	138670	141090	137740	1.141	1.297	1.59	0.655	0.667	0.651	cytoplasm			GO:0016746 transferase activity, transferring acyl groups; GO:0016747 transferase activity, transferring acyl groups other than amino-acyl groups; GO:0003824 catalytic activity; GO:0016740 transferase activity;	K22848	mdm00561 Glycerolipid metabolism - Malus domestica (apple); mdm01100 Metabolic pathways - Malus domestica (apple);
RchiOBHm_Chr2g0106691	Putative cinnamyl-alcohol dehydrogenase	20.352	Up	7.794e-07	---	33.8	38.499	24	8	7	1	1	0	7	8	7	3	5	5	7	7	8	2	4	4	6	6	7	23705	26432	22459	517320	516170	445170	0.092	0.102	0.087	2.001	1.996	1.722	cytoplasm	GO:0044699 single-organism process; GO:0008152 metabolic process; GO:0055114 oxidation-reduction process; GO:0044710 single-organism metabolic process;		GO:0046914 transition metal ion binding; GO:0003824 catalytic activity; GO:0005488 binding; GO:0043167 ion binding; GO:0046872 metal ion binding; GO:0043169 cation binding; GO:0008270 zinc ion binding; GO:0016491 oxidoreductase activity;				IPR011032; IPR020843; IPR016040; IPR013154; IPR013149;	GroES-like; Polyketide synthase, enoylreductase domain; NAD(P)-binding domain; Alcohol dehydrogenase, N-terminal; Alcohol dehydrogenase, C-terminal;
RchiOBHm_Chr2g0097571	PREDICTED: protein GRIP [Fragaria vesca subsp. vesca]	0.619	Down	0.00186104	---	54.8	15.015	21	5	5	5	4	4	3	4	1	5	4	4	4	5	4	5	4	4	4	5	4	161980	168030	164780	113280	102870	90403	1.213	1.258	1.234	0.848	0.77	0.677	nucleus
RchiOBHm_Chr2g0097581	PREDICTED: protein GRIP [Fragaria vesca subsp. vesca]	0.594	Down	0.0029045	---	24.5	63.535	32	9	2	5	9	5	6	3	4	7	9	6	6	4	6	2	2	2	2	1	1	222890	195100	186160	125600	127220	105780	1.389	1.216	1.16	0.783	0.793	0.659	cytoplasm,nucleus
RchiOBHm_Chr2g0098371	Putative procollagen-proline dioxygenase	0.403	Down	0.00044485	---	35.8	32.643	36	6	6	7	6	7	4	6	6	6	6	5	5	5	4	6	6	5	5	5	4	638150	494620	546640	208990	242210	225360	1.625	1.26	1.392	0.532	0.617	0.574	mitochondria	GO:0044699 single-organism process; GO:0008152 metabolic process; GO:0055114 oxidation-reduction process; GO:0044710 single-organism metabolic process;		GO:0019842 vitamin binding; GO:0005506 iron ion binding; GO:0031418 L-ascorbic acid binding; GO:0043167 ion binding; GO:0043177 organic acid binding; GO:0016705 oxidoreductase activity, acting on paired donors, with incorporation or reduction of molecular oxygen; GO:0048029 monosaccharide binding; GO:0016491 oxidoreductase activity; GO:0031406 carboxylic acid binding; GO:0046914 transition metal …	K00472	P4HA; prolyl 4-hydroxylase [EC:1.14.11.2]	mdm00330 Arginine and proline metabolism - Malus domestica (apple); mdm01100 Metabolic pathways - Malus domestica (apple);	IPR006620; IPR005123;	Prolyl 4-hydroxylase, alpha subunit; Oxoglutarate/iron-dependent dioxygenase;
RchiOBHm_Chr2g0100181	Putative monodehydroascorbate reductase (NADH)	0.665	Down	0.00168201	---	60.2	13.049	14	6	5	2	2	4	3	1	2	6	6	5	4	4	5	5	5	5	4	3	4	198400	189100	223580	129950	137500	139130	1.17	1.115	1.318	0.766	0.811	0.82	chloroplast	GO:0050794 regulation of cellular process; GO:0042592 homeostatic process; GO:0065008 regulation of biological quality; GO:0050789 regulation of biological process; GO:0045454 cell redox homeostasis; GO:0044763 single-organism cellular process; GO:0019725 cellular homeostasis; GO:0044699 single-organism process; GO:0009987 cellular process; GO:0065007 biological regulation;			K03671	trxA; thioredoxin 1		IPR012336; IPR013766;	Thioredoxin-like fold; Thioredoxin domain;
RchiOBHm_Chr2g0107161	Putative NRAMP family protein	1.594	Up	0.00101765	---	14.8	55.439	20	4	4	3	4	3	4	3	3	4	4	3	3	2	2	4	4	3	3	2	2	156500	165440	161870	231300	268720	271290	0.748	0.791	0.774	1.106	1.285	1.297	plasma membrane	GO:0006810 transport; GO:0051179 localization; GO:0051234 establishment of localization;	GO:0016020 membrane;	GO:0005215 transporter activity;	K21398	SLC11A2, DMT1, NRAMP2; natural resistance-associated macrophage protein 2
RchiOBHm_Chr2g0100521	Putative dehydrin	0.296	Down	1.1588e-07	---	56.5	22.443	20	7	7	6	5	5	1	1	2	6	6	7	3	4	5	6	6	7	3	4	5	165280	170930	167390	51072	49589	48654	1.519	1.571	1.538	0.469	0.456	0.447	cytoplasm	GO:0001101 response to acid chemical; GO:0042221 response to chemical; GO:0009415 response to water; GO:0006950 response to stress; GO:0009628 response to abiotic stimulus; GO:1901700 response to oxygen-containing compound; GO:0010035 response to inorganic substance; GO:0050896 response to stimulus;
RchiOBHm_Chr2g0100611	Putative thioredoxin-like protein	0.395	Down	0.00140174	---	36.4	25.634	17	6	6	4	3	3	2	3	2	6	5	5	3	4	4	6	5	5	3	4	4	174100	216700	226570	80797	93586	69619	1.213	1.509	1.578	0.563	0.652	0.485	cytoplasm	GO:0050794 regulation of cellular process; GO:0042592 homeostatic process; GO:0065008 regulation of biological quality; GO:0050789 regulation of biological process; GO:0045454 cell redox homeostasis; GO:0044763 single-organism cellular process; GO:0019725 cellular homeostasis; GO:0044699 single-organism process; GO:0009987 cellular process; GO:0065007 biological regulation;						IPR012336; IPR013766;	Thioredoxin-like fold; Thioredoxin domain;
RchiOBHm_Chr2g0103241	Putative tetratricopeptide-like helical domain-containing protein	0.46	Down	0.0099436	---	26.6	50.871	25	8	8	5	6	7	3	2	2	7	7	7	5	5	4	7	7	7	5	5	4	267550	314650	313710	108990	185240	117780	1.227	1.443	1.439	0.5	0.85	0.54	nucleus			GO:0005515 protein binding; GO:0005488 binding;	K11372	HIF1; HAT1-interacting factor 1		IPR011990;	Tetratricopeptide-like helical domain;
RchiOBHm_Chr2g0107281	"Putative alpha/Beta hydrolase, strigolactone esterase D14 family"	2.266	Up	0.037577	---	28.8	30.045	13	4	4	0	2	2	2	4	3	2	2	3	3	4	3	2	2	3	3	4	3	30211	27796	29396	61613	86032	50319	0.635	0.584	0.618	1.295	1.809	1.058	cytoplasm							IPR029058; IPR000073;	Alpha/Beta hydrolase fold; Alpha/beta hydrolase fold-1;
RchiOBHm_Chr2g0109241	"Putative xyloglucan:xyloglucosyl transferase, Xyloglucan-specific endo-beta-1,4-glucanase"	5.615	Up	0.0020959	---	58.1	33.344	51	12	12	4	4	5	14	13	11	7	10	8	11	12	12	7	10	8	11	12	12	1432700	927810	768490	4238700	7385900	5941600	0.415	0.269	0.223	1.229	2.141	1.723	extracellular	GO:0044085 cellular component biogenesis; GO:0006073 cellular glucan metabolic process; GO:0044036 cell wall macromolecule metabolic process; GO:0044042 glucan metabolic process; GO:0005975 carbohydrate metabolic process; GO:0044238 primary metabolic process; GO:0044237 cellular metabolic process; GO:0010410 hemicellulose metabolic process; GO:0044264 cellular polysaccharide metabolic process; GO…	GO:0048046 apoplast; GO:0030312 external encapsulating structure; GO:0044464 cell part; GO:0071944 cell periphery; GO:0005618 cell wall; GO:0005623 cell; GO:0005576 extracellular region;	GO:0016762 xyloglucan:xyloglucosyl transferase activity; GO:0016758 transferase activity, transferring hexosyl groups; GO:0003824 catalytic activity; GO:0016798 hydrolase activity, acting on glycosyl bonds; GO:0004553 hydrolase activity, hydrolyzing O-glycosyl compounds; GO:0016757 transferase activity, transferring glycosyl groups; GO:0016787 hydrolase activity; GO:0016740 transferase activity;	K08235	E2.4.1.207; xyloglucan:xyloglucosyl transferase [EC:2.4.1.207]		IPR010713; IPR013320; IPR000757;	Xyloglucan endo-transglycosylase, C-terminal; Concanavalin A-like lectin/glucanase domain; Glycoside hydrolase family 16;
RchiOBHm_Chr2g0104961	Putative protein kinase CAMK-CDPK family	0.635	Down	0.0054568	---	13.6	68.05	16	5	4	4	4	4	2	1	1	5	5	5	5	5	4	4	4	4	4	4	3	136040	117790	117430	83480	68248	83919	1.345	1.164	1.161	0.825	0.675	0.83	chloroplast	GO:0016310 phosphorylation; GO:0044267 cellular protein metabolic process; GO:0044238 primary metabolic process; GO:0044237 cellular metabolic process; GO:0006796 phosphate-containing compound metabolic process; GO:0071704 organic substance metabolic process; GO:0008152 metabolic process; GO:0006468 protein phosphorylation; GO:0006793 phosphorus metabolic process; GO:0044260 cellular macromolecul…		GO:0005524 ATP binding; GO:1901265 nucleoside phosphate binding; GO:0016773 phosphotransferase activity, alcohol group as acceptor; GO:0001882 nucleoside binding; GO:0043167 ion binding; GO:0004672 protein kinase activity; GO:0000166 nucleotide binding; GO:0097159 organic cyclic compound binding; GO:1901363 heterocyclic compound binding; GO:0032549 ribonucleoside binding; GO:0097367 carbohydrate …	K00924	E2.7.1.-; kinase [EC:2.7.1.-]		IPR000719; IPR011992; IPR011009;	Protein kinase domain; EF-hand domain pair; Protein kinase-like domain;
RchiOBHm_Chr2g0105091	Putative methionyl aminopeptidase	0.603	Down	0.0041587	---	19.5	38.773	15	4	4	4	2	3	2	2	2	4	4	4	3	4	3	4	4	4	3	4	3	79709	61593	67044	40145	40410	45155	1.432	1.106	1.204	0.721	0.726	0.811	chloroplast	GO:0006508 proteolysis; GO:0008152 metabolic process; GO:0043170 macromolecule metabolic process; GO:0019538 protein metabolic process; GO:0044238 primary metabolic process; GO:0071704 organic substance metabolic process;		GO:0008233 peptidase activity; GO:0008238 exopeptidase activity; GO:0003824 catalytic activity; GO:0008235 metalloexopeptidase activity; GO:0070011 peptidase activity, acting on L-amino acid peptides; GO:0016787 hydrolase activity; GO:0004177 aminopeptidase activity; GO:0008237 metallopeptidase activity;	K01265	map; methionyl aminopeptidase [EC:3.4.11.18]		IPR000994;	Peptidase M24;
RchiOBHm_Chr2g0110071	Putative glycine hydroxymethyltransferase	2.099	Up	0.00103565	---	59.6	57.147	90	22	16	13	13	12	21	17	14	19	19	19	22	22	21	13	13	13	16	16	15	1127900	1202800	957290	2264200	2534700	2099900	0.664	0.708	0.564	1.334	1.493	1.237	mitochondria	GO:0044281 small molecule metabolic process; GO:0044763 single-organism cellular process; GO:0006807 nitrogen compound metabolic process; GO:0044699 single-organism process; GO:0044238 primary metabolic process; GO:0006544 glycine metabolic process; GO:1901605 alpha-amino acid metabolic process; GO:0044237 cellular metabolic process; GO:0071704 organic substance metabolic process; GO:0008152 meta…		GO:0097159 organic cyclic compound binding; GO:1901363 heterocyclic compound binding; GO:0003824 catalytic activity; GO:0005488 binding; GO:0043167 ion binding; GO:0004372 glycine hydroxymethyltransferase activity; GO:0016741 transferase activity, transferring one-carbon groups; GO:0043168 anion binding; GO:0016742 hydroxymethyl-, formyl- and related transferase activity; GO:0048037 cofactor bind…	K00600	glyA, SHMT; glycine hydroxymethyltransferase [EC:2.1.2.1]	mdm00260 Glycine, serine and threonine metabolism - Malus domestica (apple); mdm00460 Cyanoamino acid metabolism - Malus domestica (apple); mdm00630 Glyoxylate and dicarboxylate metabolism - Malus domestica (apple); mdm00670 One carbon pool by folate - Malus domestica (apple); mdm01100 Metabolic pathways - Malus domestica (apple); mdm01110 Biosynthesis of secondary metabolites - Malus domestica (…	IPR015424; IPR015421; IPR015422;	Pyridoxal phosphate-dependent transferase; Pyridoxal phosphate-dependent transferase, major region, subdomain 1; Pyridoxal phosphate-dependent transferase, major region, subdomain 2;
RchiOBHm_Chr2g0111661	Putative mitochondrial brown fat uncoupling protein	4.177	Up	0.0038006	---	52.3	34.318	49	11	10	5	4	5	14	12	9	5	6	5	10	9	7	5	6	5	10	9	7	263400	245670	135140	932930	709140	1048200	0.474	0.442	0.243	1.679	1.276	1.886	cytoplasm	GO:0006810 transport; GO:0051179 localization; GO:0006839 mitochondrial transport; GO:0051234 establishment of localization;	GO:0016020 membrane; GO:0043229 intracellular organelle; GO:0044429 mitochondrial part; GO:0031090 organelle membrane; GO:0005737 cytoplasm; GO:0044446 intracellular organelle part; GO:0031967 organelle envelope; GO:0044424 intracellular part; GO:0005623 cell; GO:0044422 organelle part; GO:0005739 mitochondrion; GO:0005740 mitochondrial envelope; GO:0043231 intracellular membrane-bounded organell…		K15104	SLC25A11, OGC; solute carrier family 25 (mitochondrial oxoglutarate transporter), member 11		IPR023395;	Mitochondrial carrier domain;
RchiOBHm_Chr2g0105701	Zeaxanthin epoxidase	0.526	Down	0.0027994	---	15.5	72.273	26	9	9	5	5	4	3	5	4	8	8	7	7	8	6	8	8	7	7	8	6	264520	234300	256350	135710	110420	151220	1.377	1.22	1.335	0.707	0.575	0.787	chloroplast	GO:1901615 organic hydroxy compound metabolic process; GO:0016053 organic acid biosynthetic process; GO:0009687 abscisic acid metabolic process; GO:0006066 alcohol metabolic process; GO:1902645 tertiary alcohol biosynthetic process; GO:0044699 single-organism process; GO:0044255 cellular lipid metabolic process; GO:0009058 biosynthetic process; GO:0044237 cellular metabolic process; GO:0071704 or…	GO:0043226 organelle; GO:0043231 intracellular membrane-bounded organelle; GO:0043229 intracellular organelle; GO:0016020 membrane; GO:0044464 cell part; GO:0005622 intracellular; GO:0005737 cytoplasm; GO:0044424 intracellular part; GO:0043227 membrane-bounded organelle; GO:0005623 cell; GO:0009536 plastid; GO:0044444 cytoplasmic part; GO:0009507 chloroplast;	GO:0016709 oxidoreductase activity, acting on paired donors, with incorporation or reduction of molecular oxygen, NAD(P)H as one donor, and incorporation of one atom of oxygen; GO:0009540 zeaxanthin epoxidase [overall] activity; GO:1901265 nucleoside phosphate binding; GO:0050660 flavin adenine dinucleotide binding; GO:0043167 ion binding; GO:0016705 oxidoreductase activity, acting on paired dono…	K09838	ZEP, ABA1; zeaxanthin epoxidase [EC:1.14.15.21]	mdm00906 Carotenoid biosynthesis - Malus domestica (apple); mdm01100 Metabolic pathways - Malus domestica (apple); mdm01110 Biosynthesis of secondary metabolites - Malus domestica (apple);	IPR008984; IPR002938; IPR000253; IPR023753;	SMAD/FHA domain; FAD-binding domain; Forkhead-associated (FHA) domain; FAD/NAD(P)-binding domain;
RchiOBHm_Chr2g0112461	Putative protein kinase CAMK-OST1L family	2.328	Up	0.0017826	---	41.1	38.438	47	10	5	9	7	6	8	9	8	8	8	8	9	10	10	5	5	5	4	5	5	372460	277700	289150	693890	663020	830500	0.715	0.533	0.555	1.332	1.272	1.594	cytoplasm	GO:0016310 phosphorylation; GO:0044267 cellular protein metabolic process; GO:0044238 primary metabolic process; GO:0044237 cellular metabolic process; GO:0006796 phosphate-containing compound metabolic process; GO:0071704 organic substance metabolic process; GO:0008152 metabolic process; GO:0006468 protein phosphorylation; GO:0006793 phosphorus metabolic process; GO:0044260 cellular macromolecul…		GO:0005524 ATP binding; GO:1901265 nucleoside phosphate binding; GO:0016773 phosphotransferase activity, alcohol group as acceptor; GO:0001882 nucleoside binding; GO:0043167 ion binding; GO:0004672 protein kinase activity; GO:0000166 nucleotide binding; GO:0097159 organic cyclic compound binding; GO:1901363 heterocyclic compound binding; GO:0032549 ribonucleoside binding; GO:0097367 carbohydrate …	K14498	SNRK2; serine/threonine-protein kinase SRK2 [EC:2.7.11.1]	mdm04016 MAPK signaling pathway - plant - Malus domestica (apple); mdm04075 Plant hormone signal transduction - Malus domestica (apple);	IPR000719; IPR011009;	Protein kinase domain; Protein kinase-like domain;
RchiOBHm_Chr2g0107441	Putative protein kinase CMGC-CK2 family	0.585	Down	0.0052243	---	40	46.379	46	11	10	9	9	10	5	8	5	11	10	11	9	10	8	10	9	10	8	9	7	471660	398160	409060	251480	283640	213700	1.396	1.178	1.21	0.744	0.839	0.632	chloroplast	GO:0016310 phosphorylation; GO:0044267 cellular protein metabolic process; GO:0044238 primary metabolic process; GO:0044237 cellular metabolic process; GO:0006796 phosphate-containing compound metabolic process; GO:0071704 organic substance metabolic process; GO:0008152 metabolic process; GO:0006468 protein phosphorylation; GO:0006793 phosphorus metabolic process; GO:0044260 cellular macromolecul…		GO:0005524 ATP binding; GO:1901265 nucleoside phosphate binding; GO:0016773 phosphotransferase activity, alcohol group as acceptor; GO:0001882 nucleoside binding; GO:0043167 ion binding; GO:0004672 protein kinase activity; GO:0000166 nucleotide binding; GO:0097159 organic cyclic compound binding; GO:1901363 heterocyclic compound binding; GO:0032549 ribonucleoside binding; GO:0097367 carbohydrate …	K03097	CSNK2A; casein kinase II subunit alpha [EC:2.7.11.1]	mdm03008 Ribosome biogenesis in eukaryotes - Malus domestica (apple); mdm04712 Circadian rhythm - plant - Malus domestica (apple);	IPR000719; IPR011009;	Protein kinase domain; Protein kinase-like domain;
RchiOBHm_Chr2g0115211	"Putative glucan 1,3-beta-glucosidase"	1.733	Up	0.00045725	---	23.4	56.261	20	9	9	3	2	1	5	6	3	6	8	6	8	9	7	6	8	6	8	9	7	150980	167930	140670	260440	268810	267320	0.721	0.802	0.672	1.244	1.284	1.277	extracellular	GO:0008152 metabolic process; GO:0005975 carbohydrate metabolic process; GO:0044238 primary metabolic process; GO:0071704 organic substance metabolic process;		GO:0004553 hydrolase activity, hydrolyzing O-glycosyl compounds; GO:0016787 hydrolase activity; GO:0003824 catalytic activity; GO:0016798 hydrolase activity, acting on glycosyl bonds;				IPR001547; IPR017853; IPR013781; IPR008999;	Glycoside hydrolase, family 5; Glycoside hydrolase superfamily; Glycoside hydrolase, catalytic domain; Actin cross-linking;
RchiOBHm_Chr2g0108401	Putative xyloglucan 6-xylosyltransferase	0.049	Down	0.0024211	---	51	5.5052	6	2	2	2	1	2	1	0	0	2	2	2	2	1	2	2	2	2	2	1	2	137230	80853	182870	6473.5	0	6708.8	1.657	0.976	2.208	0.078		0.081	chloroplast
RchiOBHm_Chr2g0109071	Putative S-adenosyl-L-methionine-dependent methyltransferase	0.534	Down	0.00104074	---	50.8	28.357	51	10	8	10	10	9	6	8	8	10	10	10	10	10	10	8	8	8	8	8	8	796150	684220	654430	349910	405440	384840	1.459	1.254	1.199	0.641	0.743	0.705	chloroplast							IPR029063;	S-adenosyl-L-methionine-dependent methyltransferase;
RchiOBHm_Chr2g0119391	Putative oxidoreductase	5.061	Up	0.00234	---	21.7	56.873	14	7	7	0	2	1	2	5	4	4	4	5	7	7	6	4	4	5	7	7	6	33456	45705	60432	195120	316560	194190	0.237	0.324	0.429	1.385	2.247	1.378	chloroplast	GO:0044699 single-organism process; GO:0008152 metabolic process; GO:0055114 oxidation-reduction process; GO:0044710 single-organism metabolic process;		GO:0097159 organic cyclic compound binding; GO:1901363 heterocyclic compound binding; GO:0020037 heme binding; GO:0005506 iron ion binding; GO:0046914 transition metal ion binding; GO:0003824 catalytic activity; GO:0005488 binding; GO:0043167 ion binding; GO:0043169 cation binding; GO:0046872 metal ion binding; GO:0016705 oxidoreductase activity, acting on paired donors, with incorporation or red…
RchiOBHm_Chr2g0109961	Eukaryotic translation initiation factor 2 subunit beta	0.622	Down	0.0029375	---	33.3	30.326	27	7	7	5	7	4	4	5	2	4	5	5	4	5	6	4	5	5	4	5	6	618390	651500	567310	353710	428780	359510	1.245	1.312	1.143	0.712	0.864	0.724	nucleus	GO:0006518 peptide metabolic process; GO:0043043 peptide biosynthetic process; GO:0044267 cellular protein metabolic process; GO:0006807 nitrogen compound metabolic process; GO:0009058 biosynthetic process; GO:0043603 cellular amide metabolic process; GO:0044238 primary metabolic process; GO:1901566 organonitrogen compound biosynthetic process; GO:0044237 cellular metabolic process; GO:1901576 or…		GO:0097159 organic cyclic compound binding; GO:1901363 heterocyclic compound binding; GO:0003723 RNA binding; GO:0008135 translation factor activity, RNA binding; GO:0005488 binding; GO:0003676 nucleic acid binding; GO:0003743 translation initiation factor activity;	K03238	EIF2S2; translation initiation factor 2 subunit 2	mdm03013 RNA transport - Malus domestica (apple);	IPR016189; IPR016190; IPR002735;	Translation initiation factor IF2/IF5, N-terminal; Translation initiation factor IF2/IF5, zinc-binding; Translation initiation factor IF2/IF5;
RchiOBHm_Chr2g0110711	Putative 1-deoxy-D-xylulose-5-phosphate synthase	0.511	Down	0.010004	---	24.4	79.114	55	11	10	12	13	10	6	8	6	9	11	9	7	10	7	8	10	8	6	9	6	1055100	1062600	931610	622410	385490	550670	1.374	1.384	1.213	0.81	0.502	0.717	chloroplast	GO:0006720 isoprenoid metabolic process; GO:0044711 single-organism biosynthetic process; GO:0044763 single-organism cellular process; GO:0044699 single-organism process; GO:0009058 biosynthetic process; GO:0044255 cellular lipid metabolic process; GO:0044238 primary metabolic process; GO:0044237 cellular metabolic process; GO:1901576 organic substance biosynthetic process; GO:0044249 cellular bi…		GO:0008661 1-deoxy-D-xylulose-5-phosphate synthase activity; GO:0016740 transferase activity; GO:0003824 catalytic activity; GO:0016744 transferase activity, transferring aldehyde or ketonic groups;	K01662	dxs; 1-deoxy-D-xylulose-5-phosphate synthase [EC:2.2.1.7]	mdm00730 Thiamine metabolism - Malus domestica (apple); mdm00900 Terpenoid backbone biosynthesis - Malus domestica (apple); mdm01100 Metabolic pathways - Malus domestica (apple); mdm01110 Biosynthesis of secondary metabolites - Malus domestica (apple);	IPR005474; IPR009014; IPR033248; IPR005475; IPR029061;	Transketolase, N-terminal; Transketolase C-terminal/Pyruvate-ferredoxin oxidoreductase domain II; Transketolase, C-terminal domain; Transketolase-like, pyrimidine-binding domain; Thiamin diphosphate-binding fold;
RchiOBHm_Chr2g0111231	Putative GDP-fucose protein O-fucosyltransferase	0.649	Down	0.0153003	---	10.4	59.107	15	4	3	3	4	2	3	2	1	4	4	2	4	2	3	3	3	1	3	1	2	78494	71549	79562	56651	52242	40230	1.244	1.134	1.26	0.897	0.828	0.637	plasma membrane
RchiOBHm_Chr2g0111951	Putative laccase	0.575	Down	0.005023	---	16.2	62.833	64	8	7	12	11	11	11	10	9	8	7	7	8	7	7	7	6	6	7	6	6	2035700	2175000	1703400	1194200	1217300	987280	1.312	1.401	1.097	0.769	0.784	0.636	cytoplasm	GO:0006725 cellular aromatic compound metabolic process; GO:0055114 oxidation-reduction process; GO:0044712 single-organism catabolic process; GO:0044763 single-organism cellular process; GO:1901360 organic cyclic compound metabolic process; GO:0044699 single-organism process; GO:0044237 cellular metabolic process; GO:0009698 phenylpropanoid metabolic process; GO:0071704 organic substance metabol…	GO:0048046 apoplast; GO:0005576 extracellular region;	GO:0016682 oxidoreductase activity, acting on diphenols and related substances as donors, oxygen as acceptor; GO:0046914 transition metal ion binding; GO:0016679 oxidoreductase activity, acting on diphenols and related substances as donors; GO:0003824 catalytic activity; GO:0005488 binding; GO:0043167 ion binding; GO:0046872 metal ion binding; GO:0043169 cation binding; GO:0052716 hydroquinone:ox…	K05909	E1.10.3.2; laccase [EC:1.10.3.2]		IPR034289; IPR008972; IPR011706; IPR011707; IPR034285; IPR034288; IPR001117;	Laccase, third cupredoxin domain; Cupredoxin; Multicopper oxidase, type 2; Multicopper oxidase, type 3; Laccase, second cupredoxin domain; Laccase, first cupredoxin domain; Multicopper oxidase, type 1;
RchiOBHm_Chr2g0112261	phage capsid scaffolding protein (GPO) serine peptidase [Medicago truncatula]	0.508	Down	0.00108369	---	33.5	22.188	25	5	5	6	5	7	3	2	2	5	4	5	5	4	4	5	4	5	5	4	4	444280	450240	498610	206910	265670	234790	1.269	1.286	1.424	0.591	0.759	0.671	chloroplast
RchiOBHm_Chr2g0112721	Putative 3-deoxy-7-phosphoheptulonate synthase	0.393	Down	0.00024143	---	45.3	58.474	94	15	14	16	19	21	14	13	11	15	15	15	14	14	14	14	14	14	13	13	13	2976000	3301100	3419400	1428300	1227300	1154700	1.322	1.466	1.519	0.634	0.545	0.513	chloroplast	GO:0008652 cellular amino acid biosynthetic process; GO:0009072 aromatic amino acid family metabolic process; GO:0016053 organic acid biosynthetic process; GO:0044711 single-organism biosynthetic process; GO:0006725 cellular aromatic compound metabolic process; GO:0044281 small molecule metabolic process; GO:0044763 single-organism cellular process; GO:0044699 single-organism process; GO:0006807 …		GO:0016765 transferase activity, transferring alkyl or aryl (other than methyl) groups; GO:0003849 3-deoxy-7-phosphoheptulonate synthase activity; GO:0003824 catalytic activity; GO:0016740 transferase activity;	K01626	E2.5.1.54, aroF, aroG, aroH; 3-deoxy-7-phosphoheptulonate synthase [EC:2.5.1.54]	mdm00400 Phenylalanine, tyrosine and tryptophan biosynthesis - Malus domestica (apple); mdm01100 Metabolic pathways - Malus domestica (apple); mdm01110 Biosynthesis of secondary metabolites - Malus domestica (apple); mdm01230 Biosynthesis of amino acids - Malus domestica (apple);
RchiOBHm_Chr2g0113231	Putative ubiquitinyl hydrolase 1	0.608	Down	0.000144707	---	19.8	42.016	12	5	5	2	4	3	1	1	1	4	5	5	3	3	3	4	5	5	3	3	3	101990	92420	99635	58215	61971	58684	1.294	1.173	1.264	0.739	0.786	0.745	nucleus	GO:0043632 modification-dependent macromolecule catabolic process; GO:0070646 protein modification by small protein removal; GO:0044265 cellular macromolecule catabolic process; GO:0051603 proteolysis involved in cellular protein catabolic process; GO:0044257 cellular protein catabolic process; GO:0019941 modification-dependent protein catabolic process; GO:0044267 cellular protein metabolic proc…		GO:0008233 peptidase activity; GO:0036459 thiol-dependent ubiquitinyl hydrolase activity; GO:0003824 catalytic activity; GO:0101005 ubiquitinyl hydrolase activity; GO:0070011 peptidase activity, acting on L-amino acid peptides; GO:0019783 ubiquitin-like protein-specific protease activity; GO:0008234 cysteine-type peptidase activity; GO:0016787 hydrolase activity;	K11842	USP12_46; ubiquitin carboxyl-terminal hydrolase 12/46 [EC:3.4.19.12]		IPR028889; IPR001394;	Ubiquitin specific protease domain; Peptidase C19, ubiquitin carboxyl-terminal hydrolase;
RchiOBHm_Chr2g0113351	Putative transcription factor CG1-CAMTA family	0.594	Down	0.0177027	---	10	120.25	18	5	5	5	3	5	1	2	2	5	5	4	5	4	4	5	5	4	5	4	4	141520	134550	118200	66871	68263	98904	1.351	1.285	1.129	0.639	0.652	0.944	nucleus		GO:0043226 organelle; GO:0043231 intracellular membrane-bounded organelle; GO:0043229 intracellular organelle; GO:0005634 nucleus; GO:0044464 cell part; GO:0005622 intracellular; GO:0044424 intracellular part; GO:0043227 membrane-bounded organelle; GO:0005623 cell;	GO:0097159 organic cyclic compound binding; GO:1901363 heterocyclic compound binding; GO:0003677 DNA binding; GO:0005515 protein binding; GO:0005488 binding; GO:0003676 nucleic acid binding;	K21596	CAMTA; calmodulin-binding transcription activator		IPR013783; IPR014756; IPR020683; IPR005559; IPR027417; IPR002909;	Immunoglobulin-like fold; Immunoglobulin E-set; Ankyrin repeat-containing domain; CG-1 DNA-binding domain; P-loop containing nucleoside triphosphate hydrolase; IPT domain;
RchiOBHm_Chr2g0114441	Putative DNA oxidative demethylase	0.489	Down	0.0070425	---	39.9	31.134	29	8	7	6	5	5	5	4	4	7	6	8	7	6	5	7	5	7	6	5	4	457510	470390	382820	239760	237920	163070	1.407	1.446	1.177	0.737	0.732	0.501	nucleus							IPR025131;	Domain of unknown function DUF4057;
RchiOBHm_Chr2g0115531	Putative C2 domain-containing protein	0.578	Down	0.00036368	---	36.7	228.3	222	54	54	49	47	39	29	29	29	53	50	44	45	43	44	53	50	44	45	43	44	3628600	3458500	3444500	2179000	1859600	2049200	1.31	1.249	1.244	0.787	0.671	0.74	endoplasmic reticulum			GO:0005515 protein binding; GO:0005488 binding;				IPR011989; IPR016024; IPR000008;	Armadillo-like helical; Armadillo-type fold; C2 domain;
RchiOBHm_Chr2g0115611	Putative transcription regulator SAP family	0.518	Down	0.00121968	---	26.5	86.822	42	12	12	9	8	7	6	7	5	12	12	12	11	12	12	12	12	12	11	12	12	856960	776680	746780	423890	452050	358030	1.423	1.289	1.24	0.704	0.75	0.594	nucleus			GO:0097159 organic cyclic compound binding; GO:1901363 heterocyclic compound binding; GO:1901265 nucleoside phosphate binding; GO:0005488 binding; GO:0003676 nucleic acid binding; GO:0000166 nucleotide binding; GO:0036094 small molecule binding;	K12875	ACIN1, ACINUS; apoptotic chromatin condensation inducer in the nucleus	mdm03013 RNA transport - Malus domestica (apple); mdm03015 mRNA surveillance pathway - Malus domestica (apple); mdm03040 Spliceosome - Malus domestica (apple);	IPR003034; IPR034257; IPR000504; IPR012677;	SAP domain; Acinus, RNA recognition motif; RNA recognition motif domain; Nucleotide-binding alpha-beta plait domain;
RchiOBHm_Chr2g0117361	Putative tetratricopeptide-like helical domain-containing protein	0.274	Down	0.0062418	---	11.9	41.152	8	4	4	3	3	2	0	0	0	4	4	4	3	3	3	4	4	4	3	3	3	88835	85419	84248	27547	23930	19372	1.618	1.556	1.535	0.502	0.436	0.353	chloroplast			GO:0005515 protein binding; GO:0005488 binding;				IPR011990; IPR013026;	Tetratricopeptide-like helical domain; Tetratricopeptide repeat-containing domain;
RchiOBHm_Chr2g0120091	Putative ribonucleoside-diphosphate reductase	3.038	Up	4.0706e-05	---	28.8	91.371	43	15	15	2	2	2	11	12	14	8	10	9	13	12	14	8	10	9	13	12	14	135310	143240	162180	432380	463200	443800	0.456	0.483	0.547	1.457	1.561	1.496	cytoplasm	GO:0006260 DNA replication; GO:0006725 cellular aromatic compound metabolic process; GO:0055114 oxidation-reduction process; GO:0006259 DNA metabolic process; GO:0044699 single-organism process; GO:1901360 organic cyclic compound metabolic process; GO:0006807 nitrogen compound metabolic process; GO:0009058 biosynthetic process; GO:0044238 primary metabolic process; GO:1901576 organic substance bi…		GO:0005524 ATP binding; GO:0016725 oxidoreductase activity, acting on CH or CH2 groups; GO:1901265 nucleoside phosphate binding; GO:0001882 nucleoside binding; GO:0043167 ion binding; GO:0061731 ribonucleoside-diphosphate reductase activity; GO:0004748 ribonucleoside-diphosphate reductase activity, thioredoxin disulfide as acceptor; GO:0000166 nucleotide binding; GO:0016491 oxidoreductase activit…	K10807	RRM1; ribonucleoside-diphosphate reductase subunit M1 [EC:1.17.4.1]	mdm00230 Purine metabolism - Malus domestica (apple); mdm00240 Pyrimidine metabolism - Malus domestica (apple); mdm00480 Glutathione metabolism - Malus domestica (apple); mdm01100 Metabolic pathways - Malus domestica (apple);	IPR000788; IPR005144; IPR013509; IPR013346; IPR008926;	Ribonucleotide reductase large subunit, C-terminal; ATP-cone domain; Ribonucleotide reductase large subunit, N-terminal; Ribonucleotide reductase, class I , alpha subunit; Ribonucleotide reductase R1 subunit, N-terminal;
RchiOBHm_Chr2g0122701	Putative DnaJ domain-containing protein	0.464	Down	0.0111172	---	16.8	103.57	12	10	8	4	5	2	0	1	0	8	9	10	6	9	5	8	8	8	6	8	4	187220	174220	113470	66039	81642	72463	1.616	1.504	0.98	0.57	0.705	0.626	nucleus							IPR001623;	DnaJ domain;
RchiOBHm_Chr2g0123581	Putative GAT domain-containing protein	0.622	Down	0.004136	---	17.4	44.068	12	4	4	3	3	2	1	2	1	4	4	3	4	4	4	4	4	3	4	4	4	85607	89961	101080	52512	64720	54748	1.145	1.203	1.352	0.702	0.866	0.732	cytoplasm	GO:0045184 establishment of protein localization; GO:0006810 transport; GO:0046907 intracellular transport; GO:0070727 cellular macromolecule localization; GO:0051649 establishment of localization in cell; GO:0006886 intracellular protein transport; GO:0071702 organic substance transport; GO:0008104 protein localization; GO:0033036 macromolecule localization; GO:0034613 cellular protein localizat…	GO:0005623 cell; GO:0005622 intracellular; GO:0044464 cell part;					IPR002014; IPR004152; IPR008942;	VHS domain; GAT domain; ENTH/VHS;
RchiOBHm_Chr2g0126631	"Putative mannan endo-1,4-beta-mannosidase"	0.614	Down	0.00161922	---	31.1	51.155	24	9	9	4	3	7	3	4	3	7	8	9	5	8	6	7	8	9	5	8	6	293730	271580	287550	157210	172910	193620	1.28	1.184	1.253	0.685	0.754	0.844	mitochondria	GO:0008152 metabolic process; GO:0005975 carbohydrate metabolic process; GO:0044238 primary metabolic process; GO:0071704 organic substance metabolic process;		GO:0004553 hydrolase activity, hydrolyzing O-glycosyl compounds; GO:0016787 hydrolase activity; GO:0003824 catalytic activity; GO:0016798 hydrolase activity, acting on glycosyl bonds;	K19355	MAN; mannan endo-1,4-beta-mannosidase [EC:3.2.1.78]	mdm00051 Fructose and mannose metabolism - Malus domestica (apple); mdm01100 Metabolic pathways - Malus domestica (apple);	IPR017853; IPR001547; IPR013781;	Glycoside hydrolase superfamily; Glycoside hydrolase, family 5; Glycoside hydrolase, catalytic domain;
RchiOBHm_Chr2g0128381	Putative endosulphine	0.35	Down	0.031461	---	49.5	11.774	17	5	5	5	5	3	1	2	1	5	5	4	2	4	4	5	5	4	2	4	4	138910	132340	88167	39777	64234	21597	1.718	1.637	1.091	0.492	0.795	0.267	mitochondria
RchiOBHm_Chr2g0124821	Putative EF-hand domain pair protein	2.38	Up	0.030883	---	11.9	23.974	11	2	2	2	1	1	1	3	3	2	2	2	2	2	2	2	2	2	2	2	2	40426	40893	50222	75691	79328	158130	0.545	0.552	0.678	1.021	1.07	2.134	chloroplast			GO:0043169 cation binding; GO:0046872 metal ion binding; GO:0005509 calcium ion binding; GO:0005488 binding; GO:0043167 ion binding;	K13448	CML; calcium-binding protein CML	mdm04626 Plant-pathogen interaction - Malus domestica (apple);	IPR011992; IPR002048;	EF-hand domain pair; EF-hand domain;
RchiOBHm_Chr2g0124891	Putative chromatin remodeling & transcription regulator ABTB family	2.235	Up	0.0049647	---	24	55.095	26	7	7	4	3	3	4	6	6	7	6	6	6	6	6	7	6	6	6	6	6	177740	170290	119230	388260	304260	351650	0.706	0.676	0.473	1.541	1.208	1.396	chloroplast			GO:0005515 protein binding; GO:0005488 binding;	K14508	NPR1; regulatory protein NPR1	mdm04075 Plant hormone signal transduction - Malus domestica (apple);	IPR011333; IPR024228; IPR020683; IPR000210;	SKP1/BTB/POZ domain; Regulatory protein NPR, central domain; Ankyrin repeat-containing domain; BTB/POZ domain;
RchiOBHm_Chr2g0129771	Putative protein kinase TKL-CTR1-DRK-1 family	0.596	Down	0.035801	---	5.2	88.824	10	3	3	2	3	1	1	1	2	3	3	3	3	3	3	3	3	3	3	3	3	74258	75929	63616	36775	33419	57242	1.306	1.335	1.119	0.647	0.588	1.006	chloroplast	GO:0016310 phosphorylation; GO:0044267 cellular protein metabolic process; GO:0044238 primary metabolic process; GO:0044237 cellular metabolic process; GO:0006796 phosphate-containing compound metabolic process; GO:0071704 organic substance metabolic process; GO:0008152 metabolic process; GO:0006468 protein phosphorylation; GO:0006793 phosphorus metabolic process; GO:0044260 cellular macromolecul…		GO:0005524 ATP binding; GO:1901265 nucleoside phosphate binding; GO:0016773 phosphotransferase activity, alcohol group as acceptor; GO:0001882 nucleoside binding; GO:0043167 ion binding; GO:0004672 protein kinase activity; GO:0000166 nucleotide binding; GO:0097159 organic cyclic compound binding; GO:1901363 heterocyclic compound binding; GO:0032549 ribonucleoside binding; GO:0097367 carbohydrate …				IPR000719; IPR001245; IPR011009;	Protein kinase domain; Serine-threonine/tyrosine-protein kinase catalytic domain; Protein kinase-like domain;
RchiOBHm_Chr2g0134411	Putative cobalamin (vitamin B12) biosynthesis CobW	0.446	Down	0.00141821	---	24	50.274	34	7	7	6	7	7	5	5	4	7	7	7	6	7	7	7	7	7	6	7	7	933780	862230	804770	427880	415360	317830	1.489	1.375	1.284	0.682	0.662	0.507	chloroplast							IPR027417; IPR003495; IPR011629;	P-loop containing nucleoside triphosphate hydrolase; CobW/HypB/UreG, nucleotide-binding domain; Cobalamin (vitamin B12) biosynthesis CobW-like, C-terminal;
RchiOBHm_Chr2g0127471	Putative aromatic-amino-acid transaminase	1.76	Up	0.030299	---	14.1	45.87	18	4	4	3	3	3	3	2	4	4	4	4	3	3	4	4	4	4	3	3	4	80827	45129	52115	101600	97915	113820	0.987	0.551	0.636	1.241	1.196	1.39	cytoplasm	GO:0044281 small molecule metabolic process; GO:0044763 single-organism cellular process; GO:0006807 nitrogen compound metabolic process; GO:0044699 single-organism process; GO:0009058 biosynthetic process; GO:0044238 primary metabolic process; GO:0044237 cellular metabolic process; GO:0071704 organic substance metabolic process; GO:0008152 metabolic process; GO:0006520 cellular amino acid metabo…		GO:0097159 organic cyclic compound binding; GO:1901363 heterocyclic compound binding; GO:0016769 transferase activity, transferring nitrogenous groups; GO:0003824 catalytic activity; GO:0005488 binding; GO:0043167 ion binding; GO:0043168 anion binding; GO:0008483 transaminase activity; GO:0016740 transferase activity; GO:0048037 cofactor binding; GO:0030170 pyridoxal phosphate binding;	K00815	TAT; tyrosine aminotransferase [EC:2.6.1.5]	mdm00130 Ubiquinone and other terpenoid-quinone biosynthesis - Malus domestica (apple); mdm00270 Cysteine and methionine metabolism - Malus domestica (apple); mdm00350 Tyrosine metabolism - Malus domestica (apple); mdm00360 Phenylalanine metabolism - Malus domestica (apple); mdm00400 Phenylalanine, tyrosine and tryptophan biosynthesis - Malus domestica (apple); mdm00950 Isoquinoline alkaloid bios…	IPR004839; IPR015424; IPR015421; IPR015422;	Aminotransferase, class I/classII; Pyridoxal phosphate-dependent transferase; Pyridoxal phosphate-dependent transferase, major region, subdomain 1; Pyridoxal phosphate-dependent transferase, major region, subdomain 2;
RchiOBHm_Chr2g0135221	Putative non-specific protein-tyrosine kinase RLK-Pelle-RLCK-XV family	0.592	Down	0.0078172	---	25.9	41.474	26	6	6	6	6	4	4	2	4	6	6	6	6	6	6	6	6	6	6	6	6	197700	167640	193000	129980	106620	93852	1.335	1.132	1.303	0.877	0.72	0.634	mitochondria	GO:0016310 phosphorylation; GO:0044267 cellular protein metabolic process; GO:0044238 primary metabolic process; GO:0044237 cellular metabolic process; GO:0006796 phosphate-containing compound metabolic process; GO:0071704 organic substance metabolic process; GO:0008152 metabolic process; GO:0006468 protein phosphorylation; GO:0006793 phosphorus metabolic process; GO:0044260 cellular macromolecul…		GO:0005524 ATP binding; GO:1901265 nucleoside phosphate binding; GO:0016773 phosphotransferase activity, alcohol group as acceptor; GO:0001882 nucleoside binding; GO:0043167 ion binding; GO:0004672 protein kinase activity; GO:0000166 nucleotide binding; GO:0097159 organic cyclic compound binding; GO:1901363 heterocyclic compound binding; GO:0032549 ribonucleoside binding; GO:0097367 carbohydrate …				IPR000719; IPR011009;	Protein kinase domain; Protein kinase-like domain;
RchiOBHm_Chr2g0129071	"Putative PMR5 domain, PC-Esterase"	2.259	Up	0.0051837	---	33.5	42.793	34	9	9	4	4	5	7	6	8	8	9	8	9	8	6	8	9	8	9	8	6	192570	177330	221710	450780	539720	345640	0.599	0.552	0.69	1.403	1.68	1.076	extracellular							IPR025846;	PMR5 N-terminal domain;
RchiOBHm_Chr2g0136541	Putative acetyl-CoA carboxylase	0.594	Down	0.0157428	---	14.3	29.187	10	3	3	2	3	3	1	1	0	3	3	3	3	2	3	3	3	3	3	2	3	99567	87093	110760	58551	70358	47902	1.26	1.102	1.401	0.741	0.89	0.606	chloroplast							IPR011053; IPR000089;	Single hybrid motif; Biotin/lipoyl attachment;
RchiOBHm_Chr2g0136911	Putative chaperone DnaJ	0.57	Down	0.025019	---	19.8	47.042	26	7	7	7	6	5	1	4	3	7	6	7	4	5	5	7	6	7	4	5	5	325360	269240	276650	153480	216360	126990	1.427	1.181	1.213	0.673	0.949	0.557	chloroplast	GO:0006457 protein folding; GO:0050896 response to stimulus; GO:0006950 response to stress; GO:0009987 cellular process; GO:0009408 response to heat; GO:0009628 response to abiotic stimulus; GO:0009266 response to temperature stimulus;		GO:0005524 ATP binding; GO:0031072 heat shock protein binding; GO:1901265 nucleoside phosphate binding; GO:0001882 nucleoside binding; GO:0043167 ion binding; GO:0005515 protein binding; GO:0000166 nucleotide binding; GO:0097159 organic cyclic compound binding; GO:1901363 heterocyclic compound binding; GO:0032549 ribonucleoside binding; GO:0097367 carbohydrate derivative binding; GO:0032553 ribon…	K03686	dnaJ; molecular chaperone DnaJ		IPR008971; IPR002939; IPR001623; IPR001305;	HSP40/DnaJ peptide-binding; Chaperone DnaJ, C-terminal; DnaJ domain; Heat shock protein DnaJ, cysteine-rich domain;
RchiOBHm_Chr2g0137111	DUF2921 family protein [Medicago truncatula]	0.317	Down	0.00031777	---	4.9	120.58	10	4	4	4	3	3	0	0	0	4	3	3	3	3	2	4	3	3	3	3	2	93388	78803	87614	28479	30832	23116	1.637	1.382	1.536	0.499	0.541	0.405	plasma membrane
RchiOBHm_Chr2g0137391	Putative methionine N(alpha)-acetyltransferase NatB	0.597	Down	3.5765e-05	---	39.9	102.57	114	28	28	22	24	25	11	16	16	23	23	27	23	25	22	23	23	27	23	25	22	1927700	2013000	1892800	1124600	1171900	1189900	1.241	1.296	1.219	0.724	0.754	0.766	cytoplasm			GO:0005515 protein binding; GO:0005488 binding;	K20792	NAA15_16; N-alpha-acetyltransferase 15/16, NatA auxiliary subunit		IPR011990; IPR013026;	Tetratricopeptide-like helical domain; Tetratricopeptide repeat-containing domain;
RchiOBHm_Chr2g0137631	"Putative PH domain, nuclear pore complex, NUP2/50/61 protein"	0.494	Down	0.0011988	---	41.4	39.353	41	12	12	8	9	8	4	6	6	11	11	10	11	11	11	11	11	10	11	11	11	1350000	1368900	1063700	620940	648850	599160	1.433	1.453	1.129	0.659	0.689	0.636	nucleus	GO:0006810 transport; GO:0046907 intracellular transport; GO:0051649 establishment of localization in cell; GO:0051179 localization; GO:0051234 establishment of localization; GO:0051641 cellular localization;	GO:0043229 intracellular organelle; GO:0005643 nuclear pore; GO:0005635 nuclear envelope; GO:0044446 intracellular organelle part; GO:0031967 organelle envelope; GO:0012505 endomembrane system; GO:0032991 macromolecular complex; GO:0044424 intracellular part; GO:0005623 cell; GO:0044422 organelle part; GO:0043226 organelle; GO:0043231 intracellular membrane-bounded organelle; GO:0005634 nucleus; …		K15304	RANBP3; Ran-binding protein 3		IPR000156; IPR011993; IPR015007;	Ran binding domain; PH domain-like; Nuclear pore complex, NUP2/50/61;
RchiOBHm_Chr2g0133081	Putative cinnamoyl-CoA reductase	1.941	Up	0.0067233	---	28.5	37.298	25	8	8	5	4	3	3	5	5	7	7	5	6	8	6	7	7	5	6	8	6	194880	136010	168110	359750	277470	331520	0.797	0.556	0.687	1.471	1.134	1.355	chloroplast			GO:0048037 cofactor binding; GO:0003824 catalytic activity; GO:0005488 binding; GO:0050662 coenzyme binding;	K09753	CCR; cinnamoyl-CoA reductase [EC:1.2.1.44]	mdm00940 Phenylpropanoid biosynthesis - Malus domestica (apple); mdm01100 Metabolic pathways - Malus domestica (apple); mdm01110 Biosynthesis of secondary metabolites - Malus domestica (apple);	IPR001509; IPR016040;	NAD-dependent epimerase/dehydratase; NAD(P)-binding domain;
RchiOBHm_Chr2g0138001	BZIP protein [Medicago truncatula]	0.513	Down	0.032125	---	8.7	83.889	6	4	4	2	1	3	0	0	0	3	4	4	3	3	3	3	4	4	3	3	3	58483	45436	73765	21888	33253	35955	1.306	1.014	1.647	0.489	0.742	0.803	nucleus							IPR006868; IPR006867;	Domain of unknown function DUF630; Domain of unknown function DUF632;
RchiOBHm_Chr2g0139071	"Putative TATA element modulatory factor 1 TATA binding, TATA element modulatory factor 1 DNA binding"	0.615	Down	0.006963	---	22.4	115.75	60	18	18	11	14	12	8	7	8	17	18	18	13	14	14	17	18	18	13	14	14	829980	899090	871600	609110	548390	442230	1.186	1.284	1.245	0.87	0.783	0.632	nucleus				K20286	TMF1; TATA element modulatory factor
RchiOBHm_Chr2g0139361	DNA-directed RNA polymerase subunit beta [Arabidopsis thaliana]	0.519	Down	0.0014577	---	24.1	54.376	40	9	9	6	9	8	4	7	6	9	9	9	6	8	8	9	9	9	6	8	8	445960	405740	477780	255310	234000	201070	1.325	1.205	1.419	0.758	0.695	0.597	peroxisome
RchiOBHm_Chr2g0139461	"Putative protein kinase A anchor protein, nuclear localisation signal"	0.398	Down	0.00024453	---	13.7	54.48	10	3	3	2	2	2	2	1	1	3	3	3	3	3	2	3	3	3	3	3	2	55845	56765	54181	24967	22118	19332	1.437	1.46	1.394	0.642	0.569	0.497	chloroplast			GO:0097159 organic cyclic compound binding; GO:1901363 heterocyclic compound binding; GO:0003723 RNA binding; GO:0005488 binding; GO:0003676 nucleic acid binding;	K18666	ASCC1; activating signal cointegrator complex subunit 1		IPR004087; IPR004088; IPR009097; IPR019510;	K Homology domain; K Homology domain, type 1; RNA ligase/cyclic nucleotide phosphodiesterase; Protein kinase A anchor protein, nuclear localisation signal domain;
RchiOBHm_Chr2g0141171	Putative triacylglycerol lipase	1.6	Up	0.00128229	---	42.3	38.27	34	10	7	6	5	5	6	7	5	7	7	7	9	9	9	5	5	6	6	7	6	269750	292480	290830	418430	499590	446390	0.73	0.791	0.787	1.132	1.352	1.208	extracellular			GO:0016787 hydrolase activity; GO:0003824 catalytic activity; GO:0016788 hydrolase activity, acting on ester bonds;				IPR001087; IPR013830;	GDSL lipase/esterase; SGNH hydrolase-type esterase domain;
RchiOBHm_Chr2g0139591	PREDICTED: VHS domain-containing protein At3g16270 [Fragaria vesca subsp. vesca]	0.632	Down	0.00025622	---	42	37.142	46	11	11	11	8	9	6	8	4	11	10	10	11	11	8	11	10	10	11	11	8	619560	601660	570450	382700	392270	356480	1.272	1.235	1.171	0.786	0.805	0.732	nucleus	GO:0045184 establishment of protein localization; GO:0006810 transport; GO:0046907 intracellular transport; GO:0070727 cellular macromolecule localization; GO:0051649 establishment of localization in cell; GO:0006886 intracellular protein transport; GO:0071702 organic substance transport; GO:0008104 protein localization; GO:0033036 macromolecule localization; GO:0034613 cellular protein localizat…						IPR002014; IPR013809; IPR008942;	VHS domain; ENTH domain; ENTH/VHS;
RchiOBHm_Chr2g0142431	Putative flavanone 3-dioxygenase	0.238	Down	0.0106608	---	58.4	39.906	68	15	3	16	12	17	8	6	9	12	12	14	14	9	14	3	3	3	2	2	3	3177700	3202000	3017800	650410	604310	980840	1.639	1.652	1.556	0.335	0.312	0.506	chloroplast	GO:0044699 single-organism process; GO:0008152 metabolic process; GO:0055114 oxidation-reduction process; GO:0044710 single-organism metabolic process;		GO:0003824 catalytic activity; GO:0016491 oxidoreductase activity;				IPR027443; IPR005123; IPR026992;	Isopenicillin N synthase-like; Oxoglutarate/iron-dependent dioxygenase; Non-haem dioxygenase N-terminal domain;
RchiOBHm_Chr2g0142571	Putative inorganic diphosphatase	0.42	Down	0.029682	---	26.1	30.474	14	5	5	4	2	3	2	2	1	5	5	5	4	5	4	5	5	5	4	5	4	162010	183400	122360	43918	52392	100170	1.463	1.657	1.105	0.397	0.473	0.905	cytoplasm			GO:0016787 hydrolase activity; GO:0003824 catalytic activity; GO:0042578 phosphoric ester hydrolase activity; GO:0016791 phosphatase activity; GO:0016788 hydrolase activity, acting on ester bonds;	K13248	PHOSPHO2; pyridoxal phosphate phosphatase PHOSPHO2 [EC:3.1.3.74]	mdm00750 Vitamin B6 metabolism - Malus domestica (apple); mdm01100 Metabolic pathways - Malus domestica (apple);	IPR023214;	HAD-like domain;
RchiOBHm_Chr2g0144721	"Putative LsmAD domain, ataxin-2, ataxin 2, SM domain-containing protein"	0.542	Down	0.0044583	---	31.9	68.521	25	11	11	4	6	5	3	3	4	7	8	8	7	7	6	7	8	8	7	7	6	277770	288930	219420	127140	157020	142060	1.375	1.43	1.086	0.629	0.777	0.703	nucleus							IPR009604; IPR025852; IPR009818;	LsmAD domain; Ataxin 2, SM domain; Ataxin-2, C-terminal;
RchiOBHm_Chr2g0145081	"Putative GTP binding protein, second"	0.588	Down	0.020181	---	49.6	44.55	52	14	14	11	10	11	7	8	5	12	12	12	13	13	9	12	12	12	13	13	9	786060	771870	776910	504160	477450	390910	1.272	1.249	1.257	0.816	0.773	0.633	cytoplasm			GO:1901265 nucleoside phosphate binding; GO:0001882 nucleoside binding; GO:0043167 ion binding; GO:0000166 nucleotide binding; GO:0097159 organic cyclic compound binding; GO:1901363 heterocyclic compound binding; GO:0032549 ribonucleoside binding; GO:0097367 carbohydrate derivative binding; GO:0032553 ribonucleotide binding; GO:0005488 binding; GO:0032550 purine ribonucleoside binding; GO:0043168…	K06944	K06944; uncharacterized protein		IPR012676; IPR005225; IPR006073; IPR004095; IPR031167; IPR031662; IPR027417;	TGS-like; Small GTP-binding protein domain; GTP binding domain; TGS; OBG-type guanine nucleotide-binding (G) domain; GTP binding protein, second domain; P-loop containing nucleoside triphosphate hydrolase;
RchiOBHm_Chr2g0145781	Putative exportin-1/Importin-beta	1.505	Up	0.0028961	---	7.1	111.46	18	5	5	3	3	1	3	3	5	4	4	4	4	5	5	4	4	4	4	5	5	39860	42568	47978	69175	61860	65149	0.732	0.782	0.881	1.271	1.136	1.197	cytoplasm			GO:0005488 binding;	K14288	XPOT; exportin-T	mdm03013 RNA transport - Malus domestica (apple);	IPR013598; IPR011989; IPR016024;	Exportin-1/Importin-beta-like; Armadillo-like helical; Armadillo-type fold;
RchiOBHm_Chr2g0145921	Putative flavonoid 3'-monooxygenase	1.83	Up	0.032538	---	5.2	64.955	8	3	3	0	1	0	1	4	2	3	2	1	3	3	3	3	2	1	3	3	3	34161	44461	0	60891	85236	69548	0.58	0.755		1.035	1.448	1.182	cytoplasm	GO:0044699 single-organism process; GO:0008152 metabolic process; GO:0055114 oxidation-reduction process; GO:0044710 single-organism metabolic process;		GO:0097159 organic cyclic compound binding; GO:1901363 heterocyclic compound binding; GO:0020037 heme binding; GO:0005506 iron ion binding; GO:0046914 transition metal ion binding; GO:0003824 catalytic activity; GO:0005488 binding; GO:0043167 ion binding; GO:0043169 cation binding; GO:0046872 metal ion binding; GO:0016705 oxidoreductase activity, acting on paired donors, with incorporation or red…	K20623	CYP92A6; typhasterol/6-deoxotyphasterol 2alpha-hydroxylase	mdm00905 Brassinosteroid biosynthesis - Malus domestica (apple); mdm01100 Metabolic pathways - Malus domestica (apple); mdm01110 Biosynthesis of secondary metabolites - Malus domestica (apple);
RchiOBHm_Chr2g0145961	Putative linoleate 13S-lipoxygenase	0.316	Down	0.00036257	---	30.6	103.32	46	17	16	11	11	12	5	3	4	16	17	17	13	13	13	15	16	16	12	12	12	734140	651560	795230	262000	195030	232710	1.534	1.362	1.662	0.548	0.408	0.486	cytoplasm	GO:0044699 single-organism process; GO:0008152 metabolic process; GO:0055114 oxidation-reduction process; GO:0044710 single-organism metabolic process;		GO:0016702 oxidoreductase activity, acting on single donors with incorporation of molecular oxygen, incorporation of two atoms of oxygen; GO:0016701 oxidoreductase activity, acting on single donors with incorporation of molecular oxygen; GO:0003824 catalytic activity; GO:0005488 binding; GO:0051213 dioxygenase activity; GO:0043167 ion binding; GO:0043169 cation binding; GO:0046872 metal ion bindi…	K00454	LOX2S; lipoxygenase [EC:1.13.11.12]	mdm00591 Linoleic acid metabolism - Malus domestica (apple); mdm00592 alpha-Linolenic acid metabolism - Malus domestica (apple); mdm01100 Metabolic pathways - Malus domestica (apple); mdm01110 Biosynthesis of secondary metabolites - Malus domestica (apple);	IPR027433; IPR001024; IPR013819;	Lipoxygenase, domain 3; PLAT/LH2 domain; Lipoxygenase, C-terminal;
RchiOBHm_Chr2g0149111	"Putative germin, rmlC-like jelly roll"	5.522	Up	0.00145565	---	18.2	21.962	16	3	3	1	2	2	3	5	3	2	3	3	3	3	3	2	3	3	3	3	3	125940	153130	127250	511640	1036000	696900	0.285	0.347	0.288	1.158	2.345	1.577	cytoplasm			GO:0046914 transition metal ion binding; GO:0005488 binding; GO:0043167 ion binding; GO:0046872 metal ion binding; GO:0043169 cation binding; GO:0045735 nutrient reservoir activity; GO:0030145 manganese ion binding;				IPR011051; IPR006045; IPR014710;	RmlC-like cupin domain; Cupin 1; RmlC-like jelly roll fold;
RchiOBHm_Chr2g0147671	Putative cucumisin	0.394	Down	0.028362	---	15.4	82.238	13	6	6	4	3	3	1	2	0	5	5	5	3	4	4	5	5	5	3	4	4	140770	167690	144660	75362	72592	30584	1.337	1.593	1.374	0.716	0.69	0.291	chloroplast	GO:0006508 proteolysis; GO:0008152 metabolic process; GO:0043170 macromolecule metabolic process; GO:0019538 protein metabolic process; GO:0044238 primary metabolic process; GO:0071704 organic substance metabolic process;		GO:0004252 serine-type endopeptidase activity; GO:0004175 endopeptidase activity; GO:0008233 peptidase activity; GO:0003824 catalytic activity; GO:0017171 serine hydrolase activity; GO:0008236 serine-type peptidase activity; GO:0070011 peptidase activity, acting on L-amino acid peptides; GO:0016787 hydrolase activity;				IPR003137; IPR034197; IPR009020; IPR000209; IPR010259;	PA domain; Cucumisin-like catalytic domain; Proteinase propeptide inhibitor; Peptidase S8/S53 domain; Peptidase S8 propeptide/proteinase inhibitor I9;
RchiOBHm_Chr2g0149871	"Putative glucan endo-1,3-beta-D-glucosidase"	6.398	Up	0.00193981	---	40.7	35.679	21	8	8	0	0	0	7	10	4	3	4	3	6	8	5	3	4	3	6	8	5	59164	52836	47343	345740	468170	204990	0.301	0.269	0.241	1.761	2.384	1.044	chloroplast	GO:0008152 metabolic process; GO:0005975 carbohydrate metabolic process; GO:0044238 primary metabolic process; GO:0071704 organic substance metabolic process;		GO:0004553 hydrolase activity, hydrolyzing O-glycosyl compounds; GO:0016787 hydrolase activity; GO:0003824 catalytic activity; GO:0016798 hydrolase activity, acting on glycosyl bonds;				IPR017853; IPR013781;	Glycoside hydrolase superfamily; Glycoside hydrolase, catalytic domain;
RchiOBHm_Chr2g0155141	Putative chlorophyll A-B binding protein	1.764	Up	0.0104034	---	14.5	29.817	10	3	3	0	2	2	2	2	2	2	3	2	3	3	2	2	3	2	3	3	2	48893	55205	45990	95470	70066	99191	0.707	0.799	0.665	1.381	1.013	1.435	chloroplast				K08909	LHCA3; light-harvesting complex I chlorophyll a/b binding protein 3	mdm00196 Photosynthesis - antenna proteins - Malus domestica (apple); mdm01100 Metabolic pathways - Malus domestica (apple);	IPR023329;	Chlorophyll a/b binding protein domain;
RchiOBHm_Chr2g0156601	Putative chlorophyll A-B binding protein	1.78	Up	0.0077153	---	42.6	28.439	20	6	2	3	3	3	3	4	4	5	5	5	6	5	5	2	2	2	2	1	2	662130	784540	532780	1084800	1208900	1229800	0.722	0.855	0.581	1.183	1.318	1.341	chloroplast				K08913	LHCB2; light-harvesting complex II chlorophyll a/b binding protein 2	mdm00196 Photosynthesis - antenna proteins - Malus domestica (apple); mdm01100 Metabolic pathways - Malus domestica (apple);	IPR023329;	Chlorophyll a/b binding protein domain;
RchiOBHm_Chr2g0149831	Putative adenosinetriphosphatase	0.389	Down	0.0054008	---	27.5	79.768	46	13	13	11	10	12	3	3	7	11	13	11	8	8	12	11	13	11	8	8	12	390160	457670	447700	121650	218870	164210	1.3	1.525	1.492	0.405	0.729	0.547	cytoplasm			GO:0005524 ATP binding; GO:1901265 nucleoside phosphate binding; GO:0001882 nucleoside binding; GO:0043167 ion binding; GO:0016817 hydrolase activity, acting on acid anhydrides; GO:0016787 hydrolase activity; GO:0000166 nucleotide binding; GO:0017111 nucleoside-triphosphatase activity; GO:0016887 ATPase activity; GO:0097159 organic cyclic compound binding; GO:1901363 heterocyclic compound binding…	K06184	ABCF1; ATP-binding cassette, subfamily F, member 1		IPR003593; IPR003439; IPR027417;	AAA+ ATPase domain; ABC transporter-like; P-loop containing nucleoside triphosphate hydrolase;
RchiOBHm_Chr2g0149901	Putative GDP-fucose protein O-fucosyltransferase	0.556	Down	0.00076122	---	52.6	46.354	66	17	15	9	13	16	8	11	9	15	17	17	15	13	14	13	15	15	13	11	12	3601000	3372300	3394900	2158500	1826900	1783800	1.339	1.254	1.262	0.803	0.679	0.663	vacuolar membrane
RchiOBHm_Chr2g0150131	Putative glycosyltransferase	0.183	Down	0.000141696	---	15.3	79.57	18	8	7	6	7	4	0	0	1	7	8	7	7	5	6	6	7	6	6	4	5	399530	393170	320250	77984	56034	69393	1.821	1.792	1.46	0.355	0.255	0.316	plasma membrane							IPR029044;	Nucleotide-diphospho-sugar transferases;
RchiOBHm_Chr2g0152091	Putative 16S rRNA (cytosine(1407)-C(5))-methyltransferase	0.53	Down	0.0077574	---	12.2	65.244	9	4	4	4	1	2	1	0	1	4	4	4	2	3	4	4	4	4	2	3	4	51282	48633	53825	22450	24701	34279	1.308	1.241	1.373	0.573	0.63	0.875	chloroplast,mitochondria			GO:0097159 organic cyclic compound binding; GO:1901363 heterocyclic compound binding; GO:0003723 RNA binding; GO:0008168 methyltransferase activity; GO:0003824 catalytic activity; GO:0005488 binding; GO:0003676 nucleic acid binding; GO:0016741 transferase activity, transferring one-carbon groups; GO:0016740 transferase activity;	K21971	NSUN6; methyltransferase NSUN6 [EC:2.1.1.-]		IPR001678; IPR015947; IPR029063; IPR002478;	SAM-dependent methyltransferase RsmB/NOP2-type; PUA-like domain; S-adenosyl-L-methionine-dependent methyltransferase; PUA domain;
RchiOBHm_Chr2g0152351	Putative 15-cis-phytoene synthase	0.456	Down	0.0051574	---	33.9	44.937	22	8	7	6	4	4	2	2	4	7	7	7	8	6	7	6	6	7	7	5	6	451510	325220	444030	220610	163490	172310	1.524	1.098	1.499	0.745	0.552	0.582	chloroplast	GO:0016129 phytosteroid biosynthetic process; GO:1901615 organic hydroxy compound metabolic process; GO:0044107 cellular alcohol metabolic process; GO:1902652 secondary alcohol metabolic process; GO:0006066 alcohol metabolic process; GO:1902653 secondary alcohol biosynthetic process; GO:0044699 single-organism process; GO:0044255 cellular lipid metabolic process; GO:0009058 biosynthetic process; …		GO:0004310 farnesyl-diphosphate farnesyltransferase activity; GO:0016765 transferase activity, transferring alkyl or aryl (other than methyl) groups; GO:0004659 prenyltransferase activity; GO:0004311 farnesyltranstransferase activity; GO:0003824 catalytic activity; GO:0016740 transferase activity; GO:0051996 squalene synthase activity;	K02291	crtB; 15-cis-phytoene/all-trans-phytoene synthase [EC:2.5.1.32 2.5.1.99]	mdm00906 Carotenoid biosynthesis - Malus domestica (apple); mdm01100 Metabolic pathways - Malus domestica (apple); mdm01110 Biosynthesis of secondary metabolites - Malus domestica (apple);	IPR008949; IPR033904;	Isoprenoid synthase domain; Trans-Isoprenyl Diphosphate Synthases, head-to-head;
RchiOBHm_Chr2g0154771	Putative RNA helicase	0.553	Down	0.027922	---	23.9	69.878	28	9	9	8	5	4	4	4	3	8	7	7	7	9	6	8	7	7	7	9	6	324080	283270	196700	130090	142140	172850	1.557	1.361	0.945	0.625	0.683	0.83	chloroplast			GO:0005524 ATP binding; GO:1901265 nucleoside phosphate binding; GO:0001882 nucleoside binding; GO:0043167 ion binding; GO:0000166 nucleotide binding; GO:0097159 organic cyclic compound binding; GO:1901363 heterocyclic compound binding; GO:0032549 ribonucleoside binding; GO:0097367 carbohydrate derivative binding; GO:0032553 ribonucleotide binding; GO:0005488 binding; GO:0003676 nucleic acid bind…				IPR014014; IPR011545; IPR014001; IPR027417; IPR001650;	RNA helicase, DEAD-box type, Q motif; DEAD/DEAH box helicase domain; Helicase superfamily 1/2, ATP-binding domain; P-loop containing nucleoside triphosphate hydrolase; Helicase, C-terminal;
RchiOBHm_Chr2g0155651	Putative GDP-fucose protein O-fucosyltransferase	0.618	Down	0.00047974	---	41.2	65.26	78	18	18	15	14	18	11	10	10	17	17	17	15	13	17	17	17	17	15	13	17	1574700	1820700	1656800	1068600	1005400	1048600	1.156	1.336	1.216	0.784	0.738	0.77	mitochondria
RchiOBHm_Chr2g0158111	"Putative glucan endo-1,3-beta-D-glucosidase"	1.56	Up	0.034623	---	5.2	52.072	3	2	2	0	0	0	2	0	1	2	2	2	2	2	2	2	2	2	2	2	2	26576	19741	22976	44289	31358	32385	0.899	0.668	0.777	1.499	1.061	1.096	chloroplast	GO:0008152 metabolic process; GO:0005975 carbohydrate metabolic process; GO:0044238 primary metabolic process; GO:0071704 organic substance metabolic process;		GO:0004553 hydrolase activity, hydrolyzing O-glycosyl compounds; GO:0016787 hydrolase activity; GO:0003824 catalytic activity; GO:0016798 hydrolase activity, acting on glycosyl bonds;				IPR012946; IPR017853; IPR013781;	X8 domain; Glycoside hydrolase superfamily; Glycoside hydrolase, catalytic domain;
RchiOBHm_Chr2g0155681	Putative GBF-interacting protein	0.278	Down	0.00083851	---	9.5	91.846	15	6	6	5	4	4	1	1	0	6	6	6	5	6	5	6	6	6	5	6	5	133910	126790	94327	31917	38569	28252	1.771	1.677	1.247	0.422	0.51	0.374	nucleus			GO:0005515 protein binding; GO:0005488 binding;				IPR009060;	UBA-like;
RchiOBHm_Chr2g0155831	Putative cadmium-transporting ATPase	0.634	Down	0.0057634	---	24.1	80.415	54	13	13	10	9	13	8	8	6	11	12	13	12	13	9	11	12	13	12	13	9	814600	670830	700970	462330	412820	510230	1.368	1.127	1.178	0.777	0.693	0.857	chloroplast							IPR004147; IPR011009;	UbiB domain; Protein kinase-like domain;
RchiOBHm_Chr2g0156021	"Putative PAS-associated, phytochrome, histidine kinase domain, GAF domain-containing protein"	0.66	Down	0.0045185	---	7.1	124.92	13	5	5	4	4	2	1	1	1	5	5	5	4	3	2	5	5	5	4	3	2	365160	329880	341980	217810	258930	208050	1.272	1.15	1.192	0.759	0.902	0.725	mitochondria	GO:0044700 single organism signaling; GO:0050794 regulation of cellular process; GO:0009581 detection of external stimulus; GO:0009628 response to abiotic stimulus; GO:0060255 regulation of macromolecule metabolic process; GO:0019219 regulation of nucleobase-containing compound metabolic process; GO:0044267 cellular protein metabolic process; GO:0017006 protein-tetrapyrrole linkage; GO:0044699 si…		GO:0038023 signaling receptor activity; GO:0016773 phosphotransferase activity, alcohol group as acceptor; GO:0004673 protein histidine kinase activity; GO:0046983 protein dimerization activity; GO:0005515 protein binding; GO:0004672 protein kinase activity; GO:0016775 phosphotransferase activity, nitrogenous group as acceptor; GO:0004871 signal transducer activity; GO:0009881 photoreceptor activ…	K12120	PHYA; phytochrome A	mdm04712 Circadian rhythm - plant - Malus domestica (apple);	IPR013515; IPR005467; IPR013767; IPR000014; IPR000700; IPR016132; IPR003594; IPR013654; IPR029016; IPR003018;	Phytochrome, central region; Histidine kinase domain; PAS fold; PAS domain; PAS-associated, C-terminal; Phytochrome chromophore attachment domain; Histidine kinase-like ATPase, C-terminal domain; PAS fold-2; GAF domain-like; GAF domain;
RchiOBHm_Chr2g0156661	Putative Heat shock protein Hsp90 family	0.599	Down	0.00086199	---	44	94.795	95	28	23	18	17	19	12	15	14	28	27	26	22	22	25	23	22	21	18	19	21	2156300	1989400	2076300	1190700	1375200	1160300	1.301	1.2	1.252	0.718	0.829	0.7	chloroplast	GO:0006457 protein folding; GO:0006950 response to stress; GO:0050896 response to stimulus; GO:0009987 cellular process;		GO:0005524 ATP binding; GO:1901265 nucleoside phosphate binding; GO:0001882 nucleoside binding; GO:0043167 ion binding; GO:0005515 protein binding; GO:0000166 nucleotide binding; GO:0097159 organic cyclic compound binding; GO:1901363 heterocyclic compound binding; GO:0032549 ribonucleoside binding; GO:0097367 carbohydrate derivative binding; GO:0032553 ribonucleotide binding; GO:0005488 binding; …	K09487	HSP90B, TRA1; heat shock protein 90kDa beta	mdm04141 Protein processing in endoplasmic reticulum - Malus domestica (apple); mdm04626 Plant-pathogen interaction - Malus domestica (apple);	IPR020575; IPR020568; IPR003594;	Heat shock protein Hsp90, N-terminal; Ribosomal protein S5 domain 2-type fold; Histidine kinase-like ATPase, C-terminal domain;
RchiOBHm_Chr2g0157181	PREDICTED: major latex allergen Hev b 5-like [Fragaria vesca subsp. vesca]	0.586	Down	0.00093592	---	14.4	22.138	13	2	2	3	2	2	2	2	2	2	2	2	2	2	2	2	2	2	2	2	2	1014500	1208100	1104000	607210	660780	680160	1.154	1.374	1.256	0.691	0.752	0.774	nucleus
RchiOBHm_Chr2g0158351	Putative nitrate-transporting ATPase	1.613	Up	0.0053213	---	10.5	65.274	10	4	4	1	0	0	3	3	3	3	3	3	4	4	3	3	3	3	4	4	3	54161	64730	56199	100060	100450	81906	0.71	0.849	0.737	1.312	1.317	1.074	plasma membrane	GO:0006810 transport; GO:0051179 localization; GO:0051234 establishment of localization;	GO:0016020 membrane;	GO:0005215 transporter activity;				IPR020846;	Major facilitator superfamily domain;
RchiOBHm_Chr2g0157441	Putative transcription factor bZIP family	0.551	Down	0.0137754	---	10.7	46.973	8	2	2	2	2	2	1	0	1	2	2	2	2	2	2	2	2	2	2	2	2	54482	50777	41281	27283	32063	21422	1.438	1.34	1.09	0.72	0.846	0.565	nucleus	GO:0050794 regulation of cellular process; GO:0010468 regulation of gene expression; GO:0006355 regulation of transcription, DNA-templated; GO:0031326 regulation of cellular biosynthetic process; GO:0080090 regulation of primary metabolic process; GO:0060255 regulation of macromolecule metabolic process; GO:0019219 regulation of nucleobase-containing compound metabolic process; GO:0010556 regulat…		GO:0097159 organic cyclic compound binding; GO:1901363 heterocyclic compound binding; GO:0003677 DNA binding; GO:0005488 binding; GO:0001071 nucleic acid binding transcription factor activity; GO:0003676 nucleic acid binding; GO:0043565 sequence-specific DNA binding; GO:0003700 transcription factor activity, sequence-specific DNA binding;				IPR004827;	Basic-leucine zipper domain;
RchiOBHm_Chr2g0157791	Putative acyl-CoA desaturase	0.564	Down	0.0107048	---	17.9	35.975	11	3	1	1	3	3	1	1	2	1	3	3	3	2	3	0	1	1	1	0	1	0	142400	144920	76677	72386	93819		1.343	1.367	0.723	0.683	0.885	chloroplast	GO:0008152 metabolic process; GO:0055114 oxidation-reduction process; GO:0044710 single-organism metabolic process; GO:0044699 single-organism process; GO:0044238 primary metabolic process; GO:0071704 organic substance metabolic process; GO:0006629 lipid metabolic process;		GO:0016705 oxidoreductase activity, acting on paired donors, with incorporation or reduction of molecular oxygen; GO:0003824 catalytic activity; GO:0016717 oxidoreductase activity, acting on paired donors, with oxidation of a pair of donors resulting in the reduction of molecular oxygen to two molecules of water; GO:0016491 oxidoreductase activity;	K20416	FAD5; palmitoyl-[glycerolipid] 7-desaturase [EC:1.14.19.42]		IPR005804;	Fatty acid desaturase domain;
RchiOBHm_Chr2g0157941	Putative transcription factor C3H family	0.53	Down	0.00034284	---	30.3	47.576	22	7	6	5	3	4	4	4	2	6	7	7	6	7	7	6	6	6	6	6	6	650650	605470	598450	360800	313010	308860	1.376	1.28	1.266	0.763	0.662	0.653	nucleus			GO:0046872 metal ion binding; GO:0043169 cation binding; GO:0005488 binding; GO:0043167 ion binding;				IPR000571;	Zinc finger, CCCH-type;
RchiOBHm_Chr2g0158641	plant/T7A14-6 protein [Medicago truncatula]	0.547	Down	0.0016357	---	36	20.62	21	6	6	5	3	4	3	4	2	5	4	5	5	5	4	5	4	5	5	5	4	310680	258080	323400	170600	166610	150650	1.351	1.122	1.406	0.742	0.724	0.655	extracellular
RchiOBHm_Chr2g0158811	Putative phytepsin	1.536	Up	0.038057	---	38.8	55.383	43	11	11	8	5	5	8	4	13	10	9	10	11	10	11	10	9	10	11	10	11	818080	795740	805380	1068100	1216500	1429600	0.8	0.778	0.788	1.045	1.19	1.399	chloroplast	GO:0008152 metabolic process; GO:0044710 single-organism metabolic process; GO:0044699 single-organism process; GO:0006508 proteolysis; GO:0019538 protein metabolic process; GO:0043170 macromolecule metabolic process; GO:0044238 primary metabolic process; GO:0006629 lipid metabolic process; GO:0071704 organic substance metabolic process;		GO:0004175 endopeptidase activity; GO:0008233 peptidase activity; GO:0003824 catalytic activity; GO:0004190 aspartic-type endopeptidase activity; GO:0070011 peptidase activity, acting on L-amino acid peptides; GO:0016787 hydrolase activity; GO:0070001 aspartic-type peptidase activity;	K08245	E3.4.23.40; phytepsin [EC:3.4.23.40]		IPR033869; IPR008139; IPR011001; IPR033121; IPR021109; IPR007856; IPR008138;	Phytepsin; Saposin B type domain; Saposin-like; Peptidase family A1 domain; Aspartic peptidase domain; Saposin-like type B, region 1; Saposin B type, region 2;
RchiOBHm_Chr2g0158931	Putative B-cell receptor-associated protein 29/31	0.451	Down	0.00073634	---	45.5	25.75	47	10	10	11	7	11	6	6	6	8	8	10	9	9	9	8	8	10	9	9	9	928250	875430	956040	444570	449610	349990	1.391	1.312	1.433	0.666	0.674	0.524	chloroplast	GO:0045184 establishment of protein localization; GO:0006810 transport; GO:0046907 intracellular transport; GO:0070727 cellular macromolecule localization; GO:0051649 establishment of localization in cell; GO:0006886 intracellular protein transport; GO:0071702 organic substance transport; GO:0008104 protein localization; GO:0033036 macromolecule localization; GO:0034613 cellular protein localizat…	GO:0016020 membrane; GO:0043229 intracellular organelle; GO:0005783 endoplasmic reticulum; GO:0005737 cytoplasm; GO:0031224 intrinsic component of membrane; GO:0012505 endomembrane system; GO:0044424 intracellular part; GO:0005623 cell; GO:0016021 integral component of membrane; GO:0043231 intracellular membrane-bounded organelle; GO:0043226 organelle; GO:0005622 intracellular; GO:0044464 cell pa…		K14009	BCAP31, BAP31; B-cell receptor-associated protein 31	mdm04141 Protein processing in endoplasmic reticulum - Malus domestica (apple);
RchiOBHm_Chr2g0161971	Putative polygalacturonate 4-alpha-galacturonosyltransferase	0.621	Down	0.00033976	---	18.1	61.62	33	7	6	6	5	7	5	4	6	7	6	7	6	5	6	6	5	6	6	5	6	199820	182740	174600	112450	116640	116890	1.328	1.214	1.16	0.747	0.775	0.777	mitochondria			GO:0016757 transferase activity, transferring glycosyl groups; GO:0003824 catalytic activity; GO:0016740 transferase activity;	K13648	GAUT; alpha-1,4-galacturonosyltransferase [EC:2.4.1.43]	mdm00520 Amino sugar and nucleotide sugar metabolism - Malus domestica (apple); mdm01100 Metabolic pathways - Malus domestica (apple);	IPR029044;	Nucleotide-diphospho-sugar transferases;
RchiOBHm_Chr2g0162181	Putative protein kinase RLK-Pelle-LRR-V family	0.532	Down	0.0116202	---	5.4	87.712	16	3	3	3	3	2	3	2	3	3	3	3	3	3	3	3	3	3	3	3	3	218200	177930	168100	81778	94629	123890	1.514	1.235	1.167	0.568	0.657	0.86	plasma membrane	GO:0016310 phosphorylation; GO:0044267 cellular protein metabolic process; GO:0044238 primary metabolic process; GO:0044237 cellular metabolic process; GO:0006796 phosphate-containing compound metabolic process; GO:0071704 organic substance metabolic process; GO:0008152 metabolic process; GO:0006468 protein phosphorylation; GO:0006793 phosphorus metabolic process; GO:0044260 cellular macromolecul…		GO:0005524 ATP binding; GO:1901265 nucleoside phosphate binding; GO:0016773 phosphotransferase activity, alcohol group as acceptor; GO:0001882 nucleoside binding; GO:0043167 ion binding; GO:0005515 protein binding; GO:0004672 protein kinase activity; GO:0000166 nucleotide binding; GO:0097159 organic cyclic compound binding; GO:1901363 heterocyclic compound binding; GO:0032549 ribonucleoside bindi…				IPR000719; IPR013210; IPR032675; IPR001245; IPR011009;	Protein kinase domain; Leucine-rich repeat-containing N-terminal, plant-type; Leucine-rich repeat domain, L domain-like; Serine-threonine/tyrosine-protein kinase catalytic domain; Protein kinase-like domain;
RchiOBHm_Chr2g0162201	Putative lipoyl synthase	0.546	Down	0.0172976	---	27.7	41.154	21	6	6	5	3	4	2	4	3	5	3	5	4	6	5	5	3	5	4	6	5	219120	223100	154460	88819	117310	119680	1.425	1.451	1.005	0.578	0.763	0.778	chloroplast	GO:0051188 cofactor biosynthetic process; GO:0016053 organic acid biosynthetic process; GO:0044699 single-organism process; GO:0009058 biosynthetic process; GO:0044255 cellular lipid metabolic process; GO:0044237 cellular metabolic process; GO:0044272 sulfur compound biosynthetic process; GO:0008610 lipid biosynthetic process; GO:0071704 organic substance metabolic process; GO:0008152 metabolic p…	GO:0043226 organelle; GO:0043231 intracellular membrane-bounded organelle; GO:0043229 intracellular organelle; GO:0044464 cell part; GO:0005622 intracellular; GO:0005737 cytoplasm; GO:0044424 intracellular part; GO:0043227 membrane-bounded organelle; GO:0005623 cell; GO:0005739 mitochondrion; GO:0044444 cytoplasmic part;	GO:0016879 ligase activity, forming carbon-nitrogen bonds; GO:0016979 lipoate-protein ligase activity; GO:0070283 radical SAM enzyme activity; GO:0003824 catalytic activity; GO:0005488 binding; GO:0051536 iron-sulfur cluster binding; GO:0016992 lipoate synthase activity; GO:0016874 ligase activity; GO:0016782 transferase activity, transferring sulfur-containing groups; GO:0016783 sulfurtransferas…	K03644	lipA; lipoyl synthase [EC:2.8.1.8]	mdm00785 Lipoic acid metabolism - Malus domestica (apple); mdm01100 Metabolic pathways - Malus domestica (apple);	IPR013785; IPR031691; IPR006638; IPR007197;	Aldolase-type TIM barrel; Lipoyl synthase, N-terminal; Elongator protein 3/MiaB/NifB; Radical SAM;
RchiOBHm_Chr2g0163401	PREDICTED: putative nuclear matrix constituent protein 1-like protein [Fragaria vesca subsp. vesca]	0.378	Down	0.00063851	---	12.7	135.84	32	12	12	8	8	8	2	3	3	10	12	12	6	7	6	10	12	12	6	7	6	356170	386710	463180	142410	171630	141420	1.286	1.396	1.673	0.514	0.62	0.511	chloroplast
RchiOBHm_Chr2g0159131	Putative oxidoreductase	1.579	Up	0.0049039	---	33.9	39.553	47	7	7	7	7	8	9	9	7	6	6	6	7	7	7	6	6	6	7	7	7	1062200	1011700	1053900	1649200	1868000	1423200	0.79	0.752	0.784	1.226	1.389	1.058	cytoplasm	GO:0044699 single-organism process; GO:0008152 metabolic process; GO:0055114 oxidation-reduction process; GO:0044710 single-organism metabolic process;		GO:0003824 catalytic activity; GO:0016491 oxidoreductase activity;				IPR011032; IPR020843; IPR016040; IPR013149;	GroES-like; Polyketide synthase, enoylreductase domain; NAD(P)-binding domain; Alcohol dehydrogenase, C-terminal;
RchiOBHm_Chr2g0164371	Putative Cell morphogenesis protein	0.634	Down	0.0049998	---	6.2	241.54	14	9	9	3	5	2	0	0	4	6	6	5	4	4	6	6	6	5	4	4	6	99977	90658	99227	61172	69320	53271	1.267	1.148	1.257	0.775	0.878	0.675	cytoplasm			GO:0005488 binding;				IPR025481; IPR011989; IPR016024; IPR029473; IPR025614;	Cell morphogenesis protein C-terminal; Armadillo-like helical; Armadillo-type fold; Cell morphogenesis central region; Cell morphogenesis protein N-terminal;
RchiOBHm_Chr2g0160611	Putative xyloglucan:xyloglucosyl transferase	2.044	Up	0.0113829	---	54.8	34.081	59	10	10	5	11	8	11	14	10	9	9	7	8	10	9	9	9	7	8	10	9	339930	446300	369260	718870	1005300	637430	0.58	0.761	0.63	1.226	1.715	1.087	extracellular	GO:0044085 cellular component biogenesis; GO:0006073 cellular glucan metabolic process; GO:0044036 cell wall macromolecule metabolic process; GO:0044042 glucan metabolic process; GO:0005975 carbohydrate metabolic process; GO:0044238 primary metabolic process; GO:0044237 cellular metabolic process; GO:0010410 hemicellulose metabolic process; GO:0044264 cellular polysaccharide metabolic process; GO…	GO:0048046 apoplast; GO:0030312 external encapsulating structure; GO:0044464 cell part; GO:0071944 cell periphery; GO:0005618 cell wall; GO:0005623 cell; GO:0005576 extracellular region;	GO:0016762 xyloglucan:xyloglucosyl transferase activity; GO:0016758 transferase activity, transferring hexosyl groups; GO:0003824 catalytic activity; GO:0016798 hydrolase activity, acting on glycosyl bonds; GO:0004553 hydrolase activity, hydrolyzing O-glycosyl compounds; GO:0016757 transferase activity, transferring glycosyl groups; GO:0016787 hydrolase activity; GO:0016740 transferase activity;	K08235	E2.4.1.207; xyloglucan:xyloglucosyl transferase [EC:2.4.1.207]		IPR010713; IPR013320; IPR000757;	Xyloglucan endo-transglycosylase, C-terminal; Concanavalin A-like lectin/glucanase domain; Glycoside hydrolase family 16;
RchiOBHm_Chr2g0161681	"Putative oligopeptide transporter, OPT superfamily"	3.09	Up	0.0032619	---	15.9	83.025	35	7	4	3	3	3	10	9	7	3	4	6	7	7	6	2	3	3	4	4	3	146110	207850	113750	468220	535450	442100	0.458	0.652	0.357	1.468	1.679	1.386	plasma membrane	GO:0006810 transport; GO:0055085 transmembrane transport; GO:0051179 localization; GO:0051234 establishment of localization;
RchiOBHm_Chr2g0164791	"Putative aminoacyltransferase, E1 ubiquitin-activating enzyme"	0.626	Down	0.000162057	---	25.8	566.34	280	80	78	58	59	57	34	33	39	69	72	73	61	67	62	68	71	72	60	65	60	2933600	3042300	3040100	1898800	1768600	1973400	1.201	1.245	1.245	0.777	0.724	0.808	plasma membrane			GO:0043169 cation binding; GO:0046872 metal ion binding; GO:0008270 zinc ion binding; GO:0046914 transition metal ion binding; GO:0005488 binding; GO:0043167 ion binding;	K10691	UBR4, ZUBR1; E3 ubiquitin-protein ligase UBR4 [EC:2.3.2.27]		IPR011989; IPR016024; IPR000433; IPR003126;	Armadillo-like helical; Armadillo-type fold; Zinc finger, ZZ-type; Zinc finger, UBR-type;
RchiOBHm_Chr2g0165791	"Putative nuclear transport factor 2, nucleotide-binding alpha-beta plait domain, NTF2-like protein"	0.426	Down	0.0018373	---	10.3	57.368	9	4	4	2	3	2	1	1	0	3	4	3	3	4	4	3	4	3	3	4	4	40755	53677	49602	18705	23944	18691	1.191	1.568	1.449	0.546	0.7	0.546	nucleus	GO:0006810 transport; GO:0051179 localization; GO:0051234 establishment of localization;	GO:0005623 cell; GO:0005622 intracellular; GO:0044464 cell part;	GO:0097159 organic cyclic compound binding; GO:1901363 heterocyclic compound binding; GO:1901265 nucleoside phosphate binding; GO:0005488 binding; GO:0003676 nucleic acid binding; GO:0000166 nucleotide binding; GO:0036094 small molecule binding;				IPR002075; IPR018222; IPR000504; IPR012677; IPR032710;	Nuclear transport factor 2; Nuclear transport factor 2, eukaryote; RNA recognition motif domain; Nucleotide-binding alpha-beta plait domain; NTF2-like domain;
RchiOBHm_Chr2g0166331	Putative glycogen phosphorylase	0.485	Down	0.00178181	---	41.2	112.21	111	27	24	26	19	24	14	12	16	25	21	25	24	21	23	23	19	22	22	18	21	2053700	1608400	1897900	951470	961360	784960	1.492	1.169	1.379	0.691	0.699	0.57	cytoplasm	GO:0008152 metabolic process; GO:0005975 carbohydrate metabolic process; GO:0044238 primary metabolic process; GO:0071704 organic substance metabolic process;		GO:0097159 organic cyclic compound binding; GO:1901363 heterocyclic compound binding; GO:0016758 transferase activity, transferring hexosyl groups; GO:0003824 catalytic activity; GO:0005488 binding; GO:0004645 phosphorylase activity; GO:0043167 ion binding; GO:0016757 transferase activity, transferring glycosyl groups; GO:0043168 anion binding; GO:0016740 transferase activity; GO:0048037 cofactor…	K00688	PYG, glgP; glycogen phosphorylase [EC:2.4.1.1]	mdm00500 Starch and sucrose metabolism - Malus domestica (apple); mdm01100 Metabolic pathways - Malus domestica (apple); mdm01110 Biosynthesis of secondary metabolites - Malus domestica (apple);
RchiOBHm_Chr2g0165901	Putative transcription factor WD40-like family	1.914	Up	0.00113561	---	39.8	47.407	23	9	9	3	2	1	4	5	8	6	6	5	6	7	9	6	6	5	6	7	9	136710	109810	110690	234100	213720	235440	0.788	0.633	0.638	1.35	1.232	1.358	nucleus	GO:0044085 cellular component biogenesis; GO:0042254 ribosome biogenesis; GO:0022613 ribonucleoprotein complex biogenesis; GO:0071840 cellular component organization or biogenesis;		GO:0005515 protein binding; GO:0005488 binding;	K14863	YTM1, WDR12; ribosome biogenesis protein YTM1		IPR012972; IPR017986; IPR015943;	NLE; WD40-repeat-containing domain; WD40/YVTN repeat-like-containing domain;
RchiOBHm_Chr2g0167321	"pro-resilin, putative [Medicago truncatula]"	0.522	Down	0.0022965	---	53.2	49.281	80	14	14	15	17	15	9	12	12	13	14	12	11	13	12	13	14	12	11	13	12	2888100	3382800	2895400	1622300	1794200	1370800	1.242	1.455	1.245	0.698	0.771	0.589	nucleus
RchiOBHm_Chr2g0167651	Putative K domain-containing protein	0.609	Down	0.00052032	---	42	58.47	56	12	12	13	11	11	6	10	5	11	11	10	10	11	8	11	11	10	10	11	8	922370	887660	787800	536570	518890	527540	1.324	1.274	1.131	0.77	0.745	0.757	nucleus			GO:0097159 organic cyclic compound binding; GO:1901363 heterocyclic compound binding; GO:0003723 RNA binding; GO:0005488 binding; GO:0003676 nucleic acid binding;	K21444	PCBP3_4; poly(rC)-binding protein 3/4		IPR004087; IPR004088;	K Homology domain; K Homology domain, type 1;
RchiOBHm_Chr2g0170291	"Putative FMN-binding split barrel, cellular repressor of E1A-stimulated genes (CREG)"	1.71	Up	0.0020588	---	20.5	23.012	12	3	3	1	2	2	2	2	3	3	3	3	2	2	3	3	3	3	2	2	3	46562	55745	48015	78796	84205	93879	0.686	0.821	0.707	1.161	1.241	1.383	extracellular	GO:0044699 single-organism process; GO:0008152 metabolic process; GO:0055114 oxidation-reduction process; GO:0044710 single-organism metabolic process;		GO:0097159 organic cyclic compound binding; GO:1901363 heterocyclic compound binding; GO:0097367 carbohydrate derivative binding; GO:1901265 nucleoside phosphate binding; GO:0003824 catalytic activity; GO:0032553 ribonucleotide binding; GO:0005488 binding; GO:0043167 ion binding; GO:0043168 anion binding; GO:0000166 nucleotide binding; GO:0010181 FMN binding; GO:0048037 cofactor binding; GO:00164…				IPR012349;	FMN-binding split barrel;
RchiOBHm_Chr2g0172171	Putative carbonic anhydrase	1.776	Up	0.0021202	---	47.2	34.935	64	9	9	10	9	11	12	11	11	7	7	8	8	8	9	7	7	8	8	8	9	371210	377990	326720	709770	563610	637680	0.746	0.759	0.656	1.426	1.132	1.281	chloroplast	GO:0015976 carbon utilization; GO:0044699 single-organism process;		GO:0046914 transition metal ion binding; GO:0003824 catalytic activity; GO:0005488 binding; GO:0043167 ion binding; GO:0016829 lyase activity; GO:0046872 metal ion binding; GO:0043169 cation binding; GO:0016836 hydro-lyase activity; GO:0008270 zinc ion binding; GO:0004089 carbonate dehydratase activity; GO:0016835 carbon-oxygen lyase activity;	K01673	cynT, can; carbonic anhydrase [EC:4.2.1.1]	mdm00910 Nitrogen metabolism - Malus domestica (apple); mdm01100 Metabolic pathways - Malus domestica (apple);
RchiOBHm_Chr2g0169841	Putative xenobiotic-transporting ATPase	0.548	Down	0.0050563	---	6.9	136.47	20	5	5	5	5	4	2	2	2	5	5	4	4	3	3	5	5	4	4	3	3	137620	123590	153540	88462	65309	73514	1.286	1.155	1.435	0.827	0.61	0.687	plasma membrane	GO:0006810 transport; GO:0055085 transmembrane transport; GO:0051179 localization; GO:0051234 establishment of localization;	GO:0031224 intrinsic component of membrane; GO:0016020 membrane; GO:0016021 integral component of membrane; GO:0044425 membrane part;	GO:1901265 nucleoside phosphate binding; GO:0015399 primary active transmembrane transporter activity; GO:0016817 hydrolase activity, acting on acid anhydrides; GO:0016787 hydrolase activity; GO:0016887 ATPase activity; GO:0097159 organic cyclic compound binding; GO:1901363 heterocyclic compound binding; GO:0016462 pyrophosphatase activity; GO:0003824 catalytic activity; GO:0032553 ribonucleotide…	K05658	ABCB1, CD243; ATP-binding cassette, subfamily B (MDR/TAP), member 1 [EC:3.6.3.44]	mdm02010 ABC transporters - Malus domestica (apple);	IPR003593; IPR003439; IPR027417; IPR011527;	AAA+ ATPase domain; ABC transporter-like; P-loop containing nucleoside triphosphate hydrolase; ABC transporter type 1, transmembrane domain;
RchiOBHm_Chr2g0174431	"Putative amino acid transporter, transmembrane domain-containing protein"	8.593	Up	0.0186232	---	5.3	50.585	7	2	2	0	0	0	2	3	2	2	2	1	2	2	2	2	2	1	2	2	2	4255.5	13225	0	95497	79443	50460	0.088	0.272		1.966	1.635	1.039	plasma membrane							IPR013057;	Amino acid transporter, transmembrane domain;
RchiOBHm_Chr2g0170411	Putative carboxylesterase	0.528	Down	0.0021622	---	24.6	64.567	21	8	8	4	5	6	2	2	2	6	6	8	4	5	5	6	6	8	4	5	5	268410	210800	215140	114720	133660	118220	1.518	1.192	1.217	0.649	0.756	0.669	nucleus	GO:0044699 single-organism process; GO:0008152 metabolic process; GO:0044238 primary metabolic process; GO:0044710 single-organism metabolic process; GO:0006629 lipid metabolic process; GO:0071704 organic substance metabolic process;						IPR002921; IPR029058;	Fungal lipase-like domain; Alpha/Beta hydrolase fold;
RchiOBHm_Chr2g0175251	Putative triacylglycerol lipase	3.292	Up	0.042805	---	25.9	44.573	11	5	5	1	1	1	2	2	4	1	2	2	4	4	4	1	2	2	4	4	4	0	14914	23605	44764	51092	94475		0.326	0.516	0.978	1.116	2.064	chloroplast	GO:0044699 single-organism process; GO:0008152 metabolic process; GO:0044238 primary metabolic process; GO:0044710 single-organism metabolic process; GO:0006629 lipid metabolic process; GO:0071704 organic substance metabolic process;		GO:0016787 hydrolase activity; GO:0003824 catalytic activity; GO:0016788 hydrolase activity, acting on ester bonds;				IPR006693; IPR029058;	Partial AB-hydrolase lipase domain; Alpha/Beta hydrolase fold;
RchiOBHm_Chr2g0170441	"Putative sulfatase, GPI ethanolamine phosphate transferase 1"	0.624	Down	0.0047161	---	4.5	111.69	11	3	3	3	1	2	1	2	2	3	1	3	2	3	3	3	1	3	2	3	3	65543	0	65950	44421	37560	41115	1.287		1.295	0.872	0.738	0.807	plasma membrane	GO:0006506 GPI anchor biosynthetic process; GO:0009247 glycolipid biosynthetic process; GO:1903509 liposaccharide metabolic process; GO:0046486 glycerolipid metabolic process; GO:0006661 phosphatidylinositol biosynthetic process; GO:0006643 membrane lipid metabolic process; GO:0008654 phospholipid biosynthetic process; GO:0044267 cellular protein metabolic process; GO:0044699 single-organism proc…	GO:0016020 membrane; GO:0043229 intracellular organelle; GO:0005783 endoplasmic reticulum; GO:0042175 nuclear outer membrane-endoplasmic reticulum membrane network; GO:0005737 cytoplasm; GO:0044446 intracellular organelle part; GO:0012505 endomembrane system; GO:0044424 intracellular part; GO:0005623 cell; GO:0044422 organelle part; GO:0043231 intracellular membrane-bounded organelle; GO:0043226 …	GO:0016787 hydrolase activity; GO:0008484 sulfuric ester hydrolase activity; GO:0016740 transferase activity; GO:0003824 catalytic activity; GO:0016788 hydrolase activity, acting on ester bonds;	K05285	PIGN; phosphatidylinositol glycan, class N [EC:2.7.-.-]	mdm00563 Glycosylphosphatidylinositol (GPI)-anchor biosynthesis - Malus domestica (apple); mdm01100 Metabolic pathways - Malus domestica (apple);	IPR017852; IPR017849; IPR017850; IPR000917;	GPI ethanolamine phosphate transferase 1, C-terminal; Alkaline phosphatase-like, alpha/beta/alpha; Alkaline-phosphatase-like, core domain; Sulfatase, N-terminal;
RchiOBHm_Chr3g0447661	Putative glutamine--fructose-6-phosphate transaminase (isomerizing)	1.665	Up	0.031125	---	25.6	83.411	35	14	13	2	3	5	11	5	9	9	7	12	13	9	12	8	7	11	12	8	11	146340	126030	176460	305320	240220	201460	0.734	0.632	0.885	1.532	1.205	1.011	chloroplast	GO:0008152 metabolic process; GO:0005975 carbohydrate metabolic process; GO:0044238 primary metabolic process; GO:0071704 organic substance metabolic process;		GO:0030246 carbohydrate binding; GO:0005488 binding;	K00820	glmS, GFPT; glucosamine---fructose-6-phosphate aminotransferase (isomerizing) [EC:2.6.1.16]	mdm00250 Alanine, aspartate and glutamate metabolism - Malus domestica (apple); mdm00520 Amino sugar and nucleotide sugar metabolism - Malus domestica (apple); mdm01100 Metabolic pathways - Malus domestica (apple);	IPR029055; IPR001347; IPR017932;	Nucleophile aminohydrolases, N-terminal; Sugar isomerase (SIS); Glutamine amidotransferase type 2 domain;
RchiOBHm_Chr2g0171051	aminopeptidase (DUF3754) [Arabidopsis thaliana]	0.562	Down	0.0146408	---	34.5	57.075	42	11	11	9	10	9	7	3	4	11	11	11	10	10	8	11	11	11	10	10	8	868090	799090	988380	384960	507180	598950	1.256	1.156	1.43	0.557	0.734	0.867	plasma membrane
RchiOBHm_Chr3g0449941	Putative protein-serine/threonine phosphatase	1.535	Up	0.0074167	---	40.9	38.074	23	9	5	4	3	4	5	3	4	7	6	8	9	8	9	4	3	5	5	5	5	136650	132160	161680	196600	240020	223960	0.751	0.727	0.889	1.081	1.32	1.232	cytoplasm			GO:0016787 hydrolase activity; GO:0003824 catalytic activity;	K06269	PPP1C; serine/threonine-protein phosphatase PP1 catalytic subunit [EC:3.1.3.16]	mdm03015 mRNA surveillance pathway - Malus domestica (apple);	IPR029052; IPR004843; IPR031675; IPR006186;	Metallo-dependent phosphatase-like; Calcineurin-like phosphoesterase domain, ApaH type; Serine-threonine protein phosphatase, N-terminal; Serine/threonine-specific protein phosphatase/bis(5-nucleosyl)-tetraphosphatase;
RchiOBHm_Chr2g0171061	Putative CLASP domain-containing protein	0.604	Down	0.00198382	---	23.9	36.312	29	6	6	6	6	4	5	4	4	6	6	5	6	6	5	6	6	5	6	6	5	629000	654870	588600	386690	332200	411600	1.257	1.308	1.176	0.773	0.664	0.822	cytoplasm			GO:0005488 binding;				IPR034085; IPR011989; IPR024395; IPR016024;	TOG domain; Armadillo-like helical; CLASP N-terminal domain; Armadillo-type fold;
RchiOBHm_Chr3g0454041	"Putative cation/H+ exchanger, cation/H+ exchanger, CPA1 family"	2.637	Up	0.00158363	---	6.3	59.687	8	2	2	0	1	0	3	3	1	2	2	2	2	2	2	2	2	2	2	2	2	25373	17840	22818	61852	62559	49819	0.634	0.446	0.57	1.545	1.562	1.244	plasma membrane	GO:0055067 monovalent inorganic cation homeostasis; GO:0065008 regulation of biological quality; GO:0006885 regulation of pH; GO:0050801 ion homeostasis; GO:0030001 metal ion transport; GO:0098771 inorganic ion homeostasis; GO:0006814 sodium ion transport; GO:0051234 establishment of localization; GO:0006810 transport; GO:0055085 transmembrane transport; GO:0042592 homeostatic process; GO:0055080…	GO:0031224 intrinsic component of membrane; GO:0016020 membrane; GO:0016021 integral component of membrane; GO:0044425 membrane part;	GO:0015298 solute:cation antiporter activity; GO:0022804 active transmembrane transporter activity; GO:0015291 secondary active transmembrane transporter activity; GO:0015075 ion transmembrane transporter activity; GO:0015299 solute:proton antiporter activity; GO:0022892 substrate-specific transporter activity; GO:0015077 monovalent inorganic cation transmembrane transporter activity; GO:0015078 …				IPR006153;	Cation/H+ exchanger;
RchiOBHm_Chr2g0172331	Putative transcription factor MYB-HB-like family	0.401	Down	0.0060176	---	8.7	23.367	17	2	2	4	4	2	2	3	2	2	2	2	2	2	2	2	2	2	2	2	2	336040	244340	220930	132910	91486	97124	1.796	1.306	1.181	0.71	0.489	0.519	nucleus			GO:0097159 organic cyclic compound binding; GO:1901363 heterocyclic compound binding; GO:0003677 DNA binding; GO:0005488 binding; GO:0003676 nucleic acid binding;	K09422	MYBP; transcription factor MYB, plant		IPR001005; IPR009057; IPR017930;	SANT/Myb domain; Homeobox domain-like; Myb domain;
RchiOBHm_Chr3g0455691	Putative rubber elongation factor	1.501	Up	0.049002	---	20.3	24.598	7	3	2	1	1	1	2	1	1	3	3	2	2	2	3	2	2	2	2	2	2	37054	33304	29219	62749	42648	44062	0.893	0.802	0.704	1.512	1.028	1.062	chloroplast
RchiOBHm_Chr2g0172841	PREDICTED: titin isoform X2 [Fragaria vesca subsp. vesca]	0.661	Down	0.0055037	---	21.9	323.1	114	36	31	21	27	23	11	18	14	31	35	31	25	28	25	26	30	27	20	24	20	765890	905580	778150	522760	597750	499420	1.129	1.335	1.147	0.771	0.881	0.736	nucleus
RchiOBHm_Chr2g0172861	PREDICTED: titin isoform X2 [Fragaria vesca subsp. vesca]	0.567	Down	0.0045151	---	17	234.57	49	23	18	10	10	11	6	6	6	18	19	20	16	17	18	13	14	16	11	13	13	476710	463530	499770	297270	297420	221960	1.267	1.232	1.329	0.79	0.791	0.59	nucleus
RchiOBHm_Chr3g0457611	Putative NAD(P)-binding domain-containing protein	1.651	Up	0.0066172	---	37.4	42.336	42	10	10	7	5	5	8	9	8	10	9	10	9	10	9	10	9	10	9	10	9	342800	297020	247140	513800	469450	481270	0.875	0.758	0.631	1.311	1.198	1.228	chloroplast			GO:0048037 cofactor binding; GO:0003824 catalytic activity; GO:0005488 binding; GO:0050662 coenzyme binding;				IPR001509; IPR016040;	NAD-dependent epimerase/dehydratase; NAD(P)-binding domain;
RchiOBHm_Chr3g0458761	Putative pectinacetylesterase/NOTUM	2.548	Up	0.00161559	---	59.2	46.172	57	15	15	7	9	6	11	13	11	11	13	12	12	14	13	11	13	12	12	14	13	383430	417720	369440	1082000	1122300	778940	0.554	0.603	0.534	1.563	1.621	1.125	extracellular			GO:0016787 hydrolase activity; GO:0003824 catalytic activity;
RchiOBHm_Chr2g0173611	"Putative serine aminopeptidase, S33, alpha/Beta hydrolase"	0.509	Down	0.0133245	---	19.6	42.12	18	4	4	4	4	2	1	2	5	3	3	3	3	3	4	3	3	3	3	3	4	161230	194790	120730	75413	74453	92861	1.345	1.624	1.007	0.629	0.621	0.774	nucleus				K01076			IPR029058; IPR022742;	Alpha/Beta hydrolase fold; Serine aminopeptidase, S33;
RchiOBHm_Chr2g0174121	"Putative GPI inositol-deacylase PGAP1, alpha/Beta hydrolase"	0.654	Down	0.0039441	---	10.9	123.87	29	7	6	5	4	6	4	5	5	6	6	6	7	7	6	5	6	5	6	6	6	292530	326580	306820	189490	187510	228400	1.146	1.28	1.202	0.742	0.735	0.895	plasma membrane			GO:0016787 hydrolase activity; GO:0003824 catalytic activity; GO:0016788 hydrolase activity, acting on ester bonds;	K05294	PGAP1; glycosylphosphatidylinositol deacylase [EC:3.-.-.-]	mdm00563 Glycosylphosphatidylinositol (GPI)-anchor biosynthesis - Malus domestica (apple); mdm01100 Metabolic pathways - Malus domestica (apple);	IPR029058;	Alpha/Beta hydrolase fold;
RchiOBHm_Chr2g0174941	Putative protoporphyrinogen oxidase	0.509	Down	0.0071359	---	19.1	55.547	11	6	6	3	3	3	1	1	0	5	6	5	4	5	4	5	6	5	4	5	4	98596	70161	64994	41212	38395	39417	1.677	1.193	1.105	0.701	0.653	0.67	nucleus	GO:0051188 cofactor biosynthetic process; GO:0018130 heterocycle biosynthetic process; GO:0006725 cellular aromatic compound metabolic process; GO:0055114 oxidation-reduction process; GO:0006779 porphyrin-containing compound biosynthetic process; GO:1901360 organic cyclic compound metabolic process; GO:0044699 single-organism process; GO:0006807 nitrogen compound metabolic process; GO:0009058 bio…		GO:0016627 oxidoreductase activity, acting on the CH-CH group of donors; GO:0016634 oxidoreductase activity, acting on the CH-CH group of donors, oxygen as acceptor; GO:0003824 catalytic activity; GO:0070818 protoporphyrinogen oxidase activity; GO:0004729 oxygen-dependent protoporphyrinogen oxidase activity; GO:0016491 oxidoreductase activity;	K00231	PPOX, hemY; protoporphyrinogen/coproporphyrinogen III oxidase [EC:1.3.3.4 1.3.3.15]	mdm00860 Porphyrin and chlorophyll metabolism - Malus domestica (apple); mdm01100 Metabolic pathways - Malus domestica (apple); mdm01110 Biosynthesis of secondary metabolites - Malus domestica (apple);	IPR002937; IPR027418; IPR023753;	Amine oxidase; Protoporphyrinogen oxidase, C-terminal domain; FAD/NAD(P)-binding domain;
RchiOBHm_Chr3g0447951	Putative Gdt1 family protein	0.617	Down	0.00137524	---	20.1	30.403	15	3	3	3	3	3	2	2	2	3	3	3	2	2	3	3	3	3	2	2	3	111950	125150	134310	79320	77724	71980	1.119	1.251	1.342	0.793	0.777	0.719	plasma membrane
RchiOBHm_Chr3g0459271	Putative protein kinase RLK-Pelle-LRR-VIII-1 family	3.274	Up	0.0003839	---	16.6	104.07	29	9	9	3	1	4	9	7	5	6	4	5	9	8	8	6	4	5	9	8	8	130210	164980	158300	538600	524810	419850	0.403	0.511	0.49	1.669	1.626	1.301	plasma membrane	GO:0016310 phosphorylation; GO:0044267 cellular protein metabolic process; GO:0044238 primary metabolic process; GO:0044237 cellular metabolic process; GO:0006796 phosphate-containing compound metabolic process; GO:0071704 organic substance metabolic process; GO:0008152 metabolic process; GO:0006468 protein phosphorylation; GO:0006793 phosphorus metabolic process; GO:0044260 cellular macromolecul…		GO:0005524 ATP binding; GO:1901265 nucleoside phosphate binding; GO:0016773 phosphotransferase activity, alcohol group as acceptor; GO:0001882 nucleoside binding; GO:0043167 ion binding; GO:0005515 protein binding; GO:0004672 protein kinase activity; GO:0000166 nucleotide binding; GO:0097159 organic cyclic compound binding; GO:1901363 heterocyclic compound binding; GO:0032549 ribonucleoside bindi…				IPR000719; IPR013210; IPR001245; IPR032675; IPR013320; IPR011009;	Protein kinase domain; Leucine-rich repeat-containing N-terminal, plant-type; Serine-threonine/tyrosine-protein kinase catalytic domain; Leucine-rich repeat domain, L domain-like; Concanavalin A-like lectin/glucanase domain; Protein kinase-like domain;
RchiOBHm_Chr3g0448281	Putative transcription factor WD40-like family	0.629	Down	0.0043246	---	48.1	82.604	182	34	34	33	30	31	29	30	29	32	33	32	32	32	30	32	33	32	32	32	30	5188800	5002100	5376300	3426000	3577600	2779200	1.228	1.184	1.272	0.811	0.847	0.658	chloroplast	GO:0006518 peptide metabolic process; GO:0043043 peptide biosynthetic process; GO:0044267 cellular protein metabolic process; GO:0006807 nitrogen compound metabolic process; GO:0009058 biosynthetic process; GO:0043603 cellular amide metabolic process; GO:0044238 primary metabolic process; GO:1901566 organonitrogen compound biosynthetic process; GO:0044237 cellular metabolic process; GO:1901576 or…	GO:0044464 cell part; GO:0005622 intracellular; GO:0005737 cytoplasm; GO:0032991 macromolecular complex; GO:0044424 intracellular part; GO:0043234 protein complex; GO:0005623 cell; GO:0044444 cytoplasmic part; GO:0005852 eukaryotic translation initiation factor 3 complex;	GO:0097159 organic cyclic compound binding; GO:1901363 heterocyclic compound binding; GO:0008135 translation factor activity, RNA binding; GO:0003723 RNA binding; GO:1901265 nucleoside phosphate binding; GO:0031369 translation initiation factor binding; GO:0005488 binding; GO:0003676 nucleic acid binding; GO:0003743 translation initiation factor activity; GO:0005515 protein binding; GO:0000166 nu…	K03253	EIF3B; translation initiation factor 3 subunit B	mdm03013 RNA transport - Malus domestica (apple);	IPR000504; IPR013979; IPR012677; IPR015943; IPR011042; IPR034363;	RNA recognition motif domain; Translation initiation factor, beta propellor-like domain; Nucleotide-binding alpha-beta plait domain; WD40/YVTN repeat-like-containing domain; Six-bladed beta-propeller, TolB-like; eIF3B, RNA recognition motif;
RchiOBHm_Chr3g0448711	DNA-directed RNA polymerase subunit alpha [Arabidopsis thaliana]	0.584	Down	9.9763e-05	---	27.1	45.893	37	8	4	7	8	7	5	4	6	8	7	7	6	6	7	4	3	4	3	3	3	421820	420260	431050	263260	246460	234200	1.255	1.25	1.282	0.783	0.733	0.697	nucleus
RchiOBHm_Chr3g0460081	Putative H(+)-transporting two-sector ATPase	1.551	Up	0.0097403	---	36.9	25.764	14	7	4	2	1	2	3	3	3	6	5	6	6	7	6	3	2	3	4	4	3	63539	65853	54875	86541	89191	110030	0.811	0.841	0.7	1.105	1.139	1.405	cytoplasm	GO:0098655 cation transmembrane transport; GO:0034220 ion transmembrane transport; GO:0098660 inorganic ion transmembrane transport; GO:0090662 ATP hydrolysis coupled transmembrane transport; GO:0015988 energy coupled proton transmembrane transport, against electrochemical gradient; GO:0044699 single-organism process; GO:0006818 hydrogen transport; GO:0015992 proton transport; GO:0051234 establis…	GO:0032991 macromolecular complex; GO:0016020 membrane; GO:0033178 proton-transporting two-sector ATPase complex, catalytic domain; GO:0043234 protein complex; GO:0098796 membrane protein complex; GO:0044425 membrane part; GO:0016469 proton-transporting two-sector ATPase complex;	GO:0022804 active transmembrane transporter activity; GO:0042625 ATPase coupled ion transmembrane transporter activity; GO:0015075 ion transmembrane transporter activity; GO:0022853 active ion transmembrane transporter activity; GO:0015399 primary active transmembrane transporter activity; GO:0022892 substrate-specific transporter activity; GO:0044769 ATPase activity, coupled to transmembrane mov…	K02150	ATPeV1E, ATP6E; V-type H+-transporting ATPase subunit E	mdm00190 Oxidative phosphorylation - Malus domestica (apple); mdm01100 Metabolic pathways - Malus domestica (apple); mdm04145 Phagosome - Malus domestica (apple);
RchiOBHm_Chr3g0450031	"PREDICTED: rubisco accumulation factor 1, chloroplastic [Prunus mume]"	0.592	Down	0.0143393	---	30.7	36.21	31	6	6	5	6	5	6	4	5	5	5	5	6	6	6	5	5	5	6	6	6	409770	368190	378640	283860	216720	184100	1.335	1.2	1.234	0.925	0.706	0.6	cytoplasm
RchiOBHm_Chr3g0453131	"Putative shikimate dehydrogenase, 3-dehydroquinate dehydratase"	0.664	Down	0.0129555	---	66.6	57.624	152	29	27	31	26	26	23	23	23	27	27	27	27	25	25	26	26	26	25	24	24	4417200	4458100	4502300	3182600	2705900	2989300	1.191	1.202	1.214	0.858	0.73	0.806	cytoplasm	GO:0008152 metabolic process; GO:1901615 organic hydroxy compound metabolic process; GO:0055114 oxidation-reduction process; GO:0044710 single-organism metabolic process; GO:0019632 shikimate metabolic process; GO:0044281 small molecule metabolic process; GO:0019752 carboxylic acid metabolic process; GO:0044763 single-organism cellular process; GO:0032787 monocarboxylic acid metabolic process; GO…		GO:1901265 nucleoside phosphate binding; GO:0016829 lyase activity; GO:0016836 hydro-lyase activity; GO:0000166 nucleotide binding; GO:0048037 cofactor binding; GO:0016835 carbon-oxygen lyase activity; GO:0016491 oxidoreductase activity; GO:0003855 3-dehydroquinate dehydratase activity; GO:1901363 heterocyclic compound binding; GO:0097159 organic cyclic compound binding; GO:0016614 oxidoreductase…	K13832	aroDE, DHQ-SDH; 3-dehydroquinate dehydratase / shikimate dehydrogenase [EC:4.2.1.10 1.1.1.25]	mdm00400 Phenylalanine, tyrosine and tryptophan biosynthesis - Malus domestica (apple); mdm01100 Metabolic pathways - Malus domestica (apple); mdm01110 Biosynthesis of secondary metabolites - Malus domestica (apple); mdm01230 Biosynthesis of amino acids - Malus domestica (apple);	IPR006151; IPR013785; IPR016040; IPR013708;	Quinate/shikimate 5-dehydrogenase/glutamyl-tRNA reductase; Aldolase-type TIM barrel; NAD(P)-binding domain; Shikimate dehydrogenase substrate binding, N-terminal;
RchiOBHm_Chr3g0460591	Putative plant lipid transfer protein/Par allergen	1.655	Up	0.0077159	---	56.4	11.656	23	6	4	3	3	3	4	5	5	6	6	6	6	6	6	4	4	4	4	4	4	773590	742170	583100	1204400	1230400	1040500	0.833	0.799	0.628	1.296	1.324	1.12	extracellular	GO:0006810 transport; GO:0006869 lipid transport; GO:1902578 single-organism localization; GO:0044699 single-organism process; GO:0010876 lipid localization; GO:0071702 organic substance transport; GO:0033036 macromolecule localization; GO:0051179 localization; GO:0044765 single-organism transport; GO:0051234 establishment of localization;		GO:0008289 lipid binding; GO:0005488 binding;				IPR016140;	Bifunctional inhibitor/plant lipid transfer protein/seed storage helical domain;
RchiOBHm_Chr3g0462271	Putative importin subunit beta-1	1.846	Up	0.000124701	---	35.1	97.015	84	19	19	9	11	10	20	17	17	15	16	14	17	16	15	15	16	14	17	16	15	765580	852420	747280	1485500	1428400	1451500	0.682	0.76	0.666	1.324	1.273	1.294	chloroplast	GO:0045184 establishment of protein localization; GO:0006810 transport; GO:0046907 intracellular transport; GO:0070727 cellular macromolecule localization; GO:0051649 establishment of localization in cell; GO:0006886 intracellular protein transport; GO:0071702 organic substance transport; GO:0008104 protein localization; GO:0033036 macromolecule localization; GO:0034613 cellular protein localizat…		GO:0031267 small GTPase binding; GO:0017016 Ras GTPase binding; GO:0005488 binding; GO:0005515 protein binding; GO:0008536 Ran GTPase binding; GO:0051020 GTPase binding; GO:0019899 enzyme binding;	K14293	KPNB1, IPO1; importin subunit beta-1	mdm03013 RNA transport - Malus domestica (apple);	IPR001494; IPR011989; IPR016024;	Importin-beta, N-terminal domain; Armadillo-like helical; Armadillo-type fold;
RchiOBHm_Chr3g0456861	Putative protein disulfide-isomerase	0.492	Down	0.00069723	---	49.4	39.681	98	17	17	18	21	18	14	16	11	16	16	15	15	16	14	16	16	15	15	16	14	9630300	9924400	8868100	4739600	5148900	4093100	1.363	1.404	1.255	0.671	0.729	0.579	extracellular	GO:0050794 regulation of cellular process; GO:0042592 homeostatic process; GO:0065008 regulation of biological quality; GO:0050789 regulation of biological process; GO:0045454 cell redox homeostasis; GO:0044763 single-organism cellular process; GO:0019725 cellular homeostasis; GO:0044699 single-organism process; GO:0009987 cellular process; GO:0065007 biological regulation;	GO:0043226 organelle; GO:0043231 intracellular membrane-bounded organelle; GO:0043229 intracellular organelle; GO:0005783 endoplasmic reticulum; GO:0044464 cell part; GO:0005622 intracellular; GO:0005737 cytoplasm; GO:0012505 endomembrane system; GO:0044424 intracellular part; GO:0043227 membrane-bounded organelle; GO:0005623 cell; GO:0044444 cytoplasmic part;	GO:0016853 isomerase activity; GO:0003824 catalytic activity;	K09584	PDIA6, TXNDC7; protein disulfide-isomerase A6 [EC:5.3.4.1]	mdm04141 Protein processing in endoplasmic reticulum - Malus domestica (apple);	IPR005788; IPR013766; IPR011679; IPR012336;	Disulphide isomerase; Thioredoxin domain; Endoplasmic reticulum, protein ERp29, C-terminal; Thioredoxin-like fold;
RchiOBHm_Chr3g0463251	Putative signal peptidase I	1.673	Up	0.029637	---	9.6	18.364	8	1	1	1	1	1	1	2	2	1	1	1	1	1	1	1	1	1	1	1	1	13416	12071	11969	0	17566	24210	0.847	0.762	0.755		1.109	1.528	chloroplast	GO:0006508 proteolysis; GO:0008152 metabolic process; GO:0043170 macromolecule metabolic process; GO:0019538 protein metabolic process; GO:0044238 primary metabolic process; GO:0071704 organic substance metabolic process;	GO:0031224 intrinsic component of membrane; GO:0016020 membrane; GO:0016021 integral component of membrane; GO:0044425 membrane part;	GO:0070011 peptidase activity, acting on L-amino acid peptides; GO:0016787 hydrolase activity; GO:0008233 peptidase activity; GO:0003824 catalytic activity; GO:0017171 serine hydrolase activity; GO:0008236 serine-type peptidase activity;	K09648	IMP2; mitochondrial inner membrane protease subunit 2 [EC:3.4.21.-]	mdm03060 Protein export - Malus domestica (apple);	IPR019759; IPR015927; IPR028360;	Peptidase S24/S26A/S26B; Peptidase S24/S26A/S26B/S26C; Peptidase S24/S26, beta-ribbon domain;
RchiOBHm_Chr3g0458711	PREDICTED: triadin-like isoform X2 [Prunus mume]	0.531	Down	0.0103633	---	23.8	94.619	68	16	16	14	16	12	10	11	5	16	16	14	12	13	11	16	16	14	12	13	11	481280	633840	497060	304970	324030	227490	1.17	1.541	1.208	0.741	0.788	0.553	cytoplasm
RchiOBHm_Chr3g0459021	"Putative phytochrome, histidine kinase domain, GAF domain-containing protein"	0.105	Down	2.7415e-06	---	28	124.29	58	20	20	17	20	20	0	1	0	19	20	19	11	10	9	19	20	19	11	10	9	671580	840040	793230	83222	77968	80965	1.582	1.979	1.869	0.196	0.184	0.191	chloroplast	GO:0050794 regulation of cellular process; GO:0044700 single organism signaling; GO:0009581 detection of external stimulus; GO:0009628 response to abiotic stimulus; GO:0060255 regulation of macromolecule metabolic process; GO:0019219 regulation of nucleobase-containing compound metabolic process; GO:0044267 cellular protein metabolic process; GO:0017006 protein-tetrapyrrole linkage; GO:0044699 si…		GO:0038023 signaling receptor activity; GO:0016773 phosphotransferase activity, alcohol group as acceptor; GO:0004673 protein histidine kinase activity; GO:0046983 protein dimerization activity; GO:0005515 protein binding; GO:0004672 protein kinase activity; GO:0016775 phosphotransferase activity, nitrogenous group as acceptor; GO:0004871 signal transducer activity; GO:0009881 photoreceptor activ…	K12120	PHYA; phytochrome A	mdm04712 Circadian rhythm - plant - Malus domestica (apple);	IPR013515; IPR005467; IPR013767; IPR000014; IPR016132; IPR003594; IPR013654; IPR029016; IPR003661; IPR003018;	Phytochrome, central region; Histidine kinase domain; PAS fold; PAS domain; Phytochrome chromophore attachment domain; Histidine kinase-like ATPase, C-terminal domain; PAS fold-2; GAF domain-like; Signal transduction histidine kinase, dimerisation/phosphoacceptor domain; GAF domain;
RchiOBHm_Chr3g0464511	Putative universal stress protein A	2.734	Up	0.003639	---	73.9	17.966	35	12	12	7	5	4	4	7	8	11	9	10	10	10	9	11	9	10	10	10	9	202570	207060	134840	525710	550950	411250	0.598	0.611	0.398	1.552	1.627	1.214	cytoplasm	GO:0006950 response to stress; GO:0050896 response to stimulus;						IPR014729; IPR006016;	Rossmann-like alpha/beta/alpha sandwich fold; UspA;
RchiOBHm_Chr3g0459321	Putative ethanolamine-phosphate cytidylyltransferase	0.639	Down	0.0068798	---	33.9	49.168	48	9	8	10	9	10	7	6	6	9	9	9	9	8	7	8	8	8	8	7	6	675460	524100	524430	375470	369880	355290	1.435	1.113	1.114	0.798	0.786	0.755	chloroplast	GO:0009058 biosynthetic process; GO:0008152 metabolic process;		GO:0003824 catalytic activity;	K00967	PCYT2; ethanolamine-phosphate cytidylyltransferase [EC:2.7.7.14]	mdm00440 Phosphonate and phosphinate metabolism - Malus domestica (apple); mdm00564 Glycerophospholipid metabolism - Malus domestica (apple); mdm01100 Metabolic pathways - Malus domestica (apple);	IPR014729; IPR004821;	Rossmann-like alpha/beta/alpha sandwich fold; Cytidyltransferase-like domain;
RchiOBHm_Chr3g0465491	Putative oxidoreductase	3.717	Up	0.00158016	---	40.1	27.99	25	5	5	3	2	2	7	6	5	5	5	4	5	4	5	5	5	4	5	4	5	125560	76012	76837	326610	384970	322980	0.574	0.347	0.351	1.493	1.759	1.476	nucleus			GO:0003824 catalytic activity; GO:0016491 oxidoreductase activity;	K08081	TR1; tropinone reductase I [EC:1.1.1.206]	mdm00960 Tropane, piperidine and pyridine alkaloid biosynthesis - Malus domestica (apple); mdm01100 Metabolic pathways - Malus domestica (apple); mdm01110 Biosynthesis of secondary metabolites - Malus domestica (apple);	IPR016040;	NAD(P)-binding domain;
RchiOBHm_Chr3g0460421	"Putative EGF-like calcium-binding domain, PA domain, thioredoxin-like protein"	0.619	Down	0.00029876	---	51.8	69.749	81	21	21	13	16	15	13	12	12	18	19	19	18	17	15	18	19	19	18	17	15	1414200	1287500	1386500	867680	867280	795540	1.282	1.167	1.257	0.787	0.786	0.721	plasma membrane			GO:0043169 cation binding; GO:0046872 metal ion binding; GO:0005509 calcium ion binding; GO:0005488 binding; GO:0043167 ion binding;				IPR003137; IPR001881; IPR012336;	PA domain; EGF-like calcium-binding domain; Thioredoxin-like fold;
RchiOBHm_Chr3g0461841	"PREDICTED: LOW QUALITY PROTEIN: protein TIC 56, chloroplastic [Fragaria vesca subsp. vesca]"	0.521	Down	0.0021408	---	13.1	60.688	13	5	5	5	4	2	1	0	1	5	5	4	4	3	3	5	5	4	4	3	3	76296	69262	62644	41353	32272	34818	1.446	1.312	1.187	0.784	0.612	0.66	chloroplast							IPR025640;	Domain of unknown function DUF4339;
RchiOBHm_Chr3g0470941	Putative expansin/Lol pI	13.153	Up	0.00183595	---	30.6	29.434	16	6	6	1	1	0	6	3	5	2	3	2	6	5	5	2	3	2	6	5	5	34301	19297	17760	367110	167750	404630	0.204	0.115	0.105	2.179	0.996	2.402	extracellular	GO:0071554 cell wall organization or biogenesis; GO:0009664 plant-type cell wall organization; GO:0016043 cellular component organization; GO:0071555 cell wall organization; GO:0045229 external encapsulating structure organization; GO:0009987 cellular process; GO:0071669 plant-type cell wall organization or biogenesis; GO:0071840 cellular component organization or biogenesis;	GO:0005576 extracellular region;					IPR009009; IPR007112; IPR007117;	RlpA-like protein, double-psi beta-barrel domain; Expansin/pollen allergen, DPBB domain; Expansin, cellulose-binding-like domain;
RchiOBHm_Chr3g0473811	Putative SOUL heme-binding protein	1.531	Up	0.0160012	---	14.5	33.457	17	3	3	3	3	2	3	3	3	3	3	3	3	3	3	3	3	3	3	3	3	56402	54571	68059	95026	101480	77618	0.747	0.723	0.901	1.258	1.344	1.028	chloroplast							IPR011256;	Regulatory factor, effector binding domain;
RchiOBHm_Chr3g0475681	"Putative Late embryogenesis abundant protein, LEA-14"	1.978	Up	0.0128185	---	16.2	23.733	13	3	3	2	2	1	2	4	2	3	3	3	3	3	3	3	3	3	3	3	3	346920	305080	229610	603900	669330	471310	0.793	0.697	0.525	1.38	1.529	1.077	cytoplasm							IPR004864;	Late embryogenesis abundant protein, LEA-14;
RchiOBHm_Chr3g0479691	Putative DNA-directed DNA polymerase	2.053	Up	0.024603	---	9.9	48.89	12	3	3	1	1	2	2	2	4	2	3	3	2	2	3	2	3	3	2	2	3	23695	17805	33936	45607	62469	46951	0.617	0.464	0.884	1.187	1.626	1.222	cytoplasm	GO:0006260 DNA replication; GO:0006725 cellular aromatic compound metabolic process; GO:0006259 DNA metabolic process; GO:1901360 organic cyclic compound metabolic process; GO:0006807 nitrogen compound metabolic process; GO:0009058 biosynthetic process; GO:0044238 primary metabolic process; GO:1901576 organic substance biosynthetic process; GO:0044237 cellular metabolic process; GO:0044249 cellul…		GO:0097159 organic cyclic compound binding; GO:1901363 heterocyclic compound binding; GO:0003677 DNA binding; GO:0016779 nucleotidyltransferase activity; GO:0003824 catalytic activity; GO:0005488 binding; GO:0003676 nucleic acid binding; GO:0034061 DNA polymerase activity; GO:0003887 DNA-directed DNA polymerase activity; GO:0016740 transferase activity; GO:0016772 transferase activity, transferri…	K02328	POLD2; DNA polymerase delta subunit 2	mdm03030 DNA replication - Malus domestica (apple); mdm03410 Base excision repair - Malus domestica (apple); mdm03420 Nucleotide excision repair - Malus domestica (apple); mdm03430 Mismatch repair - Malus domestica (apple); mdm03440 Homologous recombination - Malus domestica (apple);	IPR007185;	DNA polymerase alpha/epsilon, subunit B;
RchiOBHm_Chr3g0462961	Putative anthocyanidin synthase	0.195	Down	0.036439	---	35.7	40.791	23	8	8	6	5	6	3	1	2	8	8	8	5	4	3	8	8	8	5	4	3	426760	508780	466720	119110	42270	111640	1.528	1.822	1.672	0.427	0.151	0.4	chloroplast	GO:0044699 single-organism process; GO:0008152 metabolic process; GO:0055114 oxidation-reduction process; GO:0044710 single-organism metabolic process;		GO:0003824 catalytic activity; GO:0016491 oxidoreductase activity;				IPR027443; IPR005123; IPR026992;	Isopenicillin N synthase-like; Oxoglutarate/iron-dependent dioxygenase; Non-haem dioxygenase N-terminal domain;
RchiOBHm_Chr3g0481621	"Putative galactinol--sucrose galactosyltransferase, Alpha-galactosidase"	2.261	Up	0.0053831	---	41.7	83.951	74	20	20	10	8	9	16	16	15	16	15	16	19	19	19	16	15	16	19	19	19	1251600	1181300	1288000	2513500	3627300	2265500	0.619	0.584	0.637	1.244	1.795	1.121	chloroplast			GO:0003824 catalytic activity;	K06617	E2.4.1.82; raffinose synthase [EC:2.4.1.82]	mdm00052 Galactose metabolism - Malus domestica (apple); mdm01100 Metabolic pathways - Malus domestica (apple);	IPR013785; IPR017853;	Aldolase-type TIM barrel; Glycoside hydrolase superfamily;
RchiOBHm_Chr3g0463911	Putative transcription factor WD40-like family	0.471	Down	0.0015443	---	10.2	79.083	11	4	4	2	3	3	0	2	1	3	3	4	4	4	3	3	3	4	4	4	3	100190	116270	109160	55149	42487	55694	1.255	1.457	1.367	0.691	0.532	0.698	vacuolar membrane
RchiOBHm_Chr3g0463941	Putative acetyl-CoA carboxylase	0.488	Down	0.00026206	---	44	83.56	113	28	27	24	24	22	16	12	15	26	24	26	23	20	22	25	23	25	22	19	21	2532300	2420400	2437700	1239700	1295200	1071000	1.382	1.321	1.33	0.676	0.707	0.584	chloroplast	GO:0044711 single-organism biosynthetic process; GO:0016053 organic acid biosynthetic process; GO:0044281 small molecule metabolic process; GO:0044763 single-organism cellular process; GO:0044699 single-organism process; GO:0009058 biosynthetic process; GO:0044255 cellular lipid metabolic process; GO:0006631 fatty acid metabolic process; GO:0044238 primary metabolic process; GO:0044237 cellular m…	GO:1902494 catalytic complex; GO:0009317 acetyl-CoA carboxylase complex; GO:0044464 cell part; GO:0005622 intracellular; GO:0005737 cytoplasm; GO:0032991 macromolecular complex; GO:0044424 intracellular part; GO:0005623 cell; GO:0044444 cytoplasmic part;	GO:0003989 acetyl-CoA carboxylase activity; GO:0016421 CoA carboxylase activity; GO:0003824 catalytic activity; GO:0016885 ligase activity, forming carbon-carbon bonds; GO:0016874 ligase activity;	K01962	accA; acetyl-CoA carboxylase carboxyl transferase subunit alpha [EC:6.4.1.2]	mdm00061 Fatty acid biosynthesis - Malus domestica (apple); mdm00620 Pyruvate metabolism - Malus domestica (apple); mdm00640 Propanoate metabolism - Malus domestica (apple); mdm01100 Metabolic pathways - Malus domestica (apple); mdm01110 Biosynthesis of secondary metabolites - Malus domestica (apple); mdm01200 Carbon metabolism - Malus domestica (apple); mdm01212 Fatty acid metabolism - Malus dom…	IPR029045; IPR011763;	ClpP/crotonase-like domain; Acetyl-coenzyme A carboxyltransferase, C-terminal;
RchiOBHm_Chr3g0464291	"Putative transferase, protein kinase RLK-Pelle-RLCK-XII-1 family"	0.658	Down	0.000157614	---	31	55.317	41	9	6	8	7	9	6	6	5	7	9	9	8	6	7	5	6	6	6	4	5	379790	389660	368560	249190	239030	260960	1.207	1.239	1.172	0.792	0.76	0.83	chloroplast	GO:0016310 phosphorylation; GO:0044267 cellular protein metabolic process; GO:0044238 primary metabolic process; GO:0044237 cellular metabolic process; GO:0006796 phosphate-containing compound metabolic process; GO:0071704 organic substance metabolic process; GO:0008152 metabolic process; GO:0006468 protein phosphorylation; GO:0006793 phosphorus metabolic process; GO:0044260 cellular macromolecul…		GO:0005524 ATP binding; GO:1901265 nucleoside phosphate binding; GO:0016773 phosphotransferase activity, alcohol group as acceptor; GO:0001882 nucleoside binding; GO:0043167 ion binding; GO:0005515 protein binding; GO:0004672 protein kinase activity; GO:0000166 nucleotide binding; GO:0097159 organic cyclic compound binding; GO:1901363 heterocyclic compound binding; GO:0032549 ribonucleoside bindi…				IPR000719; IPR011990; IPR001245; IPR011009;	Protein kinase domain; Tetratricopeptide-like helical domain; Serine-threonine/tyrosine-protein kinase catalytic domain; Protein kinase-like domain;
RchiOBHm_Chr3g0482331	Putative magnesium chelatase	2.687	Up	0.030938	---	6.7	153.63	11	6	6	0	0	0	3	6	2	2	3	2	6	6	5	2	3	2	6	6	5	36809	27952	0	66039	118870	76013	0.565	0.429		1.014	1.825	1.167	chloroplast	GO:0051188 cofactor biosynthetic process; GO:0046148 pigment biosynthetic process; GO:0006725 cellular aromatic compound metabolic process; GO:0015994 chlorophyll metabolic process; GO:0044699 single-organism process; GO:0009058 biosynthetic process; GO:1901566 organonitrogen compound biosynthetic process; GO:0044237 cellular metabolic process; GO:0071704 organic substance metabolic process; GO:0…		GO:0016851 magnesium chelatase activity; GO:0051002 ligase activity, forming nitrogen-metal bonds; GO:0051003 ligase activity, forming nitrogen-metal bonds, forming coordination complexes; GO:0003824 catalytic activity; GO:0016874 ligase activity;	K03403	chlH, bchH; magnesium chelatase subunit H [EC:6.6.1.1]	mdm00860 Porphyrin and chlorophyll metabolism - Malus domestica (apple); mdm01100 Metabolic pathways - Malus domestica (apple); mdm01110 Biosynthesis of secondary metabolites - Malus domestica (apple);	IPR022571;	Magnesium chelatase, subunit H, N-terminal;
RchiOBHm_Chr3g0464891	"PREDICTED: protein RETICULATA, chloroplastic [Prunus mume]"	0.598	Down	0.0027032	---	30.7	48.144	26	8	7	6	6	5	3	4	2	8	8	8	8	8	7	7	7	7	7	7	6	567820	496150	540130	355910	321720	282060	1.329	1.161	1.264	0.833	0.753	0.66	chloroplast
RchiOBHm_Chr3g0465041	Putative protein kinase Group-Pl-3 family	0.639	Down	0.0077557	---	9.8	79.009	9	4	4	1	3	1	1	2	1	4	4	4	4	4	3	4	4	4	4	4	3	71239	76789	59252	44856	40320	47229	1.258	1.356	1.047	0.792	0.712	0.834	nucleus	GO:0016310 phosphorylation; GO:0044267 cellular protein metabolic process; GO:0044238 primary metabolic process; GO:0044237 cellular metabolic process; GO:0006796 phosphate-containing compound metabolic process; GO:0071704 organic substance metabolic process; GO:0008152 metabolic process; GO:0006468 protein phosphorylation; GO:0006793 phosphorus metabolic process; GO:0044260 cellular macromolecul…		GO:0005524 ATP binding; GO:1901265 nucleoside phosphate binding; GO:0016773 phosphotransferase activity, alcohol group as acceptor; GO:0001882 nucleoside binding; GO:0043167 ion binding; GO:0004672 protein kinase activity; GO:0000166 nucleotide binding; GO:0097159 organic cyclic compound binding; GO:1901363 heterocyclic compound binding; GO:0032549 ribonucleoside binding; GO:0097367 carbohydrate …	K08269	ULK2, ATG1; serine/threonine-protein kinase ULK2 [EC:2.7.11.1]	mdm04136 Autophagy - other - Malus domestica (apple);	IPR000719; IPR011009;	Protein kinase domain; Protein kinase-like domain;
RchiOBHm_Chr3g0467101	Putative Arf GTPase activating protein	0.45	Down	0.0023163	---	38.5	49.664	38	11	11	8	7	7	7	4	5	10	9	10	10	11	11	10	9	10	10	11	11	853030	815100	767560	393510	414240	288230	1.449	1.385	1.304	0.669	0.704	0.49	nucleus			GO:0098772 molecular function regulator; GO:0030234 enzyme regulator activity; GO:0008047 enzyme activator activity; GO:0060589 nucleoside-triphosphatase regulator activity; GO:0005096 GTPase activator activity; GO:0030695 GTPase regulator activity;	K12492	ARFGAP1; ADP-ribosylation factor GTPase-activating protein 1	mdm04144 Endocytosis - Malus domestica (apple);
RchiOBHm_Chr3g0468121	Putative protein-serine/threonine phosphatase	0.469	Down	0.00192214	---	16.8	42.804	11	4	4	3	1	2	2	2	1	4	3	3	3	3	3	4	3	3	3	3	3	161480	196280	180750	97679	71875	82743	1.225	1.489	1.371	0.741	0.545	0.628	chloroplast			GO:0043169 cation binding; GO:0003824 catalytic activity; GO:0005488 binding; GO:0043167 ion binding;				IPR001932;	PPM-type phosphatase domain;
RchiOBHm_Chr3g0484051	"Putative glucan endo-1,3-beta-D-glucosidase"	24.1	Up	0.0021959	---	47.8	26.277	26	6	5	2	3	2	6	6	7	3	5	5	6	6	6	2	5	5	5	5	5	62760	178150	36209	1866200	2758100	2039100	0.054	0.154	0.031	1.613	2.384	1.763	extracellular
RchiOBHm_Chr3g0484181	"Putative glucan endo-1,3-beta-D-glucosidase"	8.932	Up	0.0023204	---	64.3	38.486	40	13	5	1	5	2	11	10	11	7	10	8	12	11	12	4	4	4	5	5	5	151280	354090	120550	1880100	2033300	1672000	0.146	0.342	0.116	1.816	1.964	1.615	nucleus	GO:0008152 metabolic process; GO:0005975 carbohydrate metabolic process; GO:0044238 primary metabolic process; GO:0071704 organic substance metabolic process;		GO:0004553 hydrolase activity, hydrolyzing O-glycosyl compounds; GO:0016787 hydrolase activity; GO:0003824 catalytic activity; GO:0016798 hydrolase activity, acting on glycosyl bonds;				IPR017853; IPR013781;	Glycoside hydrolase superfamily; Glycoside hydrolase, catalytic domain;
RchiOBHm_Chr3g0471421	Putative polyadenylate binding protein	0.261	Down	0.000180807	---	15.3	70.218	20	6	6	3	6	6	2	0	3	5	6	6	5	2	5	5	6	6	5	2	5	285530	353410	368890	97007	78400	87988	1.348	1.668	1.741	0.458	0.37	0.415	endoplasmic reticulum			GO:0097159 organic cyclic compound binding; GO:1901363 heterocyclic compound binding; GO:0003723 RNA binding; GO:1901265 nucleoside phosphate binding; GO:0005488 binding; GO:0003676 nucleic acid binding; GO:0000166 nucleotide binding; GO:0036094 small molecule binding;	K13126	PABPC; polyadenylate-binding protein	mdm03013 RNA transport - Malus domestica (apple); mdm03015 mRNA surveillance pathway - Malus domestica (apple); mdm03018 RNA degradation - Malus domestica (apple);	IPR002004; IPR000504; IPR012677; IPR003954;	Polyadenylate-binding protein/Hyperplastic disc protein; RNA recognition motif domain; Nucleotide-binding alpha-beta plait domain; RNA recognition motif domain, eukaryote;
RchiOBHm_Chr3g0474581	"Putative Heat shock protein DnaJ, cysteine-rich"	0.524	Down	0.0081815	---	34.6	33.552	33	6	6	5	6	7	5	4	6	5	6	6	6	6	6	5	6	6	6	6	6	457490	400330	432370	255440	170950	249730	1.396	1.222	1.319	0.779	0.522	0.762	plasma membrane			GO:0005515 protein binding; GO:0051082 unfolded protein binding; GO:0031072 heat shock protein binding; GO:0005488 binding;				IPR001305;	Heat shock protein DnaJ, cysteine-rich domain;
RchiOBHm_Chr3g0475021	Putative peptidase M20	0.629	Down	0.036384	---	37.1	48.146	49	12	11	11	10	13	6	6	3	12	11	11	9	10	7	11	10	10	8	9	6	238060	232530	346450	159100	159840	194970	1.073	1.048	1.562	0.717	0.721	0.879	extracellular	GO:0008152 metabolic process;		GO:0016787 hydrolase activity; GO:0003824 catalytic activity;	K14664	ILR1; IAA-amino acid hydrolase [EC:3.5.1.-]		IPR011650;	Peptidase M20, dimerisation domain;
RchiOBHm_Chr3g0485561	Putative peptidylprolyl isomerase	3.903	Up	2.3592e-05	---	31.5	26.852	25	5	3	4	3	3	6	5	4	4	4	4	5	5	5	3	3	3	3	3	3	91667	100520	88485	345490	403070	347210	0.4	0.438	0.386	1.506	1.757	1.514	chloroplast	GO:0044267 cellular protein metabolic process; GO:0044238 primary metabolic process; GO:0018208 peptidyl-proline modification; GO:0000413 protein peptidyl-prolyl isomerization; GO:0044237 cellular metabolic process; GO:0071704 organic substance metabolic process; GO:0006457 protein folding; GO:0018193 peptidyl-amino acid modification; GO:0008152 metabolic process; GO:0044260 cellular macromolecul…		GO:0003755 peptidyl-prolyl cis-trans isomerase activity; GO:0016853 isomerase activity; GO:0003824 catalytic activity; GO:0016859 cis-trans isomerase activity;	K03768	PPIB, ppiB; peptidyl-prolyl cis-trans isomerase B (cyclophilin B) [EC:5.2.1.8]		IPR002130; IPR029000;	Cyclophilin-type peptidyl-prolyl cis-trans isomerase domain; Cyclophilin-like domain;
RchiOBHm_Chr3g0490221	Putative glutamate decarboxylase	2.028	Up	0.0052814	---	57	56.339	113	21	20	21	17	12	22	20	21	20	20	20	20	20	21	19	19	19	19	19	20	4870400	4827500	3288300	9010300	8421800	8908900	0.743	0.737	0.502	1.375	1.285	1.359	chloroplast	GO:0009064 glutamine family amino acid metabolic process; GO:0043648 dicarboxylic acid metabolic process; GO:0044281 small molecule metabolic process; GO:0044763 single-organism cellular process; GO:0006807 nitrogen compound metabolic process; GO:0044699 single-organism process; GO:0044238 primary metabolic process; GO:1901605 alpha-amino acid metabolic process; GO:0044237 cellular metabolic proc…		GO:0097159 organic cyclic compound binding; GO:1901363 heterocyclic compound binding; GO:0004351 glutamate decarboxylase activity; GO:0003824 catalytic activity; GO:0005488 binding; GO:0016830 carbon-carbon lyase activity; GO:0043167 ion binding; GO:0016831 carboxy-lyase activity; GO:0016829 lyase activity; GO:0043168 anion binding; GO:0048037 cofactor binding; GO:0030170 pyridoxal phosphate bind…	K01580	E4.1.1.15, gadB, gadA, GAD; glutamate decarboxylase [EC:4.1.1.15]	mdm00250 Alanine, aspartate and glutamate metabolism - Malus domestica (apple); mdm00410 beta-Alanine metabolism - Malus domestica (apple); mdm00430 Taurine and hypotaurine metabolism - Malus domestica (apple); mdm00650 Butanoate metabolism - Malus domestica (apple); mdm01100 Metabolic pathways - Malus domestica (apple); mdm01110 Biosynthesis of secondary metabolites - Malus domestica (apple);	IPR015424; IPR015422; IPR015421;	Pyridoxal phosphate-dependent transferase; Pyridoxal phosphate-dependent transferase, major region, subdomain 2; Pyridoxal phosphate-dependent transferase, major region, subdomain 1;
RchiOBHm_Chr4g0391871	Putative Actin family	1.53	Up	0.043075	---	18	67.18	20	6	6	4	0	3	4	5	4	4	4	4	5	6	5	4	4	4	5	6	5	65005	49386	67404	75276	94325	108460	0.848	0.644	0.879	0.982	1.231	1.415	cytoplasm				K11673	ACTR8, ARP8, INO80N; actin-related protein 8
RchiOBHm_Chr4g0392351	Putative deacetoxyvindoline 4-hydroxylase	1.596	Up	0.010681	---	43.8	40.922	44	10	10	7	8	5	6	9	9	9	8	7	7	10	9	9	8	7	7	10	9	499430	502900	403310	825200	774580	644730	0.821	0.827	0.663	1.356	1.273	1.06	cytoplasm	GO:0044699 single-organism process; GO:0008152 metabolic process; GO:0055114 oxidation-reduction process; GO:0044710 single-organism metabolic process;		GO:0003824 catalytic activity; GO:0016491 oxidoreductase activity;				IPR027443; IPR005123; IPR026992;	Isopenicillin N synthase-like; Oxoglutarate/iron-dependent dioxygenase; Non-haem dioxygenase N-terminal domain;
RchiOBHm_Chr4g0396351	Putative glutathione transferase	1.902	Up	0.005023	---	42.3	26.346	21	8	6	3	3	1	5	4	5	5	8	3	7	7	8	4	6	2	5	6	6	113210	123130	88823	181400	218910	218510	0.72	0.783	0.565	1.153	1.391	1.389	cytoplasm			GO:0005515 protein binding; GO:0005488 binding;	K00799	GST, gst; glutathione S-transferase [EC:2.5.1.18]	mdm00480 Glutathione metabolism - Malus domestica (apple); mdm01100 Metabolic pathways - Malus domestica (apple);	IPR004046; IPR010987; IPR012336; IPR004045;	Glutathione S-transferase, C-terminal; Glutathione S-transferase, C-terminal-like; Thioredoxin-like fold; Glutathione S-transferase, N-terminal;
RchiOBHm_Chr4g0397091	Putative ubiquinol oxidase (non-electrogenic)	1.79	Up	0.00116457	---	23.1	38.607	35	7	5	4	3	5	9	8	6	7	6	4	6	7	7	5	4	3	5	5	5	439970	424580	403260	742540	849170	678220	0.746	0.72	0.684	1.259	1.44	1.15	mitochondria	GO:0044699 single-organism process; GO:0008152 metabolic process; GO:0055114 oxidation-reduction process; GO:0044710 single-organism metabolic process;		GO:0016682 oxidoreductase activity, acting on diphenols and related substances as donors, oxygen as acceptor; GO:0016679 oxidoreductase activity, acting on diphenols and related substances as donors; GO:0003824 catalytic activity; GO:0009916 alternative oxidase activity; GO:0016491 oxidoreductase activity;	K17893	AOX1, AOX2; ubiquinol oxidase [EC:1.10.3.11]
RchiOBHm_Chr3g0478811	Putative RNA helicase	0.622	Down	0.0038045	---	33.8	70.095	30	17	9	7	6	6	4	3	4	16	16	16	12	15	12	8	8	8	5	7	5	324920	288760	265300	201940	172640	172750	1.367	1.215	1.116	0.849	0.726	0.727	nucleus			GO:0005524 ATP binding; GO:1901265 nucleoside phosphate binding; GO:0001882 nucleoside binding; GO:0043167 ion binding; GO:0000166 nucleotide binding; GO:0097159 organic cyclic compound binding; GO:1901363 heterocyclic compound binding; GO:0032549 ribonucleoside binding; GO:0097367 carbohydrate derivative binding; GO:0032553 ribonucleotide binding; GO:0005488 binding; GO:0003676 nucleic acid bind…	K11594	DDX3X, bel; ATP-dependent RNA helicase DDX3X [EC:3.6.4.13]		IPR014014; IPR011545; IPR014001; IPR027417; IPR001650;	RNA helicase, DEAD-box type, Q motif; DEAD/DEAH box helicase domain; Helicase superfamily 1/2, ATP-binding domain; P-loop containing nucleoside triphosphate hydrolase; Helicase, C-terminal;
RchiOBHm_Chr4g0397311	Putative transcription factor WD40-like family	1.991	Up	9.6875e-05	---	15.6	100.54	27	9	9	3	3	3	7	5	6	9	6	7	8	9	8	9	6	7	8	9	8	95548	108140	98120	193310	198970	208380	0.635	0.719	0.652	1.285	1.323	1.385	chloroplast	GO:0016072 rRNA metabolic process; GO:0006396 RNA processing; GO:0034470 ncRNA processing; GO:0044085 cellular component biogenesis; GO:0022613 ribonucleoprotein complex biogenesis; GO:0006725 cellular aromatic compound metabolic process; GO:0006807 nitrogen compound metabolic process; GO:0042254 ribosome biogenesis; GO:1901360 organic cyclic compound metabolic process; GO:0044238 primary metabol…	GO:0044464 cell part; GO:0005622 intracellular; GO:0032991 macromolecular complex; GO:0044424 intracellular part; GO:1990904 ribonucleoprotein complex; GO:0032040 small-subunit processome; GO:0030529 intracellular ribonucleoprotein complex; GO:0005623 cell; GO:0030684 preribosome;	GO:0005515 protein binding; GO:0005488 binding;	K14554	UTP21, WDR36; U3 small nucleolar RNA-associated protein 21	mdm03008 Ribosome biogenesis in eukaryotes - Malus domestica (apple);	IPR007319; IPR017986; IPR015943; IPR024977;	Small-subunit processome, Utp21; WD40-repeat-containing domain; WD40/YVTN repeat-like-containing domain; Anaphase-promoting complex subunit 4, WD40 domain;
RchiOBHm_Chr3g0480691	Putative transcription factor WD40-like family	0.46	Down	0.027556	---	20	38.404	9	4	4	2	2	3	1	1	0	2	3	4	3	2	3	2	3	4	3	2	3	23829	25355	40256	12975	17813	10361	1.095	1.165	1.85	0.596	0.818	0.476	nucleus			GO:0005515 protein binding; GO:0005488 binding;				IPR017986; IPR015943;	WD40-repeat-containing domain; WD40/YVTN repeat-like-containing domain;
RchiOBHm_Chr3g0480801	nucleolar gar2-like protein [Medicago truncatula]	0.187	Down	0.0082423	---	11.6	87.053	15	5	4	3	3	6	0	2	1	5	4	5	2	2	2	4	3	4	2	1	1	102620	167040	219110	17059	32229	42153	1.061	1.727	2.266	0.176	0.333	0.436	nucleus
RchiOBHm_Chr3g0485571	Putative pyridoxal phosphatase	0.418	Down	0.0054555	---	17	31.214	13	3	3	3	3	3	1	1	2	3	3	3	2	3	2	3	3	3	2	3	2	44061	58029	53606	22714	16321	26083	1.197	1.577	1.457	0.617	0.443	0.709	cytoplasm	GO:0008152 metabolic process;		GO:0016787 hydrolase activity; GO:0003824 catalytic activity;	K18551	SDT1; pyrimidine and pyridine-specific 5'-nucleotidase [EC:3.1.3.-]	mdm00760 Nicotinate and nicotinamide metabolism - Malus domestica (apple);	IPR023214;	HAD-like domain;
RchiOBHm_Chr4g0400821	Putative peroxidase	2.401	Up	0.0058562	---	39.6	35.608	30	8	7	5	4	4	5	6	6	7	7	6	7	7	8	6	6	5	6	6	7	268340	216080	170800	424530	566650	582160	0.722	0.582	0.46	1.143	1.526	1.567	vacuolar membrane	GO:0008152 metabolic process; GO:0042743 hydrogen peroxide metabolic process; GO:0006950 response to stress; GO:0072593 reactive oxygen species metabolic process; GO:0055114 oxidation-reduction process; GO:0044710 single-organism metabolic process; GO:0006979 response to oxidative stress; GO:0044699 single-organism process; GO:0044248 cellular catabolic process; GO:0050896 response to stimulus; G…		GO:0097159 organic cyclic compound binding; GO:1901363 heterocyclic compound binding; GO:0020037 heme binding; GO:0003824 catalytic activity; GO:0005488 binding; GO:0016209 antioxidant activity; GO:0004601 peroxidase activity; GO:0046906 tetrapyrrole binding; GO:0016491 oxidoreductase activity; GO:0016684 oxidoreductase activity, acting on peroxide as acceptor;	K00430	E1.11.1.7; peroxidase [EC:1.11.1.7]	mdm00940 Phenylpropanoid biosynthesis - Malus domestica (apple); mdm01100 Metabolic pathways - Malus domestica (apple); mdm01110 Biosynthesis of secondary metabolites - Malus domestica (apple);	IPR033905; IPR002016;	Secretory peroxidase; Haem peroxidase, plant/fungal/bacterial;
RchiOBHm_Chr3g0487091	Putative long-chain-fatty-acid--CoA ligase	0.663	Down	0.0123601	---	36.6	73.961	50	16	12	8	10	11	8	6	7	15	15	15	14	15	14	11	11	12	10	12	10	566320	495180	630390	364090	337520	420070	1.208	1.056	1.344	0.776	0.72	0.896	cytoplasm	GO:0008152 metabolic process;		GO:0003824 catalytic activity;	K01897	ACSL, fadD; long-chain acyl-CoA synthetase [EC:6.2.1.3]	mdm00061 Fatty acid biosynthesis - Malus domestica (apple); mdm00071 Fatty acid degradation - Malus domestica (apple); mdm01100 Metabolic pathways - Malus domestica (apple); mdm01212 Fatty acid metabolism - Malus domestica (apple); mdm04146 Peroxisome - Malus domestica (apple);	IPR000873;	AMP-dependent synthetase/ligase;
RchiOBHm_Chr3g0487771	Putative transcription factor ARF family	0.433	Down	0.00059546	---	31.7	94.404	67	17	11	15	11	14	10	10	7	16	16	15	15	15	13	10	10	10	9	10	8	980600	998350	1105000	493810	381880	459850	1.331	1.355	1.5	0.67	0.518	0.624	nucleus	GO:0050794 regulation of cellular process; GO:0010468 regulation of gene expression; GO:0006355 regulation of transcription, DNA-templated; GO:0031326 regulation of cellular biosynthetic process; GO:0080090 regulation of primary metabolic process; GO:0060255 regulation of macromolecule metabolic process; GO:0019219 regulation of nucleobase-containing compound metabolic process; GO:0010556 regulat…	GO:0043226 organelle; GO:0043231 intracellular membrane-bounded organelle; GO:0043229 intracellular organelle; GO:0005634 nucleus; GO:0044464 cell part; GO:0005622 intracellular; GO:0044424 intracellular part; GO:0043227 membrane-bounded organelle; GO:0005623 cell;	GO:0097159 organic cyclic compound binding; GO:1901363 heterocyclic compound binding; GO:0003677 DNA binding; GO:0005515 protein binding; GO:0005488 binding; GO:0003676 nucleic acid binding;				IPR000270; IPR033389; IPR003340; IPR010525; IPR015300;	PB1 domain; AUX/IAA domain; B3 DNA binding domain; Auxin response factor; DNA-binding pseudobarrel domain;
RchiOBHm_Chr4g0384941	Putative SH3 domain-containing protein	0.561	Down	0.003076	---	17.6	130.76	55	14	14	12	11	12	5	7	8	12	13	12	9	12	11	12	13	12	9	12	11	524710	444780	402220	267700	267970	233660	1.47	1.246	1.127	0.75	0.751	0.655	nucleus			GO:0005515 protein binding; GO:0005488 binding;				IPR001452; IPR011989; IPR016024;	SH3 domain; Armadillo-like helical; Armadillo-type fold;
RchiOBHm_Chr4g0386051	Putative methyltransferase	0.493	Down	0.03354	---	37.7	39.45	10	10	3	2	2	2	2	0	2	9	10	10	10	9	9	3	3	3	3	2	2	78990	81191	80104	31427	50081	37026	1.321	1.358	1.339	0.526	0.837	0.619	chloroplast	GO:0006694 steroid biosynthetic process; GO:0008152 metabolic process; GO:0044711 single-organism biosynthetic process; GO:0044710 single-organism metabolic process; GO:0008202 steroid metabolic process; GO:1901360 organic cyclic compound metabolic process; GO:0044699 single-organism process; GO:0009058 biosynthetic process; GO:0044238 primary metabolic process; GO:1901576 organic substance biosy…		GO:0016741 transferase activity, transferring one-carbon groups; GO:0008168 methyltransferase activity; GO:0003824 catalytic activity; GO:0016740 transferase activity;	K08242	E2.1.1.143; 24-methylenesterol C-methyltransferase [EC:2.1.1.143]	mdm00100 Steroid biosynthesis - Malus domestica (apple); mdm01110 Biosynthesis of secondary metabolites - Malus domestica (apple);	IPR030384; IPR013705; IPR029063; IPR013216;	SAM-dependent methyltransferase SMT-type; Sterol methyltransferase C-terminal; S-adenosyl-L-methionine-dependent methyltransferase; Methyltransferase type 11;
RchiOBHm_Chr4g0387781	Putative dymeclin	0.632	Down	0.03168	---	10.5	81.644	17	6	6	5	1	3	2	3	3	6	6	5	5	5	6	6	6	5	5	5	6	274300	236760	356710	207330	163550	177090	1.163	1.003	1.512	0.879	0.693	0.751	chloroplast
RchiOBHm_Chr4g0388821	RNA polymerase II transcription elongation factor DSIF/SUPT5H/SPT5 (ISS) [Ostreococcus tauri]	0.463	Down	0.0169983	---	35.2	73.787	90	18	18	17	18	17	16	12	10	18	17	17	17	17	17	18	17	17	17	17	17	2500400	2590200	2502700	1357900	1202800	957410	1.35	1.399	1.351	0.733	0.649	0.517	chloroplast
RchiOBHm_Chr4g0401741	Putative ribulose-bisphosphate carboxylase	1.804	Up	0.0124822	---	21.8	19.621	21	3	3	3	2	3	6	3	4	2	2	2	3	3	3	2	2	2	3	3	3	1712700	1220000	1661200	2735600	2371400	3180500	0.798	0.568	0.774	1.274	1.105	1.481	chloroplast				K01602	rbcS; ribulose-bisphosphate carboxylase small chain [EC:4.1.1.39]	mdm00630 Glyoxylate and dicarboxylate metabolism - Malus domestica (apple); mdm00710 Carbon fixation in photosynthetic organisms - Malus domestica (apple); mdm01100 Metabolic pathways - Malus domestica (apple); mdm01110 Biosynthesis of secondary metabolites - Malus domestica (apple); mdm01200 Carbon metabolism - Malus domestica (apple);	IPR000894;	Ribulose bisphosphate carboxylase small chain, domain;
RchiOBHm_Chr4g0393651	transmembrane protein [Arabidopsis thaliana]	0.575	Down	0.0193445	---	16	107.89	30	9	9	8	6	5	3	5	3	9	8	8	6	8	5	9	8	8	6	8	5	213110	195600	162320	101580	137060	89926	1.421	1.305	1.083	0.678	0.914	0.6	plasma membrane
RchiOBHm_Chr4g0402511	Putative nepenthesin	1.647	Up	0.0084404	---	16.7	53.284	22	5	3	3	3	1	5	5	5	4	4	4	4	4	4	2	3	2	3	2	3	312850	225710	249200	398310	452960	446460	0.9	0.649	0.717	1.146	1.303	1.284	chloroplast							IPR032799; IPR033121; IPR021109; IPR033873; IPR032861;	Xylanase inhibitor, C-terminal; Peptidase family A1 domain; Aspartic peptidase domain; CND41-like; Xylanase inhibitor, N-terminal;
RchiOBHm_Chr4g0393671	Putative protein kinase CK1-CK1 family	0.219	Down	0.0051797	---	10.8	52.258	7	4	3	2	3	2	0	0	0	3	4	4	4	2	3	2	3	3	3	1	2	56564	48878	35273	11626	0	8931.4	1.754	1.515	1.094	0.36		0.277	nucleus	GO:0016310 phosphorylation; GO:0044267 cellular protein metabolic process; GO:0044238 primary metabolic process; GO:0044237 cellular metabolic process; GO:0006796 phosphate-containing compound metabolic process; GO:0071704 organic substance metabolic process; GO:0008152 metabolic process; GO:0006468 protein phosphorylation; GO:0006793 phosphorus metabolic process; GO:0044260 cellular macromolecul…		GO:0005524 ATP binding; GO:1901265 nucleoside phosphate binding; GO:0016773 phosphotransferase activity, alcohol group as acceptor; GO:0001882 nucleoside binding; GO:0043167 ion binding; GO:0004672 protein kinase activity; GO:0000166 nucleotide binding; GO:0097159 organic cyclic compound binding; GO:1901363 heterocyclic compound binding; GO:0032549 ribonucleoside binding; GO:0097367 carbohydrate …	K08960	CSNK1E; casein kinase 1, epsilon [EC:2.7.11.1]		IPR000719; IPR011009;	Protein kinase domain; Protein kinase-like domain;
RchiOBHm_Chr4g0404991	Putative aldehyde oxygenase (deformylating)	2.286	Up	0.0023808	---	18.7	71.844	16	6	6	2	1	2	4	2	5	4	4	4	5	5	6	4	4	4	5	5	6	89008	99685	77626	196130	172600	239820	0.61	0.684	0.532	1.345	1.184	1.645	cytoplasm	GO:0044711 single-organism biosynthetic process; GO:0016053 organic acid biosynthetic process; GO:0055114 oxidation-reduction process; GO:0044281 small molecule metabolic process; GO:0044763 single-organism cellular process; GO:0044699 single-organism process; GO:0009058 biosynthetic process; GO:0044255 cellular lipid metabolic process; GO:0006631 fatty acid metabolic process; GO:0044238 primary …		GO:0005506 iron ion binding; GO:0046914 transition metal ion binding; GO:0003824 catalytic activity; GO:0005488 binding; GO:0043167 ion binding; GO:0046872 metal ion binding; GO:0043169 cation binding; GO:0016491 oxidoreductase activity;	K15404	K15404, CER1; aldehyde decarbonylase [EC:4.1.99.5]	mdm00073 Cutin, suberine and wax biosynthesis - Malus domestica (apple); mdm01110 Biosynthesis of secondary metabolites - Malus domestica (apple);	IPR016040; IPR006694; IPR021940;	NAD(P)-binding domain; Fatty acid hydroxylase; Uncharacterised domain Wax2, C-terminal;
RchiOBHm_Chr4g0396341	PREDICTED: FK506-binding protein 5-like isoform X1 [Gossypium hirsutum]	0.64	Down	0.0117966	---	14.2	85.968	31	6	6	5	6	6	5	5	4	6	6	6	6	6	4	6	6	6	6	6	4	166320	160600	146020	86104	119550	96890	1.287	1.243	1.13	0.666	0.925	0.75	nucleus
RchiOBHm_Chr4g0403321	Putative protein kinase TKL-Pl-6 family	0.252	Down	0.0006794	---	8.6	121.52	12	6	5	3	3	3	1	1	1	5	4	4	5	5	6	4	3	3	4	4	5	85236	98501	87704	27879	17252	23335	1.505	1.739	1.548	0.492	0.305	0.412	nucleus	GO:0016310 phosphorylation; GO:0044267 cellular protein metabolic process; GO:0044238 primary metabolic process; GO:0044237 cellular metabolic process; GO:0006796 phosphate-containing compound metabolic process; GO:0071704 organic substance metabolic process; GO:0008152 metabolic process; GO:0006468 protein phosphorylation; GO:0006793 phosphorus metabolic process; GO:0044260 cellular macromolecul…		GO:0005524 ATP binding; GO:1901265 nucleoside phosphate binding; GO:0016773 phosphotransferase activity, alcohol group as acceptor; GO:0001882 nucleoside binding; GO:0043167 ion binding; GO:0005515 protein binding; GO:0004672 protein kinase activity; GO:0000166 nucleotide binding; GO:0097159 organic cyclic compound binding; GO:1901363 heterocyclic compound binding; GO:0032549 ribonucleoside bindi…				IPR000270; IPR000719; IPR001245; IPR011009;	PB1 domain; Protein kinase domain; Serine-threonine/tyrosine-protein kinase catalytic domain; Protein kinase-like domain;
RchiOBHm_Chr4g0405181	Putative 43kDa postsynaptic protein	0.576	Down	0.01464	---	19.8	27.193	13	4	4	2	1	3	2	3	2	3	2	3	2	3	3	3	2	3	2	3	3	64731	68845	84253	34420	50186	40960	1.131	1.203	1.472	0.601	0.877	0.716	nucleus			GO:0005515 protein binding; GO:0005488 binding;				IPR011990; IPR013026;	Tetratricopeptide-like helical domain; Tetratricopeptide repeat-containing domain;
RchiOBHm_Chr4g0408481	Putative oxidoreductase	2.057	Up	0.0045571	---	19.5	28.481	17	3	2	2	3	3	2	3	4	1	2	2	1	2	3	1	1	1	1	1	2	93119	101600	87383	169700	240450	170410	0.648	0.707	0.608	1.18	1.672	1.185	nucleus			GO:0003824 catalytic activity; GO:0016491 oxidoreductase activity;	K08081	TR1; tropinone reductase I [EC:1.1.1.206]	mdm00960 Tropane, piperidine and pyridine alkaloid biosynthesis - Malus domestica (apple); mdm01100 Metabolic pathways - Malus domestica (apple); mdm01110 Biosynthesis of secondary metabolites - Malus domestica (apple);	IPR016040;	NAD(P)-binding domain;
RchiOBHm_Chr4g0416751	Putative long-chain-fatty-acid--CoA ligase	1.729	Up	0.00028335	---	33.1	76.115	62	14	14	11	10	9	11	10	11	11	11	12	14	13	14	11	11	12	14	13	14	664340	694750	734100	1121500	1247100	1251000	0.698	0.73	0.771	1.178	1.31	1.314	chloroplast	GO:0008152 metabolic process;		GO:0003824 catalytic activity;	K01897	ACSL, fadD; long-chain acyl-CoA synthetase [EC:6.2.1.3]	mdm00061 Fatty acid biosynthesis - Malus domestica (apple); mdm00071 Fatty acid degradation - Malus domestica (apple); mdm01100 Metabolic pathways - Malus domestica (apple); mdm01212 Fatty acid metabolism - Malus domestica (apple); mdm04146 Peroxisome - Malus domestica (apple);	IPR025110; IPR000873;	AMP-binding enzyme C-terminal domain; AMP-dependent synthetase/ligase;
RchiOBHm_Chr4g0418601	Putative alpha/Beta hydrolase	2.164	Up	0.00086388	---	27.7	15.244	10	3	3	2	0	3	2	1	2	2	2	2	2	1	2	2	2	2	2	1	2	109850	96463	96863	214560	0	222660	0.742	0.651	0.654	1.449		1.504	cytoplasm			GO:0016787 hydrolase activity; GO:0003824 catalytic activity;				IPR029058; IPR002925;	Alpha/Beta hydrolase fold; Dienelactone hydrolase;
RchiOBHm_Chr4g0420971	Putative beta-amylase	5.994	Up	0.000121603	---	42.1	58.238	45	13	13	3	1	3	11	14	13	6	4	7	11	12	13	6	4	7	11	12	13	205790	182040	254450	1403800	1339900	1108600	0.275	0.243	0.34	1.874	1.789	1.48	nucleus	GO:1901575 organic substance catabolic process; GO:0008152 metabolic process; GO:0005976 polysaccharide metabolic process; GO:0009057 macromolecule catabolic process; GO:0043170 macromolecule metabolic process; GO:0000272 polysaccharide catabolic process; GO:0044238 primary metabolic process; GO:0005975 carbohydrate metabolic process; GO:0009056 catabolic process; GO:0016052 carbohydrate cataboli…		GO:0004553 hydrolase activity, hydrolyzing O-glycosyl compounds; GO:0016787 hydrolase activity; GO:0016160 amylase activity; GO:0016161 beta-amylase activity; GO:0003824 catalytic activity; GO:0016798 hydrolase activity, acting on glycosyl bonds;				IPR017853; IPR013781;	Glycoside hydrolase superfamily; Glycoside hydrolase, catalytic domain;
RchiOBHm_Chr4g0423641	"Putative START-like domain, Bet v I type allergen"	8.477	Up	0.00195859	---	82.5	17.567	40	12	0	4	3	6	9	9	9	10	11	11	12	12	12	0	0	0	0	0	0	241410	494820	185290	2264400	3069700	2468200	0.166	0.34	0.127	1.557	2.111	1.698	cytoplasm	GO:0006952 defense response; GO:0050896 response to stimulus; GO:0006950 response to stress; GO:0009607 response to biotic stimulus;						IPR000916; IPR023393;	Bet v I/Major latex protein; START-like domain;
RchiOBHm_Chr4g0423881	"Putative START-like domain, Bet v I type allergen"	3.691	Up	8.2885e-05	---	46.3	25.532	48	10	9	8	7	7	9	8	9	9	9	8	9	10	9	8	8	7	8	9	8	693150	790740	643480	2689300	2814400	2349600	0.417	0.475	0.387	1.617	1.692	1.412	cytoplasm	GO:0006952 defense response; GO:0050896 response to stimulus; GO:0006950 response to stress; GO:0009607 response to biotic stimulus;						IPR000916; IPR023393;	Bet v I/Major latex protein; START-like domain;
RchiOBHm_Chr4g0405441	Putative clustered mitochondria protein	0.168	Down	0.011785	---	9.1	200.96	19	13	13	3	10	5	0	1	0	10	12	8	3	4	5	10	12	8	3	4	5	134530	411410	358300	66573	37772	47298	0.764	2.338	2.036	0.378	0.215	0.269	nucleus			GO:0005515 protein binding; GO:0005488 binding;	K03255	TIF31, CLU1; protein TIF31		IPR033646; IPR011990; IPR028275; IPR013026;	CLU central domain; Tetratricopeptide-like helical domain; Clustered mitochondria protein, N-terminal; Tetratricopeptide repeat-containing domain;
RchiOBHm_Chr4g0423901	"Putative START-like domain, Bet v I type allergen"	2.699	Up	0.00049501	---	77.4	17.464	71	14	2	9	7	8	14	16	17	12	13	14	14	13	14	1	2	2	2	2	2	1686500	1782000	1324700	4248900	4111600	4569800	0.571	0.603	0.448	1.438	1.392	1.547	cytoplasm	GO:0006952 defense response; GO:0050896 response to stimulus; GO:0006950 response to stress; GO:0009607 response to biotic stimulus;						IPR000916; IPR023393;	Bet v I/Major latex protein; START-like domain;
RchiOBHm_Chr4g0408181	"PREDICTED: LOW QUALITY PROTEIN: probable isoleucine--tRNA ligase, cytoplasmic [Fragaria vesca subsp.vesca]"	0.653	Down	6.249e-05	---	26.9	135.59	87	24	24	21	14	15	13	12	12	22	20	20	18	20	18	22	20	20	18	20	18	1054000	989740	1042500	686820	652930	676030	1.24	1.164	1.226	0.808	0.768	0.795	cytoplasm	GO:0006518 peptide metabolic process; GO:0006725 cellular aromatic compound metabolic process; GO:0044267 cellular protein metabolic process; GO:0044699 single-organism process; GO:0009058 biosynthetic process; GO:0006428 isoleucyl-tRNA aminoacylation; GO:1901566 organonitrogen compound biosynthetic process; GO:0043039 tRNA aminoacylation; GO:0044237 cellular metabolic process; GO:0071704 organic…	GO:0044424 intracellular part; GO:0005623 cell; GO:0044464 cell part; GO:0005622 intracellular; GO:0005737 cytoplasm;	GO:0016876 ligase activity, forming aminoacyl-tRNA and related compounds; GO:1901265 nucleoside phosphate binding; GO:0052689 carboxylic ester hydrolase activity; GO:0016875 ligase activity, forming carbon-oxygen bonds; GO:0016874 ligase activity; GO:0016787 hydrolase activity; GO:0097159 organic cyclic compound binding; GO:1901363 heterocyclic compound binding; GO:0000049 tRNA binding; GO:000382…	K01870	IARS, ileS; isoleucyl-tRNA synthetase [EC:6.1.1.5]	mdm00970 Aminoacyl-tRNA biosynthesis - Malus domestica (apple);	IPR014729; IPR033709; IPR013155; IPR009008; IPR002300; IPR009080;	Rossmann-like alpha/beta/alpha sandwich fold; Isoleucyl tRNA synthetase type 2, anticodon-binding domain; Methionyl/Valyl/Leucyl/Isoleucyl-tRNA synthetase, anticodon-binding; Valyl/Leucyl/Isoleucyl-tRNA synthetase, editing domain; Aminoacyl-tRNA synthetase, class Ia; Aminoacyl-tRNA synthetase, class Ia, anticodon-binding;
RchiOBHm_Chr4g0409551	"Putative glycoside hydrolase, family 19, catalytic, Lysozyme-like domain-containing protein"	0.469	Down	1.53394e-05	---	24.8	47.471	26	6	6	5	5	5	3	4	4	6	6	6	5	5	5	6	6	6	5	5	5	869990	854280	899520	402400	428960	397850	1.355	1.33	1.401	0.627	0.668	0.62	chloroplast	GO:1901071 glucosamine-containing compound metabolic process; GO:0006030 chitin metabolic process; GO:0044036 cell wall macromolecule metabolic process; GO:0006026 aminoglycan catabolic process; GO:1901136 carbohydrate derivative catabolic process; GO:0006807 nitrogen compound metabolic process; GO:0006032 chitin catabolic process; GO:1901072 glucosamine-containing compound catabolic process; GO:…		GO:0004553 hydrolase activity, hydrolyzing O-glycosyl compounds; GO:0016787 hydrolase activity; GO:0004568 chitinase activity; GO:0003824 catalytic activity; GO:0016798 hydrolase activity, acting on glycosyl bonds;				IPR000726; IPR023346;	Glycoside hydrolase, family 19, catalytic; Lysozyme-like domain;
RchiOBHm_Chr4g0423961	"Putative START-like domain, Bet v I type allergen"	16.877	Up	0.045622	---	60.6	17.424	14	7	4	0	0	0	4	5	5	5	6	3	7	7	7	2	3	0	4	4	4	52568	35136	0	717510	774680	718820	0.114	0.076		1.561	1.685	1.564	cytoplasm	GO:0006952 defense response; GO:0050896 response to stimulus; GO:0006950 response to stress; GO:0009607 response to biotic stimulus;						IPR000916; IPR023393;	Bet v I/Major latex protein; START-like domain;
RchiOBHm_Chr4g0411331	"Putative phosphoglucan, water dikinase"	0.512	Down	0.020338	---	41.9	130.45	164	32	29	33	30	36	21	20	24	31	29	30	28	26	27	29	26	27	25	24	24	4224200	4210400	4136300	2497300	1782400	2163100	1.333	1.329	1.305	0.788	0.562	0.683	chloroplast	GO:0016310 phosphorylation; GO:0008152 metabolic process; GO:0044237 cellular metabolic process; GO:0006793 phosphorus metabolic process; GO:0009987 cellular process; GO:0006796 phosphate-containing compound metabolic process;		GO:0005524 ATP binding; GO:1901265 nucleoside phosphate binding; GO:0001882 nucleoside binding; GO:0043167 ion binding; GO:0000166 nucleotide binding; GO:2001070 starch binding; GO:0097159 organic cyclic compound binding; GO:1901363 heterocyclic compound binding; GO:0032549 ribonucleoside binding; GO:0097367 carbohydrate derivative binding; GO:0016301 kinase activity; GO:0030247 polysaccharide bi…	K15535	PWD; phosphoglucan, water dikinase [EC:2.7.9.5]		IPR002192; IPR013783; IPR013816; IPR013784; IPR002044; IPR013815;	Pyruvate phosphate dikinase, PEP/pyruvate-binding; Immunoglobulin-like fold; ATP-grasp fold, subdomain 2; Carbohydrate-binding-like fold; Carbohydrate binding module family 20; ATP-grasp fold, subdomain 1;
RchiOBHm_Chr4g0412141	Putative RNA-directed RNA polymerase	0.382	Down	0.0020169	---	20.4	136.93	37	15	14	9	7	11	5	3	2	13	13	14	12	8	11	12	12	13	11	7	10	344670	308350	344810	139770	145010	95958	1.5	1.342	1.501	0.608	0.631	0.418	nucleus			GO:0097159 organic cyclic compound binding; GO:1901363 heterocyclic compound binding; GO:1901265 nucleoside phosphate binding; GO:0016779 nucleotidyltransferase activity; GO:0034062 5'-3' RNA polymerase activity; GO:0003824 catalytic activity; GO:0097747 RNA polymerase activity; GO:0003968 RNA-directed 5'-3' RNA polymerase activity; GO:0005488 binding; GO:0000166 nucleotide binding; GO:0016740 tr…	K11699	RDR, RDRP; RNA-dependent RNA polymerase [EC:2.7.7.48]		IPR012677;	Nucleotide-binding alpha-beta plait domain;
RchiOBHm_Chr4g0424011	"Putative START-like domain, Bet v I type allergen"	2.462	Up	0.00027592	---	68.8	17.452	64	10	7	8	12	7	13	12	12	10	10	10	10	10	10	7	7	7	7	7	7	1572800	1713500	1378900	3582500	4110900	3791600	0.584	0.637	0.512	1.331	1.527	1.409	cytoplasm	GO:0006952 defense response; GO:0050896 response to stimulus; GO:0006950 response to stress; GO:0009607 response to biotic stimulus;						IPR023393; IPR000916;	START-like domain; Bet v I/Major latex protein;
RchiOBHm_Chr4g0412531	Putative transcription factor C2H2 family	0.644	Down	0.0054166	---	17.1	139.3	40	13	13	7	7	9	6	6	5	11	12	11	10	9	8	11	12	11	10	9	8	389590	443600	349870	251210	273020	237370	1.202	1.369	1.079	0.775	0.842	0.732	nucleus			GO:0046872 metal ion binding; GO:0043169 cation binding; GO:0005488 binding; GO:0043167 ion binding;				IPR007087;	Zinc finger, C2H2;
RchiOBHm_Chr4g0424381	Putative glycosidase	64.934	Up	2.0527e-05	---	51.3	84.031	72	24	24	2	2	0	23	26	19	12	12	8	23	24	20	12	12	8	23	24	20	141610	140000	112180	7082600	11563000	7059500	0.033	0.032	0.026	1.628	2.658	1.623	chloroplast	GO:0008152 metabolic process; GO:0005975 carbohydrate metabolic process; GO:0044238 primary metabolic process; GO:0071704 organic substance metabolic process;		GO:0004553 hydrolase activity, hydrolyzing O-glycosyl compounds; GO:0016787 hydrolase activity; GO:0003824 catalytic activity; GO:0016798 hydrolase activity, acting on glycosyl bonds;				IPR002772; IPR001764; IPR026891; IPR017853;	Glycoside hydrolase family 3 C-terminal domain; Glycoside hydrolase, family 3, N-terminal; Fibronectin type III-like domain; Glycoside hydrolase superfamily;
RchiOBHm_Chr4g0413361	Putative exostosin	0.275	Down	0.0168812	---	18.4	56.518	18	6	6	5	4	5	1	1	2	5	5	5	4	4	4	5	5	5	4	4	4	206780	214010	365140	44090	57606	114760	1.238	1.281	2.186	0.264	0.345	0.687	endoplasmic reticulum				K20888	MUR3; xyloglucan galactosyltransferase MUR3 [EC:2.4.1.-]
RchiOBHm_Chr4g0416831	"Putative carboxylesterase, 2-hydroxyisoflavanone dehydratase"	0.289	Down	0.0021371	---	7.7	71.633	14	3	3	3	3	3	2	1	2	3	3	3	3	3	3	3	3	3	3	3	3	120960	122780	95714	43744	26413	27907	1.659	1.684	1.313	0.6	0.362	0.383	cytoplasm	GO:0008152 metabolic process;		GO:0016787 hydrolase activity; GO:0003824 catalytic activity;				IPR029058; IPR013094;	Alpha/Beta hydrolase fold; Alpha/beta hydrolase fold-3;
RchiOBHm_Chr4g0419721	Putative translation elongation factor EF1B/ribosomal protein S6	0.619	Down	0.0077222	---	69.8	24.36	125	16	15	22	21	23	18	22	19	16	16	16	16	16	14	15	15	15	15	15	13	12773000	12735000	12543000	8181800	8175800	7210600	1.244	1.24	1.221	0.797	0.796	0.702	cytoplasm	GO:0006518 peptide metabolic process; GO:0006414 translational elongation; GO:0043043 peptide biosynthetic process; GO:0044267 cellular protein metabolic process; GO:0006807 nitrogen compound metabolic process; GO:0009058 biosynthetic process; GO:0043603 cellular amide metabolic process; GO:0044238 primary metabolic process; GO:1901566 organonitrogen compound biosynthetic process; GO:1901576 orga…	GO:0044464 cell part; GO:0005622 intracellular; GO:0005737 cytoplasm; GO:0032991 macromolecular complex; GO:0044424 intracellular part; GO:0043234 protein complex; GO:0005623 cell; GO:0044444 cytoplasmic part; GO:0005853 eukaryotic translation elongation factor 1 complex;	GO:0097159 organic cyclic compound binding; GO:1901363 heterocyclic compound binding; GO:0003723 RNA binding; GO:0008135 translation factor activity, RNA binding; GO:0003746 translation elongation factor activity; GO:0005488 binding; GO:0003676 nucleic acid binding;	K03232	EEF1B; elongation factor 1-beta		IPR014717; IPR014038; IPR010987;	Translation elongation factor EF1B/ribosomal protein S6; Translation elongation factor EF1B, beta/delta subunit, guanine nucleotide exchange domain; Glutathione S-transferase, C-terminal-like;
RchiOBHm_Chr4g0421511	Putative protein kinase RLK-Pelle-RLCK-IXa family	0.506	Down	0.0072774	---	11.5	41.119	10	3	3	2	3	3	0	1	1	3	3	3	1	2	2	3	3	3	1	2	2	80633	86990	75065	0	45808	35999	1.242	1.34	1.157		0.706	0.555	chloroplast	GO:0016310 phosphorylation; GO:0044267 cellular protein metabolic process; GO:0044238 primary metabolic process; GO:0044237 cellular metabolic process; GO:0006796 phosphate-containing compound metabolic process; GO:0071704 organic substance metabolic process; GO:0008152 metabolic process; GO:0006468 protein phosphorylation; GO:0006793 phosphorus metabolic process; GO:0044260 cellular macromolecul…		GO:0005524 ATP binding; GO:1901265 nucleoside phosphate binding; GO:0016773 phosphotransferase activity, alcohol group as acceptor; GO:0001882 nucleoside binding; GO:0043167 ion binding; GO:0004672 protein kinase activity; GO:0000166 nucleotide binding; GO:0097159 organic cyclic compound binding; GO:1901363 heterocyclic compound binding; GO:0032549 ribonucleoside binding; GO:0097367 carbohydrate …				IPR000719; IPR001245; IPR013320; IPR011009;	Protein kinase domain; Serine-threonine/tyrosine-protein kinase catalytic domain; Concanavalin A-like lectin/glucanase domain; Protein kinase-like domain;
RchiOBHm_Chr4g0422251	Putative xyloglucan 6-xylosyltransferase	0.605	Down	0.0026634	---	35.4	50.212	65	11	10	11	12	13	9	9	11	11	10	11	9	8	9	10	9	10	8	7	8	1388100	1444600	1392600	928500	730590	900130	1.228	1.278	1.232	0.821	0.646	0.796	mitochondria		GO:0031224 intrinsic component of membrane; GO:0016020 membrane; GO:0016021 integral component of membrane; GO:0044425 membrane part;	GO:0016757 transferase activity, transferring glycosyl groups; GO:0003824 catalytic activity; GO:0016740 transferase activity;	K08238	XXT; xyloglucan 6-xylosyltransferase [EC:2.4.2.39]
RchiOBHm_Chr4g0422421	Putative plus-end-directed kinesin ATPase	0.353	Down	0.049222	---	16.3	93.107	29	9	9	7	7	8	3	3	1	9	9	9	7	8	6	9	9	9	7	8	6	421480	316420	356400	181100	156050	48789	1.708	1.283	1.445	0.734	0.633	0.198	nucleus	GO:0044763 single-organism cellular process; GO:0007018 microtubule-based movement; GO:0006928 movement of cell or subcellular component; GO:0044699 single-organism process; GO:0009987 cellular process; GO:0007017 microtubule-based process;		GO:0003774 motor activity; GO:1901265 nucleoside phosphate binding; GO:0016817 hydrolase activity, acting on acid anhydrides; GO:0005515 protein binding; GO:0016787 hydrolase activity; GO:0097159 organic cyclic compound binding; GO:1901363 heterocyclic compound binding; GO:0008092 cytoskeletal protein binding; GO:0016462 pyrophosphatase activity; GO:0003824 catalytic activity; GO:0032553 ribonucl…	K10393	KIF2_24, MCAK; kinesin family member 2/24		IPR027417; IPR001752;	P-loop containing nucleoside triphosphate hydrolase; Kinesin motor domain;
RchiOBHm_Chr4g0425671	Putative serine/threonine-protein phosphatase with EF-hands	6.426	Up	0.0031247	---	47.8	17.086	11	4	4	1	0	0	3	3	4	3	2	1	4	3	4	3	2	1	4	3	4	30015	21308	0	178260	125420	191560	0.275	0.195		1.631	1.147	1.752	chloroplast			GO:0043169 cation binding; GO:0046872 metal ion binding; GO:0005509 calcium ion binding; GO:0005488 binding; GO:0043167 ion binding;	K02183	CALM; calmodulin	mdm04016 MAPK signaling pathway - plant - Malus domestica (apple); mdm04070 Phosphatidylinositol signaling system - Malus domestica (apple); mdm04626 Plant-pathogen interaction - Malus domestica (apple);	IPR002048; IPR011992;	EF-hand domain; EF-hand domain pair;
RchiOBHm_Chr4g0424121	"Putative START-like domain, Bet v I type allergen"	0.644	Down	0.0051995	---	58	17.336	22	7	3	3	6	6	2	2	3	7	7	7	6	5	6	3	3	3	2	1	2	411450	523390	428440	306040	291480	280560	1.101	1.401	1.147	0.819	0.78	0.751	cytoplasm	GO:0006952 defense response; GO:0050896 response to stimulus; GO:0006950 response to stress; GO:0009607 response to biotic stimulus;						IPR000916; IPR023393;	Bet v I/Major latex protein; START-like domain;
RchiOBHm_Chr4g0427421	Putative [Pyruvate dehydrogenase (acetyl-transferring)] kinase	1.817	Up	0.0047835	---	30.1	41.911	34	7	7	5	4	3	7	7	8	7	7	5	7	7	7	7	7	5	7	7	7	308700	278230	265250	460910	470310	617130	0.772	0.695	0.663	1.152	1.176	1.542	cytoplasm	GO:0016310 phosphorylation; GO:0008152 metabolic process; GO:0044237 cellular metabolic process; GO:0006793 phosphorus metabolic process; GO:0009987 cellular process; GO:0006796 phosphate-containing compound metabolic process;		GO:0003824 catalytic activity; GO:0016740 transferase activity; GO:0016772 transferase activity, transferring phosphorus-containing groups;	K00898	PDK2_3_4; pyruvate dehydrogenase kinase 2/3/4 [EC:2.7.11.2]		IPR005467; IPR003594; IPR018955; IPR004358;	Histidine kinase domain; Histidine kinase-like ATPase, C-terminal domain; Branched-chain alpha-ketoacid dehydrogenase kinase/Pyruvate dehydrogenase kinase, N-terminal; Signal transduction histidine kinase-related protein, C-terminal;
RchiOBHm_Chr4g0428351	"Putative xyloglucan:xyloglucosyl transferase, Xyloglucan-specific endo-beta-1,4-glucanase"	3.323	Up	6.1281e-05	---	53	38.159	172	24	24	20	20	18	38	36	40	19	21	22	24	24	24	19	21	22	24	24	24	10411000	9959600	10269000	33820000	30069000	37929000	0.472	0.451	0.465	1.532	1.362	1.718	chloroplast	GO:0044085 cellular component biogenesis; GO:0006073 cellular glucan metabolic process; GO:0044036 cell wall macromolecule metabolic process; GO:0044042 glucan metabolic process; GO:0005975 carbohydrate metabolic process; GO:0044238 primary metabolic process; GO:0044237 cellular metabolic process; GO:0010410 hemicellulose metabolic process; GO:0044264 cellular polysaccharide metabolic process; GO…	GO:0048046 apoplast; GO:0030312 external encapsulating structure; GO:0044464 cell part; GO:0071944 cell periphery; GO:0005618 cell wall; GO:0005623 cell; GO:0005576 extracellular region;	GO:0016762 xyloglucan:xyloglucosyl transferase activity; GO:0016758 transferase activity, transferring hexosyl groups; GO:0003824 catalytic activity; GO:0016798 hydrolase activity, acting on glycosyl bonds; GO:0004553 hydrolase activity, hydrolyzing O-glycosyl compounds; GO:0016757 transferase activity, transferring glycosyl groups; GO:0016787 hydrolase activity; GO:0016740 transferase activity;	K08235	E2.4.1.207; xyloglucan:xyloglucosyl transferase [EC:2.4.1.207]		IPR010713; IPR013320; IPR000757;	Xyloglucan endo-transglycosylase, C-terminal; Concanavalin A-like lectin/glucanase domain; Glycoside hydrolase family 16;
RchiOBHm_Chr4g0424501	Putative PH domain-containing protein	0.548	Down	0.00047854	---	11.6	99.399	12	7	5	2	3	4	1	1	1	5	6	6	5	6	6	5	5	5	4	5	4	124730	108020	128990	66889	63622	67666	1.337	1.158	1.382	0.717	0.682	0.725	nucleus			GO:0005488 binding;	K17491	SMEK, PPP4R3; protein phosphatase 4 regulatory subunit 3		IPR011993; IPR016024; IPR006887;	PH domain-like; Armadillo-type fold; Domain of unknown function DUF625;
RchiOBHm_Chr4g0430241	Putative chlorophyll A-B binding protein	1.564	Up	0.0062998	---	21.3	28.741	13	3	3	2	2	1	3	3	2	3	2	2	3	3	2	3	2	2	3	3	2	35807	42111	32509	54290	56185	62295	0.759	0.892	0.689	1.15	1.19	1.32	chloroplast				K08908	LHCA2; light-harvesting complex I chlorophyll a/b binding protein 2	mdm00196 Photosynthesis - antenna proteins - Malus domestica (apple); mdm01100 Metabolic pathways - Malus domestica (apple);	IPR023329;	Chlorophyll a/b binding protein domain;
RchiOBHm_Chr4g0424861	Putative aldehyde dehydrogenase (NAD(+))	0.605	Down	0.0022843	---	32.4	66.442	42	12	12	8	8	10	7	5	4	11	9	12	10	8	10	11	9	12	10	8	10	431140	451750	418180	286920	272670	228040	1.238	1.298	1.201	0.824	0.783	0.655	vacuolar membrane	GO:0044699 single-organism process; GO:0008152 metabolic process; GO:0055114 oxidation-reduction process; GO:0044710 single-organism metabolic process;		GO:0016620 oxidoreductase activity, acting on the aldehyde or oxo group of donors, NAD or NADP as acceptor; GO:0003824 catalytic activity; GO:0016491 oxidoreductase activity; GO:0016903 oxidoreductase activity, acting on the aldehyde or oxo group of donors;				IPR016161; IPR015590; IPR016162; IPR016163;	Aldehyde/histidinol dehydrogenase; Aldehyde dehydrogenase domain; Aldehyde dehydrogenase N-terminal domain; Aldehyde dehydrogenase, C-terminal;
RchiOBHm_Chr4g0430671	"Putative transferase, protein kinase RLK-Pelle-LRR-III family"	1.678	Up	0.0048807	---	22.1	76.906	43	8	8	9	6	4	7	7	10	7	6	7	6	8	8	7	6	7	6	8	8	163380	159820	123900	264070	241010	245220	0.819	0.801	0.621	1.323	1.208	1.229	plasma membrane	GO:0016310 phosphorylation; GO:0044267 cellular protein metabolic process; GO:0044238 primary metabolic process; GO:0044237 cellular metabolic process; GO:0006796 phosphate-containing compound metabolic process; GO:0071704 organic substance metabolic process; GO:0008152 metabolic process; GO:0006468 protein phosphorylation; GO:0006793 phosphorus metabolic process; GO:0044260 cellular macromolecul…		GO:0005524 ATP binding; GO:1901265 nucleoside phosphate binding; GO:0016773 phosphotransferase activity, alcohol group as acceptor; GO:0001882 nucleoside binding; GO:0043167 ion binding; GO:0005515 protein binding; GO:0004672 protein kinase activity; GO:0000166 nucleotide binding; GO:0097159 organic cyclic compound binding; GO:1901363 heterocyclic compound binding; GO:0032549 ribonucleoside bindi…				IPR000719; IPR013210; IPR032675; IPR011009;	Protein kinase domain; Leucine-rich repeat-containing N-terminal, plant-type; Leucine-rich repeat domain, L domain-like; Protein kinase-like domain;
RchiOBHm_Chr4g0430761	Putative geraniol 8-hydroxylase	7.063	Up	0.0067779	---	33.5	56.088	32	12	12	1	0	0	11	10	10	7	5	6	12	12	11	7	5	6	12	12	11	64673	54585	19013	343550	254560	377380	0.348	0.294	0.102	1.851	1.371	2.033	chloroplast	GO:0044699 single-organism process; GO:0008152 metabolic process; GO:0055114 oxidation-reduction process; GO:0044710 single-organism metabolic process;		GO:0097159 organic cyclic compound binding; GO:1901363 heterocyclic compound binding; GO:0020037 heme binding; GO:0005506 iron ion binding; GO:0046914 transition metal ion binding; GO:0003824 catalytic activity; GO:0005488 binding; GO:0043167 ion binding; GO:0043169 cation binding; GO:0046872 metal ion binding; GO:0016705 oxidoreductase activity, acting on paired donors, with incorporation or red…
RchiOBHm_Chr4g0425951	Putative N-acetylneuraminate 7-O(or 9-O)-acetyltransferase	0.645	Down	0.0027789	---	8.6	63.48	29	5	5	5	5	5	5	5	4	4	4	5	5	5	4	4	4	5	5	5	4	280580	279140	232990	166140	165850	179370	1.291	1.284	1.072	0.764	0.763	0.825	plasma membrane				K03377	CASD1; N-acetylneuraminate 9-O-acetyltransferase [EC:2.3.1.45]		IPR012419;	Cas1p 10 TM acyl transferase domain;
RchiOBHm_Chr4g0428041	Putative pectinacetylesterase/NOTUM	0.496	Down	0.0103388	---	18.2	46.697	12	5	5	4	4	1	1	1	1	5	4	5	4	4	3	5	4	5	4	4	3	89767	87136	57240	41459	37680	37025	1.538	1.492	0.98	0.71	0.645	0.634	chloroplast			GO:0016787 hydrolase activity; GO:0003824 catalytic activity;	K19882	NOTUM; O-palmitoleoyl-L-serine hydrolase [EC:3.1.1.98]
RchiOBHm_Chr4g0428991	Putative Arf GTPase activating protein	0.597	Down	0.00053896	---	3.4	92.849	7	2	2	2	2	2	1	0	0	2	2	2	2	2	2	2	2	2	2	2	2	35389	34918	31370	19686	19370	21602	1.308	1.291	1.159	0.728	0.716	0.798	nucleus		GO:0044424 intracellular part; GO:0005623 cell; GO:0044464 cell part; GO:0005622 intracellular; GO:0005737 cytoplasm;	GO:0030234 enzyme regulator activity; GO:0060589 nucleoside-triphosphatase regulator activity; GO:0005488 binding; GO:0030695 GTPase regulator activity; GO:0005515 protein binding; GO:0098772 molecular function regulator; GO:0008047 enzyme activator activity; GO:0005096 GTPase activator activity;	K12489	ACAP; Arf-GAP with coiled-coil, ANK repeat and PH domain-containing protein	mdm04144 Endocytosis - Malus domestica (apple);	IPR027267; IPR011993; IPR020683; IPR004148; IPR001849;	Arfaptin homology (AH) domain/BAR domain; PH domain-like; Ankyrin repeat-containing domain; BAR domain; Pleckstrin homology domain;
RchiOBHm_Chr4g0429091	PREDICTED: coiled-coil domain-containing protein SCD2 [Fragaria vesca subsp. vesca]	0.171	Down	0.00101592	---	18.8	61.194	16	6	5	4	5	4	1	1	1	5	6	6	4	3	2	4	5	5	3	3	2	169100	139940	156490	33081	29503	17134	1.861	1.54	1.722	0.364	0.325	0.189	nucleus
RchiOBHm_Chr4g0429521	Putative protein kinase RLK-Pelle-RLCK-VIIa-1 family	0.354	Down	0.00111542	---	11	52.323	7	3	3	2	2	3	0	0	0	3	2	3	2	2	2	3	2	3	2	2	2	47698	32382	43540	15298	13603	14918	1.709	1.16	1.56	0.548	0.487	0.535	cytoplasm	GO:0016310 phosphorylation; GO:0044267 cellular protein metabolic process; GO:0044238 primary metabolic process; GO:0044237 cellular metabolic process; GO:0006796 phosphate-containing compound metabolic process; GO:0071704 organic substance metabolic process; GO:0008152 metabolic process; GO:0006468 protein phosphorylation; GO:0006793 phosphorus metabolic process; GO:0044260 cellular macromolecul…		GO:0005524 ATP binding; GO:1901265 nucleoside phosphate binding; GO:0016773 phosphotransferase activity, alcohol group as acceptor; GO:0001882 nucleoside binding; GO:0043167 ion binding; GO:0004672 protein kinase activity; GO:0000166 nucleotide binding; GO:0097159 organic cyclic compound binding; GO:1901363 heterocyclic compound binding; GO:0032549 ribonucleoside binding; GO:0097367 carbohydrate …	K13430	PBS1; serine/threonine-protein kinase PBS1 [EC:2.7.11.1]	mdm04626 Plant-pathogen interaction - Malus domestica (apple);	IPR000719; IPR013320; IPR011009;	Protein kinase domain; Concanavalin A-like lectin/glucanase domain; Protein kinase-like domain;
RchiOBHm_Chr4g0429561	PREDICTED: formin-like protein 3 [Fragaria vesca subsp. vesca]	0.203	Down	0.0109031	---	11.6	35.643	7	2	2	1	2	2	1	0	1	1	2	2	2	2	2	1	2	2	2	2	2	0	104100	119440	18861	33265	16070		1.784	2.047	0.323	0.57	0.275	chloroplast
RchiOBHm_Chr4g0429961	Putative transcription factor CG1-CAMTA family	0.42	Down	0.0021768	---	8.9	112.18	16	6	6	4	3	4	1	2	2	6	5	4	5	6	5	6	5	4	5	6	5	151750	123560	133090	45646	65476	60435	1.57	1.278	1.377	0.472	0.677	0.625	nucleus		GO:0043226 organelle; GO:0043231 intracellular membrane-bounded organelle; GO:0043229 intracellular organelle; GO:0005634 nucleus; GO:0044464 cell part; GO:0005622 intracellular; GO:0044424 intracellular part; GO:0043227 membrane-bounded organelle; GO:0005623 cell;	GO:0097159 organic cyclic compound binding; GO:1901363 heterocyclic compound binding; GO:0003677 DNA binding; GO:0005515 protein binding; GO:0005488 binding; GO:0003676 nucleic acid binding;	K21596	CAMTA; calmodulin-binding transcription activator		IPR013783; IPR020683; IPR014756; IPR027417; IPR005559; IPR002909;	Immunoglobulin-like fold; Ankyrin repeat-containing domain; Immunoglobulin E-set; P-loop containing nucleoside triphosphate hydrolase; CG-1 DNA-binding domain; IPT domain;
RchiOBHm_Chr4g0431091	Putative tetrahydroberberine oxidase	2.706	Up	0.022839	---	20.5	58.938	25	7	3	3	4	3	4	5	6	6	7	6	6	6	6	3	3	3	3	3	3	265810	167390	166460	557400	546880	518830	0.718	0.452	0.449	1.505	1.476	1.4	chloroplast	GO:0044699 single-organism process; GO:0008152 metabolic process; GO:0055114 oxidation-reduction process; GO:0044710 single-organism metabolic process;		GO:0097159 organic cyclic compound binding; GO:1901363 heterocyclic compound binding; GO:0016614 oxidoreductase activity, acting on CH-OH group of donors; GO:1901265 nucleoside phosphate binding; GO:0050660 flavin adenine dinucleotide binding; GO:0003824 catalytic activity; GO:0005488 binding; GO:0043167 ion binding; GO:0043168 anion binding; GO:0000166 nucleotide binding; GO:0048037 cofactor bin…				IPR016166; IPR016169; IPR012951; IPR006094; IPR016167;	FAD-binding, type 2; CO dehydrogenase flavoprotein-like, FAD-binding, subdomain 2; Berberine/berberine-like; FAD linked oxidase, N-terminal; FAD-binding, type 2, subdomain 1;
RchiOBHm_Chr4g0432641	Putative cellulase	2.255	Up	0.00134197	---	25.9	58.523	25	8	8	3	2	3	6	4	7	5	4	6	7	7	7	5	4	6	7	7	7	81268	89823	67438	182860	159740	194940	0.628	0.694	0.521	1.414	1.235	1.507	vacuolar membrane	GO:0008152 metabolic process; GO:0005975 carbohydrate metabolic process; GO:0044238 primary metabolic process; GO:0071704 organic substance metabolic process;		GO:0004553 hydrolase activity, hydrolyzing O-glycosyl compounds; GO:0016787 hydrolase activity; GO:0003824 catalytic activity; GO:0016798 hydrolase activity, acting on glycosyl bonds;				IPR000772; IPR001547; IPR017853; IPR013781;	Ricin B, lectin domain; Glycoside hydrolase, family 5; Glycoside hydrolase superfamily; Glycoside hydrolase, catalytic domain;
RchiOBHm_Chr4g0430161	Putative bifunctional inhibitor/plant lipid transfer protein/seed storage helical	0.574	Down	0.0140369	---	24.2	18.86	14	4	4	3	1	4	1	4	1	4	3	4	4	4	4	4	3	4	4	4	4	482640	375070	554060	297290	239460	274140	1.303	1.012	1.496	0.803	0.646	0.74	vacuolar membrane							IPR016140;	Bifunctional inhibitor/plant lipid transfer protein/seed storage helical domain;
RchiOBHm_Chr4g0430281	Putative rubber elongation factor	0.241	Down	4.2304e-05	---	54.7	25.633	47	9	9	9	10	11	5	6	6	9	9	9	6	7	7	9	9	9	6	7	7	2335900	2138200	2216100	493210	615260	506040	1.688	1.545	1.601	0.356	0.445	0.366	cytoplasm
RchiOBHm_Chr4g0432941	Putative peptide-transporting ATPase	2	Up	0.042059	---	4.1	78.822	7	2	2	1	0	1	2	1	2	2	2	2	2	2	2	2	2	2	2	2	2	19077	13290	12777	21864	26846	41588	0.845	0.589	0.566	0.969	1.189	1.842	chloroplast	GO:0006810 transport; GO:0055085 transmembrane transport; GO:0051179 localization; GO:0051234 establishment of localization;	GO:0031224 intrinsic component of membrane; GO:0016020 membrane; GO:0016021 integral component of membrane; GO:0044425 membrane part;	GO:1901265 nucleoside phosphate binding; GO:0015399 primary active transmembrane transporter activity; GO:0016817 hydrolase activity, acting on acid anhydrides; GO:0016787 hydrolase activity; GO:0016887 ATPase activity; GO:0097159 organic cyclic compound binding; GO:1901363 heterocyclic compound binding; GO:0016462 pyrophosphatase activity; GO:0003824 catalytic activity; GO:0032553 ribonucleotide…	K05656	ABCB9, TAPL; ATP-binding cassette, subfamily B (MDR/TAP), member 9	mdm02010 ABC transporters - Malus domestica (apple);	IPR003593; IPR003439; IPR027417; IPR011527;	AAA+ ATPase domain; ABC transporter-like; P-loop containing nucleoside triphosphate hydrolase; ABC transporter type 1, transmembrane domain;
RchiOBHm_Chr4g0438121	"Putative ATPase, AAA-type, core, P-loop containing nucleoside triphosphate hydrolase"	1.564	Up	0.02146	---	8.5	60.049	4	3	3	0	0	0	0	2	2	3	2	3	3	3	2	3	2	3	3	3	2	26497	31311	22724	35746	46716	43547	0.77	0.91	0.66	1.038	1.357	1.265	cytoplasm			GO:0005524 ATP binding; GO:1901265 nucleoside phosphate binding; GO:0001882 nucleoside binding; GO:0043167 ion binding; GO:0000166 nucleotide binding; GO:0097159 organic cyclic compound binding; GO:1901363 heterocyclic compound binding; GO:0032549 ribonucleoside binding; GO:0097367 carbohydrate derivative binding; GO:0032553 ribonucleotide binding; GO:0005488 binding; GO:0032550 purine ribonucleo…				IPR003593; IPR003959; IPR027417;	AAA+ ATPase domain; ATPase, AAA-type, core; P-loop containing nucleoside triphosphate hydrolase;
RchiOBHm_Chr4g0430941	Putative linoleate 13S-lipoxygenase	0.565	Down	0.00035754	---	57.7	103.72	186	34	32	37	33	32	30	28	26	33	34	33	32	29	30	31	32	31	30	27	28	4639900	4269800	4322900	2711300	2357500	2404900	1.344	1.237	1.253	0.786	0.683	0.697	chloroplast	GO:0044699 single-organism process; GO:0008152 metabolic process; GO:0055114 oxidation-reduction process; GO:0044710 single-organism metabolic process;		GO:0016702 oxidoreductase activity, acting on single donors with incorporation of molecular oxygen, incorporation of two atoms of oxygen; GO:0016701 oxidoreductase activity, acting on single donors with incorporation of molecular oxygen; GO:0003824 catalytic activity; GO:0005488 binding; GO:0051213 dioxygenase activity; GO:0043167 ion binding; GO:0043169 cation binding; GO:0046872 metal ion bindi…	K00454	LOX2S; lipoxygenase [EC:1.13.11.12]	mdm00591 Linoleic acid metabolism - Malus domestica (apple); mdm00592 alpha-Linolenic acid metabolism - Malus domestica (apple); mdm01100 Metabolic pathways - Malus domestica (apple); mdm01110 Biosynthesis of secondary metabolites - Malus domestica (apple);	IPR027433; IPR001024; IPR013819;	Lipoxygenase, domain 3; PLAT/LH2 domain; Lipoxygenase, C-terminal;
RchiOBHm_Chr4g0432081	Putative very-long-chain 3-oxoacyl-CoA reductase	0.591	Down	0.0138241	---	19.3	36.092	10	4	4	2	3	2	2	0	1	3	4	3	3	2	3	3	4	3	3	2	3	84417	71690	70003	48543	0	40605	1.339	1.137	1.11	0.77		0.644	chloroplast				K10251	HSD17B12, KAR, IFA38; 17beta-estradiol 17-dehydrogenase / very-long-chain 3-oxoacyl-CoA reductase [EC:1.1.1.62 1.1.1.330]	mdm00062 Fatty acid elongation - Malus domestica (apple); mdm01040 Biosynthesis of unsaturated fatty acids - Malus domestica (apple); mdm01100 Metabolic pathways - Malus domestica (apple); mdm01110 Biosynthesis of secondary metabolites - Malus domestica (apple); mdm01212 Fatty acid metabolism - Malus domestica (apple);	IPR016040;	NAD(P)-binding domain;
RchiOBHm_Chr4g0433251	"Putative alpha-glucan, water dikinase"	0.63	Down	0.0026377	---	33.2	156.38	132	32	32	30	25	22	22	20	13	31	30	30	27	28	26	31	30	30	27	28	26	2223700	2189800	1828800	1332800	1360200	1239000	1.311	1.291	1.078	0.786	0.802	0.731	chloroplast	GO:0016310 phosphorylation; GO:0008152 metabolic process; GO:0044237 cellular metabolic process; GO:0006793 phosphorus metabolic process; GO:0009987 cellular process; GO:0006796 phosphate-containing compound metabolic process;		GO:0005524 ATP binding; GO:1901265 nucleoside phosphate binding; GO:0001882 nucleoside binding; GO:0043167 ion binding; GO:0000166 nucleotide binding; GO:0097159 organic cyclic compound binding; GO:1901363 heterocyclic compound binding; GO:0032549 ribonucleoside binding; GO:0097367 carbohydrate derivative binding; GO:0016301 kinase activity; GO:0003824 catalytic activity; GO:0032553 ribonucleotid…	K08244	R1; alpha-glucan, water dikinase [EC:2.7.9.4]		IPR002192; IPR013816; IPR013815;	Pyruvate phosphate dikinase, PEP/pyruvate-binding; ATP-grasp fold, subdomain 2; ATP-grasp fold, subdomain 1;
RchiOBHm_Chr4g0433691	"Putative microtubule-associated protein, MAP65/Ase1/PRC1"	0.531	Down	0.0050632	---	13.6	68.102	18	6	5	4	2	4	3	2	3	4	4	5	4	3	4	4	3	5	4	3	4	119860	122600	120480	61968	70154	60767	1.294	1.323	1.301	0.669	0.757	0.656	cytoplasm				K16732	PRC1; protein regulator of cytokinesis 1
RchiOBHm_Chr4g0438301	Putative phosphodiesterase I	1.576	Up	0.047859	---	17.3	68.422	19	7	7	2	2	1	3	5	6	5	5	3	4	6	5	5	5	3	4	6	5	152500	165160	99235	241480	197890	217890	0.852	0.923	0.554	1.349	1.105	1.217	vacuolar membrane			GO:0003993 acid phosphatase activity; GO:0042578 phosphoric ester hydrolase activity; GO:0003824 catalytic activity; GO:0016791 phosphatase activity; GO:0005488 binding; GO:0016788 hydrolase activity, acting on ester bonds; GO:0043167 ion binding; GO:0043169 cation binding; GO:0046872 metal ion binding; GO:0016787 hydrolase activity;	K22390			IPR029052; IPR015914; IPR004843; IPR025733; IPR008963;	Metallo-dependent phosphatase-like; Purple acid phosphatase, N-terminal; Calcineurin-like phosphoesterase domain, ApaH type; Iron/zinc purple acid phosphatase-like C-terminal domain; Purple acid phosphatase-like, N-terminal;
RchiOBHm_Chr4g0433701	Putative zinc/iron permease	0.503	Down	4.1811e-05	---	15.9	50.983	34	7	7	6	7	7	5	6	3	7	7	7	7	7	7	7	7	7	7	7	7	618530	603410	562030	307580	302690	286290	1.384	1.351	1.258	0.688	0.678	0.641	plasma membrane	GO:0006810 transport; GO:0055085 transmembrane transport; GO:0006812 cation transport; GO:0030001 metal ion transport; GO:0006811 ion transport; GO:0051179 localization; GO:0051234 establishment of localization;	GO:0016020 membrane;	GO:0046873 metal ion transmembrane transporter activity; GO:0015075 ion transmembrane transporter activity; GO:0022892 substrate-specific transporter activity; GO:0022890 inorganic cation transmembrane transporter activity; GO:0008324 cation transmembrane transporter activity; GO:0022891 substrate-specific transmembrane transporter activity; GO:0005215 transporter activity; GO:0022857 transmembra…	K14713	SLC39A7, KE4, ZIP7; solute carrier family 39 (zinc transporter), member 7
RchiOBHm_Chr4g0434361	Putative PB1 domain-containing protein	0.646	Down	0.0098425	---	19.2	77.493	28	8	8	6	6	5	3	4	4	7	8	8	5	6	7	7	8	8	5	6	7	360430	340250	299370	216100	243590	186310	1.314	1.24	1.091	0.788	0.888	0.679	nucleus			GO:0005515 protein binding; GO:0005488 binding;				IPR000270;	PB1 domain;
RchiOBHm_Chr4g0439541	Putative expansin/Lol pI	2.007	Up	0.021296	---	14.9	31.94	9	3	3	1	2	1	2	1	2	3	3	3	3	3	3	3	3	3	3	3	3	55942	53962	37886	115910	73315	107370	0.755	0.729	0.512	1.565	0.99	1.45	chloroplast	GO:0071554 cell wall organization or biogenesis; GO:0009664 plant-type cell wall organization; GO:0016043 cellular component organization; GO:0071555 cell wall organization; GO:0045229 external encapsulating structure organization; GO:0009987 cellular process; GO:0071669 plant-type cell wall organization or biogenesis; GO:0071840 cellular component organization or biogenesis;	GO:0005576 extracellular region;		K20628	exlX; expansin		IPR009009; IPR007112; IPR007117;	RlpA-like protein, double-psi beta-barrel domain; Expansin/pollen allergen, DPBB domain; Expansin, cellulose-binding-like domain;
RchiOBHm_Chr4g0435691	Putative metallo-beta-lactamase	0.609	Down	0.027778	---	22.6	38.329	22	4	4	5	4	4	3	2	4	4	4	4	4	4	4	4	4	4	4	4	4	123990	146730	140380	98922	89728	61811	1.125	1.331	1.273	0.897	0.814	0.561	chloroplast							IPR001279;	Metallo-beta-lactamase;
RchiOBHm_Chr4g0439661	"Putative long-chain-alcohol oxidase, FAD/NAD(P)-binding domain-containing protein"	8.404	Up	0.0043212	---	22	57.568	13	6	4	0	0	1	4	4	4	2	4	3	5	6	6	1	3	1	4	4	4	10123	15822	21959	75841	201780	125040	0.135	0.211	0.292	1.01	2.687	1.665	extracellular	GO:0044699 single-organism process; GO:0008152 metabolic process; GO:0055114 oxidation-reduction process; GO:0044710 single-organism metabolic process;		GO:0097159 organic cyclic compound binding; GO:1901363 heterocyclic compound binding; GO:0016614 oxidoreductase activity, acting on CH-OH group of donors; GO:1901265 nucleoside phosphate binding; GO:0050660 flavin adenine dinucleotide binding; GO:0003824 catalytic activity; GO:0005488 binding; GO:0043167 ion binding; GO:0043168 anion binding; GO:0000166 nucleotide binding; GO:0048037 cofactor bin…				IPR000172; IPR007867; IPR023753;	Glucose-methanol-choline oxidoreductase, N-terminal; Glucose-methanol-choline oxidoreductase, C-terminal; FAD/NAD(P)-binding domain;
RchiOBHm_Chr4g0437121	Putative Heat shock protein Hsp90 family	0.423	Down	0.0023425	---	57.5	89.892	157	39	34	31	29	32	19	25	21	36	38	39	32	32	34	31	33	34	28	29	30	4975000	4448900	5612200	2260300	2397800	1698200	1.395	1.248	1.574	0.634	0.673	0.476	chloroplast	GO:0006457 protein folding; GO:0006950 response to stress; GO:0050896 response to stimulus; GO:0009987 cellular process;		GO:0005524 ATP binding; GO:1901265 nucleoside phosphate binding; GO:0001882 nucleoside binding; GO:0043167 ion binding; GO:0005515 protein binding; GO:0000166 nucleotide binding; GO:0097159 organic cyclic compound binding; GO:1901363 heterocyclic compound binding; GO:0032549 ribonucleoside binding; GO:0097367 carbohydrate derivative binding; GO:0032553 ribonucleotide binding; GO:0005488 binding; …	K09487	HSP90B, TRA1; heat shock protein 90kDa beta	mdm04141 Protein processing in endoplasmic reticulum - Malus domestica (apple); mdm04626 Plant-pathogen interaction - Malus domestica (apple);	IPR020568; IPR020575; IPR003594;	Ribosomal protein S5 domain 2-type fold; Heat shock protein Hsp90, N-terminal; Histidine kinase-like ATPase, C-terminal domain;
RchiOBHm_Chr4g0442771	"Putative CRAL-TRIO lipid binding domain, CRAL/TRIO domain-containing protein"	2.731	Up	0.0027761	---	14	27.864	6	3	3	0	0	0	2	2	2	2	3	0	2	3	2	2	3	0	2	3	2	13464	11315	0	37850	33928	29841	0.533	0.448		1.497	1.342	1.18	cytoplasm							IPR001251; IPR011074;	CRAL-TRIO lipid binding domain; CRAL/TRIO, N-terminal domain;
RchiOBHm_Chr4g0438711	Putative non-specific serine/threonine protein kinase	0.637	Down	0.0030791	---	37.3	37.044	42	10	10	7	7	8	6	8	6	9	9	9	10	9	7	9	9	9	10	9	7	961030	787280	957370	557290	563620	602330	1.302	1.067	1.297	0.755	0.764	0.816	vacuolar membrane			GO:0005515 protein binding; GO:0005488 binding;				IPR032675;	Leucine-rich repeat domain, L domain-like;
RchiOBHm_Chr4g0439011	Putative translation elongation factor IF5A	0.438	Down	0.0039351	---	62.9	17.455	31	8	5	6	5	5	5	5	5	8	8	7	8	7	7	5	5	5	5	5	5	1739100	1658600	1424000	684130	867620	560360	1.505	1.435	1.232	0.592	0.751	0.485	cytoplasm	GO:0032270 positive regulation of cellular protein metabolic process; GO:0006518 peptide metabolic process; GO:0010608 posttranscriptional regulation of gene expression; GO:0043243 positive regulation of protein complex disassembly; GO:0006449 regulation of translational termination; GO:0009891 positive regulation of biosynthetic process; GO:0009058 biosynthetic process; GO:0044237 cellular metab…		GO:0097159 organic cyclic compound binding; GO:1901363 heterocyclic compound binding; GO:0043022 ribosome binding; GO:0008135 translation factor activity, RNA binding; GO:0003723 RNA binding; GO:0003746 translation elongation factor activity; GO:0005488 binding; GO:0003676 nucleic acid binding; GO:0044877 macromolecular complex binding; GO:0043021 ribonucleoprotein complex binding;	K03263	EIF5A; translation initiation factor 5A		IPR008991; IPR012340; IPR014722; IPR020189;	Translation protein SH3-like domain; Nucleic acid-binding, OB-fold; Ribosomal protein L2 domain 2; Translation elongation factor, IF5A C-terminal;
RchiOBHm_Chr4g0439831	Putative apyrase	0.482	Down	0.0033792	---	15.2	60.044	17	5	5	3	3	3	3	3	2	3	4	4	4	5	3	3	4	4	4	5	3	130620	110080	104570	58537	62463	45421	1.532	1.291	1.226	0.686	0.732	0.533	plasma membrane			GO:0016787 hydrolase activity; GO:0003824 catalytic activity;	K01510	ENTPD1_3_8, CD39; apyrase [EC:3.6.1.5]	mdm00230 Purine metabolism - Malus domestica (apple); mdm00240 Pyrimidine metabolism - Malus domestica (apple); mdm01100 Metabolic pathways - Malus domestica (apple);
RchiOBHm_Chr4g0439921	Putative S-adenosyl-L-methionine-dependent methyltransferase	0.583	Down	0.00069678	---	61	68.501	160	31	23	31	31	28	25	20	25	30	31	29	31	29	30	22	23	22	23	22	23	4705900	4375200	4868800	2954300	2510700	2669400	1.279	1.189	1.323	0.803	0.682	0.725	cytoplasm			GO:0016741 transferase activity, transferring one-carbon groups; GO:0008168 methyltransferase activity; GO:0003824 catalytic activity; GO:0016740 transferase activity;				IPR029063;	S-adenosyl-L-methionine-dependent methyltransferase;
RchiOBHm_Chr4g0441371	Putative mitogen-activated protein kinase CMGC-MAPK family	0.66	Down	0.0052762	---	30.3	65.559	30	12	7	6	6	4	5	6	3	11	11	11	11	12	10	7	6	7	6	7	7	219330	234310	205850	160690	146560	128120	1.202	1.284	1.128	0.881	0.803	0.702	chloroplast	GO:0016310 phosphorylation; GO:0044267 cellular protein metabolic process; GO:0044238 primary metabolic process; GO:0044237 cellular metabolic process; GO:0006796 phosphate-containing compound metabolic process; GO:0071704 organic substance metabolic process; GO:0008152 metabolic process; GO:0006468 protein phosphorylation; GO:0006793 phosphorus metabolic process; GO:0044260 cellular macromolecul…		GO:0005524 ATP binding; GO:1901265 nucleoside phosphate binding; GO:0016773 phosphotransferase activity, alcohol group as acceptor; GO:0001882 nucleoside binding; GO:0043167 ion binding; GO:0004672 protein kinase activity; GO:0000166 nucleotide binding; GO:0004702 signal transducer, downstream of receptor, with serine/threonine kinase activity; GO:0004871 signal transducer activity; GO:0004707 MA…				IPR000719; IPR011009;	Protein kinase domain; Protein kinase-like domain;
RchiOBHm_Chr4g0442091	Putative alpha-ketoglutarate-dependent dioxygenase AlkB	0.483	Down	0.00067595	---	24.6	70.505	39	11	11	7	9	11	4	5	3	9	11	10	7	8	6	9	11	10	7	8	6	505810	511090	589040	277470	268880	230040	1.274	1.287	1.484	0.699	0.677	0.579	nucleus							IPR027450;	Alpha-ketoglutarate-dependent dioxygenase AlkB-like;
RchiOBHm_Chr4g0442811	"Putative dynamin central domain, dynamin, GTPase domain, GTPase effector domain, Dynamin superfamily"	0.656	Down	0.0046034	---	51.4	69.934	98	23	21	17	19	17	16	16	13	23	22	21	21	22	20	21	20	19	19	20	19	2154800	2105500	2402700	1640300	1345300	1382600	1.172	1.145	1.307	0.892	0.732	0.752	cytoplasm			GO:1901265 nucleoside phosphate binding; GO:0001882 nucleoside binding; GO:0043167 ion binding; GO:0016817 hydrolase activity, acting on acid anhydrides; GO:0016787 hydrolase activity; GO:0000166 nucleotide binding; GO:0017111 nucleoside-triphosphatase activity; GO:0097159 organic cyclic compound binding; GO:1901363 heterocyclic compound binding; GO:0032549 ribonucleoside binding; GO:0097367 carb…				IPR030381; IPR003130; IPR001401; IPR020850; IPR027417; IPR000375;	Dynamin-type guanine nucleotide-binding (G) domain; Dynamin GTPase effector; Dynamin, GTPase domain; GTPase effector domain; P-loop containing nucleoside triphosphate hydrolase; Dynamin central domain;
RchiOBHm_Chr4g0443021	Putative microtubule-associated protein	0.562	Down	0.0178951	---	17.6	69.399	14	9	9	4	3	3	2	1	1	7	7	5	5	6	5	7	7	5	5	6	5	180560	236530	156630	123550	106360	92664	1.209	1.583	1.049	0.827	0.712	0.62	cytoplasm	GO:0016043 cellular component organization; GO:0007010 cytoskeleton organization; GO:0009987 cellular process; GO:0006996 organelle organization; GO:0071840 cellular component organization or biogenesis;		GO:0015631 tubulin binding; GO:0005515 protein binding; GO:0008092 cytoskeletal protein binding; GO:0008017 microtubule binding; GO:0005488 binding;
RchiOBHm_Chr4g0443501	Putative pectinesterase	4.525	Up	0.00028306	---	22.6	59.233	36	10	10	1	3	2	12	8	10	7	5	8	10	9	10	7	5	8	10	9	10	345550	470980	509120	1854000	1957000	2184100	0.283	0.386	0.417	1.52	1.604	1.79	chloroplast	GO:0071554 cell wall organization or biogenesis; GO:0016043 cellular component organization; GO:0071555 cell wall organization; GO:0045229 external encapsulating structure organization; GO:0009987 cellular process; GO:0071840 cellular component organization or biogenesis; GO:0042545 cell wall modification;	GO:0005618 cell wall; GO:0030312 external encapsulating structure; GO:0005623 cell; GO:0044464 cell part; GO:0071944 cell periphery;	GO:0016787 hydrolase activity; GO:0052689 carboxylic ester hydrolase activity; GO:0004857 enzyme inhibitor activity; GO:0098772 molecular function regulator; GO:0030234 enzyme regulator activity; GO:0003824 catalytic activity; GO:0030599 pectinesterase activity; GO:0016788 hydrolase activity, acting on ester bonds;	K01051	E3.1.1.11; pectinesterase [EC:3.1.1.11]	mdm00040 Pentose and glucuronate interconversions - Malus domestica (apple); mdm01100 Metabolic pathways - Malus domestica (apple);	IPR011050; IPR000070; IPR006501; IPR012334;	Pectin lyase fold/virulence factor; Pectinesterase, catalytic; Pectinesterase inhibitor domain; Pectin lyase fold;
RchiOBHm_Chr4g0443891	Putative transcription factor WD40-like family	0.333	Down	0.0029584	---	25.3	64.81	19	9	9	7	5	5	1	1	0	7	6	6	5	5	6	7	6	6	5	5	6	267180	212190	217100	72972	100380	58516	1.727	1.371	1.403	0.472	0.649	0.378	nucleus			GO:0005515 protein binding; GO:0005488 binding;	K12816	CDC40, PRP17; pre-mRNA-processing factor 17	mdm03040 Spliceosome - Malus domestica (apple);	IPR017986; IPR015943;	WD40-repeat-containing domain; WD40/YVTN repeat-like-containing domain;
RchiOBHm_Chr4g0444321	"Putative START-like domain, Bet v I type allergen"	0.629	Down	0.00119525	---	73.7	17.33	91	15	15	14	23	18	13	12	11	14	14	15	13	14	14	14	14	15	13	14	14	13150000	13849000	12581000	9130700	7891000	7867800	1.224	1.289	1.171	0.85	0.734	0.732	cytoplasm	GO:0006952 defense response; GO:0050896 response to stimulus; GO:0006950 response to stress; GO:0009607 response to biotic stimulus;						IPR023393; IPR000916;	START-like domain; Bet v I/Major latex protein;
RchiOBHm_Chr4g0444051	Putative oxidoreductase	32.708	Up	0.000124509	---	56.2	63.72	69	22	22	4	3	2	15	23	22	10	6	10	20	21	20	10	6	10	20	21	20	188220	101610	87562	3666600	4400500	4272000	0.089	0.048	0.041	1.73	2.076	2.016	chloroplast	GO:0044699 single-organism process; GO:0008152 metabolic process; GO:0055114 oxidation-reduction process; GO:0044710 single-organism metabolic process;		GO:0016702 oxidoreductase activity, acting on single donors with incorporation of molecular oxygen, incorporation of two atoms of oxygen; GO:0016701 oxidoreductase activity, acting on single donors with incorporation of molecular oxygen; GO:0003824 catalytic activity; GO:0051213 dioxygenase activity; GO:0016491 oxidoreductase activity;	K09840	NCED; 9-cis-epoxycarotenoid dioxygenase [EC:1.13.11.51]	mdm00906 Carotenoid biosynthesis - Malus domestica (apple); mdm01100 Metabolic pathways - Malus domestica (apple); mdm01110 Biosynthesis of secondary metabolites - Malus domestica (apple);
RchiOBHm_Chr4g0444591	Putative N-hydroxythioamide S-beta-glucosyltransferase	2.037	Up	0.042979	---	9.5	51.252	11	3	3	2	2	1	2	3	1	2	2	1	2	3	2	2	2	1	2	3	2	34029	52291	0	73454	83673	106670	0.486	0.747		1.049	1.195	1.523	chloroplast	GO:0008152 metabolic process;		GO:0016757 transferase activity, transferring glycosyl groups; GO:0016758 transferase activity, transferring hexosyl groups; GO:0003824 catalytic activity; GO:0016740 transferase activity;	K11820	UGT74B1; N-hydroxythioamide S-beta-glucosyltransferase [EC:2.4.1.195]	mdm00380 Tryptophan metabolism - Malus domestica (apple); mdm00966 Glucosinolate biosynthesis - Malus domestica (apple); mdm01100 Metabolic pathways - Malus domestica (apple); mdm01110 Biosynthesis of secondary metabolites - Malus domestica (apple); mdm01210 2-Oxocarboxylic acid metabolism - Malus domestica (apple);
RchiOBHm_Chr4g0444701	Putative peptidase M20	0.262	Down	8.2594e-05	---	43.8	48.14	83	13	13	17	18	19	11	9	9	13	13	13	10	11	9	13	13	13	10	11	9	1437000	1540700	1810500	446470	381170	425860	1.427	1.53	1.798	0.443	0.379	0.423	chloroplast	GO:0008152 metabolic process;		GO:0016787 hydrolase activity; GO:0003824 catalytic activity;	K14664	ILR1; IAA-amino acid hydrolase [EC:3.5.1.-]		IPR011650;	Peptidase M20, dimerisation domain;
RchiOBHm_Chr5g0001711	PREDICTED: uncharacterized membrane protein At1g16860 [Fragaria vesca subsp. vesca]	2.044	Up	0.022876	---	7.8	45.474	8	2	2	2	0	0	2	2	2	2	2	2	2	2	2	2	2	2	2	2	2	32353	50345	28425	60539	79852	86722	0.574	0.893	0.504	1.074	1.417	1.538	chloroplast
RchiOBHm_Chr4g0445281	glycine-rich family protein [Populus trichocarpa]	0.581	Down	0.0041819	---	36.2	46.824	34	10	10	8	5	6	3	6	6	8	9	9	7	8	8	8	9	9	7	8	8	556470	506040	432470	275030	322050	270820	1.413	1.285	1.098	0.698	0.818	0.688	nucleus
RchiOBHm_Chr4g0445481	"Putative nonaspanin (TM9SF), major facilitator superfamily domain-containing protein"	0.647	Down	0.00041514	---	18.3	67.792	33	8	6	6	5	4	6	6	6	7	8	7	8	8	8	6	6	5	6	6	6	802790	773700	863450	541700	535290	501880	1.199	1.155	1.289	0.809	0.799	0.749	plasma membrane		GO:0031224 intrinsic component of membrane; GO:0016020 membrane; GO:0016021 integral component of membrane; GO:0044425 membrane part;					IPR020846;	Major facilitator superfamily domain;
RchiOBHm_Chr5g0002761	Putative adenylyl-sulfate reductase (thioredoxin)	1.911	Up	0.00109797	---	23.9	50.585	15	6	6	2	2	1	4	2	4	5	6	4	5	4	6	5	6	4	5	4	6	133960	132230	120710	275750	217000	246640	0.714	0.704	0.643	1.469	1.156	1.314	chloroplast	GO:0050794 regulation of cellular process; GO:0006790 sulfur compound metabolic process; GO:0065008 regulation of biological quality; GO:0055114 oxidation-reduction process; GO:0045454 cell redox homeostasis; GO:0044763 single-organism cellular process; GO:0019725 cellular homeostasis; GO:0044699 single-organism process; GO:0044237 cellular metabolic process; GO:0019419 sulfate reduction; GO:0042…		GO:0016667 oxidoreductase activity, acting on a sulfur group of donors; GO:0016671 oxidoreductase activity, acting on a sulfur group of donors, disulfide as acceptor; GO:0003824 catalytic activity; GO:0016491 oxidoreductase activity;	K05907	APR; adenylyl-sulfate reductase (glutathione) [EC:1.8.4.9]	mdm00920 Sulfur metabolism - Malus domestica (apple); mdm01100 Metabolic pathways - Malus domestica (apple);	IPR014729; IPR002500; IPR012336; IPR013766;	Rossmann-like alpha/beta/alpha sandwich fold; Phosphoadenosine phosphosulphate reductase; Thioredoxin-like fold; Thioredoxin domain;
RchiOBHm_Chr4g0446441	Putative delta(24)-sterol reductase	0.659	Down	0.021878	---	53	66.517	140	25	25	29	23	24	23	24	17	22	20	22	22	23	21	22	20	22	22	23	21	2888700	2343200	2702900	1734700	1765400	1727100	1.317	1.068	1.232	0.791	0.805	0.787	cytoplasm	GO:0044699 single-organism process; GO:0008152 metabolic process; GO:0055114 oxidation-reduction process; GO:0044710 single-organism metabolic process;		GO:0097159 organic cyclic compound binding; GO:1901363 heterocyclic compound binding; GO:0016614 oxidoreductase activity, acting on CH-OH group of donors; GO:1901265 nucleoside phosphate binding; GO:0050660 flavin adenine dinucleotide binding; GO:0003824 catalytic activity; GO:0005488 binding; GO:0043167 ion binding; GO:0043168 anion binding; GO:0000166 nucleotide binding; GO:0048037 cofactor bin…	K09828	DHCR24, DWF1; Delta24-sterol reductase [EC:1.3.1.72 1.3.1.-]	mdm00100 Steroid biosynthesis - Malus domestica (apple); mdm01100 Metabolic pathways - Malus domestica (apple); mdm01110 Biosynthesis of secondary metabolites - Malus domestica (apple);	IPR016166; IPR016169; IPR006094;	FAD-binding, type 2; CO dehydrogenase flavoprotein-like, FAD-binding, subdomain 2; FAD linked oxidase, N-terminal;
RchiOBHm_Chr5g0003181	Putative peroxidase	3.188	Up	0.00133667	---	34	37.426	24	8	8	3	2	1	5	7	6	7	5	6	8	8	7	7	5	6	8	8	7	76955	82285	51797	217940	238610	216370	0.522	0.559	0.352	1.479	1.62	1.469	vacuolar membrane	GO:0008152 metabolic process; GO:0042743 hydrogen peroxide metabolic process; GO:0006950 response to stress; GO:0072593 reactive oxygen species metabolic process; GO:0055114 oxidation-reduction process; GO:0044710 single-organism metabolic process; GO:0006979 response to oxidative stress; GO:0044699 single-organism process; GO:0044248 cellular catabolic process; GO:0050896 response to stimulus; G…		GO:0097159 organic cyclic compound binding; GO:1901363 heterocyclic compound binding; GO:0020037 heme binding; GO:0003824 catalytic activity; GO:0005488 binding; GO:0016209 antioxidant activity; GO:0004601 peroxidase activity; GO:0046906 tetrapyrrole binding; GO:0016491 oxidoreductase activity; GO:0016684 oxidoreductase activity, acting on peroxide as acceptor;	K00430	E1.11.1.7; peroxidase [EC:1.11.1.7]	mdm00940 Phenylpropanoid biosynthesis - Malus domestica (apple); mdm01100 Metabolic pathways - Malus domestica (apple); mdm01110 Biosynthesis of secondary metabolites - Malus domestica (apple);	IPR033905; IPR002016;	Secretory peroxidase; Haem peroxidase, plant/fungal/bacterial;
RchiOBHm_Chr4g0446451	"Putative anamorsin, S-adenosyl-L-methionine-dependent methyltransferase"	0.638	Down	0.0077767	---	25	27.805	17	4	2	4	4	3	1	2	3	4	4	3	4	4	3	2	2	1	2	2	1	240800	273760	240000	186890	143250	151060	1.169	1.329	1.165	0.907	0.696	0.733	nucleus	GO:0006790 sulfur compound metabolic process; GO:0044085 cellular component biogenesis; GO:0051188 cofactor biosynthetic process; GO:0016043 cellular component organization; GO:0008152 metabolic process; GO:0031163 metallo-sulfur cluster assembly; GO:0022607 cellular component assembly; GO:0016226 iron-sulfur cluster assembly; GO:0009058 biosynthetic process; GO:0009987 cellular process; GO:00442…	GO:0044424 intracellular part; GO:0005623 cell; GO:0044464 cell part; GO:0005622 intracellular; GO:0005737 cytoplasm;	GO:0051536 iron-sulfur cluster binding; GO:0005488 binding; GO:0051540 metal cluster binding;	K22746			IPR029063;	S-adenosyl-L-methionine-dependent methyltransferase;
RchiOBHm_Chr5g0004231	Putative protein kinase RLK-Pelle-DLSV family	2.857	Up	4.3431e-05	---	10.4	73.107	11	5	5	2	1	0	2	3	3	4	4	3	3	4	4	4	4	3	3	4	4	77489	68464	65077	201680	208120	193180	0.571	0.505	0.48	1.487	1.534	1.424	chloroplast	GO:0016310 phosphorylation; GO:0044267 cellular protein metabolic process; GO:0044238 primary metabolic process; GO:0044237 cellular metabolic process; GO:0006796 phosphate-containing compound metabolic process; GO:0071704 organic substance metabolic process; GO:0008152 metabolic process; GO:0006468 protein phosphorylation; GO:0006793 phosphorus metabolic process; GO:0044260 cellular macromolecul…		GO:0005524 ATP binding; GO:1901265 nucleoside phosphate binding; GO:0016773 phosphotransferase activity, alcohol group as acceptor; GO:0001882 nucleoside binding; GO:0043167 ion binding; GO:0004672 protein kinase activity; GO:0000166 nucleotide binding; GO:0097159 organic cyclic compound binding; GO:1901363 heterocyclic compound binding; GO:0032549 ribonucleoside binding; GO:0097367 carbohydrate …				IPR000719; IPR002902; IPR001245; IPR013320; IPR011009;	Protein kinase domain; Gnk2-homologous domain; Serine-threonine/tyrosine-protein kinase catalytic domain; Concanavalin A-like lectin/glucanase domain; Protein kinase-like domain;
RchiOBHm_Chr5g0008121	Putative transcription factor TFIIH subunit p52/Tfb2	2.91	Up	0.0129956	---	9.1	52.078	10	3	3	1	0	1	3	2	3	2	2	1	3	2	3	2	2	1	3	2	3	31061	21287	0	85033	60104	83206	0.553	0.379		1.515	1.071	1.482	nucleus	GO:0033554 cellular response to stress; GO:0051716 cellular response to stimulus; GO:0006725 cellular aromatic compound metabolic process; GO:0006950 response to stress; GO:0006259 DNA metabolic process; GO:0006289 nucleotide-excision repair; GO:1901360 organic cyclic compound metabolic process; GO:0006807 nitrogen compound metabolic process; GO:0044238 primary metabolic process; GO:0050896 respo…	GO:0043226 organelle; GO:0043231 intracellular membrane-bounded organelle; GO:0043229 intracellular organelle; GO:0005634 nucleus; GO:0044464 cell part; GO:0005622 intracellular; GO:0044446 intracellular organelle part; GO:0000439 core TFIIH complex; GO:0032991 macromolecular complex; GO:0044424 intracellular part; GO:0043234 protein complex; GO:0043227 membrane-bounded organelle; GO:0005623 cell…	GO:0070035 purine NTP-dependent helicase activity; GO:0016462 pyrophosphatase activity; GO:0003824 catalytic activity; GO:0004386 helicase activity; GO:0004003 ATP-dependent DNA helicase activity; GO:0042623 ATPase activity, coupled; GO:0008026 ATP-dependent helicase activity; GO:0016817 hydrolase activity, acting on acid anhydrides; GO:0016787 hydrolase activity; GO:0017111 nucleoside-triphospha…	K03144	TFIIH4, GTF2H4, TFB2; transcription initiation factor TFIIH subunit 4	mdm03022 Basal transcription factors - Malus domestica (apple); mdm03420 Nucleotide excision repair - Malus domestica (apple);
RchiOBHm_Chr4g0447201	ribosomal RNA small subunit methyltransferase J [Arabidopsis thaliana]	0.481	Down	0.0024792	---	38.8	35.937	30	8	8	6	6	6	4	2	6	8	8	8	8	5	7	8	8	8	8	5	7	622270	570490	512050	274600	229390	316710	1.478	1.355	1.217	0.652	0.545	0.752	chloroplast
RchiOBHm_Chr4g0447211	Putative lipoyl synthase	0.517	Down	0.00099915	---	23	37.233	19	4	4	4	5	5	2	2	1	4	4	4	4	3	2	4	4	4	4	3	2	102580	121850	114460	51836	61229	62046	1.197	1.422	1.336	0.605	0.715	0.724	chloroplast	GO:0051188 cofactor biosynthetic process; GO:0016053 organic acid biosynthetic process; GO:0044699 single-organism process; GO:0009058 biosynthetic process; GO:0044255 cellular lipid metabolic process; GO:0044237 cellular metabolic process; GO:0044272 sulfur compound biosynthetic process; GO:0008610 lipid biosynthetic process; GO:0071704 organic substance metabolic process; GO:0008152 metabolic p…	GO:0043226 organelle; GO:0043231 intracellular membrane-bounded organelle; GO:0043229 intracellular organelle; GO:0044464 cell part; GO:0005622 intracellular; GO:0005737 cytoplasm; GO:0044424 intracellular part; GO:0043227 membrane-bounded organelle; GO:0005623 cell; GO:0009536 plastid; GO:0044444 cytoplasmic part; GO:0009507 chloroplast;	GO:0016879 ligase activity, forming carbon-nitrogen bonds; GO:0016979 lipoate-protein ligase activity; GO:0070283 radical SAM enzyme activity; GO:0003824 catalytic activity; GO:0005488 binding; GO:0051536 iron-sulfur cluster binding; GO:0016992 lipoate synthase activity; GO:0016874 ligase activity; GO:0016782 transferase activity, transferring sulfur-containing groups; GO:0016783 sulfurtransferas…	K03644	lipA; lipoyl synthase [EC:2.8.1.8]	mdm00785 Lipoic acid metabolism - Malus domestica (apple); mdm01100 Metabolic pathways - Malus domestica (apple);	IPR013785; IPR031691; IPR006638; IPR007197;	Aldolase-type TIM barrel; Lipoyl synthase, N-terminal; Elongator protein 3/MiaB/NifB; Radical SAM;
RchiOBHm_Chr5g0008511	Putative linoleate 13S-lipoxygenase	2.308	Up	0.0042418	---	49.7	107.5	124	30	28	18	14	15	30	22	25	27	26	24	27	25	28	25	24	23	26	24	26	969880	706910	700940	1978600	1498400	2008500	0.74	0.539	0.535	1.51	1.143	1.533	cytoplasm	GO:0044699 single-organism process; GO:0008152 metabolic process; GO:0055114 oxidation-reduction process; GO:0044710 single-organism metabolic process;		GO:0016702 oxidoreductase activity, acting on single donors with incorporation of molecular oxygen, incorporation of two atoms of oxygen; GO:0016701 oxidoreductase activity, acting on single donors with incorporation of molecular oxygen; GO:0003824 catalytic activity; GO:0005488 binding; GO:0051213 dioxygenase activity; GO:0043167 ion binding; GO:0043169 cation binding; GO:0046872 metal ion bindi…	K00454	LOX2S; lipoxygenase [EC:1.13.11.12]	mdm00591 Linoleic acid metabolism - Malus domestica (apple); mdm00592 alpha-Linolenic acid metabolism - Malus domestica (apple); mdm01100 Metabolic pathways - Malus domestica (apple); mdm01110 Biosynthesis of secondary metabolites - Malus domestica (apple);	IPR027433; IPR001024; IPR013819;	Lipoxygenase, domain 3; PLAT/LH2 domain; Lipoxygenase, C-terminal;
RchiOBHm_Chr5g0010331	"Putative PMR5 domain, PC-Esterase, protein trichome birefringence-like 37/38"	1.655	Up	0.0090773	---	29.7	42.036	22	7	7	3	4	3	4	5	3	6	6	5	6	6	6	6	6	5	6	6	6	176530	190810	142290	266900	316650	260200	0.783	0.846	0.631	1.183	1.404	1.154	chloroplast							IPR025846;	PMR5 N-terminal domain;
RchiOBHm_Chr5g0010931	Putative actinidain	5.06	Up	0.000104439	---	4.1	57.177	13	2	2	2	0	2	3	3	3	2	2	2	2	2	2	2	2	2	2	2	2	103140	80327	78241	419410	496300	408810	0.39	0.304	0.296	1.586	1.877	1.546	nucleus	GO:0006508 proteolysis; GO:0008152 metabolic process; GO:0043170 macromolecule metabolic process; GO:0019538 protein metabolic process; GO:0044238 primary metabolic process; GO:0071704 organic substance metabolic process;		GO:0070011 peptidase activity, acting on L-amino acid peptides; GO:0008234 cysteine-type peptidase activity; GO:0016787 hydrolase activity; GO:0008233 peptidase activity; GO:0003824 catalytic activity;				IPR013201; IPR000118; IPR000668;	Cathepsin propeptide inhibitor domain (I29); Granulin; Peptidase C1A, papain C-terminal;
RchiOBHm_Chr5g0001511	Putative ubiquitinyl hydrolase 1	0.443	Down	0.0089584	---	20.3	40.535	11	6	6	6	2	2	0	1	0	6	6	5	6	5	4	6	6	5	6	5	4	146300	97065	94217	41720	57056	50740	1.802	1.196	1.161	0.514	0.703	0.625	cytoplasm	GO:0070646 protein modification by small protein removal; GO:0044267 cellular protein metabolic process; GO:0070647 protein modification by small protein conjugation or removal; GO:0016579 protein deubiquitination; GO:0044238 primary metabolic process; GO:0044237 cellular metabolic process; GO:0071704 organic substance metabolic process; GO:0008152 metabolic process; GO:0044260 cellular macromole…		GO:0008233 peptidase activity; GO:0036459 thiol-dependent ubiquitinyl hydrolase activity; GO:0003824 catalytic activity; GO:0101005 ubiquitinyl hydrolase activity; GO:0070011 peptidase activity, acting on L-amino acid peptides; GO:0019783 ubiquitin-like protein-specific protease activity; GO:0008234 cysteine-type peptidase activity; GO:0016787 hydrolase activity;	K12847	USP39, SAD1; U4/U6.U5 tri-snRNP-associated protein 2	mdm03040 Spliceosome - Malus domestica (apple);	IPR028889; IPR001394;	Ubiquitin specific protease domain; Peptidase C19, ubiquitin carboxyl-terminal hydrolase;
RchiOBHm_Chr5g0001831	1-aminocyclopropane-1-carboxylate oxidase 2	0.598	Down	0.026399	---	23.1	35.699	17	6	6	4	3	3	1	3	3	5	5	5	4	6	5	5	5	5	4	6	5	528730	576320	646490	315750	280200	451340	1.133	1.235	1.386	0.677	0.601	0.968	cytoplasm	GO:0044699 single-organism process; GO:0008152 metabolic process; GO:0055114 oxidation-reduction process; GO:0044710 single-organism metabolic process;		GO:0003824 catalytic activity; GO:0016491 oxidoreductase activity;	K05933	E1.14.17.4; aminocyclopropanecarboxylate oxidase [EC:1.14.17.4]	mdm00270 Cysteine and methionine metabolism - Malus domestica (apple); mdm01100 Metabolic pathways - Malus domestica (apple); mdm01110 Biosynthesis of secondary metabolites - Malus domestica (apple);	IPR027443; IPR005123; IPR026992;	Isopenicillin N synthase-like; Oxoglutarate/iron-dependent dioxygenase; Non-haem dioxygenase N-terminal domain;
RchiOBHm_Chr5g0002361	"Putative calcium-dependent channel, 7TM region phosphate"	0.653	Down	9.5053e-05	---	16.3	88.662	29	10	10	7	6	5	4	4	3	10	8	9	8	8	7	10	8	9	8	8	7	209870	225370	224220	147490	141750	141450	1.155	1.24	1.234	0.812	0.78	0.779	plasma membrane		GO:0016020 membrane;		K21989	TMEM63; calcium permeable stress-gated cation channel		IPR027815; IPR003864; IPR032880;	10TM putative phosphate transporter, cytosolic domain; Calcium-dependent channel, 7TM region, putative phosphate; Calcium permeable stress-gated cation channel 1, N-terminal transmembrane domain;
RchiOBHm_Chr5g0003981	Putative DnaJ domain-containing protein	0.44	Down	0.032418	---	16	35.244	10	3	3	2	3	3	0	1	1	2	3	3	2	2	3	2	3	3	2	2	3	44940	64172	30277	21524	23614	16174	1.343	1.918	0.905	0.643	0.706	0.484	vacuolar membrane				K19371	DNAJC25; DnaJ homolog subfamily C member 25		IPR001623;	DnaJ domain;
RchiOBHm_Chr5g0014281	PREDICTED: outer envelope membrane protein 7 [Vitis vinifera]	2.114	Up	0.00041868	---	46.5	8.965	14	2	2	2	2	2	2	3	3	2	2	2	2	2	2	2	2	2	2	2	2	96844	109130	93990	190970	215460	227880	0.622	0.701	0.604	1.226	1.384	1.463	extracellular
RchiOBHm_Chr5g0014331	Putative 9-cis-epoxycarotenoid dioxygenase	3.762	Up	0.002503	---	16.4	75.953	17	7	6	2	1	1	4	4	5	2	3	4	5	6	6	1	3	3	4	5	5	56343	34297	48868	213540	136090	175640	0.509	0.31	0.441	1.927	1.228	1.585	chloroplast	GO:0044699 single-organism process; GO:0008152 metabolic process; GO:0055114 oxidation-reduction process; GO:0044710 single-organism metabolic process;		GO:0016702 oxidoreductase activity, acting on single donors with incorporation of molecular oxygen, incorporation of two atoms of oxygen; GO:0016701 oxidoreductase activity, acting on single donors with incorporation of molecular oxygen; GO:0003824 catalytic activity; GO:0051213 dioxygenase activity; GO:0016491 oxidoreductase activity;	K09840	NCED; 9-cis-epoxycarotenoid dioxygenase [EC:1.13.11.51]	mdm00906 Carotenoid biosynthesis - Malus domestica (apple); mdm01100 Metabolic pathways - Malus domestica (apple); mdm01110 Biosynthesis of secondary metabolites - Malus domestica (apple);
RchiOBHm_Chr5g0006601	Putative tetratricopeptide-like helical domain-containing protein	0.441	Down	0.00070077	---	20.4	106.95	40	13	12	8	9	9	5	6	3	13	12	10	8	12	9	12	12	10	8	11	9	380520	355580	371730	166900	183700	137630	1.43	1.337	1.397	0.627	0.691	0.517	cytoplasm	GO:0006396 RNA processing; GO:0006725 cellular aromatic compound metabolic process; GO:1901360 organic cyclic compound metabolic process; GO:0006807 nitrogen compound metabolic process; GO:0044238 primary metabolic process; GO:0044237 cellular metabolic process; GO:0071704 organic substance metabolic process; GO:0016070 RNA metabolic process; GO:0008152 metabolic process; GO:0090304 nucleic acid …		GO:0005515 protein binding; GO:0005488 binding;	K12867	SYF1, XAB2; pre-mRNA-splicing factor SYF1	mdm03040 Spliceosome - Malus domestica (apple);	IPR011990; IPR013026;	Tetratricopeptide-like helical domain; Tetratricopeptide repeat-containing domain;
RchiOBHm_Chr5g0007621	Putative catechol oxidase	0.556	Down	0.0140383	---	28.4	64.936	52	13	13	9	11	10	9	7	6	11	10	11	11	10	8	11	10	11	11	10	8	1126400	853470	839390	567410	580110	420200	1.541	1.167	1.148	0.776	0.793	0.575	chloroplast	GO:0046148 pigment biosynthetic process; GO:0044699 single-organism process; GO:0008152 metabolic process; GO:0042440 pigment metabolic process; GO:0055114 oxidation-reduction process; GO:0044710 single-organism metabolic process;		GO:0016682 oxidoreductase activity, acting on diphenols and related substances as donors, oxygen as acceptor; GO:0016679 oxidoreductase activity, acting on diphenols and related substances as donors; GO:0003824 catalytic activity; GO:0004097 catechol oxidase activity; GO:0016491 oxidoreductase activity;	K00422	E1.10.3.1; polyphenol oxidase [EC:1.10.3.1]	mdm00350 Tyrosine metabolism - Malus domestica (apple); mdm00950 Isoquinoline alkaloid biosynthesis - Malus domestica (apple); mdm01100 Metabolic pathways - Malus domestica (apple); mdm01110 Biosynthesis of secondary metabolites - Malus domestica (apple);	IPR002227; IPR008922; IPR022739; IPR022740;	Tyrosinase copper-binding domain; Uncharacterised domain, di-copper centre; Polyphenol oxidase, central domain; Polyphenol oxidase, C-terminal;
RchiOBHm_Chr5g0014411	Putative (S)-2-hydroxy-acid oxidase	2.044	Up	0.00023551	---	57.3	40.675	84	17	12	11	10	10	19	18	16	15	15	12	16	15	15	11	12	9	11	12	12	1656500	1434000	1376300	3102600	3019200	3007900	0.731	0.633	0.607	1.369	1.332	1.327	cytoplasm	GO:0044699 single-organism process; GO:0008152 metabolic process; GO:0055114 oxidation-reduction process; GO:0044710 single-organism metabolic process;		GO:0097159 organic cyclic compound binding; GO:1901363 heterocyclic compound binding; GO:0097367 carbohydrate derivative binding; GO:1901265 nucleoside phosphate binding; GO:0003824 catalytic activity; GO:0032553 ribonucleotide binding; GO:0005488 binding; GO:0043167 ion binding; GO:0043168 anion binding; GO:0000166 nucleotide binding; GO:0010181 FMN binding; GO:0048037 cofactor binding; GO:00164…	K11517	HAO; (S)-2-hydroxy-acid oxidase [EC:1.1.3.15]	mdm00630 Glyoxylate and dicarboxylate metabolism - Malus domestica (apple); mdm01100 Metabolic pathways - Malus domestica (apple); mdm01110 Biosynthesis of secondary metabolites - Malus domestica (apple); mdm01200 Carbon metabolism - Malus domestica (apple); mdm04146 Peroxisome - Malus domestica (apple);	IPR013785; IPR000262;	Aldolase-type TIM barrel; FMN-dependent dehydrogenase;
RchiOBHm_Chr5g0008301	Putative DNA-directed RNA polymerase	0.636	Down	0.0069555	---	16.7	135.04	45	14	14	10	9	11	4	7	4	13	12	12	10	12	13	13	12	12	10	12	13	866080	788710	688460	482170	553330	454540	1.356	1.235	1.078	0.755	0.866	0.711	nucleus	GO:0018130 heterocycle biosynthetic process; GO:0006725 cellular aromatic compound metabolic process; GO:0097659 nucleic acid-templated transcription; GO:0034654 nucleobase-containing compound biosynthetic process; GO:1901360 organic cyclic compound metabolic process; GO:0006807 nitrogen compound metabolic process; GO:0032774 RNA biosynthetic process; GO:0009058 biosynthetic process; GO:0044238 p…		GO:0003677 DNA binding; GO:0034062 5'-3' RNA polymerase activity; GO:0097747 RNA polymerase activity; GO:0001882 nucleoside binding; GO:1901363 heterocyclic compound binding; GO:0097159 organic cyclic compound binding; GO:0032549 ribonucleoside binding; GO:0097367 carbohydrate derivative binding; GO:0016779 nucleotidyltransferase activity; GO:0003824 catalytic activity; GO:0005488 binding; GO:000…	K03010	RPB2, POLR2B; DNA-directed RNA polymerase II subunit RPB2 [EC:2.7.7.6]	mdm03020 RNA polymerase - Malus domestica (apple);	IPR007645; IPR007120; IPR014724; IPR007641; IPR007642; IPR007644; IPR007646; IPR007647;	RNA polymerase Rpb2, domain 3; DNA-directed RNA polymerase, subunit 2, domain 6; RNA polymerase Rpb2, OB-fold; RNA polymerase Rpb2, domain 7; RNA polymerase Rpb2, domain 2; RNA polymerase, beta subunit, protrusion; RNA polymerase Rpb2, domain 4; RNA polymerase Rpb2, domain 5;
RchiOBHm_Chr5g0010051	Putative NAD(+) diphosphatase	0.604	Down	0.006623	---	10.7	50.676	14	3	3	3	3	3	1	1	3	3	3	3	3	2	3	3	3	3	3	2	3	49448	64491	58304	38436	31451	34245	1.073	1.4	1.266	0.834	0.683	0.743	mitochondria			GO:0016787 hydrolase activity; GO:0003824 catalytic activity;	K17879	NUDT7; peroxisomal coenzyme A diphosphatase NUDT7 [EC:3.6.1.-]	mdm04146 Peroxisome - Malus domestica (apple);	IPR015797; IPR000086;	NUDIX hydrolase domain-like; NUDIX hydrolase domain;
RchiOBHm_Chr5g0013961	Putative lupus La protein	0.239	Down	0.0138364	---	8.6	40.394	12	3	3	3	4	3	0	1	1	3	3	2	0	2	3	3	3	2	0	2	3	85612	133090	66251	0	24283	21163	1.296	2.014	1.003		0.367	0.32	nucleus	GO:0006396 RNA processing; GO:0006725 cellular aromatic compound metabolic process; GO:1901360 organic cyclic compound metabolic process; GO:0006807 nitrogen compound metabolic process; GO:0044238 primary metabolic process; GO:0044237 cellular metabolic process; GO:0071704 organic substance metabolic process; GO:0016070 RNA metabolic process; GO:0008152 metabolic process; GO:0090304 nucleic acid …	GO:0043226 organelle; GO:0043231 intracellular membrane-bounded organelle; GO:0043229 intracellular organelle; GO:0005634 nucleus; GO:0044464 cell part; GO:0005622 intracellular; GO:0032991 macromolecular complex; GO:0044424 intracellular part; GO:1990904 ribonucleoprotein complex; GO:0030529 intracellular ribonucleoprotein complex; GO:0043227 membrane-bounded organelle; GO:0005623 cell;	GO:0097159 organic cyclic compound binding; GO:1901363 heterocyclic compound binding; GO:0003723 RNA binding; GO:1901265 nucleoside phosphate binding; GO:0005488 binding; GO:0003676 nucleic acid binding; GO:0000166 nucleotide binding; GO:0036094 small molecule binding;	K15191	LARP7; La-related protein 7		IPR006630; IPR011991; IPR000504; IPR012677;	RNA-binding protein Lupus La; Winged helix-turn-helix DNA-binding domain; RNA recognition motif domain; Nucleotide-binding alpha-beta plait domain;
RchiOBHm_Chr5g0014221	Putative microtubule-severing ATPase	0.628	Down	0.0075428	---	30.6	43.995	49	10	10	9	10	9	7	7	7	8	9	9	8	9	9	8	9	9	8	9	9	330500	329650	327420	207720	191690	220570	1.234	1.23	1.222	0.775	0.715	0.823	cytoplasm			GO:0005524 ATP binding; GO:1901265 nucleoside phosphate binding; GO:0001882 nucleoside binding; GO:0043167 ion binding; GO:0000166 nucleotide binding; GO:0097159 organic cyclic compound binding; GO:1901363 heterocyclic compound binding; GO:0032549 ribonucleoside binding; GO:0097367 carbohydrate derivative binding; GO:0032553 ribonucleotide binding; GO:0005488 binding; GO:0032550 purine ribonucleo…	K07767	KATNA1; katanin p60 ATPase-containing subunit A1 [EC:3.6.4.3]		IPR003593; IPR003959; IPR027417;	AAA+ ATPase domain; ATPase, AAA-type, core; P-loop containing nucleoside triphosphate hydrolase;
RchiOBHm_Chr5g0014761	Putative protein kinase CAMK-CAMKL-CHK1 family	0.636	Down	0.0127436	---	14.4	52.914	18	5	4	4	2	5	1	3	3	5	3	5	3	4	4	4	2	4	2	3	3	110700	80891	97386	61565	66392	55669	1.405	1.027	1.236	0.782	0.843	0.707	mitochondria	GO:0050794 regulation of cellular process; GO:0044700 single organism signaling; GO:0016310 phosphorylation; GO:0051716 cellular response to stimulus; GO:0044267 cellular protein metabolic process; GO:0044699 single-organism process; GO:0044238 primary metabolic process; GO:0023052 signaling; GO:0050896 response to stimulus; GO:0044237 cellular metabolic process; GO:0006796 phosphate-containing c…		GO:0005524 ATP binding; GO:1901265 nucleoside phosphate binding; GO:0016773 phosphotransferase activity, alcohol group as acceptor; GO:0001882 nucleoside binding; GO:0043167 ion binding; GO:0004672 protein kinase activity; GO:0000166 nucleotide binding; GO:0097159 organic cyclic compound binding; GO:1901363 heterocyclic compound binding; GO:0032549 ribonucleoside binding; GO:0097367 carbohydrate …				IPR004041; IPR000719; IPR018451; IPR011009;	NAF domain; Protein kinase domain; NAF/FISL domain; Protein kinase-like domain;
RchiOBHm_Chr5g0017701	Putative tetrahydroberberine oxidase	2.899	Up	0.0129649	---	27.8	35.609	9	7	3	1	0	0	2	3	3	5	6	5	6	6	6	2	2	2	3	3	3	121410	142590	126630	246410	547900	338370	0.478	0.562	0.499	0.971	2.158	1.333	nucleus	GO:0044699 single-organism process; GO:0008152 metabolic process; GO:0055114 oxidation-reduction process; GO:0044710 single-organism metabolic process;		GO:0097159 organic cyclic compound binding; GO:1901363 heterocyclic compound binding; GO:0016614 oxidoreductase activity, acting on CH-OH group of donors; GO:1901265 nucleoside phosphate binding; GO:0050660 flavin adenine dinucleotide binding; GO:0003824 catalytic activity; GO:0005488 binding; GO:0043167 ion binding; GO:0043168 anion binding; GO:0000166 nucleotide binding; GO:0048037 cofactor bin…				IPR016166; IPR012951;	FAD-binding, type 2; Berberine/berberine-like;
RchiOBHm_Chr5g0017721	Putative tetrahydroberberine oxidase	1.955	Up	0.031779	---	16	61.542	17	6	5	2	1	2	4	4	4	4	6	5	6	6	6	3	5	4	5	5	5	91864	61839	44582	112920	140840	133720	0.941	0.633	0.457	1.157	1.443	1.37	chloroplast	GO:0044699 single-organism process; GO:0008152 metabolic process; GO:0055114 oxidation-reduction process; GO:0044710 single-organism metabolic process;		GO:0097159 organic cyclic compound binding; GO:1901363 heterocyclic compound binding; GO:0016614 oxidoreductase activity, acting on CH-OH group of donors; GO:1901265 nucleoside phosphate binding; GO:0050660 flavin adenine dinucleotide binding; GO:0003824 catalytic activity; GO:0005488 binding; GO:0043167 ion binding; GO:0043168 anion binding; GO:0000166 nucleotide binding; GO:0048037 cofactor bin…				IPR016166; IPR016169; IPR012951; IPR006094; IPR016167;	FAD-binding, type 2; CO dehydrogenase flavoprotein-like, FAD-binding, subdomain 2; Berberine/berberine-like; FAD linked oxidase, N-terminal; FAD-binding, type 2, subdomain 1;
RchiOBHm_Chr5g0019871	Putative RNA 3'-terminal-phosphate cyclase (ATP)	3.222	Up	0.0084384	---	14.9	40.917	9	3	3	1	1	1	2	2	2	3	3	2	3	3	3	3	3	2	3	3	3	9500.7	15431	17799	41792	60069	35814	0.316	0.513	0.592	1.39	1.998	1.191	mitochondria	GO:0044085 cellular component biogenesis; GO:0042254 ribosome biogenesis; GO:0022613 ribonucleoprotein complex biogenesis; GO:0071840 cellular component organization or biogenesis;	GO:0043229 intracellular organelle; GO:0043232 intracellular non-membrane-bounded organelle; GO:0044446 intracellular organelle part; GO:0031981 nuclear lumen; GO:0044424 intracellular part; GO:0005730 nucleolus; GO:0005623 cell; GO:0044422 organelle part; GO:0043228 non-membrane-bounded organelle; GO:0043226 organelle; GO:0043231 intracellular membrane-bounded organelle; GO:0031974 membrane-encl…	GO:0003824 catalytic activity;	K11108	RCL1; RNA 3'-terminal phosphate cyclase-like protein	mdm03008 Ribosome biogenesis in eukaryotes - Malus domestica (apple);	IPR013791; IPR023797; IPR013792;	RNA 3'-terminal phosphate cyclase, insert domain; RNA 3'-terminal phosphate cyclase domain; RNA 3'-terminal phosphate cyclase/enolpyruvate transferase, alpha/beta;
RchiOBHm_Chr5g0014771	"Putative Zinc finger, C3HC"	0.627	Down	0.0187994	---	11.5	101.78	20	6	5	5	5	4	1	2	3	5	5	5	2	4	4	4	4	4	1	3	3	138920	161810	111410	77513	91391	89400	1.243	1.448	0.997	0.694	0.818	0.8	nucleus		GO:0043226 organelle; GO:0043231 intracellular membrane-bounded organelle; GO:0043229 intracellular organelle; GO:0005634 nucleus; GO:0044464 cell part; GO:0005622 intracellular; GO:0044424 intracellular part; GO:0043227 membrane-bounded organelle; GO:0005623 cell;	GO:0043169 cation binding; GO:0046872 metal ion binding; GO:0008270 zinc ion binding; GO:0046914 transition metal ion binding; GO:0005488 binding; GO:0043167 ion binding;				IPR012935;	Zinc finger, C3HC-like;
RchiOBHm_Chr5g0027571	Putative (S)-2-hydroxy-acid oxidase	4.401	Up	0.0003446	---	57.1	40.406	45	13	12	6	3	5	11	10	10	11	11	10	13	12	13	10	10	9	12	11	12	227460	196130	198650	861870	1128800	747290	0.406	0.35	0.355	1.539	2.016	1.334	cytoplasm	GO:0044699 single-organism process; GO:0008152 metabolic process; GO:0055114 oxidation-reduction process; GO:0044710 single-organism metabolic process;		GO:0097159 organic cyclic compound binding; GO:1901363 heterocyclic compound binding; GO:0097367 carbohydrate derivative binding; GO:1901265 nucleoside phosphate binding; GO:0003824 catalytic activity; GO:0032553 ribonucleotide binding; GO:0005488 binding; GO:0043167 ion binding; GO:0043168 anion binding; GO:0000166 nucleotide binding; GO:0010181 FMN binding; GO:0048037 cofactor binding; GO:00164…	K11517	HAO; (S)-2-hydroxy-acid oxidase [EC:1.1.3.15]	mdm00630 Glyoxylate and dicarboxylate metabolism - Malus domestica (apple); mdm01100 Metabolic pathways - Malus domestica (apple); mdm01110 Biosynthesis of secondary metabolites - Malus domestica (apple); mdm01200 Carbon metabolism - Malus domestica (apple); mdm04146 Peroxisome - Malus domestica (apple);	IPR013785; IPR000262;	Aldolase-type TIM barrel; FMN-dependent dehydrogenase;
RchiOBHm_Chr5g0028041	Putative SOUL heme-binding protein	2.713	Up	0.00041755	---	23.7	24.804	25	3	3	4	3	3	5	4	6	3	3	3	3	3	3	3	3	3	3	3	3	178670	190070	154270	522790	482710	413600	0.552	0.587	0.477	1.615	1.491	1.278	chloroplast							IPR011256;	Regulatory factor, effector binding domain;
RchiOBHm_Chr5g0028381	Putative chlorophyll A-B binding protein	1.764	Up	0.010958	---	44.8	30.83	29	8	8	5	6	4	4	5	5	7	7	5	6	8	6	7	7	5	6	8	6	304500	280590	248440	389360	551150	529940	0.793	0.731	0.647	1.014	1.435	1.38	chloroplast				K08916	LHCB5; light-harvesting complex II chlorophyll a/b binding protein 5	mdm00196 Photosynthesis - antenna proteins - Malus domestica (apple); mdm01100 Metabolic pathways - Malus domestica (apple);	IPR023329;	Chlorophyll a/b binding protein domain;
RchiOBHm_Chr5g0029771	Putative protein kinase RLK-Pelle-DLSV family	1.549	Up	0.0119751	---	2.5	104.11	4	2	2	0	0	0	2	1	1	2	2	1	2	2	2	2	2	1	2	2	2	19640	23481	0	35604	32990	31595	0.685	0.819		1.242	1.151	1.102	chloroplast	GO:0016310 phosphorylation; GO:0044267 cellular protein metabolic process; GO:0044238 primary metabolic process; GO:0044237 cellular metabolic process; GO:0006796 phosphate-containing compound metabolic process; GO:0071704 organic substance metabolic process; GO:0008152 metabolic process; GO:0006468 protein phosphorylation; GO:0006793 phosphorus metabolic process; GO:0044260 cellular macromolecul…		GO:0005524 ATP binding; GO:1901265 nucleoside phosphate binding; GO:0016773 phosphotransferase activity, alcohol group as acceptor; GO:0001882 nucleoside binding; GO:0043167 ion binding; GO:0005515 protein binding; GO:0004672 protein kinase activity; GO:0000166 nucleotide binding; GO:0097159 organic cyclic compound binding; GO:1901363 heterocyclic compound binding; GO:0032549 ribonucleoside bindi…				IPR021720; IPR000719; IPR001245; IPR032675; IPR013320; IPR011009;	Malectin; Protein kinase domain; Serine-threonine/tyrosine-protein kinase catalytic domain; Leucine-rich repeat domain, L domain-like; Concanavalin A-like lectin/glucanase domain; Protein kinase-like domain;
RchiOBHm_Chr5g0029981	Putative protein kinase RLK-Pelle-DLSV family	3.484	Up	0.0051752	---	10.8	110.74	10	6	4	1	0	0	2	3	4	5	3	3	5	6	5	4	2	2	3	4	3	18111	24278	0	60969	86179	74287	0.343	0.46		1.155	1.633	1.408	plasma membrane	GO:0016310 phosphorylation; GO:0044267 cellular protein metabolic process; GO:0044238 primary metabolic process; GO:0044237 cellular metabolic process; GO:0006796 phosphate-containing compound metabolic process; GO:0071704 organic substance metabolic process; GO:0008152 metabolic process; GO:0006468 protein phosphorylation; GO:0006793 phosphorus metabolic process; GO:0044260 cellular macromolecul…		GO:0005524 ATP binding; GO:1901265 nucleoside phosphate binding; GO:0016773 phosphotransferase activity, alcohol group as acceptor; GO:0001882 nucleoside binding; GO:0043167 ion binding; GO:0005515 protein binding; GO:0004672 protein kinase activity; GO:0000166 nucleotide binding; GO:0097159 organic cyclic compound binding; GO:1901363 heterocyclic compound binding; GO:0032549 ribonucleoside bindi…				IPR021720; IPR000719; IPR001245; IPR032675; IPR013320; IPR011009;	Malectin; Protein kinase domain; Serine-threonine/tyrosine-protein kinase catalytic domain; Leucine-rich repeat domain, L domain-like; Concanavalin A-like lectin/glucanase domain; Protein kinase-like domain;
RchiOBHm_Chr5g0016421	"Putative ribosome-binding ATPase YchF/Obg-like ATPase 1, Beta-grasp domain, TGS-like protein"	0.585	Down	0.02256	---	68.5	44.434	139	26	26	28	24	25	21	22	19	25	23	24	24	26	24	25	23	24	24	26	24	3801600	3709500	3695800	2515600	2146100	1890800	1.284	1.253	1.249	0.85	0.725	0.639	cytoskeleton			GO:1901265 nucleoside phosphate binding; GO:0001882 nucleoside binding; GO:0043167 ion binding; GO:0000166 nucleotide binding; GO:0097159 organic cyclic compound binding; GO:1901363 heterocyclic compound binding; GO:0032549 ribonucleoside binding; GO:0097367 carbohydrate derivative binding; GO:0032553 ribonucleotide binding; GO:0005488 binding; GO:0032550 purine ribonucleoside binding; GO:0043168…	K19788	OLA1; obg-like ATPase 1		IPR013029; IPR012676; IPR006073; IPR031167; IPR027417; IPR023192; IPR012675;	Domain of unknown function DUF933; TGS-like; GTP binding domain; OBG-type guanine nucleotide-binding (G) domain; P-loop containing nucleoside triphosphate hydrolase; TGS-like domain; Beta-grasp domain;
RchiOBHm_Chr5g0031031	"Putative bulb-type lectin domain, PAN/Apple domain-containing protein"	2.942	Up	0.0075404	---	31.2	49.065	28	10	10	3	4	2	8	6	5	7	6	3	9	9	10	7	6	3	9	9	10	195840	150560	94102	439490	380990	475440	0.677	0.52	0.325	1.519	1.316	1.643	extracellular							IPR001480; IPR003609;	Bulb-type lectin domain; PAN/Apple domain;
RchiOBHm_Chr5g0031081	Putative bulb-type lectin domain-containing protein	2.46	Up	0.0154383	---	19.7	42.437	16	4	4	3	1	1	3	4	4	4	4	3	4	4	4	4	4	3	4	4	4	60186	47244	40754	118390	120740	125600	0.704	0.553	0.477	1.385	1.412	1.469	extracellular							IPR001480;	Bulb-type lectin domain;
RchiOBHm_Chr5g0016431	Putative protein kinase RLK-Pelle-LRR-III family	0.634	Down	0.0035422	---	2.9	114.87	8	2	2	2	1	2	1	1	1	2	2	2	2	1	2	2	2	2	2	1	2	42339	36794	39238	24506	0	25476	1.257	1.093	1.165	0.728		0.757	plasma membrane	GO:0016310 phosphorylation; GO:0044267 cellular protein metabolic process; GO:0044238 primary metabolic process; GO:0044237 cellular metabolic process; GO:0006796 phosphate-containing compound metabolic process; GO:0071704 organic substance metabolic process; GO:0008152 metabolic process; GO:0006468 protein phosphorylation; GO:0006793 phosphorus metabolic process; GO:0044260 cellular macromolecul…		GO:0005524 ATP binding; GO:1901265 nucleoside phosphate binding; GO:0016773 phosphotransferase activity, alcohol group as acceptor; GO:0001882 nucleoside binding; GO:0043167 ion binding; GO:0005515 protein binding; GO:0004672 protein kinase activity; GO:0000166 nucleotide binding; GO:0097159 organic cyclic compound binding; GO:1901363 heterocyclic compound binding; GO:0032549 ribonucleoside bindi…				IPR000719; IPR013210; IPR001245; IPR032675; IPR011009;	Protein kinase domain; Leucine-rich repeat-containing N-terminal, plant-type; Serine-threonine/tyrosine-protein kinase catalytic domain; Leucine-rich repeat domain, L domain-like; Protein kinase-like domain;
RchiOBHm_Chr5g0018521	Putative cytochrome P450	0.412	Down	0.042318	---	47.7	54.675	9	16	3	1	2	2	1	1	2	14	14	15	16	15	16	3	3	3	3	3	3	151180	172110	292190	111370	90046	52053	1.044	1.188	2.018	0.769	0.622	0.359	endoplasmic reticulum,plasma membrane	GO:0044699 single-organism process; GO:0008152 metabolic process; GO:0055114 oxidation-reduction process; GO:0044710 single-organism metabolic process;		GO:0097159 organic cyclic compound binding; GO:1901363 heterocyclic compound binding; GO:0020037 heme binding; GO:0005506 iron ion binding; GO:0046914 transition metal ion binding; GO:0003824 catalytic activity; GO:0005488 binding; GO:0043167 ion binding; GO:0043169 cation binding; GO:0046872 metal ion binding; GO:0016705 oxidoreductase activity, acting on paired donors, with incorporation or red…	K20667	CYP716A; beta-amyrin 28-monooxygenase [EC:1.14.13.201]
RchiOBHm_Chr5g0032401	Putative aromatic-amino-acid transaminase	1.514	Up	0.0004403	---	37.9	46.215	47	10	10	6	8	8	9	8	8	8	10	9	10	9	10	8	10	9	10	9	10	360180	382950	358120	560350	522990	584410	0.78	0.83	0.776	1.214	1.133	1.266	cytoplasm	GO:0044281 small molecule metabolic process; GO:0044763 single-organism cellular process; GO:0006807 nitrogen compound metabolic process; GO:0044699 single-organism process; GO:0009058 biosynthetic process; GO:0044238 primary metabolic process; GO:0044237 cellular metabolic process; GO:0071704 organic substance metabolic process; GO:0008152 metabolic process; GO:0006520 cellular amino acid metabo…		GO:0097159 organic cyclic compound binding; GO:1901363 heterocyclic compound binding; GO:0016769 transferase activity, transferring nitrogenous groups; GO:0003824 catalytic activity; GO:0005488 binding; GO:0043167 ion binding; GO:0043168 anion binding; GO:0008483 transaminase activity; GO:0016740 transferase activity; GO:0048037 cofactor binding; GO:0030170 pyridoxal phosphate binding;	K00815	TAT; tyrosine aminotransferase [EC:2.6.1.5]	mdm00130 Ubiquinone and other terpenoid-quinone biosynthesis - Malus domestica (apple); mdm00270 Cysteine and methionine metabolism - Malus domestica (apple); mdm00350 Tyrosine metabolism - Malus domestica (apple); mdm00360 Phenylalanine metabolism - Malus domestica (apple); mdm00400 Phenylalanine, tyrosine and tryptophan biosynthesis - Malus domestica (apple); mdm00950 Isoquinoline alkaloid bios…	IPR004839; IPR015424; IPR015422; IPR015421;	Aminotransferase, class I/classII; Pyridoxal phosphate-dependent transferase; Pyridoxal phosphate-dependent transferase, major region, subdomain 2; Pyridoxal phosphate-dependent transferase, major region, subdomain 1;
RchiOBHm_Chr5g0019581	Putative post-transcriptional gene silencing PAZ-Argonaute family	0.492	Down	0.005642	---	9.8	114.86	17	5	5	4	4	4	1	3	1	5	5	5	5	5	3	5	5	5	5	5	3	295140	205600	263540	127380	139750	108430	1.554	1.082	1.387	0.671	0.736	0.571	nucleus			GO:0097159 organic cyclic compound binding; GO:1901363 heterocyclic compound binding; GO:0005515 protein binding; GO:0005488 binding; GO:0003676 nucleic acid binding;	K11593	ELF2C, AGO; eukaryotic translation initiation factor 2C		IPR032472; IPR032474; IPR014811; IPR003165; IPR012337; IPR003100;	Argonaute linker 2 domain; Protein argonaute, N-terminal; Argonaute, linker 1 domain; Piwi domain; Ribonuclease H-like domain; PAZ domain;
RchiOBHm_Chr5g0033121	Putative triacylglycerol lipase	1.6	Up	0.00142121	---	38.6	40.585	36	10	10	4	6	7	6	7	6	8	7	9	9	8	8	8	7	9	9	8	8	265530	289100	273740	466800	463580	395390	0.74	0.805	0.762	1.3	1.291	1.101	extracellular			GO:0016787 hydrolase activity; GO:0003824 catalytic activity; GO:0016788 hydrolase activity, acting on ester bonds;				IPR001087; IPR013830;	GDSL lipase/esterase; SGNH hydrolase-type esterase domain;
RchiOBHm_Chr5g0020381	"Putative xylogalacturonan beta-1,3-xylosyltransferase"	0.473	Down	0.0003438	---	20.6	55.561	24	7	7	4	5	4	4	3	4	7	6	7	7	6	6	7	6	7	7	6	6	302680	268510	298630	122940	147020	141860	1.417	1.257	1.398	0.576	0.688	0.664	plasma membrane
RchiOBHm_Chr5g0033461	Putative protein kinase RLK-Pelle-DLSV family	12.277	Up	0.00134284	---	17.2	76.797	14	8	7	0	0	0	3	8	3	3	2	4	7	8	6	2	2	3	7	7	6	27250	12224	16534	196620	329940	161470	0.22	0.099	0.133	1.586	2.661	1.302	plasma membrane	GO:0016310 phosphorylation; GO:0044267 cellular protein metabolic process; GO:0044238 primary metabolic process; GO:0044237 cellular metabolic process; GO:0006796 phosphate-containing compound metabolic process; GO:0071704 organic substance metabolic process; GO:0008152 metabolic process; GO:0006468 protein phosphorylation; GO:0006793 phosphorus metabolic process; GO:0044260 cellular macromolecul…		GO:0005524 ATP binding; GO:1901265 nucleoside phosphate binding; GO:0016773 phosphotransferase activity, alcohol group as acceptor; GO:0001882 nucleoside binding; GO:0043167 ion binding; GO:0004672 protein kinase activity; GO:0000166 nucleotide binding; GO:0097159 organic cyclic compound binding; GO:1901363 heterocyclic compound binding; GO:0032549 ribonucleoside binding; GO:0097367 carbohydrate …				IPR000719; IPR002902; IPR013320; IPR011009;	Protein kinase domain; Gnk2-homologous domain; Concanavalin A-like lectin/glucanase domain; Protein kinase-like domain;
RchiOBHm_Chr5g0023141	Putative Caspase-like domain-containing protein	0.557	Down	0.0012616	---	64.4	45.204	141	24	24	31	28	23	23	17	19	24	24	23	22	22	21	24	24	23	22	22	21	12351000	12566000	11484000	7372200	6993900	5898800	1.308	1.331	1.216	0.781	0.741	0.625	cytoplasm							IPR029030;	Caspase-like domain;
RchiOBHm_Chr5g0034661	Putative peroxidase	1.661	Up	0.0086424	---	24.1	34.268	15	4	4	2	3	3	2	2	3	3	3	3	3	3	4	3	3	3	3	3	4	85985	93282	71194	133800	124590	157560	0.774	0.84	0.641	1.205	1.122	1.419	cytoplasm	GO:0008152 metabolic process; GO:0042743 hydrogen peroxide metabolic process; GO:0006950 response to stress; GO:0072593 reactive oxygen species metabolic process; GO:0055114 oxidation-reduction process; GO:0044710 single-organism metabolic process; GO:0006979 response to oxidative stress; GO:0044699 single-organism process; GO:0044248 cellular catabolic process; GO:0050896 response to stimulus; G…		GO:0097159 organic cyclic compound binding; GO:1901363 heterocyclic compound binding; GO:0020037 heme binding; GO:0003824 catalytic activity; GO:0005488 binding; GO:0016209 antioxidant activity; GO:0004601 peroxidase activity; GO:0046906 tetrapyrrole binding; GO:0016491 oxidoreductase activity; GO:0016684 oxidoreductase activity, acting on peroxide as acceptor;	K00430	E1.11.1.7; peroxidase [EC:1.11.1.7]	mdm00940 Phenylpropanoid biosynthesis - Malus domestica (apple); mdm01100 Metabolic pathways - Malus domestica (apple); mdm01110 Biosynthesis of secondary metabolites - Malus domestica (apple);	IPR033905; IPR002016;	Secretory peroxidase; Haem peroxidase, plant/fungal/bacterial;
RchiOBHm_Chr5g0024161	Putative protein kinase TKL-Pl-6 family	0.59	Down	0.0068	---	20.7	134.5	32	16	13	9	6	7	6	2	2	12	14	13	15	11	10	9	11	10	12	8	7	324520	349480	294740	204810	208900	157400	1.264	1.362	1.148	0.798	0.814	0.613	nucleus	GO:0016310 phosphorylation; GO:0044267 cellular protein metabolic process; GO:0044238 primary metabolic process; GO:0044237 cellular metabolic process; GO:0006796 phosphate-containing compound metabolic process; GO:0071704 organic substance metabolic process; GO:0008152 metabolic process; GO:0006468 protein phosphorylation; GO:0006793 phosphorus metabolic process; GO:0044260 cellular macromolecul…		GO:0005524 ATP binding; GO:1901265 nucleoside phosphate binding; GO:0016773 phosphotransferase activity, alcohol group as acceptor; GO:0001882 nucleoside binding; GO:0043167 ion binding; GO:0005515 protein binding; GO:0004672 protein kinase activity; GO:0000166 nucleotide binding; GO:0097159 organic cyclic compound binding; GO:1901363 heterocyclic compound binding; GO:0032549 ribonucleoside bindi…				IPR000270; IPR000719; IPR001245; IPR011009;	PB1 domain; Protein kinase domain; Serine-threonine/tyrosine-protein kinase catalytic domain; Protein kinase-like domain;
RchiOBHm_Chr5g0024291	PREDICTED: dedicator of cytokinesis protein 6 [Fragaria vesca subsp. vesca]	0.361	Down	0.00100167	---	55.1	19.915	14	5	5	4	3	4	1	1	1	4	4	5	3	4	3	4	4	5	3	4	3	79601	73486	97868	26034	34567	30043	1.398	1.291	1.719	0.457	0.607	0.528	nucleus				K21852	DOCK6_7_8; dedicator of cytokinesis protein 6/7/8
RchiOBHm_Chr5g0026151	Putative cyclin	0.602	Down	0.0145847	---	12.5	68.146	20	5	5	3	4	2	4	4	3	4	4	4	4	4	3	4	4	4	4	4	3	73048	72465	53143	39760	44170	35726	1.377	1.366	1.002	0.749	0.833	0.673	nucleus				K15188	CCNT; cyclin T		IPR013763; IPR006671;	Cyclin-like; Cyclin, N-terminal;
RchiOBHm_Chr5g0029381	"Putative alpha,alpha-trehalose-phosphate synthase (UDP-forming)"	0.413	Down	0.00084384	---	15.2	105.29	25	8	8	8	7	4	2	2	2	8	8	6	6	5	6	8	8	6	6	5	6	171880	178950	157540	79307	72488	58251	1.435	1.495	1.316	0.662	0.605	0.486	chloroplast	GO:0016051 carbohydrate biosynthetic process; GO:0044711 single-organism biosynthetic process; GO:0044763 single-organism cellular process; GO:0044699 single-organism process; GO:0009058 biosynthetic process; GO:0005984 disaccharide metabolic process; GO:0005975 carbohydrate metabolic process; GO:0009312 oligosaccharide biosynthetic process; GO:0044238 primary metabolic process; GO:0044237 cellul…		GO:0016758 transferase activity, transferring hexosyl groups; GO:0003824 catalytic activity; GO:0035251 UDP-glucosyltransferase activity; GO:0008194 UDP-glycosyltransferase activity; GO:0046527 glucosyltransferase activity; GO:0016757 transferase activity, transferring glycosyl groups; GO:0003825 alpha,alpha-trehalose-phosphate synthase (UDP-forming) activity; GO:0016740 transferase activity;	K16055	TPS; trehalose 6-phosphate synthase/phosphatase [EC:2.4.1.15 3.1.3.12]	mdm00500 Starch and sucrose metabolism - Malus domestica (apple); mdm01100 Metabolic pathways - Malus domestica (apple);	IPR012766; IPR001830; IPR023214;	Alpha,alpha-trehalose-phosphate synthase; Glycosyl transferase, family 20; HAD-like domain;
RchiOBHm_Chr5g0036051	Putative chlorophyll A-B binding protein	2.256	Up	0.028483	---	22.8	28.019	15	4	4	3	1	3	2	3	3	3	3	4	3	4	4	3	3	4	3	4	4	341880	447410	696290	1121200	852560	1378800	0.424	0.555	0.864	1.39	1.057	1.71	chloroplast				K08914	LHCB3; light-harvesting complex II chlorophyll a/b binding protein 3	mdm00196 Photosynthesis - antenna proteins - Malus domestica (apple); mdm01100 Metabolic pathways - Malus domestica (apple);	IPR023329;	Chlorophyll a/b binding protein domain;
RchiOBHm_Chr5g0032781	Putative protein kinase STE-STE20-YSK family	0.491	Down	0.02148	---	14.6	76.012	17	7	7	6	4	2	2	2	1	6	7	6	3	5	3	6	7	6	3	5	3	264360	235330	155760	105210	127270	89467	1.623	1.445	0.956	0.646	0.781	0.549	nucleus	GO:0016310 phosphorylation; GO:0044267 cellular protein metabolic process; GO:0044238 primary metabolic process; GO:0044237 cellular metabolic process; GO:0006796 phosphate-containing compound metabolic process; GO:0071704 organic substance metabolic process; GO:0008152 metabolic process; GO:0006468 protein phosphorylation; GO:0006793 phosphorus metabolic process; GO:0044260 cellular macromolecul…		GO:0005524 ATP binding; GO:1901265 nucleoside phosphate binding; GO:0016773 phosphotransferase activity, alcohol group as acceptor; GO:0001882 nucleoside binding; GO:0043167 ion binding; GO:0004672 protein kinase activity; GO:0000166 nucleotide binding; GO:0097159 organic cyclic compound binding; GO:1901363 heterocyclic compound binding; GO:0032549 ribonucleoside binding; GO:0097367 carbohydrate …	K08838	STK24_25_MST4; serine/threonine-protein kinase 24/25/MST4 [EC:2.7.11.1]		IPR000719; IPR011009;	Protein kinase domain; Protein kinase-like domain;
RchiOBHm_Chr5g0037761	"Putative thiazole biosynthetic enzyme Thi4 family, FAD/NAD(P)-binding domain-containing protein"	2.957	Up	0.00106261	---	48.6	37.51	51	11	11	3	6	4	13	11	14	9	9	8	11	10	11	9	9	8	11	10	11	563890	723360	578250	1655000	2221000	1638800	0.458	0.588	0.47	1.345	1.806	1.332	chloroplast	GO:0009110 vitamin biosynthetic process; GO:0006725 cellular aromatic compound metabolic process; GO:0044699 single-organism process; GO:0009058 biosynthetic process; GO:0042724 thiamine-containing compound biosynthetic process; GO:0050896 response to stimulus; GO:1901566 organonitrogen compound biosynthetic process; GO:0006772 thiamine metabolic process; GO:0044237 cellular metabolic process; GO…		GO:0003824 catalytic activity; GO:0016491 oxidoreductase activity;	K03146	THI4, THI1; thiamine thiazole synthase	mdm00730 Thiamine metabolism - Malus domestica (apple); mdm01100 Metabolic pathways - Malus domestica (apple);	IPR023753;	FAD/NAD(P)-binding domain;
RchiOBHm_Chr5g0041231	Putative beta-glucosidase	1.874	Up	0.00161556	---	18.2	55.778	19	6	5	1	2	2	4	5	5	3	4	4	4	5	5	3	4	4	4	5	4	83151	86695	95503	185660	166640	145080	0.654	0.682	0.751	1.46	1.311	1.141	cytoplasm	GO:0008152 metabolic process; GO:0005975 carbohydrate metabolic process; GO:0044238 primary metabolic process; GO:0071704 organic substance metabolic process;		GO:0004553 hydrolase activity, hydrolyzing O-glycosyl compounds; GO:0016787 hydrolase activity; GO:0003824 catalytic activity; GO:0016798 hydrolase activity, acting on glycosyl bonds;	K01188	E3.2.1.21; beta-glucosidase [EC:3.2.1.21]	mdm00460 Cyanoamino acid metabolism - Malus domestica (apple); mdm00500 Starch and sucrose metabolism - Malus domestica (apple); mdm00940 Phenylpropanoid biosynthesis - Malus domestica (apple); mdm01100 Metabolic pathways - Malus domestica (apple); mdm01110 Biosynthesis of secondary metabolites - Malus domestica (apple);	IPR017853; IPR013781;	Glycoside hydrolase superfamily; Glycoside hydrolase, catalytic domain;
RchiOBHm_Chr5g0034641	fiber (DUF1218) [Arabidopsis thaliana]	0.666	Down	0.024058	---	24.3	20.127	24	4	4	5	5	3	4	3	4	4	4	4	4	4	3	4	4	4	4	4	3	417240	356360	483680	300070	240750	297290	1.195	1.02	1.385	0.859	0.689	0.851	vacuolar membrane
RchiOBHm_Chr5g0034651	COP1-interacting protein 7 [Populus trichocarpa]	0.422	Down	0.00083513	---	18.3	133.66	30	12	12	6	11	7	2	2	2	12	12	11	6	8	5	12	12	11	6	8	5	211330	255000	215570	83776	95725	108390	1.307	1.578	1.334	0.518	0.592	0.671	nucleus
RchiOBHm_Chr5g0049251	Putative carboxylesterase	2.747	Up	0.00169821	---	23.2	35.867	18	5	5	3	2	1	5	4	3	5	5	4	5	3	4	5	5	4	5	3	4	94086	93861	70138	216770	282070	210460	0.584	0.582	0.435	1.344	1.749	1.305	cytoplasm	GO:0008152 metabolic process;		GO:0016787 hydrolase activity; GO:0003824 catalytic activity;				IPR029058; IPR013094;	Alpha/Beta hydrolase fold; Alpha/beta hydrolase fold-3;
RchiOBHm_Chr5g0050721	Putative acyl-CoA desaturase	3.138	Up	0.021899	---	13	33.968	6	3	3	0	1	0	2	2	1	2	2	1	3	3	3	2	2	1	3	3	3	21352	26837	0	86996	89179	50456	0.388	0.488		1.583	1.622	0.918	chloroplast	GO:0008152 metabolic process; GO:0055114 oxidation-reduction process; GO:0044710 single-organism metabolic process; GO:0044699 single-organism process; GO:0044238 primary metabolic process; GO:0071704 organic substance metabolic process; GO:0006629 lipid metabolic process;		GO:0016705 oxidoreductase activity, acting on paired donors, with incorporation or reduction of molecular oxygen; GO:0003824 catalytic activity; GO:0016717 oxidoreductase activity, acting on paired donors, with oxidation of a pair of donors resulting in the reduction of molecular oxygen to two molecules of water; GO:0016491 oxidoreductase activity;	K20416	FAD5; palmitoyl-[glycerolipid] 7-desaturase [EC:1.14.19.42]		IPR005804;	Fatty acid desaturase domain;
RchiOBHm_Chr5g0050781	Putative transaminase	3.162	Up	0.00188187	---	44.6	44.154	42	11	11	4	2	3	10	14	9	9	10	8	9	10	9	9	10	8	9	10	9	170560	126410	122450	389850	550720	384940	0.586	0.435	0.421	1.341	1.894	1.324	cytoplasm			GO:0003824 catalytic activity;	K00830	AGXT; alanine-glyoxylate transaminase / serine-glyoxylate transaminase / serine-pyruvate transaminase [EC:2.6.1.44 2.6.1.45 2.6.1.51]	mdm00250 Alanine, aspartate and glutamate metabolism - Malus domestica (apple); mdm00260 Glycine, serine and threonine metabolism - Malus domestica (apple); mdm00630 Glyoxylate and dicarboxylate metabolism - Malus domestica (apple); mdm01100 Metabolic pathways - Malus domestica (apple); mdm01110 Biosynthesis of secondary metabolites - Malus domestica (apple); mdm01200 Carbon metabolism - Malus do…	IPR015424; IPR000192; IPR015422; IPR015421;	Pyridoxal phosphate-dependent transferase; Aminotransferase class V domain; Pyridoxal phosphate-dependent transferase, major region, subdomain 2; Pyridoxal phosphate-dependent transferase, major region, subdomain 1;
RchiOBHm_Chr5g0035341	Putative Arf GTPase activating protein	0.593	Down	0.00069827	---	29.7	55.371	35	9	9	7	5	6	6	6	5	8	8	9	8	5	6	8	8	9	8	5	6	458240	432250	403940	247250	277390	242440	1.334	1.258	1.176	0.72	0.807	0.706	nucleus			GO:0098772 molecular function regulator; GO:0030234 enzyme regulator activity; GO:0008047 enzyme activator activity; GO:0060589 nucleoside-triphosphatase regulator activity; GO:0005096 GTPase activator activity; GO:0030695 GTPase regulator activity;	K12486	SMAP; stromal membrane-associated protein	mdm04144 Endocytosis - Malus domestica (apple);
RchiOBHm_Chr5g0053501	Putative hydrolase	1.554	Up	0.012003	---	27.2	104.43	45	14	13	9	7	7	7	8	7	10	11	13	11	11	12	10	11	13	10	11	12	357410	354410	271690	461620	535610	530550	0.854	0.847	0.649	1.103	1.28	1.268	plasma membrane	GO:0006810 transport; GO:0051179 localization; GO:0006812 cation transport; GO:0030001 metal ion transport; GO:0006811 ion transport; GO:0051234 establishment of localization;	GO:0031224 intrinsic component of membrane; GO:0016020 membrane; GO:0016021 integral component of membrane; GO:0044425 membrane part;	GO:0042625 ATPase coupled ion transmembrane transporter activity; GO:1901265 nucleoside phosphate binding; GO:0015399 primary active transmembrane transporter activity; GO:0022892 substrate-specific transporter activity; GO:0016817 hydrolase activity, acting on acid anhydrides; GO:0016787 hydrolase activity; GO:0005507 copper ion binding; GO:0022891 substrate-specific transmembrane transporter ac…	K17686	copA, ATP7; Cu+-exporting ATPase [EC:3.6.3.54]	mdm04016 MAPK signaling pathway - plant - Malus domestica (apple);	IPR006121; IPR008250; IPR023299; IPR006122; IPR023214;	Heavy metal-associated domain, HMA; P-type ATPase, A domain; P-type ATPase, cytoplasmic domain N; Heavy metal-associated domain, copper ion-binding; HAD-like domain;
RchiOBHm_Chr5g0036911	"PREDICTED: DAG protein, chloroplastic [Fragaria vesca subsp. vesca]"	0.62	Down	0.037596	---	28.8	25.666	9	3	3	2	2	2	1	1	1	3	3	3	2	2	3	3	3	3	2	2	3	134510	131660	108940	88764	87227	56647	1.328	1.3	1.076	0.876	0.861	0.559	chloroplast
RchiOBHm_Chr5g0041521	"Putative GrpE nucleotide exchange factor, EF-Hand 1, calcium-binding protein"	0.365	Down	0.00084228	---	18.8	33.432	15	4	4	4	2	3	1	3	2	4	4	3	4	3	4	4	4	3	4	3	4	158590	191170	152830	61731	69942	51578	1.387	1.672	1.337	0.54	0.612	0.451	mitochondria	GO:0006457 protein folding; GO:0009987 cellular process;		GO:1901265 nucleoside phosphate binding; GO:0051087 chaperone binding; GO:0060589 nucleoside-triphosphatase regulator activity; GO:0046983 protein dimerization activity; GO:0005515 protein binding; GO:0000166 nucleotide binding; GO:0098772 molecular function regulator; GO:1901363 heterocyclic compound binding; GO:0097159 organic cyclic compound binding; GO:0042802 identical protein binding; GO:00…	K03687	GRPE; molecular chaperone GrpE		IPR013805; IPR009012;	GrpE nucleotide exchange factor, coiled-coil; GrpE nucleotide exchange factor, head;
RchiOBHm_Chr5g0055091	Putative xenobiotic-transporting ATPase	1.554	Up	0.00079673	---	28	163.7	154	34	19	23	21	26	29	25	30	27	28	28	33	30	30	14	15	14	18	16	17	3504800	3581000	3149100	5594200	5111000	5202300	0.804	0.822	0.723	1.284	1.173	1.194	plasma membrane		GO:0016020 membrane;	GO:0005524 ATP binding; GO:1901265 nucleoside phosphate binding; GO:0001882 nucleoside binding; GO:0043167 ion binding; GO:0016817 hydrolase activity, acting on acid anhydrides; GO:0016787 hydrolase activity; GO:0000166 nucleotide binding; GO:0017111 nucleoside-triphosphatase activity; GO:0016887 ATPase activity; GO:0097159 organic cyclic compound binding; GO:1901363 heterocyclic compound binding…				IPR034001; IPR003593; IPR003439; IPR027417; IPR029481; IPR013581; IPR034003; IPR013525;	ATP-binding cassette transporter, PDR-like subfamily G, domain 1; AAA+ ATPase domain; ABC transporter-like; P-loop containing nucleoside triphosphate hydrolase; ABC-transporter extracellular N-terminal domain; Plant PDR ABC transporter associated; ATP-binding cassette transporter, PDR-like subfamily G, domain 2; ABC-2 type transporter;
RchiOBHm_Chr5g0055121	Putative iron-chelate-transporting ATPase	7.197	Up	0.0025227	---	31.8	163.81	136	37	6	15	11	8	37	30	35	25	24	17	37	34	32	4	4	2	6	5	5	1224700	1147800	516100	7723600	5407000	7654100	0.31	0.291	0.131	1.958	1.37	1.94	plasma membrane		GO:0016020 membrane;	GO:0005524 ATP binding; GO:1901265 nucleoside phosphate binding; GO:0001882 nucleoside binding; GO:0043167 ion binding; GO:0016817 hydrolase activity, acting on acid anhydrides; GO:0016787 hydrolase activity; GO:0000166 nucleotide binding; GO:0017111 nucleoside-triphosphatase activity; GO:0016887 ATPase activity; GO:0097159 organic cyclic compound binding; GO:1901363 heterocyclic compound binding…				IPR003439; IPR027417; IPR029481; IPR034001; IPR003593; IPR034003; IPR013581; IPR013525;	ABC transporter-like; P-loop containing nucleoside triphosphate hydrolase; ABC-transporter extracellular N-terminal domain; ATP-binding cassette transporter, PDR-like subfamily G, domain 1; AAA+ ATPase domain; ATP-binding cassette transporter, PDR-like subfamily G, domain 2; Plant PDR ABC transporter associated; ABC-2 type transporter;
RchiOBHm_Chr5g0042791	Putative gliding motility-associated protein GldE	0.282	Down	0.0180832	---	26	73.952	22	10	10	7	2	7	2	4	0	9	8	9	8	7	6	9	8	9	8	7	6	346810	251520	379860	66695	156450	52570	1.66	1.204	1.818	0.319	0.749	0.252	plasma membrane	GO:0044699 single-organism process; GO:0008152 metabolic process; GO:0055114 oxidation-reduction process; GO:0044710 single-organism metabolic process;		GO:0097159 organic cyclic compound binding; GO:1901363 heterocyclic compound binding; GO:0016614 oxidoreductase activity, acting on CH-OH group of donors; GO:1901265 nucleoside phosphate binding; GO:0050660 flavin adenine dinucleotide binding; GO:0003824 catalytic activity; GO:0005488 binding; GO:0043167 ion binding; GO:0043168 anion binding; GO:0000166 nucleotide binding; GO:0048037 cofactor bin…				IPR016166; IPR002550; IPR016169; IPR005170; IPR000644;	FAD-binding, type 2; Domain of unknown function DUF21; CO dehydrogenase flavoprotein-like, FAD-binding, subdomain 2; Transporter-associated domain; CBS domain;
RchiOBHm_Chr5g0056171	Putative glycerophosphodiester phosphodiesterase	2.364	Up	0.0045192	---	14.2	82.079	18	7	7	2	1	1	4	5	5	5	6	5	7	6	6	5	6	5	7	6	6	71227	58812	59391	122770	190210	134870	0.671	0.554	0.559	1.156	1.791	1.27	plasma membrane	GO:0044699 single-organism process; GO:0008152 metabolic process; GO:0044238 primary metabolic process; GO:0044710 single-organism metabolic process; GO:0006629 lipid metabolic process; GO:0071704 organic substance metabolic process;		GO:0008081 phosphoric diester hydrolase activity; GO:0016787 hydrolase activity; GO:0003824 catalytic activity; GO:0042578 phosphoric ester hydrolase activity; GO:0016788 hydrolase activity, acting on ester bonds;				IPR030395; IPR017946;	Glycerophosphodiester phosphodiesterase domain; PLC-like phosphodiesterase, TIM beta/alpha-barrel domain;
RchiOBHm_Chr5g0057621	"Putative AMP-dependent synthetase/ligase, AMP-binding enzyme domain-containing protein"	2.185	Up	0.00066368	---	28.4	59.144	17	9	1	3	3	3	3	3	2	8	8	8	7	8	8	1	1	1	1	1	1	54333	43992	56085	105750	114230	117400	0.663	0.537	0.684	1.29	1.394	1.432	plasma membrane	GO:0008152 metabolic process;		GO:0003824 catalytic activity;	K01904	4CL; 4-coumarate--CoA ligase [EC:6.2.1.12]	mdm00130 Ubiquinone and other terpenoid-quinone biosynthesis - Malus domestica (apple); mdm00940 Phenylpropanoid biosynthesis - Malus domestica (apple); mdm00999 Biosynthesis of secondary metabolites - unclassified - Malus domestica (apple); mdm01100 Metabolic pathways - Malus domestica (apple); mdm01110 Biosynthesis of secondary metabolites - Malus domestica (apple);	IPR025110; IPR000873;	AMP-binding enzyme C-terminal domain; AMP-dependent synthetase/ligase;
RchiOBHm_Chr5g0059081	"zinc finger, C3HC4 type family protein, putative [Medicago truncatula]"	3.512	Up	0.0083411	---	50.6	9.5568	15	3	3	3	2	1	2	3	4	3	3	3	2	2	3	3	3	3	2	2	3	25687	14365	29678	62993	78522	103460	0.49	0.274	0.566	1.201	1.497	1.973	chloroplast
RchiOBHm_Chr5g0059511	Putative lyase	4.82	Up	6.2359e-05	---	31.6	64.714	34	13	9	4	1	2	8	10	9	10	5	9	10	12	11	7	4	6	7	8	8	99890	78061	82216	377380	444950	432260	0.396	0.309	0.326	1.495	1.762	1.712	chloroplast	GO:0008152 metabolic process;		GO:0000287 magnesium ion binding; GO:0003824 catalytic activity; GO:0010333 terpene synthase activity; GO:0005488 binding; GO:0043167 ion binding; GO:0046872 metal ion binding; GO:0043169 cation binding; GO:0016829 lyase activity; GO:0016838 carbon-oxygen lyase activity, acting on phosphates; GO:0016835 carbon-oxygen lyase activity;	K15803	GERD; (-)-germacrene D synthase [EC:4.2.3.75]	mdm00909 Sesquiterpenoid and triterpenoid biosynthesis - Malus domestica (apple);	IPR005630; IPR008949; IPR008930; IPR001906;	Terpene synthase, metal-binding domain; Isoprenoid synthase domain; Terpenoid cyclases/protein prenyltransferase alpha-alpha toroid; Terpene synthase, N-terminal domain;
RchiOBHm_Chr5g0044701	"Putative ferredoxin [2Fe-2S], plant, Beta-grasp domain-containing protein"	0.616	Down	0.042463	---	26.8	16.414	11	2	2	2	2	2	2	2	1	2	2	2	2	2	2	2	2	2	2	2	2	402600	603570	366590	298070	284160	263060	1.089	1.633	0.992	0.806	0.769	0.712	chloroplast	GO:0008152 metabolic process; GO:0006091 generation of precursor metabolites and energy; GO:0044710 single-organism metabolic process; GO:0055114 oxidation-reduction process; GO:0044763 single-organism cellular process; GO:0022900 electron transport chain; GO:0044699 single-organism process; GO:0044237 cellular metabolic process; GO:0009987 cellular process;		GO:0009055 electron carrier activity; GO:0051537 2 iron, 2 sulfur cluster binding; GO:0005488 binding; GO:0051536 iron-sulfur cluster binding; GO:0051540 metal cluster binding;	K02639	petF; ferredoxin	mdm00195 Photosynthesis - Malus domestica (apple);	IPR001041; IPR012675;	2Fe-2S ferredoxin-type iron-sulfur binding domain; Beta-grasp domain;
RchiOBHm_Chr5g0060531	Putative rmlC-like jelly roll protein	5.707	Up	0.046424	---	13.6	53.49	8	4	2	0	0	0	2	3	3	3	2	1	3	3	3	1	1	0	1	1	2	45837	35609	0	104310	211460	381770	0.294	0.229		0.67	1.357	2.45	vacuolar membrane			GO:0045735 nutrient reservoir activity;				IPR011051; IPR006045; IPR014710;	RmlC-like cupin domain; Cupin 1; RmlC-like jelly roll fold;
RchiOBHm_Chr5g0048201	Putative protein kinase RLK-Pelle-LRR-IX family	0.562	Down	0.047058	---	5.1	105.68	8	4	4	1	2	2	1	1	1	3	3	3	2	1	2	3	3	3	2	1	2	62327	57278	75687	43675	0	29531	1.161	1.067	1.409	0.813		0.55	plasma membrane	GO:0016310 phosphorylation; GO:0044267 cellular protein metabolic process; GO:0044238 primary metabolic process; GO:0044237 cellular metabolic process; GO:0006796 phosphate-containing compound metabolic process; GO:0071704 organic substance metabolic process; GO:0008152 metabolic process; GO:0006468 protein phosphorylation; GO:0006793 phosphorus metabolic process; GO:0044260 cellular macromolecul…		GO:0005524 ATP binding; GO:1901265 nucleoside phosphate binding; GO:0016773 phosphotransferase activity, alcohol group as acceptor; GO:0001882 nucleoside binding; GO:0043167 ion binding; GO:0005515 protein binding; GO:0004672 protein kinase activity; GO:0000166 nucleotide binding; GO:0097159 organic cyclic compound binding; GO:1901363 heterocyclic compound binding; GO:0032549 ribonucleoside bindi…				IPR000719; IPR013210; IPR001245; IPR032675; IPR013320; IPR011009;	Protein kinase domain; Leucine-rich repeat-containing N-terminal, plant-type; Serine-threonine/tyrosine-protein kinase catalytic domain; Leucine-rich repeat domain, L domain-like; Concanavalin A-like lectin/glucanase domain; Protein kinase-like domain;
RchiOBHm_Chr5g0060591	Putative rmlC-like jelly roll protein	5.67	Up	0.0197785	---	18.1	53.371	10	6	5	0	0	0	4	1	5	4	3	1	5	4	5	3	3	1	4	3	5	30131	21910	0	191920	80876	169920	0.305	0.221		1.94	0.817	1.717	vacuolar membrane			GO:0045735 nutrient reservoir activity;				IPR011051; IPR006045; IPR014710;	RmlC-like cupin domain; Cupin 1; RmlC-like jelly roll fold;
RchiOBHm_Chr5g0061451	Putative mitogen-activated protein kinase CMGC-MAPK family	1.659	Up	9.6662e-05	---	47.6	42.631	58	14	11	7	8	8	10	13	12	13	14	12	13	14	14	10	11	10	10	11	11	448840	477650	434110	729300	768310	758700	0.745	0.792	0.72	1.21	1.275	1.259	cytoplasm	GO:0016310 phosphorylation; GO:0044267 cellular protein metabolic process; GO:0044238 primary metabolic process; GO:0044237 cellular metabolic process; GO:0006796 phosphate-containing compound metabolic process; GO:0071704 organic substance metabolic process; GO:0008152 metabolic process; GO:0006468 protein phosphorylation; GO:0006793 phosphorus metabolic process; GO:0044260 cellular macromolecul…		GO:0005524 ATP binding; GO:1901265 nucleoside phosphate binding; GO:0016773 phosphotransferase activity, alcohol group as acceptor; GO:0001882 nucleoside binding; GO:0043167 ion binding; GO:0004672 protein kinase activity; GO:0000166 nucleotide binding; GO:0004702 signal transducer, downstream of receptor, with serine/threonine kinase activity; GO:0004871 signal transducer activity; GO:0004707 MA…	K20536	MPK3; mitogen-activated protein kinase 3 [EC:2.7.11.24]	mdm04016 MAPK signaling pathway - plant - Malus domestica (apple);	IPR000719; IPR011009;	Protein kinase domain; Protein kinase-like domain;
RchiOBHm_Chr5g0061851	PREDICTED: BTB/POZ domain-containing protein At5g60050 [Fragaria vesca subsp. vesca]	2.498	Up	0.0037381	---	8.3	44.237	10	2	2	2	2	2	2	1	1	2	2	2	2	2	2	2	2	2	2	2	2	43093	29785	47879	101960	109020	90614	0.612	0.423	0.68	1.448	1.549	1.287	cytoplasm
RchiOBHm_Chr5g0062131	Putative chitinase	2.183	Up	0.00178106	---	25.7	33.52	45	7	7	6	5	6	8	11	9	7	7	7	7	7	7	7	7	7	7	7	7	790420	745000	586130	1395600	1685700	1551500	0.702	0.662	0.521	1.24	1.497	1.378	nucleus	GO:0008152 metabolic process; GO:0005975 carbohydrate metabolic process; GO:0044238 primary metabolic process; GO:0071704 organic substance metabolic process;		GO:0004553 hydrolase activity, hydrolyzing O-glycosyl compounds; GO:0016787 hydrolase activity; GO:0003824 catalytic activity; GO:0016798 hydrolase activity, acting on glycosyl bonds;				IPR001223; IPR017853; IPR013781;	Glycoside hydrolase family 18, catalytic domain; Glycoside hydrolase superfamily; Glycoside hydrolase, catalytic domain;
RchiOBHm_Chr5g0049481	"Putative glucan 1,3-beta-glucosidase"	0.666	Down	0.031262	---	41.1	68.055	53	18	15	8	9	10	10	9	7	15	15	17	16	15	16	13	14	15	14	13	14	1062900	905240	1088600	765440	736410	534910	1.252	1.066	1.282	0.902	0.867	0.63	plasma membrane	GO:0008152 metabolic process; GO:0005975 carbohydrate metabolic process; GO:0044238 primary metabolic process; GO:0071704 organic substance metabolic process;		GO:0004553 hydrolase activity, hydrolyzing O-glycosyl compounds; GO:0016787 hydrolase activity; GO:0003824 catalytic activity; GO:0016798 hydrolase activity, acting on glycosyl bonds;	K05349	bglX; beta-glucosidase [EC:3.2.1.21]	mdm00460 Cyanoamino acid metabolism - Malus domestica (apple); mdm00500 Starch and sucrose metabolism - Malus domestica (apple); mdm00940 Phenylpropanoid biosynthesis - Malus domestica (apple); mdm01100 Metabolic pathways - Malus domestica (apple); mdm01110 Biosynthesis of secondary metabolites - Malus domestica (apple);	IPR001764; IPR002772; IPR017853;	Glycoside hydrolase, family 3, N-terminal; Glycoside hydrolase family 3 C-terminal domain; Glycoside hydrolase superfamily;
RchiOBHm_Chr5g0052341	Putative assimilatory sulfite reductase (ferredoxin)	0.646	Down	0.0110774	---	36.9	77.56	85	19	19	17	12	20	12	12	12	18	17	19	18	18	17	18	17	19	18	18	17	3313900	2847600	2891400	2236600	1955200	1659800	1.334	1.146	1.164	0.9	0.787	0.668	cytoplasm	GO:0044699 single-organism process; GO:0008152 metabolic process; GO:0055114 oxidation-reduction process; GO:0044710 single-organism metabolic process;		GO:0097159 organic cyclic compound binding; GO:1901363 heterocyclic compound binding; GO:0020037 heme binding; GO:0016673 oxidoreductase activity, acting on a sulfur group of donors, iron-sulfur protein as acceptor; GO:0003824 catalytic activity; GO:0051536 iron-sulfur cluster binding; GO:0005488 binding; GO:0016667 oxidoreductase activity, acting on a sulfur group of donors; GO:0051539 4 iron, 4…	K00392	sir; sulfite reductase (ferredoxin) [EC:1.8.7.1]	mdm00920 Sulfur metabolism - Malus domestica (apple); mdm01100 Metabolic pathways - Malus domestica (apple);	IPR006067; IPR005117;	Nitrite/sulphite reductase 4Fe-4S domain; Nitrite/Sulfite reductase ferredoxin-like domain;
RchiOBHm_Chr5g0053031	Putative RNA-binding motif protein	0.481	Down	0.0086623	---	11.2	22.695	11	2	2	2	2	2	2	2	1	2	2	2	2	2	2	2	2	2	2	2	2	197550	197540	143250	80156	105450	73416	1.487	1.486	1.078	0.603	0.793	0.552	nucleus	GO:0006396 RNA processing; GO:0006725 cellular aromatic compound metabolic process; GO:1901360 organic cyclic compound metabolic process; GO:0006807 nitrogen compound metabolic process; GO:0044238 primary metabolic process; GO:0044237 cellular metabolic process; GO:0071704 organic substance metabolic process; GO:0016070 RNA metabolic process; GO:0008152 metabolic process; GO:0090304 nucleic acid …	GO:0043226 organelle; GO:0043231 intracellular membrane-bounded organelle; GO:0043229 intracellular organelle; GO:0005634 nucleus; GO:0044464 cell part; GO:0005622 intracellular; GO:0005737 cytoplasm; GO:0044424 intracellular part; GO:0043227 membrane-bounded organelle; GO:0005623 cell;	GO:0097159 organic cyclic compound binding; GO:1901363 heterocyclic compound binding; GO:0003729 mRNA binding; GO:0003723 RNA binding; GO:1901265 nucleoside phosphate binding; GO:0005488 binding; GO:0003676 nucleic acid binding; GO:0000166 nucleotide binding; GO:0036094 small molecule binding;	K12876	RBM8A, Y14; RNA-binding protein 8A	mdm03013 RNA transport - Malus domestica (apple); mdm03015 mRNA surveillance pathway - Malus domestica (apple); mdm03040 Spliceosome - Malus domestica (apple);	IPR033744; IPR000504; IPR012677;	RBM8, RNA recognition motif; RNA recognition motif domain; Nucleotide-binding alpha-beta plait domain;
RchiOBHm_Chr5g0055441	Putative glucomannan 4-beta-mannosyltransferase	0.181	Down	0.00016272	---	20.7	61.828	30	10	10	8	9	7	2	2	2	10	10	9	7	5	5	10	10	9	7	5	5	609390	542410	528610	126280	86523	92137	1.842	1.639	1.598	0.382	0.261	0.278	plasma membrane				K13680	CSLA; beta-mannan synthase [EC:2.4.1.32]		IPR029044;	Nucleotide-diphospho-sugar transferases;
RchiOBHm_Chr5g0057111	Putative Snf7 family protein	0.613	Down	0.023997	---	28.1	25.631	5	3	3	2	2	1	0	0	0	3	3	2	2	2	2	3	3	2	2	2	2	49409	68713	47419	32789	38289	30362	1.11	1.544	1.066	0.737	0.86	0.682	cytoplasm	GO:0006810 transport; GO:0051179 localization; GO:0007034 vacuolar transport; GO:0051234 establishment of localization;			K12193	VPS24, CHMP3; charged multivesicular body protein 3	mdm04144 Endocytosis - Malus domestica (apple);
RchiOBHm_Chr5g0057461	"Putative lysine methyltransferase, S-adenosyl-L-methionine-dependent methyltransferase"	0.638	Down	0.0132826	---	27.4	36.714	17	5	5	4	4	5	1	2	1	5	5	5	3	3	4	5	5	5	3	3	4	67746	69289	58417	45802	34260	44720	1.269	1.298	1.095	0.858	0.642	0.838	cytoplasm				K21806	VCPKMT, METTL21D; protein N-lysine methyltransferase METTL21D [EC:2.1.1.-]		IPR029063;	S-adenosyl-L-methionine-dependent methyltransferase;
RchiOBHm_Chr5g0066091	"Putative armadillo-like helical, nucleic acid binding NABP, pumilio, RNA binding protein"	2.146	Up	0.037358	---	10.5	116.18	15	6	6	2	3	3	2	3	2	3	5	4	3	5	5	3	5	4	3	5	5	41020	68157	28057	91955	88706	113720	0.57	0.947	0.39	1.278	1.233	1.581	nucleus			GO:0097159 organic cyclic compound binding; GO:1901363 heterocyclic compound binding; GO:0003723 RNA binding; GO:0005488 binding; GO:0003676 nucleic acid binding;	K17943	PUM; pumilio RNA-binding family		IPR012940; IPR011989; IPR033712; IPR016024; IPR033133;	Nucleic acid binding NABP; Armadillo-like helical; Pumilio, RNA binding domain; Armadillo-type fold; Pumilio homology domain;
RchiOBHm_Chr5g0059381	Putative protein disulfide-isomerase	0.434	Down	0.00171811	---	45	63.626	91	21	21	17	18	17	13	16	10	19	20	21	19	21	18	19	20	21	19	21	18	3385000	3349800	3072100	1489800	1634800	1138200	1.444	1.429	1.31	0.635	0.697	0.485	chloroplast	GO:0050794 regulation of cellular process; GO:0042592 homeostatic process; GO:0065008 regulation of biological quality; GO:0050789 regulation of biological process; GO:0045454 cell redox homeostasis; GO:0044763 single-organism cellular process; GO:0019725 cellular homeostasis; GO:0044699 single-organism process; GO:0009987 cellular process; GO:0065007 biological regulation;	GO:0043226 organelle; GO:0043231 intracellular membrane-bounded organelle; GO:0043229 intracellular organelle; GO:0005783 endoplasmic reticulum; GO:0044464 cell part; GO:0005622 intracellular; GO:0005737 cytoplasm; GO:0012505 endomembrane system; GO:0044424 intracellular part; GO:0043227 membrane-bounded organelle; GO:0005623 cell; GO:0044444 cytoplasmic part;	GO:0016853 isomerase activity; GO:0003824 catalytic activity;	K09580	PDIA1, P4HB; protein disulfide-isomerase A1 [EC:5.3.4.1]	mdm04141 Protein processing in endoplasmic reticulum - Malus domestica (apple);	IPR005788; IPR013766; IPR012336;	Disulphide isomerase; Thioredoxin domain; Thioredoxin-like fold;
RchiOBHm_Chr5g0061821	Putative protein kinase AGC-RSK-2 family	0.397	Down	0.004637	---	31.2	105.44	80	20	15	17	19	13	10	9	12	17	17	16	16	13	13	12	12	12	11	8	9	1540500	1551200	1157000	483490	483060	717470	1.558	1.569	1.17	0.489	0.489	0.726	nucleus	GO:0050794 regulation of cellular process; GO:0044700 single organism signaling; GO:0016310 phosphorylation; GO:0051716 cellular response to stimulus; GO:0035556 intracellular signal transduction; GO:0044267 cellular protein metabolic process; GO:0044699 single-organism process; GO:0000160 phosphorelay signal transduction system; GO:0044238 primary metabolic process; GO:0023052 signaling; GO:0050…		GO:1901265 nucleoside phosphate binding; GO:0016773 phosphotransferase activity, alcohol group as acceptor; GO:0004672 protein kinase activity; GO:0016775 phosphotransferase activity, nitrogenous group as acceptor; GO:0004871 signal transducer activity; GO:1901363 heterocyclic compound binding; GO:0097159 organic cyclic compound binding; GO:0016301 kinase activity; GO:0032553 ribonucleotide bindi…	K20715	PHOT; phototropin [EC:2.7.11.1]		IPR000719; IPR000014; IPR000700; IPR011009;	Protein kinase domain; PAS domain; PAS-associated, C-terminal; Protein kinase-like domain;
RchiOBHm_Chr5g0062081	Putative plus-end-directed kinesin ATPase	0.257	Down	0.000184998	---	8.7	117.7	21	7	7	5	6	7	1	1	1	6	7	7	3	3	3	6	7	7	3	3	3	100490	115650	115090	27911	24048	33207	1.448	1.666	1.658	0.402	0.347	0.478	nucleus	GO:0044763 single-organism cellular process; GO:0007018 microtubule-based movement; GO:0006928 movement of cell or subcellular component; GO:0044699 single-organism process; GO:0009987 cellular process; GO:0007017 microtubule-based process;		GO:0003774 motor activity; GO:1901265 nucleoside phosphate binding; GO:0016817 hydrolase activity, acting on acid anhydrides; GO:0005515 protein binding; GO:0016787 hydrolase activity; GO:0097159 organic cyclic compound binding; GO:1901363 heterocyclic compound binding; GO:0008092 cytoskeletal protein binding; GO:0016462 pyrophosphatase activity; GO:0003824 catalytic activity; GO:0032553 ribonucl…	K10398	KIF11, EG5; kinesin family member 11		IPR027417; IPR001752;	P-loop containing nucleoside triphosphate hydrolase; Kinesin motor domain;
RchiOBHm_Chr5g0066721	Putative transferase	2.529	Up	0.000184099	---	18.2	50.401	24	6	5	5	2	1	5	6	5	5	5	5	5	6	5	4	4	4	4	5	4	79768	78086	68990	196270	205680	172110	0.598	0.585	0.517	1.47	1.541	1.289	chloroplast			GO:0016746 transferase activity, transferring acyl groups; GO:0016747 transferase activity, transferring acyl groups other than amino-acyl groups; GO:0003824 catalytic activity; GO:0016740 transferase activity;	K13065	E2.3.1.133, HCT; shikimate O-hydroxycinnamoyltransferase [EC:2.3.1.133]	mdm00940 Phenylpropanoid biosynthesis - Malus domestica (apple); mdm00941 Flavonoid biosynthesis - Malus domestica (apple); mdm00945 Stilbenoid, diarylheptanoid and gingerol biosynthesis - Malus domestica (apple); mdm01100 Metabolic pathways - Malus domestica (apple); mdm01110 Biosynthesis of secondary metabolites - Malus domestica (apple);	IPR023213;	Chloramphenicol acetyltransferase-like domain;
RchiOBHm_Chr5g0068641	Putative phosphomethylpyrimidine synthase	0.561	Down	0.000138451	---	23.3	72.422	47	9	8	10	8	8	8	6	7	8	8	9	8	9	9	7	7	8	7	8	8	469950	513220	509950	295120	272420	269370	1.21	1.322	1.313	0.76	0.702	0.694	chloroplast	GO:0009110 vitamin biosynthetic process; GO:0006725 cellular aromatic compound metabolic process; GO:0044699 single-organism process; GO:0009058 biosynthetic process; GO:0042724 thiamine-containing compound biosynthetic process; GO:1901566 organonitrogen compound biosynthetic process; GO:0006772 thiamine metabolic process; GO:0044237 cellular metabolic process; GO:0044272 sulfur compound biosynth…		GO:0051536 iron-sulfur cluster binding; GO:0005488 binding; GO:0051540 metal cluster binding;	K03147	thiC; phosphomethylpyrimidine synthase [EC:4.1.99.17]	mdm00730 Thiamine metabolism - Malus domestica (apple); mdm01100 Metabolic pathways - Malus domestica (apple);
RchiOBHm_Chr5g0068691	Putative phosphomethylpyrimidine synthase	0.462	Down	0.00110425	---	28.4	10.417	12	3	2	2	3	3	1	2	1	3	3	3	3	3	3	2	2	2	2	2	2	87649	94148	105150	50227	43525	38633	1.254	1.347	1.505	0.719	0.623	0.553	chloroplast				K03147	thiC; phosphomethylpyrimidine synthase [EC:4.1.99.17]	mdm00730 Thiamine metabolism - Malus domestica (apple); mdm01100 Metabolic pathways - Malus domestica (apple);
RchiOBHm_Chr5g0069871	Putative ribosomal protein S18	0.64	Down	0.00114175	---	10.4	30.182	9	2	2	2	2	2	1	1	1	2	2	2	2	2	2	2	2	2	2	2	2	104580	95109	94469	66625	63853	57697	1.301	1.183	1.175	0.829	0.794	0.718	chloroplast	GO:0006518 peptide metabolic process; GO:0043043 peptide biosynthetic process; GO:0044267 cellular protein metabolic process; GO:0006807 nitrogen compound metabolic process; GO:0009058 biosynthetic process; GO:0043603 cellular amide metabolic process; GO:0044238 primary metabolic process; GO:1901566 organonitrogen compound biosynthetic process; GO:1901576 organic substance biosynthetic process; G…	GO:0005840 ribosome; GO:0043226 organelle; GO:0043229 intracellular organelle; GO:0043232 intracellular non-membrane-bounded organelle; GO:0044464 cell part; GO:0005622 intracellular; GO:0005737 cytoplasm; GO:0032991 macromolecular complex; GO:0044424 intracellular part; GO:1990904 ribonucleoprotein complex; GO:0005623 cell; GO:0030529 intracellular ribonucleoprotein complex; GO:0044444 cytoplasm…	GO:0003735 structural constituent of ribosome; GO:0005198 structural molecule activity;
RchiOBHm_Chr5g0070341	Putative PH domain-containing protein	0.418	Down	0.0117042	---	68.7	24.253	45	10	10	11	9	9	5	5	6	9	9	9	7	8	7	9	9	9	7	8	7	1473700	1393100	1026800	433630	735820	456050	1.602	1.514	1.116	0.471	0.8	0.496	mitochondria	GO:0006810 transport; GO:0046907 intracellular transport; GO:0051649 establishment of localization in cell; GO:0051179 localization; GO:0051234 establishment of localization; GO:0051641 cellular localization;			K15306	RANBP1; Ran-binding protein 1		IPR000156; IPR011993;	Ran binding domain; PH domain-like;
RchiOBHm_Chr5g0066761	Putative transferase	2.221	Up	4.1996e-05	---	17.2	50.273	22	5	4	3	1	2	5	5	6	5	5	5	5	5	5	4	4	4	4	4	4	93061	92354	101900	209740	223970	204470	0.603	0.599	0.661	1.36	1.452	1.326	cytoplasm			GO:0016746 transferase activity, transferring acyl groups; GO:0016747 transferase activity, transferring acyl groups other than amino-acyl groups; GO:0003824 catalytic activity; GO:0016740 transferase activity;	K13065	E2.3.1.133, HCT; shikimate O-hydroxycinnamoyltransferase [EC:2.3.1.133]	mdm00940 Phenylpropanoid biosynthesis - Malus domestica (apple); mdm00941 Flavonoid biosynthesis - Malus domestica (apple); mdm00945 Stilbenoid, diarylheptanoid and gingerol biosynthesis - Malus domestica (apple); mdm01100 Metabolic pathways - Malus domestica (apple); mdm01110 Biosynthesis of secondary metabolites - Malus domestica (apple);	IPR023213;	Chloramphenicol acetyltransferase-like domain;
RchiOBHm_Chr5g0073181	Putative DNA helicase	0.615	Down	0.0094822	---	16.3	23.521	12	3	3	1	2	4	1	2	2	3	3	3	3	3	3	3	3	3	3	3	3	163000	138530	140840	75450	102600	94025	1.369	1.163	1.183	0.634	0.862	0.79	cytoplasm	GO:0008152 metabolic process; GO:0006725 cellular aromatic compound metabolic process; GO:0046483 heterocycle metabolic process; GO:0006139 nucleobase-containing compound metabolic process; GO:1901360 organic cyclic compound metabolic process; GO:0006807 nitrogen compound metabolic process; GO:0034641 cellular nitrogen compound metabolic process; GO:0044238 primary metabolic process; GO:0009987 c…		GO:0097159 organic cyclic compound binding; GO:1901363 heterocyclic compound binding; GO:0003824 catalytic activity; GO:0005488 binding; GO:0003676 nucleic acid binding; GO:0016788 hydrolase activity, acting on ester bonds; GO:0004518 nuclease activity; GO:0004527 exonuclease activity; GO:0008408 3'-5' exonuclease activity; GO:0016787 hydrolase activity;	K20777	EXD2; exonuclease 3'-5' domain-containing protein 2 [EC:3.1.11.1]		IPR012337; IPR002562;	Ribonuclease H-like domain; 3'-5' exonuclease domain;
RchiOBHm_Chr5g0074821	"Putative STAR protein, homodimerization region"	0.635	Down	0.0147415	---	29.9	32.498	18	6	6	3	3	2	3	3	4	4	6	4	5	5	6	4	6	4	5	5	6	233820	220120	187350	158550	132570	116450	1.338	1.259	1.072	0.907	0.758	0.666	chloroplast			GO:0097159 organic cyclic compound binding; GO:1901363 heterocyclic compound binding; GO:0003723 RNA binding; GO:0005488 binding; GO:0003676 nucleic acid binding;	K14945	QKI; protein quaking		IPR004087; IPR032377; IPR004088;	K Homology domain; STAR protein, homodimerisation region; K Homology domain, type 1;
RchiOBHm_Chr5g0076481	Putative WEB family protein	0.51	Down	0.039936	---	15.4	72.186	20	6	6	3	6	4	2	3	2	4	6	4	4	4	3	4	6	4	4	4	3	146540	151810	145780	56654	91904	78137	1.311	1.358	1.304	0.507	0.822	0.699	nucleus
RchiOBHm_Chr5g0073811	"Putative STAR protein, homodimerization region"	2.322	Up	0.011856	---	38.9	31.432	24	7	7	2	4	1	7	5	5	6	6	5	7	6	7	6	6	5	7	6	7	119780	109490	87353	303700	256510	174910	0.683	0.625	0.498	1.733	1.463	0.998	chloroplast			GO:0097159 organic cyclic compound binding; GO:1901363 heterocyclic compound binding; GO:0003723 RNA binding; GO:0005488 binding; GO:0003676 nucleic acid binding;	K14945	QKI; protein quaking		IPR032377; IPR004087; IPR004088;	STAR protein, homodimerisation region; K Homology domain; K Homology domain, type 1;
RchiOBHm_Chr5g0081531	"6,7-dimethyl-8-ribityllumazine synthase [Arabidopsis thaliana]"	0.435	Down	0.0153628	---	21.5	28.256	12	3	3	3	2	2	2	2	1	3	3	3	3	3	3	3	3	3	3	3	3	125130	95667	93194	46324	59279	30968	1.666	1.274	1.241	0.617	0.789	0.412	nucleus
RchiOBHm_Chr5g0081561	Putative plant lipid transfer protein/Par allergen	0.613	Down	0.0072847	---	16.4	20.734	6	2	2	1	1	1	1	1	1	2	2	1	2	2	2	2	2	1	2	2	2	115200	112580	0	73465	62060	74077	1.317	1.287		0.84	0.709	0.847	plasma membrane	GO:0006810 transport; GO:0006869 lipid transport; GO:1902578 single-organism localization; GO:0044699 single-organism process; GO:0010876 lipid localization; GO:0071702 organic substance transport; GO:0033036 macromolecule localization; GO:0051179 localization; GO:0044765 single-organism transport; GO:0051234 establishment of localization;		GO:0008289 lipid binding; GO:0005488 binding;				IPR016140;	Bifunctional inhibitor/plant lipid transfer protein/seed storage helical domain;
RchiOBHm_Chr5g0077961	Putative glycosidase	17.927	Up	1.8058e-05	---	46.4	61.708	48	19	7	4	5	5	11	11	12	16	13	13	19	19	18	5	5	5	7	7	6	464230	438310	347200	6555700	8520200	7303900	0.118	0.111	0.088	1.665	2.163	1.855	chloroplast	GO:0008152 metabolic process; GO:0005975 carbohydrate metabolic process; GO:0044238 primary metabolic process; GO:0071704 organic substance metabolic process;		GO:0004553 hydrolase activity, hydrolyzing O-glycosyl compounds; GO:0016787 hydrolase activity; GO:0003824 catalytic activity; GO:0016798 hydrolase activity, acting on glycosyl bonds;	K01188	E3.2.1.21; beta-glucosidase [EC:3.2.1.21]	mdm00460 Cyanoamino acid metabolism - Malus domestica (apple); mdm00500 Starch and sucrose metabolism - Malus domestica (apple); mdm00940 Phenylpropanoid biosynthesis - Malus domestica (apple); mdm01100 Metabolic pathways - Malus domestica (apple); mdm01110 Biosynthesis of secondary metabolites - Malus domestica (apple);	IPR017853; IPR013781;	Glycoside hydrolase superfamily; Glycoside hydrolase, catalytic domain;
RchiOBHm_Chr5g0082811	Putative RNA helicase	0.616	Down	0.0023978	---	38.4	66.103	82	20	12	17	14	15	12	13	11	19	20	18	15	18	16	11	12	10	8	10	9	1704800	1408500	1384200	894400	964550	912740	1.407	1.163	1.143	0.738	0.796	0.753	nucleus			GO:0005524 ATP binding; GO:1901265 nucleoside phosphate binding; GO:0001882 nucleoside binding; GO:0043167 ion binding; GO:0000166 nucleotide binding; GO:0097159 organic cyclic compound binding; GO:1901363 heterocyclic compound binding; GO:0032549 ribonucleoside binding; GO:0097367 carbohydrate derivative binding; GO:0032553 ribonucleotide binding; GO:0005488 binding; GO:0003676 nucleic acid bind…	K11594	DDX3X, bel; ATP-dependent RNA helicase DDX3X [EC:3.6.4.13]		IPR011545; IPR014014; IPR014001; IPR027417; IPR001650;	DEAD/DEAH box helicase domain; RNA helicase, DEAD-box type, Q motif; Helicase superfamily 1/2, ATP-binding domain; P-loop containing nucleoside triphosphate hydrolase; Helicase, C-terminal;
RchiOBHm_Chr5g0084141	Putative L-ascorbate oxidase	10.121	Up	0.00110385	---	22.6	62.088	18	8	8	0	0	0	7	6	5	3	4	0	8	7	8	3	4	0	8	7	8	24027	30405	0	267090	219830	338960	0.136	0.173		1.517	1.249	1.925	endoplasmic reticulum	GO:0044699 single-organism process; GO:0008152 metabolic process; GO:0055114 oxidation-reduction process; GO:0044710 single-organism metabolic process;		GO:0046914 transition metal ion binding; GO:0003824 catalytic activity; GO:0005488 binding; GO:0043167 ion binding; GO:0046872 metal ion binding; GO:0043169 cation binding; GO:0005507 copper ion binding; GO:0016491 oxidoreductase activity;	K00423	E1.10.3.3; L-ascorbate oxidase [EC:1.10.3.3]	mdm00053 Ascorbate and aldarate metabolism - Malus domestica (apple); mdm01100 Metabolic pathways - Malus domestica (apple);	IPR034271; IPR011707; IPR008972; IPR011706; IPR001117;	Ascorbate oxidase homologue, second cupredoxin domain; Multicopper oxidase, type 3; Cupredoxin; Multicopper oxidase, type 2; Multicopper oxidase, type 1;
RchiOBHm_Chr6g0244251	Putative transcription factor interactor and regulator CCHC(Zn) family	0.591	Down	0.00146135	---	41.2	18.908	21	4	4	5	4	3	3	3	3	4	4	4	4	4	4	4	4	4	4	4	4	2858400	2955900	2589400	1635600	1824000	1508600	1.283	1.326	1.162	0.734	0.818	0.677	mitochondria	GO:0050794 regulation of cellular process; GO:0010468 regulation of gene expression; GO:0006355 regulation of transcription, DNA-templated; GO:0031326 regulation of cellular biosynthetic process; GO:0080090 regulation of primary metabolic process; GO:0060255 regulation of macromolecule metabolic process; GO:0019219 regulation of nucleobase-containing compound metabolic process; GO:0010556 regulat…		GO:0097159 organic cyclic compound binding; GO:1901363 heterocyclic compound binding; GO:0003677 DNA binding; GO:0046914 transition metal ion binding; GO:0005488 binding; GO:0043167 ion binding; GO:0003676 nucleic acid binding; GO:0046872 metal ion binding; GO:0043169 cation binding; GO:0008270 zinc ion binding;				IPR011129; IPR012340; IPR001878; IPR002059;	Cold shock domain; Nucleic acid-binding, OB-fold; Zinc finger, CCHC-type; Cold-shock protein, DNA-binding;
RchiOBHm_Chr6g0245611	Putative ER lumen protein retaining receptor	0.331	Down	0.023799	---	10.3	30.65	8	2	2	1	1	2	1	2	1	2	2	2	2	2	1	2	2	2	2	2	1	113750	88410	168140	44898	36749	0	1.258	0.978	1.86	0.497	0.407		chloroplast	GO:0051220 cytoplasmic sequestering of protein; GO:0065008 regulation of biological quality; GO:0032507 maintenance of protein location in cell; GO:0045185 maintenance of protein location; GO:0006621 protein retention in ER lumen; GO:0044763 single-organism cellular process; GO:0044699 single-organism process; GO:0051641 cellular localization; GO:0072595 maintenance of protein localization in org…	GO:0031224 intrinsic component of membrane; GO:0016020 membrane; GO:0016021 integral component of membrane; GO:0044425 membrane part;	GO:0005048 signal sequence binding; GO:0046923 ER retention sequence binding; GO:0033218 amide binding; GO:0042277 peptide binding; GO:0005488 binding;
RchiOBHm_Chr6g0249341	Putative fructokinase	9.77	Up	0.00073749	---	35	34.523	17	7	6	1	0	0	6	4	6	5	4	3	7	6	5	5	4	3	6	5	5	17777	22228	28650	207200	155290	307820	0.144	0.18	0.233	1.682	1.261	2.499	cytoplasm			GO:0016773 phosphotransferase activity, alcohol group as acceptor; GO:0003824 catalytic activity; GO:0016740 transferase activity; GO:0016772 transferase activity, transferring phosphorus-containing groups;	K00847	E2.7.1.4, scrK; fructokinase [EC:2.7.1.4]	mdm00051 Fructose and mannose metabolism - Malus domestica (apple); mdm00500 Starch and sucrose metabolism - Malus domestica (apple); mdm00520 Amino sugar and nucleotide sugar metabolism - Malus domestica (apple); mdm01100 Metabolic pathways - Malus domestica (apple);	IPR011611; IPR029056;	Carbohydrate kinase PfkB; Ribokinase-like;
RchiOBHm_Chr6g0249641	"Putative leucine-rich repeat domain, L domain-containing protein"	1.518	Up	0.00023628	---	28.6	57.459	38	9	9	6	6	6	7	5	8	8	7	8	9	7	8	8	7	8	9	7	8	304160	337170	309360	490090	474710	477940	0.762	0.845	0.776	1.229	1.19	1.198	cytoplasm			GO:0005515 protein binding; GO:0005488 binding;				IPR032675;	Leucine-rich repeat domain, L domain-like;
RchiOBHm_Chr6g0246311	nicotiana tabacum ORF protein [Medicago truncatula]	0.561	Down	0.0036811	---	23.6	45.586	24	6	6	4	4	5	3	4	4	5	5	5	5	5	6	5	5	5	5	5	6	228520	226710	242980	135020	108330	148560	1.258	1.248	1.337	0.743	0.596	0.818	chloroplast
RchiOBHm_Chr6g0249441	Putative DNA repair protein Rad52/59/22	0.614	Down	0.039015	---	23.9	21	15	3	3	2	3	3	3	3	1	3	3	2	3	3	2	3	3	2	3	3	2	193890	160000	166290	133210	108560	77477	1.386	1.144	1.189	0.952	0.776	0.554	mitochondria	GO:0033554 cellular response to stress; GO:0051716 cellular response to stimulus; GO:0006725 cellular aromatic compound metabolic process; GO:0006950 response to stress; GO:0006259 DNA metabolic process; GO:1901360 organic cyclic compound metabolic process; GO:0006807 nitrogen compound metabolic process; GO:0044238 primary metabolic process; GO:0050896 response to stimulus; GO:0044237 cellular me…
RchiOBHm_Chr6g0249631	Putative sucrose-phosphate synthase	0.664	Down	0.026021	---	12.5	115.47	28	10	10	4	5	8	5	5	1	9	9	10	8	8	6	9	9	10	8	8	6	382870	301480	259660	200350	211480	214830	1.463	1.152	0.992	0.765	0.808	0.821	nucleus	GO:0044723 single-organism carbohydrate metabolic process; GO:0008152 metabolic process; GO:0005985 sucrose metabolic process; GO:0044262 cellular carbohydrate metabolic process; GO:0044710 single-organism metabolic process; GO:0044763 single-organism cellular process; GO:0044699 single-organism process; GO:0009311 oligosaccharide metabolic process; GO:0005984 disaccharide metabolic process; GO:0…		GO:0016758 transferase activity, transferring hexosyl groups; GO:0003824 catalytic activity; GO:0046524 sucrose-phosphate synthase activity; GO:0035251 UDP-glucosyltransferase activity; GO:0008194 UDP-glycosyltransferase activity; GO:0046527 glucosyltransferase activity; GO:0016757 transferase activity, transferring glycosyl groups; GO:0016157 sucrose synthase activity; GO:0016740 transferase act…	K00696	E2.4.1.14; sucrose-phosphate synthase [EC:2.4.1.14]	mdm00500 Starch and sucrose metabolism - Malus domestica (apple); mdm01100 Metabolic pathways - Malus domestica (apple);	IPR006380; IPR000368; IPR001296;	Sucrose-phosphatase, N-terminal; Sucrose synthase; Glycosyl transferase, family 1;
RchiOBHm_Chr6g0251101	"Putative leucine-rich repeat-containing, plant-type, leucine-rich repeat domain, L"	1.679	Up	0.0007552	---	31.4	52.825	40	10	10	5	5	4	9	8	9	9	8	8	9	10	9	9	8	8	9	10	9	243330	245590	277900	401470	431420	454120	0.711	0.717	0.812	1.173	1.26	1.327	chloroplast			GO:0005515 protein binding; GO:0005488 binding;				IPR013210; IPR032675;	Leucine-rich repeat-containing N-terminal, plant-type; Leucine-rich repeat domain, L domain-like;
RchiOBHm_Chr6g0252261	Putative senescence/spartin-associated	1.656	Up	0.000116154	---	53.8	46.485	81	16	16	13	13	11	15	14	15	13	15	12	12	15	14	13	15	12	12	15	14	918450	851000	874250	1422600	1531600	1421000	0.785	0.727	0.747	1.216	1.309	1.215	chloroplast				K19366	SPG20; spartin	mdm04144 Endocytosis - Malus domestica (apple);	IPR009686;	Senescence/spartin-associated;
RchiOBHm_Chr6g0252801	"Putative small GTPase superfamily, ARF/SAR type, P-loop containing nucleoside triphosphate hydrolase"	1.683	Up	0.000196105	---	69.6	20.865	66	11	8	9	8	9	15	15	10	10	10	9	11	11	10	7	7	6	8	8	7	721230	749210	692840	1138600	1235900	1266000	0.746	0.775	0.716	1.177	1.278	1.309	nucleus	GO:0050794 regulation of cellular process; GO:0044700 single organism signaling; GO:0051716 cellular response to stimulus; GO:0007165 signal transduction; GO:0050789 regulation of biological process; GO:0007154 cell communication; GO:0035556 intracellular signal transduction; GO:0044699 single-organism process; GO:0007264 small GTPase mediated signal transduction; GO:0023052 signaling; GO:0050896…	GO:0005623 cell; GO:0005622 intracellular; GO:0044464 cell part;	GO:1901265 nucleoside phosphate binding; GO:0001882 nucleoside binding; GO:0043167 ion binding; GO:0000166 nucleotide binding; GO:0097159 organic cyclic compound binding; GO:1901363 heterocyclic compound binding; GO:0032549 ribonucleoside binding; GO:0097367 carbohydrate derivative binding; GO:0032553 ribonucleotide binding; GO:0005488 binding; GO:0032550 purine ribonucleoside binding; GO:0043168…	K07955	ARL8; ADP-ribosylation factor-like protein 8		IPR005225; IPR027417;	Small GTP-binding protein domain; P-loop containing nucleoside triphosphate hydrolase;
RchiOBHm_Chr6g0250411	Putative dynamin GTPase	0.584	Down	0.00076066	---	50	99.98	128	34	34	27	27	21	16	21	16	33	32	30	28	28	32	33	32	30	28	28	32	2902800	2761500	2499500	1473000	1674000	1619200	1.347	1.281	1.16	0.684	0.777	0.751	nucleus			GO:1901265 nucleoside phosphate binding; GO:0001882 nucleoside binding; GO:0043167 ion binding; GO:0016817 hydrolase activity, acting on acid anhydrides; GO:0016787 hydrolase activity; GO:0000166 nucleotide binding; GO:0017111 nucleoside-triphosphatase activity; GO:0097159 organic cyclic compound binding; GO:1901363 heterocyclic compound binding; GO:0032549 ribonucleoside binding; GO:0097367 carb…	K01528	DNM; dynamin GTPase [EC:3.6.5.5]	mdm04144 Endocytosis - Malus domestica (apple);	IPR030381; IPR003130; IPR011993; IPR001401; IPR020850; IPR027417; IPR000375; IPR001849;	Dynamin-type guanine nucleotide-binding (G) domain; Dynamin GTPase effector; PH domain-like; Dynamin, GTPase domain; GTPase effector domain; P-loop containing nucleoside triphosphate hydrolase; Dynamin central domain; Pleckstrin homology domain;
RchiOBHm_Chr6g0254831	plant basic secretory family protein [Populus trichocarpa]	6.134	Up	0.00171766	---	31	24.819	31	8	8	3	2	2	9	9	6	4	5	6	6	7	5	4	5	6	6	7	5	203590	189160	165320	901090	1698500	823690	0.307	0.285	0.249	1.358	2.56	1.241	chloroplast
RchiOBHm_Chr6g0251781	"Putative heavy metal-associated domain, HMA"	0.615	Down	0.02636	---	40.5	16.972	15	4	4	3	3	3	3	2	1	4	4	4	3	3	4	4	4	4	3	3	4	190580	176550	219710	130400	139060	91538	1.206	1.118	1.391	0.825	0.88	0.579	chloroplast	GO:0006810 transport; GO:0051179 localization; GO:0006812 cation transport; GO:0030001 metal ion transport; GO:0006811 ion transport; GO:0051234 establishment of localization;		GO:0046872 metal ion binding; GO:0043169 cation binding; GO:0005488 binding; GO:0043167 ion binding;				IPR006121;	Heavy metal-associated domain, HMA;
RchiOBHm_Chr6g0251951	"Putative aminoacyltransferase, E1 ubiquitin-activating enzyme"	0.527	Down	0.0099973	---	11.4	205.07	44	17	16	9	13	8	4	6	4	16	17	15	14	12	12	15	16	14	13	11	11	513910	513460	436590	194450	285440	291490	1.379	1.378	1.172	0.522	0.766	0.782	nucleus			GO:0005515 protein binding; GO:0019787 ubiquitin-like protein transferase activity; GO:0003824 catalytic activity; GO:0016740 transferase activity; GO:0005488 binding; GO:0004842 ubiquitin-protein transferase activity;	K10590	TRIP12; E3 ubiquitin-protein ligase TRIP12 [EC:2.3.2.26]	mdm04120 Ubiquitin mediated proteolysis - Malus domestica (apple);	IPR011989; IPR016024; IPR000569;	Armadillo-like helical; Armadillo-type fold; HECT domain;
RchiOBHm_Chr6g0253531	Putative transcription factor C2H2 family	0.6	Down	0.0011595	---	14.4	39.444	18	3	3	2	4	3	3	3	3	2	3	3	3	3	3	2	3	3	3	3	3	171240	192720	158460	100440	108710	104370	1.229	1.383	1.137	0.721	0.78	0.749	chloroplast
RchiOBHm_Chr6g0253651	"Putative EGF-like calcium-binding domain, PA domain, peptidase S1A, coagulation factor VII/IX/X/C/Z"	0.379	Down	0.00084498	---	47.5	69.545	95	21	21	21	18	21	12	12	11	20	20	18	15	17	14	20	20	18	15	17	14	1807200	1490600	1755100	637440	737190	539120	1.556	1.284	1.512	0.549	0.635	0.464	Golgi apparatus			GO:0043169 cation binding; GO:0046872 metal ion binding; GO:0005509 calcium ion binding; GO:0005488 binding; GO:0043167 ion binding;				IPR003137; IPR026823; IPR001881; IPR012336;	PA domain; Complement Clr-like EGF domain; EGF-like calcium-binding domain; Thioredoxin-like fold;
RchiOBHm_Chr6g0254181	Putative 3-oxo-5-beta-steroid 4-dehydrogenase	0.664	Down	0.00040294	---	45	43.82	50	13	5	9	7	9	11	5	9	10	10	8	12	12	11	4	5	4	5	5	4	1519800	1601800	1561200	1095500	973290	1040300	1.17	1.233	1.202	0.844	0.749	0.801	cytoplasm			GO:0048037 cofactor binding; GO:0003824 catalytic activity; GO:0005488 binding; GO:0050662 coenzyme binding;	K22419			IPR001509; IPR016040;	NAD-dependent epimerase/dehydratase; NAD(P)-binding domain;
RchiOBHm_Chr6g0255681	Putative arylformamidase	0.464	Down	0.042078	---	28.6	30.645	15	5	4	2	4	1	2	3	3	5	5	3	3	4	4	4	4	2	2	3	3	176450	191810	0	57897	97212	101150	1.413	1.536		0.464	0.778	0.81	cytoplasm	GO:1901606 alpha-amino acid catabolic process; GO:0006725 cellular aromatic compound metabolic process; GO:0044699 single-organism process; GO:0044237 cellular metabolic process; GO:0071704 organic substance metabolic process; GO:0006576 cellular biogenic amine metabolic process; GO:0044270 cellular nitrogen compound catabolic process; GO:0008152 metabolic process; GO:0006520 cellular amino acid …		GO:0016787 hydrolase activity; GO:0016811 hydrolase activity, acting on carbon-nitrogen (but not peptide) bonds, in linear amides; GO:0004061 arylformamidase activity; GO:0003824 catalytic activity; GO:0016810 hydrolase activity, acting on carbon-nitrogen (but not peptide) bonds;
RchiOBHm_Chr6g0258511	plant/F17M5-140 protein [Medicago truncatula]	0.562	Down	0.0047219	---	20.3	21.594	10	2	2	2	2	2	1	1	2	2	2	2	2	1	2	2	2	2	2	1	2	70127	59848	70822	36212	0	38998	1.27	1.084	1.283	0.656		0.706	chloroplast
RchiOBHm_Chr6g0254951	Cinnamate beta-D-glucosyltransferase	2.049	Up	0.0034184	---	19.9	61.219	19	9	9	3	2	2	4	4	4	9	9	6	9	9	8	9	9	6	9	9	8	162570	135010	133680	272470	352600	259080	0.742	0.616	0.61	1.243	1.608	1.182	chloroplast	GO:0008152 metabolic process;		GO:0016757 transferase activity, transferring glycosyl groups; GO:0016758 transferase activity, transferring hexosyl groups; GO:0003824 catalytic activity; GO:0016740 transferase activity;
RchiOBHm_Chr6g0259041	Putative peptidylprolyl isomerase	0.503	Down	0.020864	---	13.5	40.292	9	3	3	3	1	2	1	2	0	3	2	2	3	3	2	3	2	2	3	3	2	107570	69901	92509	41264	57939	36693	1.59	1.033	1.368	0.61	0.857	0.542	cytoplasm	GO:0044267 cellular protein metabolic process; GO:0044238 primary metabolic process; GO:0018208 peptidyl-proline modification; GO:0000413 protein peptidyl-prolyl isomerization; GO:0044237 cellular metabolic process; GO:0071704 organic substance metabolic process; GO:0006457 protein folding; GO:0018193 peptidyl-amino acid modification; GO:0008152 metabolic process; GO:0044260 cellular macromolecul…		GO:0003755 peptidyl-prolyl cis-trans isomerase activity; GO:0005515 protein binding; GO:0016853 isomerase activity; GO:0003824 catalytic activity; GO:0016859 cis-trans isomerase activity; GO:0005488 binding;	K05864	PPID, CYPD; peptidyl-prolyl isomerase D [EC:5.2.1.8]		IPR002130; IPR011990; IPR029000; IPR013026;	Cyclophilin-type peptidyl-prolyl cis-trans isomerase domain; Tetratricopeptide-like helical domain; Cyclophilin-like domain; Tetratricopeptide repeat-containing domain;
[truncated: 190 more rows]

## Sheet: down-ubi-down-protein
Protein accession	Protein description	stage5/stage3 Ratio	Regulated Type	stage5/stage3 P value	Gene name	Sequence coverage [%]	Mol. weight [kDa]	MS/MS Counts	Peptides	Unique peptides	MS/MS Count S3_1	MS/MS Count S3_2	MS/MS Count S3_3	MS/MS Count S5_1	MS/MS Count S5_2	MS/MS Count S5_3	Peptides S3_1	Peptides S3_2	Peptides S3_3	Peptides S5_1	Peptides S5_2	Peptides S5_3	Unique peptides S3_1	Unique peptides S3_2	Unique peptides S3_3	Unique peptides S5_1	Unique peptides S5_2	Unique peptides S5_3	LFQ intensity S3_1	LFQ intensity S3_2	LFQ intensity S3_3	LFQ intensity S5_1	LFQ intensity S5_2	LFQ intensity S5_3	S3_1	S3_2	S3_3	S5_1	S5_2	S5_3	Subcellular localization	Biological Process	Cellular Component	Molecular Function	KEGG KO No.	KEGG Gene	KEGG pathway	IPR ID	Domain description
[truncated: 5 more rows]

[truncated: 3 more sheets: down-ubi-up-protein, up-ubi-up-protein, up-ubi-down-protein]
