# Supplementary material for: Integrative analysis of transcriptome, proteome, and ubiquitome changes during rose petal abscission
Source: Front Plant Sci. 2022 Oct 19;13:1041141. doi: 10.3389/fpls.2022.1041141 (PMC9627506; doi:10.3389/fpls.2022.1041141)
Supplement: Supplementary Table 7 — DEGs and DEPs related to the phenylpropanoid biosynthesis pathway. [file DataSheet_7.xlsx]

## Sheet: Sheet1
		transcrpt				protein
	#ID	S3 FPKM	S5 FPKM	S5/S3 ratio	regulated	S3	S5	S5/S3 ratio	regulated	NR_annotation
PAL	RchiOBHmChr3g0469861.gene	1.52259	5.81212	3.81726	up					phenylalanine ammonia-lyase 1
4CL	RchiOBHm_Chr5g0057621	0.663	1.29	1.9457	up	0.628	1.372	2.18471	up	4-coumarate--CoA ligase [EC:6.2.1.12]
	RchiOBHmChr6g0304091.gene	27.4488	68.6885	2.50242	up					4-coumarate--CoA ligase-like 5
PC3H	RchiOBHmChr3g0494961.gene	6.1765	20.9502	3.39193	up	0.792667	1.20733	1.52313	up	p-coumarate 3-hydroxylase P450
	RchiOBHm_Chr1g0333181					1.362	0.637667	0.468184	down	unsaturated fatty acid epoxidase
	RchiOBHm_Chr5g0018521	5.49723	40.5016	7.36763	up	1.41667	0.583333	0.411765	down	beta-amyrin 28-monooxygenase
	RchiOBHm_Chr7g0199091	0.203	2.068	10.1872	up	0.273	1.72733	6.32723	up	Putative cytochrome P450
	RchiOBHmChr5g0028701.gene	0.676441	1.95263	2.88663	up					cytochrome P450 72A15-like
	RchiOBHmChr5g0028671.gene	0.928069	4.99866	5.38608	up					cytochrome P450 72A15-like
	RchiOBHmChr5g0028751.gene	3.68009	12.4172	3.37415	up					cytochrome P450 72A15-like
	RchiOBHmChr5g0028621.gene	1.88816	16.5611	8.77103	up					cytochrome P450 72A15-like
COMT	RchiOBHmChr1g0317931.gene	0.40673	8.48787	20.8686	up					caffeic acid 3-O-methyltransferase-like
	RchiOBHmChr6g0296031.gene	25.5515	87.8349	3.43756	up	1.09133	0.908333	0.832315	down	caffeic acid 3-O-methyltransferase
CCR	RchiOBHmChr2g0172231.gene	0.328211	3.2817	9.99875	up					cinnamoyl-CoA reductase 2
	RchiOBHmChr1g0317691.gene	1.13136	6.42791	5.68158	up					cinnamoyl-CoA reductase 1-like
	RchiOBHmChr1g0316841.gene	0.152854	2.19812	14.3805	up					cinnamoyl-CoA reductase 1-like]
	RchiOBHmChr1g0317371.gene	0.754481	2.45995	3.26045	up					cinnamoyl-CoA reductase 1-like
	RchiOBHm_Chr2g0133081	0.797	1.471	1.84567	up	0.68	1.32	1.94118	up	cinnamoyl-CoA reductase
CAD	RchiOBHmChr7g0188031.gene	1.56361	4.29054	2.74399	up					cinnamyl alcohol dehydrogenase 1
POD	RchiOBHmChr1g0371621.gene	21.8138	138.762	6.36119	up	0.163	1.279	7.84663	up	peroxidase P7-like
	RchiOBHmChr2g0098631.gene	4.35875	17.9801	4.12506	up	0	1		up	peroxidase 64
	RchiOBHmChr2g0107511.gene	0.50682	2.46771	4.869	up					peroxidase 73
	RchiOBHmChr5g0003181.gene	85.8919	625.466	7.28201	up	0.477667	1.52267	3.18772	up	peroxidase 42
	RchiOBHmChr5g0053991.gene	0.398436	3.72758	9.35553	up					peroxidase A2-like
	RchiOBHmChr2g0130331.gene	2.34637	6.99382	2.9807	up					peroxidase P7-like
	RchiOBHmChr5g0072371.gene	2.86614	117.719	41.0724	up	0.891667	1.10833	1.24299	up	peroxidase 4-like
	RchiOBHmChr5g0080741.gene	2.1196	8.44679	3.98509	up					peroxidase N
	RchiOBHmChr5g0080751.gene	0.828763	4.50272	5.43306	up	0.05	1.317	26.34	up	peroxidase 15
	RchiOBHmChr5g0080801.gene	0.94396	9.37342	9.9299	up					peroxidase A2
	RchiOBHmChr5g0080821.gene	0.225649	1.8649	8.26461	up					peroxidase A2-like
	RchiOBHmChr5g0080961.gene	0.038999	1.24908	32.0284	up					peroxidase A2
	RchiOBHmChr3g0461001.gene	3.01463	15.8097	5.24434	up					peroxidase 1-like
	RchiOBHm_Chr4g0400821	0.46	1.143	2.48478	up	0.588	1.412	2.40136	up	E1.11.1.7; peroxidase
	RchiOBHm_Chr5g0034661	0.641	1.205	1.87988	up	0.751667	1.24867	1.6612	up	E1.11.1.7; peroxidase
	RchiOBHmChr5g0003181.gene	84.4602	625.466	7.40545	up	0.477667	1.52267	3.18772	up	peroxidase 42
	RchiOBHmChr5g0080861.gene	1.2844	8.10997	6.31423	up					peroxidase 15
HCT	RchiOBHmChr5g0066761.gene	1.82639	5.71665	3.13003	up	0.621	1.37933	2.22115	up	shikimate O-hydroxycinnamoyltransferase-like
	RchiOBHmChr2g0132651.gene	0.280994	0.734119	2.61258	up					shikimate O-hydroxycinnamoyltransferase-like
	RchiOBHmChr5g0081061.gene	1.48314	7.86074	5.30008	up					shikimate O-hydroxycinnamoyltransferase-like
	RchiOBHm_Chr5g0066721	0.598	1.47	2.45819	up	0.566667	1.43333	2.52941	up	shikimate O-hydroxycinnamoyltransferase
UGT	RchiOBHmChr5g0073601.gene	0.958756	0.105005	0.109522	down					UDP-glycosyltransferase 72E1-like
	RchiOBHmChr5g0073611.gene	1.3453	0.114273	0.0849423	down					UDP-glycosyltransferase 72E1-like
	RchiOBHmChr2g0084841.gene	5.66844	0.228606	0.0403296	down					UDP-glycosyltransferase 74E1-like
	RchiOBHmChr5g0067011.gene	1.96275	0.662653	0.337615	down					UDP-glycosyltransferase 76E2-like
	RchiOBHmChr4g0409581.gene	29.6314	10.7224	0.36186	down					UDP-glycosyltransferase 74E1-like
	RchiOBHmChr5g0073611.gene	1.3453	0.145354	0.108046	down					UDP-glycosyltransferase 72E1-like
	RchiOBHmChr7g0183861.gene	3.32106	1.86622	0.561935	down					UDP-glycosyltransferase 89B1
BGLU	RchiOBHmChr5g0071491.gene	682.836	157.537	0.230709	down					beta-glucosidase
	RchiOBHmChr5g0077961.gene	476.572	136.005	0.285383	down	0.105667	1.89433	17.9274	up	beta-glucosidase
	RchiOBHmChr5g0077971.gene	19.4364	7.77797	0.400176	down					beta-glucosidase 13-like
	RchiOBHm_Chr5g0041231	0.654	1.46	2.23242	up	0.695667	1.304	1.87446	up	beta-glucosidase
	RchiOBHmChr5g0036981.gene	3.19228	1.79957	0.563724	down					beta-glucosidase 41
	RchiOBHmChr2g0174811.gene	1.55832	0.241052	0.154687	down					beta-glucosidase 24-like
	RchiOBHmChr5g0049481.gene	5.47572	24.7422	4.51852	up	1.2	0.799667	0.666389	down	beta-glucosidase
	RchiOBHmChr1g0313711.gene	4.76793	0.417697	0.0876055	down					beta-glucosidase
	RchiOBHmChr1g0313741.gene	32.8679	12.476	0.379579	down					beta-glucosidase
	RchiOBHmChr5g0014251.gene	8.85203	1.25013	0.141225	down					glucan endo-1,3-beta-glucosidase 11
	RchiOBHmChr5g0028861.gene	1.57753	17.7149	11.2295	up					glucan endo-1,3-beta-glucosidase
	RchiOBHmChr4g0424631.gene	55.1376	30.213	0.547956	down	0.833333	1.16667	1.4	up	glucan endo-1,3-beta-glucosidase, basic isoform
	RchiOBHmChr1g0369251.gene	20.0587	0.177961	0.008872	down	1.00033	0.999667	0.999334		glucan endo-1,3-beta-glucosidase 2, partial
	RchiOBHmChr3g0458371.gene	11.9548	5.23721	0.438082	down					glucan endo-1,3-beta-glucosidase 3-like
	RchiOBHmChr4g0426131.gene	35.6385	19.8637	0.557365	down	1.004	0.996333	0.992364		beta-glucosidase-like SFR2, chloroplastic
	RchiOBHmChr2g0135631.gene	1.13587	0.291547	0.256672	down	1	0	0	down	glucan endo-1,3-beta-glucosidase 14
	RchiOBHmChr2g0096501.gene	0.957561	0.24597	0.256871	down	1.054	0.946	0.897533	down	glucan endo-1,3-beta-glucosidase 6
	RchiOBHmChr2g0092181.gene	2.64289	9.17744	3.4725	up	1.174	0.826333	0.703861	down	glucan endo-1,3-beta-glucosidase 13
COAD	RchiOBHmChr2g0090721.gene	0.979004	0.068566	0.0700365	down	1.298	0.702	0.540832	down	coniferyl-aldehyde dehydrogenase
