# Supplementary material for: Integrative analysis of transcriptome, proteome, and ubiquitome changes during rose petal abscission
Source: Front Plant Sci. 2022 Oct 19;13:1041141. doi: 10.3389/fpls.2022.1041141 (PMC9627506; doi:10.3389/fpls.2022.1041141)
Supplement: Supplementary Table 8 — Differentially expressed transcription factors in transcriptome, proteome, and ubiquitome. [file DataSheet_8.xlsx]

## Sheet: transciptome
#ID	S3-1_FPKM	S3-2_FPKM	S3-3_FPKM	S5-1_FPKM	S5-2_FPKM	S5-3_FPKM	FDR	log2FC	regulated	NR_annotation
RchiOBHmChr3g0470831.gene	7.31747	7.31856	4.75368	2.55342	3.43216	3.9361	0.00049388	-1.24752	down	PREDICTED: zinc finger protein ZAT5-like [Fragaria vesca subsp. vesca]	zinc finger
RchiOBHmChr2g0099771.gene	32.3719	37.4617	35.2866	4.54021	4.92947	4.54214	2.18e-40	-3.19464	down	PREDICTED: B-box zinc finger protein 19-like [Fragaria vesca subsp. vesca]	zinc finger
RchiOBHmChr4g0406441.gene	21.9314	27.1298	29.4262	13.3949	12.78	11.9111	4.59e-08	-1.33135	down	B-box zinc finger protein 24-like [Prunus avium]	zinc finger
RchiOBHmChr4g0426381.gene	0.103827	0.273141	0.136683	1.49759	1.12607	0.95229	8.04e-06	2.41397	up	PREDICTED: zinc finger BED domain-containing protein RICESLEEPER 1-like [Fragaria vesca subsp. vesca]	zinc finger
RchiOBHmChr5g0062181.gene	124.25	124.334	117.429	49.2192	63.5592	84.687	1.61e-09	-1.17186	down	PREDICTED: zinc finger protein CONSTANS-LIKE 1 isoform X1 [Fragaria vesca subsp. vesca]	zinc finger
RchiOBHmChr5g0008861.gene	1.8215	1.44292	1.45721	0.849673	0	0.921624	0.000359861	-1.70894	down	PREDICTED: dof zinc finger protein DOF1.4 [Fragaria vesca subsp. vesca]	zinc finger
RchiOBHmChr6g0300001.gene	2.83162	3.87965	3.27251	21.916	19.1613	16.5079	9.4e-16	2.2357	up	PREDICTED: dof zinc finger protein DOF1.6 [Fragaria vesca subsp. vesca]	zinc finger
RchiOBHmChr3g0447961.gene	32.4766	33.8373	34.1831	23.3779	16.9462	20.1261	1.85e-06	-1.02409	down	PREDICTED: zinc finger CCCH domain-containing protein ZFN-like [Fragaria vesca subsp. vesca]	zinc finger
RchiOBHmChr1g0380881.gene	13.8042	10.9124	9.22685	44.263	47.3556	29.5865	6.89e-07	1.5439	up	PREDICTED: zinc finger protein CONSTANS-LIKE 1 [Fragaria vesca subsp. vesca]	zinc finger
RchiOBHmChr4g0434821.gene	3.91164	3.87138	2.07908	17.4942	14.5432	19.6716	1.49e-11	2.09477	up	PREDICTED: zinc finger protein 6 [Fragaria vesca subsp. vesca]	zinc finger
RchiOBHmChr5g0071321.gene	1.19716	1.23844	0.622599	6.13926	6.28336	3.30165	0.000114377	2.05451	up	PREDICTED: zinc finger protein CONSTANS-LIKE 7 [Fragaria vesca subsp. vesca]	zinc finger
RchiOBHmChr3g0458031.gene	5.65689	5.46731	5.39415	3.02422	2.4895	3.09978	0.00363374	-1.26598	down	PREDICTED: zinc finger CCCH domain-containing protein 3 [Fragaria vesca subsp. vesca]	zinc finger
RchiOBHmChr4g0443241.gene	0.371968	0.272571	0.598395	1.66969	1.53094	1.58306	0.00139855	1.64379	up	PREDICTED: zinc finger protein VAR3, chloroplastic [Fragaria vesca subsp. vesca]	zinc finger
RchiOBHmChr6g0267001.gene	0.754523	0.680806	0.6895	10.0921	9.88406	9.27294	9.28e-20	3.47541	up	PREDICTED: B-box zinc finger protein 20-like [Fragaria vesca subsp. vesca]	zinc finger
RchiOBHmChr2g0161131.gene	6.58035	8.62044	8.66043	0.566454	1.61373	0.693462	4.33e-22	-3.32139	down	PREDICTED: zinc finger protein CONSTANS-LIKE 9-like [Fragaria vesca subsp. vesca]	zinc finger
RchiOBHmChr2g0103751.gene	0.626978	0.595605	0.521201	7.91107	7.0024	6.59493	1.81e-15	3.33153	up	PREDICTED: dof zinc finger protein DOF3.4 [Fragaria vesca subsp. vesca]	zinc finger
RchiOBHmChr4g0396691.gene	0.647572	0.57342	0.623678	3.74777	2.58365	2.54916	4.79e-08	2.00496	up	PREDICTED: GATA zinc finger domain-containing protein 5-like isoform X3 [Fragaria vesca subsp. vesca]	zinc finger
RchiOBHmChr1g0382921.gene	0.815287	0.058162	0.116402	4.13684	2.89362	4.86641	8.11e-10	3.25958	up	PREDICTED: RING-H2 zinc finger protein RHA4a-like [Fragaria vesca subsp. vesca]	zinc finger
RchiOBHmChr4g0434191.gene	27.2989	26.889	30.9641	11.0153	9.98773	9.03233	1.51e-20	-1.97853	down	PREDICTED: zinc finger protein CONSTANS-LIKE 15-like isoform X1 [Fragaria vesca subsp. vesca]	zinc finger
RchiOBHmChr4g0435741.gene	12.3918	14.5587	15.2574	1.09322	1.45519	0.856362	6.66e-31	-3.91164	down	PREDICTED: zinc finger protein WIP6 [Fragaria vesca subsp. vesca]	zinc finger
RchiOBHmChr7g0203441.gene	1.9637	1.87299	1.46737	5.10099	5.51302	5.61681	0.000589617	1.32451	up	PREDICTED: zinc finger protein ZAT4 [Fragaria vesca subsp. vesca]	zinc finger
RchiOBHmChr2g0089141.gene	2.35002	2.45645	1.69078	6.09309	5.08579	5.59331	0.00358849	1.0984	up	PREDICTED: zinc finger CCCH domain-containing protein 39 [Fragaria vesca subsp. vesca]	zinc finger
RchiOBHmChr1g0356851.gene	100.195	115.478	125.985	17.6912	22.5945	23.5021	1.22e-41	-2.70693	down	PREDICTED: RING-H2 zinc finger protein RHA1a [Fragaria vesca subsp. vesca]	zinc finger
RchiOBHmChr5g0031651.gene	3.29696	2.67494	2.91155	14.6379	15.5995	10.4405	3.72e-07	1.89606	up	Zinc finger, CCHC-type [Parasponia andersonii]	zinc finger
RchiOBHmChr4g0434201.gene	1.38074	1.00345	1.04255	0.483496	0.392481	0.236238	0.00017047	-1.9446	down	PREDICTED: putative zinc finger protein At1g68190 isoform X1 [Fragaria vesca subsp. vesca]	zinc finger
RchiOBHmChr4g0434181.gene	96.8536	85.109	70.903	13.3328	9.81392	4.20529	1.47e-35	-3.52992	down	PREDICTED: zinc finger protein CONSTANS-LIKE 15-like isoform X1 [Fragaria vesca subsp. vesca]	zinc finger
RchiOBHmChr1g0362171.gene	17.8729	20.1308	18.8964	1.62919	1.73547	3.68925	2.33e-36	-3.29552	down	PREDICTED: zinc finger protein ZAT5-like [Fragaria vesca subsp. vesca]	zinc finger
RchiOBHmChr7g0178341.gene	1.92911	1.80216	2.04892	9.04583	8.3399	8.01327	3.93e-08	1.8461	up	PREDICTED: zinc finger protein VAR3, chloroplastic [Fragaria vesca subsp. vesca]	zinc finger
RchiOBHmChr4g0403841.gene	168.571	205.548	195.504	48.3213	106.884	103.784	3.2e-09	-1.419	down	PREDICTED: zinc finger protein CONSTANS-LIKE 5 [Fragaria vesca subsp. vesca]	zinc finger
RchiOBHmChr5g0053281.gene	0.637615	0.711153	0.610802	11.9406	7.05205	4.93946	0.000275967	3.11336	up	PREDICTED: zinc finger CCCH domain-containing protein 46-like [Fragaria vesca subsp. vesca]	zinc finger
RchiOBHmChr5g0056681.gene	122.693	110.514	126.869	24.1458	31.313	53.5428	5.31e-25	-2.01009	down	PREDICTED: zinc finger protein ZAT5-like [Fragaria vesca subsp. vesca]	zinc finger
Rosa_chinensis_newGene_2954	0.019229	0.104217	0.205377	1.68629	1.00228	1.37824	1.07e-07	3.24578	up	zinc finger BED domain-containing protein RICESLEEPER 2 [Prunus persica]	zinc finger
RchiOBHmChr1g0348921.gene	7.79996	9.97267	9.62309	1.64247	2.65004	2.87915	4.21e-12	-2.21311	down	PREDICTED: zinc finger protein ZAT9 [Fragaria vesca subsp. vesca]	zinc finger
RchiOBHmChr2g0146551.gene	0.235326	0.099459	0.149168	0.710108	1.45615	1.08393	0.000163804	2.16285	up	PREDICTED: zinc finger CCCH domain-containing protein 62-like [Fragaria vesca subsp. vesca]	zinc finger
RchiOBHmChr7g0181371.gene	7.97414	5.85099	6.77681	1.43074	1.70738	2.01283	8.01e-07	-2.269	down	mini zinc finger protein 3-like isoform X1 [Durio zibethinus]	zinc finger
RchiOBHmChr4g0435191.gene	13.042	8.84782	7.9712	28.4481	35.6331	25.3176	1.81e-05	1.2987	up	PREDICTED: zinc finger protein CONSTANS-LIKE 16 [Fragaria vesca subsp. vesca]	zinc finger
RchiOBHmChr4g0439861.gene	0.441416	0.715331	0.425442	3.85499	2.78688	3.85239	4.19e-09	2.41867	up	PREDICTED: zinc-finger homeodomain protein 11-like [Fragaria vesca subsp. vesca]	zinc finger
RchiOBHmChr6g0276721.gene	4.98956	6.06741	6.65134	0.288753	1.25927	0.740228	1.36e-14	-3.20731	down	ZnF-Dof-type transcription factor [Fragaria x ananassa]	zinc finger
RchiOBHmChr7g0177751.gene	0.548863	0.562646	0.275195	2.7223	2.20259	2.29117	6.62e-05	2.07116	up	PREDICTED: zinc-finger homeodomain protein 10-like [Fragaria vesca subsp. vesca]	zinc finger
RchiOBHmChr6g0288541.gene	4.65653	5.45438	5.92534	13.9893	13.8245	13.9067	3.84e-06	1.08904	up	PREDICTED: transcription factor bHLH155-like [Fragaria vesca subsp. vesca]	bHLH
RchiOBHmChr4g0399211.gene	1.52751	0.608297	1.34766	50.3104	41.801	14.369	3.02e-05	4.62551	up	PREDICTED: transcription factor bHLH35 [Fragaria vesca subsp. vesca]	bHLH
RchiOBHmChr4g0405961.gene	23.2076	22.9029	18.9483	79.5616	65.0822	58.8984	1.59e-10	1.35542	up	PREDICTED: transcription factor bHLH113 [Fragaria vesca subsp. vesca]	bHLH
RchiOBHmChr6g0310101.gene	3.80614	2.93296	2.67097	15.0433	11.0473	9.80166	1.39e-07	1.64086	up	PREDICTED: transcription factor bHLH74 [Fragaria vesca subsp. vesca]	bHLH
RchiOBHmChr7g0189021.gene	5.81253	5.83288	4.74866	13.3607	13.5722	15.9776	0.000102585	1.09291	up	PREDICTED: transcription factor bHLH137 [Fragaria vesca subsp. vesca]	bHLH
RchiOBHmChr6g0291401.gene	1.52626	1.10539	1.10531	5.42701	6.28581	6.18953	3.92e-07	1.97506	up	PREDICTED: transcription factor bHLH69 [Fragaria vesca subsp. vesca]	bHLH
RchiOBHmChr3g0480751.gene	44.6647	47.6974	46.2088	23.977	19.6413	16.8892	1.04e-12	-1.49086	down	PREDICTED: transcription factor bHLH48 [Fragaria vesca subsp. vesca]	bHLH
RchiOBHmChr1g0370561.gene	14.1991	12.859	12.7269	34.354	30.5716	33.8509	2.57e-05	1.02273	up	PREDICTED: transcription factor bHLH51 [Fragaria vesca subsp. vesca]	bHLH
RchiOBHmChr2g0126861.gene	0.044876	0.31629	0.573402	3.82176	2.34118	1.90706	0.000133448	2.67696	up	PREDICTED: transcription factor bHLH118-like isoform X2 [Fragaria vesca subsp. vesca]	bHLH
RchiOBHmChr4g0445091.gene	358.745	317.298	334.792	137.812	163.016	121.828	1.9e-14	-1.54255	down	PREDICTED: transcription factor bHLH79 isoform X1 [Fragaria vesca subsp. vesca]	bHLH
RchiOBHmChr4g0425781.gene	255.506	291.28	288.16	151.845	146.971	162.908	1.3e-08	-1.14329	down	PREDICTED: transcription factor bHLH147 [Prunus mume]	bHLH
RchiOBHmChr2g0112221.gene	0.10686	0	0	7.72214	5.22546	7.087	2.45e-36	7.05997	up	PREDICTED: transcription factor bHLH94-like [Fragaria vesca subsp. vesca]	bHLH
RchiOBHmChr4g0434901.gene	1.02222	1.27297	0.603764	8.34687	6.93207	4.99167	3.73e-08	2.49576	up	PREDICTED: transcription factor bHLH75 isoform X1 [Fragaria vesca subsp. vesca]	bHLH
RchiOBHmChr2g0109941.gene	1.27279	0.984025	0.943198	15.531	11.3124	19.2071	3.84e-15	3.54955	up	PREDICTED: transcription factor bHLH93-like [Fragaria vesca subsp. vesca]	bHLH
RchiOBHmChr5g0036871.gene	3.56022	4.1326	5.20227	25.3094	27.1544	14.2326	5.07e-05	2.08339	up	PREDICTED: transcription factor bHLH123-like [Fragaria vesca subsp. vesca]	bHLH
RchiOBHmChr7g0238141.gene	14.5204	18.5282	17.0608	5.52816	4.56855	4.72643	2.34e-14	-2.04564	down	PREDICTED: transcription factor bHLH96 [Fragaria vesca subsp. vesca]	bHLH
RchiOBHmChr6g0283511.gene	5.30911	5.07605	4.94089	22.7087	18.7786	37.6442	0.000555355	2.07271	up	PREDICTED: transcription factor bHLH62 [Fragaria vesca subsp. vesca]	bHLH
RchiOBHmChr4g0444191.gene	44.3569	42.3386	43.634	4.49083	5.14715	3.74908	9.4e-38	-3.56628	down	transcription factor PAR1 [Prunus avium]	bHLH
RchiOBHmChr7g0183781.gene	41.5165	46.7367	53.0784	26.7866	14.3779	35.3392	4.2e-05	-1.17923	down	PREDICTED: transcription factor BIM1 [Fragaria vesca subsp. vesca]	bHLH
RchiOBHmChr6g0308251.gene	0.196271	0.17862	0.078244	4.44053	4.03794	4.42992	6.44e-19	4.40019	up	PREDICTED: transcription factor SPATULA-like [Fragaria vesca subsp. vesca]	bHLH
RchiOBHmChr3g0451111.gene	9.80237	7.16968	6.37434	27.2716	26.4776	29.2975	7.48e-11	1.51267	up	PREDICTED: transcription factor UNE12 isoform X2 [Fragaria vesca subsp. vesca]	bHLH
RchiOBHmChr7g0185551.gene	52.5612	27.4245	24.4007	137.636	151.796	209.812	3.9e-07	1.973	up	PREDICTED: transcription factor BEE 3 [Fragaria vesca subsp. vesca]	bHLH
RchiOBHmChr4g0440111.gene	58.4547	61.252	112.276	14.1201	14.7093	28.0659	0.000486482	-2.31515	down	PREDICTED: transcription factor PRE6-like [Prunus mume]	bHLH
RchiOBHmChr2g0168811.gene	93.8184	103.809	120.218	27.187	21.3552	29.984	6.46e-30	-2.30698	down	PREDICTED: transcription factor PRE6-like [Fragaria vesca subsp. vesca]	bHLH
RchiOBHmChr5g0004791.gene	10.7782	9.32252	8.79129	1.76012	1.96946	1.82095	1.7e-12	-2.65696	down	PREDICTED: transcription factor DYSFUNCTIONAL TAPETUM 1 [Fragaria vesca subsp. vesca]	bHLH
RchiOBHmChr6g0307001.gene	1.44613	2.28024	1.59856	11.8906	6.06131	6.08201	0.00329122	1.86802	up	putative MYB transcription factor [Rosa hybrid cultivar]	MYB
RchiOBHmChr7g0184661.gene	3.05758	2.91068	2.99945	6.98477	7.07598	8.81813	0.00305791	1.0609	up	putative MYB transcription factor [Rosa hybrid cultivar]	MYB
RchiOBHmChr4g0426181.gene	2.76682	3.0408	1.88443	23.0066	15.4314	25.3748	1.43e-12	2.75449	up	putative MYB transcription factor [Rosa rugosa]	MYB
RchiOBHmChr6g0311771.gene	3.08808	2.7087	3.65609	0.283292	0.349573	0.097173	3.05e-13	-3.81399	down	putative MYB transcription factor [Rosa rugosa]	MYB
RchiOBHmChr1g0354061.gene	3.50293	2.67506	2.09945	21.4828	21.1182	34.2184	9.32e-09	2.93124	up	putative MYB transcription factor [Rosa hybrid cultivar]	MYB
RchiOBHmChr7g0212961.gene	4.1105	4.98957	5.06353	1.72338	2.1742	2.52161	0.000124828	-1.42796	down	PREDICTED: myb family transcription factor APL [Fragaria vesca subsp. vesca]	MYB
RchiOBHmChr7g0178691.gene	4.37497	4.79799	5.18796	1.62981	1.27067	2.26964	2.54e-05	-1.76	down	PREDICTED: transcription factor MYB3-like [Fragaria vesca subsp. vesca]	MYB
RchiOBHmChr6g0311741.gene	4.82795	5.59626	5.78624	0.338549	0.866492	0.222818	2.91e-15	-3.73004	down	putative MYB transcription factor [Rosa rugosa]	MYB
RchiOBHmChr7g0185561.gene	1.63553	1.19029	1.10181	19.4068	16.0844	28.673	3.47e-11	3.72543	up	PREDICTED: transcription factor MYB108-like [Fragaria vesca subsp. vesca]	MYB
RchiOBHmChr4g0415391.gene	7.06229	8.13041	4.81933	18.0202	21.2952	18.0704	4.66e-06	1.22985	up	putative MYB transcription factor [Rosa rugosa]	MYB
RchiOBHmChr7g0187141.gene	0.976818	0.592978	0.669458	14.2796	16.2016	10.9453	2.53e-24	3.88947	up	PREDICTED: transcription factor MYC2-like isoform X1 [Prunus mume]	MYB
RchiOBHmChr2g0094451.gene	0.065955	0	0.104893	2.27259	1.68893	1.12409	1.48e-09	4.30241	up	PREDICTED: transcription factor WER-like [Fragaria vesca subsp. vesca]	MYB
RchiOBHmChr2g0145221.gene	2.08826	0.992334	1.04671	5.78791	5.67512	3.40929	0.000600024	1.55362	up	PREDICTED: transcription factor WER-like [Fragaria vesca subsp. vesca]	MYB
RchiOBHmChr2g0152151.gene	0.435276	0.558436	0.34468	1.43695	1.54442	2.02439	0.00426979	1.59956	up	PREDICTED: transcription factor WER-like [Fragaria vesca subsp. vesca]	MYB
RchiOBHmChr2g0145191.gene	11.9649	12.2207	11.1667	26.0084	34.9547	31.9963	4.61e-06	1.10949	up	PREDICTED: transcription factor TT2-like [Fragaria vesca subsp. vesca]	MYB
RchiOBHmChr6g0311681.gene	0.494606	0.484716	0.303895	7.03132	6.10379	6.30275	9.51e-16	3.61362	up	PREDICTED: transcription factor TT2-like [Fragaria vesca subsp. vesca]	MYB
RchiOBHmChr2g0159921.gene	9.24309	5.91797	7.45112	19.2353	21.1757	17.0631	0.000281116	1.12843	up	PREDICTED: transcription factor CPC-like [Fragaria vesca subsp. vesca]	MYB
RchiOBHmChr2g0092281.gene	2.92014	3.11116	2.9235	2.19151	1.14498	2.24116	0.00965982	-1.01722	down	PREDICTED: myb-like protein Q isoform X4 [Fragaria vesca subsp. vesca]	MYB
RchiOBHmChr5g0020711.gene	1.29411	0.54047	0.678133	12.8137	10.9029	4.84937	7.88e-05	3.19473	up	PREDICTED: myb-like protein P [Fragaria vesca subsp. vesca]	MYB
RchiOBHmChr7g0228621.gene	473.933	485.188	469.174	184.918	229.252	270.92	2.31e-11	-1.34618	down	PREDICTED: transcription repressor MYB6 [Fragaria vesca subsp. vesca]	MYB
RchiOBHmChr4g0439571.gene	10.8863	11.3734	8.82833	2.32576	2.41416	1.69759	2.44e-17	-2.55501	down	PREDICTED: myb-like protein Q [Fragaria vesca subsp. vesca]	MYB
RchiOBHmChr6g0252211.gene	277.745	284.915	291.135	53.857	58.6446	66.5731	1.34e-37	-2.5403	down	R2R3-MYB [Rosa hybrid cultivar]	MYB
RchiOBHmChr4g0441081.gene	103.558	105.911	112.512	55.203	55.7081	72.3675	2.21e-08	-1.10109	down	PREDICTED: transcription repressor MYB6-like [Fragaria vesca subsp. vesca]	MYB
RchiOBHmChr4g0415391.gene	7.06229	8.13041	4.81933	18.0202	21.2952	18.0704	4.66e-06	1.22985	up	putative MYB transcription factor [Rosa rugosa]	MYB
RchiOBHmChr5g0008971.gene	4.81155	4.60275	2.74944	28.9298	26.4933	23.7348	2e-17	2.41039	up	PREDICTED: ethylene-responsive transcription factor 12 [Fragaria vesca subsp. vesca]	ERF
RchiOBHmChr2g0139661.gene	0.813531	1.23062	0.659532	9.59936	13.9276	8.79099	1.18e-10	3.28248	up	PREDICTED: ethylene-responsive transcription factor TINY [Fragaria vesca subsp. vesca]	ERF
RchiOBHmChr4g0435261.gene	12.5167	12.6997	12.8366	35.8572	30.5351	30.0891	1.48e-06	1.05297	up	PREDICTED: ethylene-responsive transcription factor ERF118 [Fragaria vesca subsp. vesca]	ERF
RchiOBHmChr6g0310091.gene	1.1735	0.940483	0.873431	46.0349	33.8608	26.2708	3.44e-19	4.8304	up	PREDICTED: AP2-like ethylene-responsive transcription factor ANT [Fragaria vesca subsp. vesca]	ERF
RchiOBHmChr1g0376651.gene	0.45006	0.514522	0.30245	2.72092	3.42533	2.8839	2.66e-07	2.5304	up	PREDICTED: ethylene-responsive transcription factor ERF027 [Fragaria vesca subsp. vesca]	ERF
RchiOBHmChr1g0360021.gene	19.6093	18.4399	18.626	8.61925	12.5152	10.2022	0.000209551	-1.13687	down	PREDICTED: ethylene-responsive transcription factor ERF023 [Fragaria vesca subsp. vesca]	ERF
RchiOBHmChr6g0295481.gene	2.78284	1.27041	1.14314	19.4712	8.12949	10.6958	0.00106197	2.58361	up	PREDICTED: ethylene-responsive transcription factor ERF014 [Fragaria vesca subsp. vesca]	ERF
RchiOBHmChr2g0111031.gene	0.132396	0.116462	0.175644	2.54775	2.01571	0.887448	0.000150556	3.34391	up	PREDICTED: AP2-like ethylene-responsive transcription factor AIL6 [Fragaria vesca subsp. vesca]	ERF
RchiOBHmChr4g0415231.gene	3.25022	1.93906	2.67516	0.488203	1.03686	1.9066	0.00170038	-1.47002	down	PREDICTED: ethylene-responsive transcription factor ERF062 [Fragaria vesca subsp. vesca]	ERF
RchiOBHmChr6g0299771.gene	17.5772	15.0152	12.2857	79.8941	33.9433	82.1896	0.00403288	1.83152	up	PREDICTED: ethylene-responsive transcription factor ERF003-like [Fragaria vesca subsp. vesca]	ERF
RchiOBHmChr2g0132251.gene	0.19795	0.182521	0.033233	0.86853	1.17309	0.870234	6.11e-05	2.38029	up	PREDICTED: AP2-like ethylene-responsive transcription factor At1g16060 [Fragaria vesca subsp. vesca]	ERF
RchiOBHmChr3g0482661.gene	5.86752	6.13365	5.80773	16.982	16.9084	13.793	1.21e-05	1.123	up	PREDICTED: AP2-like ethylene-responsive transcription factor At2g41710 [Fragaria vesca subsp. vesca]	ERF
RchiOBHmChr6g0288231.gene	0.57743	0.397537	0.132086	6.05617	5.14422	8.74156	1.14e-12	3.80808	up	PREDICTED: ethylene-responsive transcription factor 1B [Fragaria vesca subsp. vesca]	ERF
RchiOBHmChr1g0364341.gene	7.23304	7.36597	9.12439	3.08102	4.60271	5.98816	0.000468061	-1.07588	down	PREDICTED: ethylene-responsive transcription factor RAP2-7-like isoform X1 [Fragaria vesca subsp. vesca]	ERF
RchiOBHmChr6g0289271.gene	4.34003	3.64754	3.6856	17.178	12.8045	9.36262	0.000319961	1.46044	up	PREDICTED: ethylene-responsive transcription factor 9-like [Fragaria vesca subsp. vesca]	ERF
RchiOBHmChr1g0346421.gene	1.55247	2.07518	1.2289	11.5263	10.0011	7.09177	1.62e-09	2.25873	up	PREDICTED: ethylene-responsive transcription factor ERF034-like [Fragaria vesca subsp. vesca]	ERF
RchiOBHmChr2g0135921.gene	10.1562	15.552	18.6947	0.334197	1.34549	0.748833	2.69e-14	-4.44746	down	PREDICTED: LOW QUALITY PROTEIN: ethylene-responsive transcription factor WIN1-like [Fragaria vesca subsp. vesca]	ERF
RchiOBHmChr7g0188681.gene	5.61426	4.21601	3.53278	14.6785	14.215	20.8574	1.46e-06	1.60506	up	PREDICTED: ethylene-responsive transcription factor ERF113-like [Fragaria vesca subsp. vesca]	ERF
RchiOBHmChr3g0468481.gene	0.793353	0.821704	0.564015	3.81945	2.85234	4.24968	4.56e-06	1.95131	up	PREDICTED: AP2-like ethylene-responsive transcription factor TOE3 [Fragaria vesca subsp. vesca]	ERF
RchiOBHmChr7g0231631.gene	0	0	0	21.7703	5.72979	2.38578	0.00198014	Inf	up	PREDICTED: ethylene-responsive transcription factor ERF021 [Fragaria vesca subsp. vesca]	ERF
RchiOBHmChr4g0392501.gene	0.088486	0.04713	0.188332	2.18579	5.61676	3.9682	3.46e-06	4.68508	up	PREDICTED: ethylene-responsive transcription factor 1B [Fragaria vesca subsp. vesca]	ERF
RchiOBHmChr1g0373621.gene	6.53322	5.26524	3.96062	18.337	16.1092	13.4744	2.3e-05	1.31466	up	PREDICTED: ethylene-responsive transcription factor 2-like [Fragaria vesca subsp. vesca]	ERF
RchiOBHmChr4g0440141.gene	108.183	90.4045	101.401	61.9426	54.4744	45.0671	3.98e-09	-1.17505	down	PREDICTED: homeobox-leucine zipper protein ATHB-13 [Fragaria vesca subsp. vesca]	HB
RchiOBHmChr1g0382431.gene	17.8819	12.1013	11.9589	132.4	84.094	98.7891	1.6e-13	2.6411	up	homeobox-leucine zipper protein 2 [Rosa hybrid cultivar]	HB
RchiOBHmChr1g0352671.gene	12.0154	10.9144	10.9092	26.8697	25.0967	34.5126	1.7e-05	1.0639	up	PREDICTED: homeobox-leucine zipper protein ANTHOCYANINLESS 2 isoform X1 [Fragaria vesca subsp. vesca]	HB
RchiOBHmChr2g0097121.gene	4.12927	3.59687	2.82666	17.8463	18.2059	15.8772	3.42e-12	2.04003	up	PREDICTED: WUSCHEL-related homeobox 8 [Fragaria vesca subsp. vesca]	HB
RchiOBHmChr7g0204271.gene	66.4154	57.2036	56.1408	24.857	34.3364	40.6704	1.01e-08	-1.13238	down	PREDICTED: homeobox-leucine zipper protein HAT4-like [Fragaria vesca subsp. vesca]	HB
RchiOBHmChr3g0479361.gene	2.00796	1.48729	2.16788	11.7823	13.2003	11.0069	5.47e-14	2.37791	up	PREDICTED: homeobox-leucine zipper protein HOX11 [Fragaria vesca subsp. vesca]	HB
RchiOBHmChr6g0310291.gene	44.9723	55.011	55.4092	23.1704	29.3302	27.7852	2.83e-08	-1.22671	down	PREDICTED: homeobox-leucine zipper protein HOX19-like [Fragaria vesca subsp. vesca]	HB
RchiOBHmChr2g0158421.gene	1.26246	1.06775	1.21373	0.407078	0.377544	0.487613	0.00110749	-1.76299	down	homeobox protein SBH1-like [Fragaria vesca]	HB
RchiOBHmChr4g0441321.gene	0.628967	0.456225	0.153872	2.05427	1.26751	1.56308	0.00305286	1.65479	up	PREDICTED: homeobox-leucine zipper protein HOX3 [Fragaria vesca subsp. vesca]	HB
RchiOBHmChr6g0297211.gene	33.5757	36.2931	28.1959	79.8082	85.9618	82.0796	3.52e-07	1.02572	up	PREDICTED: homeobox protein knotted-1-like 3 isoform X1 [Fragaria vesca subsp. vesca]	HB
RchiOBHmChr2g0086661.gene	21.3603	15.301	15.5438	68.1251	78.4712	59.6546	1.24e-12	1.64281	up	PREDICTED: homeobox protein knotted-1-like 3 isoform X1 [Fragaria vesca subsp. vesca]	HB
RchiOBHmChr7g0193251.gene	20.1874	21.7728	22.261	14.6789	11.0572	11.3027	9.17e-06	-1.08164	down	homeobox protein knotted-1-like 6-like [Fragaria vesca]	HB
RchiOBHmChr1g0376881.gene	1.28408	0.764541	0.399165	2.74349	2.42386	2.3821	0.00180772	1.28035	up	PREDICTED: homeobox-leucine zipper protein HDG1 isoform X1 [Fragaria vesca subsp. vesca]	HB
RchiOBHmChr2g0168851.gene	72.9902	85.0798	95.9011	11.0312	10.438	11.1376	2.28e-42	-3.25016	down	PREDICTED: homeobox-leucine zipper protein ATHB-20-like [Fragaria vesca subsp. vesca]	HB
RchiOBHmChr4g0440751.gene	4.8334	3.60341	2.96132	12.9245	13.3094	16.204	1.32e-08	1.61489	up	PREDICTED: homeobox-leucine zipper protein HAT5 [Fragaria vesca subsp. vesca]	HB
RchiOBHmChr6g0310231.gene	0	0	0	1.26929	0.859485	1.41055	6.08e-16	Inf	up	PREDICTED: transcription factor RAX3-like [Fragaria vesca subsp. vesca]	HB
RchiOBHmChr3g0470381.gene	0.235984	0.249641	0.066311	1.01171	0.844243	1.00953	0.00087105	1.93459	up	PREDICTED: transcription factor RAX2 [Fragaria vesca subsp. vesca]	HB
RchiOBHmChr5g0013131.gene	4.86162	2.959	1.36926	37.0844	36.5441	46.9418	1.04e-37	3.42495	up	PREDICTED: probable WRKY transcription factor 71 [Fragaria vesca subsp. vesca]	WRKY
RchiOBHmChr2g0151681.gene	1.76012	1.23561	1.41918	18.1826	14.9754	21.1292	1.66e-32	3.32481	up	PREDICTED: probable WRKY transcription factor 71 [Fragaria vesca subsp. vesca]	WRKY
RchiOBHmChr6g0308491.gene	4.52809	5.1321	5.14698	19.6392	11.3248	13.2108	0.000684596	1.29433	up	PREDICTED: probable WRKY transcription factor 7 [Fragaria vesca subsp. vesca]	WRKY
RchiOBHmChr5g0083891.gene	5.23272	5.39761	6.20188	1.40973	2.14382	2.81326	0.000235137	-1.68467	down	PREDICTED: probable WRKY transcription factor 58 [Fragaria vesca subsp. vesca]	WRKY
RchiOBHmChr5g0002561.gene	14.0862	12.5001	12.3842	61.1219	41.349	46.9749	1.42e-10	1.64766	up	PREDICTED: probable WRKY transcription factor 31 [Fragaria vesca subsp. vesca]	WRKY
RchiOBHmChr7g0196571.gene	0.107718	0.099184	0.329512	7.51263	4.7165	5.15201	2.65e-18	4.51588	up	PREDICTED: probable WRKY transcription factor 29 isoform X1 [Fragaria vesca subsp. vesca]	WRKY
RchiOBHmChr3g0485711.gene	0.079918	0	0	2.41392	1.3142	1.91958	2.34e-17	5.46799	up	PREDICTED: probable WRKY transcription factor 47 isoform X2 [Fragaria vesca subsp. vesca]	WRKY
RchiOBHmChr2g0133001.gene	9.74798	7.65955	4.81833	120.356	82.395	83.6354	2.84e-20	3.39612	up	PREDICTED: probable WRKY transcription factor 40 [Fragaria vesca subsp. vesca]	WRKY
RchiOBHmChr1g0372441.gene	6.14709	4.17799	4.63368	23.4602	17.8382	14.1862	5.26e-06	1.60079	up	PREDICTED: probable WRKY transcription factor 70 [Fragaria vesca subsp. vesca]	WRKY
RchiOBHmChr2g0158801.gene	0.222215	0.275608	0.296365	4.60329	2.25852	2.02952	0.000264372	3.14053	up	PREDICTED: probable WRKY transcription factor 31 [Fragaria vesca subsp. vesca]	WRKY
RchiOBHmChr6g0299501.gene	2.36654	0.957235	0.588103	32.0228	15.8001	8.25761	0.00510221	3.57297	up	PREDICTED: probable WRKY transcription factor 40 isoform X2 [Fragaria vesca subsp. vesca]	WRKY
RchiOBHmChr4g0425801.gene	5.25496	2.9511	3.58329	21.0234	17.8204	16.2061	1.15e-12	1.9346	up	PREDICTED: probable WRKY transcription factor 48 [Fragaria vesca subsp. vesca]	WRKY
RchiOBHmChr3g0450591.gene	2.19511	2.19108	1.54936	10.8546	10.9549	8.27553	5.51e-10	2.04879	up	PREDICTED: probable WRKY transcription factor 74 [Fragaria vesca subsp. vesca]	WRKY
RchiOBHmChr2g0106361.gene	30.9226	33.6817	29.6418	107.838	93.7228	88.0592	1.44e-11	1.33025	up	probable WRKY transcription factor 7 [Prunus avium]	WRKY
RchiOBHmChr2g0107651.gene	21.1521	19.9739	24.1626	5.46587	6.25968	10.3526	1.02e-18	-1.85099	down	PREDICTED: BTB/POZ domain-containing protein NPY4-like [Fragaria vesca subsp. vesca]	BTB/POZ
RchiOBHmChr2g0107471.gene	172.994	197.364	168.073	88.0815	86.9786	79.5715	6.98e-12	-1.37605	down	PREDICTED: BTB/POZ domain-containing protein At5g67385 isoform X1 [Fragaria vesca subsp. vesca]	BTB/POZ
RchiOBHmChr5g0061841.gene	11.4933	12.1959	11.7992	6.21396	6.82435	5.22284	0.000947386	-1.24157	down	PREDICTED: BTB/POZ domain-containing protein At5g60050 [Fragaria vesca subsp. vesca]	BTB/POZ
RchiOBHmChr6g0304381.gene	27.5514	29.2075	29.543	22.1332	16.3112	13.1511	1.86e-06	-1.01329	down	PREDICTED: BTB/POZ domain-containing protein At2g30600 [Fragaria vesca subsp. vesca]	BTB/POZ
RchiOBHmChr5g0061851.gene	41.3509	43.4999	41.4372	18.8109	21.7168	21.6441	6.98e-10	-1.30901	down	PREDICTED: BTB/POZ domain-containing protein At5g60050 [Fragaria vesca subsp. vesca]	BTB/POZ
RchiOBHmChr6g0292951.gene	84.57	100.063	78.4034	26.9799	38.2093	31.7209	1.79e-18	-1.69801	down	PREDICTED: BTB/POZ domain-containing protein At1g03010 isoform X1 [Fragaria vesca subsp. vesca]	BTB/POZ
RchiOBHmChr4g0433101.gene	18.1467	15.651	15.4786	9.2858	8.40382	8.91997	3.38e-07	-1.15625	down	PREDICTED: BTB/POZ domain-containing protein At1g67900 [Fragaria vesca subsp. vesca]	BTB/POZ
RchiOBHmChr3g0460071.gene	3.29945	2.76744	2.51817	15.4783	14.2901	14.2115	9.35e-16	2.08845	up	PREDICTED: BTB/POZ domain-containing protein At3g08570 [Fragaria vesca subsp. vesca]	BTB/POZ
RchiOBHmChr2g0137311.gene	13.0185	6.04511	8.78654	2.27532	5.07621	3.96443	0.00708419	-1.5763	down	PREDICTED: auxin-induced protein IAA6 [Fragaria vesca subsp. vesca]	Aux/IAA
RchiOBHmChr4g0389621.gene	235.415	172.808	180.668	95.9318	107.268	131.209	1.76e-06	-1.10205	down	PREDICTED: auxin-responsive protein IAA14-like [Fragaria vesca subsp. vesca]	Aux/IAA
RchiOBHmChr3g0451081.gene	159.909	115.179	140.055	34.8334	50.5566	46.0759	1.22e-16	-1.94137	down	PREDICTED: auxin-responsive protein IAA4-like [Fragaria vesca subsp. vesca]	Aux/IAA
RchiOBHmChr2g0137321.gene	7.3851	4.36215	5.47892	1.77715	3.31722	2.78945	0.00500988	-1.39028	down	PREDICTED: auxin-induced protein IAA6 [Fragaria vesca subsp. vesca]	Aux/IAA
RchiOBHmChr2g0089801.gene	12.9873	12.185	14.8269	0.952123	1.47174	3.42227	7.8e-19	-2.99986	down	PREDICTED: auxin-responsive protein IAA1-like [Fragaria vesca subsp. vesca]	Aux/IAA
RchiOBHmChr7g0233101.gene	52.1292	59.426	66.0146	37.5921	35.7208	33.6814	4.71e-07	-1.01916	down	PREDICTED: auxin-responsive protein IAA8-like isoform X1 [Fragaria vesca subsp. vesca]	Aux/IAA
RchiOBHmChr6g0286601.gene	8.283	7.78126	7.56609	2.24001	3.44173	3.42982	3.77e-07	-1.6525	down	PREDICTED: auxin-responsive protein IAA11-like isoform X1 [Fragaria vesca subsp. vesca]	Aux/IAA
RchiOBHmChr4g0436911.gene	15.6325	19.166	17.826	6.09764	6.58999	11.254	7.57e-07	-1.42352	down	PREDICTED: basic leucine zipper 43 [Fragaria vesca subsp. vesca]	bzip
RchiOBHmChr6g0305501.gene	6.39082	6.71807	7.70102	3.26371	4.62923	4.48982	0.00369267	-1.03497	down	PREDICTED: basic leucine zipper 9 [Fragaria vesca subsp. vesca]	bzip
RchiOBHmChr2g0128811.gene	3.88779	2.04236	3.39143	1.01049	0.591646	0.740606	5.19e-06	-2.27551	down	PREDICTED: basic leucine zipper 34 [Fragaria vesca subsp. vesca]	bzip
RchiOBHmChr5g0031811.gene	13.4499	11.0312	11.4484	2.69497	2.31223	3.56887	1.44e-18	-2.35336	down	PREDICTED: basic leucine zipper 61-like isoform X2 [Prunus mume]	bzip
RchiOBHmChr4g0428031.gene	3.07625	1.73327	2.20076	8.10797	10.6348	15.2227	0.0001661	1.96866	up	PREDICTED: transcription factor HY5-like isoform X3 [Fragaria vesca subsp. vesca]	bzip
RchiOBHmChr5g0044421.gene	2.4531	2.10847	1.93372	1.35194	1.22596	0.827477	0.00912079	-1.16834	down	PREDICTED: transcription factor TGA6 isoform X3 [Fragaria vesca subsp. vesca]	bzip
RchiOBHmChr5g0073151.gene	27.7359	31.6614	36.1917	13.103	7.76519	13.8571	5.61e-15	-1.7535	down	PREDICTED: transcription factor RF2b-like [Fragaria vesca subsp. vesca]	bzip
RchiOBHmChr4g0387751.gene	23.2953	19.2081	20.5062	8.67999	11.4808	10.0731	1.06e-08	-1.34332	down	PREDICTED: heat stress transcription factor A-6b [Fragaria vesca subsp. vesca]	HSF
RchiOBHmChr2g0093671.gene	0.350633	0.215783	0.157346	2.40195	2.60169	1.8209	1.59e-09	2.94303	up	PREDICTED: heat stress transcription factor A-2-like [Fragaria vesca subsp. vesca]	HSF
RchiOBHmChr2g0090441.gene	15.5146	16.517	13.9304	7.75993	11.955	7.7113	0.000330911	-1.02739	down	PREDICTED: heat stress transcription factor C-1 [Fragaria vesca subsp. vesca]	HSF
RchiOBHmChr4g0387751.gene	23.2953	19.2081	20.5062	8.67999	11.4808	10.0731	1.06e-08	-1.34332	down	PREDICTED: heat stress transcription factor A-6b [Fragaria vesca subsp. vesca]	HSF
RchiOBHmChr2g0093671.gene	0.350633	0.215783	0.157346	2.40195	2.60169	1.8209	1.59e-09	2.94303	up	PREDICTED: heat stress transcription factor A-2-like [Fragaria vesca subsp. vesca]	HSF
RchiOBHmChr2g0090441.gene	15.5146	16.517	13.9304	7.75993	11.955	7.7113	0.000330911	-1.02739	down	PREDICTED: heat stress transcription factor C-1 [Fragaria vesca subsp. vesca]	HSF
RchiOBHmChr3g0462911.gene	1.01056	0.377827	0.711976	4.12893	2.77967	2.12789	0.000724543	1.79943	up	PREDICTED: trihelix transcription factor GT-3b [Fragaria vesca subsp. vesca]	trihelix
RchiOBHmChr4g0428941.gene	6.26352	4.80383	5.41289	26.4513	27.6269	21.0999	4.91e-14	1.90327	up	PREDICTED: trihelix transcription factor GT-2 [Fragaria vesca subsp. vesca]	trihelix
RchiOBHmChr6g0311751.gene	0.166117	0.164955	0.069771	0.989888	1.16272	0.882976	3.99e-06	2.57885	up	PREDICTED: trihelix transcription factor GT-2-like [Fragaria vesca subsp. vesca]	trihelix
RchiOBHmChr7g0188161.gene	90.0754	92.4441	104.828	46.4988	32.4529	42.384	1.29e-14	-1.53916	down	PREDICTED: trihelix transcription factor GTL1 isoform X1 [Fragaria vesca subsp. vesca]	trihelix
RchiOBHmChr3g0462911.gene	1.01056	0.377827	0.711976	4.12893	2.77967	2.12789	0.000724543	1.79943	up	PREDICTED: trihelix transcription factor GT-3b [Fragaria vesca subsp. vesca]	trihelix
RchiOBHmChr1g0361661.gene	1.80351	1.76627	2.11931	14.0065	8.88308	5.92363	0.000538184	2.03282	up	PREDICTED: NAC domain-containing protein 74-like [Fragaria vesca subsp. vesca]	NAC
RchiOBHmChr1g0324721.gene	0.32822	0.060374	0.289852	1.40699	1.66284	0.824958	0.000262986	2.03391	up	PREDICTED: NAC domain-containing protein 74-like isoform X2 [Fragaria vesca subsp. vesca]	NAC
RchiOBHmChr6g0274751.gene	1.36469	1.48846	1.69298	5.0455	2.82332	5.38743	0.00321205	1.24482	up	PREDICTED: NAC domain-containing protein 78-like [Fragaria vesca subsp. vesca]	NAC
RchiOBHmChr2g0167461.gene	7.40128	6.4811	6.83422	41.3567	41.1397	67.1503	3.04e-07	2.56117	up	NAC domain protein 100 [Rosa hybrid cultivar]	NAC
RchiOBHmChr2g0122871.gene	11.6912	11.6966	9.43162	42.3675	39.8499	37.0778	3.41e-12	1.57335	up	Function unknown	putative NAC-4 protein [Rosa chinensis]
RchiOBHmChr4g0424251.gene	8.71098	9.46815	8.93191	25.3438	29.0337	23.8764	2.89e-06	1.23955	up	PREDICTED: GATA transcription factor 15-like [Fragaria vesca subsp. vesca]	GATA
RchiOBHmChr2g0140091.gene	43.4581	62.5079	52.8565	33.185	22.346	28.0051	4.33e-06	-1.23204	down	PREDICTED: GATA transcription factor 9-like [Fragaria vesca subsp. vesca]	GATA
RchiOBHmChr4g0396691.gene	0.647572	0.57342	0.623678	3.74777	2.58365	2.54916	4.79e-08	2.00496	up	PREDICTED: GATA zinc finger domain-containing protein 5-like isoform X3 [Fragaria vesca subsp. vesca]	GATA
RchiOBHmChr6g0306441.gene	19.9292	23.5051	27.6027	6.22774	5.52408	8.22319	2.12e-10	-2.11638	down	PREDICTED: GATA transcription factor 12 [Fragaria vesca subsp. vesca]	GATA
RchiOBHmChr4g0407481.gene	3.55224	3.31858	3.40826	10.8706	10.3891	11.8066	8.66e-08	1.39341	up	PREDICTED: probable helicase MAGATAMA 3 isoform X1 [Fragaria vesca subsp. vesca]	GATA
RchiOBHmChr6g0296731.gene	153.159	152.448	175.975	75.1996	87.1413	86.6694	1.94e-10	-1.24538	down	MADS-box protein [Rosa rugosa]	MADS
RchiOBHmChr2g0151031.gene	84.6791	107.036	108.915	25.0947	21.3885	24.6025	4.16e-27	-2.37609	down	MADS-box protein [Rosa rugosa]	MADS
RchiOBHmChr7g0236811.gene	0.672652	1.18657	1.09155	0.155419	0.34198	0.013094	4.74e-07	-2.77164	down	PREDICTED: MADS-box protein AGL24 [Fragaria vesca subsp. vesca]	MADS
RchiOBHmChr4g0445441.gene	2.16573	2.29543	1.96991	1.02447	0.905009	0.825241	0.00808268	-1.49072	down	PREDICTED: agamous-like MADS-box protein AGL62 [Fragaria vesca subsp. vesca]	MADS
RchiOBHmChr6g0296721.gene	61.6291	66.0635	81.7363	40.05	41.8714	42.9942	5.13e-07	-1.03294	down	PREDICTED: floral homeotic protein PMADS 2-like [Fragaria vesca subsp. vesca]	MADS
RchiOBHmChr7g0186081.gene	79.974	86.2441	85.8126	33.0714	31.8414	35.9191	1.45e-16	-1.61015	down	PREDICTED: auxin response factor 9 isoform X1 [Fragaria vesca subsp. vesca]	ARF
RchiOBHmChr2g0095551.gene	143.127	162.06	166.817	57.6187	55.4358	58.609	1.32e-17	-1.74775	down	PREDICTED: auxin response factor 19-like [Fragaria vesca subsp. vesca]	ARF
RchiOBHmChr5g0058761.gene	12.2326	12.226	11.8741	4.35159	4.63066	4.65912	5.51e-12	-1.69289	down	PREDICTED: auxin response factor 18-like [Fragaria vesca subsp. vesca]	ARF
RchiOBHmChr5g0037031.gene	9.91962	7.88109	8.94923	21.2422	25.3508	29.2867	7.04e-08	1.21883	up	PREDICTED: scarecrow-like protein 21 [Fragaria vesca subsp. vesca]	SCL
RchiOBHmChr2g0101761.gene	6.92432	6.37353	6.80296	19.2487	19.6321	21.0624	5.69e-08	1.2883	up	PREDICTED: scarecrow-like protein 4 [Fragaria vesca subsp. vesca]	SCL
RchiOBHmChr5g0065671.gene	0.651381	0.381554	0.49171	2.08704	2.4849	3.57801	5.74e-06	2.11172	up	PREDICTED: scarecrow-like protein 11 [Fragaria vesca subsp. vesca]	SCL
RchiOBHmChr6g0264521.gene	0.063141	0.061298	0.062064	2.51334	1.99282	2.11992	9.51e-12	4.63862	up	PREDICTED: transcription factor RADIALIS-like [Fragaria vesca subsp. vesca]	RADIALIS
RchiOBHmChr6g0301221.gene	10.2496	7.61573	7.84373	3.07848	4.64808	3.67068	0.000329639	-1.45127	down	PREDICTED: protein RADIALIS-like 5 [Fragaria vesca subsp. vesca]	RADIALIS
RchiOBHmChr2g0101281.gene	35.9674	34.6562	31.4767	11.796	11.6184	6.22216	2.09e-10	-2.06664	down	PREDICTED: protein RADIALIS-like 4 [Fragaria vesca subsp. vesca]	RADIALIS
RchiOBHmChr5g0007171.gene	11.2797	12.008	13.3881	7.35433	6.67931	6.60593	0.000113737	-1.11771	down	PREDICTED: katanin p80 WD40 repeat-containing subunit B1 homolog isoform X2 [Fragaria vesca subsp. vesca]	WD40
RchiOBHmChr5g0007421.gene	12.3567	13.2535	15.2208	6.94323	6.58534	6.5969	9.49e-09	-1.30877	down	PREDICTED: katanin p80 WD40 repeat-containing subunit B1 homolog isoform X1 [Fragaria vesca subsp. vesca]	WD40
RchiOBHmChr5g0037341.gene	0.36121	0.551512	0.67866	2.71239	4.79922	2.47629	0.000952973	2.35572	up	PREDICTED: E2F transcription factor-like E2FE [Fragaria vesca subsp. vesca]	E2F
RchiOBHmChr6g0302711.gene	28.423	27.2508	24.0432	5.54452	8.92846	4.01634	4.88e-24	-2.38095	down	PREDICTED: transcription factor E2FC isoform X1 [Fragaria vesca subsp. vesca]	E2F
RchiOBHmChr2g0094231.gene	6.04828	5.60023	4.98815	16.7464	13.6619	13.8104	4.6e-05	1.12082	up	PREDICTED: nuclear transcription factor Y subunit A-3-like isoform X1 [Fragaria vesca subsp. vesca]	NFY
RchiOBHmChr3g0476401.gene	1.85884	2.2889	2.17241	1.68853	0.172108	0.634562	0.00107696	-1.63352	down	PREDICTED: nuclear transcription factor Y subunit A-10-like [Fragaria vesca subsp. vesca]	NFY
RchiOBHmChr3g0454311.gene	287.255	293.988	274.919	104.916	107.731	105.558	2.64e-19	-1.79845	down	PREDICTED: nuclear transcription factor Y subunit C-9 [Fragaria vesca subsp. vesca]	NFY
RchiOBHmChr2g0128901.gene	30.9997	24.9155	27.2229	15.0162	13.5707	18.8338	1.78e-07	-1.09806	down	PREDICTED: transcription factor TCP4-like [Fragaria vesca subsp. vesca]	TCP
RchiOBHmChr3g0470021.gene	4.09067	5.57016	4.43399	17.8281	20.6643	17.854	3.58e-10	1.71044	up	PREDICTED: transcription factor PCF1 [Fragaria vesca subsp. vesca]	TCP
RchiOBHmChr2g0127161.gene	17.5252	19.0981	16.3555	7.10184	5.61372	4.63582	9.48e-15	-1.90006	down	PREDICTED: probable transcription factor GLK1 isoform X2 [Fragaria vesca subsp. vesca]	GLK1

## Sheet: proteome
Protein accession	stage5/stage3 Ratio	Regulated Type	stage5/stage3 P value	S3_1	S3_2	S3_3	S5_1	S5_2	S5_3	KEGG Gene	Protein description	TF
RchiOBHm_Chr1g0336731	2.081	Up	0.0186975	0.777	0.461	0.709	1.66	1.177	1.215	PREB, SEC12; prolactin regulatory element-binding protein	Putative transcription factor WD40-like family	WD40
RchiOBHm_Chr1g0360111	0.568	Down	0.023561	1.209	1.38	1.238	0.517	0.878	0.778		Putative transcription factor WD40-like family	WD40
RchiOBHm_Chr2g0097641	1.808	Up	0.00055829	0.666	0.742	0.729	1.288	1.396	1.18		Putative strictosidine synthase transcription factor WD40-like family	WD40
RchiOBHm_Chr2g0165901	1.914	Up	0.00113561	0.788	0.633	0.638	1.35	1.232	1.358	YTM1, WDR12; ribosome biogenesis protein YTM1	Putative transcription factor WD40-like family	WD40
RchiOBHm_Chr3g0448281	0.629	Down	0.0043246	1.228	1.184	1.272	0.811	0.847	0.658	EIF3B; translation initiation factor 3 subunit B	Putative transcription factor WD40-like family	WD40
RchiOBHm_Chr3g0463911	0.471	Down	0.0015443	1.255	1.457	1.367	0.691	0.532	0.698		Putative transcription factor WD40-like family	WD40
RchiOBHm_Chr3g0480691	0.46	Down	0.027556	1.095	1.165	1.85	0.596	0.818	0.476		Putative transcription factor WD40-like family	WD40
RchiOBHm_Chr3g0484331	0.648	Down	0.00133572	1.226	1.168	1.246	0.811	0.839	0.71	PRPF4, PRP4; U4/U6 small nuclear ribonucleoprotein PRP4	Putative transcription factor WD40-like family	WD40
RchiOBHm_Chr4g0397311	1.991	Up	9.6875e-05	0.635	0.719	0.652	1.285	1.323	1.385	UTP21, WDR36; U3 small nucleolar RNA-associated protein 21	Putative transcription factor WD40-like family	WD40
RchiOBHm_Chr4g0443891	0.333	Down	0.0029584	1.727	1.371	1.403	0.472	0.649	0.378	CDC40, PRP17; pre-mRNA-processing factor 17	Putative transcription factor WD40-like family	WD40
RchiOBHm_Chr6g0286091	0.578	Down	0.00177505	1.192	1.259	1.351	0.773	0.784	0.641		Putative transcription factor WD40-like family	WD40
RchiOBHm_Chr6g0299541	0.662	Down	0.028083	1.153	1.222	1.236	0.631	0.784	0.974	TAF5; transcription initiation factor TFIID subunit 5	Putative transcription factor WD40-like family	WD40
RchiOBHm_Chr7g0237521	0.411	Down	0.044481	0.876	1.7	1.348		0.499	0.576	WDTC1; WD and tetratricopeptide repeats protein 1	Putative transcription factor WD40-like family	WD40
RchiOBHm_Chr1g0331941	0.593	Down	0.0024842	1.249	1.171	1.347	0.734	0.835	0.664	SF3A3, SAP61, PRP9; splicing factor 3A subunit 3	Putative transcription factor C2H2 family	zinc finger
RchiOBHm_Chr2g0157941	0.53	Down	0.00034284	1.376	1.28	1.266	0.763	0.662	0.653		Putative transcription factor C3H family	zinc finger
RchiOBHm_Chr4g0412531	0.644	Down	0.0054166	1.202	1.369	1.079	0.775	0.842	0.732		Putative transcription factor C2H2 family	zinc finger
RchiOBHm_Chr5g0014771	0.627	Down	0.0187994	1.243	1.448	0.997	0.694	0.818	0.8		"Putative Zinc finger, C3HC"	zinc finger
RchiOBHm_Chr6g0244251	0.591	Down	0.00146135	1.283	1.326	1.162	0.734	0.818	0.677		Putative transcription factor interactor and regulator CCHC(Zn) family	zinc finger
RchiOBHm_Chr5g0059081	3.512	Up	0.0083411	0.49	0.274	0.566	1.201	1.497	1.973		"zinc finger, C3HC4 type family protein, putative [Medicago truncatula]"	zinc finger
RchiOBHm_Chr7g0216321	0.524	Down	0.00091933	1.244	1.395	1.298	0.605	0.757	0.701		zinc finger/BTB domain protein [Arabidopsis thaliana]	zinc finger
RchiOBHm_Chr2g0124891	2.235	Up	0.0049647	0.706	0.676	0.473	1.541	1.208	1.396	NPR1; regulatory protein NPR1	PREDICTED: BTB/POZ domain-containing protein At5g60050 [Fragaria vesca subsp. vesca]	BTB
RchiOBHm_Chr5g0061851	2.498	Up	0.0037381	0.612	0.423	0.68	1.448	1.549	1.287		PREDICTED: BTB/POZ domain-containing protein At5g60050 [Fragaria vesca subsp. vesca]	BTB
RchiOBHm_Chr5g0073591	0.207	Down	0.0031431	1.668	1.494	1.809	0.415	0.197	0.419		PREDICTED: BTB/POZ domain-containing protein At5g60050 [Fragaria vesca subsp. vesca]	BTB
RchiOBHm_Chr7g0216321	0.524	Down	0.00091933	1.244	1.395	1.298	0.605	0.757	0.701		BTB domain protein [Arabidopsis thaliana]	BTB
RchiOBHm_Chr2g0138001	0.513	Down	0.032125	1.306	1.014	1.647	0.489	0.742	0.803		BZIP protein [Medicago truncatula]	bZIP
RchiOBHm_Chr2g0157441	0.551	Down	0.0137754	1.438	1.34	1.09	0.72	0.846	0.565		Putative transcription factor bZIP family	bZIP
RchiOBHm_Chr2g0113351	0.594	Down	0.0177027	1.351	1.285	1.129	0.639	0.652	0.944	CAMTA; calmodulin-binding transcription activator	Putative transcription factor CG1-CAMTA family	CAMTA
RchiOBHm_Chr4g0429961	0.42	Down	0.0021768	1.57	1.278	1.377	0.472	0.677	0.625	CAMTA; calmodulin-binding transcription activator	Putative transcription factor CG1-CAMTA family	CAMTA
RchiOBHm_Chr7g0180121	0.318	Down	0.00158262	1.713	1.509	1.328	0.409	0.422	0.618		Putative transcription factor bHLH family	Bhlh
RchiOBHm_Chr2g0172331	0.401	Down	0.0060176	1.796	1.306	1.181	0.71	0.489	0.519	MYBP; transcription factor MYB, plant	Putative transcription factor MYB-HB-like family	MYB
RchiOBHm_Chr7g0199751	4.857	Up	0.00025755	0.335	0.348			1.686	1.631		Putative transcription factor Homobox-WOX family	HB
RchiOBHm_Chr3g0487771	0.433	Down	0.00059546	1.331	1.355	1.5	0.67	0.518	0.624		Putative AUX/IAA domain family	Aux/IAA
RchiOBHm_Chr7g0187871	0.335	Down	0.0054039	1.902	1.538	1.053	0.466	0.597	0.444		Putative transcription factor NAC family	NAC

## Sheet: ubiquitome
Protein accession	Position	stage5/stage3 Ratio	Regulated Type	stage5/stage3 P value	Amino acid	Protein description	Gene name	Localization probability	PEP	Score	Modified sequence	Charge	Mass error [ppm]	MS/MS Count	S3_1	S3_2	S3_3	S5_1	S5_2	S5_3	KEGG Gene
RchiOBHm_Chr2g0095551	106	2.4	Up	0.026699	K	Putative transcription factor ARF family	---	1	0.000189019	128.68	YDK(1)EAILASDMGLK(1)QSR	3	-1.8417	13	0.439	0.406	0.952	1.322	1.597	1.393		ARF
RchiOBHm_Chr5g0014961	336	2.428	Up	0.029481	K	Putative transcription factor ARF family	---	1	0.00464981	66.619	SVK(1)VGWDESTAGER	2	2.0489	4	0.854	0.666			1.671	2.02		ARF
RchiOBHm_Chr3g0484331	326	0.557	Down	0.0074571	K	Putative transcription factor WD40-like family	---	0.99998	0.000930421	63.766	IAFHPSGK(1)YLGTTSFDK	3	-2.2032	5	1.154	1.001	1.186	0.571		0.67	PRPF4; U4/U6 small nuclear ribonucleoprotein PRP4	WD40
